# Supplementary material for: Multiple Superoxide Dismutase 1/Splicing Factor Serine Alanine 15 Variants Are Associated With the Development and Progression of Diabetic Nephropathy
Source: Oxford University Press journal article supplement (doi:10.2337/db07-1059), 2007-10-04
Supplement: db071059ola1.xls [file db071059ola1.xls]

## Sheet: uvmodel
		Persistent Microalbuminuria								Severe Nephropathy								>3-step progression								Severe retinopathy								Clinically significant macular edema
Variable	Label	size_uv_cnsaer30	Estimate_cnsaer30	StdErr_uv_cnsaer30	ChiSq_uv_cnsaer30	ProbChiSq_uv_cnsaer30	HazardRatio_uv_cnsaer30	HRLowerCL_uv_cnsaer30	HRUpperCL_uv_cnsaer30	size_uv_sevren3	Estimate_sevren3	StdErr_uv_sevren3	ChiSq_uv_sevren3	ProbChiSq_uv_sevren3	HazardRatio_uv_sevren3	HRLowerCL_uv_sevren3	HRUpperCL_uv_sevren3	size_uv_any3step	Estimate_any3step	StdErr_uv_any3step	ChiSq_uv_any3step	ProbChiSq_uv_any3step	HazardRatio_uv_any3step	HRLowerCL_uv_any3step	HRUpperCL_uv_any3step	size_uv_anysvret	Estimate_anysvret	StdErr_uv_anysvret	ChiSq_uv_anysvret	ProbChiSq_uv_anysvret	HazardRatio_uv_anysvret	HRLowerCL_uv_anysvret	HRUpperCL_uv_anysvret	size_uv_anycsme	Estimate_anycsme	StdErr_uv_anycsme	ChiSq_uv_anycsme	ProbChiSq_uv_anycsme	HazardRatio_uv_anycsme	HRLowerCL_uv_anycsme	HRUpperCL_uv_anycsme
cohort	Cohort indicator: 0=primary prevention, 1=secondary intervention	1296	0.364026	0.168039	4.6929	0.0302874	1.43911	1.03528	2.00046	1362	0.659674	0.237612	7.70762	0.00549883	1.93416	1.21405	3.0814	1362	-0.331494	0.0992073	11.1651	0.000833491	0.71785	0.591002	0.871926	1362	1.2503	0.182785	46.7893	7.90457e-12	3.49138	2.44012	4.99555	1362	0.612697	0.172483	12.6182	0.000382008	1.8454	1.31605	2.58767
cohtrx	Cohort*trx interaction	1296	0.594988	0.298619	3.96992	0.04632	1.81301	1.00975	3.25525	1362	0.439931	0.553564	0.631586	0.426774	1.5526	0.524644	4.59467	1362	0.117145	0.149998	0.609922	0.434817	1.12428	0.837909	1.50853	1362	0.112737	0.353894	0.101481	0.750059	1.11934	0.559405	2.23973	1362	0.417709	0.297141	1.97616	0.159796	1.51848	0.848167	2.71854
trx	Treatment indicator: 0=conventional, 1=experimental	1296	-1.2315	0.244697	25.3286	4.83496e-07	0.291855	0.180667	0.471469	1362	-1.82496	0.48324	14.2619	0.000159048	0.161225	0.0625312	0.415687	1362	-0.839564	0.10412	65.0191	7.41763e-16	0.431899	0.352172	0.529674	1362	-1.2606	0.315764	15.9378	6.54579e-05	0.283484	0.152668	0.52639	1362	-1.05455	0.250062	17.7846	2.47381e-05	0.348348	0.213383	0.568677
