# Supplementary material for: Multiple Superoxide Dismutase 1/Splicing Factor Serine Alanine 15 Variants Are Associated With the Development and Progression of Diabetic Nephropathy
Source: Oxford University Press journal article supplement (doi:10.2337/db07-1059), 2007-10-04
Supplement: db071059ola3.xls [file db071059ola3.xls]

## Sheet: marker_description
Locus	Gene_ID	gene_id_link	marker_id	New_rsid	marker_id_link	Allele_A	Allele_B	Reference_Sequence	Submitted_Sequence	DB_SNP_Allele1	DB_SNP_Allele2	A_Freq	A_std	B_Freq	B_std	AA_Freq	AA_std	AB_Freq	AB_std	BB_Freq	BB_std	NIndiv	NAllele	PIC	Het	Div	ChiSq	ProbChiSq	ProbExact	count_AA	count_AB	count_BB	MeanGC	chromosome	chromosome_location	location_delta	Cluster	Build	Locus_ID	Location	Variant	Heterozygosity	sehet	db_geno_avail	ncbi_num_chr	ncbi_num_ctg	_ncbi_sec_loc	ncbi_num_weight	CTG
ABCA1_rs10512335	ABCA1	http://www.ncbi.nlm.nih.gov/entrez/query.fcgi?db=gene&cmd=Retrieve&dopt=full_report&list_uids=19	rs10512335		http://www.ncbi.nlm.nih.gov/SNP/snp_ref.cgi?rs=10512335	A	C	GATCTCTTTCTGCTTGGCATTCAAGGCTCTTTGAAATAAGACTGTGACCCACTTTGATAGTTTTGTCCTGGATTATAAGACACATGCTCGAAGGAACTAT[A/C]GCTGGTTTTCTCACCAGACTGATTAACATATAGTATGGTTTGGTACCTGTTAAATGAGTCTCTCTCTACAGGTTTTCATCTTCTACTTTAAGAACCCCTT	AAGGGGTTCTTAAAGTAGAAGATGAAAACCTGTAGAGAGAGACTCATTTAACAGGTACCAAACCATACTATATGTTAATCAGTCTGGTGAGAAAACCAGC[T/G]ATAGTTCCTTCGAGCATGTGTCTTATAATCCAGGACAAAACTATCAAAGTGGGTCACAGTCTTATTTCAAAGAGCCTTGAATGCCAAGCAGAAAGAGATC	T	G	0.933554	0.00485563	0.0664464	0.00485563	0.873715	0.00200802	0.119677	0.00200802	0.00660793	0.00200802	1362	2	0.116367	0.119677	0.124063	1.70198	0.192029	0.1807	1190	163	9	0.876303	9	104760194	-5749		35	19	mrna-utr	G/T	0.126004	0.217083	YES	2	2	2	1	reference
ABCA1_rs10521071	ABCA1	http://www.ncbi.nlm.nih.gov/entrez/query.fcgi?db=gene&cmd=Retrieve&dopt=full_report&list_uids=19	rs10521071		http://www.ncbi.nlm.nih.gov/SNP/snp_ref.cgi?rs=10521071	A	G	GTTGCCACCAGCTAAATGGTCTCAGGGCTTCTAAACCTCACAAGAGCCAGGATTTCTGAAAGCAGATCTGTCCTGTACCCCAAGTCCTTGTTTCATCACT[A/G]TAGAACTACGAAGAAACTCTAACAAAATGTTAGAGATAGCCTCTCTTCCCCTGCTGATTTCCACTAAGCAAACACCAAGCAACCTTCAAAGGAAGACTTC	GTTGCCACCAGCTAAATGGTCTCAGGGCTTCTAAACCTCACAAGAGCCAGGATTTCTGAAAGCAGATCTGTCCTGTACCCCAAGTCCTTGTTTCATCACT[A/G]TAGAACTACGAAGAAACTCTAACAAAATGTTAGAGATAGCCTCTCTTCCCCTGCTGATTTCCACTAAGCAAACACCAAGCAACCTTCAAAGGAAGACTTC	A	G	0.97467	0.00310427	0.0253304	0.00310427	0.951542	0.00121601	0.0462555	0.00121601	0.00220264	0.00121601	1362	2	0.0481585	0.0462555	0.0493775	5.44493	0.0196252	0.051	1296	63	3	0.879334	9	104754445	-3231		35	19	mrna-utr	A/G	0.0595183	0.161916	YES	2	2	2	1	reference
ABCA1_rs10820743	ABCA1	http://www.ncbi.nlm.nih.gov/entrez/query.fcgi?db=gene&cmd=Retrieve&dopt=full_report&list_uids=19	rs10820743		http://www.ncbi.nlm.nih.gov/SNP/snp_ref.cgi?rs=10820743	A	G	TTTGTGGGTAGCATATGGTCCACTCTCTCAGTTCATTGTCCTAAAGATGCTTCATCAGAAAGGAATAACTTCCACCCCGTTACTCTCTGTCCCCTTACTCTGCTTTATTTTTCTTCGTCA[A/G]TCCTACCACCACCACCCACTGTTTGAACAACCCACTATTATTTGTCTGTTTCCCATCCCTGGTAGAATAGGAGCCCCATGAATGAAGGAACTTTGCTTCTGTTGTTCACCACTGAATCTC	GAGATTCAGTGGTGAACAACAGAAGCAAAGTTCCTTCATTCATGGGGCTCCTATTCTACCAGGGATGGGAAACAGACAAATAATAGTGGGTTGTTCAAACAGTGGGTGGTGGTGGTAGGA[T/C]TGACGAAGAAAAATAAAGCAGAGTAAGGGGACAGAGAGTAACGGGGTGGAAGTTATTCCTTTCTGATGAAGCATCTTTAGGACAATGAACTGAGAGAGTGGACCATATGCTACCCACAAA	T	C	0.68906	0.00881262	0.31094	0.00881262	0.4721	0.00578061	0.433921	0.00578061	0.0939794	0.00578061	1362	2	0.336701	0.433921	0.428512	0.21695	0.641374	0.662	643	591	128	0.607025	9	104751214	6981		35	19	mrna-utr	C/T			YES	2	2	2	1	reference
ABCA1_rs12344687	ABCA1	http://www.ncbi.nlm.nih.gov/entrez/query.fcgi?db=gene&cmd=Retrieve&dopt=full_report&list_uids=19	rs12344687		http://www.ncbi.nlm.nih.gov/SNP/snp_ref.cgi?rs=12344687	A	C	TTCAGCTTAAAATGGACACTGAAATGTTAAATATTGGACTGGCCTCATTTATTTCTCCTGTCTGTTGGTCCAATTTGAATCTTAAGGCGTCTTTCAACTGGAATTTTTTGTTTCTCTCAA[A/C]TAAAAATTGTTCTTTGTAAGTTTGAATCAGAACAAAATCCTGAATGTTGAGGGTTTCCTAAAGGCTGTTTCTTTATGCAAAAGCCTGAAACCCGATGTTGATGTTGGCTGCTTAAAATTA	TAATTTTAAGCAGCCAACATCAACATCGGGTTTCAGGCTTTTGCATAAAGAAACAGCCTTTAGGAAACCCTCAACATTCAGGATTTTGTTCTGATTCAAACTTACAAAGAACAATTTTTA[G/T]TTGAGAGAAACAAAAAATTCCAGTTGAAAGACGCCTTAAGATTCAAATTGGACCAACAGACAGGAGAAATAAATGAGGCCAGTCCAATATTTAACATTTCAGTGTCCATTTTAAGCTGAA	G	T	0.085536	0.00533431	0.914464	0.00533431	0.00660793	0.00203331	0.157856	0.00203331	0.835536	0.00203331	1362	2	0.144203	0.157856	0.156439	0.111736	0.738176	0.8601	9	215	1138	0.893189	9	104758195	-40777		35	19	mrna-utr	G/T	0.152778	0.230321	YES	2	2	2	1	reference
ABCA1_rs12346461	ABCA1	http://www.ncbi.nlm.nih.gov/entrez/query.fcgi?db=gene&cmd=Retrieve&dopt=full_report&list_uids=19	rs12346461		http://www.ncbi.nlm.nih.gov/SNP/snp_ref.cgi?rs=12346461	A	C	AGAAACTCCATACTCAGTCGGGATGGCAGGCTGCTGCCCCGGATCTCTCTGCCAGTCCTGTCCCTTTCCGCCCCTTGACCTCAACAAGGTGATATGTCCTCCAAAGGGTTCATCTCCAGC[A/C]CAGTGACAAAATGCCCAAAGATATTTCTTATCTTTTCCTGGCAAAATCCTTATAAGCTTCAGAGAGCTCCACAACCTTAAAAAAAAAAGGTATTTCAGAATCCCCCAAGTCAGGAGCCAA	AGAAACTCCATACTCAGTCGGGATGGCAGGCTGCTGCCCCGGATCTCTCTGCCAGTCCTGTCCCTTTCCGCCCCTTGACCTCAACAAGGTGATATGTCCTCCAAAGGGTTCATCTCCAGC[A/C]CAGTGACAAAATGCCCAAAGATATTTCTTATCTTTTCCTGGCAAAATCCTTATAAGCTTCAGAGAGCTCCACAACCTTAAAAAAAAAAGGTATTTCAGAATCCCCCAAGTCAGGAGCCAA	A	C	0.958119	0.00382586	0.041881	0.00382586	0.917708	0.00100376	0.0808229	0.00100376	0.00146951	0.00100376	1361	2	0.0770336	0.0808229	0.0802539	0.0684186	0.793653	1	1249	110	2	0.862225	9	104717418	37537		35	19	intron	A/C	0.0798612	0.183174	YES	2	2	2	1	reference
ABCA1_rs12684473	ABCA1	http://www.ncbi.nlm.nih.gov/entrez/query.fcgi?db=gene&cmd=Retrieve&dopt=full_report&list_uids=19	rs12684473		http://www.ncbi.nlm.nih.gov/SNP/snp_ref.cgi?rs=12684473	A	G	TTGGGGAGTTTTCTGCATGGTAGAATAGACCCAAAGGAAAAGAAAGAAAGACAGTGACTAAGATTTGGGTTTGTCTGCCCCACCAAATGCTTTGAGCACTTTCATAAATATAAATCCTTC[A/G]GGTTGGGAGAAGGTTGAACATCTGAAGACACTGATTCTTCAGAGATGTAATCCAAACAAAGTGATCTTTGGTGATATGGTCACTAAACCATTTATCCCAAAATTCTCTTGGAAAACCGTC	GACGGTTTTCCAAGAGAATTTTGGGATAAATGGTTTAGTGACCATATCACCAAAGATCACTTTGTTTGGATTACATCTCTGAAGAATCAGTGTCTTCAGATGTTCAACCTTCTCCCAACC[T/C]GAAGGATTTATATTTATGAAAGTGCTCAAAGCATTTGGTGGGGCAGACAAACCCAAATCTTAGTCACTGTCTTTCTTTCTTTTCCTTTGGGTCTATTCTACCATGCAGAAAACTCCCCAA	T	C	0.996696	0.00109768	0.00330396	0.00109768	0.993392	7.25337e-06	0.00660793	7.25337e-06			1362	2	0.00656441	0.00660793	0.0065861	0.0149666	0.902631	1	1353	9	0	0.878	9	104754955	-127778		35	19	mrna-utr	C/T			NO	2	2	2	1	reference
ABCA1_rs1331924	ABCA1	http://www.ncbi.nlm.nih.gov/entrez/query.fcgi?db=gene&cmd=Retrieve&dopt=full_report&list_uids=19	rs1331924		http://www.ncbi.nlm.nih.gov/SNP/snp_ref.cgi?rs=1331924	C	G	TTTAGTAAAAAGCATAGCTAGGAATAGTAGATCAGGAATTCAAGCACCAATTCAAGATACAAACTGCTCTTGGACCTATGGGCGGGAGTGT[C/G]GGGGCAGGAATCCACACCCTGAGAAGTAAATCTGTTTTGACACTCAAAGCTTACTTGGTCAAGTGTTGTCTGAGAAACAGAGTAGTCTTCTATGTGGAGTCGCTTTTTGCTCTGGGAGAG	TTTAGTAAAAAGCATAGCTAGGAATAGTAGATCAGGAATTCAAGCACCAATTCAAGATACAAACTGCTCTTGGACCTATGGGCGGGAGTGT[C/G]GGGGCAGGAATCCACACCCTGAGAAGTAAATCTGTTTTGACACTCAAAGCTTACTTGGTCAAGTGTTGTCTGAGAAACAGAGTAGTCTTCTATGTGGAGTCGCTTTTTGCTCTGGGAGAG	C	G	0.85793	0.00677944	0.14207	0.00677944	0.739354	0.00348502	0.237151	0.00348502	0.0234949	0.00348502	1362	2	0.21406	0.237151	0.243773	1.00494	0.316117	0.3154	1007	323	32	0.928394	9	104627177	142828		35	19	intron	C/G	0.335114	0.235065	YES	2	2	2	1	reference
ABCA1_rs1800977	ABCA1	http://www.ncbi.nlm.nih.gov/entrez/query.fcgi?db=gene&cmd=Retrieve&dopt=full_report&list_uids=19	rs1800977		http://www.ncbi.nlm.nih.gov/SNP/snp_ref.cgi?rs=1800977	A	G	GCTCTGTTGGTGCGCGGAGCTCCCCGCCCTGCCCTGCCGCAGCCCGGGAGAGAAGGGTCGGCTCGGCTCTGCGGGTCCCGGCCCCACTCACTCTCGCTCGCAATTACGGGGTTTTTGCCG[A/G]GACTAGTTCCTTTTATAGATTCGGCTGCACCGAGCGCAGAGGTTACTATCGGTCAAAGCCTGTGCTCTCCCTCCTCCCCGCCCCCTTCCCGGCCTCTGTTTATGTAGTTCAGTCACTCAG	CTGAGTGACTGAACTACATAAACAGAGGCCGGGAAGGGGGCGGGGAGGAGGGAGAGCACAGGCTTTGACCGATAGTAACCTCTGCGCTCGGTGCAGCCGAATCTATAAAAGGAACTAGTC[C/T]CGGCAAAAACCCCGTAATTGCGAGCGAGAGTGAGTGGGGCCGGGACCCGCAGAGCCGAGCCGACCCTTCTCTCCCGGGCTGCGGCAGGGCAGGGCGGGGAGCTCCGCGCACCAACAGAGC	C	T	0.359765	0.00926435	0.640235	0.00926435	0.132893	0.00625652	0.453744	0.00625652	0.413363	0.00625652	1362	2	0.354561	0.453744	0.460668	0.307675	0.57911	0.6021	181	618	563	0.955119	9	104770005	-56725		35	19	locus-region	C/T	0.459861	0.135861	YES	2	2	2	1	reference
ABCA1_rs1929841	ABCA1	http://www.ncbi.nlm.nih.gov/entrez/query.fcgi?db=gene&cmd=Retrieve&dopt=full_report&list_uids=19	rs1929841		http://www.ncbi.nlm.nih.gov/SNP/snp_ref.cgi?rs=1929841	A	C	AATTTTCTTCTAGCAGCAGAAACAGAATAAGACAATACCCATGTCTTACTGAGAAGAGGGAAGGTGGGAGAAGTTACTGGAAGTCCCTAGAATGAGGGTTGAAGACCCTGAATGGTAACA[A/C]TTCCCCCAAAGAGCCAGTGCAGCCCCAGAGGGAAAGGATGTCCTGGTCACACTGGCCAGGGCGTGGAAGGGCAC	GTGCCCTTCCACGCCCTGGCCAGTGTGACCAGGACATCCTTTCCCTCTGGGGCTGCACTGGCTCTTTGGGGGAA[G/T]TGTTACCATTCAGGGTCTTCAACCCTCATTCTAGGGACTTCCAGTAACTTCTCCCACCTTCCCTCTTCTCAGTAAGACATGGGTATtgtcttattctgtttctgctgctagaagaaaatt	G	T	0.801395	0.00768394	0.198605	0.00768394	0.643906	0.00436386	0.314978	0.00436386	0.041116	0.00436386	1362	2	0.267658	0.314978	0.318322	0.150317	0.698232	0.6687	877	429	56	0.856319	9	104713280	-102		35	19	intron	G/T	0.231111	0.249285	YES	2	2	2	1	reference
ABCA1_rs1929842	ABCA1	http://www.ncbi.nlm.nih.gov/entrez/query.fcgi?db=gene&cmd=Retrieve&dopt=full_report&list_uids=19	rs1929842		http://www.ncbi.nlm.nih.gov/SNP/snp_ref.cgi?rs=1929842	C	G	ACTGGCTCTTTGGGGGAATTGTTACCATTCAGGGTCTTCAACCCTCATTCTAGGGACTTCCAGTAACTTCTCCCACCTTCCCTCTTCTCAGTAAGACATGGGTATTGTCTTATTCTGTTT[C/G]TGCTGCTAGAAGAAAATTCTCGAGACTGAGTAATTTATACACAATAGAAATTTACTTCTCACAGTTCTGGAGGCTGGGAAATCCAAAATCAAGGTGTTGGCAGGTTTGGTGTCTGGTGAG	ACTGGCTCTTTGGGGGAATTGTTACCATTCAGGGTCTTCAACCCTCATTCTAGGGACTTCCAGTAACTTCTCCCACCTTCCCTCTTCTCAGTAAGACATGGGTATTGTCTTATTCTGTTT[G/C]TGCTGCTAGAAGAAAATTCTCGAGACTGAGTAATTTATACACAATAGAAATTTACTTCTCACAGTTCTGGAGGCTGGGAAATCCAAAATCAAGGTGTTGGCAGGTTTGGTGTCTGGTGAG	G	C	0.768722	0.00809794	0.231278	0.00809794	0.591777	0.00483588	0.353891	0.00483588	0.0543319	0.00483588	1362	2	0.292359	0.353891	0.355576	0.0305901	0.861158	0.8771	806	482	74	0.95921	9	104713178	-68947		35	19	intron	C/G	0.277778	0.248452	YES	2	2	2	1	reference
ABCA1_rs1999431	ABCA1	http://www.ncbi.nlm.nih.gov/entrez/query.fcgi?db=gene&cmd=Retrieve&dopt=full_report&list_uids=19	rs1999431		http://www.ncbi.nlm.nih.gov/SNP/snp_ref.cgi?rs=1999431	A	G	AGGGTTCCCACTCTCCCAACTCCCCATCTGCTTGCCTCCAGACCCACATTCACACACGAGCCACTGGGTTGGAGGAGCATCTGTGAGATGAAACACCATTCTTTCCTCAATGTCTCAGCT[A/G]TCTAACTGTGTGTGTAATCAGGCCAGGTCCTCCCTGCTGGGCAGAAACCATGGGAGTTAAGAGATTGCCAACATTTATTAGAGGAAGCTGACGTGTAACTTCTCTGAGGCAAAATTTAGC	AGGGTTCCCACTCTCCCAACTCCCCATCTGCTTGCCTCCAGACCCACATTCACACACGAGCCACTGGGTTGGAGGAGCATCTGTGAGATGAAACACCATTCTTTCCTCAATGTCTCAGCT[A/G]TCTAACTGTGTGTGTAATCAGGCCAGGTCCTCCCTGCTGGGCAGAAACCATGGGAGTTAAGAGATTGCCAACATTTATTAGAGGAAGCTGACGTGTAACTTCTCTGAGGCAAAATTTAGC	A	G	0.962555	0.00356607	0.0374449	0.00356607	0.92511	0.000267062	0.0748899	0.000267062			1362	2	0.0694875	0.0748899	0.0720856	2.06116	0.151095	0.2588	1260	102	0	0.893798	9	104644231	71193		35	19	intron	A/G	0.128012	0.218218	YES	2	2	2	1	reference
ABCA1_rs2000069	ABCA1	http://www.ncbi.nlm.nih.gov/entrez/query.fcgi?db=gene&cmd=Retrieve&dopt=full_report&list_uids=19	rs2000069		http://www.ncbi.nlm.nih.gov/SNP/snp_ref.cgi?rs=2000069	A	G	ATCATCATAAAATGCAGGGGATACACACATGAAGGAGCCGAAGTTCAGAGAGGCCAAGTAACTTGCCTAAGAAAGCACAGCTGGCAAGGGGCAGTAATAGGACCAGAATTCCAGTTTCTC[A/G]TGCTCTGTTGTTGTTATATCCTAAAGAGAGCAGCTCTGAGTAGCCAGAAGCTTCCCTAAAGTCACAGGACATGGGGCATGGGCTGGCTGGGATGAGAAAGGAGACAAGAGGGCTTCTGAA	TTCAGAAGCCCTCTTGTCTCCTTTCTCATCCCAGCCAGCCCATGCCCCATGTCCTGTGACTTTAGGGAAGCTTCTGGCTACTCAGAGCTGCTCTCTTTAGGATATAACAACAACAGAGCA[C/T]GAGAAACTGGAATTCTGGTCCTATTActgccccttgccagctgtgctttcttaggcaagttacttggcctctctgaacttcggctccttcatgtgtGTATCCCCTGCATTTTATGATGAT	C	T	0.448605	0.00965436	0.551395	0.00965436	0.207783	0.00670397	0.481645	0.00670397	0.310573	0.00670397	1362	2	0.372345	0.481645	0.494717	0.950995	0.329466	0.3214	283	656	423	0.964121	9	104715424	-37129		35	19	intron	C/T	0.449861	0.150185	YES	2	2	2	1	reference
ABCA1_rs2065412	ABCA1	http://www.ncbi.nlm.nih.gov/entrez/query.fcgi?db=gene&cmd=Retrieve&dopt=full_report&list_uids=19	rs2065412		http://www.ncbi.nlm.nih.gov/SNP/snp_ref.cgi?rs=2065412	A	G	CCTGAGATACTCATTCTCAGGGCACTGTGTGAATGATGAGCTGCTGTTACTGTGTGGAGGGGAAATGCACTTAGTGCTTCAGAGCCACTTGAAAGGGATAAGTGCTCTAGAGACAATTGG[A/G]TTCAAATGTGGAGCAGGCTGAGCAAGAACAGAATGTCTCCTTTGCCTGAGCCTGAGTGCTGTTAATCACATCTTCCTGCCTTGGGCTGAGTTAGAGAATCATTAGACTATTTCCTGTTTC	GAAACAGGAAATAGTCTAATGATTCTCTAACTCAGCCCAAGGCAGGAAGATGTGATTAACAGCACTCAGGCTCAGGCAAAGGAGACATTCTGTTCTTGCTCAGCCTGCTCCACATTTGAA[C/T]CCAATTGTCTCTAGAGCACTTATCCCTTTCAAGTGGCTCTGAAGCACTAAGTGCATTTCCCCTCCACACAGTAACAGCAGCTCATCATTCACACAGTGCCCTGAGAATGAGTATCTCAGG	C	T	0.598752	0.00948723	0.401248	0.00948723	0.363436	0.00651933	0.470631	0.00651933	0.165932	0.00651933	1362	2	0.365058	0.470631	0.480496	0.574073	0.448645	0.4664	495	641	226	0.872835	9	104678295	-30035		35	19	intron	C/T	0.496528	0.0415217	YES	2	2	2	1	reference
ABCA1_rs2066716	ABCA1	http://www.ncbi.nlm.nih.gov/entrez/query.fcgi?db=gene&cmd=Retrieve&dopt=full_report&list_uids=19	rs2066716		http://www.ncbi.nlm.nih.gov/SNP/snp_ref.cgi?rs=2066716	A	G	GGTGAGGGAATAGATGCATGTTTGTGGTTGTTACGGAATGATCCTGTGCTCCTGAGGCAACAGAAAGGCCAGGCCATCTCTGGTAATCCTACTCTTGCTGTCTTCCCTTTGCAGAGACAC[A/G]CCCTGCCAGGCAGGGGAGGAAGAGTGGACCACTGCCCCAGTTCCCCAGACCATCATGGACCTCTTCCAGAATGGGAACTGGACAATGCAGAACCCTTCACCTGCATGCCAGTGTAGCAGC	GGTGAGGGAATAGATGCATGTTTGTGGTTGTTACGGAATGATCCTGTGCTCCTGAGGCAACAGAAAGGCCAGGCCATCTCTGGTAATCCTACTCTTGCTGTCTTCCCTTTGCAGAGACAC[A/G]CCCTGCCAGGCAGGGGAGGAAGAGTGGACCACTGCCCCAGTTCCCCAGACCATCATGGACCTCTTCCAGAATGGGAACTGGACAATGCAGAACCCTTCACCTGCATGCCAGTGTAGCAGC	A	G	0.0837004	0.00534305	0.9163	0.00534305	0.00807636	0.00220517	0.151248	0.00220517	0.840675	0.00220517	1362	2	0.141625	0.151248	0.153389	0.265397	0.606436	0.604	11	206	1145	0.852596	9	104648260	22773		35	19	coding-synon	A/G	0.231111	0.249285	YES	2	2	2	1	reference
ABCA1_rs2066717	ABCA1	http://www.ncbi.nlm.nih.gov/entrez/query.fcgi?db=gene&cmd=Retrieve&dopt=full_report&list_uids=19	rs2066717		http://www.ncbi.nlm.nih.gov/SNP/snp_ref.cgi?rs=2066717	A	G	CTGAGTAAATCCAGGCCAGCGTCATGAAGAGGGGCATTGACCGGCTCATCACCCGCAGAAAGCTGGAGGCCCCAAGGAAGGACAAGGGGAGAAAGAAAGACACACGTGAGCCAGGGTGAT[A/G]GGCCAAGGCCTCTGAGCCTGCATGCTAGAGGGAGCACCACATCTGGGCCACAGAAGGACAGGCCCTCTAGACTCTGAAATGTACGTATGATCCAATGCTTCACGAGCAATGCAATGTAGA	TCTACATTGCATTGCTCGTGAAGCATTGGATCATACGTACATTTCAGAGTCTAGAGGGCCTGTCCTTCTGTGGCCCAGATGTGGTGCTCCCTCTAGCATGCAGGCTCAGAGGCCTTGGCC[C/T]ATCACCCTGGCTCACGTGTGTCTTTCTTTCTCCCCTTGTCCTTCCTTGGGGCCTCCAGCTTTCTGCGGGTGATGAGCCGGTCAATGCCCCTCTTCATGACGCTGGCCTGGATTTACTCAG	C	T	0.0591043	0.00452553	0.940896	0.00452553	0.00367107	0.00154015	0.110866	0.00154015	0.885463	0.00154015	1362	2	0.105037	0.110866	0.111222	0.0139161	0.906094	0.81	5	151	1206	0.883185	9	104671033	32551		35	19	intron	C/T	0.193194	0.243461	YES	2	2	2	1	reference
ABCA1_rs2230805	ABCA1	http://www.ncbi.nlm.nih.gov/entrez/query.fcgi?db=gene&cmd=Retrieve&dopt=full_report&list_uids=19	rs2230805		http://www.ncbi.nlm.nih.gov/SNP/snp_ref.cgi?rs=2230805	A	G	ATTGTGCCCACTTTTTTTTTTTTTTTGAGTTACTTACTAAATAAAAATAAAACACTATTTCTCAATAGACTTGAAGCTTCAAGATTTCCTGGTGGACAATGAAACCTTCTCTGGGTTCCT[A/G]TATCACAACCTCTCTCTCCCAAAGTCTACTGTGGACAAGATGCTGAGGGCTGATGTCATTCTCCACAAGGTAAGCTGATGCCTCCAGCTTCCTCAGTAGGGCTGATGGCAATTACGTTGT	ATTGTGCCCACTTTTTTTTTTTTTTTGAGTTACTTACTAAATAAAAATAAAACACTATTTCTCAATAGACTTGAAGCTTCAAGATTTCCTGGTGGACAATGAAACCTTCTCTGGGTTCCT[A/G]TATCACAACCTCTCTCTCCCAAAGTCTACTGTGGACAAGATGCTGAGGGCTGATGTCATTCTCCACAAGGTAAGCTGATGCCTCCAGCTTCCTCAGTAGGGCTGATGGCAATTACGTTGT	A	G	0.26138	0.00854496	0.73862	0.00854496	0.0741557	0.00532136	0.374449	0.00532136	0.551395	0.00532136	1362	2	0.311576	0.374449	0.386121	1.24456	0.264593	0.2662	101	510	751	0.867913	9	104703584	-3730		35	19	coding-synon	A/G	0.23745	0.249685	YES	2	2	2	1	reference
ABCA1_rs2253175	ABCA1	http://www.ncbi.nlm.nih.gov/entrez/query.fcgi?db=gene&cmd=Retrieve&dopt=full_report&list_uids=19	rs2253175		http://www.ncbi.nlm.nih.gov/SNP/snp_ref.cgi?rs=2253175	A	G	TGTTTAAAAACCCATCATAAAGATGACATTGTGGGCTGTCACAGTTGGAAGGCCCTGGAATTAGATGAGACCACACTATTTAGCTTACTTAGTAATAACATTGCAAAGAAAAATTCCGAC[A/G]AAGTTTTTTCAGCCTAGGAATCAATAGTTCAGAGAAGCACTCTATGAGAATACCCATTCATTCTTAACCAAAAAATACTGGTGAGCCTGAGCAGTTTGGTCATCAGAGTGTTTTATATAG	CTATATAAAACACTCTGATGACCAAACTGCTCAGGCTCACCAGTATTTTTTGGTTAAGAATGAATGGGTATTCTCATAGAGTGCTTCTCTGAACTATTGATTCCTAGGCTGAAAAAACTT[C/T]GTCGGAATTTTTCTTTGCAATGTTATTACTAAGTAAGCTAAATAGTGTGGTCTCATCTAATTCCAGGGCCTTCCAACTGTGACAGCCCACAATGTCATCTTTATGATGGGTTTTTAAACA	C	T	0.278267	0.00868848	0.721733	0.00868848	0.082232	0.00550366	0.39207	0.00550366	0.525698	0.00550366	1362	2	0.321	0.39207	0.401669	0.777794	0.377817	0.3765	112	534	716	0.878251	9	104699854	-38550		35	19	intron	C/T	0.266528	0.249453	YES	2	2	2	1	reference
ABCA1_rs2254884	ABCA1	http://www.ncbi.nlm.nih.gov/entrez/query.fcgi?db=gene&cmd=Retrieve&dopt=full_report&list_uids=19	rs2254884		http://www.ncbi.nlm.nih.gov/SNP/snp_ref.cgi?rs=2254884	A	C	AGCATCCACCCTTTCAACTAACCATAAATTTAGTGCACCATGTTGGGGACAAAAAGATGAATAAAGACACAGCATCTCCTCTCAGGAATCTCAGTCTCAATGCCCTTTATCTCTTCTGTG[A/C]TAACAGAAGAGTATCCCATGGCTTCACAGAAGCCTAGCCATGAGATACAGCCACACTTCTCAAAAGCCCCCCGCTCTCTCTCAGTCCATTTACTCAGAATAAATACACATCAGGCACCTT	AGCATCCACCCTTTCAACTAACCATAAATTTAGTGCACCATGTTGGGGACAAAAAGATGAATAAAGACACAGCATCTCCTCTCAGGAATCTCAGTCTCAATGCCCTTTATCTCTTCTGTG[C/A]TAACAGAAGAGTATCCCATGGCTTCACAGAAGCCTAGCCATGAGATACAGCCACACTTCTCAAAAGCCCCCCGCTCTCTCTCAGTCCATTTACTCAGAATAAATACACATCAGGCACCTT	C	A	0.713289	0.0087118	0.286711	0.0087118	0.511013	0.00556793	0.404552	0.00556793	0.0844347	0.00556793	1362	2	0.325369	0.404552	0.409015	0.16218	0.687157	0.6945	696	551	115	0.906893	9	104661304	20929		35	19	intron	A/C	0.459861	0.135861	YES	2	2	2	1	reference
ABCA1_rs2274873	ABCA1	http://www.ncbi.nlm.nih.gov/entrez/query.fcgi?db=gene&cmd=Retrieve&dopt=full_report&list_uids=19	rs2274873		http://www.ncbi.nlm.nih.gov/SNP/snp_ref.cgi?rs=2274873	A	G	GGCTTTGTAGTTGTTGTCCTCATACCAGTTGAGAGACTTGATCTTCAGCCCCCCTCCCTC[A/G]GGATGCCCGCAGACAATACGAGACACAGCCTGGTAGATTTGGGTGGAGGAGCTGGAGCTG	GGCTTTGTAGTTGTTGTCCTCATACCAGTTGAGAGACTTGATCTTCAGCCCCCCTCCCTC[G/A]GGATGCCCGCAGACAATACGAGACACAGCCTGGTAGATTTGGGTGGAGGAGCTGGAGCTG	G	A	0.10536	0.00592538	0.89464	0.00592538	0.0124816	0.00267462	0.185756	0.00267462	0.801762	0.00267462	1362	2	0.170749	0.185756	0.188518	0.292345	0.588722	0.5585	17	253	1092	0.957269	9	104682233	42402		35	19	coding-synon	A/G	0.152778	0.230321	YES	2	2	2	1	reference
ABCA1_rs2275542	ABCA1	http://www.ncbi.nlm.nih.gov/entrez/query.fcgi?db=gene&cmd=Retrieve&dopt=full_report&list_uids=19	rs2275542		http://www.ncbi.nlm.nih.gov/SNP/snp_ref.cgi?rs=2275542	A	G	CTTGGTGGCTGGCCTGTGGGGCCCCTCTCCAGGAGGCATTGGTGAAGAAACTAGGGGAGCTGGTTGCCACAGACAGTGATGTACTAATCTTCTCTGGGAAGACAGAAGAAAAGTCCCCAG[A/G]GAAGAATACTACAGACTTGGCCTTAGGGACAGCTAGGGGTGCAGATTGCTGCCAACTGCATTTTTTCTGAAGTTGGCCATATGGTTGCAGTGAATGGATTTATAGACAGAGTATTTCTGT	ACAGAAATACTCTGTCTATAAATCCATTCACTGCAACCATATGGCCAACTTCAGAAAAAATGCAGTTGGCAGCAATCTGCACCCCTAGCTGTCCCTAAGGCCAAGTCTGTAGTATTCTTC[C/T]CTGGGGACTTTTCTTCTGTCTTCCCAGAGAAGATTAGTACATCACTGTCTGTGGCAACCAGCTCCCCTAGTTTCTTCACCAATGCCTCCTGGAGAGGGGCCCCACAGGCCAGCCACCAAG	C	T	0.330396	0.00888131	0.669604	0.00888131	0.10279	0.00594709	0.455213	0.00594709	0.441997	0.00594709	1362	2	0.34458	0.455213	0.442469	1.12979	0.28782	0.2945	140	620	602	0.906968	9	104724635	6132		35	19	intron	C/T	0.366528	0.221182	YES	2	2	2	1	reference
ABCA1_rs2275544	ABCA1	http://www.ncbi.nlm.nih.gov/entrez/query.fcgi?db=gene&cmd=Retrieve&dopt=full_report&list_uids=19	rs2275544		http://www.ncbi.nlm.nih.gov/SNP/snp_ref.cgi?rs=2275544	A	G	AATTAACGTGGGCTAAATTGGACTTTTCCAAAGATGCTGTCTTTGGGAAACATCACACATGCTTTGGATCAGAAAACCTAGGCTTCTAATTTGTTGATAAGGCATGAACTCAGGAG[A/G]CTGTTTTCAGTCCTAGTGAATGGTGATAATTGTAATTNTAACAGTAGACAACATCTCTTTTACACATTTTAAATCATGAAAATAGAATAACCTTACTGATAATTTTAGAAAGTGGTGATT	AATCACCACTTTCTAAAATTATCAGTAAGGTTATTCTATTTTCATGATTTAAAATGTGTAAAAGAGATGTTGTCTACTGTTANAATTACAATTATCACCATTCACTAGGACTGAAAACAG[C/T]CTCCTGAGTTCATGCCTTATCAACAAATTAGAAGCCTAGGTTTTCTGATCCAAAGCATGTGTGATGTTTCCCAAAGACAGCATCTTTGGAAAAGTCCAATTTAGCCCACGTTAATT	C	T	0.858297	0.00685425	0.141703	0.00685425	0.743025	0.00363674	0.230543	0.00363674	0.0264317	0.00363674	1362	2	0.213662	0.230543	0.243247	3.71488	0.0539294	0.0555	1012	314	36	0.966635	9	104730767	-99674		35	19	intron	C/T	0.166528	0.235653	YES	2	2	2	1	reference
ABCA1_rs2297406	ABCA1	http://www.ncbi.nlm.nih.gov/entrez/query.fcgi?db=gene&cmd=Retrieve&dopt=full_report&list_uids=19	rs2297406		http://www.ncbi.nlm.nih.gov/SNP/snp_ref.cgi?rs=2297406	A	G	CTGCACAACTGCTTTCCTAGGCTTGCTCCTAGTACCAAGCTCCTGACGCATATAGCAGTGGCAGTAATAACCAGCCCATAGTAAGGTTTGTCACAGGGACTGGTTGTAAGAACTGATTTG[A/G]TTGGTATAGCTGTGAGGGCCTGGCACGGTGTCCACGTGTGCCTCAATCCTAATTCTGAAAAAGGCTGACCCTGGGGGTGCTAATTAGATACACAGAGAGGAATGAATGCTGCCAGAAGGC	GCCTTCTGGCAGCATTCATTCCTCTCTGTGTATCTAATTAGCACCCCCAGGGTCAGCCTTTTTCAGAATTAGGATTGAGGCACACGTGGACACCGTGCCAGGCCCTCACAGCTATACCAA[C/T]CAAATCAGTTCTTACAACCAGTCCCTGTGACAAACCTTACTATGGGCTGGTTATTACTGCCACTGCTATATGCGTCAGGAGCTTGGTACTAGGAGCAAGCCTAGGAAAGCAGTTGTGCAG	C	T	0.312408	0.00900185	0.687592	0.00900185	0.103524	0.00587073	0.417768	0.00587073	0.478708	0.00587073	1362	2	0.337333	0.417768	0.429619	1.03633	0.308678	0.3138	141	569	652	0.545044	9	104631093	24708		35	19	intron	C/T	0.426528	0.177025	YES	2	2	2	1	reference
ABCA1_rs2297409	ABCA1	http://www.ncbi.nlm.nih.gov/entrez/query.fcgi?db=gene&cmd=Retrieve&dopt=full_report&list_uids=19	rs2297409		http://www.ncbi.nlm.nih.gov/SNP/snp_ref.cgi?rs=2297409	A	G	ACCCCGCAGAAAAGATAATAAATACATGGGTTCAGAGGATTGAGGCACCATCTTTATGTCTTTAAAGGAAGTGATATGGATAGGCTCTTTCAGGTTTGATCACATGCACGATGCTGCAAA[A/G]AACAAGTGGCTTTTACCATTTCCTCACTTCTCTTTGGACTCTGTAGGGATCTATCACCTTGGCTAAAGGCCATCCAAAGAAAACAGGTGAGAGCATGAGAGAGAATTTCACATTCAAACA	ACCCCGCAGAAAAGATAATAAATACATGGGTTCAGAGGATTGAGGCACCATCTTTATGTCTTTAAAGGAAGTGATATGGATAGGCTCTTTCAGGTTTGATCACATGCACGATGCTGCAAA[G/A]AACAAGTGGCTTTTACCATTTCCTCACTTCTCTTTGGACTCTGTAGGGATCTATCACCTTGGCTAAAGGCCATCCAAAGAAAACAGGTGAGAGCATGAGAGAGAATTTCACATTCAAACA	G	A	0.190529	0.00757017	0.809471	0.00757017	0.0381791	0.00424143	0.304699	0.00424143	0.657122	0.00424143	1362	2	0.260883	0.304699	0.308455	0.201948	0.653153	0.666	52	415	895	0.907308	9	104655801	28261		35	19	intron	A/G	0.28875	0.246979	YES	2	2	2	1	reference
ABCA1_rs2472448	ABCA1	http://www.ncbi.nlm.nih.gov/entrez/query.fcgi?db=gene&cmd=Retrieve&dopt=full_report&list_uids=19	rs2472448		http://www.ncbi.nlm.nih.gov/SNP/snp_ref.cgi?rs=2472448	A	G	CTGTTCCAATAAGCAACAAAAGGCAAAATGGCCTGGTTCTCTGTCCCCTTTCTGTCTGTATGCCTCGTACAGGTTATGAAAAGAAAAAGTTGGGAAAAGCTGTCCACCTCACCTAATTGT[A/G]TTCTTGTGGAGTGTGCTAGATGCCCCCTCTCTGGAGAAAAAAAATCCTTGTGGCCTCTGACCCACCTCTGGAGAGCCTAGTTCCCTTCTGGAGGCAGAAGGCAAAGCTTAGGACCTAGAG	CTGTTCCAATAAGCAACAAAAGGCAAAATGGCCTGGTTCTCTGTCCCCTTTCTGTCTGTATGCCTCGTACAGGTTATGAAAAGAAAAAGTTGGGAAAAGCTGTCCACCTCACCTAATTGT[A/G]TTCTTGTGGAGTGTGCTAGATGCCCCCTCTCTGGAGAAAAAAAATCCTTGTGGCCTCTGACCCACCTCTGGAGAGCCTAGTTCCCTTCTGGAGGCAGAAGGCAAAGCTTAGGACCTAGAG	A	G	0.106094	0.00602859	0.893906	0.00602859	0.0154185	0.00291339	0.181351	0.00291339	0.803231	0.00291339	1362	2	0.171688	0.181351	0.189676	2.62383	0.10527	0.1171	21	247	1094	0.868991	9	104684062	90889		35	19	intron	A/G	0.13875	0.223883	YES	2	2	2	1	reference
ABCA1_rs2472495	ABCA1	http://www.ncbi.nlm.nih.gov/entrez/query.fcgi?db=gene&cmd=Retrieve&dopt=full_report&list_uids=19	rs2472495		http://www.ncbi.nlm.nih.gov/SNP/snp_ref.cgi?rs=2472495	A	G	TAGACACAGAAACAAATCGAGCAATCAATGGTCAAATAAAAATGTACCAGGAACCATCATTATTTGTGCAGTAGACCATGTATTGCAGAGGCTCTCAATCAATTCAATTTAATTGGACCA[A/G]TGTGATCCTCTTCTGTATTAATGTGGCTCCTGTTGACATGCAAGCAAGATTCAAAATTATTATTGCTTCTGGACTTGAGTAAGATGTTTGTTCTGTTTGTCATTGGGATCAAGAGGTTAG	CTAACCTCTTGATCCCAATGACAAACAGAACAAACATCTTACTCAAGTCCAGAAGCAATAATAATTTTGAATCTTGCTTGCATGTCAACAGGAGCCACATTAATACAGAAGAGGATCACA[C/T]TGGTCCAATTAAATTGAATTGATTGAGAGCCTCTGCAATACATGGTCTACTGCACAAATAATGATGGTTCCTGGTACATTTTTATTTGACCATTGATTGCTCGATTTGTTTCTGTGTCTA	C	T	0.776432	0.00804873	0.223568	0.00804873	0.605727	0.00477113	0.34141	0.00477113	0.0528634	0.00477113	1362	2	0.286907	0.34141	0.347171	0.375089	0.540243	0.538	825	465	72	0.880768	9	104774951			35	19	locus-region, 5'	C/T	0.329861	0.236901	YES	1	1	1	1	reference
ABCA1_rs2472510	ABCA1	http://www.ncbi.nlm.nih.gov/entrez/query.fcgi?db=gene&cmd=Retrieve&dopt=full_report&list_uids=19	rs2472510		http://www.ncbi.nlm.nih.gov/SNP/snp_ref.cgi?rs=2472510	A	C	AGGCAAGTTGCTGATCACTCTTTGCCTCAGTTTCATCATCTGTAAAATAGGTATTTGTGTTTGTGTATAATGTGAACCGTATAATATAATGCTTGGCCTATAGTGAAATTTATTCATACG[A/C]GTGTTTTCAGTGATTTTAAAAGCTTGCTTTAGGCCGGGCGCGATGGCTTCTGCCTATAATTCCAGCACTTTGGGAGGCCAAGGTGGGCGGATCATGAGGTCAGGAGTTCGAGACCAGCCT	aggcaagttgctgatcactctttgcctcagtttcatcatctgtaaaataggtatTTGTGTTTGTGTATAATGTGAACCGTATAATATAATGCTTGGCCTATAGTGAAATTTATTCATACG[C/A]GTGTTTTCAGTGATTTTAAAAGCTTGCTTTAggccgggcgcgatggcttctgcctataattccagcactttgggaggccaaggtgggcggatcatgaggtcaggagttcgagaccagcct	C	A	0.731278	0.00861405	0.268722	0.00861405	0.540382	0.00540478	0.381791	0.00540478	0.0778267	0.00540478	1362	2	0.315788	0.381791	0.393021	1.11198	0.291651	0.2972	736	520	106	0.944768	9	104762677	-143770		35	19	mrna-utr	A/C	0.381549	0.212591	YES	2	2	2	1	reference
ABCA1_rs2482430	ABCA1	http://www.ncbi.nlm.nih.gov/entrez/query.fcgi?db=gene&cmd=Retrieve&dopt=full_report&list_uids=19	rs2482430		http://www.ncbi.nlm.nih.gov/SNP/snp_ref.cgi?rs=2482430	A	G	CCTTTGGGACTTCTGTGGCAGGGTGTGGAACCAAATCAGATTGGTTGCATATCTGTTTCTCTTCCTGAAAATACAATTCAAATACCTTCATAGTCTGTGACAGCAACTTATAACCAACAG[A/G]CAATGGTATTATTTTTATTTATTGATGGCACTCCCCCATAGCCAGAACTTCTACTGAGTCATTCATCGTGTATTCCAGGAATACTTTCCAAATGGAGTAGTGAGGCACTTCCAATAACAG	CTGTTATTGGAAGTGCCTCACTACTCCATTTGGAAAGTATTCCTGGAATACACGATGAATGACTCAGTAGAAGTTCTGGCTATGGGGGAGTGCCATCAATAAATAAAAATAATACCATTG[T/C]CTGTTGGTTATAAGTTGCTGTCACAGACTATGAAGGTATTTGAATTGTATTTTCAGGAAGAGAAACAGATATGCAACCAATCTGATTTGGTTCCACACCCTGCCACAGAAGTCCCAAAGG	T	C	0.174743	0.00728358	0.825257	0.00728358	0.030837	0.00391949	0.287812	0.00391949	0.681351	0.00391949	1362	2	0.246824	0.287812	0.288416	0.00596852	0.93842	0.9265	42	392	928	0.856686	9	104618907	3820		35	19	locus-region	C/T	0.309861	0.242727	YES	2	2	2	1	reference
ABCA1_rs2482432	ABCA1	http://www.ncbi.nlm.nih.gov/entrez/query.fcgi?db=gene&cmd=Retrieve&dopt=full_report&list_uids=19	rs2482432		http://www.ncbi.nlm.nih.gov/SNP/snp_ref.cgi?rs=2482432	A	G	TCTACAGAAATTTACTTTTGTGCATTTGTGGCACCACCTACTGTTGAAGGGTTATAAAGCCATTAGAAAAGTAGAGGGGAAGTGATTTGGATCAAAAGGAAAAACTTTAGAAAAGATTCA[A/G]ATGTTCCCTTAATCATAAAAGAGAACTGAGGGGACTACTTGAAAATAAAAGGTTGTTTTGTATTTTCATGTTGGTTAAGATACTGAGTAACTGGTATTAAGTGTTAGAGGTTTTTAGATA	TATCTAAAAACCTCTAACACTTAATACCAGTTACTCAGTATCTTAACCAACATGAAAATACAAAACAACCTTTTATTTTCAAGTAGTCCCCTCAGTTCTCTTTTATGATTAAGGGAACAT[T/C]TGAATCTTTTCTAAAGTTTTTCCTTTTGATCCAAATCACTTCCCCTCTACTTTTCTAATGGCTTTATAACCCTTCAACAGTAGGTGGTGCCACAAATGCACAAAAGTAAATTTCTGTAGA	T	C	0.547724	0.00968211	0.452276	0.00968211	0.307636	0.006713	0.480176	0.006713	0.212188	0.006713	1362	2	0.372712	0.480176	0.495445	1.29356	0.255393	0.2513	419	654	289	0.947254	9	104622727	143233		35	19	locus-region	C/T	0.48875	0.0741514	YES	2	2	2	1	reference
ABCA1_rs2487052	ABCA1	http://www.ncbi.nlm.nih.gov/entrez/query.fcgi?db=gene&cmd=Retrieve&dopt=full_report&list_uids=19	rs2487052		http://www.ncbi.nlm.nih.gov/SNP/snp_ref.cgi?rs=2487052	A	G	ATGTTAAAAGATCATTCTGAACACTTGTTTTGTTTATGCTGAGAGAAGGCCTACTCCAAAAAATGCAACCATCTTCGTATCTGCATGTGGATACAACCATGAATGGCCAAAGTTATTGCA[A/G]TGTTGAATAGACACTTATATAGCACTGTGTGGCAAGTACTGTTTGAAATGTTTTTCACGTGTTTATTCATTGTATTTATTTTGAGATAGGGTCTTGCTCTGTTGCACAGGGTGGAGTGCA	tgcactccaccctgtgcaacagagcaagaccctatctcaaaataaatacaatgaataaaCACGTGAAAAACATTTCAAACAGTACTTGCCACACAGTGCTATATAAGTGTCTATTCAACA[C/T]TGCAATAACTTTGGCCATTCATGGTTGTATCCACATGCAGATACGAAGATGGTTGCATTTTTTGGAGTAGGCCTTCTCTCAGCATAAACAAAACAAGTGTTCAGAATGATCTTTTAACAT	C	T	0.214023	0.00795402	0.785977	0.00795402	0.0499266	0.00466405	0.328194	0.00466405	0.62188	0.00466405	1362	2	0.279841	0.328194	0.336435	0.817221	0.365994	0.3741	68	447	847	0.969606	9	104765960	-81683		35	19	mrna-utr	C/T	0.32	0.24	YES	1	1	1	1	reference
ABCA1_rs2487054	ABCA1	http://www.ncbi.nlm.nih.gov/entrez/query.fcgi?db=gene&cmd=Retrieve&dopt=full_report&list_uids=19	rs2487054		http://www.ncbi.nlm.nih.gov/SNP/snp_ref.cgi?rs=2487054	A	C	TTGCCTTTTGTTGCTTATTGGAACAGCCCTAGAGATTTTTAAATAACAGTGAGTCAAAACACTCACTTCTCTTTCCACAGGCAGCCTCACCACCAACCCACCACTCCCCAATCAAAAAAA[A/C]AAATTTCTTCCCACATAAAGCCAGCAAATCTTTCTAAAGAAGCACCATAAATTATTGAGTTATTCCAAACTATTGACTCTTCCCAGCACCCGTTTCAGGGGTAAACTCTTACTCTTTCTC	TTGCCTTTTGTTGCTTATTGGAACAGCCCTAGAGATTTTTAAATAACAGTGAGTCAAAACACTCACTTCTCTTTCCACAGGCAGCCTCACCACCAACCCACCACTCCCCAATCAAAAAAA[A/C]AAATTTCTTCCCACATAAAGCCAGCAAATCTTTCTAAAGAAGCACCATAAATTATTGAGTTATTCCAAACTATTGACTCTTCCCAGCACCCGTTTCAGGGGTAAACTCTTACTCTTTCTC	A	C	0.587372	0.00957588	0.412628	0.00957588	0.352423	0.00657683	0.469897	0.00657683	0.17768	0.00657683	1362	2	0.36725	0.469897	0.484732	1.27574	0.258693	0.2673	480	640	242	0.881947	9	104684277	79596		35	19	intron	A/C	0.483194	0.090113	YES	2	2	2	1	reference
ABCA1_rs2515614	ABCA1	http://www.ncbi.nlm.nih.gov/entrez/query.fcgi?db=gene&cmd=Retrieve&dopt=full_report&list_uids=19	rs2515614		http://www.ncbi.nlm.nih.gov/SNP/snp_ref.cgi?rs=2515614	A	C	CAAGTCTAATGGAAGTAAAGAGAAGGGGATCTTACTTTCAACTTAGTGATGGGAARGAGTGGATCCAGAAGAGCTTCATGAGGAGGGARGCATTTAAATCGGGTCTTAAAGGAGGTTTGC[A/C]AAAGCTAAAGGGTTTTGTACCAACTTTGTTTTCAACATGGGAAAGACAGGATTTCAAACTTTATTTTGTTTTAGGAACCAAATCCAGTGCTCCTCCATTGTTGGAATAAATGCTCTTTGC	GCAAAGAGCATTTATTCCAACAATGGAGGAGCACTGGATTTGGTTCCTAAAACAAAATAAAGTTTGAAATCCTGTCTTTCCCATGTTGAAAACAAAGTTGGTACAAAACCCTTTAGCTTT[T/G]GCAAACCTCCTTTAAGACCCGATTTAAATGCYTCCCTCCTCATGAAGCTCTTCTGGATCCACTCYTTCCCATCACTAAGTTGAAAGTAAGATCCCCTTCTCTTTACTTCCATTAGACTTG	T	G	0.66373	0.00906653	0.33627	0.00906653	0.441263	0.0060524	0.444934	0.0060524	0.113803	0.0060524	1362	2	0.346755	0.444934	0.446385	0.0143946	0.904501	0.9014	601	606	155	0.891542	9	104763873	-2323		35	19	mrna-utr	G/T	0.42	0.183303	YES	2	2	2	1	reference
ABCA1_rs2515616	ABCA1	http://www.ncbi.nlm.nih.gov/entrez/query.fcgi?db=gene&cmd=Retrieve&dopt=full_report&list_uids=19	rs2515616		http://www.ncbi.nlm.nih.gov/SNP/snp_ref.cgi?rs=2515616	A	G	ATAACGAGACTCCATCTCAAAAAAAAAAGCAAAACCTACACCCAAAATGATGTCCGAGATGGAGAGTCCAATTTTATTTTAGAGAGATTTTCCAAATGGTGAGTCAGAAGCAAGAACAGT[A/G]TCTCACTAAATCATGTTTACTCAACTGAAACTTATTGAATTAAACCAACTCCTCCTTCCTTTGCATTTCAGATGAGAACCCCTTCTGGTTCTATGATTCAAATCTTCATTCACTCAAAGC	GCTTTGAGTGAATGAAGATTTGAATCATAGAACCAGAAGGGGTTCTCATCTGAAATGCAAAGGAAGGAGGAGTTGGTTTAATTCAATAAGTTTCAGTTGAGTAAACATGATTTAGTGAGA[C/T]ACTGTTCTTGCTTCTGACTCACCATTTGGAAAATCTCTCTAAAATAAAATTGGACTCTCCATCTCGGACATCATTTTGGGTGTAGGttttgcttttttttttgagatggagtctcgttat	C	T	0.202643	0.00777264	0.797357	0.00777264	0.0440529	0.00446522	0.317181	0.00446522	0.638767	0.00446522	1362	2	0.270942	0.317181	0.323158	0.465957	0.494853	0.5044	60	432	870	0.907785	9	104761550	-87631		35	19	mrna-utr	C/T	0.406111	0.195267	YES	2	2	2	1	reference
ABCA1_rs2515629	ABCA1	http://www.ncbi.nlm.nih.gov/entrez/query.fcgi?db=gene&cmd=Retrieve&dopt=full_report&list_uids=19	rs2515629		http://www.ncbi.nlm.nih.gov/SNP/snp_ref.cgi?rs=2515629	A	G	TTTCCAACCTTCAACCAAGAATGAAGGATTTTGGTTTTTCACTGCAATTTAAGAGAAATTCTAAGAGTAATTTAGGGATATGTTATTTATTGATTTTGTGGAGGAAAAGAGGTTAAAACA[A/G]TGATCTTATCTTACTTTTCTGTTTTCTTAGCAATTCTGAGTCATAGCAACTAACCAACCAACCAGACCAAAACACCTCTTACCCATCCCTACTAATATAATTTTTAATATAAAATTTCAA	ttgaaattttatattaaaaattatattaGTAGGGATGGGTAAGAGGTGTTTTGGTCTGGTTGGTTGGTTAGTTGCTATGACTCAGAATTGCTAAGAAAACAGAAAAGTAAGATAAGATCA[C/T]TGTTTTAACCTCTTTTCCTCCACAAAATCAATAAATAACATATCCCTAAATTACTCTTAGAATTTCTCTTAAATTGCAGTGAAAAACCAAAATCCTTCATTCTTGGTTGAAGGTTGGAAA	C	T	0.82489	0.00748705	0.17511	0.00748705	0.688693	0.00422216	0.272394	0.00422216	0.0389134	0.00422216	1362	2	0.247164	0.272394	0.288893	4.44273	0.0350502	0.0384	938	371	53	0.953117	9	104673919	72715		35	19	intron	C/T	0.21875	0.248039	YES	2	2	2	1	reference
ABCA1_rs2575878	ABCA1	http://www.ncbi.nlm.nih.gov/entrez/query.fcgi?db=gene&cmd=Retrieve&dopt=full_report&list_uids=19	rs2575878		http://www.ncbi.nlm.nih.gov/SNP/snp_ref.cgi?rs=2575878	A	G	TTCTTGCCCTAGCATGGCAAACAGTCCTCCAAGGAGGCACCTGTGACACCCAACGGAGTAGGGGGGCGGTGTGTTCAGGTGCAGGTGGAACAAGGCCAGAAGTGTGCATATGTGCTGACC[A/G]TGGGAGCTTGTTTGTCGGTTTCACAGTTGATGCCCTGAGCCTGCCATAGCAGACTTGTTTCTCCATGGGATGCTGTTTTCTTTCCAGAGACACAGCGCTAGGGTTGTCCTCATTACCTGA	TCAGGTAATGAGGACAACCCTAGCGCTGTGTCTCTGGAAAGAAAACAGCATCCCATGGAGAAACAAGTCTGCTATGGCAGGCTCAGGGCATCAACTGTGAAACCGACAAACAAGCTCCCA[T/C]GGTCAGCACATATGCACACTTCTGGCCTTGTTCCACCTGCACCTGAACACACCGCCCCCCTACTCCGTTGGGTGTCACAGGTGCCTCCTTGGAGGACTGTTTGCCATGCTAGGGCAAGAA	T	C	0.415198	0.00951524	0.584802	0.00951524	0.176211	0.00658456	0.477974	0.00658456	0.345815	0.00658456	1362	2	0.367705	0.477974	0.485617	0.337444	0.561308	0.579	240	651	471	0.892031	9	104746634	-103642		35	19	mrna-utr	C/T	0.5		YES	2	2	2	1	reference
ABCA1_rs2740479	ABCA1	http://www.ncbi.nlm.nih.gov/entrez/query.fcgi?db=gene&cmd=Retrieve&dopt=full_report&list_uids=19	rs2740479		http://www.ncbi.nlm.nih.gov/SNP/snp_ref.cgi?rs=2740479	A	G	TCTCACCTAAAAATGGGAAACCTGAGACACAGAGAAATGAAGTGAGTACTTATCAGGTCCTACAGACCAGCTTGCCAGCTTAAAAAAAAAAAAGATTCATTTCCTATTTAGTCAGTGATT[A/G]TTTCAGCAAAGTATGTTTGAAACCCAGTTTATTTACCAACTGACCAAATTTGTAAACCTGGTTGTTCTGAGAGCTTTTTTTGAGATGGAGTCTTGCTCTGTCGCCCAGGCTGGAGTGCAG	ctgcactccagcctgggcgacagagcaagactccatctcaaaaaaaGCTCTCAGAACAACCAGGTTTACAAATTTGGTCAGTTGGTAAATAAACTGGGTTTCAAACATACTTTGCTGAAA[T/C]AATCACTGACTAAATAGGAAATGAATCTTTTTTTTTTTTAAGCTGGCAAGCTGGTCTGTAGGACCTGATAAGTACTCACTTCATTTCTCTGTGTCTCAGGTTTCCCATTTTTAGGTGAGA	T	C	0.671806	0.00889574	0.328194	0.00889574	0.446402	0.00593698	0.450808	0.00593698	0.10279	0.00593698	1362	2	0.34374	0.450808	0.440965	0.678526	0.410095	0.4231	608	614	140	0.862186	9	104642992	-12257		35	19	intron	C/T	0.42	0.183303	YES	2	2	2	1	reference
ABCA1_rs2740484	ABCA1	http://www.ncbi.nlm.nih.gov/entrez/query.fcgi?db=gene&cmd=Retrieve&dopt=full_report&list_uids=19	rs2740484		http://www.ncbi.nlm.nih.gov/SNP/snp_ref.cgi?rs=2740484	A	G	CCCACCACCACATAAATTGTGTCTCTAGGTTCTGTGTTGCTCACACTCAAAATTTCTGGGCCTTCTCATTTGGTGCATGTGAATGGTGCATATGAGTGAAGTCTAGGATGGGGCCTTAGC[A/G]TTAAAGCCCTGGGGTAGTGTGACTGAGATTGTTGGTAAAGAATGTGCAGTGGTTGGCATGACCTCAGAAATTCTGAAATGGGACTGCACCTGCAGACTGAAGTGTTCAGAGAGCCAGGGA	CCCACCACCACATAAATTGTGTCTCTAGGTTCTGTGTTGCTCACACTCAAAATTTCTGGGCCTTCTCATTTGGTGCATGTGAATGGTGCATATGAGTGAAGTCTAGGATGGGGCCTTAGC[A/G]TTAAAGCCCTGGGGTAGTGTGACTGAGATTGTTGGTAAAGAATGTGCAGTGGTTGGCATGACCTCAGAAATTCTGAAATGGGACTGCACCTGCAGACTGAAGTGTTCAGAGAGCCAGGGA	A	G	0.345448	0.00905846	0.654552	0.00905846	0.11674	0.00611159	0.457416	0.00611159	0.425844	0.00611159	1362	2	0.349973	0.457416	0.452227	0.179272	0.672	0.7157	159	623	580	0.940873	9	104630735	114331		35	19	intron	A/G	0.464444	0.128505	YES	2	2	2	1	reference
ABCA1_rs2777793	ABCA1	http://www.ncbi.nlm.nih.gov/entrez/query.fcgi?db=gene&cmd=Retrieve&dopt=full_report&list_uids=19	rs2777793		http://www.ncbi.nlm.nih.gov/SNP/snp_ref.cgi?rs=2777793	A	G	CTCCGAATCGCCCCTGAGCACCCCACTTTTTCCTTTTGCTGCAGCCCTGGGAGCCACCTGGCTCTCCAAAAGCCCCTAATGGGCCCCTGTATTTCTGGAAGCTGTGGGTGAAGTGAGTTA[A/G]TGGCCCCACTCTTAGAGATCAATACTGGGTATCTTGGTGTCAATCTGGATTCTTTCCTTCAGGCCTGGAGGAATATAATAACTGAGACTTGTTTTATTTCTGCAGAGGGTTCTAAGCCAT	ATGGCTTAGAACCCTCTGCAGAAATAAAACAAGTCTCAGTTATTATATTCCTCCAGGCCTGAAGGAAAGAATCCAGATTGACACCAAGATACCCAGTATTGATCTCTAAGAGTGGGGCCA[C/T]TAACTCACTTCACCCACAGCTTCCAGAAATACAGGGGCCCATTAGGGGCTTTTGGAGAGCCAGGTGGCTCCCAGGGCTGCAGCAAAAGGAAAAAGTGGGGTGCTCAGGGGCGATTCGGAG	C	T	0.490455	0.0097093	0.509545	0.0097093	0.24743	0.0067692	0.48605	0.0067692	0.26652	0.0067692	1362	2	0.374909	0.48605	0.499818	1.03344	0.309351	0.3088	337	662	363	0.874996	9	104745066	-94136		35	19	intron	C/T	0.491111	0.0660714	YES	2	2	2	1	reference
ABCA1_rs2777805	ABCA1	http://www.ncbi.nlm.nih.gov/entrez/query.fcgi?db=gene&cmd=Retrieve&dopt=full_report&list_uids=19	rs2777805		http://www.ncbi.nlm.nih.gov/SNP/snp_ref.cgi?rs=2777805	A	G	TAAAAGGGGGTTTTGAAGGAAAGTACAATAAAAATATACAATTTGAGAAGAAGAAAGTGTCCCTTTTTATAAAAATTCATATGCCATCTTTTCAGATTATAAAAGCGAAGAAGCTGATAA[A/G]CAAAACCTAAAAATCATATATAATGAGAGCCTATTGAAGCACTTAAGTACAGGGGCTGGGAGAGAAAGAAAGGAAAAGCATTTCATCAGTAAGTGTAAAGTGCTATTTAAATTAAATATT	TAAAAGGGGGTTTTGAAGGAAAGTACAATAAAAATATACAATTTGAGAAGAAGAAAGTGTCCCTTTTTATAAAAATTCATATGCCATCTTTTCAGATTATAAAAGCGAAGAAGCTGATAA[G/A]CAAAACCTAAAAATCATATATAATGAGAGCCTATTGAAGCACTTAAGTACAGGGGCTGGGAGAGAAAGAAAGGAAAAGCATTTCATCAGTAAGTGTAAAGTGCTATTTAAATTAAATATT	G	A	0.767621	0.00816604	0.232379	0.00816604	0.592511	0.00490323	0.35022	0.00490323	0.0572687	0.00490323	1362	2	0.29312	0.35022	0.356758	0.457366	0.498857	0.4949	807	477	78	0.886267	9	104650930	111142		35	19	intron	A/G	0.255	0.24995	YES	2	2	2	1	reference
ABCA1_rs2791952	ABCA1	http://www.ncbi.nlm.nih.gov/entrez/query.fcgi?db=gene&cmd=Retrieve&dopt=full_report&list_uids=19	rs2791952		http://www.ncbi.nlm.nih.gov/SNP/snp_ref.cgi?rs=2791952	A	G	GGAACATTAAATTTTAGTTAAACTTTTTTTCAAATATGCATATAATTGTCAGTGGTTACTATATTTTGGGGAAGAGATTGTTGACTTCTTTGAAGAAAGATACGGATTTTCTCTTCAGAA[A/G]AAATACACATGGGCTCATATAATCCAAATTTTATGTGTAATTACAGGGTGTTCATGAATGCCCACAAATCCATTAAGCCATGTGACCTTGGACAAGTCATTTTACTTTTCTGTTTTTTAG	ctaaaaaacagaaaagtaaaatgacttgtccaaggtcacatggcttaatggATTTGTGGGCATTCATGAACACCCTGTAATTACACATAAAATTTGGATTATATGAGCCCATGTGTATTT[T/C]TTCTGAAGAGAAAATCCGTATCTTTCTTCAAAGAAGTCAACAATCTCTTCCCCAAAATATAGTAACCACTGACAATTATATGCATATTTGAAAAAAAGTTTAACTAAAATTTAATGTTCC	T	C	0.0947137	0.00560518	0.905286	0.00560518	0.00881057	0.00230664	0.171806	0.00230664	0.819383	0.00230664	1362	2	0.156782	0.171806	0.171486	0.00474881	0.94506	1	12	234	1116	0.930505	9	104762072	-17702		35	19	mrna-utr	C/T	0.206111	0.246117	YES	2	2	2	1	reference
ABCA1_rs3758294	ABCA1	http://www.ncbi.nlm.nih.gov/entrez/query.fcgi?db=gene&cmd=Retrieve&dopt=full_report&list_uids=19	rs3758294		http://www.ncbi.nlm.nih.gov/SNP/snp_ref.cgi?rs=3758294	A	G	TATTATAGTGTTACTTAAATATTAGGAAGTAAAAGTAGGTATAAACTTCTTTATAGGCTGTTATTATACAACTATATGACCCATACATATTTACAAATTAAGTGCAGCCAAAATTGCAAA[A/G]TCATACCATTCAAATTAATACCTTAAATGTGGTGAGGCAGCTGTTGTTCAACTGAAACCAAATTATAAGTTGCATGGCAGTAAATGCTATCATGCTGATCATTTTGAGTTTGGCCAGTCT	AGACTGGCCAAACTCAAAATGATCAGCATGATAGCATTTACTGCCATGCAACTTATAATTTGGTTTCAGTTGAACAACAGCTGCCTCACCACATTTAAGGTATTAATTTGAATGGTATGA[C/T]TTTGCAATTTTGGCTGCACTTAATTTGTAAATATGTATGGGTCATATAGTTGTATAATAACAGCCTATAAAGAAGTTTATACCTACTTTTACTTCCTAATATTTAAGTAACACTATAATA	C	T	0.779736	0.00797293	0.220264	0.00797293	0.609398	0.00468828	0.340675	0.00468828	0.0499266	0.00468828	1362	2	0.284501	0.340675	0.343496	0.091825	0.76187	0.753	830	464	68	0.929518	9	104744370	-86712		35	19	intron	C/T	0.397174	0.202088	YES	2	2	2	1	reference
ABCA1_rs3780541	ABCA1	http://www.ncbi.nlm.nih.gov/entrez/query.fcgi?db=gene&cmd=Retrieve&dopt=full_report&list_uids=19	rs3780541		http://www.ncbi.nlm.nih.gov/SNP/snp_ref.cgi?rs=3780541	A	C	TGGGCCCAAGTTGCTGAATTTCTAACAAGTTCCCAAGTGATCCTGATGCCGCTGTTCCTC[A/C]CACTGTACTTAAGTAAAGAGGCTCATTAAAGGGTAAATAAGTGCATAGGAGTTTAAGGTT	TgggcccaagttgctgaatttctaacaagttcccaagtgatcctgatgccgctgttccTC[A/C]CACTGTACTTAAGTAAAGAGGCTCATTAAAGGGTAAATAAGTGCATAGGAGTTTAAGGTT	A	C	0.921439	0.00514443	0.0785609	0.00514443	0.848752	0.00192142	0.145374	0.00192142	0.00587372	0.00192142	1362	2	0.134298	0.145374	0.144778	0.0230979	0.879203	1	1156	198	8	0.841138	9	104657658	10469		35	19	intron	A/C	0.13875	0.223883	YES	2	2	2	1	reference
ABCA1_rs3780543	ABCA1	http://www.ncbi.nlm.nih.gov/entrez/query.fcgi?db=gene&cmd=Retrieve&dopt=full_report&list_uids=19	rs3780543		http://www.ncbi.nlm.nih.gov/SNP/snp_ref.cgi?rs=3780543	A	G	AAGGCTCAGCAATCCTGTTCCCCCACACACATGCGCATACCCACAGTCTTCTGAGGCTCCCTGCTCAGCCAAGGATGGCTCAGGATCAGAGGTGCCTGTTTGGGGCTGCTGATGCCTATG[A/G]AGCCCAGACTGAGGCAACAGGAGCATCCTATGAGTCACTCTTAGCTTTCCTGATAAGTGACCTGGGGACATCTGACAACTTGCACTTGTAGGGGCTCACACACTCTCCAAGATATCCCCC	AAGGCTCAGCAATCCTGTTCCCCCACACACATGCGCATACCCACAGTCTTCTGAGGCTCCCTGCTCAGCCAAGGATGGCTCAGGATCAGAGGTGCCTGTTTGGGGCTGCTGATGCCTATG[A/G]AGCCCAGACTGAGGCAACAGGAGCATCCTATGAGTCACTCTTAGCTTTCCTGATAAGTGACCTGGGGACATCTGACAACTTGCACTTGTAGGGGCTCACACACTCTCCAAGATATCCCCC	A	G	0.881791	0.00622865	0.118209	0.00622865	0.779001	0.00293162	0.20558	0.00293162	0.0154185	0.00293162	1362	2	0.186741	0.20558	0.208471	0.261838	0.60886	0.6008	1061	280	21	0.915017	9	104668127	-7915		35	19	intron	A/G	0.231111	0.249285	YES	2	2	2	1	reference
ABCA1_rs3818688	ABCA1	http://www.ncbi.nlm.nih.gov/entrez/query.fcgi?db=gene&cmd=Retrieve&dopt=full_report&list_uids=19	rs3818688		http://www.ncbi.nlm.nih.gov/SNP/snp_ref.cgi?rs=3818688	A	G	GAGATTGAAAAGTAATGAGCAGGAACACCAGGTCATTTGTAGCCAAGGCTCTTACCTCTT[A/G]ACAAGTCTCTTTTCTTTGACATAATAATGTCCTCTAAGGACCTTCTCCATCACTCTCTGT	GAGATTGAAAAGTAATGAGCAGGAACACCAGGTCATTTGTAGCCAAGGCTCTTACCTCTT[A/G]ACAAGTCTCTTTTCTTTGACATAATAATGTCCTCTAAGGACCTTCTCCATCACTCTCTGT	A	G	0.0701625	0.00505434	0.929838	0.00505434	0.00886263	0.00229835	0.1226	0.00229835	0.868538	0.00229835	1354	2	0.121967	0.1226	0.130479	4.93805	0.0262717	0.0344	12	166	1176	0.859937	9	104660212	23728		35	19	intron	A/G	0.116219	0.211193	YES	2	2	2	1	reference
ABCA1_rs3824478	ABCA1	http://www.ncbi.nlm.nih.gov/entrez/query.fcgi?db=gene&cmd=Retrieve&dopt=full_report&list_uids=19	rs3824478		http://www.ncbi.nlm.nih.gov/SNP/snp_ref.cgi?rs=3824478	A	G	CCACCTCTGGAGAGCCTAGTTCCCTTCTGGAGGCAGAAGGCAAAGCTTAGGWCCTAGAGA[A/G]TGCTGGACCACGCCACTCACAGGAACCAGCAGGCTGTGAGGTTGAAAGCTAGGCATATGG	CCATATGCCTAGCTTTCAACCTCACAGCCTGCTGGTTCCTGTGAGTGGCGTGGTCCAGCA[T/C]TCTCTAGGWCCTAAGCTTTGCCTTCTGCCTCCAGAAGGGAACTAGGCTCTCCAGAGGTGG	T	C	0.0565345	0.00438363	0.943465	0.00438363	0.00220264	0.00123056	0.108664	0.00123056	0.889134	0.00123056	1362	2	0.100987	0.108664	0.106677	0.472542	0.49182	0.804	3	148	1211	0.87532	9	104683940	44134		35	19	intron	C/T	0.0487499	0.148319	YES	2	2	2	1	reference
ABCA1_rs3847301	ABCA1	http://www.ncbi.nlm.nih.gov/entrez/query.fcgi?db=gene&cmd=Retrieve&dopt=full_report&list_uids=19	rs3847301		http://www.ncbi.nlm.nih.gov/SNP/snp_ref.cgi?rs=3847301	A	G	GGTTGGAGTATGGATAGAAAAGAAAGAAAGACCCTATATTGAAATGCAAAGTGCAGCAAGTCCTGACTTTGGATTAACTTCTCAGCCCATTTGCATGAAAATAAAAAGATGAATAAAACA[A/G]GGTTCCCACTTTGGAGGGAGGTGGTAGCTGTGAGATGGAAGGAGTGTTCCTGCTGGGCAACAGCAGAGTAAGTGCTGGGGTAGATTCACTCCCACAGTGCCTGGAAAATCCTCATAGGCT	GGTTGGAGTATGGATAGAAAAGAAAGAAAGACCCTATATTGAAATGCAAAGTGCAGCAAGTCCTGACTTTGGATTAACTTCTCAGCCCATTTGCATGAAAATAAAAAGATGAATAAAACA[A/G]GGTTCCCACTTTGGAGGGAGGTGGTAGCTGTGAGATGGAAGGAGTGTTCCTGCTGGGCAACAGCAGAGTAAGTGCTGGGGTAGATTCACTCCCACAGTGCCTGGAAAATCCTCATAGGCT	A	G	0.872247	0.0065576	0.127753	0.0065576	0.76652	0.00337859	0.211454	0.00337859	0.0220264	0.00337859	1362	2	0.19803	0.211454	0.222865	3.57063	0.0588098	0.0687	1044	288	30	0.840871	9	104728074	-2510		35	19	intron	A/G	0.169061	0.236535	YES	2	2	2	1	reference
ABCA1_rs3904997	ABCA1	http://www.ncbi.nlm.nih.gov/entrez/query.fcgi?db=gene&cmd=Retrieve&dopt=full_report&list_uids=19	rs3904997		http://www.ncbi.nlm.nih.gov/SNP/snp_ref.cgi?rs=3904997	A	G	TATATTCATCTTTATACCAATGCAGTCATGAAATATAATTTTTAATATTTGTGTATGGAAGGGGCCCATGGAGGCTACAAAGCCAGTCTAGGGTCCATGAACATGACAGTGTGGCCCTGC[A/G]TGCCGCAGCTGCAGCTTCCTCAGGATTGTCCTGAGCCACATCCCATCGTCCTTACTCCGTCCTAACTCACATCACGGTCCTGTGCATTTGAAGAATCCTCAATGTCTCATTTGGGGGACA	tgtcccccaaatgaGACATTGAGGATTCTTCAAATGCACAGGACCGTGATGTGAGTTAGGACGGAGTAAGGACGATGGGATGTGGCTCAGGACAATCCTGAGGAAGCTGCAGCTGCGGCA[T/C]Gcagggccacactgtcatgttcatggaccctagactggctttgtagcctccatgggccccttccatacacaaatattaaaaattatatttcatgactgcattggtataaagatgaatata	T	C	0.221733	0.00768427	0.778267	0.00768427	0.0374449	0.00437016	0.368576	0.00437016	0.593979	0.00437016	1362	2	0.285576	0.368576	0.345135	6.28276	0.0121918	0.0096	51	502	809	0.92378	9	104725564	-19620		35	19	intron	C/T	0.266528	0.249453	YES	2	2	2	1	reference
ABCA1_rs4149281	ABCA1	http://www.ncbi.nlm.nih.gov/entrez/query.fcgi?db=gene&cmd=Retrieve&dopt=full_report&list_uids=19	rs4149281		http://www.ncbi.nlm.nih.gov/SNP/snp_ref.cgi?rs=4149281	A	G	CAGATACTTTTGGAACCTTGTCAGCCCTAATCCCATCTCCTAGTGTTTAGTATTCAGCTACCCTTCACTGGGCAGTAATTCTGTGCCAGGCCTGATCTGGGCATTGGTGGTACTAAGAAC[A/G]CATATTCCCTATCCTATAGGCATAGTCTGGTAGAGACAACATGCAAGTAAAACAATGTTCCTTAAACTGTGGTTCCACACCTCCCTCCCCCAACATTAAAAGTGTAAGGGATGCTTATTC	CAGATACTTTTGGAACCTTGTCAGCCCTAATCCCATCTCCTAGTGTTTAGTATTCAGCTACCCTTCACTGGGCAGTAATTCTGTGCCAGGCCTGATCTGGGCATTGGTGGTACTAAGAAC[A/G]CATATTCCCTATCCTATAGGCATAGTCTGGTAGAGACAACATGCAAGTAAAACAATGTTCCTTAAACTGTGGTTCCACACCTCCCTCCCCCAACATTAAAAGTGTAAGGGATGCTTATTC	A	G	0.13326	0.00646623	0.86674	0.00646623	0.0161527	0.00302636	0.234214	0.00302636	0.749633	0.00302636	1362	2	0.204322	0.234214	0.231003	0.263157	0.60796	0.719	22	319	1021	0.927518	9	104705944	-14562		35	19	intron	A/G	0.124444	0.216185	YES	2	2	2	1	reference
ABCA1_rs4149290	ABCA1	http://www.ncbi.nlm.nih.gov/entrez/query.fcgi?db=gene&cmd=Retrieve&dopt=full_report&list_uids=19	rs4149290		http://www.ncbi.nlm.nih.gov/SNP/snp_ref.cgi?rs=4149290	A	G	GCCTGATTGTGTAACTCCAACCAATATTCCTTTGAAAATGGAAATTTGTTTATATTGWCT[A/G]CAGATTGCCAATATTATTAGTAAATGCTGAGCACTTAATCTCGAATAAAGAACTAGTTTA	GCCTGATTGTGTAACTCCAACCAATATTCCTTTGAAAATGGAAATTTGTTTATATTGWCT[A/G]CAGATTGCCAATATTATTAGTAAATGCTGAGCACTTAATCTCGAATAAAGAACTAGTTTA	A	G	0.885463	0.00614867	0.114537	0.00614867	0.785609	0.00286936	0.199706	0.00286936	0.0146843	0.00286936	1362	2	0.182266	0.199706	0.202837	0.324509	0.568911	0.5923	1070	272	20	0.962522	9	104691382	-30520		35	19	intron	A/G	0.124444	0.216185	YES	2	2	2	1	reference
ABCA1_rs4149316	ABCA1	http://www.ncbi.nlm.nih.gov/entrez/query.fcgi?db=gene&cmd=Retrieve&dopt=full_report&list_uids=19	rs4149316		http://www.ncbi.nlm.nih.gov/SNP/snp_ref.cgi?rs=4149316	A	G	CACAATGCCTGGCATATAGCAAGTTCCCAAATAAAATGCTACTGTTCTTACCTCTGTGAGGATGTGGTACCTATATATACAAAGCTTTGCCATTCTAGGG[A/G]TCATAGCCATACAGGGTGAAAGGTGGCTTCCAGGTCTCTTCCAGTGCTTACCCCTGCTAATATCTCTCTAGTCCCTGTCACTGTGACAAATCAGAACTGA	CACAATGCCTGGCATATAGCAAGTTCCCAAATAAAATGCTACTGTTCTTACCTCTGTGAGGATGTGGTACCTATATATACAAAGCTTTGCCATTCTAGGG[A/G]TCATAGCCATACAGGGTGAAAGGTGGCTTCCAGGTCTCTTCCAGTGCTTACCCCTGCTAATATCTCTCTAGTCCCTGTCACTGTGACAAATCAGAACTGA	A	G	0.0796623	0.00519721	0.920338	0.00519721	0.00660793	0.0020205	0.146109	0.0020205	0.847283	0.0020205	1362	2	0.135882	0.146109	0.146632	0.0173738	0.895135	0.8532	9	199	1154	0.885371	9	104660862	25905		35	19	intron	A/G	0.0958253	0.1968	YES	2	2	2	1	reference
ABCA1_rs914544	ABCA1	http://www.ncbi.nlm.nih.gov/entrez/query.fcgi?db=gene&cmd=Retrieve&dopt=full_report&list_uids=19	rs914544		http://www.ncbi.nlm.nih.gov/SNP/snp_ref.cgi?rs=914544	A	G	ACCCCTAATTCAGCCCTTTCCCTTGAAAGCATCTGGCTTCTGAGGTTCAACTATGGGAATATGGTCTCTTAATGAACATTAAGTTGAGTTTGCCTTTTAGGTCCACATGTTGACAAATGT[A/G]TCAGAGTAATCTCTGTCCTAGGATCAGAGGGCCTGTAGGCACTTGCAAAAGCAGTTAGCTCTGACTCCCAGCCAGTGCACACTCCACCTTTCTGACTCCCAGCCTTGTCTCAAATTAGGC	GCCTAATTTGAGACAAGGCTGGGAGTCAGAAAGGTGGAGTGTGCACTGGCTGGGAGTCAGAGCTAACTGCTTTTGCAAGTGCCTACAGGCCCTCTGATCCTAGGACAGAGATTACTCTGA[C/T]ACATTTGTCAACATGTGGACCTAAAAGGCAAACTCAACTTAATGTTCATTAAGAGACCATATTCCCATAGTTGAACCTCAGAAGCCAGATGCTTTCAAGGGAAAGGGCTGAATTAGGGGT	C	T	0.955947	0.00390977	0.0440529	0.00390977	0.913363	0.00100678	0.0851689	0.00100678	0.00146843	0.00100678	1362	2	0.0806775	0.0851689	0.0842244	0.171262	0.678993	1	1244	116	2	0.973237	9	104686767	-82744204		35	19	intron	C/T	0.131825	0.220306	YES	2	2	2	1	reference
ABCC9_rs10841907	ABCC9	http://www.ncbi.nlm.nih.gov/entrez/query.fcgi?db=gene&cmd=Retrieve&dopt=full_report&list_uids=10060	rs10841907		http://www.ncbi.nlm.nih.gov/SNP/snp_ref.cgi?rs=10841907	A	C	TTGGAAGGAGTTTTATCTTCCAGCAATGCACCACTAACATAGTGTCAAAATGCTAGAAGACAGGATGATCAAGATTCACTTGCTTATATTGTACTACTCTAAGTTGGTGACCCCTTCAAT[A/C]CATCCTTCTCTTCAGGGGACTGAAATTCTCATAAGAAGGATGGATGTAGCCAAGAATAATAACAATAACAACAACAACAACAAAGATATATTGAGAGTATACTTAGCCAATTATTGCCAT	ATGGCAATAATTGGCTAAGTATACTCTCAATATATCTTTGTTGTTGTTGTTGTTATTGTTATTATTCTTGGCTACATCCATCCTTCTTATGAGAATTTCAGTCCCCTGAAGAGAAGGATG[T/G]ATTGAAGGGGTCACCAACTTAGAGTAGTACAATATAAGCAAGTGAATCTTGATCATCCTGTCTTCTAGCATTTTGACACTATGTTAGTGGTGCATTGCTGGAAGATAAAACTCCTTCCAA	T	G	0.820852	0.00727902	0.179148	0.00727902	0.671072	0.00387916	0.299559	0.00387916	0.0293686	0.00387916	1362	2	0.250859	0.299559	0.294108	0.467873	0.493967	0.5817	914	408	40	0.752681	12	21942563	-11255		35	10060	intron	G/T			YES	1	1	1	1	reference
ABCC9_rs1352909	ABCC9	http://www.ncbi.nlm.nih.gov/entrez/query.fcgi?db=gene&cmd=Retrieve&dopt=full_report&list_uids=10060	rs1352909		http://www.ncbi.nlm.nih.gov/SNP/snp_ref.cgi?rs=1352909	A	G	ATTTTCTTCACACAGTGAAACTATGTTACTGTTTTAATTTGCTTATCAATTCCTGCCTCAAGAAAGCGAATTCTGTGACAGGAAGGATATCACATGTCTTGTTCATTGCTACAACCCTAA[A/G]TCTTGGCACAAAGCACAGGGCAGCCAAAAAATAAAAAACACAGTCATATATTTAAATAAAGCTTATTCATATTACATGTAATGCATGACAAAATAATATTGACTATGTTTCTAGATTTTA	TAAAATCTAGAAACATAGTCAATATTATTTTGTCATGCATTACATGTAATATGAATAAGCTTTATTTAAATATATGACTGTGTTTTTTATTTTTTGGCTGCCCTGTGCTTTGTGCCAAGA[T/C]TTAGGGTTGTAGCAATGAACAAGACATGTGATATCCTTCCTGTCACAGAATTCGCTTTCTTGAGGCAGGAATTGATAAGCAAATTAAAACAGTAACATAGTTTCACTGTGTGAAGAAAAT	T	C	0.775533	0.00786822	0.224467	0.00786822	0.595885	0.00458276	0.359295	0.00458276	0.04482	0.00458276	1361	2	0.287555	0.359295	0.348163	1.39115	0.238211	0.2682	811	489	61	0.601813	12	21931308	-3062		35	10060	intron	C/T	0.461859	0.132724	YES	2	2	2	1	reference
ABCC9_rs1388698	ABCC9	http://www.ncbi.nlm.nih.gov/entrez/query.fcgi?db=gene&cmd=Retrieve&dopt=full_report&list_uids=10060	rs1388698		http://www.ncbi.nlm.nih.gov/SNP/snp_ref.cgi?rs=1388698	A	G	TCGGTGGTCAAGGCTGCAGTGAGCTGTGTTCATGCCACTGCACTCCAGCCTGGGGGACAGAGTGAGACTCTGTTTCAAAAAAAAAAAAAAGTTAATTATTTATGTTGAAATACTGACTCA[A/G]TATGTTTCTGGAAGAAATTTTGAGCTTTAAAATTTTTCCAGATTAGAGGTTTATGAGCTAAATATTCTACTTTCTCTTTAGCCATTTATCTCTGTGTGAAACTGAACCAAAAAATTAGAG	tcggtggtcaaggctgcagtgagctgtgttcatgccactgcactccagcctgggggacagagtgagactctgtttcaaaaaaaaaaaaaaGTTAATTATTTATGTTGAAATACTGACTCA[G/A]TATGTTTCTGGAAGAAATTTTGAGCTTTAAAATTTTTCCAGATTAGAGGTTTATGAGCTAAATATTCTACTTTCTCTTTAGCCATTTATCTCTGTGTGAAACTGAACCAAAAAATTAGAG	G	A	0.564244	0.00943483	0.435756	0.00943483	0.314978	0.00665854	0.498532	0.00665854	0.18649	0.00665854	1362	2	0.370839	0.498532	0.491745	0.25938	0.610547	0.66	429	679	254	0.953355	12	21928246	53660		35	10060	intron	A/G	0.400044	0.199967	YES	2	2	2	1	reference
ABCC9_rs17335932	ABCC9	http://www.ncbi.nlm.nih.gov/entrez/query.fcgi?db=gene&cmd=Retrieve&dopt=full_report&list_uids=10060	rs17335932		http://www.ncbi.nlm.nih.gov/SNP/snp_ref.cgi?rs=17335932	A	G	GACATGACCGCTTTACTGGTTGGCAAGTTACTGAACTTATCTGGACCTCAGTATCCTCCATTGTAAAAGATGAATTACAAGGTTGTTCTGAGGATTTAAG[A/G]TATGCAAAGTGCCCAGAACTTAAATAAGTAGTAGGCATTATAAAATAAGTTTTCAGAATGTCAAAGCTTTTCCTGGAATTTCACAGCAGTATTTTCATGG	CCATGAAAATACTGCTGTGAAATTCCAGGAAAAGCTTTGACATTCTGAAAACTTATTTTATAATGCCTACTACTTATTTAAGTTCTGGGCACTTTGCATA[T/C]CTTAAATCCTCAGAACAACCTTGTAATTCATCTTTTACAATGGAGGATACTGAGGTCCAGATAAGTTCAGTAACTTGCCAACCAGTAAAGCGGTCATGTC	T	C	0.964023	0.00353928	0.0359765	0.00353928	0.928781	0.000727147	0.0704846	0.000727147	0.000734214	0.000727147	1362	2	0.0669587	0.0704846	0.0693644	0.355211	0.551178	1	1265	96	1	0.904128	12	21981906			35	10060	locus-region	C/T	0.0139853	0.0824441	NO	2	2	2	1	reference
ABCC9_rs1873638	ABCC9	http://www.ncbi.nlm.nih.gov/entrez/query.fcgi?db=gene&cmd=Retrieve&dopt=full_report&list_uids=10060	rs1873638		http://www.ncbi.nlm.nih.gov/SNP/snp_ref.cgi?rs=1873638	A	G	CTTCTTTCTTGAGATTTTCTGTCAATAGCAGTGACATGGCTTTGGAAAGTTAAAACTAGGCATAAAGAGGAAGGGAGGGGAAAGATAGCCACAGAAAGCAATGATATCATGTTTTCTCCC[A/G]TTTCCATTATGGCTCTGAGTCCATGAATTAGAGTTGGTGAAATCTGTGTGAAGAAATCCTGCTTGCCTCTTCTAATTTATGTCCAATGAAGTGACCTTCTTTATATCATTTTGGTTGCAT	ATGCAACCAAAATGATATAAAGAAGGTCACTTCATTGGACATAAATTAGAAGAGGCAAGCAGGATTTCTTCACACAGATTTCACCAACTCTAATTCATGGACTCAGAGCCATAATGGAAA[C/T]GGGAGAAAACATGATATCATTGCTTTCTGTGGCTATCTTTCCCCTCCCTTCCTCTTTATGCCTAGTTTTAACTTTCCAAAGCCATGTCACTGCTATTGACAGAAAATCTCAAGAAAGAAG	C	T	0.78928	0.00778833	0.21072	0.00778833	0.62188	0.00447683	0.334802	0.00447683	0.0433186	0.00447683	1362	2	0.277311	0.334802	0.332634	0.0578656	0.809902	0.8724	847	456	59	0.917508	12	21870200	66838		35	10060	intron	C/T	0.282072	0.247934	YES	2	2	2	1	reference
ABCC9_rs2292772	ABCC9	http://www.ncbi.nlm.nih.gov/entrez/query.fcgi?db=gene&cmd=Retrieve&dopt=full_report&list_uids=10060	rs2292772		http://www.ncbi.nlm.nih.gov/SNP/snp_ref.cgi?rs=2292772	A	G	GCCTTTAAATATATGAAGTATCATGTTGCAATTGACGGAAACATAGAACATCATTTGTAAGACTTTTAAAATGAGATAATTGTGCTGGTGTCTATATCTT[A/G]CTGAGAAAACTAGAATTTATTATTCAAAATACCAGAATCTTCAGTTTTAAGCCAATAGTTTGCATTTGCTTAACAATCACTTAATGCCCAATAAAATTAA	GCCTTTAAATATATGAAGTATCATGTTGCAATTGACGGAAACATAGAACATCATTTGTAAGACTTTTAAAATGAGATAATTGTGCTGGTGTCTATATCTT[G/A]CTGAGAAAACTAGAATTTATTATTCAAAATACCAGAATCTTCAGTTTTAAGCCAATAGTTTGCATTTGCTTAACAATCACTTAATGCCCAATAAAATTAA	G	A	0.676211	0.00901349	0.323789	0.00901349	0.459618	0.00595048	0.433186	0.00595048	0.107195	0.00595048	1362	2	0.342021	0.433186	0.437899	0.15774	0.691246	0.7116	626	590	146	0.876133	12	21937038	-40768		35	10060	intron	A/G	0.406626	0.194854	YES	2	2	2	1	reference
ABCC9_rs2307024	ABCC9	http://www.ncbi.nlm.nih.gov/entrez/query.fcgi?db=gene&cmd=Retrieve&dopt=full_report&list_uids=10060	rs2307024		http://www.ncbi.nlm.nih.gov/SNP/snp_ref.cgi?rs=2307024	A	C	GAAGGAACTTTGAAGGACATTCAAACCAAAGATGTTGAGCTTTATGAACACTGGAAAACACTTATGAATCGGCAAGATCAAGAATTAGAAAAGGTAAGTGCTCATAGTTCAGAAGAGTTC[A/C]GAGCCCAATTCAGAAGAGTTAGAAATTTACTAATTACTAAGAATGCTTTTTAAAAAATTACCATTTAATACTTTGTAATATAATGGTCTTTATCTGAAATCCAAAGCAATTGTATCTTTG	GAAGGAACTTTGAAGGACATTCAAACCAAAGATGTTGAGCTTTATGAACACTGGAAAACACTTATGAATCGGCAAGATCAAGAATTAGAAAAGGTAAGTGCTCATAGTTCAGAAGAGTTC[C/A]GAGCCCAATTCAGAAGAGTTAGAAATTTACTAATTACTAAGAATGCTTTTTAAAAAATTACCATTTAATACTTTGTAATATAATGGTCTTTATCTGAAATCCAAAGCAATTGTATCTTTG	C	A	0.60279	0.00940567	0.39721	0.00940567	0.364905	0.00649137	0.475771	0.00649137	0.159325	0.00649137	1362	2	0.364211	0.475771	0.478868	0.0569859	0.811325	0.8224	497	648	217	0.84151	12	21896270	-19997		35	10060	intron	A/C	0.394508	0.204004	YES	2	2	2	1	reference
ABCC9_rs3782667	ABCC9	http://www.ncbi.nlm.nih.gov/entrez/query.fcgi?db=gene&cmd=Retrieve&dopt=full_report&list_uids=10060	rs3782667		http://www.ncbi.nlm.nih.gov/SNP/snp_ref.cgi?rs=3782667	A	G	ACCTTTCCTATTTTTTTCTTGTCTGACAGAATAAAGGTCTAAGAATGTTCAGAAGATGAGCTGGATATGGATGAAAAGATACAGGCTGAGTGTGTCAAAGTTTCCATTAGGAAAACAGAA[A/G]GTTTCTTGCCAAATAGAAACACGCAGAAAGAATGTTCACTGCATTTTCACCCCTCCCCTCTCACTGCTGCCTCAGACTATTGCCAACTCCATTTACAAACTCTTTAAGAGTGGATCTGAA	TTCAGATCCACTCTTAAAGAGTTTGTAAATGGAGTTGGCAATAGTCTGAGGCAGCAGTGAGAGGGGAGGGGTGAAAATGCAGTGAACATTCTTTCTGCGTGTTTCTATTTGGCAAGAAAC[C/T]TTCTGTTTTCCTAATGGAAACTTTGACACACTCAGCCTGTATCTTTTCATCCATATCCAGCTCATCTTCTGAACATTCTTAGACCTTTATTCTGTCAGACAAGAAAAAAATAGGAAAGGT	C	T	0.392438	0.00937359	0.607562	0.00937359	0.154919	0.00646295	0.475037	0.00646295	0.370044	0.00646295	1362	2	0.363163	0.475037	0.476861	0.0199259	0.887744	0.9082	211	647	504	0.958481	12	21876273	50241		35	10060	intron	C/T	0.377415	0.215094	YES	2	2	2	1	reference
ABCC9_rs4148665	ABCC9	http://www.ncbi.nlm.nih.gov/entrez/query.fcgi?db=gene&cmd=Retrieve&dopt=full_report&list_uids=10060	rs4148665		http://www.ncbi.nlm.nih.gov/SNP/snp_ref.cgi?rs=4148665	A	G	GCCTTTGACTGCTGCCGGCAGCTCTTCCAATTCCTGCACAACACTGATTACTCCCTTTTATCCCCAACTCTCGGTTGCCTGTTCTGCCTTAACTTAAGCACAATGCCTGGGGAGAGTCCA[A/G]ATAGCCAAGTTTGAAATGAGATCAAGGGCAGTACCGGGAAACTGGTGAATGCATACACTAGTCTGAGTCTCCCCTGATTGAAAACAATGACTATTTAATTTATATTCCTGAAATTTGAAC	GTTCAAATTTCAGGAATATAAATTAAATAGTCATTGTTTTCAATCAGGGGAGACTCAGACTAGTGTATGCATTCACCAGTTTCCCGGTACTGCCCTTGATCTCATTTCAAACTTGGCTAT[C/T]TGGACTCTCCCCAGGCATTGTGCTTAAGTTAAGGCAGAACAGGCAACCGAGAGTTGGGGATAAAAGGGAGTAATCAGTGTTGTGCAGGAATTGGAAGAGCTGCCGGCAGCAGTCAAAGGC	C	T	0.238253	0.00797348	0.761747	0.00797348	0.0484581	0.00473937	0.379589	0.00473937	0.571953	0.00473937	1362	2	0.297101	0.379589	0.362977	2.85284	0.0912124	0.1016	66	517	779	0.933826	12	21926514	-68546		35	10060	intron	C/T	0.438349	0.164392	YES	2	2	2	1	reference
ABCC9_rs4148679	ABCC9	http://www.ncbi.nlm.nih.gov/entrez/query.fcgi?db=gene&cmd=Retrieve&dopt=full_report&list_uids=10060	rs4148679		http://www.ncbi.nlm.nih.gov/SNP/snp_ref.cgi?rs=4148679	A	G	ACTATAGTACTTTGCATGTTTATTGTACTTGACAGTTTATATTATTGAATTTAATCTACACAACAGCTCTGTGAGATAAAGAGGTCAGTTTATGAACAACAACATGGAACTATAGTAAAT[A/G]TAGTTTTTTTGGGGTTCAGATTCAGGAACAAGGTAAACTTCTGTCACTAAGTTAGCAGCTTATTTTTTCCATGGCTAGTAATAATGCACAGATACTTTAAGGACTTTCAGTGGGATTAAA	ACTATAGTACTTTGCATGTTTATTGTACTTGACAGTTTATATTATTGAATTTAATCTACACAACAGCTCTGTGAGATAAAGAGGTCAGTTTATGAACAACAACATGGAACTATAGTAAAT[G/A]TAGTTTTTTTGGGGTTCAGATTCAGGAACAAGGTAAACTTCTGTCACTAAGTTAGCAGCTTATTTTTTCCATGGCTAGTAATAATGCACAGATACTTTAAGGACTTTCAGTGGGATTAAA	G	A	0.856461	0.00671668	0.143539	0.00671668	0.73348	0.00332856	0.245962	0.00332856	0.020558	0.00332856	1362	2	0.215645	0.245962	0.245871	0.000185889	0.989122	1	999	335	28	0.967229	12	21857968	25423		35	10060	intron	A/G	0.296522	0.245633	YES	2	2	2	1	reference
ABCC9_rs704176	ABCC9	http://www.ncbi.nlm.nih.gov/entrez/query.fcgi?db=gene&cmd=Retrieve&dopt=full_report&list_uids=10060	rs704176		http://www.ncbi.nlm.nih.gov/SNP/snp_ref.cgi?rs=704176	C	G	AGAAATAGCCAAGCTATATGTGACTCTTGTTTACCCTGTGAAAACTAATTGATCATCACAGCAAATAGGGCTTCTTCTGACTGTCCCACATTCCCCTACTTCCTATTTTAAACTTGACCA[C/G]CATCACATTAATTCTGAACATTTTTTTAAAAACCTCTTATATGGACTATATTAACTGATCTTCCTCACTCACCCATTCTCTTTCATCCTGTACATTGTCTCCCAAGTTATGTTGATTAAA	TTTAATCAACATAACTTGGGAGACAATGTACAGGATGAAAGAGAATGGGTGAGTGAGGAAGATCAGTTAATATAGTCCATATAAGAGGTTTTTAAAAAAATGTTCAGAATTAATGTGATG[C/G]TGGTCAAGTTTAAAATAGGAAGTAGGGGAATGTGGGACAGTCAGAAGAAGCCCTATTTGCTGTGATGATCAATTAGTTTTCACAGGGTaaacaagagtcacatatagcttggctatttct	C	G	0.554332	0.0094591	0.445668	0.0094591	0.303965	0.00669136	0.500734	0.00669136	0.195301	0.00669136	1362	2	0.372031	0.500734	0.494096	0.245835	0.620023	0.6579	414	682	266	0.870007	12	21883391	22898		35	10060	intron	C/G	0.466622	0.1248	YES	2	2	2	1	reference
ABCC9_rs704191	ABCC9	http://www.ncbi.nlm.nih.gov/entrez/query.fcgi?db=gene&cmd=Retrieve&dopt=full_report&list_uids=10060	rs704191		http://www.ncbi.nlm.nih.gov/SNP/snp_ref.cgi?rs=704191	A	G	GACATTTAGGAGTCAGTTGGAATAATTATCCAGGCATGCAGTGTGTGTTGCCTACACTTAGGAATGACGGTAGAAATATAAAAGAAGGGATGGTTGAGAAAAAAAAATTGAAGAACAACA[A/G]TGGACAGATATCAACAGGAAGAAGAAGAGGGAAGAATGAAGAATGACTCTACTACATTAAGATGAACTGATTAAGAAAATAAAATCATTGCCATTTCCCCCAGCATCTTCAATCCCCATG	GACATTTAGGAGTCAGTTGGAATAATTATCCAGGCATGCAGTGTGTGTTGCCTACACTTAGGAATGACGGTAGAAATATAAAAGAAGGGATGGTTGAGAAAAAAAAATTGAAGAACAACA[A/G]TGGACAGATATCAACAGGAAGAAGAAGAGGGAAGAATGAAGAATGACTCTACTACATTAAGATGAACTGATTAAGAAAATAAAATCATTGCCATTTCCCCCAGCATCTTCAATCCCCATG	A	G	0.447504	0.00950224	0.552496	0.00950224	0.198972	0.00669856	0.497063	0.00669856	0.303965	0.00669856	1362	2	0.372229	0.497063	0.494488	0.0369297	0.847608	0.8696	271	677	414	0.831292	12	21906289	-15914		35	10060	intron	A/G	0.427873	0.175673	YES	2	2	2	1	reference
ABCC9_rs829079	ABCC9	http://www.ncbi.nlm.nih.gov/entrez/query.fcgi?db=gene&cmd=Retrieve&dopt=full_report&list_uids=10060	rs829079		http://www.ncbi.nlm.nih.gov/SNP/snp_ref.cgi?rs=829079	A	C	CTGGAAGTTTCCTCCTTGGGGCCATAGACAGCATGGAGTATGCCCTCTTGTGCTATGCACAGATTTCAGAGCTTACTCCCTCCTGGTGCAGCTTTATAAATTCAGAAATTTGCAGGTCAC[A/C]ATATTGTAGATGTTTGTAAGCCAGGTATGTGGTTTTTGTTGGCAACACAATTCCTTCAATAACTTTGTAAGTTTCTTCCAGTCAATTTGATGTGCAGTAAATCAGCAAATAGTCTCATCC	CTGGAAGTTTCCTCCTTGGGGCCATAGACAGCATGGAGTATGCCCTCTTGTGCTATGCACAGATTTCAGAGCTTACTCCCTCCTGGTGCAGCTTTATAAATTCAGAAATTTGCAGGTCAC[A/C]ATATTGTAGATGTTTGTAAGCCAGGTATGTGGTTTTTGTTGGCAACACAATTCCTTCAATAACTTTGTAAGTTTCTTCCAGTCAATTTGATGTGCAGTAAATCAGCAAATAGTCTCATCC	A	C	0.491189	0.00947092	0.508811	0.00947092	0.235683	0.00677021	0.511013	0.00677021	0.253304	0.00677021	1362	2	0.374922	0.511013	0.499845	0.679977	0.409595	0.4561	321	696	345	0.943026	12	21890375	755		35	10060	intron	A/C	0.487151	0.0791161	YES	2	2	2	1	reference
ABCC9_rs829080	ABCC9	http://www.ncbi.nlm.nih.gov/entrez/query.fcgi?db=gene&cmd=Retrieve&dopt=full_report&list_uids=10060	rs829080		http://www.ncbi.nlm.nih.gov/SNP/snp_ref.cgi?rs=829080	A	G	CAGAATGCTCAAGCCAACAGTAGGGGAAGAAAAGAAGTAGAGGGTACTTCCTTTCTCTTAAGAGAAAGGAGTTGAGTCTTAAGAGACTCAACTCAAGTCTTAAGAGACTTGGAGTTGCAC[A/G]TATTGTTTCTGTTTACTTATTATTGGCTCTTTCATTGCTTGGAAAGATTAAGTACTAGGAATGTGAGGAAATGCTGTCTTTAGCTGGGCAGCCATGGACAACTTTAAATTTCAATTAATA	TATTAATTGAAATTTAAAGTTGTCCATGGCTGCCCAGCTAAAGACAGCATTTCCTCACATTCCTAGTACTTAATCTTTCCAAGCAATGAAAGAGCCAATAATAAGTAAACAGAAACAATA[C/T]GTGCAACTCCAAGTCTCTTAAGACTTGAGTTGAGTCTCTTAAGACTCAACTCCTTTCTCTTAAGAGAAAGGAAGTACCCTCTACTTCTTTTCTTCCCCTACTGTTGGCTTGAGCATTCTG	C	T	0.418075	0.00932632	0.581925	0.00932632	0.168259	0.00658251	0.499633	0.00658251	0.332109	0.00658251	1361	2	0.368198	0.499633	0.486577	0.979895	0.322225	0.3484	229	680	452	0.953327	12	21891130	-10542		35	10060	intron	C/T	0.497794	0.033137	YES	2	2	2	1	reference
ABCC9_rs864360	ABCC9	http://www.ncbi.nlm.nih.gov/entrez/query.fcgi?db=gene&cmd=Retrieve&dopt=full_report&list_uids=10060	rs864360		http://www.ncbi.nlm.nih.gov/SNP/snp_ref.cgi?rs=864360	C	G	TACCACACATTGAAAGGATCCAGTCTAAGTTATTTAAAGATACTTATCAATGCCCTTTGTGCACTGGCCTCTACTATGGTTTCAAGCCTCATCGCCACAGACAGCTTCTCTGTACTTAAT[C/G]TATGTTCCAACAGTACTGGACTCTTTTGATTTACATATAAAATAGAAATCTTTATATTTTCACACATCTGTTATATCTTCTTTCAATATTCTATCTCCTGTATCTGCCAGGTCAATTATT	taccacacattgaaaggatccagtctaagttatttaaagatacttatcaatgccctttgtgcactggcctctactatggtttcaagcctcatcgccacagacagcttctctgtacttaat[G/C]tatgttccaacagtactggactctttTGATTTACATATAAAATAGAAATCTTTATATTTTCACACATCTGTTATATCTTCTTTCAATATTCTATCTCCTGTATCTGCCAGGTCAATTATT	G	C	0.646476	0.00922975	0.353524	0.00922975	0.421439	0.00620983	0.450073	0.00620983	0.128488	0.00620983	1362	2	0.352624	0.450073	0.45709	0.320913	0.571059	0.5855	574	613	175	0.95285	12	21880588	37031372		35	10060	intron	C/G	0.408606	0.193246	YES	2	2	2	1	reference
ACE_rs17230271	ACE	http://www.ncbi.nlm.nih.gov/entrez/query.fcgi?db=gene&cmd=Retrieve&dopt=full_report&list_uids=1636	rs17230271	rs4305	http://www.ncbi.nlm.nih.gov/SNP/snp_ref.cgi?rs4305	A	G	GGAAACAAGCACTGTGGCCCTGCCTCAGGATTGAGTGGCTGGGGCCTGGC[A/G]CAGCCAGAAATGACAGTGGCAGCATCTTGCAGCCCCAGGACATGTGGCCC	GGAAACAAGCACTGTGGCCCTGCCTCAGGATTGAGTGGCTGGGGCCTGGC[A/G]CAGCCAGAAATGACAGTGGCAGCATCTTGCAGCCCCAGGACATGTGGCCC	A	G	0.436444	0.00938797	0.563556	0.00938797	0.184423	0.00665967	0.504041	0.00665967	0.311536	0.00665967	1361	2	0.370928	0.504041	0.491921	0.826166	0.363384	0.3809	251	686	424	0.83264	17	58911961	2788		35.1	1636	intron	A/G	0.495465	0.0474027	YES
ACE_rs17230285	ACE	http://www.ncbi.nlm.nih.gov/entrez/query.fcgi?db=gene&cmd=Retrieve&dopt=full_report&list_uids=1636	rs17230285	rs4313	http://www.ncbi.nlm.nih.gov/SNP/snp_ref.cgi?rs4313	A	G	AGGAGAGTGGGCCACTCTAACTCCAGGCCTTTGAGGTCTGGAGGAGCATG[A/G]GGACAAGCCCTGGGGATGAGGCAGCTAGGATCACAGGAGGAGAAGTGGAT	ATCCACTTCTCCTCCTGTGATCCTAGCTGCCTCATCCCCAGGGCTTGTCC[C/T]CATGCTCCTCCAGACCTCAAAGGCCTGGAGTTAGAGTGGCCCACTCTCCT	C	T	0.0609398	0.00455225	0.93906	0.00455225	0.00293686	0.0014015	0.116006	0.0014015	0.881057	0.0014015	1362	2	0.107903	0.116006	0.114452	0.250962	0.616399	0.8183	4	158	1200	0.819218	17	58914749	3035		35.1	1636	intron	C/T	0.15879	0.232768	YES
ACE_rs17230334	ACE	http://www.ncbi.nlm.nih.gov/entrez/query.fcgi?db=gene&cmd=Retrieve&dopt=full_report&list_uids=1636	rs17230334	rs4331	http://www.ncbi.nlm.nih.gov/SNP/snp_ref.cgi?rs4331	A	G	ACCACTATCAAGCGGATCATAAAGAAGGTTCAGGACCTAGAACGGGCAGC[A/G]CTGCCTGCCCAGGAGCTGGAGGAGGTGTGTGGCTCGCAAGGTACAGGGAG	ACCACTATCAAGCGGATCATAAAGAAGGTTCAGGACCTAGAACGGGCAGC[A/G]CTGCCTGCCCAGGAGCTGGAGGAGGTGTGTGGCTCGCAAGGTACAGGGAG	A	G	0.521659	0.00957611	0.478341	0.00957611	0.272394	0.00676141	0.498532	0.00676141	0.229075	0.00676141	1362	2	0.37453	0.498532	0.499062	0.00153712	0.968726	1	371	679	312	0.958728	17	58917784	973		35.1	1636	synonymous	A/G	0.387812	0.208586	YES
ACE_rs17230348	ACE	http://www.ncbi.nlm.nih.gov/entrez/query.fcgi?db=gene&cmd=Retrieve&dopt=full_report&list_uids=1636	rs17230348	rs4335	http://www.ncbi.nlm.nih.gov/SNP/snp_ref.cgi?rs4335	A	G	CAGCTCTTGACTGTCCTCTTTTCTCCCCACTGGCTGGTCCTTCTTACCCC[A/G]GCCCGTTTGAAAGAGCTCACCCCCGACACAAGGACCCGCACACAGATACC	CAGCTCTTGACTGTCCTCTTTTCTCCCCACTGGCTGGTCCTTCTTACCCC[A/G]GCCCGTTTGAAAGAGCTCACCCCCGACACAAGGACCCGCACACAGATACC	A	G	0.483847	0.00963318	0.516153	0.00963318	0.237151	0.0067667	0.493392	0.0067667	0.269457	0.0067667	1362	2	0.374739	0.493392	0.499478	0.20222	0.652935	0.6654	323	672	367	0.940438	17	58918757	6427		35.1	1636	intron	A/G	0.44938	0.150823	YES
ACE_rs17230365	ACE	http://www.ncbi.nlm.nih.gov/entrez/query.fcgi?db=gene&cmd=Retrieve&dopt=full_report&list_uids=1636	rs17230365	rs4354	http://www.ncbi.nlm.nih.gov/SNP/snp_ref.cgi?rs4354	A	G	CCATCCAGACACCCAGGCACATGCAGACACTCGCAGAGATCCCCCAGCCC[A/G]CATCCCGTGGGAGTGTTCCAGAACCTGAGGCTCCACCACTCCTGGTTATA	TATAACCAGGAGTGGTGGAGCCTCAGGTTCTGGAACACTCCCACGGGATG[C/T]GGGCTGGGGGATCTCTGCGAGTGTCTGCATGTGCCTGGGTGTCTGGATGG	C	T	0.0227606	0.00282405	0.977239	0.00282405			0.0455213	0.000128554	0.954479	0.000128554	1362	2	0.0434957	0.0455213	0.0444852	0.73883	0.390036	1	0	62	1300	0.79962	17	58925184			35.1	1636	intron	C/T	0.0487499	0.148319	NO
ACE_rs17236757	ACE	http://www.ncbi.nlm.nih.gov/entrez/query.fcgi?db=gene&cmd=Retrieve&dopt=full_report&list_uids=1636	rs17236757	rs4309	http://www.ncbi.nlm.nih.gov/SNP/snp_ref.cgi?rs4309	A	G	TCCCCAATGGCCTCATGGAAGCCGGGGTTGGCCCCCCGACGCAGGGAGAC[A/G]GGCAGATCCTTGTACTGCAGGTAGTACTGTATATGGCCCATCTCATGGTG	CACCATGAGATGGGCCATATACAGTACTACCTGCAGTACAAGGATCTGCC[C/T]GTCTCCCTGCGTCGGGGGGCCAACCCCGGCTTCCATGAGGCCATTGGGGA	C	T	0.442689	0.00963704	0.557311	0.00963704	0.202057	0.00668991	0.481264	0.00668991	0.316679	0.00668991	1361	2	0.371694	0.481264	0.493431	0.827531	0.362987	0.3992	275	655	431	0.596824	17	58913655	-43535936		35.1	1636	synonymous	C/T	0.408163	0.193609	YES
ADIPOQ_rs182052	ADIPOQ	http://www.ncbi.nlm.nih.gov/entrez/query.fcgi?db=gene&cmd=Retrieve&dopt=full_report&list_uids=9370	rs182052		http://www.ncbi.nlm.nih.gov/SNP/snp_ref.cgi?rs=182052	A	G	GAGCAGCACTGGTGGAGGCAGATATGCACTGGGCTTCTTCCTCCGTTCTCCCACAGCCCCAAGAGAGAAAGGGTTATTTCAGACATTCCTTCTAAGATGCATGGAACCATTCTGAATTTT[A/G]CCCAGTTCGCTCTGTAGCAGGATACCTATTGAGAAAAAGTTAGGGTCAGTAAGGTGGAAGGGTCTGTCCACAGATGAAGTCCAATTCGATTAAGGGGGATAAGGGAATACATTGCCTCTT	GAGCAGCACTGGTGGAGGCAGATATGCACTGGGCTTCTTCCTCCGTTCTCCCACAGCCCCAAGAGAGAAAGGGTTATTTCAGACATTCCTTCTAAGATGCATGGAACCATTCTGAATTTT[G/A]CCCAGTTCGCTCTGTAGCAGGATACCTATTGAGAAAAAGTTAGGGTCAGTAAGGTGGAAGGGTCTGTCCACAGATGAAGTCCAATTCGATTAAGGGGGATAAGGGAATACATTGCCTCTT	G	A	0.347283	0.00932293	0.652717	0.00932293	0.13069	0.00619209	0.433186	0.00619209	0.436123	0.00619209	1362	2	0.35059	0.433186	0.453355	2.69563	0.100624	0.1056	178	590	594	0.936942	3	188043484	-1308	10	35	9370	mrna-utr	A/G	0.471126	0.116634	YES	2	2	2	1	reference
ADIPOQ_rs266729	ADIPOQ	http://www.ncbi.nlm.nih.gov/entrez/query.fcgi?db=gene&cmd=Retrieve&dopt=full_report&list_uids=9370	rs266729		http://www.ncbi.nlm.nih.gov/SNP/snp_ref.cgi?rs=266729	C	G	GAAGCAGCCTGGAGAACTGGAAGCTGCCACCCACTTAGGTGTTCCTAGAAAGTTTAGGCTTGAAGTGGCAACATTCAACACCTTGGACTTTCTTGGCACGCTCATGTTTTGTTTTTGAAG[C/G]GCAGGATCTGAGCCGGTTCTTGCAAGCCACACATTCTGATGAATTAAATTACGACCCCAGCAAGGGCTTAGGATGCCAGCACCAACTTCAACAAGACATCCAAAACAGAATTTTCTCAGA	TCTGAGAAAATTCTGTTTTGGATGTCTTGTTGAAGTTGGTGCTGGCATCCTAAGCCCTTGCTGGGGTCGTAATTTAATTCATCAGAATGTGTGGCTTGCAAGAACCGGCTCAGATCCTGC[C/G]CTTCAAAAACAAAACATGAGCGTGCCAAGAAAGTCCAAGGTGTTGAATGTTGCCACTTCAAGCCTAAACTTTCTAGGAACACCTAAGTGGGTGGCAGCTTCCAGTTCTCCAGGCTGCTTC	C	G	0.271852	0.0088341	0.728148	0.0088341	0.0866667	0.00555632	0.37037	0.00555632	0.542963	0.00555632	1350	2	0.31753	0.37037	0.395897	5.61244	0.0178335	0.0171	117	500	733	0.360181	3	188042176	12340	10	35	9370	locus-region	C/G	0.403876	0.197034	YES	2	2	2	1	reference
ADIPOQ_rs3774262	ADIPOQ	http://www.ncbi.nlm.nih.gov/entrez/query.fcgi?db=gene&cmd=Retrieve&dopt=full_report&list_uids=9370	rs3774262		http://www.ncbi.nlm.nih.gov/SNP/snp_ref.cgi?rs=3774262	A	G	GTTGATGGTGCCAGCACATAAAGGGCTGGCAGGGTGGAGGGTCTATGATAGAGACCTATAGGAGATAAAGATAGAGTTGAAATTATGGGAGCCTCCATGTCTGTGGGAGATATAGAAGGA[A/G]GAGGTAACACCTCTCTCCTTTTGGGAGCTCTTATTGGTTTCTTGATCTATAAGTCAAGAAGGTTGTGAGTGGGAGCCACAGGGATGGTAATTTAGGCTGTAACCAACCTAGGCAGGAGTT	gTTGATGGTGCCAGCACATAAAGGGCTGGCAGGGTGGAGGGTCTATGATAGAGACCTATAGGAGATAAAGATAGAGTTGAAATTATGGGAGCCTCCATGTCTGTGGGAGATATAGAAGGA[G/A]GAGGTAACACCTCTCTCCTTTTGGGAGCTCTTATTGGTTTCTTGATCTATAAGTCAAGAAGGTTGTGAGTGGGAGCCACAGGGATGGTAATTTAGGCTGTAACCAACCTAGGCAGGAGTT	G	A	0.11417	0.00625146	0.88583	0.00625146	0.0183554	0.00313291	0.19163	0.00313291	0.790015	0.00313291	1362	2	0.181814	0.19163	0.202271	3.76942	0.0521979	0.0597	25	261	1076	0.94387	3	188054516	7930	10	35	9370	intron	A/G	0.124444	0.216185	YES	2	2	2	1	reference
ADIPOQ_rs6444175	ADIPOQ	http://www.ncbi.nlm.nih.gov/entrez/query.fcgi?db=gene&cmd=Retrieve&dopt=full_report&list_uids=9370	rs6444175		http://www.ncbi.nlm.nih.gov/SNP/snp_ref.cgi?rs=6444175	A	G	TATATATATATATTACATATATATATATTTCCCAGACTGGGTTCTTGGCATGTTGTTCATTTCTTTTTTTTGTTGCTTTTCTGTAGTATACCTGGCTGATCCAGCTTGCTTGTGTTGAAC[A/G]TGGGTCTTTCTAGACTTTGTTTGCTCTGATACAGTGAGCATGACTGCCATCTCTGATACTTGCATGTCTCACCTCCCAGCCACAGAGCAAGAGCTGAAATCTCATTTTCTTTCCACTTTT	tatatatatatattacatatatatatatTTCCCAGACTGGGTTCTTGGCATGTTGTTCATTTCTTTTTTTTGTTGCTTTTCTGTAGTATACCTGGCTGATCCAGCTTGCTTGTGTTGAAC[G/A]TGGGTCTTTCTAGACTTTGTTTGCTCTGATACAGTGAGCATGACTGCCATCTCTGATACTTGCATGTCTCACCTCCCAGCCACAGAGCAAGAGCTGAAATCTCATTTTCTTTCCACTTTT	G	A	0.290595	0.0088421	0.709405	0.0088421	0.0911095	0.00566141	0.398971	0.00566141	0.509919	0.00566141	1361	2	0.327304	0.398971	0.412299	1.42218	0.233045	0.2365	124	543	694	0.950696	3	188062446		10	35	9370	locus-region, 3'	A/G	0.4156	0.187288	YES	2	2	2	1	reference
ADIPOQ_rs822387	ADIPOQ	http://www.ncbi.nlm.nih.gov/entrez/query.fcgi?db=gene&cmd=Retrieve&dopt=full_report&list_uids=9370	rs822387		http://www.ncbi.nlm.nih.gov/SNP/snp_ref.cgi?rs=822387	A	G	AGATTTCAACAAAACTAAAACTTTTGCTCTGTGAAACATCCTGTTAAGAGGAGGAAAAGGCAATATATGAATTAGAGGAATGTATTTGCAAACCATATTTGAGACAAGAGATTTGGATCT[A/G]GATTGTATAAAGAAATCTCAAAACTAAATGGTAAAAAAAAATTCAATTAGAAAATGGACAAAGGACATGAACAATTATTTCACCAAGTAGGAAACACAAATGACAAACAAGCACATGCAA	ttgcatgtgcttgtttgtcatttgtgtttcctacttggtgaaataattgttcatgtcctttgtccattttctaattgaatttttttttaccatttagttttgagatttctttatacaatc[T/C]agatccaaatctcttgtctcaaatatggtttgcaaatacattcctctaattcatatattgccttttcctcctcttaacaggatgtttcacagagcaaaagttttagttttgttgaaatct	T	C	0.906755	0.0055021	0.0932452	0.0055021	0.820117	0.00205709	0.173275	0.00205709	0.00660793	0.00205709	1362	2	0.154804	0.173275	0.169101	0.829626	0.362381	0.428	1117	236	9	0.976892	3	188038739	10840	10	35	9370	locus-region, 5'	C/T	0.18	0.24	YES	2	2	2	1	reference
ADIPOQ_rs822396	ADIPOQ	http://www.ncbi.nlm.nih.gov/entrez/query.fcgi?db=gene&cmd=Retrieve&dopt=full_report&list_uids=9370	rs822396		http://www.ncbi.nlm.nih.gov/SNP/snp_ref.cgi?rs=822396	A	G	CGTGCCACTGTCATGGAACCCAGGCTGATCGCACCTATTAGTGGAGAAATATGTCCATAATACTGAAGTTTGGGGACAAACAGTGTTCCCTTAGGGTAGGAGAAAGAGATCTTTATTTTT[A/G]ACAAAGGGGGAGGAGCCAGAAAACTCCAGAGACCCCTGAGTTTGCCCTCTCTCCAAGGTTTGGGGTAAGCCCCCCGTCACCCTTTATCTCTGGGGCTTTCACATATTCTGGATTCTCTCC	CGTGCCACTGTCATGGAACCCAGGCTGATCGCACCTATTAGTGGAGAAATATGTCCATAATACTGAAGTTTGGGGACAAACAGTGTTCCCTTAGGGTAGGAGAAAGAGATCTTTATTTTT[G/A]ACAAAGGGGGAGGAGCCAGAAAACTCCAGAGACCCCTGAGTTTGCCCTCTCTCCAAGGTTTGGGGTAAGCCCCCCGTCACCCTTTATCTCTGGGGCTTTCACATATTCTGGATTCTCTCC	G	A	0.82232	0.0074876	0.17768	0.0074876	0.682819	0.0042022	0.279001	0.0042022	0.0381791	0.0042022	1362	2	0.249523	0.279001	0.292219	2.78671	0.0950494	0.0957	930	380	52	0.936411	3	188049579	2730	10	35	9370	mrna-utr	A/G	0.258546	0.249854	YES	2	2	2	1	reference
ADIPOQ_rs9877202	ADIPOQ	http://www.ncbi.nlm.nih.gov/entrez/query.fcgi?db=gene&cmd=Retrieve&dopt=full_report&list_uids=9370	rs9877202		http://www.ncbi.nlm.nih.gov/SNP/snp_ref.cgi?rs=9877202	A	G	CATTATAAAAGTGCTTATTTAGTCCCTACTCTGCTATTAGTGTGTTAGTCTTTGTCCCCTGGTACTTGCTGTTTAATGGAGAAATGGGTGAGCAAAACAGAAATTACAGCAGAGTGCAAT[A/G]ATAGAGCTAAGCCAGGTGTATAAATCCATTCTCACACTGCTGTAAAAAACTACTTGAGACTGGGTAATTTATAAAGAAAAGAGGTTTAATTGACTCACAGTTCCACAGGCTGTACAGGAA	CATTATAAAAGTGCTTATTTAGTCCCTACTCTGCTATTAGTGTGTTAGTCTTTGTCCCCTGGTACTTGCTGTTTAATGGAGAAATGGGTGAGCAAAACAGAAATTACAGCAGAGTGCAAT[G/A]ATAGAGCTAAGCCAGGtgtataaatccattctcacactgctgtaaaaaactacttgagactgggtaatttataaagaaaagaggtttaattgactcacagttccacaggctgtacaggaa	G	A	0.999266	0.000518787	0.000734214	0.000518787	0.998532	7.61801e-07	0.00146843	7.61801e-07			1362	2	0.00146627	0.00146843	0.00146735	0.000735294	0.978367	1	1360	2	0	0.861031	3	188052309	-130434	10	35	9370	mrna-utr	A/G	0.0734223	0.176975	YES	2	2	2	1	reference
ADPRTL2_rs1713411	ADPRTL2	http://www.ncbi.nlm.nih.gov/entrez/query.fcgi?db=gene&cmd=Retrieve&dopt=full_report&list_uids=10038	rs1713411		http://www.ncbi.nlm.nih.gov/SNP/snp_ref.cgi?rs=1713411	A	C	CCAAAGTGTTGGGATTATAGGCATGACCCATCACACCCAGCCTCAACTTTCAAAATAGTTCCTCTTCCCTCCATACAACCTGTCACCCCAAATCCCATTTTCTTCATTCAGTACTATGAG[A/C]AAGCTTTAAATCATAATGATAATAAAGTATCCATTAAAGGAGCTAGGAATTATAAGGAGAGAATGCAGAAGAAAATGTGAAGTCCTACCAAGTGGGGCTTTCTTGGTATTATACTTCATT	ccaaagtgttgggattataggcatgacccatcacacccagccTCAACTTTCAAAATAGTTCCTCTTCCCTCCATACAACCTGTCACCCCAAATCCCATTTTCTTCATTCAGTACTATGAG[A/C]AAGCTTTAAATCATAATGATAATAAAGTATCCATTAAAGGAGCTAGGAATTATAAGGAGAGAATGCAGAAGAAAATGTGAAGTCCTACCAAGTGGGGCTTTCTTGGTATTATACTTCATT	A	C	0.0440529	0.00394409	0.955947	0.00394409	0.00220264	0.00120913	0.0837004	0.00120913	0.914097	0.00120913	1362	2	0.0806775	0.0837004	0.0842244	0.0527139	0.818406	0.7416	3	114	1245	0.953991	14	19892335	-380		35	10038	intron	A/C	0.380882	0.213002	YES	2	2	2	1	reference
ADPRTL2_rs1713413	ADPRTL2	http://www.ncbi.nlm.nih.gov/entrez/query.fcgi?db=gene&cmd=Retrieve&dopt=full_report&list_uids=10038	rs1713413		http://www.ncbi.nlm.nih.gov/SNP/snp_ref.cgi?rs=1713413	C	G	TGTGGGAGGCAGAACTTGGATGGTCAACCCTCTATATCCATGGATTCAATGAACTGAGAATCAAAAATGTTTGAAAAATTGCTTCTGTACTGAACCTGTACAGCCTTTTTTTCCTTGCTT[C/G]TCATTATTCCCTAGACAGTGCAATATAAAAACTTTACAAAGCATTTACATTGTATAATATTGGGTGTTATAAGGAATCTAGAGATGATTTCTTAGATTGTCTTGTGTTTTGTTTGTTTTT	AAAAACAAACAAAACACAAGACAATCTAAGaaatcatctctagattccttataacacccaatattatacaatgtaaatgctttgtaaagtttttatattgcactgtctagggaataatga[C/G]aagcaaggaaaaaaaggctgtacaggttcagtacagaagcaatttttcaaacatttttgattctcagttcattgaatccatggatatagaGGGTTGACCatccaagttctgcctcccaca	C	G	0.646109	0.00900496	0.353891	0.00900496	0.409692	0.00615264	0.472834	0.00615264	0.117474	0.00615264	1362	2	0.352741	0.472834	0.457305	1.57067	0.21011	0.2343	558	644	160	0.839208	14	19891955	-7747		35	10038	intron	C/G	0.49374	0.0555928	YES	2	2	2	1	reference
ADPRTL2_rs1760925	ADPRTL2	http://www.ncbi.nlm.nih.gov/entrez/query.fcgi?db=gene&cmd=Retrieve&dopt=full_report&list_uids=10038	rs1760925		http://www.ncbi.nlm.nih.gov/SNP/snp_ref.cgi?rs=1760925	A	G	GAGATTTGGAAGGAGACAAATATACAAACTATATCACATGCGTACCTTTTGTGGTTGCCATCAGCCTTCTACACCTCATTCTCTTTTTAAACCAGAAAATGGTATCATTGTTAAGGGAAA[A/G]CTGTTTTCTTGTTCTAATGAGAAACTGTACCCTGGAATGGCATGAGTTACTGATGAATGGGGAAAAAAGAAGGCTACCTCTGGAATAAGTTTTCTTTAACTCAGTTAGAATCTTTTTTTT	aaaaaaaaGATTCTAACTGAGTTAAAGAAAACTTATTCCAGAGGTAGCCTTCTTTTTTCCCCATTCATCAGTAACTCATGCCATTCCAGGGTACAGTTTCTCATTAGAACAAGAAAACAG[T/C]TTTCCCTTAACAATGATACCATTTTCTGGTTTAAAAAGAGAATGAGGTGTAGAAGGCTGATGGCAACCACAAAAGGTACGCATGtgatatagtttgtatatttgtctccttccaaatctc	T	C	0.961821	0.00363526	0.0381791	0.00363526	0.924376	0.000732492	0.0748899	0.000732492	0.000734214	0.000732492	1362	2	0.0707461	0.0748899	0.073443	0.528607	0.467193	0.7265	1259	102	1	0.841849	14	19884208	-2791		35	10038	intron	C/T	0.253331	0.249978	YES	2	2	2	1	reference
ADPRTL2_rs2297619	ADPRTL2	http://www.ncbi.nlm.nih.gov/entrez/query.fcgi?db=gene&cmd=Retrieve&dopt=full_report&list_uids=10038	rs2297619		http://www.ncbi.nlm.nih.gov/SNP/snp_ref.cgi?rs=2297619	C	G	CCCTGTTAGGGCCGCCTCTTGGCCCTAGTCTCAGACCTTCCCAAGGGACATGGGAGTGGAGTGACAGGACGCACTCAGCTCGTGGCCCCACTGATGAGCTTCCCTCCGCCCTATGGGAAA[C/G]AGTGGTCTCATACAGAACTTATAAGATTCCCAAATCCAAAGACATTTCACGTTTATGGTGATTTCCCAGAACACATAGCGACATGCAAATATTGCAGGGCGCCACTCCCCTGTCCCTCAC	GTGAGGGACAGGGGAGTGGCGCCCTGCAATATTTGCATGTCGCTATGTGTTCTGGGAAATCACCATAAACGTGAAATGTCTTTGGATTTGGGAATCTTATAAGTTCTGTATGAGACCACT[C/G]TTTCCCATAGGGCGGAGGGAAGCTCATCAGTGGGGCCACGAGCTGAGTGCGTCCTGTCACTCCACTCCCATGTCCCTTGGGAAGGTCTGAGACTAGGGCCAAGAGGCGGCCCTAACAGGG	C	G	0.12188	0.00632738	0.87812	0.00632738	0.0168869	0.00304307	0.209985	0.00304307	0.773128	0.00304307	1362	2	0.191141	0.209985	0.21405	0.491113	0.483431	0.4487	23	286	1053	0.826592	14	19881417	890		35	10038	locus-region	C/G/T	0.100277	0.200207	YES	2	2	2	1	reference
ADPRTL2_rs3093882	ADPRTL2	http://www.ncbi.nlm.nih.gov/entrez/query.fcgi?db=gene&cmd=Retrieve&dopt=full_report&list_uids=10038	rs3093882		http://www.ncbi.nlm.nih.gov/SNP/snp_ref.cgi?rs=3093882	A	C	AATATTGGAGTAAGTGAAGTAGGAAGAGATCAAATACTTCTCCAAGTTTCCACAGAGAAAAGCAGCAGAGCTAGGCTCTAAATTAGGCACAGACCCTTGAGCACTTAACTAACCTTTATC[A/C]CATACGGCCTCATGTATGAGGTGGGTATTTGGGGGACATTGGGACACAAGTAAAACAGATAAGCAGGCCTCAATCTATGAGCTTACAAGACTCCTGGGACTCCCTTTTATTTTGTTTTAT	AATATTGGAGTAAGTGAAGTAGGAAGAGATCAAATACTTCTCCAAGTTTCCACAGAGAAAAGCAGCAGAGCTAGGCTCTAAATTAGGCACAGACCCTTGAGCACTTAACTAACCTTTATC[A/C]CATACGGCCTCATGTATGAGGTGGGTATTTGGGGGACATTGGGACACAAGTAAAACAGATAAGCAGGCCTCAATCTATGAGCTTACAAGACTCCTGGGACTCCCTTTTATTTTGTTTTAT	A	C	0.25257	0.0080468	0.74743	0.0080468	0.051395	0.00488095	0.402349	0.00488095	0.546256	0.00488095	1362	2	0.306282	0.402349	0.377557	5.87313	0.0153737	0.0179	70	548	744	0.88734	14	19882307	7262		35	10038	mrna-utr	A/C	0.390322	0.206905	YES	2	2	2	1	reference
ADPRTL2_rs3093907	ADPRTL2	http://www.ncbi.nlm.nih.gov/entrez/query.fcgi?db=gene&cmd=Retrieve&dopt=full_report&list_uids=10038	rs3093907		http://www.ncbi.nlm.nih.gov/SNP/snp_ref.cgi?rs=3093907	A	G	AATTTCCTAAATTTGTCAGTCATGTGTTAAATATATTAGATTCTTCTGTTTTTAGTGACTTTCAAGGTATTAGTTTGATTTAATCACTAAGGATGCAGTTTGGTGTTTCAACCACAGAAT[A/G]TCAGGGTGAAAAGACATTAACATTTAGGCCAAATCACACCTATAAAACGAAAAGTTTTTTATAAGCCACACACTTATAAAATTCTTAGAGAAGGCAGGGCACGGTGGCTCACGCCTGTAA	ttacaggcgtgagccaccgtgccctgccTTCTCTAAGAATTTTATAAGTGTGTGGCTTATAAAAAACTTTTCGTTTTATAGGTGTGATTTGGCCTAAATGTTAATGTCTTTTCACCCTGA[C/T]ATTCTGTGGTTGAAACACCAAACTGCATCCTTAGTGATTAAATCAAACTAATACCTTGAAAGTCACTAAAAACAGAAGAATCTAATATATTTAACACATGACTGACAAATTTAGGAAATT	C	T	0.309838	0.00861719	0.690162	0.00861719	0.0844347	0.00567864	0.450808	0.00567864	0.464758	0.00567864	1362	2	0.336223	0.450808	0.427677	3.98394	0.0459359	0.0486	115	614	633	0.912812	14	19889569	3366		35	10038	intron	C/T	0.21643	0.247736	YES	2	2	2	1	reference
ADPRTL2_rs3093927	ADPRTL2	http://www.ncbi.nlm.nih.gov/entrez/query.fcgi?db=gene&cmd=Retrieve&dopt=full_report&list_uids=10038	rs3093927		http://www.ncbi.nlm.nih.gov/SNP/snp_ref.cgi?rs=3093927	A	G	GACAGTGGCACAAATCAAGGCAGGTTACCAGTCTCTTAAGAAGATTGAGGATTGTATTCGGGCTGGCCAGCATGGACGAGCTCTCATGGAAGCATGCAATGAATTCTACACCAGGATTCC[A/G]CATGACTTTGGGTAAGGCCTGTGCTGTTACTTCACTTTGTTCTTCTACCTATACATATCCCCTGTATCCATCAGCAGCAGCTATAATCTTTTAAATCTTTTATTCCTAAGAAAATGATCG	GACAGTGGCACAAATCAAGGCAGGTTACCAGTCTCTTAAGAAGATTGAGGATTGTATTCGGGCTGGCCAGCATGGACGAGCTCTCATGGAAGCATGCAATGAATTCTACACCAGGATTCC[A/G]CATGACTTTGGGTAAGGCCTGTGCTGTTACTTCACTTTGTTCTTCTACCTATACATATCCCCTGTATCCATCAGCAGCAGCTATAATCTTTTAAATCTTTTATTCCTAAGAAAATGATCG	A	G	0.00367107	0.00115663	0.996329	0.00115663			0.00734214	8.49211e-06	0.992658	8.49211e-06	1362	2	0.00728843	0.00734214	0.00731519	0.0184909	0.891836	1	0	10	1352	0.902687	14	19892935			35	10038	coding-synon	A/G	0.0599426	0.162414	YES	2	2	2	1	reference
ADRB1_rs17875422	ADRB1	http://www.ncbi.nlm.nih.gov/entrez/query.fcgi?db=gene&cmd=Retrieve&dopt=full_report&list_uids=153	rs17875422		http://www.ncbi.nlm.nih.gov/SNP/snp_ref.cgi?rs=17875422	A	G	AGGAAGAACAGAAAAAAAGGGGAAAAACTTTTGTAAAGGTAATTTGCTAAAAGTATTTAAAAATAGTTCACGGTTATCCAGGCTCTAAACCCTATTAATATCTAGAGTGAAAAAGAAAGG[A/G]GTCAAGCGGATAAACAGAAGCTTATCTAAGTGAACTGATTCTTCTCATACAAGCAAATCCTGACCCCTTTCATGGTTTTCAATGTCATGATGATCGGAAAAGACAGCGTTTGTTGCTTTA	AGGAAGAACAGAAAAAAAGGGGAAAAACTTTTGTAAAGGTAATTTGCTAAAAGTATTTAAAAATAGTTCACGGTTATCCAGGCTCTAAACCCTATTAATATCTAGAGTGAAAAAGAAAGG[A/G]GTCAAGCGGATAAACAGAAGCTTATCTAAGTGAACTGATTCTTCTCATACAAGCAAATCCTGACCCCTTTCATGGTTTTCAATGTCATGATGATCGGAAAAGACAGCGTTTGTTGCTTTA	A	G	0.961454	0.00372402	0.0385463	0.00372402	0.92511	0.00120679	0.0726872	0.00120679	0.00220264	0.00120679	1362	2	0.0713739	0.0726872	0.0741209	0.509551	0.475333	0.4447	1260	99	3	0.964947	10	115788082	803		35	153	intron	A/G			YES	2	2	2	1	reference
ADRB1_rs17875426	ADRB1	http://www.ncbi.nlm.nih.gov/entrez/query.fcgi?db=gene&cmd=Retrieve&dopt=full_report&list_uids=153	rs17875426	rs2773469	http://www.ncbi.nlm.nih.gov/SNP/snp_ref.cgi?rs2773469	A	G	TAAGCTCTGACTAACAAATCCTTTGGTTTATTATAGCTTGATTTCAAATAGCTTCAGGCTATTATCAGCCTCAAGGCACATTTTGCTAACAGATTTCGTACACTTCTTGGGGTTTTATTA[A/G]GAAATTCCCCCACATATCCCTTGGCGTATCTTCCAGCAGTTGTCCAGTTAGGCTACTCACTTTTATTTTTAACTCATTTTCTAGTAAAGTCAACTCAAGAATGTAAATGTCTTTGCCAGG	TAAGCTCTGACTAACAAATCCTTTGGTTTATTATAGCTTGATTTCAAATAGCTTCAGGCTATTATCAGCCTCAAGGCACATTTTGCTAACAGATTTCGTACACTTCTTGGGGTTTTATTA[A/G]GAAATTCCCCCACATATCCCTTGGCGTATCTTCCAGCAGTTGTCCAGTTAGGCTACTCACTTTTATTTTTAACTCATTTTCTAGTAAAGTCAACTCAAGAATGTAAATGTCTTTGCCAGG	A	G	0.278267	0.00859491	0.721733	0.00859491	0.0778267	0.00544711	0.400881	0.00544711	0.521292	0.00544711	1362	2	0.321	0.400881	0.401669	0.00524356	0.942274	0.9476	106	546	710	0.855922	10	115788885	582		35	153	intron	A/G			YES	2	2	2	1	reference
ADRB1_rs17875428	ADRB1	http://www.ncbi.nlm.nih.gov/entrez/query.fcgi?db=gene&cmd=Retrieve&dopt=full_report&list_uids=153	rs17875428	rs4917675	http://www.ncbi.nlm.nih.gov/SNP/snp_ref.cgi?rs4917675	A	G	GCAATAATCCATATTCTTACCACCTATTCAACATTTTCACATAAACATTTCAAAATACTTTACAAAAGCAAGGTAGGCTCATGAGATAAATGTATATCATACCTATTCGTAGTAAATAAA[A/G]CGAGACATAGGTAAGAGATTTTCCAAAGGAGACATGCAAGTCCACGTCCATAAAAAATACTACCTGGCCAGGCTCAGTGGCTCCTGCCTGTAATCCCAACACTTTGGGAGGCTGAGTCAG	CTGACTCAGCCTCCCAAAGTGTTGGGATTACAGGCAGGAGCCACTGAGCCTGGCCAGGTAGTATTTTTTATGGACGTGGACTTGCATGTCTCCTTTGGAAAATCTCTTACCTATGTCTCG[C/T]TTTATTTACTACGAATAGGTATGATATACATTTATCTCATGAGCCTACCTTGCTTTTGTAAAGTATTTTGAAATGTTTATGTGAAAATGTTGAATAGGTGGTAAGAATATGGATTATTGC	C	T	0.755507	0.0083094	0.244493	0.0083094	0.574156	0.00506838	0.362702	0.00506838	0.0631424	0.00506838	1362	2	0.301192	0.362702	0.369433	0.45211	0.501334	0.5111	782	494	86	0.931435	10	115789467	1776		35	153	intron	C/T			YES	2	2	2	1	reference
ADRB1_rs17875436	ADRB1	http://www.ncbi.nlm.nih.gov/entrez/query.fcgi?db=gene&cmd=Retrieve&dopt=full_report&list_uids=153	rs17875436	rs2429511	http://www.ncbi.nlm.nih.gov/SNP/snp_ref.cgi?rs2429511	A	G	TGTTGGTCAGGCTGGTCTCGAACTCCTGACCTCAGGTGATCCACCCACCTTGGCCTCCCAAAGTGCTGGGATTAGAGGCATGAGCCACTGTCCCCGGCCTCCTGGCTTCCTTCTGGACCC[A/G]CAAGGGGCAGTCTCAAAATAGCCAAGGGATTGGAAGAAGTTGAAATTGACGCTGCCCAGGAAAGGAGTTCTGAGTGCTGAGCTGCAGGGTGAGGCATAGGGAATGTGGGGAAGAGGCTTT	AAAGCCTCTTCCCCACATTCCCTATGCCTCACCCTGCAGCTCAGCACTCAGAACTCCTTTCCTGGGCAGCGTCAATTTCAACTTCTTCCAATCCCTTGGCTATTTTGAGACTGCCCCTTG[C/T]GGGTCCAGAAGGAAGCCAGGAGGCCGGGGACAGTGGCTCATGCCTCTAATCCCAGCACTTTGGGAGGCCAAGGTGGGTGGATCACCTGAGGTCAGGAGTTCGAGACCAGCCTGACCAACA	C	T	0.52094	0.00972413	0.47906	0.00972413	0.279206	0.00676212	0.483468	0.00676212	0.237325	0.00676212	1361	2	0.374561	0.483468	0.499123	1.3389	0.247229	0.2542	380	658	323	0.802698	10	115791243	2783		35	153	intron	C/T			YES	2	2	2	1	reference
ADRB1_rs3813720	ADRB1	http://www.ncbi.nlm.nih.gov/entrez/query.fcgi?db=gene&cmd=Retrieve&dopt=full_report&list_uids=153	rs3813720		http://www.ncbi.nlm.nih.gov/SNP/snp_ref.cgi?rs=3813720	A	G	ACACTGATCATCCGCAGGCTGTGATTTTCTATTGGAAAACAAAAATAAGCTGTGGAAGCCACTTATTGCATTCCAAGTAGGCAACTGATCATTCAATGAGTTAGTCTTTCCTGCATTTCC[A/G]TGAAAAGTTGCAGCTGAGTTAAATGACCGCGTCACTTTTTTTTTTTTTTTTTTTTTTTTAGGAGCTACGCAATCACAAAGGTCACTTCTTCAGTCAAGTGCAGCAGATGGGATCTTGAAA	TTTCAAGATCCCATCTGCTGCACTTGACTGAAGAAGTGACCTTTGTGATTGCGTAGCTCCTAAAAAAAAAAAAAAAAAAAAAAAAGTGACGCGGTCATTTAACTCAGCTGCAACTTTTCA[C/T]GGAAATGCAGGAAAGACTAACTCATTGAATGATCAGTTGCCTACTTGGAATGCAATAAGTGGCTTCCACAGCTTATTTTTGTTTTCCAATAGAAAATCACAGCCTGCGGATGATCAGTGT	C	T	0.639868	0.00899541	0.360132	0.00899541	0.399413	0.0061918	0.48091	0.0061918	0.119677	0.0061918	1362	2	0.354672	0.48091	0.460874	2.57427	0.108614	0.1114	544	655	163	0.96566	10	115797006			35	153	intron	C/T	0.465374	0.126941	YES	2	2	2	1	reference
ADRB2_rs1042713	ADRB2	http://www.ncbi.nlm.nih.gov/entrez/query.fcgi?db=gene&cmd=Retrieve&dopt=full_report&list_uids=154	rs1042713		http://www.ncbi.nlm.nih.gov/SNP/snp_ref.cgi?rs=1042713	A	G	GCCCGCAGAGCCCCGCCGTGGGTCCGCCCGCTGAGGCGCCCCCAGCCAGTGCGCTCACCTGCCAGACTGCGCGCCATGGGGCAACCCGGGAACGGCAGCGCCTTCTTGCTGGCACCCAAT[A/G]GAAGCCATGCGCCGGACCACGACGTCACGCAGGAAAGGGACGAGGTGTGGGTGGTGGGCATGGGCATCGTCATGTCTCTCATCGTCCTGGCCATCGTGTTTGGCAATGTGCTGGTCATCA	GCCCGCAGAGCCCCGCCGTGGGTCCGCCCGCTGAGGCGCCCCCAGCCAGTGCGCTCACCTGCCAGACTGCGCGCCATGGGGCAACCCGGGAACGGCAGCGCCTTCTTGCTGGCACCCAAT[A/G]GAAGCCATGCGCCGGACCACGACGTCACGCAGGAAAGGGACGAGGTGTGGGTGGTGGGCATGGGCATCGTCATGTCTCTCATCGTCCTGGCCATCGTGTTTGGCAATGTGCTGGTCATCA	A	G	0.371512	0.00917077	0.628488	0.00917077	0.133627	0.00630878	0.475771	0.00630878	0.390602	0.00630878	1362	2	0.357946	0.475771	0.466982	0.482455	0.487312	0.522	182	648	532	0.83694	5	148186633	-2678		35	154	coding-nonsynon	A/G	0.477189	0.104332	YES	2	2	2	1	reference
ADRB2_rs1432622	ADRB2	http://www.ncbi.nlm.nih.gov/entrez/query.fcgi?db=gene&cmd=Retrieve&dopt=full_report&list_uids=154	rs1432622		http://www.ncbi.nlm.nih.gov/SNP/snp_ref.cgi?rs=1432622	A	G	CAGAAACAGAATTTAACCTACATATCCCCTTTAACATCCTTCATAGCAGAAACTGACTTTTTGCAAGACAGATGCCTTAGAAAACAAGTATTTCCCATAAAATCCACAAATATGAATTAA[A/G]GATCTATTATATTCACATAGTTTTCAAAATACACTCACCTCATATTTGTGTTTTCCAAAATTGGCTGTGGCATGATGCATTTTAGGAAGAGGCAGTATTTATTATGCAACAACGTTTCTT	AAGAAACGTTGTTGCATAATAAATACTGCCTCTTCCTAAAATGCATCATGCCACAGCCAATTTTGGAAAACACAAATATGAGGTGAGTGTATTTTGAAAACTATGTGAATATAATAGATC[C/T]TTAATTCATATTTGTGGATTTTATGGGAAATACTTGTTTTCTAAGGCATCTGTCTTGCAAAAAGTCAGTTTCTGCTATGAAGGATGTTAAAGGGGATATGTAGGTTAAATTCTGTTTCTG	C	T	0.453744	0.00947637	0.546256	0.00947637	0.202643	0.00671403	0.502203	0.00671403	0.295154	0.00671403	1362	2	0.372851	0.502203	0.495721	0.232859	0.629412	0.6667	276	684	402	0.949371	5	148183955	3123		35	154	locus-region,5'	C/T	0.496528	0.0415217	YES	2	2	2	1	reference
ADRB2_rs1800888	ADRB2	http://www.ncbi.nlm.nih.gov/entrez/query.fcgi?db=gene&cmd=Retrieve&dopt=full_report&list_uids=154	rs1800888		http://www.ncbi.nlm.nih.gov/SNP/snp_ref.cgi?rs=1800888	A	G	GAAGAGGCAATGGCATAGGCTTGGTTCGTGAAGAAGTCACAGCAGGTCTCATTGGCATAGCAGTTGATGGCTTCCTGGTGGGTGGCCCGGTACCAGTGCATCTGAATGGGCAAGAAGGAG[A/G]TAAGGCCTGACACAATCCACACCATCAGAATGATCACCCGGGCCTTATTCTTGGTCAGCAGGCTCTGGTACTTGAAAGGTGAAGTAATGGCAAAGTAGCGATCCACTGCGATCACGCACA	TGTGCGTGATCGCAGTGGATCGCTACTTTGCCATTACTTCACCTTTCAAGTACCAGAGCCTGCTGACCAAGAATAAGGCCCGGGTGATCATTCTGATGGTGTGGATTGTGTCAGGCCTTA[C/T]CTCCTTCTTGCCCATTCAGATGCACTGGTACCGGGCCACCCACCAGGAAGCCATCAACTGCTATGCCAATGAGACCTGCTGTGACTTCTTCACGAACCAAGCCTATGCCATTGCCTCTTC	C	T	0.00844347	0.00174566	0.991557	0.00174566			0.0168869	2.94788e-05	0.983113	2.94788e-05	1362	2	0.0166042	0.0168869	0.0167443	0.0987606	0.753322	1	0	23	1339	0.656496	5	148187078			35	154	coding-nonsynon	C/T	0.0139853	0.0824441	YES	2	2	2	1	reference
ADRB3_rs2071493	ADRB3	http://www.ncbi.nlm.nih.gov/entrez/query.fcgi?db=gene&cmd=Retrieve&dopt=full_report&list_uids=155	rs2071493		http://www.ncbi.nlm.nih.gov/SNP/snp_ref.cgi?rs=2071493	A	G	GCCTGTGAGTGCAGATGTGTGCCCTCCCGCTCCCTGGGCTGGGTTGGAGTAGGGATGGGGTGGGGCGTGTGTGGCTGGGTGGTGCCCTGGCGTTTTTGTGTAACTA[A/G]ATATGCGTTCCAGGGTCTCTGATCTCTGTCATTCCCCTCAGTGCACCTGTTGCTCCTTTCACCCCAGGGTCTATTATCTCCACTTTTTTTCCCAGGGCTTCTTGG	GCCTGTGAGTGCAGATGTGTGCCCTCCCGCTCCCTGGGCTGGGTTGGAGTAGGGATGGGGTGGGGCGTGTGTGGCTGGGTGGTGCCCTGGCGTTTTTGTGTAACTA[A/G]ATATGCGTTCCAGGGTCTCTGATCTCTGTCATTCCCCTCAGTGCACCTGTTGCTCCTTTCACCCCAGGGTCTATTATCTCCACTTTTTTTCCCAGGGCTTCTTGG	A	G	0.926946	0.00492423	0.0730543	0.00492423	0.857562	0.00157258	0.138767	0.00157258	0.00367107	0.00157258	1362	2	0.126264	0.138767	0.135435	0.824243	0.363942	0.5446	1168	189	5	0.859488	8	37941010	1945		35	155	intron	A/G	0.28875	0.246979	YES	2	2	2	1	reference
ADRB3_rs4994	ADRB3	http://www.ncbi.nlm.nih.gov/entrez/query.fcgi?db=gene&cmd=Retrieve&dopt=full_report&list_uids=155	rs4994		http://www.ncbi.nlm.nih.gov/SNP/snp_ref.cgi?rs=4994	A	G	GCCAGTGGCCAGTCAGCGCCAAGGTGGCCGCCGGCGGCACCACCARGAGTCCCATCACCAGGTCGGCTGCGGCCAGCGAAGTCACGAACACGTTGGTCATGGTCTGGAGTCTCGGAGTCC[A/G]GGCGATGGCCACGATGACCAGCAGGTTGCCTCCCACGGTGGCCAGCACCGCCAGCGCCAGCAGGGCCCCGGCTAGGGCCGCCTCCCACGGAACCCCTGGCAGCCCACTGGTGTTGGCGGT	ACCGCCAACACCAGTGGGCTGCCAGGGGTTCCGTGGGAGGCGGCCCTAGCCGGGGCCCTGCTGGCGCTGGCGGTGCTGGCCACCGTGGGAGGCAACCTGCTGGTCATCGTGGCCATCGCC[C/T]GGACTCCGAGACTCCAGACCATGACCAACGTGTTCGTGACTTCGCTGGCCGCAGCCGACCTGGTGATGGGACTCYTGGTGGTGCCGCCGGCGGCCACCTTGGCGCTGACTGGCCACTGGC	C	T	0.92511	0.00497217	0.0748899	0.00497217	0.853891	0.00157896	0.142438	0.00157896	0.00367107	0.00157896	1362	2	0.128963	0.142438	0.138563	1.0651	0.302054	0.435	1163	194	5	0.937674	8	37942955			35	155	coding-nonsynon	C/T	0.224796	0.248726	YES	2	2	2	1	reference
ADRB3_rs4997	ADRB3	http://www.ncbi.nlm.nih.gov/entrez/query.fcgi?db=gene&cmd=Retrieve&dopt=full_report&list_uids=155	rs4997		http://www.ncbi.nlm.nih.gov/SNP/snp_ref.cgi?rs=4997	A	C	CCTCGTTCCCTTTTCTCTCCAAGCAAAGCCATCCCACCTTCTCTTAATAAACTCCACACTCAAAAAGTTGACCCACGGACACATCGCATGCTTCCCGACCCTGAGCCGCCGGTCCCTCTG[A/C]CCCGGTTACCTACCCGTCGAGCCGTTGGCAAAGCCTGGGCTGCGCTGGGCTGCTCCGGGCCGCAGGAACGCCCGAGGGGAAGAGGGCCGGGCGGGCGGCGGCGCAGGGCTCCGGAGGCAG	CTGCCTCCGGAGCCCTgcgccgccgcccgcccggcccTCTTCCCCTCGGGCGTTCCTGCGGCCCGGAGCAGCCCAGCGCAGCCCAGGCTTTGCCAACGGCTCGACGGGTAGGTAACCGGG[G/T]CAGAGGGACCGGCGGCTCAGGGTCGGGAAGCATGCGATGTGTCCGTGGGTCAACTTTTTGAGTGTGGAGTTTATTAAGAGAAGGTGGGATGGCTTTGCTTGGAGAGAAAAGGGAACGAGG	G	T	0.0726872	0.00491452	0.927313	0.00491452	0.00367107	0.00157136	0.138032	0.00157136	0.858297	0.00157136	1362	2	0.125721	0.138032	0.134808	0.779351	0.37734	0.5504	5	188	1169	0.919967	8	37941926	-1283		35	155	intron	G/T			YES	2	2	2	1	reference
ADRB3_rs4998	ADRB3	http://www.ncbi.nlm.nih.gov/entrez/query.fcgi?db=gene&cmd=Retrieve&dopt=full_report&list_uids=155	rs4998		http://www.ncbi.nlm.nih.gov/SNP/snp_ref.cgi?rs=4998	C	G	GGTTTGGGTGGCAGAAGGAATGGAACCAGGGGAGCTCTCTTTGCCCTAAGCACTCACTGACTGCACAGGCAAGCCGGGTGATGGGTGCCCCTACCAAAGCCAGCCTGCTGCTCCACGGCA[C/G]CTGGACACTACCACTGAGGGAGGAGTGAAGTTCAAGGCTGGGGTTTAGAAAACATCTCTCAGACAGAGAGCAAGAGGATGGTGAAAACCCACTTGGTAAGGATCCCTCCTTGGGTCACAT	ATGTGACCCAAGGAGGGATCCTTACCAAGTGGGTTTTCACCATCCTCTTGCTCTCTGTCTGAGAGATGTTTTCTAAACCCCAGCCTTGAACTTCACTCCTCCCTCAGTGGTAGTGTCCAG[C/G]TGCCGTGGAGCAGCAGGCTGGCTTTGGTAGGGGCACCCATCACCCGGCTTGCCTGTGCAGTCAGTGAGTGCTTAGGGCAAAGAGAGCTCCCCTGGTTCCATTCCTTCTGCCACCCAAACC	C	G	0.926946	0.00492423	0.0730543	0.00492423	0.857562	0.00157258	0.138767	0.00157258	0.00367107	0.00157258	1362	2	0.126264	0.138767	0.135435	0.824243	0.363942	0.5523	1168	189	5	0.83114	8	37940643	-1393		35	155	mrna-utr	C/G	0.152	0.140389	YES	2	2	2	1	reference
ADRB3_rs9694197	ADRB3	http://www.ncbi.nlm.nih.gov/entrez/query.fcgi?db=gene&cmd=Retrieve&dopt=full_report&list_uids=155	rs9694197		http://www.ncbi.nlm.nih.gov/SNP/snp_ref.cgi?rs=9694197	A	G	ATGTTGGGAGAATATCCAGAGATGGGGAGAGGAGGGCCTCTTATTTGTCAAGCAAGACTTCCTCCTCCACTAACAGCCACAAAGTTGAGTCTTTGCCAAGAAATCTTGCACACCTCAGAC[A/G]CCAGAGATCTCACCCTGCCCTGGTTGAAAAGGAGAAAGTCATCTTTGGTATGAAAACATCCTGAGAAATAAAACCTGGGCTCCTGGAGAAAAGAGAGCAGCACAGACCAGGTCCAATTCA	ATGTTGGGAGAATATCCAGAGATGGGGAGAGGAGGGCCTCTTATTTGTCAAGCAAGACTTCCTCCTCCACTAACAGCCACAAAGTTGAGTCTTTGCCAAGAAATCTTGCACACCTCAGAC[A/G]CCAGAGATCTCACCCTGCCCTGGTTGAAAAGGAGAAAGTCATCTTTGGTATGAAAACATCCTGAGAAATAAAACCTGGGCTCCTGGAGAAAAGAGAGCAGCACAGACCAGGTCCAATTCA	A	G	0.922173	0.00510004	0.0778267	0.00510004	0.849486	0.00181686	0.145374	0.00181686	0.0051395	0.00181686	1362	2	0.133238	0.145374	0.143539	0.22259	0.637074	0.8496	1157	198	7	0.697297	8	37939250	-5680050		35	155	locus-region	A/G			NO	2	2	2	1	reference
AGER_rs1035798	AGER	http://www.ncbi.nlm.nih.gov/entrez/query.fcgi?db=gene&cmd=Retrieve&dopt=full_report&list_uids=177	rs1035798		http://www.ncbi.nlm.nih.gov/SNP/snp_ref.cgi?rs=1035798	A	G	TTATTGGGAACACCAGCCGTGAGTTCAGAGGCAGAATCTACAATTTCTGGCTTCCCAGGAATCTCTGAAGGAGGAAAAATCCAGTCAGAGGCTGTAATTGTGAAGGTTCTCAAACTCTGT[A/G]TGTGGAAATGAGGCCAGTGGAAGTCAGAGGCCCTCATGGGCCAAGGCTGGGGTTGAAGGCTTTTTCTTAGGTAAGAGGGAGGCCTTGGAGAAGACCCTGGAATTCTTACGGTAGACACGG	CCGTGTCTACCGTAAGAATTCCAGGGTCTTCTCCAAGGCCTCCCTCTTACCTAAGAAAAAGCCTTCAACCCCAGCCTTGGCCCATGAGGGCCTCTGACTTCCACTGGCCTCATTTCCACA[C/T]ACAGAGTTTGAGAACCTTCACAATTACAGCCTCTGACTGGATTTTTCCTCCTTCAGAGATTCCTGGGAAGCCAGAAATTGTAGATTCTGCCTCTGAACTCACGGCTGGTGTTCCCAATAA	C	T	0.245595	0.00809631	0.754405	0.00809631	0.0535977	0.00488812	0.383994	0.00488812	0.562408	0.00488812	1362	2	0.3019	0.383994	0.370556	1.79124	0.180775	0.1968	73	523	766	0.804159	6	32259200	4359		35	177	intron	C/T	0.253241	0.249979	YES	2	2	2	1	reference
AGER_rs204993	AGER	http://www.ncbi.nlm.nih.gov/entrez/query.fcgi?db=gene&cmd=Retrieve&dopt=full_report&list_uids=177	rs204993		http://www.ncbi.nlm.nih.gov/SNP/snp_ref.cgi?rs=204993	A	G	TCCTTGGCCTCCTCACTAGGATATGGGTTACTCAGGTGGGAGTAGAAATACTCATTTAGGACCTCAGTGGCCTGTTTGCTGAAGTTACGGCGCTTTCGTCTACAGAGGAGGGAGAAGAGC[A/G]GTGAGGAGGATGTTGATGTCCTGGCAGGGCTGTCACATGGCATGACCCCAGAGTCACCATTGTCATGGAGTACCATGTTGTGCAGCATGGCAGCTCAGGGTCTTGGAGAGGAATGGGAAG	CTTCCCATTCCTCTCCAAGACCCTGAGCTGCCATGCTGCACAACATGGTACTCCATGACAATGGTGACTCTGGGGTCATGCCATGTGACAGCCCTGCCAGGACATCAACATCCTCCTCAC[C/T]GCTCTTCTCCCTCCTCTGTAGACGAAAGCGCCGTAACTTCAGCAAACAGGCCACTGAGGTCCTAAATGAGTATTTCTACTCCCACCTGAGTAACCCATATCCTAGTGAGGAGGCCAAGGA	C	T	0.670338	0.0086401	0.329662	0.0086401	0.431718	0.00584157	0.477239	0.00584157	0.0910426	0.00584157	1362	2	0.344301	0.477239	0.44197	8.67329	0.00322909	0.0025	588	650	124	0.872404	6	32263559			35	177	intron	C/T	0.441741	0.160422	YES	2	2	2	1	reference
AGER_rs2269423	AGER	http://www.ncbi.nlm.nih.gov/entrez/query.fcgi?db=gene&cmd=Retrieve&dopt=full_report&list_uids=177	rs2269423		http://www.ncbi.nlm.nih.gov/SNP/snp_ref.cgi?rs=2269423	A	C	AATCAGCAGAAAGTCCACAGCTGAAGGACCCGGATGAAGCGAGCCTAGGACTTTGAAGTGCAAGCCTCGCCAATTGTAGAGCAGTCACCATGGCGACAAGATAGGGGTGAAGAGGTGGAA[A/C]AAGAGAAGGTTAAACCCTCACAGGATTGGCCCACCCCCGTCCCGCCGCGTGCTGCGCAGGCGCGTTTTACCTAACCACCATTTTCCGTCAAGTTTTAGCCAATGAGTTGATTTGGAGCCA	TGGCTCCAAATCAACTCATTGGCTAAAACTTGACGGAAAATGGTGGTTAGGTAAAACGCGCCTGCGCAGCACGCGGCGGGACGGGGGTGGGCCAATCCTGTGAGGGTTTAACCTTCTCTT[G/T]TTCCACCTCTTCACCCCTATCTTGTCGCCATGGTGACTGCTCTACAATTGGCGAGGCTTGCACTTCAAAGTCCTAGGCTCGCTTCATCCGGGTCCTTCAGCTGTGGACTTTCTGCTGATT	G	T	0.3058	0.00885282	0.6942	0.00885282	0.0947137	0.00576365	0.422173	0.00576365	0.483113	0.00576365	1362	2	0.334442	0.422173	0.424573	0.0435088	0.83477	0.8477	129	575	658	0.961374	6	32253685	194904477		35	177	mrna-utr	G/T	0.452919	0.146027	YES	2	2	2	1	reference
AGTR1_rs17230483	AGTR1	http://www.ncbi.nlm.nih.gov/entrez/query.fcgi?db=gene&cmd=Retrieve&dopt=full_report&list_uids=185	rs17230483	rs2640539	http://www.ncbi.nlm.nih.gov/SNP/snp_ref.cgi?rs2640539	C	G	TGGCACCCTATTGATCTATTTTATTACTTTGTTGAGCAACTTGTGCTTCC[C/G]GCTGAAGATGCTGCATCCCAACATGATTCTCTTATTATTAGTTACCACCT	TGGCACCCTATTGATCTATTTTATTACTTTGTTGAGCAACTTGTGCTTCC[C/G]GCTGAAGATGCTGCATCCCAACATGATTCTCTTATTATTAGTTACCACCT	C	G	0.178414	0.00742048	0.821586	0.00742048	0.0352423	0.00409915	0.286344	0.00409915	0.678414	0.00409915	1362	2	0.250192	0.286344	0.293165	0.737395	0.390497	0.4023	48	390	924	0.909754	3	149899732	703		35.1	185	untranslated	C/G	0.453318	0.145471	YES					reference
AGTR1_rs17230574	AGTR1	http://www.ncbi.nlm.nih.gov/entrez/query.fcgi?db=gene&cmd=Retrieve&dopt=full_report&list_uids=185	rs17230574	rs2638362	http://www.ncbi.nlm.nih.gov/SNP/snp_ref.cgi?rs2638362	A	G	GTGACTCCGTGGAACATTTAGTAAAAGAAAACAAGGATGCGTTAGGTGCC[A/G]TCCATACTGTCAAAGGAGTTATAATCTCACGAGGAGGGGAAAGGAGCAGT	ACTGCTCCTTTCCCCTCCTCGTGAGATTATAACTCCTTTGACAGTATGGA[C/T]GGCACCTAACGCATCCTTGTTTTCTTTTACTAAATGTTCCACGGAGTCAC	C	T	0.338106	0.00921585	0.661894	0.00921585	0.12188	0.00610829	0.432452	0.00610829	0.445668	0.00610829	1362	2	0.347416	0.432452	0.44758	1.556	0.212252	0.2284	166	589	607	0.910505	3	149903206	6099		35.1	185	untranslated	C/T	0.496378	0.0423989	YES					reference
AGTR1_rs17230701	AGTR1	http://www.ncbi.nlm.nih.gov/entrez/query.fcgi?db=gene&cmd=Retrieve&dopt=full_report&list_uids=185	rs17230701	rs12721312	http://www.ncbi.nlm.nih.gov/SNP/snp_ref.cgi?rs12721312	A	G	GCACAACATATTCAGAATAGGACAAGCTACTCTTCATTTTCCCTGGAGGG[A/G]ACTAGGAGAAGCTGAGGGCTTGTTCTTTGAACTGAGTTTTTGTAAGGAGG	CCTCCTTACAAAAACTCAGTTCAAAGAACAAGCCCTCAGCTTCTCCTAGT[C/T]CCCTCCAGGGAAAATGAAGAGTAGCTTGTCCTATTCTGAATATGTTGTGC	C	T	0.000734754	0.000519168	0.999265	0.000519168			0.00146951	7.62921e-07	0.99853	7.62921e-07	1361	2	0.00146735	0.00146951	0.00146843	0.000735835	0.978359	1	0	2	1359	0.793798	3	149909305	6117		35.1	185	untranslated	C/T	0.249132	0.249999	YES					reference
AGTR1_rs17230820	AGTR1	http://www.ncbi.nlm.nih.gov/entrez/query.fcgi?db=gene&cmd=Retrieve&dopt=full_report&list_uids=185	rs17230820	rs3772625	http://www.ncbi.nlm.nih.gov/SNP/snp_ref.cgi?rs3772625	A	G	GCTGTGCAACATTGCCACTAGATTATTTTTAATGAAAGCTTTGCCCTTTT[A/G]GATAAATACAGCAATGTATTCAAACAAGTCCTAGGGATACCACTGAGTGC	GCTGTGCAACATTGCCACTAGATTATTTTTAATGAAAGCTTTGCCCTTTT[A/G]GATAAATACAGCAATGTATTCAAACAAGTCCTAGGGATACCACTGAGTGC	A	G	0.840308	0.00713802	0.159692	0.00713802	0.71072	0.00384324	0.259178	0.00384324	0.0301028	0.00384324	1362	2	0.232366	0.259178	0.26838	1.60144	0.205699	0.22	968	353	41	0.837754	3	149915422	1665		35.1	185	untranslated	A/G	0.463477	0.130106	YES					reference
AGTR1_rs17230841	AGTR1	http://www.ncbi.nlm.nih.gov/entrez/query.fcgi?db=gene&cmd=Retrieve&dopt=full_report&list_uids=185	rs17230841	rs12721263	http://www.ncbi.nlm.nih.gov/SNP/snp_ref.cgi?rs12721263	A	T	CAGTGGCAGAAGGATTTGAAGGAAGTTGTGATGAACTAGCTTATTTTTTT[A/T]AATTAGGAATGAAAACTTCTTGTTTAAGGTTATGTATTGCATATTCTCAA	TTGAGAATATGCAATACATAACCTTAAACAAGAAGTTTTCATTCCTAATT[A/T]AAAAAAATAAGCTAGTTCATCACAACTTCCTTCAAATCCTTCTGCCACTG	A	T			1	0					1	1.49167e-154	1362	1	0	0	0	0			0	0	1362	0.851775	3	149917087	3106		35.1	185	untranslated	A/T	0.0867769	0.189363	YES					reference
AGTR1_rs17230896	AGTR1	http://www.ncbi.nlm.nih.gov/entrez/query.fcgi?db=gene&cmd=Retrieve&dopt=full_report&list_uids=185	rs17230896	rs1492099	http://www.ncbi.nlm.nih.gov/SNP/snp_ref.cgi?rs1492099	A	G	GGCCCCACCCCAGACCGAGATAGAATCTGCATTTCAAGCAGATTCCCCAG[A/G]TGACTTGGGTGTTCATTAGAGTTTGAGAAGCACTAGTCTAGAGGCACATG	CATGTGCCTCTAGACTAGTGCTTCTCAAACTCTAATGAACACCCAAGTCA[C/T]CTGGGGAATCTGCTTGAAATGCAGATTCTATCTCGGTCTGGGGTGGGGCC	C	T	0.139868	0.0067334	0.860132	0.0067334	0.0227606	0.00344048	0.234214	0.00344048	0.743025	0.00344048	1362	2	0.211663	0.234214	0.24061	0.962206	0.326632	0.3154	31	319	1012	0.948518	3	149920193	2285		35.1	185	untranslated	C/T	0.15879	0.232768	YES					reference
AGTR1_rs17230917	AGTR1	http://www.ncbi.nlm.nih.gov/entrez/query.fcgi?db=gene&cmd=Retrieve&dopt=full_report&list_uids=185	rs17230917	rs4524238	http://www.ncbi.nlm.nih.gov/SNP/snp_ref.cgi?rs4524238	A	G	GAAAAATTTAGCCCTAGACTAATTGCTGCTCTGGTACCACCTAAGAAACC[A/G]TAAAAGTCAGACTCAAAAGAATTAAATTATTTGCAAGTAACTCAACTGCT	GAAAAATTTAGCCCTAGACTAATTGCTGCTCTGGTACCACCTAAGAAACC[A/G]TAAAAGTCAGACTCAAAAGAATTAAATTATTTGCAAGTAACTCAACTGCT	A	G	0.178047	0.00736317	0.821953	0.00736317	0.0330396	0.00401636	0.290015	0.00401636	0.676946	0.00401636	1362	2	0.249858	0.290015	0.292693	0.114004	0.735631	0.7063	45	395	922	0.968703	3	149922478	7968		35.1	185	untranslated	A/G	0.484198	0.0874729	YES					reference
AGTR1_rs17231014	AGTR1	http://www.ncbi.nlm.nih.gov/entrez/query.fcgi?db=gene&cmd=Retrieve&dopt=full_report&list_uids=185	rs17231014	rs388915	http://www.ncbi.nlm.nih.gov/SNP/snp_ref.cgi?rs388915	A	G	ACTTCTAGCACCACGTGTAGTTTCCCAATTTCTCTTACCCAAATTTGCTC[A/G]CAGGGAAAAAAATAAATTAAATTAGCCATTTACACCACAGTGTGAACTTA	ACTTCTAGCACCACGTGTAGTTTCCCAATTTCTCTTACCCAAATTTGCTC[A/G]CAGGGAAAAAAATAAATTAAATTAGCCATTTACACCACAGTGTGAACTTA	A	G	0.737885	0.00854422	0.262115	0.00854422	0.549927	0.00532442	0.375918	0.00532442	0.0741557	0.00532442	1362	2	0.312006	0.375918	0.386821	1.0821	0.298228	0.2947	749	512	101	0.948826	3	149930446	6721		35.1	185	untranslated	A/G	0.497873	0.0325393	YES					reference
AGTR1_rs17231147	AGTR1	http://www.ncbi.nlm.nih.gov/entrez/query.fcgi?db=gene&cmd=Retrieve&dopt=full_report&list_uids=185	rs17231147	rs7630821	http://www.ncbi.nlm.nih.gov/SNP/snp_ref.cgi?rs7630821	A	G	TTGGGGTTGAAAGACTTGAAATGGAATCCTCCTTTGCCACGTACAAATCT[A/G]TGTGGCTCTGGGTAAGTCATCCAATTTCTCTGAACATGACCCTCAGTTTT	AAAACTGAGGGTCATGTTCAGAGAAATTGGATGACTTACCCAGAGCCACA[C/T]AGATTTGTACGTGGCAAAGGAGGATTCCATTTCAAGTCTTTCAACCCCAA	C	T	0.0524963	0.00431232	0.947504	0.00431232	0.00367107	0.00153433	0.0976505	0.00153433	0.898678	0.00153433	1362	2	0.0945327	0.0976505	0.0994809	0.461101	0.49711	0.4165	5	133	1224	0.892351	3	149937167	1311		35.1	185	untranslated	C/T	0.0886966	0.191001	YES					reference
AGTR1_rs17231161	AGTR1	http://www.ncbi.nlm.nih.gov/entrez/query.fcgi?db=gene&cmd=Retrieve&dopt=full_report&list_uids=185	rs17231161	rs12721232	http://www.ncbi.nlm.nih.gov/SNP/snp_ref.cgi?rs12721232	A	G	TAATACAATTTCTGTGGGAAAAAGTCTGCCTTTGTGAGGATCAATTTATA[A/G]GCATAGTTTTGTACTCCAACTCCTTCACAAGCTATCAGCCTTTTTTTCAG	CTGAAAAAAAGGCTGATAGCTTGTGAAGGAGTTGGAGTACAAAACTATGC[C/T]TATAAATTGATCCTCACAAAGGCAGACTTTTTCCCACAGAAATTGTATTA	C	T	0.0903084	0.00563445	0.909692	0.00563445	0.0124816	0.0026597	0.155653	0.0026597	0.831865	0.0026597	1362	2	0.150807	0.155653	0.164306	3.77672	0.0519706	0.0682	17	212	1133	0.86642	3	149938478	146		35.1	185	untranslated	C/T	0.258034	0.249871	YES					reference
AGTR1_rs17231175	AGTR1	http://www.ncbi.nlm.nih.gov/entrez/query.fcgi?db=gene&cmd=Retrieve&dopt=full_report&list_uids=185	rs17231175	rs12721234	http://www.ncbi.nlm.nih.gov/SNP/snp_ref.cgi?rs12721234	A	G	CTATGAGAACAGGGAGGAAATTTTCTTCTCCTTCTCTCTCCTCTTGACTC[A/G]ACTTTGACAGCACACAACTCATGTGGGTTCCATTAATCCTATGTTTGGAG	CTCCAAACATAGGATTAATGGAACCCACATGAGTTGTGTGCTGTCAAAGT[C/T]GAGTCAAGAGGAGAGAGAAGGAGAAGAAAATTTCCTCCCTGTTCTCATAG	C	T	0.000734214	0.000518787	0.999266	0.000518787			0.00146843	7.61801e-07	0.998532	7.61801e-07	1362	2	0.00146627	0.00146843	0.00146735	0.000735294	0.978367	1	0	2	1360	0.79349	3	149938624	693		35.1	185	untranslated	C/T	0.193762	0.243592	YES					reference
AGTR1_rs17231189	AGTR1	http://www.ncbi.nlm.nih.gov/entrez/query.fcgi?db=gene&cmd=Retrieve&dopt=full_report&list_uids=185	rs17231189	rs12695918	http://www.ncbi.nlm.nih.gov/SNP/snp_ref.cgi?rs12695918	A	G	TGAATGGGTGAGCAGCATAGAACTTACAGCCATGAATATAGTGTATCGAG[A/G]CTAATTTCTGTGAAATCACATGTTGCTCCTTGCAGAGTTTCACAGAGAAT	ATTCTCTGTGAAACTCTGCAAGGAGCAACATGTGATTTCACAGAAATTAG[C/T]CTCGATACACTATATTCATGGCTGTAAGTTCTATGCTGCTCACCCATTCA	C	T	0.999266	0.000518787	0.000734214	0.000518787	0.998532	7.61801e-07	0.00146843	7.61801e-07			1362	2	0.00146627	0.00146843	0.00146735	0.000735294	0.978367	1	1360	2	0	0.900772	3	149939317	1218		35.1	185	untranslated	C/T	0.21875	0.248039	YES					reference
AGTR1_rs17231210	AGTR1	http://www.ncbi.nlm.nih.gov/entrez/query.fcgi?db=gene&cmd=Retrieve&dopt=full_report&list_uids=185	rs17231210	rs12695921	http://www.ncbi.nlm.nih.gov/SNP/snp_ref.cgi?rs12695921	A	G	AAGCCATGCAAATATTTGCTCTGATTTTCTACATAATCAACAGTCAAGCT[A/G]TTCATTTATGTGATTTAGAAAATCAACACATTCTGCCCTGGATAACAGTC	GACTGTTATCCAGGGCAGAATGTGTTGATTTTCTAAATCACATAAATGAA[C/T]AGCTTGACTGTTGATTATGTAGAAAATCAGAGCAAATATTTGCATGGCTT	C	T	0.998164	0.000819369	0.00183554	0.000819369	0.996329	3.00796e-06	0.00367107	3.00796e-06			1362	2	0.00365762	0.00367107	0.00366433	0.00460573	0.945893	1	1357	5	0	0.96729	3	149940535			35.1	185	untranslated	C/T	0.46142	0.133423	YES					reference
AGTR1_rs17236869	AGTR1	http://www.ncbi.nlm.nih.gov/entrez/query.fcgi?db=gene&cmd=Retrieve&dopt=full_report&list_uids=185	rs17236869	rs12695864	http://www.ncbi.nlm.nih.gov/SNP/snp_ref.cgi?rs12695864	A	G	GCAGGCTGGCACTATGGAGATGTTTACCTGGACATTTAAGAAAATTGGAG[A/G]ATGGAGTTGGGTGTCTGGGCAGTGGCCTGCCAGAGGCTCTGTTTAGTCCT	AGGACTAAACAGAGCCTCTGGCAGGCCACTGCCCAGACACCCAACTCCAT[C/T]CTCCAATTTTCTTAAATGTCCAGGTAAACATCTCCATAGTGCCAGCCTGC	C	T	0.00183554	0.000819369	0.998164	0.000819369			0.00367107	3.00796e-06	0.996329	3.00796e-06	1362	2	0.00365762	0.00367107	0.00366433	0.00460573	0.945893	1	0	5	1357	0.806492	3	149899359	4584		35.1	185	untranslated	C/T	0.21875	0.248039	YES					reference
AGTR1_rs17237008	AGTR1	http://www.ncbi.nlm.nih.gov/entrez/query.fcgi?db=gene&cmd=Retrieve&dopt=full_report&list_uids=185	rs17237008	rs12721279	http://www.ncbi.nlm.nih.gov/SNP/snp_ref.cgi?rs12721279	A	G	CCCTGTCTCGAATAATAATAATAATAATAATAACAACTTTTGATATCTCT[A/G]TTTTTTCCCATAAAAATCCAAAATTTTCTGTTTACTTTTTGGTGCTCTCA	CCCTGTCTCGAATAATAATAATAATAATAATAACAACTTTTGATATCTCT[A/G]TTTTTTCCCATAAAAATCCAAAATTTTCTGTTTACTTTTTGGTGCTCTCA	A	G	0.517254	0.00958268	0.482746	0.00958268	0.267988	0.00676605	0.498532	0.00676605	0.23348	0.00676605	1362	2	0.374702	0.498532	0.499405	0.00416222	0.94856	0.9556	365	679	318	0.849935	3	149904881	4594		35.1	185	untranslated	A/G	0.380494	0.21324	YES					reference
AGTR1_rs17237078	AGTR1	http://www.ncbi.nlm.nih.gov/entrez/query.fcgi?db=gene&cmd=Retrieve&dopt=full_report&list_uids=185	rs17237078	rs12721315	http://www.ncbi.nlm.nih.gov/SNP/snp_ref.cgi?rs12721315	A	C	TCTTCTTTGCTGTAACAGATTGGCAAGTAGGAATCATTTTCTGGAAGGTA[A/C]TCCACAGTGGTGGTGTTAGAAAACTATTTAGAATGCCTTTAATCTTGGAG	TCTTCTTTGCTGTAACAGATTGGCAAGTAGGAATCATTTTCTGGAAGGTA[A/C]TCCACAGTGGTGGTGTTAGAAAACTATTTAGAATGCCTTTAATCTTGGAG	A	C	0.157122	0.00705671	0.842878	0.00705671	0.0279001	0.00373886	0.258443	0.00373886	0.713656	0.00373886	1362	2	0.229791	0.258443	0.264869	0.801601	0.370615	0.3611	38	352	972	0.921443	3	149909475	1571		35.1	185	untranslated	A/C	0.352316	0.228104	YES					reference
AGTR1_rs17237113	AGTR1	http://www.ncbi.nlm.nih.gov/entrez/query.fcgi?db=gene&cmd=Retrieve&dopt=full_report&list_uids=185	rs17237113	rs2638360	http://www.ncbi.nlm.nih.gov/SNP/snp_ref.cgi?rs2638360	A	G	CTTACTCATTACCTTCTGTAAAATTCTGTAAGATTTTCTTTAGTTTTCCA[A/G]TAATGATAAACATTTCACCATTGCATAGACATAATTAATTGATTTTTTAA	CTTACTCATTACCTTCTGTAAAATTCTGTAAGATTTTCTTTAGTTTTCCA[A/G]TAATGATAAACATTTCACCATTGCATAGACATAATTAATTGATTTTTTAA	A	G	0.82232	0.00741526	0.17768	0.00741526	0.679883	0.0040969	0.284875	0.0040969	0.0352423	0.0040969	1362	2	0.249523	0.284875	0.292219	0.860319	0.353649	0.3568	926	388	48	0.93721	3	149911046	20800		35.1	185	untranslated	A/G	0.253508	0.249975	YES					reference
AGTR1_rs17237400	AGTR1	http://www.ncbi.nlm.nih.gov/entrez/query.fcgi?db=gene&cmd=Retrieve&dopt=full_report&list_uids=185	rs17237400	rs385338	http://www.ncbi.nlm.nih.gov/SNP/snp_ref.cgi?rs385338	C	G	CAGTTTGTACCCAAACATTTGCTGCCACAAGTAGTAAATGTAGAAGCAAT[C/G]CAATATCTACTATTTTACTTTTCTTTCAGGGTTAATCAAGTGCCTTGTTA	CAGTTTGTACCCAAACATTTGCTGCCACAAGTAGTAAATGTAGAAGCAAT[C/G]CAATATCTACTATTTTACTTTTCTTTCAGGGTTAATCAAGTGCCTTGTTA	C	G	0.169971	0.00739343	0.830029	0.00739343	0.0367107	0.00413163	0.26652	0.00413163	0.696769	0.00413163	1362	2	0.242354	0.26652	0.282161	4.18537	0.0407743	0.0419	50	363	949	0.839034	3	149931846	4725		35.1	185	untranslated	C/G	0.439508	0.163054	YES					reference
AGTR1_rs17237498	AGTR1	http://www.ncbi.nlm.nih.gov/entrez/query.fcgi?db=gene&cmd=Retrieve&dopt=full_report&list_uids=185	rs17237498	rs12695912	http://www.ncbi.nlm.nih.gov/SNP/snp_ref.cgi?rs12695912	A	G	GTTTTAAAAAGAGCTTGTAATGAACAATTTAATTAGATTGGTTTTGGCTT[A/G]CCTAAAAGCTTAAGAAGGTATTAATATTCTAATCAAAAGTCTTGGGAAAG	GTTTTAAAAAGAGCTTGTAATGAACAATTTAATTAGATTGGTTTTGGCTT[A/G]CCTAAAAGCTTAAGAAGGTATTAATATTCTAATCAAAAGTCTTGGGAAAG	A	G	0.0774596	0.00516972	0.92254	0.00516972	0.00734214	0.0021099	0.140235	0.0021099	0.852423	0.0021099	1362	2	0.132706	0.140235	0.142919	0.480462	0.488213	0.4356	10	191	1161	0.899802	3	149936571	-38155180		35.1	185	untranslated	A/G	0.119511	0.213243	YES					reference
AGT_rs11568030	AGT	http://www.ncbi.nlm.nih.gov/entrez/query.fcgi?db=gene&cmd=Retrieve&dopt=full_report&list_uids=183	rs11568030		http://www.ncbi.nlm.nih.gov/SNP/snp_ref.cgi?rs=11568030	A	G	CAGGTCATATTAGATCAGGGCTCACCCTCATGGCCTCATTTTAACTTAATCATCTCTTTAAAGATCCTGTCTCCAAATAATGGTCACATTCTGAGGTCCTGGGGTTGAGGACTTCAACAC[A/G]GGCATTATGGCCGTTGGGGGAGGTAGGACATAATTCAGCTGATATTGGTGCATTTTGCACTTGGATCATGTAGATATTTTCCATGGAGCTTTGAATCCATTTCTTCTTTTTTTTGTAGAC	CAGGTCATATTAGATCAGGGCTCACCCTCATGGCCTCATTTTAACTTAATCATCTCTTTAAAGATCCTGTCTCCAAATAATGGTCACATTCTGAGGTCCTGGGGTTGAGGACTTCAACAC[A/G]GGCATTATGGCCGTTGGGGGAGGTAGGACATAATTCAGCTGATATTGGTGCATTTTGCACTTGGATCATGTAGATATTTTCCATGGAGCTTTGAATCCATTTCTTCTTTTTTTTGTAGAC	A	G	0.041116	0.00382902	0.958884	0.00382902	0.00220264	0.00120738	0.0778267	0.00120738	0.919971	0.00120738	1362	2	0.0757422	0.0778267	0.078851	0.229806	0.631667	0.5048	3	106	1253	0.900701	1	227153578	1859		35	183	mrna-utr	A/G	0.0831758	0.186198	YES	2	2	2	1	reference
AGT_rs2004776	AGT	http://www.ncbi.nlm.nih.gov/entrez/query.fcgi?db=gene&cmd=Retrieve&dopt=full_report&list_uids=183	rs2004776		http://www.ncbi.nlm.nih.gov/SNP/snp_ref.cgi?rs=2004776	A	G	GCTGCAGGGTGAAATACTGCATCAGGGAAACCTCAGGGAAGGTGAGGACTATGGTGAGGTCAGAGGGGTTGATATGAGAACAGTGCCCTGCAAATGGCAGGCACCACAGGAGCATGAGCC[A/G]TCATCTTCACCTTTAGCATTCAGCCCGGGAGAAGTAGGGAGACATAGAAGGGGCAGGTGCTGGCCAAGAGGCAGGGGCAGGAGAGGAGAAGCGGAGGGGCACTCAGGGCGAGGGTGTCAG	GCTGCAGGGTGAAATACTGCATCAGGGAAACCTCAGGGAAGGTGAGGACTATGGTGAGGTCAGAGGGGTTGATATGAGAACAGTGCCCTGCAAATGGCAGGCACCACAGGAGCATGAGCC[A/G]TCATCTTCACCTTTAGCATTCAGCCCGGGAGAAGTAGGGAGACATAGAAGGGGCAGGTGCTGGCCAAGAGGCAGGGGCAGGAGAGGAGAAGCGGAGGGGCACTCAGGGCGAGGGTGTCAG	A	G	0.235316	0.00805401	0.764684	0.00805401	0.0521292	0.00480604	0.366373	0.00480604	0.581498	0.00480604	1362	2	0.295126	0.366373	0.359884	0.442734	0.505806	0.5502	71	499	792	0.94868	1	227155437	-10444		35	183	mrna-utr	A/G	0.482322	0.0923401	YES	2	2	2	1	reference
AGT_rs2067853	AGT	http://www.ncbi.nlm.nih.gov/entrez/query.fcgi?db=gene&cmd=Retrieve&dopt=full_report&list_uids=183	rs2067853		http://www.ncbi.nlm.nih.gov/SNP/snp_ref.cgi?rs=2067853	A	G	TCAAAGGACTGCTAAGTACTGGCTCAGACCTCCCATGGAAATTCCATCCAAAGTCCAGGAAAGCACTTTCGTTTGCACAGTCTATCTGCTGAATTGTATACATCTGTTTGGCTGCTAAAT[A/G]AAAGATAAAATTTTTGGAGGCTTATTGTGGCAAGACGTTTATTACTAACACAAGGGAGAAATAACCAGCTATGGTTCCGCATTCAAACAGAAATTCAGGTGCTTGCATCTTTCACGTATT	AATACGTGAAAGATGCAAGCACCTGAATTTCTGTTTGAATGCGGAACCATAGCTGGTTATTTCTCCCTTGTGTTAGTAATAAACGTCTTGCCACAATAAGCCTCCAAAAATTTTATCTTT[C/T]ATTTAGCAGCCAAACAGATGTATACAATTCAGCAGATAGACTGTGCAAACGAAAGTGCTTTCCTGGACTTTGGATGGAATTTCCATGGGAGGTCTGAGCCAGTACTTAGCAGTCCTTTGA	C	T	0.342511	0.00911043	0.657489	0.00911043	0.118209	0.00610732	0.448605	0.00610732	0.433186	0.00610732	1362	2	0.348967	0.448605	0.450394	0.0214995	0.883426	0.9062	161	611	590	0.884958	1	228904881	6052		35	183	locus-region	C/T	0.306793	0.243464	YES	2	2	2	1	reference
AGT_rs2478543	AGT	http://www.ncbi.nlm.nih.gov/entrez/query.fcgi?db=gene&cmd=Retrieve&dopt=full_report&list_uids=183	rs2478543		http://www.ncbi.nlm.nih.gov/SNP/snp_ref.cgi?rs=2478543	A	G	AGACACTGAGGAGGCTCTGTCAAGATGTTAACCTCGTGAGGGACAGAGAGCCAGGCGGGAGGTGAAAGACAAGACTGTGGAGAAAGAGGTTCAGTGGCGCATAGTGATTTTTCTTACCAC[A/G]ACAACCTCCTTGAGGTCTTTCCCTTCGGGTTCAGGGGGAGGTGATAGATGGGGGGATTGCTCAGCCCTGGCACTGACTGGTCACAGGGGCAGAGGCCAGCCCGAGGGTTGCCCGGTTGAG	AGACACTGAGGAGGCTCTGTCAAGATGTTAACCTCGTGAGGGACAGAGAGCCAGGCGGGAGGTGAAAGACAAGACTGTGGAGAAAGAGGTTCAGTGGCGCATAGTGATTTTTCTTACCAC[A/G]ACAACCTCCTTGAGGTCTTTCCCTTCGGGTTCAGGGGGAGGTGATAGATGGGGGGATTGCTCAGCCCTGGCACTGACTGGTCACAGGGGCAGAGGCCAGCCCGAGGGTTGCCCGGTTGAG	A	G	0.585536	0.00965108	0.414464	0.00965108	0.353891	0.00658707	0.463289	0.00658707	0.182819	0.00658707	1362	2	0.367577	0.463289	0.485367	2.81807	0.0932082	0.0929	482	631	249	0.875907	1	227151045	7806		35	183	intron	A/G	0.460066	0.135544	YES	2	2	2	1	reference
AGT_rs2493137	AGT	http://www.ncbi.nlm.nih.gov/entrez/query.fcgi?db=gene&cmd=Retrieve&dopt=full_report&list_uids=183	rs2493137		http://www.ncbi.nlm.nih.gov/SNP/snp_ref.cgi?rs=2493137	A	G	AGATTTGGGTGGGGACACAGCCAAACCATATCAGATGGCTTATTTGGTTTCTATGTAGAACCTCTGCTTTTCATTCAACAGTCTTCATTTAGCCACAGATAAGCTCTGTCCCTAACTTCC[A/G]CTGATGGAATGTACACATAAGAAACTTCCACTGATGGAATGAACACAGAAGGTGCCTACTGGGAAGAAAACTGGCCTGAATCTGAGCTGGGTCAAATGTCTGCAGTCAGTTTGAATGGCT	AGCCATTCAAACTGACTGCAGACATTTGACCCAGCTCAGATTCAGGCCAGTTTTCTTCCCAGTAGGCACCTTCTGTGTTCATTCCATCAGTGGAAGTTTCTTATGTGTACATTCCATCAG[T/C]GGAAGTTAGGGACAGAGCTTATCTGTGGCTAAATGAAGACTGTTGAATGAAAAGCAGAGGTTCTACATAGAAACCAAATAAGCCATCtgatatggtttggctgtgtccccacccaaatct	T	C	0.691263	0.0088693	0.308737	0.0088693	0.478708	0.00579084	0.42511	0.00579084	0.0961821	0.00579084	1362	2	0.335742	0.42511	0.426837	0.0222943	0.881307	0.8955	652	579	131	0.965499	1	227158851			35	183	locus-region, 5'	C/T	0.497963	0.0318499	YES	2	2	2	1	reference
AGT_rs3789679	AGT	http://www.ncbi.nlm.nih.gov/entrez/query.fcgi?db=gene&cmd=Retrieve&dopt=full_report&list_uids=183	rs3789679		http://www.ncbi.nlm.nih.gov/SNP/snp_ref.cgi?rs=3789679	A	G	AGGACCCTAACTTTTCTCAGCGGAAGCAGGAAGACCTGACCATCTTGTCCTATTGCTGAGGAGGAGCAGCTCCTCCTGTAAGACCCCAGGTGGGCACCGAGTGGGGGAAAGCCCGCGTCC[A/G]GATGACTGGTCTTATGAGAGGGGAGAGGTTTTTCAGTCATCACCGTGCCTCCTCCCGGCCTTTTCCTCCTAGCCCACAGCTCAGTTACATCTGAGAGAGACAAGGCCGAGAAGGAGCTGA	AGGACCCTAACTTTTCTCAGCGGAAGCAGGAAGACCTGACCATCTTGTCCTATTGCTGAGGAGGAGCAGCTCCTCCTGTAAGACCCCAGGTGGGCACCGAGTGGGGGAAAGCCCGCGTCC[A/G]GATGACTGGTCTTATGAGAGGGGAGAGGTTTTTCAGTCATCACCGTGCCTCCTCCCGGCCTTTTCCTCCTAGCCCACAGCTCAGTTACATCTGAGAGAGACAAGGCCGAGAAGGAGCTGA	A	G	0.0773501	0.00505649	0.92265	0.00505649	0.00370096	0.00159974	0.147298	0.00159974	0.849001	0.00159974	1351	2	0.132548	0.147298	0.142734	1.3814	0.239862	0.3336	5	199	1147	0.37784	1	227156429	192		35	183	mrna-utr	A/G	0.238343	0.249728	YES	2	2	2	1	reference
AGT_rs5050	AGT	http://www.ncbi.nlm.nih.gov/entrez/query.fcgi?db=gene&cmd=Retrieve&dopt=full_report&list_uids=183	rs5050		http://www.ncbi.nlm.nih.gov/SNP/snp_ref.cgi?rs=5050	A	C	TGTCCTTCTGGCCAGCCTGTGGTCTGGCCAAGTGATGTAACCCTCCTCTCCAGCCTGTGCACAGGCAGCCTGGGAACAGCTCCATCCCCACCCCTCAGCTATAAATAGGGC[A/C]TCGTGACCCGGCCGGGGGAAGAAGCTGCCGTTGTTCTGGGTACTACAGCAGAAGGTAAGCCGGGGGCCCCCTCAGCTCCTTCTCGGCCTTGTCTCTCTCAGATGTAACTGAGCTGTGGGC	GCCCACAGCTCAGTTACATCTGAGAGAGACAAGGCCGAGAAGGAGCTGAGGGGGCCCCCGGCTTACCTTCTGCTGTAGTACCCAGAACAACGGCAGCTTCTTCCCCCGGCCGGGTCACGA[G/T]GCCCTATTTATAGCTGAGGGGTGGGGATGGAGCTGTTCCCAGGCTGCCTGTGCACAGGCTGGAGAGGAGGGTTACATCACTTGGCCAGACCACAGGCTGGCCAGAAGGACA	G	T	0.836029	0.00710747	0.163971	0.00710747	0.699265	0.00373145	0.273529	0.00373145	0.0272059	0.00373145	1360	2	0.236584	0.273529	0.274168	0.00738896	0.931499	0.9269	951	372	37	0.561151	1	227156621	-77256882		35	183	locus-region	G/T	0.208579	0.246545	YES	2	2	2	1	reference
AKR1B1_rs1790998	AKR1B1	http://www.ncbi.nlm.nih.gov/entrez/query.fcgi?db=gene&cmd=Retrieve&dopt=full_report&list_uids=231	rs1790998		http://www.ncbi.nlm.nih.gov/SNP/snp_ref.cgi?rs=1790998	A	C	AGTCAATCAATCCCCACCCCAAACACACTTTTTTTTTTCCTGCTTAAGATTAAAGTGGTTTTTCAGTTCTTGGGAACCAAAAGAGCACAGACTAGGATAATCAAGCTTGCGTTGGCACGA[A/C]ATGAAAAAAAAGTTGTGAGAGGTTTTTCTAGAAAAGTAAAAGACAGCAATGACTGCAAGAGGTCACGAAGAAGCTGCTGATCATTCCTTGGATATGTGCCATTCGCTGGAGACATGTGTG	CACACATGTCTCCAGCGAATGGCACATATCCAAGGAATGATCAGCAGCTTCTTCGTGACCTCTTGCAGTCATTGCTGTCTTTTACTTTTCTAGAAAAACCTCTCACAACTTTTTTTTCAT[G/T]TCGTGCCAACGCAAGCTTGATTATCCTAGTCTGTGCTCTTTTGGTTCCCAAGAACTGAAAAACCACTTTAATCTTAAGCAGGAAAAAAAAAAGTGTGTTTGGGGTGGGGATTGATTGACT	G	T	0.468062	0.00962523	0.531938	0.00962523	0.222467	0.00674659	0.491189	0.00674659	0.286344	0.00674659	1362	2	0.373978	0.491189	0.49796	0.251782	0.615823	0.6131	303	669	390	0.805625	7	133595635	-13324		35	231	intron	G/T	0.492188	0.0620098	YES	3	3	3	1	reference
AKR1B1_rs1791001	AKR1B1	http://www.ncbi.nlm.nih.gov/entrez/query.fcgi?db=gene&cmd=Retrieve&dopt=full_report&list_uids=231	rs1791001		http://www.ncbi.nlm.nih.gov/SNP/snp_ref.cgi?rs=1791001	C	G	CTGGGTTGAATCCAATACTGACTGTGCTTATCCCGGCTGGGCACCCTCCCAGGGTCCTGCCAATGAGCCCCGTGATAAGCCGTGACAGAGAGCAGCAAGGACATTGCACTACAGCAGTTT[C/G]TGCAATTTTATCAACATAAAGGACATAGTGTTGAGAAACCTTGTTCTTTGAAATCAGATCCTGAAAAATGATGCTGTTTGAAATCGTCTCCGGAGGCATTGTTCAGAGATTTTCCAATGC	GCATTGGAAAATCTCTGAACAATGCCTCCGGAGACGatttcaaacagcatcatttttcaggatctgatttcaaagaacaaggtttctcaACACTATGTCCTTTATGTTGATAAAATTGCA[C/G]AAACTGCTGTAGTGCAATGTCCTTGCTGCTCTCTGTCACGGCTTATCACGGGGCTCATTGGCAGGACCCTGGGAGGGTGCCCAGCCGGGATAAGCACAGTCAGTATTGGATTCAACCCAG	C	G	0.173642	0.00729366	0.826358	0.00729366	0.0315712	0.00394458	0.284141	0.00394458	0.684288	0.00394458	1362	2	0.245802	0.284141	0.286981	0.133344	0.71499	0.6999	43	387	932	0.921258	7	133582311	6899		35	231	.	C/G	0.290437	0.246708	YES	3	3	3	1	reference
AKR1B1_rs2259458	AKR1B1	http://www.ncbi.nlm.nih.gov/entrez/query.fcgi?db=gene&cmd=Retrieve&dopt=full_report&list_uids=231	rs2259458		http://www.ncbi.nlm.nih.gov/SNP/snp_ref.cgi?rs=2259458	A	C	CAGAACGCATTGCTGAGAACTTTAAGGTAAGATCTTGGCTGGTCAGGCCTGGCCCTCCTCCATGGAGTGGGGGATGGGGGAGGCCTCTCATCCTGTCTCTGGAGTGTCATCTGTGGGATC[A/C]CCACCATCCTCTCTTCTGAGGCCAGGGAGCTGTGGCGAGCAAGCCAAGACTGAGACTGACACCTCACCAGTGGAGCCGTGTGCAGGGGCAGGCCTTGGGCCTCCAGGGCCCCGTGCTGTG	CACAGCACGGGGCCCTGGAGGCCCAAGGCCTGCCCCTGCACACGGCTCCACTGGTGAGGTGTCAGTCTCAGTCTTGGCTTGCTCGCCACAGCTCCCTGGCCTCAGAAGAGAGGATGGTGG[G/T]GATCCCACAGATGACACTCCAGAGACAGGATGAGAGGCCTCCCCCATCCCCCACTCCATGGAGGAGGGCCAGGCCTGACCAGCCAAGATCTTACCTTAAAGTTCTCAGCAATGCGTTCTG	G	T	0.307636	0.00896525	0.692364	0.00896525	0.100587	0.00582492	0.414097	0.00582492	0.485316	0.00582492	1362	2	0.335257	0.414097	0.425992	1.06197	0.302766	0.3037	137	564	661	0.852728	7	133589210	3701		35	231	intron	G/T	0.426528	0.177025	YES	3	3	3	1	reference
AKR1B1_rs5059	AKR1B1	http://www.ncbi.nlm.nih.gov/entrez/query.fcgi?db=gene&cmd=Retrieve&dopt=full_report&list_uids=231	rs5059		http://www.ncbi.nlm.nih.gov/SNP/snp_ref.cgi?rs=5059	A	T	TTTCCAGCCAGGAAGCTGCCTTGTGGCTGGCAATGATGACATGTGCCCTCTCGCTGGCTT[A/T]GCTGTGGTGCACGTACCATGAGAAGGGCCTGGTGAAAGGAGCCTGCCAGAAGACACTCAG	TTTCCAGCCAGGAAGCTGCCTTGTGGCTGGCAATGATGACATGTGCCCTCTCGCTGGCTT[A/T]GCTGTGGTGCACGTACCATGAGAAGGGCCTGGTGAAAGGAGCCTGCCAGAAGACACTCAG	A	T	1	0			1	1.49167e-154					1362	1	0	0	0	0			1362	0	0	0.612506	7	133592911	10390		35	231	splice-site	A/T	0.0327778	0.123752	YES	3	3	3	1	reference
AKR1B1_rs706206	AKR1B1	http://www.ncbi.nlm.nih.gov/entrez/query.fcgi?db=gene&cmd=Retrieve&dopt=full_report&list_uids=231	rs706206		http://www.ncbi.nlm.nih.gov/SNP/snp_ref.cgi?rs=706206	A	G	ACACCTTATCTCTTGCTATTGTTGGATATTTACAGTTTTACTTTAAGTATACAGCATTTTAAAAATACATACGCATATGTGTATATCTGTGTGCAGGCCTGGGACTAAGGGAAGGCAAGT[A/G]CCAAGGACATAAATGTAAAAAAGCTCCTACCTTCTGGCATGAAAATATTGTACCTGTGTACCTCATTTGTCTTACCTTGGTCCCAGCCCAGCCCTATACCTAGTGTGTGTGTGTGTGTGT	acacacacacacacacacTAGGTATAGGGCTGGGCTGGGACCAAGGTAAGACAAATGAGGTACACAGGTACAATATTTTCATGCCAGAAGGTAGGAGCTTTTTTACATTTATGTCCTTGG[C/T]ACTTGCCTTCCCTTAGTCCCAGGCCTGCACACAGATATACACATATGCGTATGTATTTTTAAAATGCTGTATACTTAAAGTAAAACTGTAAATATCCAACAATAGCAAGAGATAAGGTGT	C	T	0.0337739	0.00355518	0.966226	0.00355518	0.00293686	0.00138786	0.061674	0.00138786	0.935389	0.00138786	1362	2	0.0631365	0.061674	0.0652664	4.12629	0.0422218	0.0624	4	84	1274	0.9681	7	133603301			35	231	locus-region	C/T	0.0512465	0.151648	YES	3	3	3	1	reference
APOA1_rs17243046	APOA1	http://www.ncbi.nlm.nih.gov/entrez/query.fcgi?db=gene&cmd=Retrieve&dopt=full_report&list_uids=335	rs17243046	rs7123454	http://www.ncbi.nlm.nih.gov/SNP/snp_ref.cgi?rs7123454	A	C	ACTGTGTGTGTTTACTCAAAACTGTGGAGCTGACCTCCCCTATCCAGGCC[A/C]CCTAGCCCTCTTAGGCGCACGTGAAGGGAGGAGGCCGGATGGGCTAGAGG	ACTGTGTGTGTTTACTCAAAACTGTGGAGCTGACCTCCCCTATCCAGGCC[A/C]CCTAGCCCTCTTAGGCGCACGTGAAGGGAGGAGGCCGGATGGGCTAGAGG	A	C	0.878766	0.00629904	0.121234	0.00629904	0.773696	0.00299272	0.21014	0.00299272	0.0161646	0.00299272	1361	2	0.190373	0.21014	0.213073	0.257993	0.611503	0.6138	1053	286	22	0.686418	11	116209388	1412	17	35.1	335	locus	A/C	0.152778	0.230321	YES
APOA1_rs17243074	APOA1	http://www.ncbi.nlm.nih.gov/entrez/query.fcgi?db=gene&cmd=Retrieve&dopt=full_report&list_uids=335	rs17243074	rs12721028	http://www.ncbi.nlm.nih.gov/SNP/snp_ref.cgi?rs12721028	A	G	GGCCAGGGGTGCAGGGTCTAAAAAGCGCTGCCTAGCCCATCCTGCTGTTC[A/G]CTGGGCAAGCGACGTCACAGGTCCAGGCTTCAGTGTCCTCATCCATGCTC	GGCCAGGGGTGCAGGGTCTAAAAAGCGCTGCCTAGCCCATCCTGCTGTTC[A/G]CTGGGCAAGCGACGTCACAGGTCCAGGCTTCAGTGTCCTCATCCATGCTC	A	G	0.836637	0.00722751	0.163363	0.00722751	0.70558	0.00394485	0.262115	0.00394485	0.0323054	0.00394485	1362	2	0.23599	0.262115	0.273351	2.30128	0.129267	0.1362	961	357	44	0.859418	22			17	35.1	335	.	A/G	0.405482	0.195769	YES
APOA4_rs17244645	APOA4	http://www.ncbi.nlm.nih.gov/entrez/query.fcgi?db=gene&cmd=Retrieve&dopt=full_report&list_uids=337	rs17244645	rs5092	http://www.ncbi.nlm.nih.gov/SNP/snp_ref.cgi?rs5092	A	G	TGTTACCACCCAGGAGCCAGGGCTGAGGTCAGTGCTGACCAGGTGGCCAC[A/G]GTGATGTGGGACTACTTCAGCCAGCTGAGCAACAATGCCAAGGAGGCCGT	ACGGCCTCCTTGGCATTGTTGCTCAGCTGGCTGAAGTAGTCCCACATCAC[C/T]GTGGCCACCTGGTCAGCACTGACCTCAGCCCTGGCTCCTGGGTGGTAACA	C	T	0.839574	0.00714481	0.160426	0.00714481	0.709251	0.00384503	0.260646	0.00384503	0.0301028	0.00384503	1362	2	0.233096	0.260646	0.269379	1.43135	0.231545	0.2284	966	355	41	0.92948	11	116198674	-1789	17	35.1	337	synonymous	C/T	0.277778	0.248452	YES
APOA4_rs17250988	APOA4	http://www.ncbi.nlm.nih.gov/entrez/query.fcgi?db=gene&cmd=Retrieve&dopt=full_report&list_uids=337	rs17250988	rs675	http://www.ncbi.nlm.nih.gov/SNP/snp_ref.cgi?rs675	A	T	AGGTCAACTCCTTCTTCAGCACCTTCAAGGAGAAAGAGAGCCAGGACAAG[A/T]CTCTCTCCCTCCCTGAGCTGGAGCAACAGCAGGAACAGCAGCAGGAGCAG	CTGCTCCTGCTGCTGTTCCTGCTGTTGCTCCAGCTCAGGGAGGGAGAGAG[A/T]CTTGTCCTGGCTCTCTTTCTCCTTGAAGGTGCTGAAGAAGGAGTTGACCT	A	T	0.80837	0.00739644	0.19163	0.00739644	0.647577	0.00399369	0.321586	0.00399369	0.030837	0.00399369	1362	2	0.261823	0.321586	0.309816	1.96575	0.1609	0.1942	882	438	42	0.836916	11	116196885	1420	17	35.1	337	nonsynonymous	A/T	0.201446	0.24524	YES
APOA4_rs17251002	APOA4	http://www.ncbi.nlm.nih.gov/entrez/query.fcgi?db=gene&cmd=Retrieve&dopt=full_report&list_uids=337	rs17251002	rs5096	http://www.ncbi.nlm.nih.gov/SNP/snp_ref.cgi?rs5096	A	G	TTGATTCCACTGGGGCCTGTCTTTCTGAAACGTATTAGAAATCAGCTCAC[A/G]TGACATTTTCCTCCCTCCCTCTCTTCCATGAGCCTGAATGATAGGATGTG	TTGATTCCACTGGGGCCTGTCTTTCTGAAACGTATTAGAAATCAGCTCAC[A/G]TGACATTTTCCTCCCTCCCTCTCTTCCATGAGCCTGAATGATAGGATGTG	A	G	0.645742	0.00916505	0.354258	0.00916505	0.417034	0.00619881	0.457416	0.00619881	0.125551	0.00619881	1362	2	0.352857	0.457416	0.457519	6.93407e-05	0.993356	1	568	623	171	0.928691	11	116198305	-29054	17	35.1	337	intron	A/G	0.429688	0.173817	YES
APOA5_rs10750097	APOA5	http://www.ncbi.nlm.nih.gov/entrez/query.fcgi?db=gene&cmd=Retrieve&dopt=full_report&list_uids=116519	rs10750097		http://www.ncbi.nlm.nih.gov/SNP/snp_ref.cgi?rs=10750097	A	G	CTTGATTGCATTCATAGCCTCCAACAGGTCTTTCTACCACACTCCTGCCCATTTAATTCATCCTCCACTGTGGCTCATCCTGACTCATTTCCAGTCTCATCTGCTGCCACATAAAACCAC[A/G]GCATTCCCTGAGCCTTTATACAGGCTTCCCTCTGCTTGAAATAGCCTATCCCCTGGTGAATATATATTCATTTTTTAGAGTTAGTTTGTATTAGTTAGAATTAGACTTGGCTGCAAGGGA	CTTGATTGCATTCATAGCCTCCAACAGGTCTTTCTACCACACTCCTGCCCATTTAATTCATCCTCCACTGTGGCTCATCCTGACTCATTTCCAGTCTCATCTGCTGCCACATAAAACCAC[G/A]GCATTCCCTGAGCCTTTATACAGGCTTCCCTCTGCTTGAAATAGCCTATCCCCTGGTGAATATATATTCATTTTTTAGAGTTAGTTTGTATTAGTTAGAATTAGACTTGGCTGCAAGGGA	G	A	0.799192	0.00769452	0.200808	0.00769452	0.639501	0.00437237	0.319383	0.00437237	0.041116	0.00437237	1362	2	0.269458	0.319383	0.320968	0.0331965	0.855426	0.8678	871	435	56	0.950567	11	116169250	-1709	17	35	116519	locus-region	A/G	0.421172	0.182209	YES	2	2	2	1	reference
APOA5_rs12287066	APOA5	http://www.ncbi.nlm.nih.gov/entrez/query.fcgi?db=gene&cmd=Retrieve&dopt=full_report&list_uids=116519	rs12287066		http://www.ncbi.nlm.nih.gov/SNP/snp_ref.cgi?rs=12287066	A	C	GAGAGCCCAGGCCCTGATTACCTAGTCCCTCTCCACAGCGTTTTCGGCCACCCAGGCACGGAAAGGCTTCTGGGACTACTTCAGCCAGACCAGCGGGGACAAAGGCAGGGTGGAGCAGAT[A/C]CATCAGCAGAAGATGGCTCGCGAGCCCGCGTGAGTGCCCAGGGGAAGGGGTGTAGGCGAAGGGAGGAGACAGCTGGGCCATGCCATGATGACCTGCCTCTGCTGCCTCAACCTCTGTGGC	GCCACAGAGGTTGAGGCAGCAGAGGCAGGTCATCATGGCATGGCCCAGCTGTCTCCTCCCTTCGCCTACACCCCTTCCCCTGGGCACTCACGCGGGCTCGCGAGCCATCTTCTGCTGATG[G/T]ATCTGCTCCACCCTGCCTTTGTCCCCGCTGGTCTGGCTGAAGTAGTCCCAGAAGCCTTTCCGTGCCTGGGTGGCCGAAAACGCTGTGGAGAGGGACTAGGTAATCAGGGCCTGGGCTCTC	G	T	0.0624082	0.0046549	0.937592	0.0046549	0.00440529	0.00167353	0.116006	0.00167353	0.879589	0.00167353	1362	2	0.110179	0.116006	0.117027	0.103671	0.747468	0.6478	6	158	1198	0.701873	11	116167541	1344	17	35	116519	coding-synon	G/T			NO	2	2	2	1	reference
APOA5_rs1729411	APOA5	http://www.ncbi.nlm.nih.gov/entrez/query.fcgi?db=gene&cmd=Retrieve&dopt=full_report&list_uids=116519	rs1729411		http://www.ncbi.nlm.nih.gov/SNP/snp_ref.cgi?rs=1729411	A	G	TCCTCAGCCAGCATTCATAGGGTTAAAGACCAACCACATCCCTCTTTATGAAACAATCCTGGAACAAGCAAGGGAAGCCAGGCAGGGTGAAGATGAGATGGCAAGAGGCATCTGGGCCAG[A/G]GACTCTGAGCCCCAGGAACTGGAGCGAAAGTAAGATTTGCCCCATGAGGAAAAGCTGAACTCCACTCGCAGGGCCTCTGAGGAGAGCAAGCCCAAATGCTCAGATCTTCTCTGATGACAC	GTGTCATCAGAGAAGATCTGAGCATTTGGGCTTGCTCTCCTCAGAGGCCCTGCGAGTGGAGTTCAGCTTTTCCTCATGGGGCAAATCTTACTTTCGCTCCAGTTCCTGGGGCTCAGAGTC[T/C]CTGGCCCAGATGCCTCTTGCCATCTCATCTTCACCCTGCCTGGCTTCCCTTGCTTGTTCCAGGATTGTTTCATAAAGAGGGATGTGGTTGGTCTTTAACCCTATGAATGCTGGCTGAGGA	T	C	0.127753	0.00653702	0.872247	0.00653702	0.0212922	0.00333494	0.212922	0.00333494	0.765786	0.00333494	1362	2	0.19803	0.212922	0.222865	2.71079	0.0996716	0.114	29	290	1043	0.740726	11	116168885	-2862	17	35	116519	locus-region	C/T			NO	2	2	2	1	reference
APOA5_rs619054	APOA5	http://www.ncbi.nlm.nih.gov/entrez/query.fcgi?db=gene&cmd=Retrieve&dopt=full_report&list_uids=116519	rs619054		http://www.ncbi.nlm.nih.gov/SNP/snp_ref.cgi?rs=619054	A	G	AGACAGCAGCCCCTTTGGTGGCCTCCCTGTCCTGCACAGGACCTTCCACCCTCCACCCAACAGGCCACTTTCAAGGACTGAACCATGCTAGAGGCTCAGAGCCAAGGCTCCCCAGACAAG[A/G]AGCTGGGAATGGGCCTGGGCAGGTAGATCCTCAGGGGTCCCCCAGATGGCTGTGGCCCTGGTCATGAAGGCTGTGAGTGATGTCTTCCCACAGGTCATCCAGACGGGCCTGCAGCTTGCT	AGCAAGCTGCAGGCCCGTCTGGATGACCTGTGGGAAGACATCACTCACAGCCTTCATGACCAGGGCCACAGCCATCTGGGGGACCCCTGAGGATCTACCTGCCCAGGCCCATTCCCAGCT[C/T]CTTGTCTGGGGAGCCTTGGCTCTGAGCCTCTAGCATGGTTCAGTCCTTGAAAGTGGCCTGTTGGGTGGAGGGTGGAAGGTCCTGTGCAGGACAGGGAGGCCACCAAAGGGGCTGCTGTCT	C	T	0.242658	0.00843713	0.757342	0.00843713	0.0690162	0.00516646	0.347283	0.00516646	0.5837	0.00516646	1362	2	0.300004	0.347283	0.36755	4.14102	0.0418559	0.0483	94	473	795	0.82625	11	116166023	38575	17	35	116519	mrna-utr	C/T	0.357778	0.225575	YES	2	2	2	1	reference
APOB_rs17240476	APOB	http://www.ncbi.nlm.nih.gov/entrez/query.fcgi?db=gene&cmd=Retrieve&dopt=full_report&list_uids=338	rs17240476	rs661665	http://www.ncbi.nlm.nih.gov/SNP/snp_ref.cgi?rs661665	A	C	TTGATCAGATTACAACAGTTCTGGGATGTTCTGCGTTTGCTCAGTACACA[A/C]CCTCCGGGAAGGTCGCGTGTTGGGCGCCCGCTGGAACAGGGCTGGGGGAA	TTCCCCCAGCCCTGTTCCAGCGGGCGCCCAACACGCGACCTTCCCGGAGG[G/T]TGTGTACTGAGCAAACGCAGAACATCCCAGAACTGTTGTAATCTGATCAA	G	T	0.5	0.00935943	0.5	0.00935943	0.23862	0.00676708	0.522761	0.00676708	0.23862	0.00676708	1362	2	0.375	0.522761	0.5	2.82232	0.0929619	0.1069	325	712	325	0.517799	2	21118646	-10150		35.1	338	intron	G/T	0.412385	0.190082	YES					reference
APOB_rs17240611	APOB	http://www.ncbi.nlm.nih.gov/entrez/query.fcgi?db=gene&cmd=Retrieve&dopt=full_report&list_uids=338	rs17240611	rs12720804	http://www.ncbi.nlm.nih.gov/SNP/snp_ref.cgi?rs12720804	A	G	TGAATTTTTAAAAATATTTTCTCTACATTATATTATAAAAGTTTTTGAAC[A/G]TAGCAAAGTTGACAGAATTTCACAGGGAAAACCCCTAGAAAACCAGCTAT	TGAATTTTTAAAAATATTTTCTCTACATTATATTATAAAAGTTTTTGAAC[A/G]TAGCAAAGTTGACAGAATTTCACAGGGAAAACCCCTAGAAAACCAGCTAT	A	G	0.993392	0.00154718	0.00660793	0.00154718	0.986784	2.04473e-05	0.0132159	2.04473e-05			1362	2	0.0130424	0.0132159	0.0131285	0.0602652	0.806077	1	1344	18	0	0.884931	2	21108502	-3957		35.1	338	intron	A/G	0.21875	0.248039	YES					reference
APOB_rs17240674	APOB	http://www.ncbi.nlm.nih.gov/entrez/query.fcgi?db=gene&cmd=Retrieve&dopt=full_report&list_uids=338	rs17240674	rs570877	http://www.ncbi.nlm.nih.gov/SNP/snp_ref.cgi?rs570877	A	C	GTGCAAATGTGTAGCAGATCTAGACCCAAAGACTTAGGGTCAATGAAATC[A/C]AGACATTTTGGTAGTGATTGGAAATCCATATTTACTTGGGGTGCAAGAGT	GTGCAAATGTGTAGCAGATCTAGACCCAAAGACTTAGGGTCAATGAAATC[A/C]AGACATTTTGGTAGTGATTGGAAATCCATATTTACTTGGGGTGCAAGAGT	A	C	0.0947137	0.00567686	0.905286	0.00567686	0.0110132	0.00252589	0.167401	0.00252589	0.821586	0.00252589	1362	2	0.156782	0.167401	0.171486	0.772895	0.379323	0.3422	15	228	1119	0.928922	2	21104545	-12902		35.1	338	intron	A/C	0.242675	0.249893	YES					reference
APOB_rs17240854	APOB	http://www.ncbi.nlm.nih.gov/entrez/query.fcgi?db=gene&cmd=Retrieve&dopt=full_report&list_uids=338	rs17240854	rs12720770	http://www.ncbi.nlm.nih.gov/SNP/snp_ref.cgi?rs12720770	A	G	GAGACCTGTGGTTACAGGCTGAACTAGTACCATTCACAACTATTTCCTAC[A/G]TATTTTCAGATGAAGAGAAGATTGAATTTGAATGGAACACAGGCACCAAT	GAGACCTGTGGTTACAGGCTGAACTAGTACCATTCACAACTATTTCCTAC[A/G]TATTTTCAGATGAAGAGAAGATTGAATTTGAATGGAACACAGGCACCAAT	A	G			1	0					1	1.49167e-154	1362	1	0	0	0	0			0	0	1362	0.892749	2	21091647	-7407		35.1	338	intron	A/G	0.152778	0.230321	YES					reference
APOB_rs17240910	APOB	http://www.ncbi.nlm.nih.gov/entrez/query.fcgi?db=gene&cmd=Retrieve&dopt=full_report&list_uids=338	rs17240910	rs12713600	http://www.ncbi.nlm.nih.gov/SNP/snp_ref.cgi?rs12713600	A	G	AGTAAACTCTGCCTTCCCTTCTCCAAACAGTGCCATGCCTTTAGCAGTTA[A/G]AACACTGTGGCCCACATGCTGGGAATCGACTTGTGATTGAATTTCAAGTT	AACTTGAAATTCAATCACAAGTCGATTCCCAGCATGTGGGCCACAGTGTT[C/T]TAACTGCTAAAGGCATGGCACTGTTTGGAGAAGGGAAGGCAGAGTTTACT	C	T	0.000367107	0.000366972	0.999633	0.000366972			0.000734214	2.69436e-07	0.999266	2.69436e-07	1362	2	0.000733676	0.000734214	0.000733945	0.000183688	0.989186	1	0	1	1361	0.961016	2	21084241	196092		35.1	338	intron	C/T	0.186632	0.241836	YES					reference
APOB_rs17240958	APOB	http://www.ncbi.nlm.nih.gov/entrez/query.fcgi?db=gene&cmd=Retrieve&dopt=full_report&list_uids=338	rs17240958	rs1042034	http://www.ncbi.nlm.nih.gov/SNP/snp_ref.cgi?rs1042034	A	G	ATTTACTTATCTTATTAATTATATCCAAGATGAGATCAACACAATCTTCA[A/G]TGATTATATCCCATATGTTTTTAAATTGTTGAAAGAAAACCTATGCCTTA	ATTTACTTATCTTATTAATTATATCCAAGATGAGATCAACACAATCTTCA[A/G]TGATTATATCCCATATGTTTTTAAATTGTTGAAAGAAAACCTATGCCTTA	A	G	0.785609	0.00764422	0.214391	0.00764422	0.60793	0.0043068	0.35536	0.0043068	0.0367107	0.0043068	1362	2	0.280119	0.35536	0.336855	4.11037	0.0426211	0.0429	828	484	50	0.940194	2	21078786			35.1	338	nonsynonymous	A/G	0.311725	0.24226	YES					reference
APOB_rs17246786	APOB	http://www.ncbi.nlm.nih.gov/entrez/query.fcgi?db=gene&cmd=Retrieve&dopt=full_report&list_uids=338	rs17246786	rs934197	http://www.ncbi.nlm.nih.gov/SNP/snp_ref.cgi?rs934197	A	G	TAATCCTGATCAGAATCTGTGGCTGCGGGGTTCAGCCCGTGCTGGGGGAG[A/G]AGAGAGAAGGGGGATGCAGGGAGGTCTGGTGAGTGACCAGTCACTGCCCC	GGGGCAGTGACTGGTCACTCACCAGACCTCCCTGCATCCCCCTTCTCTCT[C/T]CTCCCCCAGCACGGGCTGAACCCCGCAGCCACAGATTCTGATCAGGATTA	C	T	0.316079	0.00886175	0.683921	0.00886175	0.0976505	0.00583803	0.436858	0.00583803	0.465492	0.00583803	1362	2	0.338885	0.436858	0.432346	0.148286	0.700179	0.7515	133	595	634	0.829245	2	21120966	-251		35.1	338	locus	C/T	0.35124	0.228584	YES					reference
APOB_rs17246793	APOB	http://www.ncbi.nlm.nih.gov/entrez/query.fcgi?db=gene&cmd=Retrieve&dopt=full_report&list_uids=338	rs17246793	rs1800481	http://www.ncbi.nlm.nih.gov/SNP/snp_ref.cgi?rs1800481	A	G	TCTTCAGTGCTCTGGCGCGGCCCTTCCTGTGTCTCAGTGGGGCCATGGCC[A/G]GCGCCTCAGGGTCTGAGAAGCCTGCCCTGACCAGGGGTGCCTTCTTCAGA	TCTGAAGAAGGCACCCCTGGTCAGGGCAGGCTTCTCAGACCCTGAGGCGC[C/T]GGCCATGGCCCCACTGAGACACAGGAAGGGCCGCGCCAGAGCACTGAAGA	C	T	0.157856	0.00683099	0.842144	0.00683099	0.0190896	0.00330853	0.277533	0.00330853	0.703377	0.00330853	1362	2	0.23053	0.277533	0.265875	2.61858	0.105619	0.1281	26	378	958	0.881495	2	21120715	-1188		35.1	338	locus	C/T	0.375	0.216506	YES					reference
APOB_rs17246814	APOB	http://www.ncbi.nlm.nih.gov/entrez/query.fcgi?db=gene&cmd=Retrieve&dopt=full_report&list_uids=338	rs17246814	rs12720799	http://www.ncbi.nlm.nih.gov/SNP/snp_ref.cgi?rs12720799	A	G	AACTCTCTTCTACCTGGCCTTCTGTTCTGTCCCAAAAGTTCAGCCTGGGG[A/G]CGGGGGAGGGAAGGGATTGTCTCTCCGCTGGCCTGTGCACACTTTGAAGA	AACTCTCTTCTACCTGGCCTTCTGTTCTGTCCCAAAAGTTCAGCCTGGGG[A/G]CGGGGGAGGGAAGGGATTGTCTCTCCGCTGGCCTGTGCACACTTTGAAGA	A	G	0.00110213	0.000635614	0.998898	0.000635614			0.00220426	1.40106e-06	0.997796	1.40106e-06	1361	2	0.00219941	0.00220426	0.00220183	0.00165685	0.967532	1	0	3	1358	0.648533	2	21119669	-6553		35.1	338	untranslated	A/G	0.127066	0.217686	YES					reference
APOB_rs17246926	APOB	http://www.ncbi.nlm.nih.gov/entrez/query.fcgi?db=gene&cmd=Retrieve&dopt=full_report&list_uids=338	rs17246926	rs520354	http://www.ncbi.nlm.nih.gov/SNP/snp_ref.cgi?rs520354	A	G	TCTTCAAAGGCCAGAGGCTTGGAGCTGGCACAAGGAGTCCTTGTGCAGAA[A/G]AGAACAGAAGGTGGTTTTGCTGCCCTACATCCATCCCCGGAACCTTCTCA	TGAGAAGGTTCCGGGGATGGATGTAGGGCAGCAAAACCACCTTCTGTTCT[C/T]TTCTGCACAAGGACTCCTTGTGCCAGCTCCAAGCCTCTGGCCTTTGAAGA	C	T	0.528634	0.00959782	0.471366	0.00959782	0.281204	0.00675203	0.49486	0.00675203	0.223935	0.00675203	1362	2	0.374179	0.49486	0.49836	0.0671644	0.795511	0.7838	383	674	305	0.922998	2	21113117	-50		35.1	338	intron	C/T	0.405482	0.195769	YES					reference
APOB_rs17246933	APOB	http://www.ncbi.nlm.nih.gov/entrez/query.fcgi?db=gene&cmd=Retrieve&dopt=full_report&list_uids=338	rs17246933	rs1469513	http://www.ncbi.nlm.nih.gov/SNP/snp_ref.cgi?rs1469513	A	G	TTTCTGCACAAGGACTCCTTGTGCCAGCTCCAAGCCTCTGGCCTTTGAAG[A/G]AGTCCCAAGACCTGTGTTCTCCCCCTCTCCCTCATCCCATGAAGTGGAGT	TTTCTGCACAAGGACTCCTTGTGCCAGCTCCAAGCCTCTGGCCTTTGAAG[A/G]AGTCCCAAGACCTGTGTTCTCCCCCTCTCCCTCATCCCATGAAGTGGAGT	A	G	0.575991	0.00948487	0.424009	0.00948487	0.332599	0.00661865	0.486784	0.00661865	0.180617	0.00661865	1362	2	0.369159	0.486784	0.488451	0.015855	0.899798	0.913	453	663	246	0.912657	2	21113067	-13261		35.1	338	intron	A/G	0.439508	0.163054	YES					reference
APOB_rs17247072	APOB	http://www.ncbi.nlm.nih.gov/entrez/query.fcgi?db=gene&cmd=Retrieve&dopt=full_report&list_uids=338	rs17247072	rs12714102	http://www.ncbi.nlm.nih.gov/SNP/snp_ref.cgi?rs12714102	C	G	TCATAAAAAAATAATGAGGTGATTACAATGATGAAGCATTTTGTCTTGAA[C/G]TGGAAACACATTTTTAAATATGTTTTAACAAGAAATGCACCCTGGAAGAA	TTCTTCCAGGGTGCATTTCTTGTTAAAACATATTTAAAAATGTGTTTCCA[C/G]TTCAAGACAAAATGCTTCATCATTGTAATCACCTCATTATTTTTTTATGA	C	G	0.0976505	0.00578179	0.902349	0.00578179	0.0124816	0.00266362	0.170338	0.00266362	0.817181	0.00266362	1362	2	0.160701	0.170338	0.17623	1.52248	0.217245	0.2144	17	232	1113	0.929709	2	21099811	-20060		35.1	338	intron	C/G	0.369118	0.219797	YES					reference
APOB_rs17247305	APOB	http://www.ncbi.nlm.nih.gov/entrez/query.fcgi?db=gene&cmd=Retrieve&dopt=full_report&list_uids=338	rs17247305	rs12691188	http://www.ncbi.nlm.nih.gov/SNP/snp_ref.cgi?rs12691188	A	G	GAGGACTAAACAGAGAGAAAAAAAAAAATAACATGTTTTCAATTACTCCA[A/G]TTACACAATATAGTACACTAAAACTTCATTAGCAGTTAAAAATAAAGATC	GATCTTTATTTTTAACTGCTAATGAAGTTTTAGTGTACTATATTGTGTAA[C/T]TGGAGTAATTGAAAACATGTTATTTTTTTTTTTCTCTCTGTTTAGTCCTC	C	T	0.982746	0.00247295	0.017254	0.00247295	0.965492	8.53369e-05	0.0345081	8.53369e-05			1362	2	0.0333376	0.0345081	0.0339127	0.419833	0.517021	1	1315	47	0	0.907237	2	21079757	95689165		35.1	338	intron	C/T	0.186632	0.241836	YES					reference
APOC1_rs10408994	APOC1	http://www.ncbi.nlm.nih.gov/entrez/query.fcgi?db=gene&cmd=Retrieve&dopt=full_report&list_uids=341	rs10408994		http://www.ncbi.nlm.nih.gov/SNP/snp_ref.cgi?rs=10408994	A	G	TGCCCCTCCGGCCTCGCCATGAGGCTCTTCCTGTCGCTCCCGGTCCTGGTGGTGGTTCTGTCGATCGTCTTGGAAGGTAAAAGTGGGATGGGAGAATTGCGGAGTTGGAGATTTGGAAGA[A/G]TGAAGGTGGCTACAGGCCTGGGGTCCCGGCTTAGAGGACCTCTGAGAGCTCCGGGGCCCCTTCTGGGTCGTGGTTGCCTCATCGTGGTCGGGTGGGTCTCCAGGTTCTCCCAGGCTCAGT	TGCCCCTCCGGCCTCGCCATGAGGCTCTTCCTGTCGCTCCCGGTCCTGGTGGTGGTTCTGTCGATCGTCTTGGAAGGTAAAAGTGGGATGGGAGAATTGCGGAGTTGGAGATTTGGAAGA[G/A]TGAAGGTGGCTACAGGCCTGGGGTCCCGGCTTAGAGGACCTCTGAGAGCTCCGGGGCCCCTTCTGGGTCGTGGTTGCCTCATCGTGGTCGGGTGGGTCTCCAGGTTCTCCCAGGCTCAGT	G	A	0.000367107	0.000366972	0.999633	0.000366972			0.000734214	2.69436e-07	0.999266	2.69436e-07	1362	2	0.000733676	0.000734214	0.000733945	0.000183688	0.989186	1	0	1	1361	0.724049	19	50110091	2242	3	35	341	intron	A/G	0.104938	0.20361	YES	2	2	2	1	reference
APOC1_rs10424339	APOC1	http://www.ncbi.nlm.nih.gov/entrez/query.fcgi?db=gene&cmd=Retrieve&dopt=full_report&list_uids=341	rs10424339		http://www.ncbi.nlm.nih.gov/SNP/snp_ref.cgi?rs=10424339	A	G	ATAAACTGGTGGTTCTACAGGGAAGTAAAGGAGCAGGCCTACAGGGTGTCTGGTACATGTAGATGCTCAGTATATCATGAAACCCACCCTTGCCCCCTTTGGCAAGTTAGAGAGTCATTC[A/G]TTCTTTCAAAAATATTTACTGAGCATCTGCTAAGTGCTGGAAACTGTTTCAATGTGGGGAATAAAACAGTGAAGAACGTGCCGAGCACGGTGGCTCACACCTGTAACCCCACCACTTTGG	ataaactgGTGGTTCTACAGGGAAGTAAAGGAGCAGGCCTACAGGGTGTCTGGTACATGTAGATGCTCAGTATATCATGAAACCCACCCTTGCCCCCTTTGGCAAGTTAGAGAGTCATTC[G/A]TTCTTTCAAAAATATTTACTGAGCATCTGCTAAGTGCTGGAAACTGTTTCAATGTGGGGAATAAAACAGTGAAGAACGTgccgagcacggtggctcacacctgtaaccccaccactttgg	G	A	0.000734214	0.000518787	0.999266	0.000518787			0.00146843	7.61801e-07	0.998532	7.61801e-07	1362	2	0.00146627	0.00146843	0.00146735	0.000735294	0.978367	1	0	2	1360	0.905369	19	50112333	2068	3	35	341	intron	A/G			YES	2	2	2	1	reference
APOC1_rs1064725	APOC1	http://www.ncbi.nlm.nih.gov/entrez/query.fcgi?db=gene&cmd=Retrieve&dopt=full_report&list_uids=341	rs1064725		http://www.ncbi.nlm.nih.gov/SNP/snp_ref.cgi?rs=1064725	A	C	TGGAAGCCCCTACCCTCTCCCGCAGCCCCTTCCCCAGAGTAAAGAAGCACTCAGGAGAGAATTTTCTGTAGGATTTTTATTGGTGGCACCTGGGGCCACATGG[A/C]GGGAGTCCTCAGCACAGGCGCTGGGGTGTGGGAAATTTCAGAGGCCCCTCCTGGGATGTCACCCTTCAGGTCCTCATGAGTCAATCTTGAGTTTCTCCTTCACTTTCTGAAATGTCTCTG	CAGAGACATTTCAGAAAGTGAAGGAGAAACTCAAGATTGACTCATGAGGACCTGAAGGGTGACATCCCAGGAGGGGCCTCTGAAATTTCCCACACCCCAGCGCCTGTGCTGAGGACTCCC[T/G]CCATGTGGCCCCAGGTGCCACCAATAAAAATCCTACAGAAAATTCTCTCCTGAGTGCTTCTTTACTCTGGGGAAGGGGCTGCGGGAGAGGGTAGGGGCTTCCA	T	G	0.948605	0.00424337	0.051395	0.00424337	0.900147	0.00138553	0.0969163	0.00138553	0.00293686	0.00138553	1362	2	0.0927533	0.0969163	0.0975071	0.0500054	0.823054	0.7769	1226	132	4	0.93921	19	50114401	25475	3	35	341	mrna-utr	G/T	0.0670332	0.170362	YES	2	2	2	1	reference
APOC2_rs1132899	APOC2	http://www.ncbi.nlm.nih.gov/entrez/query.fcgi?db=gene&cmd=Retrieve&dopt=full_report&list_uids=344	rs1132899		http://www.ncbi.nlm.nih.gov/SNP/snp_ref.cgi?rs=1132899	A	G	CACCCTCACCAGAACCATTGCCACCCGTCTCTGGTCCTGTTCACCACTGTCTCCAGCAGCTCCTTCATCCTGCCCCTCACCAGGCTCCAGCGACTCATCTTTAGCTTTGGTGGGGGGCTC[A/G]GGGTTCCTTCCTGGGCCTCTGGCTGGCATGCTAGGTGGAACCAGAGGGCAACTTGGGTAGGCTGGGACCCTAGAATCCCCTTCTCCCTTTCCCTCCATGCTCATCCTGTGTCGCTCCCGG	CCGGGAGCGACACAGGATGAGCATGGAGGGAAAGGGAGAAGGGGATTCTAGGGTCCCAGCCTACCCAAGTTGCCCTCTGGTTCCACCTAGCATGCCAGCCAGAGGCCCAGGAAGGAACCC[T/C]GAGCCCCCCACCAAAGCTAAAGATGAGTCGCTGGAGCCTGGTGAGGGGCAGGATGAAGGAGCTGCTGGAGACAGTGGTGAACAGGACCAGAGACGGGTGGCAATGGTTCTGGtgagggtg	T	C	0.52094	0.00971024	0.47906	0.00971024	0.278472	0.00676264	0.484938	0.00676264	0.236591	0.00676264	1361	2	0.374561	0.484938	0.499123	1.09933	0.294413	0.2932	379	660	322	0.891862	19	50139876	3619	3	35	344	locus-region	C/T	0.473663	0.111691	YES	2	2	2	1	reference
APOC2_rs17257657	APOC2	http://www.ncbi.nlm.nih.gov/entrez/query.fcgi?db=gene&cmd=Retrieve&dopt=full_report&list_uids=344	rs17257657	rs10422603	http://www.ncbi.nlm.nih.gov/SNP/snp_ref.cgi?rs10422603	A	C	GTGTCATGTGGCAGGCTGACTGGAGGCGGCTGTTCCTGTGGTCACGCCCC[A/C]CTCTGGTGGGGGGGACTGAGATCCTGCTCTGTGTGTGCTCGGTGTCCCAG	CTGGGACACCGAGCACACACAGAGCAGGATCTCAGTCCCCCCCACCAGAG[G/T]GGGGCGTGACCACAGGAACAGCCGCCTCCAGTCAGCCTGCCACATGACAC	G	T	0.831865	0.00717493	0.168135	0.00717493	0.692364	0.00380538	0.279001	0.00380538	0.0286344	0.00380538	1362	2	0.240607	0.279001	0.279731	0.00927307	0.923285	0.92	943	380	39	0.832856	19	50143496		3	35.1	344	untranslated	G/T	0.416322	0.186646	YES					reference
APOC2_rs5167	APOC2	http://www.ncbi.nlm.nih.gov/entrez/query.fcgi?db=gene&cmd=Retrieve&dopt=full_report&list_uids=344	rs5167		http://www.ncbi.nlm.nih.gov/SNP/snp_ref.cgi?rs=5167	A	C	CACACCTGGCTTTTATGAACATTTTAACCCTGGTCCTTGTCCCCACAGACAAGCCTGGGGCACAGGCTGTGGGTCTTCTTCAAGAGGCTGTCTTTGGATTCGAGGAACCAGGCCTTGGTG[A/C]GCGGACCCAGGTCCCTCAGGTGGTCGTCATAGTAGGTCTGCATGAAGCCCCGGAAGGTGCTCGGGCTCCTACAGGAGAGAGGACATCACAGTGGAGGCCCCAGCTCTCCCCAGGTGTTCT	AGAACACCTGGGGAGAGCTGGGGCCTCCACTGTGATGTCCTCTCTCCTGTAGGAGCCCGAGCACCTTCCGGGGCTTCATGCAGACCTACTATGACGACCACCTGAGGGACCTGGGTCCGC[T/G]CACCAAGGCCTGGTTCCTCGAATCCAAAGACAGCCTCTTGAAGAAGACCCACAGCCTGTGCCCCAGGCTTGTCTGTGGGGACAAGGACCAGGGTTAAAATGTTCATAAAAgccaggtgtg	T	G	0.654919	0.00942578	0.345081	0.00942578	0.444934	0.0062001	0.419971	0.0062001	0.135095	0.0062001	1362	2	0.349848	0.419971	0.452	6.83909	0.00891841	0.0088	606	572	184	0.921536	19	50140305	-1224	3	35	344	locus-region	G/T	0.494854	0.050463	YES	2	2	2	1	reference
APOC3_rs17251212	APOC3	http://www.ncbi.nlm.nih.gov/entrez/query.fcgi?db=gene&cmd=Retrieve&dopt=full_report&list_uids=345	rs17251212		http://www.ncbi.nlm.nih.gov/SNP/snp_ref.cgi?rs=17251212	A	G	GTCTGGGAAGGGCACAGCGTTAGGAGGGAGAGGGAGGTGTGAGTCCCTCC[A/G]TGGACCCGCTGCTTTGTACTTCTCTATCTCATTTCCTTTTCAGCACCACT	GTCTGGGAAGGGCACAGCGTTAGGAGGGAGAGGGAGGTGTGAGTCCCTCC[A/G]TGGACCCGCTGCTTTGTACTTCTCTATCTCATTTCCTTTTCAGCACCACT	A	G	0.031227	0.00332047	0.968773	0.00332047	0.000734754	0.000719127	0.0609846	0.000719127	0.938281	0.000719127	1361	2	0.0586735	0.0609846	0.0605038	0.0859266	0.769421	1	1	83	1277	0.934441	22		2280	17	35.1	345	locus	A/G	0.0798612	0.183174	YES
APOC3_rs17251284	APOC3	http://www.ncbi.nlm.nih.gov/entrez/query.fcgi?db=gene&cmd=Retrieve&dopt=full_report&list_uids=345	rs17251284		http://www.ncbi.nlm.nih.gov/SNP/snp_ref.cgi?rs=17251284	A	G	CCGCTGGCCTCCCTCCCCATCCCCCCTGCCAGCTGCCTCCATTCCCACCC[A/G]CCCCTGCCCTGGTGAGATCCCAACAATGGAATGGAGGTGCTCCAGCCTCC	CCGCTGGCCTCCCTCCCCATCCCCCCTGCCAGCTGCCTCCATTCCCACCC[A/G]CCCCTGCCCTGGTGAGATCCCAACAATGGAATGGAGGTGCTCCAGCCTCC	A	G	0.0535977	0.00434909	0.946402	0.00434909	0.00367107	0.0015349	0.0998532	0.0015349	0.896476	0.0015349	1362	2	0.0963038	0.0998532	0.10145	0.337393	0.561338	0.5826	5	136	1221	0.851002	22		-1674	17	35.1	345	intron	A/G	0.0798612	0.183174	YES
APOC3_rs17257810	APOC3	http://www.ncbi.nlm.nih.gov/entrez/query.fcgi?db=gene&cmd=Retrieve&dopt=full_report&list_uids=345	rs17257810	rs5130	http://www.ncbi.nlm.nih.gov/SNP/snp_ref.cgi?rs5130	A	G	GGGAGATGTGAAAGGTCAAGGCTGTCATTGTTTTCTGTGCAAACAGCACC[A/G]CCTGGAGTTGCACAACCTGGTGGCTCTGAGCAGGGTAGGACAGAGGGAGG	CCTCCCTCTGTCCTACCCTGCTCAGAGCCACCAGGTTGTGCAACTCCAGG[C/T]GGTGCTGTTTGCACAGAAAACAATGACAGCCTTGACCTTTCACATCTCCC	C	T	0.862702	0.00666177	0.137298	0.00666177	0.746696	0.00335257	0.232012	0.00335257	0.0212922	0.00335257	1362	2	0.208835	0.232012	0.236895	0.578659	0.446838	0.4284	1017	316	29	0.826379	11	116208356	-11448161	17	35.1	345	intron	C/T	0.186632	0.241836	YES
APOC4_rs12721108	APOC4	http://www.ncbi.nlm.nih.gov/entrez/query.fcgi?db=gene&cmd=Retrieve&dopt=full_report&list_uids=346	rs12721108		http://www.ncbi.nlm.nih.gov/SNP/snp_ref.cgi?rs=12721108	A	C	GTTCTCCTGTGACCCCCACCCTGTCTGAGCTACCTCTGTGGACAGTGGAGGGAGAGCAGGAGGTGACTTTCTGCCCCCAGGGGCAGACATTGGCTTAGCCTTGCTGTCAGTTCCTCTTTC[A/C]GGGCCAGACCTTCTACCCACGCATCTGGACAAAGCCTCGCCTACAGAGACCAGCCGTCACGCGGGGGCCACATGTAGCTGGCTGTGTGCCTTGGCCGGTGACTTATCCTGTCTCCCCAGG	CCTGGGGAGACAGGATAAGTCACCGGCCAAGGCACACAGCCAGCTACATGTGGCCCCCGCGTGACGGCTGGTCTCTGTAGGCGAGGCTTTGTCCAGATGCGTGGGTAGAAGGTCTGGCCC[G/T]GAAAGAGGAACTGACAGCAAGGCTAAGCCAATGTCTGCCCCTGGGGGCAGAAAGTCACCTCCTGCTCTCCCTCCACTGTCCACAGAGGTAGCTCAGACAGGGTGGGGGTCACAGGAGAAC	G	T	0.00881705	0.00178383	0.991183	0.00178383			0.0176341	3.14563e-05	0.982366	3.14563e-05	1361	2	0.0173259	0.0176341	0.0174786	0.107695	0.742783	1	0	24	1337	0.740927	19	50139081	1223	3	35	346	intron	G/T	0.0277723	0.11452	YES	2	2	2	1	reference
APOC4_rs5157	APOC4	http://www.ncbi.nlm.nih.gov/entrez/query.fcgi?db=gene&cmd=Retrieve&dopt=full_report&list_uids=346	rs5157		http://www.ncbi.nlm.nih.gov/SNP/snp_ref.cgi?rs=5157	A	G	GGGCAGACATTGGCTTAGCCTTGCTGTCAGTTCCTCTTTCCGGGCCAGACCTTCTACCCACGCATCTGGACAAAGCCTCGCCTACAGAGACCAGCCGTCACGCGGGGGCCACATGTAGCT[A/G]GCTGTGTGCCTTGGCCGGTGACTTATCCTGTCTCCCCAGGACTGTTTCTCCTTTTGTAGAACGGGGTAATAATATCTACCTCAGGGTTATCGTGAGAATTAAGAGTTACTACATACGATG	CATCGTATGTAGTAACTCTTAATTCTCACGATAACCCTGAGGTAGATATTATTACCCCGTTCTACAAAAGGAGAAACAGTCCTGGGGAGACAGGATAAGTCACCGGCCAAGGCACACAGC[T/C]AGCTACATGTGGCCCCCGCGTGACGGCTGGTCTCTGTAGGCGAGGCTTTGTCCAGATGCGTGGGTAGAAGGTCTGGCCCGGAAAGAGGAACTGACAGCAAGGCTAAGCCAATGTCTGCCC	T	C	0.526799	0.00974797	0.473201	0.00974797	0.287078	0.00675116	0.479442	0.00675116	0.23348	0.00675116	1362	2	0.374281	0.479442	0.498564	2.00349	0.156938	0.1554	391	653	318	0.813325	19	50139001	40598148	3	35	346	intron	C/T	0.445	0.149286	YES	2	2	2	1	reference
APOM_rs3130050	APOM	http://www.ncbi.nlm.nih.gov/entrez/query.fcgi?db=gene&cmd=Retrieve&dopt=full_report&list_uids=55937	rs3130050		http://www.ncbi.nlm.nih.gov/SNP/snp_ref.cgi?rs=3130050	A	G	ATAGCTATGTCCAAGGCTTTAAGCTCAAGAGACTCAAGCTATGCCATAAAAATTAGTAATTTCACTCAACAGTCTATCAAGGACCTATCTCCATTATGGGTTCTGATTTCTACCCTTTAA[A/G]AACACAGCATAGACCTGACCAATGTCTATCAGTAAGACACACTTGCTTAGGGTTCCTGTGCTGTTTCCCTTCCCAAAGGCCAGAGCCATGCCTGTCCCTTTGGGTTGGGGTCCACCCATG	ATAGCTATGTCCAAGGCTTTAAGCTCAAGAGACTCAAGCTATGCCATAAAAATTAGTAATTTCACTCAACAGTCTATCAAGGACCTATCTCCATTATGGGTTCTGATTTCTACCCTTTAA[G/A]AACACAGCATAGACCTGACCAATGTCTATCAGTAAGACACACTTGCTTAGGGTTCCTGTGCTGTTTCCCTTCCCAAAGGCCAGAGCCATGCCTGTCCCTTTGGGTTGGGGTCCACCCATG	G	A	0.951175	0.00412097	0.0488253	0.00412097	0.904552	0.00121456	0.0932452	0.00121456	0.00220264	0.00121456	1362	2	0.0885691	0.0932452	0.0928827	0.0207484	0.885467	1	1232	127	3	0.968961	6	31726740	11192	2	35	55937	intron	A/G	0.15427	0.230945	YES	2	2	2	1	reference
APOM_rs7029	APOM	http://www.ncbi.nlm.nih.gov/entrez/query.fcgi?db=gene&cmd=Retrieve&dopt=full_report&list_uids=55937	rs7029		http://www.ncbi.nlm.nih.gov/SNP/snp_ref.cgi?rs=7029	A	G	TTCCTCAAAATAGCTTCCAGAAAAGTGAATAAACCACAAATGGTTGATTTATTTCTGACTCTCAGCCCGTCTCTCACGAAGACAGAGCCTATTGACCAAAAACTTCAGGATCTGCATCTG[A/G]GCAGATCCCAGGAAGGGGAAGTCAAAGGGCCCAGGTCAGAGGCCCAAGTTCAGACTTCAGCAGCAGACTAGGGTCAGACTTTACCAAAGTCAGAACTCGAGGTTCATGTAAGTCCTTAGA	TCTAAGGACTTACATGAACCTCGAGTTCTGACTTTGGTAAAGTCTGACCCTAGTCTGCTGCTGAAGTCTGAACTTGGGCCTCTGACCTGGGCCCTTTGACTTCCCCTTCCTGGGATCTGC[C/T]CAGATGCAGATCCTGAAGTTTTTGGTCAATAGGCTCTGTCTTCGTGAGAGACGGGCTGAGAGTCAGAAATAAATCAACCATTTGTGGTTTATTCACTTTTCTGGAAGCTATTTTGAGGAA	C	T	0.669971	0.00903417	0.330029	0.00903417	0.450073	0.00599977	0.439794	0.00599977	0.110132	0.00599977	1362	2	0.344441	0.439794	0.44222	0.0409751	0.839586	0.8561	613	599	150	0.907122	6	31737932		2	35	55937	locus-region	C/T	0.491575	0.0643547	YES	2	2	2	1	reference
APOM_rs707921	APOM	http://www.ncbi.nlm.nih.gov/entrez/query.fcgi?db=gene&cmd=Retrieve&dopt=full_report&list_uids=55937	rs707921		http://www.ncbi.nlm.nih.gov/SNP/snp_ref.cgi?rs=707921	A	C	CGAAAAGTGTGTGGAGGAATTCAAGTCCCTGACTTCCTGCCTGGACTCCAAAGCCTTCTTATTGACTCCTAGGAATCAAGGTAAGGTGTTAAAATCTCATAAAACAGGATTAGGACTCAC[A/C]AAGTCTTCTGGTGTTACAGGGTGAAAGAGGCTCGTGTGATGTCACCAGAGGGATGTGGCTAAGAGCTGTGATGTCACCTGAGGGAGGCAGGATGGGTTCTGGGCTACTCAAAAGAGAGGT	ACCTCTCTTTTGAGTAGCCCAGAACCCATCCTGCCTCCCTCAGGTGACATCACAGCTCTTAGCCACATCCCTCTGGTGACATCACACGAGCCTCTTTCACCCTGTAACACCAGAAGACTT[G/T]GTGAGTCCTAATCCTGTTTTATGAGATTTTAACACCTTACCTTGATTCCTAGGAGTCAATAAGAAGGCTTTGGAGTCCAGGCAGGAAGTCAGGGACTTGAATTCCTCCACACACTTTTCG	G	T	0.0345081	0.00347324	0.965492	0.00347324	0.000734214	0.000724082	0.0675477	0.000724082	0.931718	0.000724082	1362	2	0.0644145	0.0675477	0.0666345	0.255798	0.613022	1	1	92	1269	0.934851	6	31733520	-83059	2	35	55937	intron	G/T	0.215133	0.247557	YES	2	2	2	1	reference
ATP1A1_rs1407716	ATP1A1	http://www.ncbi.nlm.nih.gov/entrez/query.fcgi?db=gene&cmd=Retrieve&dopt=full_report&list_uids=476	rs1407716		http://www.ncbi.nlm.nih.gov/SNP/snp_ref.cgi?rs=1407716	A	G	TTAAATCTGTATTTTGCTTTTGATGCCACACAGTAATTTCAGATGCACAGTGCCCTTGAATTCTCACAAGTCTTTGAGGTAAAGAAAAAGGTAAGGCATGACCAAGTCTGAGGCGCAGAA[A/G]GAAATCTCAGATATGAGAGAGACACCTTGGAAAATGGGTAAGCAAAGGAGGAAAAGTCCTTTTTTTTTTTTTTTTTTAAAAAAAAGCCTTCTTTTCTTCCCTTGGAAGAGTGGCTTCTGA	TCAGAAGCCACTCTTCCAAGGGAAGAAAAGAAGGCttttttttaaaaaaaaaaaaaaaaaaGGACTTTTCCTCCTTTGCTTACCCATTTTCCAAGGTGTCTCTCTCATATCTGAGATTTC[C/T]TTCTGCGCCTCAGACTTGGTCATGCCTTACCTTTTTCTTTACCTCAAAGACTTGTGAGAATTCAAGGGCACTGTGCATCTGAAATTACTGTGTGGCATCAAAAGCAAAATACAGATTTAA	C	T	0.0561674	0.00430961	0.943833	0.00430961	0.000734214	0.000811625	0.110866	0.000811625	0.888399	0.000811625	1362	2	0.100405	0.110866	0.106025	2.83956	0.0919694	0.12	1	151	1210	0.932462	1	116625520	135		35	476	locus-region, 5'	C/T	0.384199	0.210928	YES	2	2	2	1	reference
ATP1A1_rs1407717	ATP1A1	http://www.ncbi.nlm.nih.gov/entrez/query.fcgi?db=gene&cmd=Retrieve&dopt=full_report&list_uids=476	rs1407717		http://www.ncbi.nlm.nih.gov/SNP/snp_ref.cgi?rs=1407717	A	G	TGAAGGTCCTTTCAGGAGGATCCCAGAGTTCTAGCTGTGTTCCGGTGTGAAGAAAGGGCAAAAAAT[A/G]TAAGAAACATTATCTTAAATCTGTATTTTGCTTTTGATGCCACACAGTAATTTCAGATGCACAGTGCCCTTGAATTCTCACAAGTCTTTGAGGTAAAGAAAAAGGTAAGGCATGACCAAG	CTTGGTCATGCCTTACCTTTTTCTTTACCTCAAAGACTTGTGAGAATTCAAGGGCACTGTGCATCTGAAATTACTGTGTGGCATCAAAAGCAAAATACAGATTTAAGATAATGTTTCTTA[C/T]ATTTTTTGCCCTTTCTTCACACCGGAACACAGCTAGAACTCTGGGATCCTCCTGAAAGGACCTTCA	C	T	0.998164	0.000819369	0.00183554	0.000819369	0.996329	3.00796e-06	0.00367107	3.00796e-06			1362	2	0.00365762	0.00367107	0.00366433	0.00460573	0.945893	1	1357	5	0	0.818819	1	116625655	10179		35	476	locus-region, 5'	C/T			YES	2	2	2	1	reference
ATP1A1_rs6428896	ATP1A1	http://www.ncbi.nlm.nih.gov/entrez/query.fcgi?db=gene&cmd=Retrieve&dopt=full_report&list_uids=476	rs6428896		http://www.ncbi.nlm.nih.gov/SNP/snp_ref.cgi?rs=6428896	A	G	CATGGAACATGATGAGAGTGAGGATTAATCACTCCCAGTCCTCTGGGAGGGGGGAAGTGACCTGAACTTTCTAATTGAAAAAGTAGGAAGTGTGTGCCCAATGCCCAGATGAGTGGGAAG[A/G]TTACTGTAGTTGATTGAGGAAATGCCGTATTTATCATTCACCCTTCCCATGACCTTTGTTTTTCCCTAATGCCTTAAAAAATAATAAGGAAACATTGTCCTACCTGATTCTACCACTGTT	CATGGAACATGATGAGAGTGAGGATTAATCACTCCCAGTCCTCTGGGAGGGGGGAAGTGACCTGAACTTTCTAATTGAAAAAGTAGGAAGTGTGTGCCCAATGCCCAGATGAGTGGGAAG[A/G]TTACTGTAGTTGATTGAGGAAATGCCGTATTTATCATTCACCCTTCCCATGACCTTTGTTTTTCCCTAATGCCTTAAAAAATAATAAGGAAACATTGTCCTACCTGATTCTACCACTGTT	A	G	0.970264	0.003246	0.0297357	0.003246	0.941263	0.000716749	0.0580029	0.000716749	0.000734214	0.000716749	1362	2	0.0560381	0.0580029	0.0577029	0.0368132	0.847846	1	1282	79	1	0.915503	1	116635834	-5407		35	476	intron	A/G	0.371351	0.218573	YES	2	2	2	1	reference
ATP1A1_rs757578	ATP1A1	http://www.ncbi.nlm.nih.gov/entrez/query.fcgi?db=gene&cmd=Retrieve&dopt=full_report&list_uids=476	rs757578		http://www.ncbi.nlm.nih.gov/SNP/snp_ref.cgi?rs=757578	A	G	AGCTAGGCCACAAAGGGTACTGAGGAGAGGAGGGGAAGAAATTTACAATGACCTTAAAAATTAGCTGCCGGCACAGGCTTCCTTGTTAGCCAATTATCAGCAGGGCTTTAGTCACTCTCC[A/G]CCCACATTTTAATCCCCATGTGGAAAAATCCCAACATGAAATATTCTTCTGAACATTTGGACGCTCACAATAAGTCACAGGACAAACACACACACAAACACACACACAAGTAAACTAATG	CATTAGTTTACTTGTGTGTGTGTTTGTGTGTGTGTTTGTCCTGTGACTTATTGTGAGCGTCCAAATGTTCAGAAGAATATTTCATGTTGGGATTTTTCCACATGGGGATTAAAATGTGGG[C/T]GGAGAGTGACTAAAGCCCTGCTGATAATTGGCTAACAAGGAAGCCTGTGCCGGCAGCTAATTTTTAAGGTCATTGTAAATTTCTTCCCCTCCTCTCCTCAGTACCCTTTGTGGCCTAGCT	C	T	0.905286	0.00558109	0.0947137	0.00558109	0.818649	0.00222842	0.173275	0.00222842	0.00807636	0.00222842	1362	2	0.156782	0.173275	0.171486	0.148171	0.700289	0.8746	1115	236	11	0.944257	1	116630427	2567		35	476	intron	C/T	0.082794	0.185855	YES	2	2	2	1	reference
ATP1A1_rs850602	ATP1A1	http://www.ncbi.nlm.nih.gov/entrez/query.fcgi?db=gene&cmd=Retrieve&dopt=full_report&list_uids=476	rs850602		http://www.ncbi.nlm.nih.gov/SNP/snp_ref.cgi?rs=850602	C	G	TGCAGATATATTTCATCATAA[C/G]TCACAAAGGAACTAGTAAGTGAGGTCTAAAACCAGATAAAGAGATTCACTGTAAAGTCACAAAGGAACAAAGGAATGAGGTCTATTGATCAAAAATCCCTTTGCTCAGGATGCAAATAAA	TTTATTTGCATCCTGAGCAAAGGGATTTTTGATCAATAGACCTCATTCCTTTGTTCCTTTGTGACTTTACAGTGAATCTCTTTATCTGGTTTTAGACCTCACTTACTAGTTCCTTTGTGA[C/G]TTATGATGAAATATATCTGCA	C	G	0.242291	0.00811113	0.757709	0.00811113	0.0543319	0.0048866	0.375918	0.0048866	0.56975	0.0048866	1362	2	0.299764	0.375918	0.367172	0.772762	0.379364	0.4088	74	512	776	0.826132	1	116632994	27760		35	476	intron	C/G			YES	2	2	2	1	reference
ATP1A1_rs850610	ATP1A1	http://www.ncbi.nlm.nih.gov/entrez/query.fcgi?db=gene&cmd=Retrieve&dopt=full_report&list_uids=476	rs850610		http://www.ncbi.nlm.nih.gov/SNP/snp_ref.cgi?rs=850610	A	G	TGACGGCAGGGCCAGTCACACAAGACGTCTCTTGTGAGGTCAGGCTGGCACTGGTGGTATCCGTACTGCGACTCCCTGTATGTCTACTTTC[A/G]GCATCCCTGGAGAAGACCAACGCACATACGCTGCTGCGATGAAGGTCATGGGCATTTCCTGATGCAAAAGATTTGAAACACTCTGAGACTTTAGCTTTTGACAAGGGGACCCCAGAGAAC	TGACGGCAGGGCCAGTCACACAAGACGTCTCTTGTGAGGTCAGGCTGGCACTGGTGGTATCCGTACTGCGACTCCCTGTATGTCTACTTTC[A/G]GCATCCCTGGAGAAGACCAACGCACATACGCTGCTGCGATGAAGGTCATGGGCATTTCCTGATGCAAAAGATTTGAAACACTCTGAGACTTTAGCTTTTGACAAGGGGACCCCAGAGAAC	A	G	0.681351	0.00913223	0.318649	0.00913223	0.474302	0.00595875	0.414097	0.00595875	0.111601	0.00595875	1362	2	0.339949	0.414097	0.434224	2.92615	0.0871549	0.0953	646	564	152	0.97398	1	116660754			35	476	locus-region, 3'	A/G	0.47571	0.107494	YES	2	2	2	1	reference
ATP5A1_rs1800636	ATP5A1	http://www.ncbi.nlm.nih.gov/entrez/query.fcgi?db=gene&cmd=Retrieve&dopt=full_report&list_uids=498	rs1800636		http://www.ncbi.nlm.nih.gov/SNP/snp_ref.cgi?rs=1800636	A	G	GATTTAAAGATCTAAAATATAGTTTTAATGATGAGAGATGATTTGGTGCTGTTATGTTATGAAAATTTGTATTTGATTGGTTACAGTTAGGTAGCTTTTAATTTCACTTTCTACTAACTC[A/G]AAGAGTACAGGTTTTGATTAATTTTTGAAACTGTTTATGGAGCTTCTCACACATAAATAAGATGATAATCAAATTTGTCTTAAGATTTCCATTTGGCCTTCATCACTTTATTTCATACTG	GATTTAAAGATCTAAAATATAGTTTTAATGATGAGAGATGATTTGGTGCTGTTATGTTATGAAAATTTGTATTTGATTGGTTACAGTTAGGTAGCTTTTAATTTCACTTTCTACTAACTC[A/G]AAGAGTACAGGTTTTGATTAATTTTTGAAACTGTTTATGGAGCTTCTCACACATAAATAAGATGATAATCAAATTTGTCTTAAGATTTCCATTTGGCCTTCATCACTTTATTTCATACTG	A	G	0.440162	0.00959754	0.559838	0.00959754	0.198238	0.0066795	0.483847	0.0066795	0.317915	0.0066795	1362	2	0.371394	0.483847	0.492839	0.453341	0.500753	0.5153	270	659	433	0.966619	18	41924418	-10020		35	498	intron	A/G	0.472778	0.113446	YES	2	2	2	1	reference
ATP5A1_rs3745004	ATP5A1	http://www.ncbi.nlm.nih.gov/entrez/query.fcgi?db=gene&cmd=Retrieve&dopt=full_report&list_uids=498	rs3745004		http://www.ncbi.nlm.nih.gov/SNP/snp_ref.cgi?rs=3745004	A	C	AAGTGCCTTCTCAAATGTTCACCACCCCCAGTGATAAGATAAATGCACACAGACACAATTTTATGACAGCCATTTTGTTGCCACACAGAAGGGCCACTTGGGCAGTGTATTTAGGCCTGC[A/C]TGGTTAAAAACAGCCAGGTGCCTATGAGGTCTCCTATGTCATTAGTCTGTAAGTACTTAGTAAAAAGCAGTATTTGAATCTCATGGTTCATTGCTGTAACAGAAAGGGCTGGACTCTATA	AAGTGCCTTCTCAAATGTTCACCACCCCCAGTGATAAGATAAATGCACACAGACACAATTTTATGACAGCCATTTTGTTGCCACACAGAAGGGCCACTTGGGCAGTGTATTTAGGCCTGC[A/C]TGGTTAAAAACAGCCAGGTGCCTATGAGGTCTCCTATGTCATTAGTCTGTAAGTACTTAGTAAAAAGCAGTATTTGAATCTCATGGTTCATTGCTGTAACAGAAAGGGCTGGACTCTATA	A	C	0.109031	0.00594482	0.890969	0.00594482	0.0110132	0.00255646	0.196035	0.00255646	0.792952	0.00255646	1362	2	0.175413	0.196035	0.194286	0.110377	0.739715	0.8904	15	267	1080	0.838494	18	41914398	20300		35	498	locus-region, 3'	A/C	0.199537	0.244854	YES	2	2	2	1	reference
ATP5A1_rs7228550	ATP5A1	http://www.ncbi.nlm.nih.gov/entrez/query.fcgi?db=gene&cmd=Retrieve&dopt=full_report&list_uids=498	rs7228550	rs2578189	http://www.ncbi.nlm.nih.gov/SNP/snp_ref.cgi?rs2578189	A	G	GTGATCCACCCGCCTCGGCCTCCCAAAGCGCTGGGATTACAGGCGTGAGCCACCGTGCCCGGCTGACCTAAACCAGTTTTATCTAATTAGCTGCTAAAAACAACCTGCAGTGACTCTAAG[A/G]ATCGTTTTACCTAGTTGCCATTACTTGCCAATCAAAACTTGCCAGCTCCCCAAAACCTTACTAGTGACAATGAACTTTCTTAAAGAACAATATACAACAGTTCTCTTTTTTTGTTGTTTG	caaacaacaaaaaaagagaaCtgttgtatattgttctttaagaaagttcattgtcactagtaaggttttggggagctggcaagttttgattggcaagtaatggcaactaggtaaaacgat[C/T]cttagagtcactgcaggttgtttttagcagctaattagataaaactggtttaggtcagccgggcacggtggctcacgcctgtaatcccagcgctttgggaggccgaggcgggtggatcac	C	T	0.128855	0.00638539	0.871145	0.00638539	0.0154185	0.00296157	0.226872	0.00296157	0.757709	0.00296157	1362	2	0.199302	0.226872	0.224502	0.151789	0.696831	0.8116	21	309	1032	0.907514	18	41934698			35	498	.	C/T	0.231111	0.249285	YES	2	2	2	1	reference
ATP5A1_rs8085233	ATP5A1	http://www.ncbi.nlm.nih.gov/entrez/query.fcgi?db=gene&cmd=Retrieve&dopt=full_report&list_uids=498	rs8085233		http://www.ncbi.nlm.nih.gov/SNP/snp_ref.cgi?rs=8085233	A	G	CTAGTGCTTTGGGAGGTCAAGGTGGGAGGATCACTGAAGGCCAGGCAGGGCAACAGAGTGAGACCCTAGCTGTACAAAATATTTTTAAATTTTTAAAAAAAGAATATAAATCCAGTGTTA[A/G]GCAGGGACTCATGGAGAGCCTAGATGGCCACCTGGTCTTCCCTGAGTCCTTAAAGCTTCCATTATTAAAAGCTCTGCAATCTATGGATCATCATGGAAGGGCTAAAATAATCCAAATGAT	CTAGTGCTTTGGGAGGTCAAGGTGGGAGGATCACTGAAGGCCAGGCAGGGCAACAGAGTGAGACCCTAGCTGTACAAAATATTTTTAAATTTTTAAAAAAAGAATATAAATCCAGTGTTA[A/G]GCAGGGACTCATGGAGAGCCTAGATGGCCACCTGGTCTTCCCTGAGTCCTTAAAGCTTCCATTATTAAAAGCTCTGCAATCTATGGATCATCATGGAAGGGCTAAAATAATCCAAATGAT	A	G	0.92511	0.00513222	0.0748899	0.00513222	0.858297	0.00219761	0.133627	0.00219761	0.00807636	0.00219761	1362	2	0.128963	0.133627	0.138563	1.72817	0.188644	0.1663	1169	182	11	0.936747	18	41913593	13406354		35	498	locus-region, 3'	A/G	0.293367	0.24621	YES	2	2	2	1	reference
ATP5B_rs12229457	ATP5B	http://www.ncbi.nlm.nih.gov/entrez/query.fcgi?db=gene&cmd=Retrieve&dopt=full_report&list_uids=506	rs12229457		http://www.ncbi.nlm.nih.gov/SNP/snp_ref.cgi?rs=12229457	A	T	TTACGATGTTGCCCGTGGGGTGCAAAAGATCCTGCAGGTGAGTATATTACTATGTGGGATCAGTGTCCGGAAAGTCAAAAAGAGGGCCTGTGGGGACTATATGAGGACTGGATCTTTCTT[A/T]GTGATTTGTTTTGGAGCAAGGAAAGTTGAGGCTGGCAATTGCTAGTGAGAGCTAATGAGGTCTCTTGAGTTTCCAGGTACTTAACGCTTTGGAATGCAATATTTTTCTTTCTTTTTTTTT	aaaaaaaaagaaagaaaaaTATTGCATTCCAAAGCGTTAAGTACCTGGAAACTCAAGAGACCTCATTAGCTCTCACTAGCAATTGCCAGCCTCAACTTTCCTTGCTCCAAAACAAATCAC[T/A]AAGAAAGATCCAGTCCTCATATAGTCCCCACAGGCCCTCTTTTTGACTTTCCGGACACTGATCCCACATAGTAATATACTCACCTGCAGGATCTTTTGCACCCCACGGGCAACATCGTAA	T	A	0.652717	0.00914782	0.347283	0.00914782	0.427313	0.00614915	0.450808	0.00614915	0.12188	0.00614915	1362	2	0.35059	0.450808	0.453355	0.0430109	0.835705	0.8576	582	614	166	0.908202	12	55319947			35	506	intron	A/T	0.391111	0.206368	YES	2	2	2	1	reference
ATP5B_rs2255074	ATP5B	http://www.ncbi.nlm.nih.gov/entrez/query.fcgi?db=gene&cmd=Retrieve&dopt=full_report&list_uids=506	rs2255074		http://www.ncbi.nlm.nih.gov/SNP/snp_ref.cgi?rs=2255074	A	G	CATCACCCTACAGCAGTTCAGGCTGTGTGGTTCGCAGGAAGCATACACTGGCTTTTTGATTCTTGCTAGTTCCCAGCTCACAGTTTGGGAGGATCCAACACCAACCTTTACGTGAAGTGG[A/G]GGCCCAAGGACAGTGAGGAGCTGGGTGGTCCCAGCCTGGAGCTGTGCCAGCCTGACATGGGTGAGTATGGGGACCAGCCCCGGGGAAGGCCTGAGGGATGCCTACTCCCTCCCTGGCTGA	TCAGCCAGGGAGGGAGTAGGCATCCCTCAGGCCTTCCCCGGGGCTGGTCCCCATACTCACCCATGTCAGGCTGGCACAGCTCCAGGCTGGGACCACCCAGCTCCTCACTGTCCTTGGGCC[C/T]CCACTTCACGTAAAGGTTGGTGTTGGATCCTCCCAAACTGTGAGCTGGGAACTAGCAAGAATCAAAAAGCCAGTGTATGCTTCCTGCGAACCACACAGCCTGAACTGCTGTAGGGTGATG	C	T	0.639501	0.00924337	0.360499	0.00924337	0.41116	0.00625656	0.456681	0.00625656	0.132159	0.00625656	1362	2	0.354782	0.456681	0.461079	0.123904	0.724838	0.7289	560	622	180	0.961986	12	55316293	-47424873		35	506	mrna-utr	C/T	0.299875	0.244974	YES	2	2	2	1	reference
ATP5C1_rs10508335	ATP5C1	http://www.ncbi.nlm.nih.gov/entrez/query.fcgi?db=gene&cmd=Retrieve&dopt=full_report&list_uids=509	rs10508335		http://www.ncbi.nlm.nih.gov/SNP/snp_ref.cgi?rs=10508335	A	G	TCTATAAGATGGAGATTAAAAGATTGTTAGGATTAAATGAGCTAATATTTTAAAATATCGAGAATCTGACAGGGAGTAAGTGCTATATTCTTGGTTAAAT[A/G]TCTGCTCTATGTAAAATTAATCATCAGCTCCCTGTAGCCTTTAGTGGTGCTCTTCTGTGTACTGGCACTCTGACTCTCTGAGGATACAATAACAAAACGC	TCTATAAGATGGAGATTAAAAGATTGTTAGGATTAAATGAGCTAATATTTTAAAATATCGAGAATCTGACAGGGAGTAAGTGCTATATTCTTGGTTAAAT[G/A]TCTGCTCTATGTAAAATTAATCATCAGCTCCCTGTAGCCTTTAGTGGTGCTCTTCTGTGTACTGGCACTCTGACTCTCTGAGGATACAATAACAAAACGC	G	A	0.122247	0.00613831	0.877753	0.00613831	0.010279	0.00254608	0.223935	0.00254608	0.765786	0.00254608	1362	2	0.191577	0.223935	0.214605	2.57459	0.108592	0.1304	14	305	1043	0.840934	10	7891420			35	509	locus-region, 3'	A/G	0.22203	0.24843	YES	2	2	2	1	reference
ATP5C1_rs1244423	ATP5C1	http://www.ncbi.nlm.nih.gov/entrez/query.fcgi?db=gene&cmd=Retrieve&dopt=full_report&list_uids=509	rs1244423		http://www.ncbi.nlm.nih.gov/SNP/snp_ref.cgi?rs=1244423	A	G	TAGCCTCAACTCAGGATAAGACAGCATGATCATAAAAAAGTTAAGAGAAAGAATGTAATTACAAGTTAAAATAGAAACTTCTTTCCCATTTCCAGCTCTTTACAACTTTATTTCCAAGAT[A/G]AATTCATAATCAAACAAGTATAAAAGCATCTAAAAACACAATATAAATTCTTTTTAAACTGTCATATCTCATCTCTTTTCCATTAAGAAGACTAATTAAGGATGGATTACATAAATTTCT	AGAAATTTATGTAATCCATCCTTAATTAGTCTTCTTAATGGAAAAGAGATGAGATATGACAGTTTAAAAAGAATTTATATTGTGTTTTTAGATGCTTTTATACTTGTTTGATTATGAATT[C/T]ATCTTGGAAATAAAGTTGTAAAGAGCTGGAAATGGGAAAGAAGTTTCTATTTTAACTTGTAATTACATTCTTTCTCTTAACTTTTTTATGATCATGCTGTCTTATCCTGAGTTGAGGCTA	C	T	0.363069	0.00904343	0.636931	0.00904343	0.123348	0.00622447	0.479442	0.00622447	0.39721	0.00622447	1362	2	0.355547	0.479442	0.4625	1.82765	0.176405	0.1997	168	653	541	0.914845	10	7879918	7062		35	509	intron	C/T	0.437318	0.165565	YES	2	2	2	1	reference
ATP5C1_rs1244434	ATP5C1	http://www.ncbi.nlm.nih.gov/entrez/query.fcgi?db=gene&cmd=Retrieve&dopt=full_report&list_uids=509	rs1244434		http://www.ncbi.nlm.nih.gov/SNP/snp_ref.cgi?rs=1244434	A	G	AGACACCATGAGACAGTATTCTGTGATGCTGATAGAACATTGGTGACCAGGCTGTGAATGGGTTAGTCCTAACACAGCTGTGCTTAGAAAGTAAAATAAGAGAAGAATGCTTAGGATAGC[A/G]AGGCTGATGGATCCAACTAACAACTTACACAAAGGTCTCTGTTGGCTCAAAAAGTTCTAGTTGTGTCTCTCTGGCATTCTGCCCAGTTTCTGCCCTTGAAAAGTAACACTTAAGGAACAC	GTGTTCCTTAAGTGTTACTTTTCAAGGGCAGAAACTGGGCAGAATGCCAGAGAGACACAACTAGAACTTTTTGAGCCAACAGAGACCTTTGTGTAAGTTGTTAGTTGGATCCATCAGCCT[C/T]GCTATCCTAAGCATTCTTCTCTTATTTTACTTTCTAAGCACAGCTGTGTTAGGACTAACCCATTCACAGCCTGGTCACCAATGTTCTATCAGCATCACAGAATACTGTCTCATGGTGTct	C	T	0.405515	0.00941948	0.594485	0.00941948	0.164706	0.00653752	0.481618	0.00653752	0.353676	0.00653752	1360	2	0.365913	0.481618	0.482145	0.00162736	0.967822	1	224	655	481	0.942197	10	7886980	-14123		35	509	intron	C/T	0.48207	0.0929711	YES	2	2	2	1	reference
ATP5C1_rs2778475	ATP5C1	http://www.ncbi.nlm.nih.gov/entrez/query.fcgi?db=gene&cmd=Retrieve&dopt=full_report&list_uids=509	rs2778475		http://www.ncbi.nlm.nih.gov/SNP/snp_ref.cgi?rs=2778475	A	G	GCAGGTTACTCAGTGTCTGTCCCACCAGTTCCTCATCTGTCAAATATATGCAATAAAAGTGCACAATTCAGTGGGTTAGTGTGAGGATTAGAGTATTTGCAAAGCATGTAGGACAATGGG[A/G]GAAATGCTGATAGGGATCCAAATGCTGTATATCAGTAGAGAAATGAAGAGTTTTTAAGTACAGTTTCTACATCAAATGTAATGTAAGAAGATTGCTTGGACTTGCGAAAAGAGGAAAAGA	TCTTTTCCTCTTTTCGCAAGTCCAAGCAATCTTCTTACATTACATTTGATGTAGAAACTGTACTTAAAAACTCTTCATTTCTCTACTGATATACAGCATTTGGATCCCTATCAGCATTTC[T/C]CCcattgtcctacatgctttgcaaatactctaatcctcacactaacccactgaattgtgcacttttattgcatatatttgacagatgaggaactggtgggacagacactgagtaacctgc	T	C	0.290382	0.00873079	0.709618	0.00873079	0.0859031	0.00560157	0.408957	0.00560157	0.50514	0.00560157	1362	2	0.327199	0.408957	0.41212	0.0802281	0.776989	0.799	117	557	688	0.897872	10	7872857	-3814		35	509	intron	C/T	0.404297	0.196704	YES	2	2	2	1	reference
ATP5C1_rs2802460	ATP5C1	http://www.ncbi.nlm.nih.gov/entrez/query.fcgi?db=gene&cmd=Retrieve&dopt=full_report&list_uids=509	rs2802460		http://www.ncbi.nlm.nih.gov/SNP/snp_ref.cgi?rs=2802460	A	G	AAGAGGGAATAATAATTTCACCTACTTGTAGGATTGTCGCTGAGTTTTAAATGAGTGAAGTATATATAGAGTGGCTCAAGGAGTCTGGGCAGATCTCGAAAAGCCTTATATGGCTACACT[A/G]TGGAATTTACACTTTTCCCCATTAAAGAGGTGGTTGATTGAATGCTGTGCAGGCTAGTGATGTGATCATATTTTTCTCCGGAGATTGGACTGGATTGGGTAAGGGTGGAAGAACACTGAG	CTCAGTGTTCTTCCACCCTTACCCAATCCAGTCCAATCTCCGGAGAAAAATATGATCACATCACTAGCCTGCACAGCATTCAATCAACCACCTCTTTAATGGGGAAAAGTGTAAATTCCA[T/C]AGTGTAGCCATATAAGGCTTTTCGAGATCTGCCCAGACTCCTTGAGCCACTCTATATATACTTCACTCATTTAAAACTCAGCGACAATCCTACAAGTAGGTGAAATTATTATTCCCTCTT	T	C	0.765614	0.00792141	0.234386	0.00792141	0.577517	0.0046704	0.376194	0.0046704	0.0462895	0.0046704	1361	2	0.294495	0.376194	0.358899	3.16052	0.0754394	0.0817	786	512	63	0.801886	10	7869043	5002		35	509	intron	C/T	0.320441	0.239871	YES	2	2	2	1	reference
ATP5C1_rs3802595	ATP5C1	http://www.ncbi.nlm.nih.gov/entrez/query.fcgi?db=gene&cmd=Retrieve&dopt=full_report&list_uids=509	rs3802595		http://www.ncbi.nlm.nih.gov/SNP/snp_ref.cgi?rs=3802595	C	G	GTGTCTGCCTAAAACAATAATATCCAAGAGTGACTTGTTATAACCAATAAATTTTGTGTT[C/G]AGGGAGAAAAGTCATTACTACACCAAAAAAGGAAGGTTGACCAAAAACTGGTATTACTTT	AAAGTAATACCAGTTTTTGGTCAACCTTCCTTTTTTGGTGTAGTAATGACTTTTCTCCCT[G/C]AACACAAAATTTATTGGTTATAACAAGTCACTCTTGGATATTATTGTTTTAGGCAGACAC	G	C	0.969163	0.00330028	0.030837	0.00330028	0.93906	0.000718096	0.0602056	0.000718096	0.000734214	0.000718096	1362	2	0.0579858	0.0602056	0.0597722	0.0716115	0.789005	1	1279	82	1	0.906066	10	7874045	-8509		35	509	intron	C/G	0.0189557	0.095491	YES	2	2	2	1	reference
ATP5D_rs1076230	ATP5D	http://www.ncbi.nlm.nih.gov/entrez/query.fcgi?db=gene&cmd=Retrieve&dopt=full_report&list_uids=513	rs1076230		http://www.ncbi.nlm.nih.gov/SNP/snp_ref.cgi?rs=1076230	A	G	ATGAACTGCCCCCAGCCCCCGCCCCATTAAAGACCCGAAGCCTGACTGTGTGCTCGGCTCTTGTTCCTCCACCTGGCCCGGTGAAGCCGGGAGCGTCCTGGGCCCCTGCTCACGTCCTCC[A/G]TGTCCCTTGCAAATAGGGCCTTTGAGCTCCCCTGGACTATGTCCCTTAGGGCACCTGGAGGTCCGTAGGAAGCAGGCTCGAGGGGGTGGGTGGGGTGCAGCCAGGCGGGCAGGCTGCTGA	TCAGCAGCCTGCCCGCCTGGCTGCACCCCACCCACCCCCTCGAGCCTGCTTCCTACGGACCTCCAGGTGCCCTAAGGGACATAGTCCAGGGGAGCTCAAAGGCCCTATTTGCAAGGGACA[C/T]GGAGGACGTGAGCAGGGGCCCAGGACGCTCCCGGCTTCACCGGGCCAGGTGGAGGAACAAGAGCCGAGCACACAGTCAGGCTTCGGGTCTTTAATGGGGCGGGGGCTGGGGGCAGTTCAT	C	T	0.519838	0.00953665	0.480162	0.00953665	0.268185	0.00676552	0.503306	0.00676552	0.228508	0.00676552	1361	2	0.374606	0.503306	0.499213	0.0915122	0.762263	0.7944	365	685	311	0.623271	19	1195900	-6001	15	35	513	locus-region	C/T	0.266966	0.249424	YES	2	2	2	1	reference
ATP5D_rs2301759	ATP5D	http://www.ncbi.nlm.nih.gov/entrez/query.fcgi?db=gene&cmd=Retrieve&dopt=full_report&list_uids=513	rs2301759		http://www.ncbi.nlm.nih.gov/SNP/snp_ref.cgi?rs=2301759	A	G	GCTGCCCTTGGAGTTCACAGCTATCGGAGTGGTGGCCCCACAGCACACAGGAACAGGCAAGGCGCAAGGCATAGGGCCTTGGAGGGACGTAGCAGAGGAGGGGACCCAGGCATGGGCTGG[A/G]AGCCAAGAGCAGAAGCGCCGAGACTGTGAAGCTGGGGAAGGAGTTGAAGGAAACCGGGGTGAATCTCTGGCTGCATGGACAGAGGCCTGGGTACAGGGCACCTGCAAGGGCAGAGGCGGG	CCCGCCTCTGCCCTTGCAGGTGCCCTGTACCCAGGCCTCTGTCCATGCAGCCAGAGATTCACCCCGGTTTCCTTCAACTCCTTCCCCAGCTTCACAGTCTCGGCGCTTCTGCTCTTGGCT[T/C]CCAGCCCATGCCTGGGTCCCCTCCTCTGCTACGTCCCTCCAAGGCCCTATGCCTTGCGCCTTGCCTGTTCCTGTGTGCTGTGGGGCCACCACTCCGATAGCTGTGAACTCCAAGGGCAGC	T	C	0.749449	0.00821684	0.250551	0.00821684	0.557678	0.00501644	0.383542	0.00501644	0.0587803	0.00501644	1361	2	0.305031	0.383542	0.37555	0.616212	0.432459	0.4711	759	522	80	0.859697	19	1189899	6801	15	35	513	locus-region	C/T	0.375	0.216506	YES	2	2	2	1	reference
ATP5D_rs8113509	ATP5D	http://www.ncbi.nlm.nih.gov/entrez/query.fcgi?db=gene&cmd=Retrieve&dopt=full_report&list_uids=513	rs8113509		http://www.ncbi.nlm.nih.gov/SNP/snp_ref.cgi?rs=8113509	A	G	CCCCGGGCCTGTCAGCACGGACGGGCAGCTCACTCCCACGTCATGGCACTATGCGGGTGACTTGCCACAGCTTCACTTGAGGCGAGGTGCCGTTGGGGGCCTTGCGACTCTGAGGCCGCC[A/G]GTCAGCAGATCAGGTATTCTGGAACAGCCCACGGTCCCCTGCCTGGCTCCCCCTCCACTTGGGCCTCGGGACACGAGTGACCAGGCCCCCACTTCTCCAGGAATCCGCAGCCCAGGGAAG	CCCCGGGCCTGTCAGCACGGACGGGCAGCTCACTCCCACGTCATGGCACTATGCGGGTGACTTGCCACAGCTTCACTTGAGGCGAGGTGCCGTTGGGGGCCTTGCGACTCTGAGGCCGCC[G/A]GTCAGCAGATCAGGTATTCTGGAACAGCCCACGGTCCCCTGCCTGGCTCCCCCTCCACTTGGGCCTCGGGACACGAGTGACCAGGCCCCCACTTCTCCAGGAATCCGCAGCCCAGGGAAG	G	A	0.0396476	0.00373361	0.960352	0.00373361	0.00146843	0.001	0.0763583	0.001	0.922173	0.001	1362	2	0.0732518	0.0763583	0.0761513	0.0100641	0.92009	1	2	104	1256	0.923433	19	1196700	145359	15	35	513	locus-region, 3'	A/G	0.0338882	0.125681	YES	1	1	1	1	reference
ATP5E_rs151352	ATP5E	http://www.ncbi.nlm.nih.gov/entrez/query.fcgi?db=gene&cmd=Retrieve&dopt=full_report&list_uids=514	rs151352		http://www.ncbi.nlm.nih.gov/SNP/snp_ref.cgi?rs=151352	A	G	CCTTGGTCTCTCAGAGCAGCAGCATCACCGAAATTTAGAGCTTATCCGATTCCTTCACTTTGCTCACAAGAACGATGTGAACTAAGAGATTAACTGACAGCTTCAAACATCATCCAACTA[A/G]TTAGTGGGATACTCATTAAGTTGGTCTGACTGGGGTCACCTCATCACTGGGCACAGTCATCCTGCCAGCTACCCAGCACTGCTGGAGGCAGGAAGTTTATTATACTACTGGTTTAGGATT	CCTTGGTCTCTCAGAGCAGCAGCATCACCGAAATTTAGAGCTTATCCGATTCCTTCACTTTGCTCACAAGAACGATGTGAACTAAGAGATTAACTGACAGCTTCAAACATCATCCAACTA[A/G]TTAGTGGGATACTCATTAAGTTGGTCTGACTGGGGTCACCTCATCACTGGGCACAGTCATCCTGCCAGCTACCCAGCACTGCTGGAGGCAGGAAGTTTATTATACTACTGGTTTAGGATT	A	G	0.344347	0.00905205	0.655653	0.00905205	0.116006	0.00610225	0.456681	0.00610225	0.427313	0.00610225	1362	2	0.349598	0.456681	0.451544	0.176301	0.674572	0.7289	158	622	582	0.964824	20	57035390	8064		35	514	locus-region	A/G	0.343307	0.231935	YES	2	2	2	1	reference
ATP5E_rs151358	ATP5E	http://www.ncbi.nlm.nih.gov/entrez/query.fcgi?db=gene&cmd=Retrieve&dopt=full_report&list_uids=514	rs151358		http://www.ncbi.nlm.nih.gov/SNP/snp_ref.cgi?rs=151358	A	C	ACTTATCAAAAAAAAAAAAAAAAAAACTACCCAAAATATAGTTGTATTTTTAAAATAACAAATAAATATATAGTCAGTTTGGAGAGACCTGGAGTACCCGATGTTGTCTACCAACTGTCA[A/C]GATCACTTCTCTGCAAACGCTGCTGCTGCCATTGGAGTCCTTATGGTTCCTCTTGCTGAGGCTGTCAGTTCTTCAATCTCAGCATTTAATTTATGTATTACCCATTCCATTGCTTCTCGG	ACTTATCAAAAAAAAAAAAAAAAAAACTACCCAAAATATAGTTGtatttttaaaataacaaataaatatataGTCAGTTTGGAGAGACCTGGAGTACCCGATGTTGTCTACCAACTGTCA[C/A]GATCACTTCTCTGCAAACGCTGCTGCTGCCATTGGAGTCCTTATGGTTCCTCTTGCTGAGGCTGTCAGTTCTTCAATCTCAGCATTTAATTTATGTATTACCCATTCCATTGCTTCTCGG	C	A	0.223568	0.00789659	0.776432	0.00789659	0.0462555	0.00461266	0.354626	0.00461266	0.599119	0.00461266	1362	2	0.286907	0.354626	0.347171	0.62796	0.428105	0.484	63	483	816	0.897233	20	57043454			35	514	intron	A/C	0.256004	0.249928	YES	2	2	2	1	reference
ATP5E_rs6070698	ATP5E	http://www.ncbi.nlm.nih.gov/entrez/query.fcgi?db=gene&cmd=Retrieve&dopt=full_report&list_uids=514	rs6070698		http://www.ncbi.nlm.nih.gov/SNP/snp_ref.cgi?rs=6070698	A	G	TTGGGGGCGGTGGGGAAGAACAAGCATAATGGTAGGGGGAGGCTTGGCCTGAAACTAACCACTGAGTGAATTGCACTGCAGGTTTTACTTAACGGGAATTCCTTATTTGGGATGTCAAGA[A/G]GGCAGCTGCAAACTGAAAAACAATCCAGTAAATGTACTTTGTTTTATGTATTGTAGCAGGCAATTAACTACTAAATAATAGCTTTGACATTTGCAATTGTTGCATAGAGACTATTTTTGC	GCAAAAATAGTCTCTATGCAACAATTGCAAATGTCAAAGCTATTATTTAGTAGTTAATTGCCTGCTACAATACATAAAACAAAGTACATTTACTGGATTGTTTTTCAGTTTGCAGCTGCC[C/T]TCTTGACATCCCAAATAAGGAATTCCCGTTAAGTAAAACCTGCAGTGCAATTCACTCAGTGGTTAGTTTCAGGCCAAGCCTCCCCCTACCATTATGCTTGTTCTTCCCCACCGCCCCCAA	C	T	0.0598385	0.00448852	0.940162	0.00448852	0.00220264	0.00124027	0.115272	0.00124027	0.882526	0.00124027	1362	2	0.106186	0.115272	0.112516	0.817164	0.366011	0.4798	3	157	1202	0.95431	20	57042313	54677864		35	514	mrna-utr	C/T	0.0329319	0.124022	YES	2	2	2	1	reference
ATP5F1_rs10489794	ATP5F1	http://www.ncbi.nlm.nih.gov/entrez/query.fcgi?db=gene&cmd=Retrieve&dopt=full_report&list_uids=515	rs10489794		http://www.ncbi.nlm.nih.gov/SNP/snp_ref.cgi?rs=10489794	A	G	GAGGAAATGAGCTTCAGATCTGGTAAAAGTAATGGCCAAAAAAATAAAGTAGGGCATCGTTAGCATATAGATAGTAAGTCCAGGGAATGGCTGAGGTAAC[A/G]TAGGAAAATTGTATGGAGTAAGAAGAGAGGGCTGTCTCAGCCAGATTGGATGGAGGAAATCAAGCAGGCAAAGGAGACTGGTGAGAAAGGGCCAATTTCA	GAGGAAATGAGCTTCAGATCTGGTAAAAGTAATGGCCAAAAAAATAAAGTAGGGCATCGTTAGCATATAGATAGTAAGTCCAGGGAATGGCTGAGGTAAC[A/G]TAGGAAAATTGTATGGAGTAAGAAGAGAGGGCTGTCTCAGCCAGATTGGATGGAGGAAATCAAGCAGGCAAAGGAGACTGGTGAGAAAGGGCCAATTTCA	A	G	0.7221	0.00879725	0.2779	0.00879725	0.531571	0.00556418	0.381057	0.00556418	0.0873715	0.00556418	1362	2	0.320805	0.381057	0.401343	3.47968	0.0621266	0.0715	724	519	119	0.96465	1	111720177			35	515	locus-region, 3'	A/G	0.242722	0.249894	YES	2	2	2	1	reference
ATP5F1_rs12047479	ATP5F1	http://www.ncbi.nlm.nih.gov/entrez/query.fcgi?db=gene&cmd=Retrieve&dopt=full_report&list_uids=515	rs12047479		http://www.ncbi.nlm.nih.gov/SNP/snp_ref.cgi?rs=12047479	A	C	ACCATACTGCTTCCCAATCCAGTGTTTTGTCTTTGAATCTAATTAAGTCATTACTTTGCCTTCAGCTAATCAAATATAGAAGTACCTTTCTATCTTCCCTCTTTTAGGCATAGCATATCC[A/C]TTCATAAAATAACTCTTTCTTCTTTTAGGACCCTATGTACTCGGAACTGGGCTTATCTTGTACGCTTTATCCAAAGAAATATATGTGATTAGCGCAGAGACCTTCACTGCCCTATCAGTA	ACCATACTGCTTCCCAATCCAGTGTTTTGTCTTTGAATCTAATTAAGTCATTACTTTGCCTTCAGCTAATCAAATATAGAAGTACCTTTCTATCTTCCCTCTTTTAGGCATAGCATATCC[C/A]TTCATAAAATAACTCTTTCTTCTTTTAGGACCCTATGTACTCGGAACTGGGCTTATCTTGTACGCTTTATCCAAAGAAATATATGTGATTAGCGCAGAGACCTTCACTGCCCTATCAGTA	C	A	0.3337	0.00923136	0.6663	0.00923136	0.121145	0.00608458	0.42511	0.00608458	0.453744	0.00608458	1362	2	0.345815	0.42511	0.444689	2.64019	0.104191	0.1165	165	579	618	0.876753	1	111710721	-5455		35	515	intron	A/C	0.447187	0.153678	YES	2	2	2	1	reference
ATP5F1_rs1264897	ATP5F1	http://www.ncbi.nlm.nih.gov/entrez/query.fcgi?db=gene&cmd=Retrieve&dopt=full_report&list_uids=515	rs1264897		http://www.ncbi.nlm.nih.gov/SNP/snp_ref.cgi?rs=1264897	A	G	TTACCGTATTTTGCAAGCTTTAGAACTAAGTTTGGAAGTAAAAAGAGAAATCTCTAGGAAAATGGACATGTCTTATGGAACAATTTTAACGGTAACAGCTGCTAAATTTACTAAGCACAC[A/G]CTATGTACCAAGAACTGTTTTTGAGTTTCACAGCAATTGTCTCTTAATTCTCAAAAGCCACAATGCACTATTATCGCCATTTTATAGATGAGGAAATTGAGGTCACACAGCCAGTAAGTG	TTACCGTATTTTGCAAGCTTTAGAACTAAGTTTGGAAGTAAAAAGAGAAATCTCTAGGAAAATGGACATGTCTTATGGAACAATTTTAACGGTAACAGCTGCTAAatttactaagcacac[A/G]ctatgtaccaagaactgtttttgagtttcacagcaattgtctcttaattctcaaaagccacaatgcactattatcgccattttatagatgaggaaattgaggtcacacagccagtaagtg	A	G	0.419604	0.00957148	0.580396	0.00957148	0.182085	0.0066056	0.475037	0.0066056	0.342878	0.0066056	1362	2	0.368453	0.475037	0.487073	0.831689	0.361785	0.3778	248	647	467	0.842222	1	111705266	-6189		35	515	intron	A/G	0.499432	0.0168445	YES	2	2	2	1	reference
ATP5F1_rs1264901	ATP5F1	http://www.ncbi.nlm.nih.gov/entrez/query.fcgi?db=gene&cmd=Retrieve&dopt=full_report&list_uids=515	rs1264901		http://www.ncbi.nlm.nih.gov/SNP/snp_ref.cgi?rs=1264901	A	G	AGAAATTGGCTCTCTTAATACTATTAGCGCCCAGAACTCCCTCAAAAGTTTTTGTATACTACTTGGAGGTGTGTGTACTCCAGTATGAAGACTGCTATTCTAGAATTATTTAGCCCTCAC[A/G]TCTAGGATGCCTAAACTGGAAATTCCTTTGTTATTCTTACTAAGCCCCTAATTTCTCATTCATTATCTTCACTAATACGTTTTTTTTTTACAAGGCTTTTTAGGTTTTATAAGTCTATAA	AGAAATTGGCTCTCTTAATACTATTAGCGCCCAGAACTCCCTCAAAAGTTTTTGTATACTACTTGGAGGTGTGTGTACTCCAGTATGAAGACTGCTATTCTAGAATTATTTAGCCCTCAC[A/G]TCTAGGATGCCTAAACTGGAAATTCCTTTGTTATTCTTACTAAGCCCCTAATTTCTCATTCATTATCTTCACTAATACGTTTTTTTTTTACAAGGCTTTTTAGGTTTTATAAGTCTATAA	A	G	0.0759912	0.00505409	0.924009	0.00505409	0.0051395	0.00181226	0.141703	0.00181226	0.853157	0.00181226	1362	2	0.130572	0.141703	0.140433	0.111446	0.738504	1	7	193	1162	0.973955	1	111699077	-67373569		35	515	intron	A/G	0.259335	0.249826	YES	2	2	2	1	reference
ATP5G1_rs1800632	ATP5G1	http://www.ncbi.nlm.nih.gov/entrez/query.fcgi?db=gene&cmd=Retrieve&dopt=full_report&list_uids=516	rs1800632		http://www.ncbi.nlm.nih.gov/SNP/snp_ref.cgi?rs=1800632	A	G	ATGTTAATTACCAACGGTAATGAACGATTGACTGCCTCGGCTGGGGCGGGTCGGGGACTGCTGTGTAAGATGGGCAGGATCCTGCGCGACACCTGCCCAGTATCCGCCTCCAGTCTTCCC[A/G]AGAGACCATTCCCTTTCGCAACATTTCCTTCCTGGGGCTTGGGCACATTTCCTTGACTTCCGATCTCCATGACTTTGCTTTGAAGACCCACTGCTCTGTCCCTCTGACCTCTAATGCCCT	ATGTTAATTACCAACGGTAATGAACGATTGACTGCCTCGGCTGGGGCGGGTCGGGGACTGCTGTGTAAGATGGGCAGGATCCTGCGCGACACCTGCCCAGTATCCGCCTCCAGTCTTCCC[G/A]AGAGACCATTCCCTTTCGCAACATTTCCTTCCTGGGGCTTGGGCACATTTCCTTGACTTCCGATCTCCATGACTTTGCTTTGAAGACCCACTGCTCTGTCCCTCTGACCTCTAATGCCCT	G	A	0.26395	0.008415	0.73605	0.008415	0.0682819	0.00524255	0.391336	0.00524255	0.540382	0.00524255	1362	2	0.313071	0.391336	0.388561	0.0694883	0.792083	0.8313	93	533	736	0.930988	17	44325508	4225		35	516	mrna-utr	A/G			YES	2	2	2	1	reference
ATP5G1_rs318095	ATP5G1	http://www.ncbi.nlm.nih.gov/entrez/query.fcgi?db=gene&cmd=Retrieve&dopt=full_report&list_uids=516	rs318095		http://www.ncbi.nlm.nih.gov/SNP/snp_ref.cgi?rs=318095	A	G	CATCCAATTTGAGACAGACCACGTTCCCAGCATCTTTGCATGAGTTCTCTGTCCATGGCTTGCTCCTGCAAGGACTTAGAGAAGCAGCAACTGTTGATATGTCAACTTAGCTAATTTTAC[A/G]TGGGTTATCAGTCCCACTTTAGCCAAGAGGGGCAAGACTGGTGGGCATAGACTTTGAGAACCCAAGGAAGATGCTGGACGAAGCTCTTTATGGAATTCATTATTTGGCACACGCCCCCAA	CATCCAATTTGAGACAGACCACGTTCCCAGCATCTTTGCATGAGTTCTCTGTCCATGGCTTGCTCCTGCAAGGACTTAGAGAAGCAGCAACTGTTGATATGTCAACTTAGCTAATTTTAC[G/A]TGGGTTATCAGTCCCACTTTAGCCAAGAGGGGCAAGACTGGTGGGCATAGACTTTGAGAACCCAAGGAAGATGCTGGACGAAGCTCTTTATGGAATTCATTATTTGGCACACGCCCCCAA	G	A	0.484581	0.00962006	0.515419	0.00962006	0.237151	0.00676748	0.49486	0.00676748	0.267988	0.00676748	1362	2	0.374762	0.49486	0.499525	0.118738	0.730408	0.7423	323	674	365	0.895259	17	44329733			35	516	locus-region, 3'	A/G	0.499963	0.0042723	YES	2	2	2	1	reference
ATP5G2_rs3809156	ATP5G2	http://www.ncbi.nlm.nih.gov/entrez/query.fcgi?db=gene&cmd=Retrieve&dopt=full_report&list_uids=517	rs3809156		http://www.ncbi.nlm.nih.gov/SNP/snp_ref.cgi?rs=3809156	A	G	CTTCTCCCAAATCCGATTAAATGGAGGAGCTCGGGGCCGGGGCGCCGCGGGGCCCGGGAGCCGGGAGGGGGCGGCGGGAAGGACGGGGCCAAGGAGGGGAGGACAAACGGCCCCTCAGAG[A/G]GTGGCGGATTTGCCTTTATTTACAGCCGCGGCTTTCTTTTTATTTTTTATTTTTTATGGGGTTTGGTGAGCTTTTCCCGTCTTTCTCGTGCTGCGTTCAAGCACGATGCAGGGACGGCAG	CTTCTCCCAAATCCGATTAAATGGAGGAGCTcggggccggggcgccgcggggcccgggagccgggagggggcggcgggAAGGACGGGGCCAAGGAGGGGAGGACAAACGGCCCCTCAGAG[G/A]GTGGCGGATTTGCCTTTATTTACAGCCGCGGCTTTCtttttattttttattttttatGGGGTTTGGTGAGCTTTTCCCGTCTTTCTCGTGCTGCGTTCAAGCACGATGCAGGGACGGCAG	G	A	0.470999	0.00981226	0.529001	0.00981226	0.234949	0.00674436	0.4721	0.00674436	0.292952	0.00674436	1362	2	0.374157	0.4721	0.498318	3.77018	0.0521739	0.0566	320	643	399	0.876073	12	52357186	2564		35	517	locus-region, 5'	A/G	0.270125	0.249189	YES	2	2	2	1	reference
ATP5G2_rs6580958	ATP5G2	http://www.ncbi.nlm.nih.gov/entrez/query.fcgi?db=gene&cmd=Retrieve&dopt=full_report&list_uids=517	rs6580958		http://www.ncbi.nlm.nih.gov/SNP/snp_ref.cgi?rs=6580958	A	G	TCATCCAGTGTTAACTTTCCAGGATTTTCTTTCTTTCTGCTAAACAGGCACTTTTCTGCAAGTTAAAGTGGAAACTTTGCACTGCCAATACTTTATACATATTGAGCTTCTCTATTTATT[A/G]GTGATTGTTAATTTCAAGCTCCTGGGCTGTGATGGGCTGGTGGGAACTGACTGATATATTTTCTACTTTTCCTTGCTAAATCAATTCCCTAAGACATCAGGACTGTGAGACATCGGTAAA	tcatccagtgttaactttccaggattttCTTTCTTTCTGCTAAACAGGCACTTTTCTGCAAGTTAAAGTGGAAACTTTGCACTGCCAATACTTTATACATATTGAGCTTCTCTATTTATT[A/G]GTGATTGTTAATTTCAAGCTCCTGGGCTGTGATGGGCTGGTGGGAACTGACTGATATATTTTCTACTTTTCCTTGCTAAATCAATTCCCTAAGACATCAGGACTGTGAGACATCGGTAAA	A	G	0.493387	0.00988348	0.506613	0.00988348	0.259368	0.00676177	0.468038	0.00676177	0.272594	0.00676177	1361	2	0.374956	0.468038	0.499913	5.53289	0.0186622	0.0181	353	637	371	0.971207	12	52359750			35	517	locus-region, 5'	A/G	0.497702	0.0338203	YES	2	2	2	1	reference
ATP5G2_rs7963016	ATP5G2	http://www.ncbi.nlm.nih.gov/entrez/query.fcgi?db=gene&cmd=Retrieve&dopt=full_report&list_uids=517	rs7963016		http://www.ncbi.nlm.nih.gov/SNP/snp_ref.cgi?rs=7963016	A	T	ATTCTGACTGGTTGGCAGCCTCCCTGCCCAGTGGTGACGAAGAAATGAGATTGATCTTTCCTTTCTTAGGATTGGTTAACAACCCTCAGGGGGGCCACAGACTCATTTTAATTGACTGGA[A/T]AGGCTAAGAGAGAGGTTCAGCTTCTCTCATATAGAAATTCCAAGTGTCCTTTTCTACAAAGGTCACCAAGGAAGGGTTTTGATTTGTTTATATATGTTTCTTTGGACAAGAAACCATAGC	ATTCTGACTGGTTGGCAGCCTCCCTGCCCAGTGGTGACGAAGAAATGAGATTGATCTTTCCTTTCTTAGGATTGGTTAACAACCCTCAGGGGGGCCACAGACTCATTTTAATTGACTGGA[T/A]AGGCTAAGAGAGAGGTTCAGCTTCTCTCATATAGAAATTCCAAGTGTCCTTTTCTACAAAGGTCACCAAGGAAGGGTTTTGATTTGTTTATATATGTTTCTTTGGACAAGAAACCATAGC	T	A	0.293686	0.00874997	0.706314	0.00874997	0.0873715	0.00563309	0.412628	0.00563309	0.5	0.00563309	1362	2	0.328811	0.412628	0.414869	0.039719	0.842031	0.8424	119	562	681	0.854994	12	52359086	-1397		35	517	locus-region, 5'	A/T	0.453686	0.144955	YES	2	2	2	1	reference
ATP5G2_rs876252	ATP5G2	http://www.ncbi.nlm.nih.gov/entrez/query.fcgi?db=gene&cmd=Retrieve&dopt=full_report&list_uids=517	rs876252		http://www.ncbi.nlm.nih.gov/SNP/snp_ref.cgi?rs=876252	A	G	ATCCTCCATCTGCATTTTTATGGCCCTGAGCTCCTGAAAGGGAGGGGAAGGAGTGGGGAGAAATAGGAGAAGCGGGCGAGAAGAGGAGGGTGGTAGACTGCCTGTCTTTCCTAAATTCGC[A/G]TTTCCAGCTCCATCAGGATTCTCACAGGTTCCTCTGAAATCCCCAAATCTCCAGTTTTAGTTGTTGATTGCGCCCCGAGCGGGCAGGTACGTGGGAAATGGAACTGGGATCTTTGGGAAT	aTTCCCAAAGATCCCAGTTCCATTTCCCACGTACCTGCCCGCTCGGGGCGCAATCAACAACTAAAACTGGAGATTTGGGGATTTCAGAGGAACCTGTGAGAATCCTGATGGAGCTGGAAA[C/T]GCGAATTTAGGAAAGACAGGCAGTCTACCACCCTCCTCTTCTCGCCCGCTTCTCCTATTTCTCCCCACTCCTTCCCCTCCCTTTCAGGAGCTCAGGGCCATAAAAATGCAGATGGAGGAT	C	T	0.52533	0.00973703	0.47467	0.00973703	0.284875	0.00675365	0.48091	0.00675365	0.234214	0.00675365	1362	2	0.374358	0.48091	0.498717	1.73627	0.187612	0.1887	388	655	319	0.885458	12	52357689	123506195		35	517	locus-region, 5'	C/T	0.426172	0.177379	YES	2	2	2	1	reference
ATP5G3_rs1004723	ATP5G3	http://www.ncbi.nlm.nih.gov/entrez/query.fcgi?db=gene&cmd=Retrieve&dopt=full_report&list_uids=518	rs1004723		http://www.ncbi.nlm.nih.gov/SNP/snp_ref.cgi?rs=1004723	A	G	TATGCACATCTAGTCTGTGCTGTACATACCTTTCTTCTCTTTTCAAGCCCAGATCTGTAAAATTATACCTCTTGTATTTAAAATTATATAAAAAACAAAGTTCATCATTTCCCCAAATCA[A/G]GTTTTTCCTTGTCATTGCTAACAGTCATATTAAAAAAAAAAAATCAGAGCATGGGCTTTAAGGAAGATCTGAATTT	AAATTCAGATCTTCCTTAAAGCCCATGCTCTGATTTTTTTTTTTTAATATGACTGTTAGCAATGACAAGGAAAAAC[C/T]TGATTTGGGGAAATGATGAACTTTGttttttatataattttaaataCAAGAGGTATAATTTTACAGATCTGGGCTTGAAAAGAGAAGAAAGGTATGTACAGCACAGACTAGATGTGCATA	C	T	0.0301028	0.00326422	0.969897	0.00326422	0.000734214	0.000717175	0.0587372	0.000717175	0.940529	0.000717175	1362	2	0.0566883	0.0587372	0.0583932	0.0472482	0.827923	1	1	80	1281	0.975694	2	175863884	9291		35	518	locus-region, 3'	C/T	0.028296	0.115531	YES	1	1	1	1	reference
ATP5G3_rs10497435	ATP5G3	http://www.ncbi.nlm.nih.gov/entrez/query.fcgi?db=gene&cmd=Retrieve&dopt=full_report&list_uids=518	rs10497435		http://www.ncbi.nlm.nih.gov/SNP/snp_ref.cgi?rs=10497435	A	G	TCCCCTGGAGGATCTATTATTGAAGTACAAGGCTTTACTGTTTATTCTACTGTAGACACCACAGGACACCATGTTCTTGGTTAGAATTGAGTACTTGAGA[A/G]ACTATATGAATAATTGCTTGTTGAACAGTACACGTGAATTATCTCTATTTTCCAGCTAAAGATTGAGCCTAAAATGATTAGTATTTTTGTAATTTTGAAT	ATTCAAAATTACAAAAATACTAATCATTTTAGGCTCAATCTTTAGCTGGAAAATAGAGATAATTCACGTGTACTGTTCAACAAGCAATTATTCATATAGT[T/C]TCTCAAGTACTCAATTCTAACCAAGAACATGGTGTCCTGTGGTGTCTACAGTAGAATAAACAGTAAAGCCTTGTACTTCAATAATAGATCCTCCAGGGGA	T	C	0.956314	0.00389554	0.0436858	0.00389554	0.914097	0.0010061	0.0844347	0.0010061	0.00146843	0.0010061	1362	2	0.0800639	0.0844347	0.0835546	0.151089	0.697496	1	1245	115	2	0.918696	2	175873175			35	518	locus-region	C/T	0.0758311	0.179347	YES	2	2	2	1	reference
ATP5G3_rs2288960	ATP5G3	http://www.ncbi.nlm.nih.gov/entrez/query.fcgi?db=gene&cmd=Retrieve&dopt=full_report&list_uids=518	rs2288960		http://www.ncbi.nlm.nih.gov/SNP/snp_ref.cgi?rs=2288960	A	G	CTGTAGTATTGGTGTCATGGGAATGTACGTTATTTCCAAAGTCATTTCATTAAAGATGAAAACTTTAATTTCTTCTGTGATTTGTACTTACACTAAGTTTAGATTATCACAAAGAAGAAC[A/G]TGCATTCAGGCAGATGCTGTCCCATTCAGAGGAAGCTACAGCAGTTGCTCCACTGATGAAAAATATTCCAATGTAATTTTTATGGGAATTCTTTTATATAGTGTTCTGCATATTGTAATT	AATTACAATATGCAGAACACTATATAAAAGAATTCCCATAAAAATTACATTGGAATATTTTTCATCAGTGGAGCAACTGCTGTAGCTTCCTCTGAATGGGACAGCATCTGCCTGAATGCA[C/T]GTTCTTCTTTGTGATAATCTAAACTTAGTGTAAGTACAAATCACAGAAGAAATTAAAGTTTTCATCTTTAATGAAATGACTTTGGAAATAACGTACATTCCCATGACACCAATACTACAG	C	T	0.138767	0.00661906	0.861233	0.00661906	0.0190896	0.00322843	0.239354	0.00322843	0.741557	0.00322843	1362	2	0.210455	0.239354	0.239021	0.00264591	0.958976	1	26	326	1010	0.837678	2	175868326	4043		35	518	locus-region	C/T	0.242451	0.249886	YES	2	2	2	1	reference
ATP5G3_rs268230	ATP5G3	http://www.ncbi.nlm.nih.gov/entrez/query.fcgi?db=gene&cmd=Retrieve&dopt=full_report&list_uids=518	rs268230		http://www.ncbi.nlm.nih.gov/SNP/snp_ref.cgi?rs=268230	A	C	TTCTCTGTAGTAGAAGTTGACTTGCTGGTCATTCTCTTCCTCTGTGAAATAGGACTGTGGCTGGCGGGAGGAAAGAAGGGTCATTCACTACTTAACAGGAAACTAGGGTCCCCAGCAAAG[A/C]GAAGATATTTATTTCAAGGAACCTGGAAAATGGTTCCAGAAGTATGGCTAATCCTTCAGGTGAAAGAGGGCC	TTCTCTGTAGTAGAAGTTGACTTGCTGGTCATTCTCTTCCTCTGTGAAATAGGACTGTGGCTGGCGGGAGGAAAGAAGGGTCATTCACTACTTAACAGGAAACTAGGGTCCCCAGCAAAG[A/C]GAAGATATTTATTTCAAGGAACCTGGAAAATGGTTCCAGAAGTATGGCTAATCCTTCAGGTGAAAGAGGGCC	A	C	0.830029	0.00724613	0.169971	0.00724613	0.690896	0.00390303	0.278267	0.00390303	0.030837	0.00390303	1362	2	0.242354	0.278267	0.282161	0.2594	0.610533	0.6216	941	379	42	0.968954	2	175872369	-105322642		35	518	locus-region	A/C	0.364646	0.222163	YES	2	2	2	1	reference
ATP5H_rs4435292	ATP5H	http://www.ncbi.nlm.nih.gov/entrez/query.fcgi?db=gene&cmd=Retrieve&dopt=full_report&list_uids=10476	rs4435292		http://www.ncbi.nlm.nih.gov/SNP/snp_ref.cgi?rs=4435292	A	G	GAGGGGACTGCTGGTTTCACAGGTGGATACCTATATCAAAACTTATCAAATGGTGTTCTTTAAATATGTGCATTTTATCATATTTCAGATATACCTCAACAAAGCTGTTAGAAACAAGGA[A/G]TTGGAATTAGAAAAATTACCCAAGTAGTATTCAAATACCTAATTATTTGCTTGAAAGCACTGAAGGCCAACTATGGAACTCAGTGGCTCCACCAGAGAGAAGTCTGGCTAGGTGCTCAGG	gaggggaCtgctggtttcacaggtggatacctatatcaaaacttatcaaatggtgttctttaaatatgtgcattttatcatatttcagatatacctcaacaaagctgttAGAAACAAGGA[A/G]TTGGAATTAGAAAAATTACCCAAGTAGTATTCAAATACCTAATTATTTGCTTGAAAGCACTGAAGGCCAACTATGGAACTCAGTGGCTCCACCAGAGAGAAGTCTGGCTAGGTGCTCAGG	A	G	0.308737	0.00888448	0.691263	0.00888448	0.0969163	0.00579753	0.423642	0.00579753	0.479442	0.00579753	1362	2	0.335742	0.423642	0.426837	0.0763287	0.782336	0.7998	132	577	653	0.882985	17	70547388	2953		35	10476	intron	A/G	0.386866	0.209207	YES	2	2	2	1	reference
ATP5H_rs9660	ATP5H	http://www.ncbi.nlm.nih.gov/entrez/query.fcgi?db=gene&cmd=Retrieve&dopt=full_report&list_uids=10476	rs9660		http://www.ncbi.nlm.nih.gov/SNP/snp_ref.cgi?rs=9660	A	G	TCTAAGATTTAAAGGATTCTCTCTAAGAGCTCTTATTTTGTTATTTATCATTTTTCCCAACTGAAAATTCACCTCATAAAAAAGCCTTGTTTTTATTTGACTTATTTTTCAGGATCCCAA[A/G]ATGGCTGGGCGAAAACTTGCTCTAAAAACCATTGACTGGGTAGCTTTTGCAGAGATCATACCCCAGAACCAAAAGGCCATTGCTAGTTCCCTGAAATCCTGGAATGAGACCCTCACCTCC	TCTAAGATTTAAAGGATTCTCTCTAAGAGCTCTTATTTTGTTATTTATCATTTTTCCCAACTGAAAATTCACCTCATAAAAAAGCCTTGTTTTTATTTGACTTATTTTTCAGGATCCCAA[G/A]ATGGCTGGGCGAAAACTTGCTCTAAAAACCATTGACTGGGTAGCTTTTGCAGAGATCATACCCCAGAACCAAAAGGCCATTGCTAGTTCCCTGAAATCCTGGAATGAGACCCTCACCTCC	G	A	0.860499	0.00674898	0.139501	0.00674898	0.744493	0.00347961	0.232012	0.00347961	0.0234949	0.00347961	1362	2	0.211261	0.232012	0.240081	1.53845	0.214849	0.2142	1014	316	32	0.969627	17	70550341			35	10476	mrna-utr	A/G	0.426035	0.177515	YES	2	2	2	1	reference
ATP5I_rs13104878	ATP5I	http://www.ncbi.nlm.nih.gov/entrez/query.fcgi?db=gene&cmd=Retrieve&dopt=full_report&list_uids=521	rs13104878		http://www.ncbi.nlm.nih.gov/SNP/snp_ref.cgi?rs=13104878	A	G	AGTTCTGTCCACCTCCCAGTTCACGTGAGGTGGAAGACAGGGAGGGGGTTTCAAAAGAATCCACATTACCATTCACAGACCCAGAATGCATCATGTAAACACAGTGGGAAGGACAGATGC[A/G]CGCTGCCTGTTCTGTCTGGGGCATCCAGGTGGGGAGCCCCAAAGGCCGTCTGTAATGGAGTCAGTCAGCTGGGGGCCTCATGAGTACTGGGGTTGTCTTGATTCTGAGTTCTAGGCTGCT	AGCAGCCTAGAACTCAGAATCAAGACAACCCCAGTACTCATGAGGCCCCCAGCTGACTGACTCCATTACAGACGGCCTTTGGGGCTCCCCACCTGGATGCCCCAGACAGAACAGGCAGCG[C/T]GCATCTGTCCTTCCCACTGTGTTTACATGATGCATTCTGGGTCTGTGAATGGTAATGTGGATTCTTTTGAAACCCCCTCCCTGTCTTCCACCTCACGTGAACTGGGAGGTGGACAGAACT	C	T	0.027533	0.00317649	0.972467	0.00317649	0.00146843	0.000995834	0.0521292	0.000995834	0.946402	0.000995834	1362	2	0.0521161	0.0521292	0.0535499	0.958687	0.327518	0.2704	2	71	1289	0.635394	4	656057			35	521	locus-region	C/T	0.0236372	0.106112	YES	2	2	2	1	reference
ATP5J2_rs1980307	ATP5J2	http://www.ncbi.nlm.nih.gov/entrez/query.fcgi?db=gene&cmd=Retrieve&dopt=full_report&list_uids=9551	rs1980307		http://www.ncbi.nlm.nih.gov/SNP/snp_ref.cgi?rs=1980307	A	G	ACACACACCCGCTCCTCTGCAGCACTGAAGCTTCCATCTGCAATCACTGGGTCACATAAAGAGACCCAGTAGAGTTCAGAGACAGAGCAGACCCTTGGGTCTAGTGCCATTCTGGGTTTA[A/G]TGCCATTTTGTAGGTGTGTGCCCTTGGCAAGGTACTACTCCTTCTCAGTTTCCTCCTTTGTGAAATCCTTGGTACTTGGCCCTAGGTACTATGTAAATGAGAACTATTACCACCTTTCTG	ACACACACCCGCTCCTCTGCAGCACTGAAGCTTCCATCTGCAATCACTGGGTCACATAAAGAGACCCAGTAGAGTTCAGAGACAGAGCAGACCCTTGGGTCTAGTGCCATTCTGGGTTTA[A/G]tgccattttgtaggtgtgtgcccttggcaaggtactactccttctcagtttcctcctttgtgaaatCCTTGGTACTTGGCCCTAGGTACTATGTAAATGAGAACTATTACCACCTTTCTG	A	G	0.846916	0.00690052	0.153084	0.00690052	0.717327	0.00351605	0.259178	0.00351605	0.0234949	0.00351605	1362	2	0.22568	0.259178	0.259298	0.000294052	0.986319	1	977	353	32	0.917176	7	98705254		6	35	9551	intron	A/G	0.388002	0.20846	YES	3	3	3	1	reference
ATP5J2_rs2293256	ATP5J2	http://www.ncbi.nlm.nih.gov/entrez/query.fcgi?db=gene&cmd=Retrieve&dopt=full_report&list_uids=9551	rs2293256		http://www.ncbi.nlm.nih.gov/SNP/snp_ref.cgi?rs=2293256	A	G	CTGCTTTCAGACAACAAGGCCTTCATTGCCCAAATTAATTCATGGCAAAAAAGAGATCTGAAGACCCAGAGATTTGCTTTCATTTACAGACATCCACAAG[A/G]CTCTGACCTCTTTGAAACGCTCCGAAAATGCCACTAGGACTGAAGTCCCGCATCAAGATCCAGCTTGGCAGCTCCCCCAGTTTGACCTCCAGAAGTTTCT	AGAAACTTCTGGAGGTCAAACTGGGGGAGCTGCCAAGCTGGATCTTGATGCGGGACTTCAGTCCTAGTGGCATTTTCGGAGCGTTTCAAAGAGGTCAGAG[T/C]CTTGTGGATGTCTGTAAATGAAAGCAAATCTCTGGGTCTTCAGATCTCTTTTTTGCCATGAATTAATTTGGGCAATGAAGGCCTTGTTGTCTGAAAGCAG	T	C	0.0359765	0.00353928	0.964023	0.00353928	0.000734214	0.000727147	0.0704846	0.000727147	0.928781	0.000727147	1362	2	0.0669587	0.0704846	0.0693644	0.355211	0.551178	1	1	96	1265	0.849748	7	98702352	-4387	6	35	9551	intron	C/T	0.101894	0.201406	YES	3	3	3	1	reference
ATP5J_rs11909995	ATP5J	http://www.ncbi.nlm.nih.gov/entrez/query.fcgi?db=gene&cmd=Retrieve&dopt=full_report&list_uids=522	rs11909995		http://www.ncbi.nlm.nih.gov/SNP/snp_ref.cgi?rs=11909995	A	G	TTAATCACTATGTTATGTGATCTCCTATACTGCTCTTATTCTAACAGCAAACATTTAGCCGGCAGCTTCTCAGGCACACGTCATGGTCCTAATAAATTCACATGTCAACACTGTCATTCA[A/G]TTCTCTAAAAATCCAGGTAAGTGTAAATATTCTTCACTTATCCCCCACAAGAATGAATCTGTGATTTATAAGACGTACCTTCAAATTTGAAGGTGGGAAATGTATTCATGTCTGCATTAC	ttaatcactatgttatGTGATCTCCTATACTGCTCTTATTCTAACAGCAAACATTTAGCCGGCAGCTTCTCAGGCACACGTCATGGTCCTAATAAATTCACATGTCAACACTGTCATTCA[G/A]TTCTCTAAAAATCCAGGTAAGTGTAAATATTCTTCACTTATCCCCCACAAGAATGAATCTGTGATTTATAAGACGTACCTTCAAATTTGAAGGTGGGAAATGTATTCATGTCTGCATTAC	G	A	0.163363	0.00707677	0.836637	0.00707677	0.0264317	0.0036919	0.273862	0.0036919	0.699706	0.0036919	1362	2	0.23599	0.273862	0.273351	0.00476544	0.944964	1	36	373	953	0.920719	21	26019329	6156		35	522	intron	A/G	0.206111	0.246117	YES	2	2	2	1	reference
ATP5J_rs2829887	ATP5J	http://www.ncbi.nlm.nih.gov/entrez/query.fcgi?db=gene&cmd=Retrieve&dopt=full_report&list_uids=522	rs2829887		http://www.ncbi.nlm.nih.gov/SNP/snp_ref.cgi?rs=2829887	A	G	TGTCTGAAAAAAAAAAAGATTGAGAAATTGTACCAGGCTGTGGTGCATTGTGAGCCTTTTGTCACCGTTCCAATATGGGGTTTGGCAAGCCCTGTCAGTTTATAGACTCGGCCTTAATCT[A/G]AGAAAAATGTATTCTACTAATTATTTATGGTCTCTTTTAATCATTTCCTTTTTTTTCTTTTTGAGACAGAGTCTTGCCCTGCATCCAGGCTGGAGTGCAGTGGTGTGATCTGGGCTCACT	agtgagcccagatcacaccactgcactccagcctggatgcagggcaagactctgtctcaaaaagaaaaaaaaggaaaTGATTAAAAGAGACCATAAATAATTAGTAGAATACATTTTTCT[C/T]AGATTAAGGCCGAGTCTATAAACTGACAGGGCTTGCCAAACCCCATATTGGAACGGTGACAAAAGGCTCACAATGCACCACAGCCTGGTACAATTTCTCAATCtttttttttttcagaca	C	T	0.440162	0.00938455	0.559838	0.00938455	0.187225	0.0066696	0.505874	0.0066696	0.306902	0.0066696	1362	2	0.371394	0.505874	0.492839	0.952773	0.329014	0.3473	255	689	418	0.515162	21	26025485	5872		35	522	mrna-utr	C/T	0.48875	0.0741514	YES	2	2	2	1	reference
ATP5J_rs8133991	ATP5J	http://www.ncbi.nlm.nih.gov/entrez/query.fcgi?db=gene&cmd=Retrieve&dopt=full_report&list_uids=522	rs8133991		http://www.ncbi.nlm.nih.gov/SNP/snp_ref.cgi?rs=8133991	A	G	GTTACACCTATCTGTATTTTAAAAGACACTAGCCGTTCCCAGAATTTTTCGTTAAATTCAAGTTTAGTTTGTATCCCATCTTGTGAAACATTCCGAACCCCAGGTTGGATTTAATCCAGC[A/G]GAACCAGAGTGTCAAAGTATATGAAATTGTTCTGTGCAGTTCTGGCGGGGGCAGCCCTTAGACGGAGAAACTGCAAGTAATTTTCTCTCAGTTTTCCTAAGTATTGACATAGAAGCCTGA	GTTACACCTATCTGTATTTTAAAAGACACTAGCCGTTCCCAGAATTTTTCGTTAAATTCAAGTTTAGTTTGTATCCCATCTTGTGAAACATTCCGAACCCCAGGTTGGATTTAATCCAGC[A/G]GAACCAGAGTGTCAAAGTATATGAAATTGTTCTGTGCAGTTCTGGCGGGGGCAGCCCTTAGACGGAGAAACTGCAAGTAATTTTCTCTCAGTTTTCCTAAGTATTGACATAGAAGCCTGA	A	G	0.853524	0.00658865	0.146476	0.00658865	0.721733	0.00299283	0.263583	0.00299283	0.0146843	0.00299283	1362	2	0.218781	0.263583	0.250041	3.99486	0.0456391	0.055	983	359	20	0.894078	21	26031357			35	522	untranslated	A/G	0.232988	0.24942	YES	2	2	2	1	reference
ATP5O_rs12482697	ATP5O	http://www.ncbi.nlm.nih.gov/entrez/query.fcgi?db=gene&cmd=Retrieve&dopt=full_report&list_uids=539	rs12482697		http://www.ncbi.nlm.nih.gov/SNP/snp_ref.cgi?rs=12482697	A	C	GCCCTGGCCTGACATCACAGTGATTTGCCTACAGGCACCCAGAAATCCAAGAGCAGGCAGGAGGGAGGTGTGGATGCAGTGTTATCAGGCTTCAGGGCTTCTGTGTTTCTCCCTTTGCCC[A/C]CACCACTAAAATACAGGCTAGCTTCAAAATCCCATTCCAGAAACACATCCTGAATGATTCACTTATTCTTTCAACCATAGAGATGGAAAGAGATGGGACTTGGTGCAGGTGCCTGGGTTT	AAACCCAGGCACCTGCACCAAGTCCCATCTCTTTCCATCTCTATGGTTGAAAGAATAAGTGAATCATTCAGGATGTGTTTCTGGAATGGGATTTTGAAGCTAGCCTGTATTTTAGTGGTG[T/G]GGGCAAAGGGAGAAACACAGAAGCCCTGAAGCCTGATAACACTGCATCCACACCTCCCTCCTGCCTGCTCTTGGATTTCTGGGTGCCTGTAGGCAAATCACTGTGATGTCAGGCCAGGGC	T	G	0.906755	0.00555087	0.0932452	0.00555087	0.821586	0.00222442	0.170338	0.00222442	0.00807636	0.00222442	1362	2	0.154804	0.170338	0.169101	0.0728388	0.787248	1	1119	232	11	0.936064	21	34215069			35	539	locus-region, 5'	G/T	0.155128	0.231299	YES	2	2	2	1	reference
ATP5O_rs2040113	ATP5O	http://www.ncbi.nlm.nih.gov/entrez/query.fcgi?db=gene&cmd=Retrieve&dopt=full_report&list_uids=539	rs2040113		http://www.ncbi.nlm.nih.gov/SNP/snp_ref.cgi?rs=2040113	A	G	GATCAAGGTATAGCCACAGGCCACGAACCATTTTCTTGGTAGGTATCACACTGGCCGCCTCCACAGTTGAAACTACTGACTATACAATTAGACATGCTTAGGTCCTAGTATCCTTTAGAC[A/G]ATGCTCCTCACACTTCAATGTGCAAACGATTCACTTAGGGAGCTGGTTAAGATACAGACTCTGATTCAGCAGGTTGCTGTGAGGCCTGAGATTCTTCACTGCCAACAGGCTCCCAGGTGA	GATCAAGGTATAGCCACAGGCCACGAACCATTTTCTTGGTAGGTATCACACTGGCCGCCTCCACAGTTGAAACTACTGACTATACAATTAGACATGCTTAGGTCCTAGTATCCTTTAGAC[A/G]ATGCTCCTCACACTTCAATGTGCAAACGATTCACTTAGGGAGCTGGTTAAGATACAGACtctgattcagcaggttgctgtgaggcctgagattcttcactgccaacaggctcccaggtga	A	G	0.479809	0.00960656	0.520191	0.00960656	0.232012	0.00676304	0.495595	0.00676304	0.272394	0.00676304	1362	2	0.374592	0.495595	0.499185	0.0704416	0.790695	0.7859	316	675	371	0.870199	21	34203053	8063		35	539	intron	A/G	0.496409	0.0422205	YES	2	2	2	1	reference
ATP5O_rs2834301	ATP5O	http://www.ncbi.nlm.nih.gov/entrez/query.fcgi?db=gene&cmd=Retrieve&dopt=full_report&list_uids=539	rs2834301		http://www.ncbi.nlm.nih.gov/SNP/snp_ref.cgi?rs=2834301	A	G	ATATGGGATTCTGGTACCTAGATTCTTGATTCTGGCTAGGGCAGAGTGGCTATCTGAGCATCAGGCCTAAAATAGGAGAACCCGGGTTTGAGCAAATTTGATATTGAAACTGAGAACTGG[A/G]TACTAGCCTTGGATATAGTTTGTCTGCATCCATAAAAACAACCTATCTTCAACCCATTCTCTCTAAATAGAACTTGGTCGAATTTTCTCCTCTGTCAGAGAAGAGACTGGCTGGCAGAGC	ATATGGGATTCTGGTACCTAGATTCTTGATTCTGGCTAGGGCAGAGTGGCTATCTGAGCATCAGGCCTAAAATAGGAGAACCCGGGTTTGAGCAAATTTGATATTGAAACTGAGAACTGG[G/A]TACTAGCCTTGGATATAGTTTGTCTGCATCCATAAAAACAACCTATCTTCAACCCATTCTCTCTAAATAGAACTTGGTCGAATTTTCTCCTCTGTCAGAGAAGAGACTGGCTGGCAGAGC	G	A	0.735316	0.00828496	0.264684	0.00828496	0.53304	0.00515021	0.404552	0.00515021	0.0624082	0.00515021	1362	2	0.313494	0.404552	0.389253	2.104	0.146915	0.1686	726	551	85	0.904994	21	34211116	-17373		35	539	locus-region	A/G	0.446998	0.153921	YES	2	2	2	1	reference
ATP5O_rs3761353	ATP5O	http://www.ncbi.nlm.nih.gov/entrez/query.fcgi?db=gene&cmd=Retrieve&dopt=full_report&list_uids=539	rs3761353		http://www.ncbi.nlm.nih.gov/SNP/snp_ref.cgi?rs=3761353	A	G	TAAAAGAGAGACTATATTGTCTGATATGTAATGTTAATGGAATTCTAAGAATTACTAGACACTATTATAAATTGTAGACTTACGTATTTGTCTAAAGGTTTGATGAAGCAGGGCCAAAAC[A/G]TTGTTTCTTCTTTTTTGTTTGAAAGAAGCTGAGGTTTGTTTTTGCTGTTTGAGTGTTCCTTTGGCAACTTATTATGTGTGAAATGTTAAATTTTACCGATTAAGATGATGGTAACTGAGA	TAAAAGAGAGACTATATTGTCTGATATGTAATGTTAATGGAATTCTAAGAATTACTAGACACTATTATAAATTGTAGACTTACGTATTTGTCTAAAGGTTTGATGAAGCAGGGCCAAAAC[A/G]TTGTTTCTTCTTTTTTGTTTGAAAGAAGCTGAGGTTTGTTTTTGCTGTTTGAGTGTTCCTTTGGCAACTTATTATGTGTGAAATGTTAAATTTTACCGATTAAGATGATGGTAACTGAGA	A	G	0.76909	0.00809731	0.23091	0.00809731	0.592511	0.00483431	0.353157	0.00483431	0.0543319	0.00483431	1362	2	0.292105	0.353157	0.355182	0.044249	0.833391	0.8218	807	481	74	0.953153	21	34193743	19670		35	539	locus-region, 3'	A/G	0.361965	0.223526	YES	2	2	2	1	reference
ATP5O_rs4302292	ATP5O	http://www.ncbi.nlm.nih.gov/entrez/query.fcgi?db=gene&cmd=Retrieve&dopt=full_report&list_uids=539	rs4302292		http://www.ncbi.nlm.nih.gov/SNP/snp_ref.cgi?rs=4302292	A	G	GGTAGTTTGGACCTACTCTGTTTCTGACTTGGCTGGTTCACCTCTCCTTAGGCAACCTTGTGGTCCCCTGCTCCTGGGAGGTCACCATATTGATGCTTAATTTAGTGTGGACACCTGACC[A/G]GCATGGTGCACTACAGCTGAGAGCTCCTGGACTAAAGCAATCCTTCTACCTCAGCCTCCCAAGTAGTTGGGACTACAGGTGCACACCACCATGCCCAGTCATTTTTTTTTTTCATATTTA	ggtagtttggacctactctgtttctgacttggctggttcacctctccttaggcaaccttgtggtcccctgctcctgggaggtcaccatattgatgcttaatttagtgtggacacctgacc[G/A]gcatggtgcactacagctgagagctcctggactaaagcaatccttctacctcagcctcccaagtagttgggactacaggtgcacaccaccatgcccagTCATTTTTTTTTTTCATATTTA	G	A	0.0800294	0.00512778	0.919971	0.00512778	0.00440529	0.00171501	0.151248	0.00171501	0.844347	0.00171501	1362	2	0.136408	0.151248	0.147249	1.00447	0.316232	0.4587	6	206	1150	0.960101	21	34213413	-17033		35	539	locus-region, 5'	A/G	0.096524	0.197345	YES	2	2	2	1	reference
ATP5O_rs762188	ATP5O	http://www.ncbi.nlm.nih.gov/entrez/query.fcgi?db=gene&cmd=Retrieve&dopt=full_report&list_uids=539	rs762188		http://www.ncbi.nlm.nih.gov/SNP/snp_ref.cgi?rs=762188	A	G	CTGGCCCGAAGACCATTCAGCCACCTTTTAGGTGGGCCTAGGGCTACTCAGCTAGAGACCACATTCTTGAGCCTCTGGCAGCACCTGACCTTGGTGCTGAGTTCTGGCAAATGGGAAAGG[A/G]GAGGAAGCGAGGTGTGCCTTCCTGGACTGCCCTCTTGAGCAATCCTTAGTCCATCCCTCTAGCTAGATGCAGACAAGATGGCAAGCGATGCCAAGGGCAGAGCCACCCTGCCAAGCCTTA	TAAGGCTTGGCAGGGTGGCTCTGCCCTTGGCATCGCTTGCCATCTTGTCTGCATCTAGCTAGAGGGATGGACTAAGGATTGCTCAAGAGGGCAGTCCAGGAAGGCACACCTCGCTTCCTC[C/T]CCTTTCCCATTTGCCAGAACTCAGCACCAAGGTCAGGTGCTGCCAGAGGCTCAAGAATGTGGTCTCTAGCTGAGTAGCCCTAGGCCCACCTAAAAGGTGGCTGAATGGTCTTCGGGCCAG	C	T	0.697504	0.00891312	0.302496	0.00891312	0.491924	0.00576924	0.41116	0.00576924	0.0969163	0.00576924	1362	2	0.332949	0.41116	0.421985	0.896196	0.343804	0.3399	670	560	132	0.836324	21	34196380	15666754		35	539	locus-region, 3'	C/T	0.352916	0.227834	YES	2	2	2	1	reference
ATP5S_rs10133342	ATP5S	http://www.ncbi.nlm.nih.gov/entrez/query.fcgi?db=gene&cmd=Retrieve&dopt=full_report&list_uids=27109	rs10133342		http://www.ncbi.nlm.nih.gov/SNP/snp_ref.cgi?rs=10133342	A	T	CATTCTTGTGTTCTTGATAGCATACAGACTTACTCAGAATCAACAGTTGCTGCTTAATTTGTCTATTTTGTAAGCTTAGGCTACTATTTTATTAAAACTGGACATAGATACTTGGCTGAA[A/T]ACAAATAGTTTTGCAGATTGCAATATAATAAAGGAAACAGTAAAAACTAGTGGGCTATGCTTAGGTTTTTCTTGAAACCTAACATTGCTTTAGGCTGGGTGCCGTGGCTCGTGCCTGTAA	CATTCTTGTGTTCTTGATAGCATACAGACTTACTCAGAATCAACAGTTGCTGCTTAATTTGTCTATTTTGTAAGCTTAGGCTACTATTTTATTAAAACTGGACATAGATACTTGGCTGAA[T/A]ACAAATAGTTTTGCAGATTGCAATATAATAAAGGAAACAGTAAAAACTAGTGGGCTATGCTTAGGTTTTTCTTGAAACCTAACATTGCTTTAggctgggtgccgtggctcgtgcctgtaa	T	A	0.140969	0.00664591	0.859031	0.00664591	0.0190896	0.00323575	0.243759	0.00323575	0.737151	0.00323575	1362	2	0.212865	0.243759	0.242194	0.0569031	0.811459	0.916	26	332	1004	0.899402	14	49863134	-5171		35	27109	locus-region, 3'	A/T	0.239342	0.249773	YES	2	2	2	1	reference
ATP5S_rs2275592	ATP5S	http://www.ncbi.nlm.nih.gov/entrez/query.fcgi?db=gene&cmd=Retrieve&dopt=full_report&list_uids=27109	rs2275592		http://www.ncbi.nlm.nih.gov/SNP/snp_ref.cgi?rs=2275592	A	G	ACTTTATTTAGAGTAACTTACTTATTAAACACTGCATTCAACCAGCCCCAGAAGTATCTGGAGTCACATGACCATGGGAGTTTCTTTACGCCACACAACTGCTGGGAAATTTTTCCAAAC[A/G]GCATCATTTGATCTAGACACACAAAACAGTACTTACATTAGATCATCATCCGAGTCCCATACATATAGCAACTTACTTCAGAGTCAATGCTCTTGTACTGATAAAGCTGATGACTCACTT	AAGTGAGTCATCAGCTTTATCAGTACAAGAGCATTGACTCTGAAGTAAGTTGCTATATGTATGGGACTCGGATGATGATCTAATGTAAGTACTGTTTTGTGTGTCTAGATCAAATGATGC[C/T]GTTTGGAAAAATTTCCCAGCAGTTGTGTGGCGTAAAGAAACTCCCATGGTCATGTGACTCCAGATACTTCTGGGGCTGGTTGAATGCAGTGTTTAATAAGTAAGTTACTCTAAATAAAGT	C	T	0.577517	0.00961018	0.422483	0.00961018	0.340926	0.00662054	0.473181	0.00662054	0.185893	0.00662054	1361	2	0.368919	0.473181	0.487982	1.25206	0.263159	0.2605	464	644	253	0.962763	14	49857963	8668		35	27109	coding-nonsynon	C/T	0.488208	0.0758748	YES	2	2	2	1	reference
ATP5S_rs9323183	ATP5S	http://www.ncbi.nlm.nih.gov/entrez/query.fcgi?db=gene&cmd=Retrieve&dopt=full_report&list_uids=27109	rs9323183		http://www.ncbi.nlm.nih.gov/SNP/snp_ref.cgi?rs=9323183	C	G	TCCTTTTTTAAAATCATGTCTCCTAGCTCCTTTAAATGTTTGGAAAACGGTAGTTAAGTTTCTTGGTATCACAGTAGTACTTCTTATTATCCAAAGCTGGAAGGATGCTGCTGCCAGTTA[C/G]CTGGGGTAGGTACTGCAACTAAAAATGCAAAACACAGAATTAGGTTCAAAACTGTGCCATGCATTTTTTTCATTATTTAGAATATATCACAAAAGAGGTAATTAAGCTTTTTAGTATAGA	TCCTTTTTTAAAATCATGTCTCCTAGCTCCTTTAAATGTTTGGAAAACGGTAGTTAAGTTTCTTGGTATCACAGTAGTACTTCTTATTATCCAAAGCTGGAAGGATGCTGCTGCCAGTTA[C/G]CTGGGGTAGGTACTGCAACTAAAAATGCAAAACACAGAATTAGGTTCAAAACTGTGCCATGCATTTTTTTCATTATTTAGAATATATCACAAAAGAGGTAATTAAGCTTTTTAGTATAGA	C	G	0.0657122	0.00472236	0.934288	0.00472236	0.00367107	0.00155201	0.124082	0.00155201	0.872247	0.00155201	1362	2	0.11525	0.124082	0.122788	0.151272	0.697323	1	5	169	1188	0.835188	14	49866631			35	27109	coding-nonsynon	C/G	0.0439339	0.141551	YES	2	2	2	1	reference
ATPAF1_rs2181411	ATPAF1	http://www.ncbi.nlm.nih.gov/entrez/query.fcgi?db=gene&cmd=Retrieve&dopt=full_report&list_uids=64756	rs2181411		http://www.ncbi.nlm.nih.gov/SNP/snp_ref.cgi?rs=2181411	C	G	CATATCTAACTACAGCAGGTCTTCAAGCTTATTATCCTGTCATGAGTTCATAAAGATGACAAACTCATCATTTGGGAGCTATAA[C/G]GTCAAAGTGGCCAGAATGCAACTGCGCTGTTACACTGTGCAAAATCAAGTCAACTGTCTTGTAGGTCCTTGGCTGTCTCTTGTTATAACCTCGAACACTTAAAAAAGGAAACCTCAAGTA	TACTTGAGGTTTCCTTTTTTAAGTGTTCGAGGTTATAACAAGAGACAGCCAAGGACCTACAAGACAGTTGACTTGATTTTGCACAGTGTAACAGCGCAGTTGCATTCTGGCCACTTTGAC[C/G]TTATAGCTCCCAAATGATGAGTTTGTCATCTTTATGAACTCATGACAGGATAATAAGCTTGAAGACCTGCTGTAGTTAGATATG	C	G	0.0201909	0.002667	0.979809	0.002667			0.0403818	0.000107698	0.959618	0.000107698	1362	2	0.0387837	0.0403818	0.0395664	0.578369	0.446952	1	0	55	1307	0.676444	1	46813137	18231		35	64756	mrna-utr	C/G	0.00961509	0.0686664	YES	2	2	2	1	reference
ATPAF1_rs604264	ATPAF1	http://www.ncbi.nlm.nih.gov/entrez/query.fcgi?db=gene&cmd=Retrieve&dopt=full_report&list_uids=64756	rs604264		http://www.ncbi.nlm.nih.gov/SNP/snp_ref.cgi?rs=604264	A	G	AGTGAAAGTGTTACAACATGAAAGTCAGTTCTCTAACCTTAGCAGGCAGTTGCCTTTACTTTTCCTATGTTTATTGCCTCTTGAGAAGCTGCATTTTACAGCCCTGAGAGTTTTTATTAT[A/G]CCCTGAGCACCAGAGATTGGAAGCTCCATATGGTATATTTATGGCTCTTGTTTTCCTCCTTTCTACTTTAGAAATGTCTCTGAGTCAAGTCTCTGACAAGGGAGCGTGGTATAAGTTCAT	AGTGAAAGTGTTACAACATGAAAGTCAGTTCTCTAACCTTAGCAGGCAGTTGCCTTTACTTTTCCTATGTTTATTGCCTCTTGAGAAGCTGCATTTTACAGCCCTGAGAGTTTTTATTAT[A/G]CCCTGAGCACCAGAGATTGGAAGCTCCATATGGTATATTTATGGCTCTTGTTTTCCTCCTTTCTACTTTAGAAATGTCTCTGAGTCAAGTCTCTGACAAGGGAGCGTGGTATAAGTTCAT	A	G	0.00477239	0.00131729	0.995228	0.00131729			0.00954479	1.25733e-05	0.990455	1.25733e-05	1362	2	0.00945412	0.00954479	0.00949924	0.0313188	0.859531	1	0	13	1349	0.823422	1	46831368			35	64756	intron	A/G	0.0165278	0.0893907	YES	2	2	2	1	reference
ATPAF1_rs620431	ATPAF1	http://www.ncbi.nlm.nih.gov/entrez/query.fcgi?db=gene&cmd=Retrieve&dopt=full_report&list_uids=64756	rs620431		http://www.ncbi.nlm.nih.gov/SNP/snp_ref.cgi?rs=620431	A	C	CTACAGGCCAGAAAAGTTTTATTTGATCTGGAACCGGGCTCAGTCCTGTCCAACAGTAAGTTTTCTGGTGATCACCGTAAGGGTTGCTTATCAATGTTGCCAAACAAGTTTTTTCCAGCC[A/C]ATCACGTCATATTCCATACTGTCTCACATGTTATAGTGCTCTGTTTACTTAATAAAGATGCTCACATGTTGATTGTACTAATAAGTTATAGTGCTCTGTTTACTTAATAAAGATGCTCAC	CTACAGGCCAGAAAAGTTTTATTTGATCTGGAACCGGGCTCAGTCCTGTCCAACAGTAAGTTTTCTGGTGATCACCGTAAGGGTTGCTTATCAATGTTGCCAAACAAGTTTTTTCCAGCC[A/C]ATCACGTCATATTCCATACTGTCTCACATGTTATAGTGCTCTGTTTACTTAATAAAGATGCTCACATGTTGATTGTACTAATAAGTTATAGTGCTCTGTTTACTTAATAAAGATGCTCAC	A	C	0.275165	0.00854341	0.724835	0.00854341	0.0749449	0.0053957	0.400441	0.0053957	0.524614	0.0053957	1361	2	0.319339	0.400441	0.398899	0.0203408	0.886589	0.9437	102	545	714	0.942835	1	46830209	-10799		35	64756	intron	A/C	0.313272	0.241861	YES	2	2	2	1	reference
ATPAF1_rs744096	ATPAF1	http://www.ncbi.nlm.nih.gov/entrez/query.fcgi?db=gene&cmd=Retrieve&dopt=full_report&list_uids=64756	rs744096		http://www.ncbi.nlm.nih.gov/SNP/snp_ref.cgi?rs=744096	A	G	ATAAGGCCCCCAGTGACTTCCATGTTTGTGAAATCAGTAAATTCTCAGTCCTAATCTCATTTGCCCTAATAAACAAGGGAGATTTGGTGAGTTGAGCAGTCCCTATTCCTTGAAACATTC[A/G]ATTTTAGCTTCCAGGGCATTCTACCATCTTAATTTTCCTTTTACCTCATGGCCATTCCTTCTTAATCTTTGCTGATGCTTCTTCATCTCTCCAGGGATGGAGACCCCTCGCTCAGTTCTT	aagaactgagcgaggggtctccatccctggagagatgaagaagcatcagcaaagattaagaaggaatggccatgaggtaaaaggaaaattaagatggtagaatgccctggaagctaaaat[C/T]gaatgtttcaaggaatagggactgctcaactcaccaaatctcccttgtttattagggcaaatgagattaggactgagaatttactgatttcacaaacatggaagtcactgggggccttat	C	T	0.730176	0.00851783	0.269824	0.00851783	0.533774	0.00534745	0.392805	0.00534745	0.0734214	0.00534745	1362	2	0.316405	0.392805	0.394038	0.0133387	0.908054	0.8908	727	535	100	0.927667	1	46819410	-28945867		35	64756	intron	C/T	0.366528	0.221182	YES	2	2	2	1	reference
ATPAF2_rs2955377	ATPAF2	http://www.ncbi.nlm.nih.gov/entrez/query.fcgi?db=gene&cmd=Retrieve&dopt=full_report&list_uids=91647	rs2955377		http://www.ncbi.nlm.nih.gov/SNP/snp_ref.cgi?rs=2955377	A	G	CACATTTTGGAAGCTATAAGCTATAACTCAGTCTCTCACATCTGTGACAAACACAAAACTTTCATTCATTCATTCGTTTGTTCACTCGTTCATGTGTTCACTGAGTTCTCAAAGTCTTTG[A/G]AGACCCTAACTGAAGTTATTTATTGGAAATAATGATGCAGCATGTGGAAGAAAAAAGAGTAAATCATTTGCTTTATTTATTTATTTTATTATTATTTTTTTTTTGAAATGGCGTCTCACT	agtgagacgccatttcaaaaaaaaaataataataaaataaataaaTAAAGCAAATGATTTACTCTTTTTTCTTCCACATGCTGCATCATTATTTCCAATAAATAACTTCAGTTAGGGTCT[T/C]CAAAGACTTTGAGAACTCAGTGAACACatgaacgagtgaacaaacgaatgaatgaatgaaAGTTTTGTGTTTGTCACAGATGTGAGAGACTGAGTTATAGCTTATAGCTTCCAAAATGTG	T	C	0.317548	0.0089143	0.682452	0.0089143	0.100587	0.00587001	0.433921	0.00587001	0.465492	0.00587001	1362	2	0.339495	0.433921	0.433422	0.00180078	0.966151	1	137	591	634	0.884225	17	17873543			35	91647	intron	C/T	0.497756	0.0334178	YES	2	2	2	1	reference
ATPIF1_rs526050	ATPIF1	http://www.ncbi.nlm.nih.gov/entrez/query.fcgi?db=gene&cmd=Retrieve&dopt=full_report&list_uids=93974	rs526050		http://www.ncbi.nlm.nih.gov/SNP/snp_ref.cgi?rs=526050	A	G	TAATTCATAATATGAATGTGACTTTAGAATTTAGAAATAAATGGTTCTTGTATGGAACTTGTTAACATTTGAGAACACAGCATTCCACAGAATACAGTTTGGGAAATACTTCACTTGTAT[A/G]ATATATTTATTGCCTTAGTCAAAATTCTTTTTGTCCTCCGCCTCCCACTGCTTCACTTGACTAGCCTAAAAAAATAAAAAATAAAATCCTTTTTGTTTACATGTAACAGAAACCAGCACT	agtgctggtttctgttacatgtaaacaaaaaGGattttattttttatttttttaGGCTAGTCAAGTGAAGCAGTGGGAGGCGGAGGACAAAAAGAATTTTGACTAAGGCAATAAATATAT[C/T]ATACAAGTGAAGTATTTCCCAAACTGTATTCTGTGGAATGCTGTGTTCTCAAATGTTAACAAGTTCCATACAAGAACCATTTATTTCTAAATTCTAAAGTCACATTCATATTATGAATTA	C	T	0.707783	0.00855281	0.292217	0.00855281	0.493392	0.00551421	0.428781	0.00551421	0.0778267	0.00551421	1362	2	0.328098	0.428781	0.413653	1.82178	0.177101	0.1871	672	584	106	0.935137	1	28251643			35	93974	locus-region, 3'	C/T	0.38623	0.209622	YES	2	2	2	1	reference
ATPIF1_rs8559	ATPIF1	http://www.ncbi.nlm.nih.gov/entrez/query.fcgi?db=gene&cmd=Retrieve&dopt=full_report&list_uids=93974	rs8559		http://www.ncbi.nlm.nih.gov/SNP/snp_ref.cgi?rs=8559	A	G	ATCTGAAAGCAATAAGCTCTTTGGTCTTCTTAAGATGGCTACACCTCAATTTAAGATGGGGTATTCTTTCACTAGTTGAGGAGTAGAAGAGGATGACCAGCTAGACTCCCATGGAATTGG[A/G]ACTCCTATTCCTTGCTTAGACATTACGGGTTATGCTTTGAGATCTCTTTGGGGTGAAGGATTGAAATTAAACCCTGAGCCACCGTGTCCTTGTAGAGCACAGAGTAGAGAACAACTGGCA	TGCCAGTTGTTCTCTACTCTGTGCTCTACAAGGACACGGTGGCTCAGGGTTTAATTTCAATCCTTCACCCCAAAGAGATCTCAAAGCATAACCCGTAATGTCTAAGCAAGGAATAGGAGT[C/T]CCAATTCCATGGGAGTCTAGCTGGTCATCCTCTTCTACTCCTCAACTAGTGAAAGAATACCCCATCTTAAATTGAGGTGTAGCCATCTTAAGAAGACCAAAGAGCTTATTGCTTTCAGAT	C	T	0.651615	0.0089905	0.348385	0.0089905	0.417768	0.0061108	0.467695	0.0061108	0.114537	0.0061108	1362	2	0.350956	0.467695	0.454026	1.23449	0.266536	0.2784	569	637	156	0.895503	1	28248394	26993893		35	93974	intron	C/T	0.460676	0.134594	YES	2	2	2	1	reference
BDKRB1_rs12431885	BDKRB1	http://www.ncbi.nlm.nih.gov/entrez/query.fcgi?db=gene&cmd=Retrieve&dopt=full_report&list_uids=623	rs12431885		http://www.ncbi.nlm.nih.gov/SNP/snp_ref.cgi?rs=12431885	A	G	GCCCGCTTTTATGCTGTTCTGTTTGGCCTGGTCTTTCCTTCATCCCAGTAAGGTTGGATCTGGGCACTTTTCCCTATAGACTGCTTGTACTCCTTGCAGAGGGCACCTCCTATGTGCCGG[A/G]TGATAAATAGCAATAAGTAAGACGGGGTCCTTGCCTCGTGGTGTTCTCAGACCACCAAGAACAGTTCCGGGGTGTGTTAGAAAACAGGCATGCAAGAGGTGCGGACAAGACCAGGGGCTT	GCCCGCTTTTATGCTGTTCTGTTTGGCCTGGTCTTTCCTTCATCCCAGTAAGGTTGGATCTGGGCACTTTTCCCTATAGACTGCTTGTACTCCTTGCAGAGGGCACCTCCTATGTGCCGG[G/A]TGATAAATAGCAATAAGTAAGACGGGGTCCTTGCCTCGTGGTGTTCTCAGACCACCAAGAACAGTTCCGGGGTGTGTTAGAAAACAGGCATGCAAGAGGTGCGGACAAGACCAGGGGCTT	G	A	0.0440089	0.0043527	0.955991	0.0043527	0.0110947	0.00262314	0.0658284	0.00262314	0.923077	0.00262314	1352	2	0.0806041	0.0658284	0.0841442	64.0589	1.20754e-15	0	15	89	1248	0.654942	14	95738029	48456	5	35	623	locus-region, 5'	A/C/G	0.0487499	0.148319	YES	2	2	2	1	reference
BDKRB1_rs2069613	BDKRB1	http://www.ncbi.nlm.nih.gov/entrez/query.fcgi?db=gene&cmd=Retrieve&dopt=full_report&list_uids=623	rs2069613		http://www.ncbi.nlm.nih.gov/SNP/snp_ref.cgi?rs=2069613	A	G	GCCATGTGTACAGCAAAGAATGGGGGTATGGAATAAGATGTTTTCCTTAG[A/G]AACCAGTAGTTCCTTTATGATGTTTTAAAGAGATGGAATTGGATTACCGT	ACGGTAATCCAATTCCATCTCTTTAAAACATCATAAAGGAACTACTGGTT[C/T]CTAAGGAAAACATCTTATTCCATACCCCCATTCTTTGCTGTACACATGGC	C	T	0.794053	0.0077348	0.205947	0.0077348	0.629956	0.00441493	0.328194	0.00441493	0.0418502	0.00441493	1362	2	0.27358	0.328194	0.327066	0.0162005	0.898718	0.9313	858	447	57	0.934069	14	95786485	13410	5	35	623	locus-region, 5'	C/T	0.292078	0.246433	YES	2	2	2	1	reference
BDKRB1_rs2071084	BDKRB1	http://www.ncbi.nlm.nih.gov/entrez/query.fcgi?db=gene&cmd=Retrieve&dopt=full_report&list_uids=623	rs2071084		http://www.ncbi.nlm.nih.gov/SNP/snp_ref.cgi?rs=2071084	A	G	GGCATCATCCTGGCCCCCTCTAGAGCTCCAATCCTCCAACCAGAGCCAGCTCTTCCCTCAAAATGCTACGGCCTGTGACAATGCTCCAGAAGCCTGGGACCTGCTGCACAGAGTGCTGCC[A/G]ACATTTATCATCTCCATCTGTTTCTTCGGCCTCCTAGGGAACCTTTTTGTCCTGTTGGTCTTCCTCCTGCCCCGGCGGCAACTGAACGTGGCAGAAATCTACCTGGCCAACCTGGCAGCC	GGCATCATCCTGGCCCCCTCTAGAGCTCCAATCCTCCAACCAGAGCCAGCTCTTCCCTCAAAATGCTACGGCCTGTGACAATGCTCCAGAAGCCTGGGACCTGCTGCACAGAGTGCTGCC[A/G]ACATTTATCATCTCCATCTGTTTCTTCGGCCTCCTAGGGAACCTTTTTGTCCTGTTGGTCTTCCTCCTGCCCCGGCGGCAACTGAACGTGGCAGAAATCTACCTGGCCAACCTGGCAGCC	A	G	0.144273	0.00682465	0.855727	0.00682465	0.0242291	0.00352863	0.240088	0.00352863	0.735683	0.00352863	1362	2	0.216433	0.240088	0.246917	1.04172	0.307423	0.326	33	327	1002	0.72709	14	95799895	-8292	5	35	623	coding-synon	A/G	0.261787	0.249722	YES	2	2	2	1	reference
BDKRB1_rs4905475	BDKRB1	http://www.ncbi.nlm.nih.gov/entrez/query.fcgi?db=gene&cmd=Retrieve&dopt=full_report&list_uids=623	rs4905475		http://www.ncbi.nlm.nih.gov/SNP/snp_ref.cgi?rs=4905475	C	G	AAAGGCAAGATTCTAAAGACAGAGGTGACACCTTCTGCTCCAAACATTTGGAGGGTCACCTTTCCAGAAGTCAGACTCGAAGTCCTGAATTCTGGCATGAATGAGTTCTCCTACGTGTAG[C/G]GGGTGGCCTGGAAAGATCTTAATTTGTAAGTTGACAGGTAAGGGGCCTTCAGTTGGAGAATCTTGTCACCTGATTCTCAAAGCCAAAAATATCTTACTGTCTGAAACATGAGGTCTTGAG	AAAGGCAAGATTCTAAAGACAGAGGTGACACCTTCTGCTCCAAACATTTGGAGGGTCACCTTTCCAGAAGTCAGACTCGAAGTCCTGAATTCTGGCATGAATGAGTTCTCCTACGTGTAG[G/C]GGGTGGCCTGGAAAGATCTTAATTTGTAAGTTGACAGGTAAGGGGCCTTCAGTTGGAGAATCTTGTCACCTGATTCTCAAAGCCAAAAATATCTTACTGTCTGAAACATGAGGTCTTGAG	G	C	0.0917768	0.00559295	0.908223	0.00559295	0.010279	0.00245093	0.162996	0.00245093	0.826725	0.00245093	1362	2	0.152812	0.162996	0.166708	0.675292	0.411213	0.4114	14	222	1126	0.965135	14	95791603	12467	5	35	623	locus-region	C/G	0.0736247	0.177177	YES	2	2	2	1	reference
BDKRB1_rs4905476	BDKRB1	http://www.ncbi.nlm.nih.gov/entrez/query.fcgi?db=gene&cmd=Retrieve&dopt=full_report&list_uids=623	rs4905476		http://www.ncbi.nlm.nih.gov/SNP/snp_ref.cgi?rs=4905476	A	C	GGAACATCCCTGGGCCCTTGGAGTTGACCTTCCAGGGTCCCCCCGGGGCTCCAATTCTTTGGTGCTGTGTAGCAGAGGCCCCGTGAACAGGGCGCCCTCCCATCAGGTTCACACGCATGG[A/C]AGCTATGGGAGGTTAAGTTTGCAACCCCTCATCCAGACCATCCCTTCACATACAGTCTAGGAAACAGAGAGCAGTAAGACCTGCCCAAGCACACCCAGTGCGACTCAGCAGCCACACACA	ggaacatccctgggcccttggagttgaccttccagGGTCCCCCCGGGGCTCCAATTCTTTGGTGCTGTGTAGCAGAGGCCCCGTGAACAGGGCGCCCTCCCATCAGGTTCACACGCATGG[A/C]AGCTATGGGAGGTTAAGTTTGCAACCCCTCATCCAGACCATCCCTTCACATACAGTCTAGGAAACAGAGAGCAGTAAGACCTGCCCAAGCACACCCAGTGCGACTCAGCAGCCACACACA	A	C	0.484214	0.00932801	0.515786	0.00932801	0.221733	0.00675786	0.524963	0.00675786	0.253304	0.00675786	1362	2	0.374751	0.524963	0.499502	3.53897	0.0599427	0.0608	302	715	345	0.894294	14	95804070		5	35	623	locus-region, 3'	A/C	0.487535	0.0779571	YES	2	2	2	1	reference
BDKRB2_rs1046248	BDKRB2	http://www.ncbi.nlm.nih.gov/entrez/query.fcgi?db=gene&cmd=Retrieve&dopt=full_report&list_uids=624	rs1046248		http://www.ncbi.nlm.nih.gov/SNP/snp_ref.cgi?rs=1046248	A	G	CCACCTCCCCTAAGTAGTGAACTGAGGAATCCCTTTGACTCACCTGAAAGAGGCCGTGGTGGGCACGGAGTCCTCAC[A/G]AACAGACAGAAACATTGATATCTTCCAGGGAGAGAACATTTGGACTCAGAGTGGGATGTGAGTGAGGCCACACCTGGGCTGAACAGAGAAGAAAAGATGGTTAGATGGCACAGGGGCTGG	CCAGCCCCTGTGCCATCTAACCATCTTTTCTTCTCTGTTCAGCCCAGGTGTGGCCTCACTCACATCCCACTCTGAGTCCAAATGTTCTCTCCCTGGAAGATATCAATGTTTCTGTCTGTT[C/T]GTGAGGACTCCGTGCCCACCACGGCCTCTTTCAGGTGAGTCAAAGGGATTCCTCAGTTCACTACTTAGGGGAGGTGG	C	T	0.101689	0.00578895	0.898311	0.00578895	0.010279	0.0024694	0.182819	0.0024694	0.806902	0.0024694	1362	2	0.166007	0.182819	0.182696	0.00061913	0.980149	1	14	249	1099	0.900948	14	95773237	-35603	5	35	624	coding-nonsynon	C/T	0.171671	0.237412	YES	2	2	2	1	reference
BDKRB2_rs11629183	BDKRB2	http://www.ncbi.nlm.nih.gov/entrez/query.fcgi?db=gene&cmd=Retrieve&dopt=full_report&list_uids=624	rs11629183		http://www.ncbi.nlm.nih.gov/SNP/snp_ref.cgi?rs=11629183	A	C	CCAGAATGCCACAGTGCTGACCAGAAAGGCACTCCCTGGTCCTCTGTGAATCAGCAGCCGCCCTGCAAAAGGCTGACCAGTTACACACAGGTCAGACAGACCAGCAGGGAAACTGGAAAG[A/C]AGGGTCAGAGGATAAGTGCTGATTTGGGTTCATGGCAAAACCCATGCAGAGCCTGTAGTTTTGCCTGATTGGCACTAACACTCACAGCTAAGAACTCTAGAGAGCCTCTGCGTCCCCAAT	ATTGGGGACGCAGAGGCTCTCTAGAGTTCTTAGCTGTGAGTGTTAGTGCCAATCAGGCAAAACTACAGGCTCTGCATGGGTTTTGCCATGAACCCAAATCAGCACTTATCCTCTGACCCT[G/T]CTTTCCAGTTTCCCTGCTGGTCTGTCTGACCTGTGTGTAACTGGTCAGCCTTTTGCAGGGCGGCTGCTGATTCACAGAGGACCAGGGAGTGCCTTTCTGGTCAGCACTGTGGCATTCTGG	G	T	0.0848018	0.00536808	0.915198	0.00536808	0.00807636	0.0022068	0.153451	0.0022068	0.838473	0.0022068	1362	2	0.143174	0.153451	0.155221	0.17711	0.673869	0.5979	11	209	1142	0.857406	14	95737634	18415	5	35	624	locus-region, 5'	G/T	0.095	0.19615	YES	2	2	2	1	reference
BDKRB2_rs11847625	BDKRB2	http://www.ncbi.nlm.nih.gov/entrez/query.fcgi?db=gene&cmd=Retrieve&dopt=full_report&list_uids=624	rs11847625		http://www.ncbi.nlm.nih.gov/SNP/snp_ref.cgi?rs=11847625	C	G	AGAGAAGGTGACATCAAGCAGGTTCTGAAGGATGAGTAGGAGTTGGAAGGAGTTGGAAGAGCTCCTGCCCTTTGTGGAGCAGGAGAGGGAGGTGGTCCAGGGACCTTTCTGGCCGACCAA[C/G]CCTAGAGCCAATTGCAGTGAGCCATTGTGACATTGGACTTGAAACTGGTCACTGCGAGAGTATTTATACCATAGAAATTTGCAAATGCTACGGTTAGGGCATTTTTTTCCAGAAAGCCCG	agagaaggtgacatcaagcaggttctgaaggatgagtaggagttggaaggagttggaagagcTCCTGCCCTTTGTGGAGCAGGAGAGGGAGGTGGTCCAGGGACCTTTCTGGCCGACCAA[G/C]CCTAGAGCCAATTGCAGTGAGCCATTgtgacattggacttgaaactggtcactgcgagagtatttataccatagaaatttgcaaatgctacggttagggcatttttttccagaaagcccg	G	C	0.362335	0.00927083	0.637665	0.00927083	0.134361	0.00627367	0.455947	0.00627367	0.409692	0.00627367	1362	2	0.35533	0.455947	0.462097	0.241204	0.623338	0.6358	183	621	558	0.8297	14	95756049	16291	5	35	624	mrna-utr	C/G	0.444444	0.157135	YES	2	2	2	1	reference
BDKRB2_rs2069575	BDKRB2	http://www.ncbi.nlm.nih.gov/entrez/query.fcgi?db=gene&cmd=Retrieve&dopt=full_report&list_uids=624	rs2069575		http://www.ncbi.nlm.nih.gov/SNP/snp_ref.cgi?rs=2069575	A	G	ACTAGGGGCACAGAGGAGGCCCTGGGCTGAGAACTTGACAGCACCTTGTATTGGTAACCAGCCGGAGGGACTGGAAATACTCAGATGTGTCTGTCTCCCTTATTAGGTTCAAAGTCCCTC[A/G]AGACCCTGTCTCCATCACAGTGCTCCAGTCCAGACCCCTCCTCTGAGCTCCAGACCCTGCTGGACCCAACAGCCATCCCCATCCCCACCTGCCTGGAATTCTCCAAAGAACCTCCCCTTT	ACTAGGGGCACAGAGGAGGCCCTGGGCTGAGAACTTGACAGCACCTTGTATTGGTAACCAGCCGGAGGGACTGGAAATACTCAGATGTGTCTGTCTCCCTTATTAGGTTCAAAGTCCCTC[G/A]AGACCCTGTCTCCATCACAGTGCTCCAGTCCAGACCCCTCCTCTGAGCTCCAGACCCTGCTGGACCCAACAGCCATCCCCATCCCCACCTGCCTGGAATTCTCCAAAGAACCTCCCCTTT	G	A	0.23605	0.00810501	0.76395	0.00810501	0.0543319	0.00485701	0.363436	0.00485701	0.582232	0.00485701	1362	2	0.295623	0.363436	0.360661	0.0806552	0.776411	0.8217	74	495	793	0.821902	14	95772340	2429	5	35	624	mrna-utr	A/G	0.296593	0.24562	YES	2	2	2	1	reference
BDKRB2_rs2069579	BDKRB2	http://www.ncbi.nlm.nih.gov/entrez/query.fcgi?db=gene&cmd=Retrieve&dopt=full_report&list_uids=624	rs2069579		http://www.ncbi.nlm.nih.gov/SNP/snp_ref.cgi?rs=2069579	A	C	TCCCTCACTCAACCTCTTGCTACTTCCCACCTCTCCTGTCCAACATCTAGTGTCACTTTCCAGAACATACCAACAGCTTCCCCAGTTCTGTGCCTCTGCT[A/C]AGGCTGTTCCCCCTGCCTGGTCCACTTGTCCTCCTTCTTGTCCCGTCAAAATGCTTCTTATCCTTCAAGACCCAGCTCTAGAGTCACCTCCAACCCCTTA	TCCCTCACTCAACCTCTTGCTACTTCCCACCTCTCCTGTCCAACATCTAGTGTCACTTTCCAGAACATACCAACAGCTTCCCCAGTTCTGTGCCTCTGCT[C/A]AGGCTGTTCCCCCTGCCTGGTCCACTTGTCCTCCTTCTTGTCCCGTCAAAATGCTTCTTATCCTTCAAGACCCAGCTCTAGAGTCACCTCCAACCCCTTA	C	A	0.028288	0.0040016	0.971712	0.0040016	0.0168993	0.00330046	0.0227774	0.00330046	0.960323	0.00330046	1361	2	0.0534645	0.0227774	0.0549756	466.855	1.549e-103	0	23	31	1307	0.336753	14	95774769	4214	5	35	624	intron	A/C	0.062435	0.165286	YES	2	2	2	1	reference
BDKRB2_rs3809418	BDKRB2	http://www.ncbi.nlm.nih.gov/entrez/query.fcgi?db=gene&cmd=Retrieve&dopt=full_report&list_uids=624	rs3809418		http://www.ncbi.nlm.nih.gov/SNP/snp_ref.cgi?rs=3809418	A	G	GAGAGTGCAGGCCTGCTCAGGGACTGTTCCTGTCTCAGCAACCAAGGGATTGTTCCTGTCAATCAATGGTTTATTGGAAGGTGGCCCAGTATGAGCCCTAGAAGAGTGTGAAAAGGAATG[A/G]CAATGGTGTTCACCATCGGCAGTGCCAGGGCAGCACTCATTCACTTGATAAATGAATATTTATTAGCTGGTTGGAGAGCTAGAACCTGGAGAGCTAGAACCTGGAGAACTAGAACCTGGA	GAGAGTGCAGGCCTGCTCAGGGACTGTTCCTGTCTCAGCAACCAAGGGATTGTTCCTGTCAATCAATGGTTTATTGGAAGGTGGCCCAGTATGAGCCCTAGAAGAGTGTGAAAAGGAATG[G/A]CAATGGTGTTCACCATCGGCAGTGCCAGGGCAGCACTCATTCACTTGATAAATGAATATTTATTAGCTGGTTGGAGAGCTAGAACCTGGAGAGCTAGAACCTGGAGAACTAGAACCTGGA	G	A	0.0290015	0.00320915	0.970999	0.00320915	0.000734214	0.000715962	0.0565345	0.000715962	0.942731	0.000715962	1362	2	0.0547348	0.0565345	0.0563208	0.0196163	0.888614	1	1	77	1284	0.831745	14	95778983	-30256	5	35	624	mrna-utr	A/G	0.0820409	0.185175	YES	2	2	2	1	reference
BDKRB2_rs4900312	BDKRB2	http://www.ncbi.nlm.nih.gov/entrez/query.fcgi?db=gene&cmd=Retrieve&dopt=full_report&list_uids=624	rs4900312		http://www.ncbi.nlm.nih.gov/SNP/snp_ref.cgi?rs=4900312	A	G	GTAGGCCATCTAAGGATGGCTCTTTGAAGAGCAGACAGGAGAAGGGCAATCCCAGGAAGTGCTATGTGCTATGCAGAGAATTAGAATAAGTTGATGGCAGAGATCAGTGGGTGGCGGCTC[A/G]CTTGGGTGGTAAAGAGTAGCCTGCAGCCAAAGTTGGGCACAGCAGTGCAGTCTTCACTGGGGGAATGCCTGGGAAACAAGATTTGCCTGGGTAGGAGTTTCCATCAGCACCCCCAGAAAG	GTAGGCCATCTAAGGATGGCTCTTTGAAGAGCAGACAGGAGAAGGGCAATCCCAGGAAGTGCTATGTGCTATGCAGAGAATTAGAATAAGTTGATGGCAGAGATCAGTGGGTGGCGGCTC[A/G]CTTGGGTGGTAAAGAGTAGCCTGCAGCCAAAGTTGGGCACAGCAGTGCAGTCTTCACTGGGGGAATGCCTGGGAAACAAGATTTGCCTGGGTAGGAGTTTCCATCAGCACCCCCAGAAAG	A	G	0.201909	0.00783841	0.798091	0.00783841	0.0469897	0.00454538	0.309838	0.00454538	0.643172	0.00454538	1362	2	0.27035	0.309838	0.322283	2.03091	0.154129	0.1578	64	422	876	0.868975	14	95748727	14237	5	35	624	mrna-utr	A/G	0.261383	0.249741	YES	2	2	2	1	reference
BDKRB2_rs4905470	BDKRB2	http://www.ncbi.nlm.nih.gov/entrez/query.fcgi?db=gene&cmd=Retrieve&dopt=full_report&list_uids=624	rs4905470		http://www.ncbi.nlm.nih.gov/SNP/snp_ref.cgi?rs=4905470	A	G	TCTGGGCCTCCATGCCCATCTCTGTAGCATGAGGGATTCTGATGAAATAATTTCCAAGAGCCCTTCCCACACTAATACTCCAGGATTCTGTAAGGTTAATTTGGCAAGAATTCCAACGGC[A/G]GAAGAAAGATGGAGGGAGGAATATGTCCAGTCTAATAACCCTATGCTCAAGTCAGAAAGCCCCTCGGGCAGTGTCCGAGAGGGCTACAGCCCTGGCCCCAGAACCTGAGTCCCTCTAACC	tctgggcctccatgcccatctctgtagcatgagggattctgatgaaataatttccaagagcccttcccacactaatactccaggattctgtaaGGTTAATTTGGCAAGAATTCCAACGGC[G/A]GAAGAAAGATGGAGGGAGGAATATGTCCAGTCTAATAACCCTATGCTCAAGTCAGAAAGCCCCTCGGGCAGTGTCCGAGAGGGCTACAGCCCTGGCCCCAGAACCTGAGTCCCTCTAACC	G	A	0.161527	0.00706007	0.838473	0.00706007	0.0264317	0.0036854	0.270191	0.0036854	0.703377	0.0036854	1362	2	0.234186	0.270191	0.270872	0.00861854	0.926034	0.9201	36	368	958	0.823232	14	95762964	4153	5	35	624	mrna-utr	A/G	0.359142	0.224918	YES	2	2	2	1	reference
BDKRB2_rs4905474	BDKRB2	http://www.ncbi.nlm.nih.gov/entrez/query.fcgi?db=gene&cmd=Retrieve&dopt=full_report&list_uids=624	rs4905474		http://www.ncbi.nlm.nih.gov/SNP/snp_ref.cgi?rs=4905474	A	G	CACCCAGCCTAGTTATTTATTTATTTATTTTTTTTTTAAAGAGAGAGATGTTATTTTTTTTAAGGGGAATGAGTGGTATTAGGATGTCAAATGAAATTGCTTATTTAATAAAACTGAAAA[A/G]CCCAGTTTGGGGAAAGAAACAAAACACACTGAGCAGAATAATCTAACCACAGTGAACAGGAAAAAAAGCCAAGAATAAAATAAGTTCCGGGGTATCCAAGGGTGAGCAAAGCCAGGCCGG	cacccagccTAGttatttatttatttattttttttttaaaGAGAGAGATGTTATTTTTTTTAAGGGGAATGAGTGGTATTAGGATGTCAAATGAAATTGCTTATTTAATAAAACTGAAAA[G/A]CCCAGTTTGGGGAAAGAAACAAAACACACTGAGCAGAATAATCTAACCACAGTGAACAGGAAAAAAAGCCAAGAATAAAATAAGTTCCGGGGTATCCAAGGGTGAGCAAAGCCAGGCCGG	G	A	0.207048	0.00789451	0.792952	0.00789451	0.0484581	0.00460178	0.317181	0.00460178	0.634361	0.00460178	1362	2	0.274449	0.317181	0.328359	1.57842	0.208989	0.2219	66	432	864	0.871698	14	95767117	-26703	5	35	624	mrna-utr	A/G	0.4381	0.164676	YES	2	2	2	1	reference
BDKRB2_rs945032	BDKRB2	http://www.ncbi.nlm.nih.gov/entrez/query.fcgi?db=gene&cmd=Retrieve&dopt=full_report&list_uids=624	rs945032		http://www.ncbi.nlm.nih.gov/SNP/snp_ref.cgi?rs=945032	A	G	TTTACGCGGAAGGTGTAAACAGAGGGTGGCCAGGTGGGCAGGCGGAGTCCTGGGATTTCTTTGTATGCCACGTACGGCTCCCAAGGGCGACAGTGGCAGAAGCTGTCCTGTTTCCTGGGT[A/G]CGGGTGTTTGCGCTCCCCTGAGACACGCGGCCGTTTCTTCGGAGATGTATGGCGGAGGTTTCTCCCATGTCAAGGCTCAGGCTGGCTTTCTCAGTTTTGCTCAAAGACTTACTAACTATC	TTTACGCGGAAGGTGTAAACAGAGGGTGGCCAGGTGGGCAGGCGGAGTCCTGGGATTTCTTTGTATGCCACGTACGGCTCCCAAGGGCGACAGTGGCAGAAGCTGTCCTGTTTCCTGGGT[A/G]CGGGTGTTTGCGCTCCCCTGAGACACGCGGCCGTTTCTTCGGAGATGTATGGCGGAGGTTTCTCCCATGTCAAGGCTCAGGCTGGCTTTCTCAGTTTTGCTCAAAGACTTACTAACTATC	A	G	0.186123	0.00757942	0.813877	0.00757942	0.0396476	0.00427524	0.292952	0.00427524	0.667401	0.00427524	1362	2	0.25707	0.292952	0.302963	1.48725	0.222644	0.2383	54	399	909	0.889412	14	95740414	13537	5	35	624	locus-region	A/G	0.326371	0.238049	YES	2	2	2	1	reference
BDKRB2_rs945039	BDKRB2	http://www.ncbi.nlm.nih.gov/entrez/query.fcgi?db=gene&cmd=Retrieve&dopt=full_report&list_uids=624	rs945039		http://www.ncbi.nlm.nih.gov/SNP/snp_ref.cgi?rs=945039	A	G	AGGCAGGGACAGGCTATGCATCCAGGAAGCCCCCAGGCTCTAAGGAGGCGGCCCTATAACTGCTGGATGACCAAAAATCAGGCAGCGATCCCTAAGTCCCTTCTGAGCCCCAGGCTCCAG[A/G]CTCCTCCAACCAGGTCTGCCTTACGCTTTTGACCACAATCAACCCGGCTCTTTCTCGGTTCTTTTCATCTCTCTGGTGGTTTTGTATGCAGAGTCACCCAGGTCCCCACTTACGAGCCTG	caggctcgtaagtggggacctgggTGACTCTGCATACAAAACCACCAGAGAGATGAAAAGAACCGAGAAAGAGCCGGGTTGATTGTGGTCAAAAGCGTAAGGCAGACCTGGTTGGAGGAG[C/T]CTGGAGCCTGGGGCTCAGAAGGGACTTAGGGATCGCTGCCTGATTTTTGGTCATCCAGCAGTTATAGGGCCGCCTCCTTAGAGCCTGGGGGCTTCCTGGATGCATAGCCTGTCCCTGCCT	C	T	0.241924	0.00827535	0.758076	0.00827535	0.061674	0.00503022	0.360499	0.00503022	0.577827	0.00503022	1362	2	0.299525	0.360499	0.366793	0.40103	0.526558	0.558	84	491	787	0.687857	14	95753951	2951303	5	35	624	mrna-utr	C/T	0.478214	0.10207	YES	2	2	2	1	reference
BMP7_rs162315	BMP7	http://www.ncbi.nlm.nih.gov/entrez/query.fcgi?db=gene&cmd=Retrieve&dopt=full_report&list_uids=655	rs162315		http://www.ncbi.nlm.nih.gov/SNP/snp_ref.cgi?rs=162315	A	G	CTCACTAAGTTATAGTTGTCTGATACAAAGGGAGGGCCACAACCAAAGAAATTGGCAACCCACTCTGTAGACTTGCAAAGGGCAGCTGGTGCTTAAACAGAACCTGCAGTATTCAGAGCC[A/G]TGGGACAGTATTTAACACCCTAAAAATTAGGGGTATGAACCCAAATATATGCATATGTACAGTCGTACATCATAATGCACAAAACTAAACGAACACAATACATTGTTACAAACACGAGAA	CTCACTAAGTTATAGTTGTCTGATACAAAGGGAGGGCCACAACCAAAGAAATTGGCAACCCACTCTGTAGACTTGCAAAGGGCAGCTGGTGCTTAAACAGAACCTGCAGTATTCAGAGCC[G/A]TGGGACAGTATTTAACACCCTAAAAATTAGGGGTATGAACCCAAATATATGCATATGTACAGTCGTACATCATAATGCACAAAACTAAACGAACACAATACATTGTTACAAACACGAGAA	G	A	0.248164	0.00821272	0.751836	0.00821272	0.0587372	0.00500227	0.378855	0.00500227	0.562408	0.00500227	1362	2	0.303534	0.378855	0.373158	0.317446	0.573147	0.6116	80	516	766	0.935361	20	55242287	3398		35	655	intron	A/G	0.448028	0.152594	YES	2	2	2	1	reference
BMP7_rs162317	BMP7	http://www.ncbi.nlm.nih.gov/entrez/query.fcgi?db=gene&cmd=Retrieve&dopt=full_report&list_uids=655	rs162317		http://www.ncbi.nlm.nih.gov/SNP/snp_ref.cgi?rs=162317	A	G	TAGAATTCCATGTTCCTCACTCAGAGTCTGGTTTCTGTGAGCACAGACTAGTCCAAAGCATTCTTCAGCTCCAGTTAGGGGCCGGGGACAGACCCCCACACCCCACTTTAATGAGGATGA[A/G]GCTCAAGGGGCTAAAAGAACTAATCGAAGTCCACATTATAACCAGAAGTCAGAACTGGGTTTTCACAGACCCGAGGACTGCTCAGGGCCCCATATCCCGGAACGTCCCCGGTACCCATTT	TAGAATTCCATGTTCCTCACTCAGAGTCTGGTTTCTGTGAGCACAGACTAGTCCAAAGCATTCTTCAGCTCCAGTTAGGGGCCGGGGACAGACCCCCACACCCCACTTTAATGAGGATGA[A/G]GCTCAAGGGGCTAAAAGAACTAATCGAAGTCCACATTATAACCAGAAGTCAGAACTGGGTTTTCACAGACCCGAGGACTGCTCAGGGCCCCATATCCCGGAACGTCCCCGGTACCCATTT	A	G	0.407856	0.00953591	0.592144	0.00953591	0.17254	0.00655368	0.470631	0.00655368	0.356828	0.00655368	1362	2	0.366365	0.470631	0.483019	0.895821	0.343905	0.3465	235	641	486	0.96358	20	55245685	6356		35	655	intron	A/G	0.479279	0.0996544	YES	2	2	2	1	reference
BMP7_rs162321	BMP7	http://www.ncbi.nlm.nih.gov/entrez/query.fcgi?db=gene&cmd=Retrieve&dopt=full_report&list_uids=655	rs162321		http://www.ncbi.nlm.nih.gov/SNP/snp_ref.cgi?rs=162321	A	G	GGTCGTGAACTTGGCACGTCTAACAATTACCAGCAGGATACCACTCGCCAGGTGCTTGGTGGGGAGTGTTTGCTCCCTAGGTGACCCCATGAGCAGAGTGAGGATCCTTGTACCTGTTCA[A/G]CAGCCCCCATCCCAGGCCTCAAACCCGTAAGTCAGGAGTTAAATTCCTGAATTTCTCACACTGGGAACGCCATTTCATTAATTTTTTTAATTATTTTTTTTTTAGGGCAGAGTCTTGCTG	cagcaagactctgccctaaaaaaaaaataattaaaaaaaTTAATGAAATGGCGTTCCCAGTGTGAGAAATTCAGGAATTTAACTCCTGACTTACGGGTTTGAGGCCTGGGATGGGGGCTG[T/C]TGAACAGGTACAAGGATCCTCACTCTGCTCATGGGGTCACCTAGGGAGCAAACACTCCCCACCAAGCACCTGGCGAGTGGTATCCTGCTGGTAATTGTTAGACGTGCCAAGTTCACGACC	T	C	0.873348	0.00637552	0.126652	0.00637552	0.762849	0.0030048	0.220999	0.0030048	0.0161527	0.0030048	1362	2	0.196753	0.220999	0.221223	0.00139621	0.970193	1	1039	301	22	0.938254	20	55252041	25189		35	655	intron	C/T	0.297521	0.245442	YES	2	2	2	1	reference
BMP7_rs2208405	BMP7	http://www.ncbi.nlm.nih.gov/entrez/query.fcgi?db=gene&cmd=Retrieve&dopt=full_report&list_uids=655	rs2208405		http://www.ncbi.nlm.nih.gov/SNP/snp_ref.cgi?rs=2208405	A	C	GGAGAGGCAGATCTTGTCTATCACTCTCTCTGGAAACAATTCAGAAGCCAGGCAGAGGAGGACATGCAGGAGGGAGAAGGAAAGGTGGGCATCCTGGCAAGCAGGAATCCTACCCCAGGG[A/C]GACTGGGGAAATTGCAGGAGTGCCACAGTCGTCCAGGGTCCATCTGAGAGTGTACAACTGGAGAGCCTGGGTCACTTCAGCCTGCAATAAGTGACAGGCAGTGGGGGCGGGGGCGCAGAT	GGAGAGGCAGATCTTGTCTATCACTCTCTCTGGAAACAATTCAGAAGCCAGGCAGAGGAGGACATGCAGGAGGGAGAAGGAAAGGTGGGCATCCTGGCAAGCAGGAATCCTACCCCAGGG[A/C]GACTGGGGAAATTGCAGGAGTGCCACAGTCGTCCAGGGTCCATCTGAGAGTGTACAACTGGAGAGCCTGGGTCACTTCAGCCTGCAATAAGTGACAGGCAGTGGGGGCGGGGGCGCAGAT	A	C	0.963289	0.00353374	0.0367107	0.00353374	0.926579	0.000259452	0.0734214	0.000259452			1362	2	0.068225	0.0734214	0.0707261	1.97811	0.15959	0.2577	1262	100	0	0.826793	20	55277230			35	655	locus-region, 5'	A/C			YES	2	2	2	1	reference
BMP7_rs3787380	BMP7	http://www.ncbi.nlm.nih.gov/entrez/query.fcgi?db=gene&cmd=Retrieve&dopt=full_report&list_uids=655	rs3787380		http://www.ncbi.nlm.nih.gov/SNP/snp_ref.cgi?rs=3787380	A	G	GGCCACTTTCTGCTGGGACAGCCGTGATCAAAGAGCCCTGGAAGCACAGAGCAGGGTCTGGAGTCCCTGGTGGCAGGGCCAGTGCCCACGCCTCACTCGTACACCATAACTAGCTTCATG[A/G]GCTGTGCTCGGCCTTGGTCTGTTTGGCCTTGGGTTTGAACTAAGTTATGCCAAATGTCGTGGCTTTACTTTAAGACAGGGTTGGGGAAAGTAGCACTCAGGCCACTCCTTGTCCCTTCTG	CAGAAGGGACAAGGAGTGGCCTGAGTGCTACTTTCCCCAACCCTGTCTTAAAGTAAAGCCACGACATTTGGCATAACTTAGTTCAAACCCAAGGCCAAACAGACCAAGGCCGAGCACAGC[T/C]CATGAAGCTAGTTATGGTGTACGAGTGAGGCGTGGGCACTGGCCCTGCCACCAGGGACTCCAGACCCTGCTCTGTGCTTCCAGGGCTCTTTGATCACGGCTGTCCCAGCAGAAAGTGGCC	T	C	0.602866	0.00936916	0.397134	0.00936916	0.362968	0.00648861	0.479794	0.00648861	0.157237	0.00648861	1361	2	0.364195	0.479794	0.478837	0.00543528	0.94123	0.9544	494	653	214	0.892864	20	55187517	1222		35	655	intron	C/T	0.411357	0.190955	YES	2	2	2	1	reference
BMP7_rs3787383	BMP7	http://www.ncbi.nlm.nih.gov/entrez/query.fcgi?db=gene&cmd=Retrieve&dopt=full_report&list_uids=655	rs3787383		http://www.ncbi.nlm.nih.gov/SNP/snp_ref.cgi?rs=3787383	A	T	CTTCTGAACATGCTTGGCATGAAGTTCAAACTCAAGACGTGACTCCCAAGAGAATGCCTG[A/T]CCCGCCCACCCTCACTCCCCTCCCCTGCTTCAGCCCCCACAGCCTCCTCCCCACTCCCCA	CTTCTGAACATGCTTGGCATGAAGTTCAAACTCAAGACGTGACTCCCAAGAGAATGCCTG[A/T]CCCGCCCACCCTCACTCCCCTCCCCTGCTTCAGCCCCCACAGCCTCCTCCCCACTCCCCA	A	T	0.957416	0.0039217	0.0425844	0.0039217	0.917768	0.00138198	0.0792952	0.00138198	0.00293686	0.00138198	1362	2	0.0782175	0.0792952	0.081542	1.0341	0.309198	0.2968	1250	108	4	0.842495	20	55188739	23637		35	655	intron	A/T	0.145181	0.226965	YES	1	1	1	1	reference
BMP7_rs4811822	BMP7	http://www.ncbi.nlm.nih.gov/entrez/query.fcgi?db=gene&cmd=Retrieve&dopt=full_report&list_uids=655	rs4811822		http://www.ncbi.nlm.nih.gov/SNP/snp_ref.cgi?rs=4811822	A	G	GACCTTTCGGATCCTGAGTTTTGAGTTCTGCACAATGGCATGGGGAATATTATCTACCCTACAGAGTGTTGTAAGAACTAAGTGACATGAGACTGGTCAGGCATTTCAACCTGGAGCCTG[A/G]CATATGGTAAGTGCTCCATAAAGGATATGCCTGACATCTTTACGTGTGAGCAGACAAGATTCACTATAATCACCAGGAAGATTAGATAACTCCAGGTATGATAGAGACTGTTGTTGCCCT	AGGGCAACAACAGTCTCTATCATACCTGGAGTTATCTAATCTTCCTGGTGATTATAGTGAATCTTGTCTGCTCACACGTAAAGATGTCAGGCATATCCTTTATGGAGCACTTACCATATG[C/T]CAGGCTCCAGGTTGAAATGCCTGACCAGTCTCATGTCACTTAGTTCTTACAACACTCTGTAGGGTAGATAATATTCCCCATGCCATTGTGCAGAACTCAAAACTCAGGATCCGAAAGGTC	C	T	0.510646	0.00946242	0.489354	0.00946242	0.254772	0.00676894	0.511747	0.00676894	0.23348	0.00676894	1362	2	0.374887	0.511747	0.499773	0.781839	0.376579	0.3894	347	697	318	0.968889	20	55212376	56142		35	655	intron	C/T	0.442298	0.159755	YES	2	2	2	1	reference
BMP7_rs4811832	BMP7	http://www.ncbi.nlm.nih.gov/entrez/query.fcgi?db=gene&cmd=Retrieve&dopt=full_report&list_uids=655	rs4811832		http://www.ncbi.nlm.nih.gov/SNP/snp_ref.cgi?rs=4811832	C	G	ATTTGTCAGATGCCATTTGCTGCAAAACCCGGAATTCAATCCCAGCTTGAACACACAGCTAATACCAAACGGCTCACTAATAGCCGCGGTCGTACATGGGATCATTTGCAGTGAACAAAC[C/G]CCCTTCCTCTATAAACTGTTTCAGGGATTGGAAAGAAAAGCATGTGAAGCTCTGGAATAAATAAAGCACCGTGCCTTGAGCTGCCCAGTACATGACCCTTGCATGCTGTGAGAACAGGCT	ATTTGTCAGATGCCATTTGCTGCAAAACCCGGAATTCAATCCCAGCTTGAACACACAGCTAATACCAAACGGCTCACTAATAGCCGCGGTCGTACATGGGATCATTTGCAGTGAACAAAC[G/C]CCCTTCCTCTATAAACTGTTTCAGGGATTGGAAAGAAAAGCATGTGAAGCTCTGGAATAAATAAAGCACCGTGCCTTGAGCTGCCCAGTACATGACCCTTGCATGCTGTGAGAACAGGCT	G	C	0.478708	0.00941349	0.521292	0.00941349	0.220999	0.00675739	0.515419	0.00675739	0.263583	0.00675739	1362	2	0.374546	0.515419	0.499093	1.45724	0.227369	0.2609	301	702	359	0.875863	20	55268518	-90612		35	655	intron	C/G	0.496291	0.0429021	YES	2	2	2	1	reference
BMP7_rs6014947	BMP7	http://www.ncbi.nlm.nih.gov/entrez/query.fcgi?db=gene&cmd=Retrieve&dopt=full_report&list_uids=655	rs6014947		http://www.ncbi.nlm.nih.gov/SNP/snp_ref.cgi?rs=6014947	A	G	GAGATGGCATAATAGGAGGTCTGATGGGTGCAGGATGTGCTGGACTTACATTGCAAATAGAAGCCTTGTTGAGGGTGACATCCTAACCAAGTGTCCCGATTTGGAGGTGGCATTTCTGAC[A/G]TGGCTCTTGGTGTAAGCCTGCCTTGCCTTGGCTGGTGAGTCCCATAAATAGTATGCACTCAGCCTCCGGCCACAAACACAAGGCCTAGGGGAGGGCTAGACTGTCTGCAAACGTTTTCTG	CAGAAAACGTTTGCAGACAGTCTAGCCCTCCCCTAGGCCTTGTGTTTGTGGCCGGAGGCTGAGTGCATACTATTTATGGGACTCACCAGCCAAGGCAAGGCAGGCTTACACCAAGAGCCA[C/T]GTCAGAAATGCCACCTCCAAATCGGGACACTTGGTTAGGATGTCACCCTCAACAAGGCTTCTATTTGCAATGTAAGTCCAGCACATCCTGCACCCATCAGACCTCCTATTATGCCATCTC	C	T	0.486417	0.00972657	0.513583	0.00972657	0.244493	0.00676604	0.483847	0.00676604	0.271659	0.00676604	1362	2	0.374815	0.483847	0.499631	1.35924	0.243669	0.2543	333	659	370	0.812678	20	55177906	85652		35	655	locus-region, 3'	C/T	0.499592	0.0142793	YES	2	2	2	1	reference
BMP7_rs6025468	BMP7	http://www.ncbi.nlm.nih.gov/entrez/query.fcgi?db=gene&cmd=Retrieve&dopt=full_report&list_uids=655	rs6025468		http://www.ncbi.nlm.nih.gov/SNP/snp_ref.cgi?rs=6025468	A	G	ACAATTATTTTTAAACCATAAAGACCGAGGAGAGGGGAGGTATCACAAGCAGGGTGGATAACAGAAGGGAAAGGTGTGTGCCTGCTTATCTCTATGTCACTTATCAGAACACGGGACCAC[A/G]GAGTCAAGGCCATGGGCTCGGCTTCTGTTTTAATGGTCTCAACATCATCTCCTCCACGCTCCCCGCTACCTATTCGATACCCCACAGGTTCAGGAGGAAAGAATGGGCAGCTCTGCACCC	ACAATTATTTTTAAACCATAAAGACCGAGGAGAGGGGAGGTATCACAAGCAGGGTGGATAACAGAAGGGAAAGGTGTGTGCCTGCTTATCTCTATGTCACTTATCAGAACACGGGACCAC[A/G]GAGTCAAGGCCATGGGCTCGGCTTCTGTTTTAATGGTCTCAACATCATCTCCTCCACGCTCCCCGCTACCTATTCGATACCCCACAGGTTCAGGAGGAAAGAATGGGCAGCTCTGCACCC	A	G	0.803965	0.00758265	0.196035	0.00758265	0.645374	0.00423905	0.317181	0.00423905	0.0374449	0.00423905	1362	2	0.265532	0.317181	0.315211	0.0531867	0.817608	0.8609	879	432	51	0.771954	20	55263558	-67204		35	655	intron	A/G	0.245873	0.249966	YES	2	2	2	1	reference
BMP7_rs6123674	BMP7	http://www.ncbi.nlm.nih.gov/entrez/query.fcgi?db=gene&cmd=Retrieve&dopt=full_report&list_uids=655	rs6123674		http://www.ncbi.nlm.nih.gov/SNP/snp_ref.cgi?rs=6123674	A	G	ATGAAAAACCCTTCGATTTCTTAGTCTGAACTGGTATTTTGGGTTGTTCTTGCCCCTTTCCTAGAGACTTGGGGACAGGGAGCATGGTGCCAGCCATCTGGAACCTGACGTGGAACAGGT[A/G]CTCTGAGGACAGGTATGGAATCTTCCCCTTTGTCACCAAGTTTGGAAAAAGGTTCAGATTTTTAACCTAAAGGCTGAACAACACCACAGCAGACACTTATTCACCTTCAACAACAACAAC	ATGAAAAACCCTTCGATTTCTTAGTCTGAACTGGTATTTTGGGTTGTTCTTGCCCCTTTCCTAGAGACTTGGGGACAGGGAGCATGGTGCCAGCCATCTGGAACCTGACGTGGAACAGGT[G/A]CTCTGAGGACAGGTATGGAATCTTCCCCTTTGTCACCAAGTTTGGAAAAAGGTTCAGATTTTTAACCTAAAGGCTGAACAACACCACAGCAGACACTTATTCACCTTCAACAACAACAAC	G	A	0.58884	0.00950943	0.41116	0.00950943	0.350954	0.0065667	0.475771	0.0065667	0.173275	0.0065667	1362	2	0.366983	0.475771	0.484215	0.414188	0.519851	0.533	478	648	236	0.954892	20	55196354	34110		35	655	intron	A/G	0.490373	0.0687069	YES	2	2	2	1	reference
BMP7_rs6127972	BMP7	http://www.ncbi.nlm.nih.gov/entrez/query.fcgi?db=gene&cmd=Retrieve&dopt=full_report&list_uids=655	rs6127972		http://www.ncbi.nlm.nih.gov/SNP/snp_ref.cgi?rs=6127972	A	C	ACGTTCAGTGAAGCCGAGCGGGTGTCCCCACGAGGTGGTCAGTCCTGCCCCTCTTGTAGACCACCTGTGGGAAAGGTCTGCTCTCTTTACGTTTCCATCGATTTAGCTGGGTCCACAATG[A/C]GATCTTGGAGCCTCCTCTCTCCCATGACACTTGTCTATGCTGGGAGAAGGGATGGCTGCCTTTGGGAACAGTCATGATGACAAAAGCTAATTGCATGCAATGGGGGCTCTTTACTGCTTC	GAAGCAGTAAAGAGCCCCCATTGCATGCAATTAGCTTTTGTCATCATGACTGTTCCCAAAGGCAGCCATCCCTTCTCCCAGCATAGACAAGTGTCATGGGAGAGAGGAGGCTCCAAGATC[G/T]CATTGTGGACCCAGCTAAATCGATGGAAACGTAAAGAGAGCAGACCTTTCCCACAGGTGGTCTACAAGAGGGGCAGGACTGACCACCTCGTGGGGACACCCGCTCGGCTTCACTGAACGT	G	T	0.409692	0.00951345	0.590308	0.00951345	0.17254	0.00656045	0.474302	0.00656045	0.353157	0.00656045	1362	2	0.366711	0.474302	0.483689	0.512901	0.473886	0.4627	235	646	481	0.81342	20	55230464	27418		35	655	intron	G/T	0.492628	0.060265	YES	2	2	2	1	reference
BMP7_rs6127983	BMP7	http://www.ncbi.nlm.nih.gov/entrez/query.fcgi?db=gene&cmd=Retrieve&dopt=full_report&list_uids=655	rs6127983		http://www.ncbi.nlm.nih.gov/SNP/snp_ref.cgi?rs=6127983	A	G	TGCGATGCAGTCACCCCTGCATCAGGGGTAGGCTAAAGACAGCAGGTAGGACAGACATTGGGTAGAGTGGGAATTACCTTTGAATTTCCATGGGAAGCTGTTTCGTTATGCAGTATCTCC[A/G]TATGGCTGAGTTCCTTCTCCCAGTTTCTCTCCCAGTGTTGCAGCAGATCACTGCTTCTTCCGTTGCACATGGGATGAAATAATCTGCTTGAGTGTAGGACCTGTATCATACCAAAACACT	AGTGTTTTGGTATGATACAGGTCCTACACTCAAGCAGATTATTTCATCCCATGTGCAACGGAAGAAGCAGTGATCTGCTGCAACACTGGGAGAGAAACTGGGAGAAGGAACTCAGCCATA[T/C]GGAGATACTGCATAACGAAACAGCTTCCCATGGAAATTCAAAGGTAATTCCCACTCTACCCAATGTCTGTCCTACCTGCTGTCTTTAGCCTACCCCTGATGCAGGGGTGACTGCATCGCA	T	C	0.643539	0.00916116	0.356461	0.00916116	0.413363	0.00621199	0.460352	0.00621199	0.126285	0.00621199	1362	2	0.353548	0.460352	0.458793	0.0157319	0.900186	0.9498	563	627	172	0.8697	20	55257882	285		35	655	intron	C/T	0.434943	0.168215	YES	1	1	1	1	reference
BMP7_rs6127985	BMP7	http://www.ncbi.nlm.nih.gov/entrez/query.fcgi?db=gene&cmd=Retrieve&dopt=full_report&list_uids=655	rs6127985		http://www.ncbi.nlm.nih.gov/SNP/snp_ref.cgi?rs=6127985	A	G	TTGAGTAAATAAGATACATATAATGTTTGAAATGTGAAGGTACTCAGGGAAGTGTATAGTCTTGGATATGAGGGCTGTATTTAGTCACAAACTTCCAGGCATCTCCAATGAATTACAGCT[A/G]CTGAACTAAAACATCATCAGGCCATTGTCATGTTCTCCATTGATATTGGTCTACTGTCATGTTCACGGATGAGCCTAGAAGAGGCTCTGCAGCGAGACTGGACCCCCAAGGCAGCCAGGA	TTGAGTAAATAAGATACATATAATGTTTGAAATGTGAAGGTACTCAGGGAAGTGTATAGTCTTGGATATGAGGGCTGTATTTAGTCACAAACTTCCAGGCATCTCCAATGAATTACAGCT[G/A]CTGAACTAAAACATCATCAGGCCATTGTCATGTTCTCCATTGATATTGGTCTACTGTCATGTTCACGGATGAGCCTAGAAGAGGCTCTGCAGCGAGACTGGACCCCCAAGGCAGCCAGGA	G	A	0.161894	0.00715821	0.838106	0.00715821	0.0301028	0.00384876	0.263583	0.00384876	0.706314	0.00384876	1362	2	0.234548	0.263583	0.271369	1.12123	0.289655	0.2743	41	359	962	0.951106	20	55258167	-21825814		35	655	intron	A/G	0.281728	0.247979	YES	2	2	2	1	reference
C10orf110_rs10508204	C10orf110	http://www.ncbi.nlm.nih.gov/entrez/query.fcgi?db=gene&cmd=Retrieve&dopt=full_report&list_uids=55853	rs10508204		http://www.ncbi.nlm.nih.gov/SNP/snp_ref.cgi?rs=10508204	A	G	AGATCCCCTCTTGACAGATTTTCTTTTTATTATTTCAGATACACCTCTTCTTCACCCTTCCTCTCTGGGTGCTTTTTCAGCCCTAAGTATGTACTTACACATTTTATAACATTTTATAGC[A/G]TGAACTGAAGTGTGTATTTGTGTGTATTCAGGTATCCTGACAGCTTTCTGCTTTACAATTTTCACACATTATACTTATTTACCATACATGGTTTAGACTCCCAAACGTAAATCTCCAACA	AGATCCCCTCTTGACAGATTTTCTTTTTATTATTTCAGATACACCTCTTCTTCACCCTTCCTCTCTGGGTGCTTTTTCAGCCCTAAGTATGTACTTACACATTTTATAACATTTTATAGC[G/A]TGAACTGAAGTGTGTATTTGTGTGTATTCAGGTATCCTGACAGCTTTCTGCTTTACAATTTTCACACATTATACTTATTTACCATACATGGTTTAGACTCCCAAACGTAAATCTCCAACA	G	A	0.515786	0.00961262	0.484214	0.00961262	0.267988	0.00676724	0.495595	0.00676724	0.236417	0.00676724	1362	2	0.374751	0.495595	0.499502	0.0833242	0.772842	0.7906	365	675	322	0.907221	10	1074360	-8583	1	35	55853	intron	A/G	0.499451	0.0165655	YES	2	2	2	1	reference
C10orf110_rs10508206	C10orf110	http://www.ncbi.nlm.nih.gov/entrez/query.fcgi?db=gene&cmd=Retrieve&dopt=full_report&list_uids=55853	rs10508206		http://www.ncbi.nlm.nih.gov/SNP/snp_ref.cgi?rs=10508206	A	C	CTTGAGCTAAGTAAATGGTTAATAATAGGAGTTGATTTACATGCTTGCATTTATCTATTTTTTTCATTTACATACAACTCCTTGTGGGAAAGTGCACTAA[A/C]GATGCTGAGTACAAAAACTTTGTATTTATTTGCAGGATATATCTGAATATTTTTAATTAATTAAATAACCGAAGTTCCAAATTATAAACCTACAATCATG	CTTGAGCTAAGTAAATGGTTAATAATAGGAGTTGATTTACATGCTTGCATTTATCTATTTTTTTCATTTACATACAACTCCTTGTGGGAAAGTGCACTAA[A/C]GATGCTGAGTACAAAAACTTTGTATTTATTTGCAGGATATATCTGaatatttttaattaattaaataaCCGAAGTTCCAAATTATAAACCTACAATCATG	A	C	0.776799	0.00811454	0.223201	0.00811454	0.609398	0.00483645	0.334802	0.00483645	0.0558003	0.00483645	1362	2	0.286642	0.334802	0.346765	1.62103	0.202948	0.2136	830	456	76	0.7761	10	1065777	-2247	1	35	55853	mrna-utr	A/C	0.260643	0.249773	YES	2	2	2	1	reference
C10orf110_rs10508207	C10orf110	http://www.ncbi.nlm.nih.gov/entrez/query.fcgi?db=gene&cmd=Retrieve&dopt=full_report&list_uids=55853	rs10508207		http://www.ncbi.nlm.nih.gov/SNP/snp_ref.cgi?rs=10508207	A	G	ATCTATTCCTAGAGTTTATTCTTAACCTCCTACCTGCAGCATTATAGGTCATCAACTGTCATTCTTAAAGTTGTCATAACCTCTCTTAAGAAAATTCTCC[A/G]CATATAGCCTAATCAAAATGTCTTCCTTCCTTTCCTTTATAATGTTTTTTGTGTGCTTTATGTGTCAGAACCTTGTACCCAGATCAACCTAGCAAAGGGT	ATCTATTCCTAGAGTTTATTCTTAACCTCCTACCTGCAGCATTATAGGTCATCAACTGTCATTCTTAAAGTTGTCATAACCTCTCTTAAGAAAATTCTCC[G/A]CATATAGCCTAATCAAAATGTCTTCCTTCCTTTCCTTTATAATGTTTTTTGTGTGCTTTATGTGTCAGAACCTTGTACCCAGATCAACCTAGCAAAGGGT	G	A	0.00734214	0.00162965	0.992658	0.00162965			0.0146843	2.39303e-05	0.985316	2.39303e-05	1362	2	0.0144702	0.0146843	0.0145765	0.0745116	0.784878	1	0	20	1342	0.905916	10	1063530	154	1	35	55853	mrna-utr	A/G	0.0271442	0.113293	YES	2	2	2	1	reference
C10orf110_rs10751789	C10orf110	http://www.ncbi.nlm.nih.gov/entrez/query.fcgi?db=gene&cmd=Retrieve&dopt=full_report&list_uids=55853	rs10751789		http://www.ncbi.nlm.nih.gov/SNP/snp_ref.cgi?rs=10751789	A	G	TAAGAATGACAGTTGATGACCTATAATGCTGCAGGTAGGAGGTTAAGAATAAACTCTAGGAATAGATGATTACATCTGATTAAGGCAAATTAGAAGCAACAGAAAGGGCTCTAGATATCA[A/G]TGAAATATAGAGAAGGACATGGAGGCCAAGACTGGGAAAAGCAGGTAAAAAGAAATGGAAGTGGAAAGAGTTAAAAAGGAGTAGGCCAAGTATTGTAGGTATGAAAGAGAGGGTAAAACA	TAAGAATGACAGTTGATGACCTATAATGCTGCAGGTAGGAGGTTAAGAATAAACTCTAGGAATAGATGATTACATCTGATTAAGGCAAATTAGAAGCAACAGAAAGGGCTCTAGATATCA[G/A]TGAAATATAGAGAAGGACATGGAGGCCAAGACTGGGAAAAGCAGGTAAAAAGAAATGGAAGTGGAAAGAGTTAAAAAGGAGTAGGCCAAGTATTGTAGGTATGAAAGAGAGGGTAAAACA	G	A	0.282673	0.0087236	0.717327	0.0087236	0.0844347	0.00554984	0.396476	0.00554984	0.51909	0.00554984	1362	2	0.323307	0.396476	0.405538	0.680052	0.409569	0.4214	115	540	707	0.964978	10	1063684	22854	1	35	55853	mrna-utr	A/G	0.340617	0.232999	YES	2	2	2	1	reference
C10orf110_rs12359250	C10orf110	http://www.ncbi.nlm.nih.gov/entrez/query.fcgi?db=gene&cmd=Retrieve&dopt=full_report&list_uids=23560	rs12359250		http://www.ncbi.nlm.nih.gov/SNP/snp_ref.cgi?rs=12359250	A	C	CCAAGGAAAAAAAAAATCACTAAGCTTCTAAAGGCCAAAGTATTCTAATATTAAACATTGAAATAAATGTGAGCTATACATACATTTAAGAAAGATGAATAAAAAGATAATTATTACTTA[A/C]TTATTCCAGTTCTGGGTCATGTGTAGCTGAAGCCTGTTTCAGTAGCTCAGGGCACAAAGAGGGAACCAGCCCTGGACAGGACGCCATTCCATCACAGGGCCACTCACACACCCACACTCA	ccaaggaaaaaaaaaatcactaagcttctaaaggccaaagtattctaatattaaacattgaaataaatgtgagctatacatacatttaagaaagatgaataaaaagataattattactta[A/C]ttattccagttctgggtcatgtgtagctgaagcctgtttcagtagctcagggcacaaagagggaaccagccctggacaggacgccattccatcacagggccactcacacacccacactca	A	C	0.781571	0.00793385	0.218429	0.00793385	0.611601	0.00464455	0.339941	0.00464455	0.0484581	0.00464455	1362	2	0.283146	0.339941	0.341435	0.0260784	0.871709	0.8756	833	463	66	0.892567	10	1086538		1	35	23560	locus-region	A/C	0.260355	0.249785	YES	2	2	2	1	reference
C10orf110_rs3750729	C10orf110	http://www.ncbi.nlm.nih.gov/entrez/query.fcgi?db=gene&cmd=Retrieve&dopt=full_report&list_uids=55853	rs3750729		http://www.ncbi.nlm.nih.gov/SNP/snp_ref.cgi?rs=3750729	A	G	AACAAGACAACGCTGAAGGCTCGGTGCAGCAGCCCTGCAAAGGTAAGTGCCATTTGTGTGAGTGCATGCCTGGAGTCTGTACGATTGTCCTTCGTGCTTTTTGTCCTCAGTCTGTTTCTC[A/G]TAGAAAAGCCTGTGATTGTGGCACCTGGGCAGGGCAAAGGGGACTGCTGGATGCCCAAACACAACGTTTCAGAATCTCAGCGGATTAGAACACTCGGGAAACTAAAAATAGATCTACCAG	AACAAGACAACGCTGAAGGCTCGGTGCAGCAGCCCTGCAAAGGTAAGTGCCATTTGTGTGAGTGCATGCCTGGAGTCTGTACGATTGTCCTTCGTGCTTTTTGTCCTCAGTCTGTTTCTC[G/A]TAGAAAAGCCTGTGATTGTGGCACCTGGGCAGGGCAAAGGGGACTGCTGGATGCCCAAACACAACGTTTCAGAATCTCAGCGGATTAGAACActcgggaaactaaaaatagatctaccag	G	A	0.57746	0.00960329	0.42254	0.00960329	0.340675	0.00661824	0.473568	0.00661824	0.185756	0.00661824	1362	2	0.368928	0.473568	0.488	1.19117	0.275093	0.2872	464	645	253	0.882974	10	1058802	10570	1	35	55853	mrna-utr	A/G	0.498855	0.0238959	YES	2	2	2	1	reference
C10orf110_rs3793778	C10orf110	http://www.ncbi.nlm.nih.gov/entrez/query.fcgi?db=gene&cmd=Retrieve&dopt=full_report&list_uids=55853	rs3793778		http://www.ncbi.nlm.nih.gov/SNP/snp_ref.cgi?rs=3793778	A	G	TTTCAGCCATGAGAAGACTACTGCTCTTCCTCCAACACTCACTTCTCTATTTTCTCTATCGTTTGATCCTGTCTCCTGTACAACTGGGTGGTATTTAACC[A/G]TGTTTAGGCTCAGGTATAACCCAAGCTCTGAAACTGTAATAGAAAATTAAGTAAATGAAAGGCAAAAAATGAAAGACTTAATAAGGTTTAAGCTGTTATT	TTTCAGCCATGAGAAGACTACTGCTCTTCCTCCAACACTCACTTCTCTATTTTCTCTATCGTTTGATCCTGTCTCCTGTACAACTGGGTGGTATTTAACC[A/G]TGTTTAGGCTCAGGTATAACCCAAGCTCTGAAACTGTAATAGAAAATTAAGTAAATGAAAGGCAAAAAATGAAAGACTTAATAAGGTTTAAGCTGTTATT	A	G	0.900147	0.0057541	0.0998532	0.0057541	0.810573	0.00246507	0.179148	0.00246507	0.010279	0.00246507	1362	2	0.163607	0.179148	0.179765	0.0160291	0.899252	0.8851	1104	244	14	0.968255	10	1069372	1418	1	35	55853	mrna-utr	A/G	0.107755	0.205588	YES	2	2	2	1	reference
C10orf110_rs4880757	C10orf110	http://www.ncbi.nlm.nih.gov/entrez/query.fcgi?db=gene&cmd=Retrieve&dopt=full_report&list_uids=55853	rs4880757		http://www.ncbi.nlm.nih.gov/SNP/snp_ref.cgi?rs=4880757	C	G	ATGATTAAGTTGTAAATTTCAAAAATTCTAAGAATGCCTATTGTTGGCCAGAAGTATAAAAATTGGAAAGATTTTAATAAAATCATCTTTCAATCTTACTTAAATAGGTCTATGAAGTCT[C/G]CATCTCTTCCTCTGGAAAGTAACGTAAGGGCTGTGAAGAACATTGTCCATAATGAAACTGAGAAGGGCTGTTCTCCCTGGGAACAGAAAGGTCACTGTCTTTGCTCAACAAACAGCCTAA	ATGATTAAGTTGTAAATTTCAAAAATTCTAAGAATGCCTATTGTTGGCCAGAAGTATAAAAATTGGAAAGATTTTAATAAAATCATCTTTCAATCTTACTTAAATAGGTCTATGAAGTCT[G/C]CATCTCTTCCTCTGGAAAGTAACGTAAGGGCTGTGAAGAACATTGTCCATAATGAAACTGAGAAGGGCTGTTCTCCCTGGGAACAGAAAGGTCACTGTCTTTGCTCAACAAACAGCCTAA	G	C	0.346182	0.00931686	0.653818	0.00931686	0.129956	0.00618396	0.432452	0.00618396	0.437592	0.00618396	1362	2	0.35022	0.432452	0.45268	2.71952	0.0991277	0.1079	177	589	596	0.921158	10	1070790	10405	1	35	55853	mrna-utr	C/G	0.477212	0.104281	YES	2	2	2	1	reference
C10orf110_rs7075141	C10orf110	http://www.ncbi.nlm.nih.gov/entrez/query.fcgi?db=gene&cmd=Retrieve&dopt=full_report&list_uids=23185	rs7075141		http://www.ncbi.nlm.nih.gov/SNP/snp_ref.cgi?rs=7075141	A	G	TCCTACCTTAGTGCATCAAACATTAATTTTCTGAACCCCCATTTATCCCTCCCATGTGATTACAACGTAAAGCACTTATTAGGGTACTTTCAGTATTCTGACTCACACTTTTACATATCT[A/G]TATCCAGCAGCGTCTAAGCTTTCTAATCTTTGTATCCTTCAGGGCACCTTTACATAGTCTGACCTTGAAGTTTTTTATTCCCTTTTTTCTTCTCCTTTATTTCTGAATGAATAATAATTT	tcctaccttagtgcatcaaacattaattttctgaacccCCATTTATCCCTCCCATGTGATTACAACGTAAAGCACTTATTAGGGTACTTTCAGTATTCTGACTCACACTTTTACATATCT[G/A]TATCCAGCAGCGTCTAAGCTTTCTAATCTTTGTATCCTTCAGGGCACCTTTACATAGTCTGACCTTGAAGTTTTTTATTCCCTTTTTTCTTCTCCTTTATTTCTGAATGAATAATAATTT	G	A	0.667034	0.00916298	0.332966	0.00916298	0.451542	0.00606027	0.430984	0.00606027	0.117474	0.00606027	1362	2	0.345543	0.430984	0.444199	1.20557	0.27221	0.272	615	587	160	0.960017	10	1081195	-48372	1	35	23185	intron	A/G	0.391866	0.205849	YES	2	2	2	1	reference
C1orf125_rs10494516	C1orf125	http://www.ncbi.nlm.nih.gov/entrez/query.fcgi?db=gene&cmd=Retrieve&dopt=full_report&list_uids=126859	rs10494516		http://www.ncbi.nlm.nih.gov/SNP/snp_ref.cgi?rs=10494516	A	G	AAAGAACGTGTAAGGCAGCCTTCCAGAAGTGCCCTAAGCAGTCCCATTATACAGCAATGTGCCATTCTGCCAGGACAATGCTTCTATTCTTAAATGTCCA[A/G]TGAAAGGGCACCTGCAAGACTGCAGTGGCTTCTGTCGGTTTGGAGGGCATCCTCTGGTATTTGCCAGGTTTGGGTCCCACGAGCACCTGACCTGGCAGAG	CTCTGCCAGGTCAGGTGCTCGTGGGACCCAAACCTGGCAAATACCAGAGGATGCCCTCCAAACCGACAGAAGCCACTGCAGTCTTGCAGGTGCCCTTTCA[T/C]TGGACATTTAAGAATAGAAGCATTGTCCTGGCAGAATGGCACATTGCTGTATAATGGGACTGCTTAGGGCACTTCTGGAAGGCTGCCTTACACGTTCTTT	T	C	0.68649	0.00905592	0.31351	0.00905592	0.479442	0.0058987	0.414097	0.0058987	0.106461	0.0058987	1362	2	0.337802	0.414097	0.430443	1.96406	0.16108	0.165	653	564	145	0.91532	1	176248373	-435	9	35	126859	mrna-utr	C/T	0.449951	0.150066	YES	2	2	2	1	reference
C1orf125_rs963062	C1orf125	http://www.ncbi.nlm.nih.gov/entrez/query.fcgi?db=gene&cmd=Retrieve&dopt=full_report&list_uids=126859	rs963062		http://www.ncbi.nlm.nih.gov/SNP/snp_ref.cgi?rs=963062	C	G	CTAGCAAGCACTGCAGTTTTGCAGGTATGCAGGGCCTACGCAGCAGGGCTACAGCAGTTTTATTCCTAATTTTAGAGAAACTCCTCTGCTTCCT[C/G]TGGGGAAATACTTGCTGGTAGATGGATACTTATTTGATTTCAGGAATACCCAGACAGTGATCTAGAGCTTTGGGGCCTGCAAGCAGAATTTCCAGCAGGCTTTAAAAGTGAAATGCAAGA	TCTTGCATTTCACTTTTAAAGCCTGCTGGAAATTCTGCTTGCAGGCCCCAAAGCTCTAGATCACTGTCTGGGTATTCCTGAAATCAAATAAGTATCCATCTACCAGCAAGTATTTCCCCA[C/G]AGGAAGCAGAGGAGTTTCTCTAAAATTAGGAATAAAACTGCTGTAGCCCTGCTGCGTAGGCCCTGCATACCTGCAAAACTGCAGTGCTTGCTAG	C	G	0.0631424	0.00464763	0.936858	0.00464763	0.00367107	0.00154666	0.118943	0.00154666	0.877386	0.00154666	1362	2	0.111312	0.118943	0.118311	0.0388395	0.843767	1	5	162	1195	0.889598	1	176247938	26205	9	35	126859	mrna-utr	C/G	0.168144	0.236219	YES	2	2	2	1	reference
C20orf44_rs10485509	C20orf44	http://www.ncbi.nlm.nih.gov/entrez/query.fcgi?db=gene&cmd=Retrieve&dopt=full_report&list_uids=55245	rs10485509		http://www.ncbi.nlm.nih.gov/SNP/snp_ref.cgi?rs=10485509	A	C	CTGATGTTTTATTTCTATAATTGGTTAGAGGTATTATTATAAAAGCCCAGGGGCAGTATGCATCTGAGGCAGAGAGGACATTCATTCATTTATAGCCACT[A/C]CTATTATAACAGATAATGTGCTAGGCCAAGAGTTGACTGGGAGTGACATGGTTAACAAATATCCCTCCATAATAAGAATTACAATAGATCGTGGGCTTAA	CTGATGTTTTATTTCTATAATTGGTTAGAGGTATTATTATAAAAGCCCAGGGGCAGTATGCATCTGAGGCAGAGAGGACATTCATTCATTTATAGCCACT[A/C]CTATTATAACAGATAATGTGCTAGGCCAAGAGTTGACTGGGAGTGACATGGTTAACAAATATCCCTCCATAATAAGAATTACAATAGATCGTGGGCTTAA	A	C	0.979075	0.00271298	0.0209251	0.00271298	0.95815	0.000113539	0.0418502	0.000113539			1362	2	0.040135	0.0418502	0.0409745	0.622129	0.430257	1	1305	57	0	0.884588	20	33432353			35	55245	intron	A/C	0.0545026	0.155823	YES	2	2	2	1	reference
C20orf44_rs6060370	C20orf44	http://www.ncbi.nlm.nih.gov/entrez/query.fcgi?db=gene&cmd=Retrieve&dopt=full_report&list_uids=55245	rs6060370		http://www.ncbi.nlm.nih.gov/SNP/snp_ref.cgi?rs=6060370	A	G	TAAAAGAGACGAAAGTTAAATTGCCATGGTAGTTTGATCATCCCAGAACCGTAGTGTACCTCATCAGCTCCTTTTGAAGATGATTGTGGACTTAATATTATGTGTTCTCATGTTTTCTCA[A/G]CTGGACAAATGACTAGAATTTCTGAGGACATACATCTCTTCTCTCTTGGCTATTTTCCAAGCCTGAGGGAAGGACTCCTGTACTTCGTGACTATATAGAAATTAGGGCTGCTGGTTCTGC	GCAGAACCAGCAGCCCTAATTTCTATATAGTCACGAAGTACAGGAGTCCTTCCCTCAGGCTTGGAAAATAGCCAAGAGAGAAGAGATGTATGTCCTCAGAAATTCTAGTCATTTGTCCAG[T/C]TGAGAAAACATGAGAACACATAATATTAAGTCCACAATCATCTTCAAAAGGAGCTGATGAGGTACACTACGGTTCTGGGATGATCAAACTACCATGGCAATTTAACTTTCGTCTCTTTTA	T	C	0.657856	0.00906869	0.342144	0.00906869	0.431718	0.00609249	0.452276	0.00609249	0.116006	0.00609249	1362	2	0.34884	0.452276	0.450163	0.0300124	0.862462	0.9084	588	616	158	0.974513	20	33373166	11223		35	55245	intron	C/T	0.432978	0.17035	YES	2	2	2	1	reference
C20orf44_rs6060375	C20orf44	http://www.ncbi.nlm.nih.gov/entrez/query.fcgi?db=gene&cmd=Retrieve&dopt=full_report&list_uids=55245	rs6060375		http://www.ncbi.nlm.nih.gov/SNP/snp_ref.cgi?rs=6060375	A	G	CAGACATCATCTCATTTAATCCTTACAAATTACCTTGTGATAGAGTTGGGAGTGTCCCCATATTACAACTGAGGAGAACCAAGGAGCAGAAAACTTAAAGGACTTGGCTGTGGCCGCCAT[A/G]GTAAGTCACAAGCCCAGAGCTGACGGATTTCAAAATCTTTGCTCAAAAAAAAAAATTGGCTCTTTTGGCCATAACATGTGCCTTTTGTTGTAATCCAATTTGAACCTTTTTTTTTTGGAA	TTCCAAAAAAAAAAGGTTCAAATTGGATTACAACAAAAGGCACATGTTATGGCCAAAAGAGCCAATTTTTTTTTTTGAGCAAAGATTTTGAAATCCGTCAGCtctgggcttgtgacttac[T/C]atggcggccacagccaagtcctttaagttttctgctccttggttctcctcagttgtaatatggggacactcccaactctatcacaaggtaatttgtaaggattaaatgagatgatgtctg	T	C	0.967327	0.00334822	0.0326725	0.00334822	0.934655	0.000218789	0.0653451	0.000218789			1362	2	0.0612123	0.0653451	0.0632101	1.5538	0.212575	0.3922	1273	89	0	0.806649	20	33384389	15001		35	55245	intron	C/T	0.0644445	0.167539	YES	2	2	2	1	reference
C20orf44_rs6120916	C20orf44	http://www.ncbi.nlm.nih.gov/entrez/query.fcgi?db=gene&cmd=Retrieve&dopt=full_report&list_uids=55245	rs6120916		http://www.ncbi.nlm.nih.gov/SNP/snp_ref.cgi?rs=6120916	C	G	TAAAATATAATTCTTGTATGTTTAGATTATGTGAGGTCTTGATTATTCAGAAAGCCCTCTGGACTGACTAGAGGCAAATGTGGTATAGGGGAAAAGGTCCTAAACTTGGCCCTAACCATA[C/G]GTGTTTGTTCATTTATTTATTCAGCAAGTGTATATTGAGTGCCTACTGTACTTAAGCCCTGGAAATAAAATGTTGACAAAAACCAGATTTGATCTTTATCTTCAGTAGAGCTTACCTTCT	agaaggtaagctctactgaagataaagatcaaatctggtttttgtcaacattttatttccagggcttaagtacagtaggcactcaatatacacttgctgaataaataaatGAACAAACAC[C/G]TATGGTTAGGGCCAAGTTTAGGACCTTTTCCCCTATACCACATTTGCCTCTAGTCAGTCCAGAGGGCTTTCTGAATAATCAAGACCTCACATAATCTAAACATACAAGaattatatttta	C	G	0.000367107	0.000366972	0.999633	0.000366972			0.000734214	2.69436e-07	0.999266	2.69436e-07	1362	2	0.000733676	0.000734214	0.000733945	0.000183688	0.989186	1	0	1	1361	0.81362	20	33399390	82066229		35	55245	intron	C/G	0.059645	0.162065	YES	2	2	2	1	reference
CASP3_rs1049253	CASP3	http://www.ncbi.nlm.nih.gov/entrez/query.fcgi?db=gene&cmd=Retrieve&dopt=full_report&list_uids=836	rs1049253		http://www.ncbi.nlm.nih.gov/SNP/snp_ref.cgi?rs=1049253	A	G	AAAAACTCAAAGACATTGGTAATTTTAAGTTTGAATGTATATTTTGAAATAAAAATGGAAAATAACAAATTTGTACAAAATTGTCACATAGAAACACACTTTAAGATACCATTACATGCT[A/G]TGTGTATTTACAAAAGTTACAGGTCTAGTAAGAAAAAAGAAACTGTCATTGACAAATGCGAGCTCATTTTTTGAGCAACAAGAAATCTCCCGTGAAATGTCATACTGACAGCCAGTGAGA	TCTCACTGGCTGTCAGTATGACATTTCACGGGAGATTTCTTGTTGCTCAAAAAATGAGCTCGCATTTGTCAATGACAGTTTCTTTTTTCTTACTAGACCTGTAACTTTTGTAAATACACA[C/T]AGCATGTAATGGTATCTTAAAGTGTGTTTCTATGTGACAATTTTGTACAAATTTGTTATTTTCCATTTTTATTTCAAAATATACATTCAAACTTAAAATTACCAATGTCTTTGAGTTTTT	C	T	0.806535	0.00749733	0.193465	0.00749733	0.647577	0.00413085	0.317915	0.00413085	0.0345081	0.00413085	1362	2	0.263378	0.317915	0.312073	0.477237	0.489677	0.5332	882	433	47	0.907475	4	185924100	6285	12	35	836	mrna-utr	C/T	0.226544	0.248897	YES	2	2	2	1	reference
CASP3_rs2696056	CASP3	http://www.ncbi.nlm.nih.gov/entrez/query.fcgi?db=gene&cmd=Retrieve&dopt=full_report&list_uids=836	rs2696056		http://www.ncbi.nlm.nih.gov/SNP/snp_ref.cgi?rs=2696056	C	G	ACTGTATGAATGAACATTATGGCTGTTTCCCTTTTAAATTGATGCTATGATAATTCTTTGAATTGGCCTATTAATCATATTAGAGTTAATTTTTAATTAGAGAAGCTGTAGTAGATCTAA[C/G]GTGGGCCAGTACCTATCAGAGTGGTGGTGGAAATGGAAGGAAGCCAGATTACACTGGGAAGATAGCAGGGTTTGTGTCAGATTAATTATAAGGAGTGAGAAGAGAATAGTTGAAAATGGA	TCCATTTTCAACTATTCTCTTCTCACTCCTTATAATTAATCTGACACAAACCCTGCTATCTTCCCAGTGTAATCTGGCTTCCTTCCATTTCCACCACCACTCTGATAGGTACTGGCCCAC[C/G]TTAGATCTACTACAGCTTCTCTAATTAAAAATTAACTCTAATATGATTAATAGGCCAATTCAAAGAATTATCATAGCATCAATTTAAAAGGGAAACAGCCATAATGTTCATTCATACAGT	C	G	0.85011	0.00677101	0.14989	0.00677101	0.720059	0.00331328	0.260103	0.00331328	0.0198384	0.00331328	1361	2	0.222373	0.260103	0.254846	0.579176	0.446635	0.5274	980	354	27	0.828762	4	185792230	-2138	12	35	836	intron	C/G	0.216372	0.247728	YES	2	2	2	1	reference
CASP3_rs2705897	CASP3	http://www.ncbi.nlm.nih.gov/entrez/query.fcgi?db=gene&cmd=Retrieve&dopt=full_report&list_uids=836	rs2705897		http://www.ncbi.nlm.nih.gov/SNP/snp_ref.cgi?rs=2705897	A	C	GTTAGGTTAAGATGACCTCTTAGTTTTAGTCTCAGTTTCTTCATCATGTTCCCATACAGTATATCTGAAGTTGTTGAATAAAGTCATGGATTTTTTTTCCTTTTATTTGCAAATGTCTTT[A/C]CAGTTTCTAAAGAAGATCACAGCAAAAGGAGCAGTTTTGTTTGTGTGCTTCTGAGCCATGGTGAAGAAGGAATAATTTTTGGAACAAATGGACCTGTTGACCTGAAAAAAATAACAAACT	AGTTTGTTATTTTTTTCAGGTCAACAGGTCCATTTGTTCCAAAAATTATTCCTTCTTCACCATGGCTCAGAAGCACACAAACAAAACTGCTCCTTTTGCTGTGATCTTCTTTAGAAACTG[G/T]AAAGACATTTGCAAATAAAAGGAAAAAAAATCCATGACTTTATTCAACAACTTCAGATATACTGTATGGGAACATGATGAAGAAACTGAGACTAAAACTAAGAGGTCATCTTAACCTAAC	G	T	0.264684	0.0083659	0.735316	0.0083659	0.0660793	0.00521086	0.39721	0.00521086	0.536711	0.00521086	1362	2	0.313494	0.39721	0.389253	0.569124	0.450607	0.4852	90	541	731	0.956822	4	185928247	5980	12	35	836	intron	G/T	0.487944	0.076698	YES	2	2	2	1	reference
CASP3_rs3087455	CASP3	http://www.ncbi.nlm.nih.gov/entrez/query.fcgi?db=gene&cmd=Retrieve&dopt=full_report&list_uids=836	rs3087455		http://www.ncbi.nlm.nih.gov/SNP/snp_ref.cgi?rs=3087455	A	C	GCACACAAAACTGGGAGAGAGGGGAGGAAGGAGCTTAGCTTTGTCTTAATAGAAGGGAAGAAATGATGTTTTCCAAGAGACCTTGAAATTGGGGACCTTGGTAAAGGTTTCAGTTTGGGA[A/C]GATAAAAAAGTCCTGGGATGGATTCCAACAGTGTAACTGTACTCAATGCCACTGAGCTGTACGCTTAAGAGTGGTAAATTTTATGTCTATTTCACCACAGTTTTAAAGATTAAAATTTTT	GCACACAAAACTGGGAGAGAGGGGAGGAAGGAGCTTAGCTTTGTCTTAATAGAAGGGAAGAAATGATGTTTTCCAAGAGACCTTGAAATTGGGGACCTTggtaaaggtttcagtttggga[C/A]gataaaaaagtcctgggatggattccaacagtgtaactgtactcaatgccactgagctgtacgcttaagagtggtaaattttatgtctatttcaccacagttTTAAAGATTAAAATTTTT	C	A	0.679515	0.00888243	0.320485	0.00888243	0.458884	0.00587743	0.441263	0.00587743	0.0998532	0.00587743	1362	2	0.340697	0.441263	0.435548	0.234449	0.628244	0.6566	625	601	136	0.846207	4	185798171	6754	12	35	836	mrna-utr	A/C	0.450393	0.149474	YES	2	2	2	1	reference
CASP3_rs4647610	CASP3	http://www.ncbi.nlm.nih.gov/entrez/query.fcgi?db=gene&cmd=Retrieve&dopt=full_report&list_uids=836	rs4647610		http://www.ncbi.nlm.nih.gov/SNP/snp_ref.cgi?rs=4647610	A	G	ATAGAGATAGGGTTTGTCTCTTCCACTGCTTGATACACTCAGGGTCTAGTATAGTACTCTGCACACAGTTGGTGTTCAGTAAATTGTTATGGTGCAAATATCAAATGAATAAATGCTACT[A/G]AATCTGAGTTTTGGCAGTTTCAGTCTTCCTGACAGCAGGATTTCTTCAAGCGGTTTTAAACTTGAATCTGATTCTGCAAAGTAGTCATCCTTGGTGGGAGTGCTGAGGCTTTAAAGTCAT	atagagatagggtttgtctcttccactgcttgatacactcagggtctagtatagtactctgcacacagttggtgttcagtaaattgttatggtgcaaatatcaaatgaataaatGCTACT[A/G]AATCTGAGTTTTGGCAGTTTCAGTCTTCCTGACAGCAGGATTTCTTCAAGCGGTTTTAAACTTGAATCTGATTCTGCAAAGTAGTCATCCTTGGTGGGAGTGCTGAGGCTTTAAAGTCAT	A	G	0.132893	0.00644046	0.867107	0.00644046	0.0154185	0.00297627	0.234949	0.00297627	0.749633	0.00297627	1362	2	0.203908	0.234949	0.230465	0.515582	0.472732	0.549	21	320	1021	0.890454	4	185943080	-4216	12	35	836	mrna-utr	A/G	0.42	0.183303	YES	2	2	2	1	reference
CASP3_rs4647620	CASP3	http://www.ncbi.nlm.nih.gov/entrez/query.fcgi?db=gene&cmd=Retrieve&dopt=full_report&list_uids=836	rs4647620		http://www.ncbi.nlm.nih.gov/SNP/snp_ref.cgi?rs=4647620	C	G	GTGAACTTGATTGTGAACGATGGCGTTTGGGTGATGATGACGTGTCAGTGTAGGTTCCTTTGTAAGAATGTACTACTCTGGTGCAGGATGTTGATAATGGGGGAGACTACGCACGTGTTG[C/G]GGGGCAGGTGGGATACAGGATGTCTCTGTACGTTCTTCTCAATTTTGGTTTGAACCTAAAACTGCTCTAAAAAATGAAGTCTAATTTAAAAACTGGGAAATAAGACTTAATAACTTCGGA	TCCGAAGTTATTAAGTCTTATTTCCCAGTTTTTAAATtagacttcattttttagagcagttttaggttcaaaccaaaattgagaagaacgtacagagacatcctgtatcccacctgcccc[C/G]caacacgtgcgtagtctcccccattatcaacatcctgcaccagagtagtacattcttacaaaggaacctacactgacacgtcatcatcacccaaacgccatcgttcacaatcaagttcac	C	G	0.000367107	0.000366972	0.999633	0.000366972			0.000734214	2.69436e-07	0.999266	2.69436e-07	1362	2	0.000733676	0.000734214	0.000733945	0.000183688	0.989186	1	0	1	1361	0.771347	4	185800709	5557	12	35	836	mrna-utr	C/G	0.074753	0.178293	YES	2	2	2	1	reference
CASP7_rs11814042	CASP7	http://www.ncbi.nlm.nih.gov/entrez/query.fcgi?db=gene&cmd=Retrieve&dopt=full_report&list_uids=840	rs11814042	rs9804243	http://www.ncbi.nlm.nih.gov/SNP/snp_ref.cgi?rs9804243	A	G	TCTGGTAGTGGCAAATTCCTTCAGCATGTGCTTGTCTGAGAAAGACTATATCCCCTTCATTTATGAAACTTAGTTTTGCTGTATACAACGTTTTTGGCTGAGAGTTATTCTGTTTAAGGA[A/G]GCTAAAAATAGGGCCCCAATCCTTTCTGGCTTATAAGGTTTCTGCTGAGAAGTCTACTGTTAGTCTGATAGCTTTTCCTTTGCAGGTTATCTGATACTTCTGTCTTACTGCTCTTAGAAT	tctggtagtggcaaattccttcagcatgtgcttgtctgagaaagactatatccccttcatttatgaaacttagttttgctgtatacaacgtttttggctgagagttattctgtttaagga[G/A]gctaaaaatagggccccaatcctttctggcttataaggtttctgctgagaagtctactgttagtctgatagcttttcctttgcaggttatctgatacttctgtcttactgctcttagaat	G	A	0.131057	0.00656111	0.868943	0.00656111	0.020558	0.0032963	0.220999	0.0032963	0.758443	0.0032963	1362	2	0.201825	0.220999	0.227763	1.20121	0.27308	0.2788	28	301	1033	0.845974	10	115439466	2305		35	840	mrna-utr	A/G			YES	2	2	2	1	reference
CASP7_rs12358524	CASP7	http://www.ncbi.nlm.nih.gov/entrez/query.fcgi?db=gene&cmd=Retrieve&dopt=full_report&list_uids=840	rs12358524		http://www.ncbi.nlm.nih.gov/SNP/snp_ref.cgi?rs=12358524	A	G	TTAACACAAAGGACAGAAACTTTGGGAAGCTCTATGGCCTCACGCATTGTCTGAGACACCAGAGTACCTCACCTGGGTAACATAAGAAGCACAAATCCCACTGCTACCACCGCAGCTGGT[A/G]TTCTTTTCCAAGTGCCACTTCCTGCCTGGAGGCCAACCAACACAGTCCATTACAGCATCTGCTGGCAGAATAACATAGCACCCAGGAAGGAGAAAACTTACGCATGACCCCATCTGTCAC	gtgacagatggggtcatgcgtaagttttctccttcctgggtgctatgttattctgccagcagatgctgtaatggactgtgttggttggcctccaggcaggaagtggcacttggaaaagaa[C/T]accagctgcggtggtagcagtgggatttgtgcttcttatgttacccaggtgaggtactctggtgtctcagacaatgcgtgaggccatagagcttcccaaagtttctgtcctttgtgttaa	C	T	0.106828	0.00590605	0.893172	0.00590605	0.0110132	0.00255013	0.19163	0.00255013	0.797357	0.00255013	1362	2	0.172623	0.19163	0.190832	0.0238223	0.877338	1	15	261	1086	0.874898	10	115441771	19992		35	840	mrna-utr	C/T			NO	2	2	2	1	reference
CASP7_rs3124738	CASP7	http://www.ncbi.nlm.nih.gov/entrez/query.fcgi?db=gene&cmd=Retrieve&dopt=full_report&list_uids=840	rs3124738		http://www.ncbi.nlm.nih.gov/SNP/snp_ref.cgi?rs=3124738	A	G	GGACAGGCTTGTCATCGTGACCCTCAAGCTTCAGAGGGTCCGAGATGCTCAGACCCTCTGCTGCTGCCATTGATCAGCATGTTGCTTTTGTTCTGTGCTTAACACTACTTATTGGAGATC[A/G]TCCCAGGAGAACGCCCACACCTGACCTGAGACTCATTCTGTAGGTCTAGAGCAAAGCATAGGATTCCGAATTTTAACAAAGTTGAGAAACTCTGGAATAGGAGACTTGGGGTTACACCTT	aaggtgtaaccccaagtcTCCTATTCCAGAGTTTCTCAACTTTGTTAAAATTCGGAATCCTATGCTTTGCTCTAGACCTACAGAATGAGTCTCAGGTCAGGTGTGGGCGTTCTCCTGGGA[C/T]GATCTCCAATAAGTAGTGTTAAGCACAGAACAAAAGCAACATGCTGATCAATGGCAGCAGCAGAGGGTCTGAGCATCTCGGACCCTCTGAAGCTTGAGGGTCACGATGACAAGCCTGTCC	C	T	0.0966912	0.00555306	0.903309	0.00555306	0.00588235	0.00198542	0.181618	0.00198542	0.8125	0.00198542	1360	2	0.159427	0.181618	0.174684	2.14268	0.143251	0.1627	8	247	1105	0.692273	10	115461763	-7602		35	840	intron	C/T	0.138045	0.223531	YES	2	2	2	1	reference
CASP7_rs3124743	CASP7	http://www.ncbi.nlm.nih.gov/entrez/query.fcgi?db=gene&cmd=Retrieve&dopt=full_report&list_uids=840	rs3124743		http://www.ncbi.nlm.nih.gov/SNP/snp_ref.cgi?rs=3124743	A	G	TGGAACAGCCCAGTGTGGTCCCACGTACCCCCATTACTAGTGACATACTTCCCCTTTATCAGACTCATGTATAAGTAAGAAGCCCACCACAGTGCCTGATTCAAGGAGACTCACAGATAC[A/G]TCTTGTTTGTCTCTTTGTGGATGACCTGGAGGTTTCATCACCCTGTAAGTGAGGTTCAGGGTGGGTGAGAAAGTCTGCCCTTCTTTTACACAGTGGGAGATGGGAGAATGGGCAAGGGAA	TTCCCTTGCCCATTCTCCCATCTCCCACTGTGTAAAAGAAGGGCAGACTTTCTCACCCACCCTGAACCTCACTTACAGGGTGATGAAACCTCCAGGTCATCCACAAAGAGACAAACAAGA[C/T]GTATCTGTGAGTCTCCTTGAATCAGGCACTGTGGTGGGCTTCTTACTTATACATGAGTCTGATAAAGGGGAAGTATGTCACTAGTAATGGGGGTACGTGGGACCACACTGGGCTGTTCCA	C	T	0.480176	0.00958606	0.519824	0.00958606	0.231278	0.00676348	0.497797	0.00676348	0.270925	0.00676348	1362	2	0.374607	0.497797	0.499214	0.0109685	0.91659	0.9158	315	678	369	0.968116	10	115454161	16847		35	840	intron	C/T	0.49977	0.0107116	YES	2	2	2	1	reference
CASP7_rs6421366	CASP7	http://www.ncbi.nlm.nih.gov/entrez/query.fcgi?db=gene&cmd=Retrieve&dopt=full_report&list_uids=840	rs6421366	rs4342983	http://www.ncbi.nlm.nih.gov/SNP/snp_ref.cgi?rs4342983	C	G	ATAGCTTATTGTAACCTAATTTGGCTCTGGGTGCTTTTGGCGGTGAAGACTCTGTATAAGTTCCTTGGTTATAGAGAGTCTTTGTATGATGGTTTTCTCAGATGTAGTAGCAATGTGCTT[C/G]GTGTGTGAGCAGGTTGACTGTCTCTTGTGGGGTTGGAATGGCAAAAGTCTCTGAAGCTCATCCCCAGTGGTGTGCACTTATTTATTTATTCATTTGTTCATTCATTCATTCATTCATTCC	atagcttattgtaacctaatttggctctgggtgcttttggcggtgaagactctgtataagttccttggttatagagagtctttgtatgatggttttctcagatgtagtagcaatgtgctt[C/G]gtgtgtgagcaggttgactgtctcttgtggggttggaatggcaaaagtctctgaagctcatccccagtggtgtgcacttatttatttattcatttgttcattcattcattcattcattcc	C	G	0.0873715	0.00537547	0.912628	0.00537547	0.00660793	0.00203825	0.161527	0.00203825	0.831865	0.00203825	1362	2	0.146759	0.161527	0.159475	0.225434	0.634931	0.7284	9	220	1133	0.668917	10	115440504	36096		35	840	mrna-utr	C/G	0.0736247	0.177177	YES	1	1	1	1	reference
CASP7_rs6585241	CASP7	http://www.ncbi.nlm.nih.gov/entrez/query.fcgi?db=gene&cmd=Retrieve&dopt=full_report&list_uids=840	rs6585241		http://www.ncbi.nlm.nih.gov/SNP/snp_ref.cgi?rs=6585241	A	G	CTTTGCATCTCTCTGACCCTTCTGTCGTTTACCGTGCTCTCTTTCTGACCACAGCTGAGAAAGGACACCTGTGATTAGATGGAACCCACCTGGATGCTCCAGGATCATCTCCCCATGTCA[A/G]TCCGATACCCTTAACCACATCTGCAAAGTCCTTTCTTCCACATAAGGTTTCATGTTCATAGGTTCCAGGGTTAGGGCGTGGACATCTTTGGGCACCATTATTCTGCCTACCACAGAAATG	ctttgcatctctctgacccttctgtcgtttaccgtgctctctttctgaccacagctgagaaaggacacctgtgattagatggaacccacctggatgctccaggatcatctccccatgtca[G/A]tccgatacccttaaccacatctgcaaagtcctttcttccacataaggtttcatgttcataggttccagggttagggcgtggacatctttgggcaccattattctgcctaccacaGAAATG	G	A	0.814244	0.00748768	0.185756	0.00748768	0.664464	0.00414989	0.299559	0.00414989	0.0359765	0.00414989	1362	2	0.256748	0.299559	0.302502	0.128849	0.719629	0.719	905	408	49	0.784863	10	115476600			35	840	intron	A/G	0.249273	0.249999	YES	2	2	2	1	reference
CAT_rs17883866	CAT	http://www.ncbi.nlm.nih.gov/entrez/query.fcgi?db=gene&cmd=Retrieve&dopt=full_report&list_uids=847	rs17883866	rs4756146	http://www.ncbi.nlm.nih.gov/SNP/snp_ref.cgi?rs4756146	A	G	TGATTGAACTTAAAATATGGGCTATGAATTAATAATTTAAAAGCAATTCA[A/G]TTTTTAAAAAGACAGAAAATTTGAACATATACTTCAAAGGAATATATACC	GGTATATATTCCTTTGAAGTATATGTTCAAATTTTCTGTCTTTTTAAAAA[C/T]TGAATTGCTTTTAAATTATTAATTCATAGCCCATATTTTAAGTTCAATCA	C	T	0.871512	0.0064642	0.128488	0.0064642	0.76138	0.00315473	0.220264	0.00315473	0.0183554	0.00315473	1362	2	0.198879	0.220264	0.223957	0.370272	0.542856	0.5476	1037	300	25	0.93046	11	34420315	57960		35.1	847	intron	C/T			YES
CAT_rs17884049	CAT	http://www.ncbi.nlm.nih.gov/entrez/query.fcgi?db=gene&cmd=Retrieve&dopt=full_report&list_uids=847	rs17884049	rs10488736	http://www.ncbi.nlm.nih.gov/SNP/snp_ref.cgi?rs10488736	A	G	GTATCTGTAGTTATTCAGAAGCCAATATTTCTTAAGCAAGACATATTAATAGTGATATTTTGCTAGATTATTGGGTTGACCTCTAAAATAAATATCCATAAATTAAAATGAAAAATAGGA[A/G]CTTAGTATCAGATATGTGAATCCGAGCAGCCTCTGCCCCATTCTGAAATCAAAAGGTTGTAGCTATGATTTTATTCTTACATTTCATTCATTCATTCCACTCATTCAACAAATATTGAGT	ACTCAATATTTGTTGAATGAGTGGAATGAATGAATGAAATGTAAGAATAAAATCATAGCTACAACCTTTTGATTTCAGAATGGGGCAGAGGCTGCTCGGATTCACATATCTGATACTAAG[C/T]TCCTATTTTTCATTTTAATTTATGGATATTTATTTTAGAGGTCAACCCAATAATCTAGCAAAATATCACTATTAATATGTCTTGCTTAAGAAATATTGGCTTCTGAATAACTACAGATAC	C	T	0.317548	0.00885362	0.682452	0.00885362	0.0976505	0.00584487	0.439794	0.00584487	0.462555	0.00584487	1362	2	0.339495	0.439794	0.433422	0.294386	0.587423	0.6125	133	599	630	0.897261	11	34445828			35	847	intron	C/T			YES	2	2	2	1	reference
CAT_rs17884132	CAT	http://www.ncbi.nlm.nih.gov/entrez/query.fcgi?db=gene&cmd=Retrieve&dopt=full_report&list_uids=847	rs17884132	rs769214	http://www.ncbi.nlm.nih.gov/SNP/snp_ref.cgi?rs769214	A	G	ATTACAATGACAAACTAGTCAGTAACTTACTAAATATTGTACTATATATTACTAAGTATTTTACTCTTCAACATAGCTTTTTAAAGACACAAAGCTTTTCAAAATTCCTGCTTACCTGGG[A/G]GTAAAATTTGGGGAAGCAGATTTCTCCAGTGTTTAAAGAAGCCAATTTGGCAGTGTACCAGAGTTGAATACATTTTTCCCATCACAAGGGAATACATTTTTCCCATCTAAGTTAAGTTGT	ATTACAATGACAAACTAGTCAGTAACTTACTAAATATTGTACTATATATTACTAAGTATTTTACTCTTCAACATAGCTTTTTAAAGACACAAAGCTTTTCAAAATTCCTGCTTACCTGGG[A/G]GTAAAATTTGGGGAAGCAGATTTCTCCAGTGTTTAAAGAAGCCAATTTGGCAGTGTACCAGAGTTGAATACATTTTTCCCATCACAAGGGAATACATTTTTCCCATCTAAGTTAAGTTGT	A	G	0.671932	0.00918495	0.328068	0.00918495	0.460691	0.00603665	0.422483	0.00603665	0.116826	0.00603665	1361	2	0.343692	0.422483	0.440878	2.36931	0.123742	0.1251	627	575	159	0.943212	11	34416293	10058		35	847	locus-region	A/G			YES	2	2	2	1	reference
CAT_rs17886184	CAT	http://www.ncbi.nlm.nih.gov/entrez/query.fcgi?db=gene&cmd=Retrieve&dopt=full_report&list_uids=847	rs17886184	rs1408036	http://www.ncbi.nlm.nih.gov/SNP/snp_ref.cgi?rs1408036	A	C	GCCTACTCCCCACCGTATTGCCTTCTAGAGAAGAGGCAGGAATTTATTTTAATGTACAGGACAGACATGCATGGGGAGTAAAACTACAGACTCCACTCTAGGTGTGTGGAAATACTAAAA[A/C]TAGTGCTTTTCTCTGTGTGTGAAGTTGGTCTGTTGAGTTTTGTCATAGACAGCGTTGAGTTCCTCTCCCAGGTGGAGGTGGCGTAGCTTTGCGTCACTTACGTGTCTCTCCTGATTTCCA	GCCTACTCCCCACCGTATTGCCTTCTAGAGAAGAGGCAGGAATTTATTTTAATGTACAGGACAGACATGCATGGGGAGTAAAACTACAGACTCCACTCTAGGTGTGTGGAAATACTAAAA[A/C]TAGTGCTTTTCTCTGTGTGTGAAGTTGGTCTGTTGAGTTTTGTCATAGACAGCGTTGAGTTCCTCTCCCAGGTGGAGGTGGCGTAGCTTTGCGTCACTTACGTGTCTCTCCTGATTTCCA	A	C	0.907489	0.00546206	0.092511	0.00546206	0.820852	0.00196478	0.173275	0.00196478	0.00587372	0.00196478	1362	2	0.153809	0.173275	0.167905	1.3927	0.23795	0.3366	1118	236	8	0.820706	11	34426351	13537281		35	847	intron	A/C			YES	2	2	2	1	reference
CETP_rs17231576	CETP	http://www.ncbi.nlm.nih.gov/entrez/query.fcgi?db=gene&cmd=Retrieve&dopt=full_report&list_uids=1071	rs17231576	rs708273	http://www.ncbi.nlm.nih.gov/SNP/snp_ref.cgi?rs708273	A	G	CACCTACTATCTTCCAAACTCCCACCCTCCATCTGGTGTCACCTCCTCCC[A/G]GAAGCCCTCTGTATCAGTTTCCTGTTTTCTGCCATAAAAAAAATCACTCC	CACCTACTATCTTCCAAACTCCCACCCTCCATCTGGTGTCACCTCCTCCC[A/G]GAAGCCCTCTGTATCAGTTTCCTGTTTTCTGCCATAAAAAAAATCACTCC	A	G	0.298825	0.00868356	0.701175	0.00868356	0.0851689	0.00563299	0.427313	0.00563299	0.487518	0.00563299	1362	2	0.331253	0.427313	0.419057	0.528566	0.467211	0.5204	116	582	664	0.835414	16	55557450	9438		35.1	1071	intron	A/G	0.363378	0.222813	YES					reference
CETP_rs17231751	CETP	http://www.ncbi.nlm.nih.gov/entrez/query.fcgi?db=gene&cmd=Retrieve&dopt=full_report&list_uids=1071	rs17231751	rs289717	http://www.ncbi.nlm.nih.gov/SNP/snp_ref.cgi?rs289717	A	G	ATTGCCCCCAAAGATAAGGCTCCATTCCCTGCTCCATTACCCAGGCATAG[A/G]GACTTGTAGGGGGCTGGAACCCCAGGATCAACTCTGGGCTCAGAGGGCCC	ATTGCCCCCAAAGATAAGGCTCCATTCCCTGCTCCATTACCCAGGCATAG[A/G]GACTTGTAGGGGGCTGGAACCCCAGGATCAACTCTGGGCTCAGAGGGCCC	A	G	0.346549	0.00904988	0.653451	0.00904988	0.11674	0.00611644	0.459618	0.00611644	0.423642	0.00611644	1362	2	0.350344	0.459618	0.452906	0.299179	0.584397	0.6358	159	626	577	0.819733	16	55566889	596		35.1	1071	intron	A/G	0.391833	0.205872	YES					reference
CETP_rs17231813	CETP	http://www.ncbi.nlm.nih.gov/entrez/query.fcgi?db=gene&cmd=Retrieve&dopt=full_report&list_uids=1071	rs17231813	rs12720898	http://www.ncbi.nlm.nih.gov/SNP/snp_ref.cgi?rs12720898	A	G	GGAATGCGCAGGCAGCCAGCGGGGCTGGGGAGTGTGGCCTGAGGACCTTC[A/G]ATTACAGCCTGTGGGACTGGGCTCAAGGAGATCACATGCCCCAAGAAACC	GGTTTCTTGGGGCATGTGATCTCCTTGAGCCCAGTCCCACAGGCTGTAAT[C/T]GAAGGTCCTCAGGCCACACTCCCCAGCCCCGCTGGCTGCCTGCGCATTCC	C	T	0.0675477	0.00483053	0.932452	0.00483053	0.0051395	0.00179702	0.124816	0.00179702	0.870044	0.00179702	1362	2	0.118036	0.124816	0.12597	0.114225	0.735384	0.6626	7	170	1185	0.91535	16	55568744	4839		35.1	1071	intron	C/T	0.117188	0.211804	YES					reference
CETP_rs17231896	CETP	http://www.ncbi.nlm.nih.gov/entrez/query.fcgi?db=gene&cmd=Retrieve&dopt=full_report&list_uids=1071	rs17231896	rs5882	http://www.ncbi.nlm.nih.gov/SNP/snp_ref.cgi?rs5882	A	G	CCAGGGAGGACTCACCATGGGCATTTGATTGGCAGAGCAGCTCCGAGTCC[A/G]TCCAGAGCTTCCTGCAGTCAATGATCACCGCTGTGGGCATCCCTGAGGTC	CCAGGGAGGACTCACCATGGGCATTTGATTGGCAGAGCAGCTCCGAGTCC[A/G]TCCAGAGCTTCCTGCAGTCAATGATCACCGCTGTGGGCATCCCTGAGGTC	A	G	0.695668	0.00887472	0.304332	0.00887472	0.486784	0.00576384	0.417768	0.00576384	0.0954479	0.00576384	1362	2	0.333782	0.417768	0.423428	0.243359	0.621791	0.6097	663	569	130	0.886118	16	55573593	-19919		35.1	1071	nonsynonymous	A/G	0.499055	0.0217186	YES					reference
CETP_rs17237890	CETP	http://www.ncbi.nlm.nih.gov/entrez/query.fcgi?db=gene&cmd=Retrieve&dopt=full_report&list_uids=1071	rs17237890	rs3816117	http://www.ncbi.nlm.nih.gov/SNP/snp_ref.cgi?rs3816117	A	G	CAAAGAACTTGACCTTGAAGGCGAGGTCAGGAGGGGGTGATGACAGCTCC[A/G]CTCAGCCCATCTCCCTCCCAGGGCACTCCTCTCTCTGGGCTAGTGTGGCA	TGCCACACTAGCCCAGAGAGAGGAGTGCCCTGGGAGGGAGATGGGCTGAG[C/T]GGAGCTGTCATCACCCCCTCCTGACCTCGCCTTCAAGGTCAAGTTCTTTG	C	T	0.53125	0.00959895	0.46875	0.00959895	0.283824	0.0067528	0.494853	0.0067528	0.221324	0.0067528	1360	2	0.374022	0.494853	0.498047	0.0559307	0.813047	0.8261	386	673	301	0.891167	16	55553659	7598541		35.1	1071	intron	C/T	0.499753	0.0111077	YES					reference
CETP_rs17237974	CETP	http://www.ncbi.nlm.nih.gov/entrez/query.fcgi?db=gene&cmd=Retrieve&dopt=full_report&list_uids=1071	rs17237974	rs12720922	http://www.ncbi.nlm.nih.gov/SNP/snp_ref.cgi?rs12720922	A	G	GTTTTCACTTACTCTCTAATGTCTCAGGTAGTGTTTATTGTATTCTGTGC[A/G]GAGGTCAAGAATTTAGTCATCCAAGGAGGTTAGTGTATTAGGAGCTTACG	GTTTTCACTTACTCTCTAATGTCTCAGGTAGTGTTTATTGTATTCTGTGC[A/G]GAGGTCAAGAATTTAGTCATCCAAGGAGGTTAGTGTATTAGGAGCTTACG	A	G	0.193465	0.00758667	0.806535	0.00758667	0.0381791	0.00425239	0.310573	0.00425239	0.651248	0.00425239	1362	2	0.263378	0.310573	0.312073	0.0314875	0.859157	0.8575	52	423	887	0.899056	16	55558386			35.1	1071	intron	A/G	0.297521	0.245442	YES					reference
CETP_rs17238079	CETP	http://www.ncbi.nlm.nih.gov/entrez/query.fcgi?db=gene&cmd=Retrieve&dopt=full_report&list_uids=1071	rs17238079	rs11076176	http://www.ncbi.nlm.nih.gov/SNP/snp_ref.cgi?rs11076176	A	C	TCCCCATGCGTGTGCACACACACACATACCACATGCCATCTGGATCCCCT[A/C]GCAGCCCAGCCCCACCCACTCACCTTGAACTCGTCTCCCATCAGGCTGAG	CTCAGCCTGATGGGAGACGAGTTCAAGGTGAGTGGGTGGGGCTGGGCTGC[G/T]AGGGGATCCAGATGGCATGTGGTATGTGTGTGTGTGCACACGCATGGGGA	G	T	0.827333	0.00713972	0.172667	0.00713972	0.680382	0.0037002	0.293902	0.0037002	0.0257164	0.0037002	1361	2	0.244892	0.293902	0.285706	1.11977	0.289968	0.3481	926	400	35	0.51561	16	55564947	2322		35.1	1071	intron	G/T	0.400181	0.199864	YES					reference
CETP_rs17238135	CETP	http://www.ncbi.nlm.nih.gov/entrez/query.fcgi?db=gene&cmd=Retrieve&dopt=full_report&list_uids=1071	rs17238135	rs736274	http://www.ncbi.nlm.nih.gov/SNP/snp_ref.cgi?rs736274	A	T	GCGACTGGGAGCAGCGACGTGGGGGGGAAGTTCTGTTGGTGGCTCTGCTC[A/T]GCTCTCTGGTAAGCAGGTTGTGTGTGGAGAGGGAAGTGGAAGGTAGACAG	CTGTCTACCTTCCACTTCCCTCTCCACACACAACCTGCTTACCAGAGAGC[A/T]GAGCAGAGCCACCAACAGAACTTCCCCCCCACGTCGCTGCTCCCAGTCGC	A	T	0.890969	0.00603482	0.109031	0.00603482	0.795888	0.00280202	0.190162	0.00280202	0.0139501	0.00280202	1362	2	0.175413	0.190162	0.194286	0.613872	0.433334	0.4075	1084	259	19	0.886071	16	55567270	7883		35.1	1071	intron	A/T	0.209751	0.246739	YES					reference
CETP_rs17238302	CETP	http://www.ncbi.nlm.nih.gov/entrez/query.fcgi?db=gene&cmd=Retrieve&dopt=full_report&list_uids=1071	rs17238302	rs1801706	http://www.ncbi.nlm.nih.gov/SNP/snp_ref.cgi?rs1801706	A	G	CAGAAGGCAAGCACCAGGCTCACAGCTGGAACCCTGGTGTCTCCTCCAGC[A/G]TGGTGGAAGTTGGGTTAGGAGTACGGAGATGGAGATTGGCTCCCAACTCC	CAGAAGGCAAGCACCAGGCTCACAGCTGGAACCCTGGTGTCTCCTCCAGC[A/G]TGGTGGAAGTTGGGTTAGGAGTACGGAGATGGAGATTGGCTCCCAACTCC	A	G	0.1663	0.00725288	0.8337	0.00725288	0.0323054	0.00395196	0.267988	0.00395196	0.699706	0.00395196	1362	2	0.238844	0.267988	0.277288	1.532	0.215812	0.2102	44	365	953	0.958362	16	55575163			35.1	1071	untranslated	A/G	0.206655	0.246214	YES					reference
CETP_rs17245715	CETP	http://www.ncbi.nlm.nih.gov/entrez/query.fcgi?db=gene&cmd=Retrieve&dopt=full_report&list_uids=1071	rs17245715		http://www.ncbi.nlm.nih.gov/SNP/snp_ref.cgi?rs=17245715	A	G	TGGCCAAGTGCTGCCTCCTCAGAGCCCCTAGGAAGGAGCCAGGGCTGCAG[A/G]GATGTGGGCAGGATGCTGTGCCCCGGGCAGGGCCAAGGAAACATGAGTCG	CGACTCATGTTTCCTTGGCCCTGCCCGGGGCACAGCATCCTGCCCACATC[C/T]CTGCAGCCCTGGCTCCTTCCTAGGGGCTCTGAGGAGGCAGCACTTGGCCA	C	T	0.082232	0.00530924	0.917768	0.00530924	0.00807636	0.00220324	0.148311	0.00220324	0.843612	0.00220324	1362	2	0.139548	0.148311	0.15094	0.413037	0.520432	0.4745	11	202	1149	0.810775	16	55552491	12359		35.1	1071	locus	C/T	0.244898	0.249948	YES					reference
CNDP1_rs11876996	CNDP1	http://www.ncbi.nlm.nih.gov/entrez/query.fcgi?db=gene&cmd=Retrieve&dopt=full_report&list_uids=84735	rs11876996		http://www.ncbi.nlm.nih.gov/SNP/snp_ref.cgi?rs=11876996	A	G	CAACATGCTTCTTCCCCCATTTGGTTTTGATCTTTTTATATCTTTATAATTTATAACTTCATATCTTTGAGAACCACATTAAGAGGAGAGGTCAAAGTCTTTTCCTAGAGCACAGGATGC[A/G]TGCAGAACTCTAAAAGTGATTACAAGCAGATAAACGACACCGCACACACTGTAATCAGTTCTAATAAGTGGGCTTGACTCACCACAGATTAACAAATGCAACATGAGCACGGGATTATGT	ACATAATCCCGTGCTCATGTTGCATTTGTTAATCTGTGGTGAGTCAAGCCCACTTATTAGAACTGATTACAGTGTGTGCGGTGTCGTTTATCTGCTTGTAATCACTTTTAGAGTTCTGCA[T/C]GCATCCTGTGCTCTAGGAAAAGACTTTGACCTCTCCTCTTAATGTGGTTCTCAAAGATATGAAGTTATAAATTATAAAGATATAAAAAGATCAAAACCAAATGGGGGAAGAAGCATGTTG	T	C	0.735683	0.00841455	0.264317	0.00841455	0.539648	0.00524427	0.39207	0.00524427	0.0682819	0.00524427	1362	2	0.313283	0.39207	0.388907	0.0901067	0.764042	0.8331	735	534	93	0.855866	18	70382460	-3697		35	84735	intron	C/T	0.424218	0.179299	YES	2	2	2	1	reference
CNDP1_rs1559809	CNDP1	http://www.ncbi.nlm.nih.gov/entrez/query.fcgi?db=gene&cmd=Retrieve&dopt=full_report&list_uids=84735	rs1559809		http://www.ncbi.nlm.nih.gov/SNP/snp_ref.cgi?rs=1559809	A	G	CTGGGTGTGGCATCTCACACTTGAAATCCTAGCACTTTAGGAGGCTAAGGCGGGCGGATTAGTTGAGCCTGCCCAGCTGGTCAGCCTGGGCAACATGGCAAACCTATCTCTACCAAAAAT[A/G]CAAAAAGGTAGCCGGACATGGTGGTGCACGTCTGTAGTCTCAGCTACTTATGAGGAGGCTGAGATGGGAGAATCACTTGAGCCTGGGAGTGTGCCACTGCGCTCCAGCCTGGGCGACAGG	ctgggtgtggcatctcacacttgaaatcctagcactttaggaggctaaggcgggcggattagttgagcctgcccagctggtcagcctgggcaacatggcaaacctatctctaccaaaaat[A/G]caaaaaggtagccggacatggtggtgcacgtctgtagtctcagctacttatgaggaggctgagatgggagaatcacttgagcctgggagtgtgccactgcgctccagcctgggcgacagg	A	G	0.783774	0.00782451	0.216226	0.00782451	0.611601	0.00452141	0.344347	0.00452141	0.0440529	0.00452141	1362	2	0.281503	0.344347	0.338945	0.345931	0.556426	0.6274	833	469	60	0.837807	18	70378763	-17704		35	84735	intron	A/G	0.357778	0.225575	YES	2	2	2	1	reference
CNDP1_rs2346064	CNDP1	http://www.ncbi.nlm.nih.gov/entrez/query.fcgi?db=gene&cmd=Retrieve&dopt=full_report&list_uids=84735	rs2346064		http://www.ncbi.nlm.nih.gov/SNP/snp_ref.cgi?rs=2346064	A	G	CGGGAACAATGCGCCTTCAGACACTTTTACTCCCCACAGTCTGGACAGGGATCTGAGCCTCGCCAGACATCAGCCAGAGAGACAGCACAGCACCACTTTGCACTACTTCCGGAACCTTCC[A/G]TCATCTAGAAACGTAACAGTGGCTTGTAGCACAATGACAGAGCCAGTCAAACAACAATGACCAAAAAGAGTGAATGAAATAACCAGTGATTTCAGTTATTTCTCCAACAGGCCAGAATCT	AGATTCTGGCCTGTTGGAGAAATAACTGAAATCACTGGTTATTTCATTCACTCTTTTTGGTCATTGTTGTTTGACTGGCTCTGTCATTGTGCTACAAGCCACTGTTACGTTTCTAGATGA[C/T]GGAAGGTTCCGGAAGTAGTGCAAAGTGGTGCTGTGCTGTCTCTCTGGCTGATGTCTGGCGAGGCTCAGATCCCTGTCCAGACTGTGGGGAGTAAAAGTGTCTGAAGGCGCATTGTTCCCG	C	T	0.694567	0.00879342	0.305433	0.00879342	0.48091	0.00573354	0.427313	0.00573354	0.0917768	0.00573354	1362	2	0.334278	0.427313	0.424288	0.0692442	0.79244	0.851	655	582	125	0.896696	18	70364396	23058		35	84735	intron	C/T	0.421217	0.182167	YES	2	2	2	1	reference
CNDP1_rs4892242	CNDP1	http://www.ncbi.nlm.nih.gov/entrez/query.fcgi?db=gene&cmd=Retrieve&dopt=full_report&list_uids=84735	rs4892242		http://www.ncbi.nlm.nih.gov/SNP/snp_ref.cgi?rs=4892242	A	T	GCTGTCATCAGAATGTGAGACAGCCAGCTCAAGCTTTCGAAGTGAGACCGTCCACACTCCAGAGTAATTTAGCTAGCATTATTGCCTAGTGAACGGAAAGTCTTAATGCTAAAGTGACCA[A/T]ACCGAAGATTGCTCTGGTGCCACATTGAAGATGAAGAGGAACAGAGAAAGACCAGCTGGGCAGGAAGGATGGGAGGGAATGAACTGAAGAATCAACTTCAAAAAAGCCCAACCTGTAGAA	GCTGTCATCAGAATGTGAGACAGCCAGCTCAAGCTTTCGAAGTGAGACCGTCCACACTCCAGAGTAATTTAGCTAGCATTATTGCCTAGTGAACGGAAAGTCTTAATGCTAAAGTGACCA[T/A]ACCGAAGATTGCTCTGGTGCCACATTGAAGATGAAGAGGAACAGAGAAAGACCAGCTGGGCAGGAAGGATGGGAGGGAATGAACTGAAGAATCAACTTCAAAAAAGCCCAACCTGTAGAA	T	A	0.921072	0.00520543	0.078928	0.00520543	0.849486	0.00211158	0.143172	0.00211158	0.00734214	0.00211158	1362	2	0.134827	0.143172	0.145397	0.318958	0.572235	0.5792	1157	195	10	0.918714	18	70387454	1575		35	84735	intron	A/T	0.177475	0.239249	YES	2	2	2	1	reference
CNDP1_rs4892243	CNDP1	http://www.ncbi.nlm.nih.gov/entrez/query.fcgi?db=gene&cmd=Retrieve&dopt=full_report&list_uids=84735	rs4892243		http://www.ncbi.nlm.nih.gov/SNP/snp_ref.cgi?rs=4892243	A	G	TCTAGCCAAGATCACCAGGCTCTCCTTGGCCAAATGATTGATGTTTACACAGCTGTCTTCCTTTTGGTTTCATCCCATATTGTTGATCACTCCTCTTTCTGGAAAAATTCTCTTCCCTTG[A/G]TTTCTGAGAAGCTTTCTTCTCTTTCTTCTTTTCTTACCTGCAGGACAATTCTATTGATACCTCCTGTAATAACATCTCTTCTTCCTCCACCTCTAAAGCTTAATACTTGGCTCATCCTTC	GAAGGATGAGCCAAGTAttaAGCtttagaggtggaggaagaagagatgttattacaggaggtatcaatagaattgtcctgcaggtaagaaaagaagaaagagaagaaagcttctcagaaa[T/C]caagggaagagaatttttccagaaagaggagtgatcaacaatatgggatgaaaccaaaaggaagacagctgtgtaaacatcaatcatttggccaaggagagcctggtgatcttggctaga	T	C	0.433554	0.00948066	0.566446	0.00948066	0.187225	0.00665371	0.492658	0.00665371	0.320117	0.00665371	1362	2	0.370546	0.492658	0.49117	0.012502	0.910972	0.9531	255	671	436	0.969322	18	70389029	17058		35	84735	intron	C/T	0.471568	0.115791	YES	2	2	2	1	reference
CNDP1_rs6566815	CNDP1	http://www.ncbi.nlm.nih.gov/entrez/query.fcgi?db=gene&cmd=Retrieve&dopt=full_report&list_uids=84735	rs6566815		http://www.ncbi.nlm.nih.gov/SNP/snp_ref.cgi?rs=6566815	A	C	TCTGAGGCAGGGAAGCTCTTGGATGTTTGCGAAACTGGGAGGATTTGAAGGATGGGGTTGTCAGGGTGTATCTAGTGAGGGCAGAGCAAGCCAGAAGAGTAAGCAGAGAGCAGGTTGAGC[A/C]GGACTTGTAGACCTTCTTGGGATGTCTGACTTCATCCTCAGACCATGTCGCCAGTTGAGAGCTTTAAGCAGGGTGAGAGGGACAAGCCAGTTGCCGCATGGCATGTACAGTGAGAGGGGC	GCCCCTCTCACTGTACATGCCATGCGGCAACTGGCTTGTCCCTCTCACCCTGCTTAAAGCTCTCAACTGGCGACATGGTCTGAGGATGAAGTCAGACATCCCAAGAAGGTCTACAAGTCC[T/G]GCTCAACCTGCTCTCTGCTTACTCTTCTGGCTTGCTCTGCCCTCACTAGATACACCCTGACAACCCCATCCTTCAAATCCTCCCAGTTTCGCAAACATCCAAGAGCTTCCCTGCCTCAGA	T	G	0.680617	0.00885842	0.319383	0.00885842	0.459618	0.0058598	0.441997	0.0058598	0.0983847	0.0058598	1362	2	0.340249	0.441997	0.434755	0.377911	0.538723	0.5792	626	602	134	0.85189	18	70406087	-51777		35	84735	locus-region, 3'	G/T	0.49056	0.0680507	YES	1	1	1	1	reference
CNDP1_rs7244370	CNDP1	http://www.ncbi.nlm.nih.gov/entrez/query.fcgi?db=gene&cmd=Retrieve&dopt=full_report&list_uids=84735	rs7244370		http://www.ncbi.nlm.nih.gov/SNP/snp_ref.cgi?rs=7244370	A	C	AATCACCATGACACAAATTTACCTATGTAAGAAACCTGCACATGTACTGCTAAACCAAAAATAAAAGTTAAAAAAAAGTAAAAGAATAGCAAAGGGGAAAATATATAGTACAATCTCTTC[A/C]TCTCTTTCATATCAAAGGGTATTATATTGAGTCCAAAACAAAATATTTCCTTCTTTTTTGTTTCAGACAGGGTCTTACTCTGCCTCCCAGGCTGGAGTGCAGTGGCGCAACCATGGCTCA	tgagccatggttgcgccactgcactccagcctgggaggcagagtaagaccctgtctgaaacaaaaaagaaggaaaTATTTTGTTTTGGACTCAATATAATACCCTTTGATATGAAAGAGA[G/T]GAAGAGATTGTACTATATATTTTCCCCTTTGCTATTCTTTTACttttttttaacttttatttttggtttagcagtacatgtgcaggtttcttacataggtaaatttgtgtcatggtgatt	G	T	0.132893	0.0064195	0.867107	0.0064195	0.0146843	0.00292657	0.236417	0.00292657	0.748899	0.00292657	1362	2	0.203908	0.236417	0.230465	0.908564	0.340496	0.4166	20	322	1020	0.941176	18	70354310	19885		35	84735	intron	G/T	0.260355	0.249785	YES	2	2	2	1	reference
CNDP1_rs733686	CNDP1	http://www.ncbi.nlm.nih.gov/entrez/query.fcgi?db=gene&cmd=Retrieve&dopt=full_report&list_uids=84735	rs733686		http://www.ncbi.nlm.nih.gov/SNP/snp_ref.cgi?rs=733686	A	G	TCAGGAGCCAGTGGAAAGAAACCCCACAACACTGGATTTTAGGCATTGCTCAGAAATTCTTTTGTCTAATAGAGCAGTTCATCACACATGGAAGATTTTTGCGTGTTTGTTTTTGGTTCT[A/G]CCTTACTCTTTTCTCTCTTGTAAAGATCACCCTTCACTCCTGGGCAGCAGAACTGGGCCTCCCCAAGGGGCCAGGAGGAAACACCTTATCCTAGGAATAAACGGAATGATGTTATTTAAA	TTTAAATAACATCATTCCGTTTATTCCTAGGATAAGGTGTTTCCTCCTGGCCCCTTGGGGAGGCCCAGTTCTGCTGCCCAGGAGTGAAGGGTGATCTTTACAAGAGAGAAAAGAGTAAGG[C/T]AGAACCAAAAACAAACACGCAAAAATCTTCCATGTGTGATGAACTGCTCTATTAGACAAAAGAATTTCTGAGCAATGCCTAAAATCCAGTGTTGTGGGGTTTCTTTCCACTGGCTCCTGA	C	T	0.288546	0.00862823	0.711454	0.00862823	0.0807636	0.0055326	0.415565	0.0055326	0.503671	0.0055326	1362	2	0.326289	0.415565	0.410575	0.201242	0.65372	0.6996	110	566	686	0.913098	18	70374195	33402		35	84735	intron	C/T	0.40911	0.192832	YES	2	2	2	1	reference
CNDP1_rs7506051	CNDP1	http://www.ncbi.nlm.nih.gov/entrez/query.fcgi?db=gene&cmd=Retrieve&dopt=full_report&list_uids=84735	rs7506051		http://www.ncbi.nlm.nih.gov/SNP/snp_ref.cgi?rs=7506051	A	C	ATTCCTCTTGAGCAATCAGAAGACAGAGTGAGATGACACTGCTCTGCCATTCCTGCAGGTGATGAGAAGCTAAGCTGAGGAGAGCACGAAGCCCAGCATCTGACCATTTAGACATGCTCA[A/C]CAAAGTTCTTAGAAGAAGCAGAGGAAGGAGAAAGCTCACAAAAGAAAACAAATGCTATTTTATCTGACTTCTCACTTCTACGGATAGTTGTTTTCACTTAAAAACAAATCCCCAAACTGT	ATTCCTCTTGAGCAATCAGAAGACAGAGTGAGATGACACTGCTCTGCCATTCCTGCAGGTGATGAGAAGCTAAGCTGAGGAGAGCACGAAGCCCAGCATCTGACCATTTAGACATGCTCA[A/C]CAAAGTTCTTAGAAGAAGCAGAGGAAGGAGAAAGCTCACAAAAGAAAACAAATGCTATTTTATCTGACTTCTCACTTCTACGGATAGTTGTTTTCACTTAAAAACAAATCCCCAAACTGT	A	C	0.195301	0.00750732	0.804699	0.00750732	0.0345081	0.00413927	0.321586	0.00413927	0.643906	0.00413927	1362	2	0.264919	0.321586	0.314317	0.7284	0.393402	0.4385	47	438	877	0.921125	18	70407597			35	84735	locus-region, 3'	A/C	0.21875	0.248039	YES	2	2	2	1	reference
CNDP1_rs8087768	CNDP1	http://www.ncbi.nlm.nih.gov/entrez/query.fcgi?db=gene&cmd=Retrieve&dopt=full_report&list_uids=84735	rs8087768		http://www.ncbi.nlm.nih.gov/SNP/snp_ref.cgi?rs=8087768	A	C	ATGGGGAAACAGGGCATGGCTCTCGGTTTTGAGGGGTGAGAGGTGTAAATCCTAAGGGATCCATGAGGCTGTGCCTGACGCTGGAGCCAAAACCCAAGGCGAACATTCTCCTTTGGAGAT[A/C]TCGTAGCTGTGGCCACACCAGAGCCACTGGCTCTTCTTCCTTTAAATCTCATTTGAGTGATTTTTGTGTAAAAGTGTCGATAGGATATTTACAGAATACCTGCAGGGGAGACTGTACAAT	ATTGTACAGTCTCCCCTGCAGGTATTCTGTAAATATCCTATCGACACTTTTACACAAAAATCACTCAAATGAGATTTAAAGGAAGAAGAGCCAGTGGCTCTGGTGTGGCCACAGCTACGA[T/G]ATCTCCAAAGGAGAATGTTCGCCTTGGGTTTTGGCTCCAGCGTCAGGCACAGCCTCATGGATCCCTTAGGATTTACACCTCTCACCCCTCAAAACCGAGAGCCATGCCCTGTTTCCCCAT	T	G	0.717327	0.00864601	0.282673	0.00864601	0.515419	0.0055051	0.403818	0.0055051	0.0807636	0.0055051	1362	2	0.323307	0.403818	0.405538	0.0244899	0.875645	0.8945	702	550	110	0.942293	18	70364052	-13719		35	84735	intron	G/T	0.411478	0.190853	YES	2	2	2	1	reference
CNDP1_rs8096427	CNDP1	http://www.ncbi.nlm.nih.gov/entrez/query.fcgi?db=gene&cmd=Retrieve&dopt=full_report&list_uids=84735	rs8096427		http://www.ncbi.nlm.nih.gov/SNP/snp_ref.cgi?rs=8096427	A	G	TAAATCAATACAAATTTAAAAAATGTTTTGTTAGTTGATTACAAAAGAAGACATTTGATTCTATTACTAATATAGTTTGGAAGGAAGGAAGGAAAGACTCCAACAGATATTAGCAAGAAC[A/G]GAAGCCAAACACAGGTCCAGGGGAAAGTGCTCCTACAAGAATTCCAATTATTTTGCCTTCTCAGTCTTCCATCTTCACAGATCTCCATCTCGATGCCAGTTAAATCTGGGAGACAGTGGA	TCCACTGTCTCCCAGATTTAACTGGCATCGAGATGGAGATCTGTGAAGATGGAAGACTGAGAAGGCAAAATAATTGGAATTCTTGTAGGAGCACTTTCCCCTGGACCTGTGTTTGGCTTC[C/T]GTTCTTGCTAATATCTGTTGGAGTCTTTCCTTCCTTCCTTCCAAACTATATTAGTAATAGAATCAAATGTCTTCTTTTGTAATCAACTAACAAAACATTTTTTAAATTTGTATTGATTTA	C	T	0.728708	0.00851523	0.271292	0.00851523	0.530837	0.0053542	0.395742	0.0053542	0.0734214	0.0053542	1362	2	0.317221	0.395742	0.395386	0.00110452	0.973488	1	723	539	100	0.837509	18	70350333	95096638		35	84735	locus-region, 5'	C/T	0.431834	0.17157	YES	2	2	2	1	reference
COBLL1_rs171392	COBLL1	http://www.ncbi.nlm.nih.gov/entrez/query.fcgi?db=gene&cmd=Retrieve&dopt=full_report&list_uids=22837	rs171392		http://www.ncbi.nlm.nih.gov/SNP/snp_ref.cgi?rs=171392	A	G	TCATTGATGAATGGTTGCTTAATACTGTTTTTTGAGCAAATATTGAAACCAATAATTTTCTAATTATTTTATTCCTTCTGTATTTTATTATCTAGAATTCTTTAAAGGAAACCCTTGTTC[A/G]TCAAATGTTATATTTCTGTATGAACTGTATTTCAGGCAGTATAAATGCTTGATTGATTCTTTCCCTAAATTTTCAGGGTACTAAGAGATGTCCTACCTTAGCAGCCTTCATAATGACTAT	Tcattgatgaatggttgcttaatactgttttttgagcaaatattgaaaccaataattttctaattattttattccttctgtattttattatctagaattctttaaaggaaacccttgttc[A/G]tcaaatgttatatttctgtatgaactgtatttcaggcagtataaatgcttgattgattctttccctaaattttcagggtactaagagatgtcctaccttagcagccttcataatgactat	A	G	0.810573	0.00759931	0.189427	0.00759931	0.660793	0.00428554	0.299559	0.00428554	0.0396476	0.00428554	1362	2	0.259937	0.299559	0.307089	0.818857	0.365515	0.3724	900	408	54	0.85308	2	165446971			35	22837	.	A/G	0.331087	0.236484	YES	2	2	2	1	reference
COH1_rs10955222	COH1	http://www.ncbi.nlm.nih.gov/entrez/query.fcgi?db=gene&cmd=Retrieve&dopt=full_report&list_uids=157680	rs10955222		http://www.ncbi.nlm.nih.gov/SNP/snp_ref.cgi?rs=10955222	A	G	TTTTAGCAGTATAACTGAAAGTTGTGCATGAGACTTAGGACAGCCTCCTTAGAATAAGCATTTGGTGTTGCATAAAATTCCCATGTTTGAAGTTGACGATTTGATAACATTCTACTCACC[A/G]TTAAAACATCTGTCATTGTTCTTTAGCAGCCAGCCCAAGAAAAAAGGAGAAAAATCTTTCCTCCACATAAATCATCTATTCAACATTAAACTCAGCACTGAAATAAAAGCTCTGTTTGCC	GGCAAACAGAGCTTTTATTTCAGTGCTGAGTTTAATGTTGAATAGATGATTTATGTGGAGGAAAGATTTTTCTCCTTTTTTCTTGGGCTGGCTGCTAAAGAACAATGACAGATGTTTTAA[T/C]GGTGAGTAGAATGTTATCAAATCGTCAACTTCAAACATGGGAATTTTATGCAACACCAAATGCTTATTCTAAGGAGGCTGTCCTAAGTCTCATGCACAACTTTCAGTTATACTGCTAAAA	T	C	0.848752	0.00684211	0.151248	0.00684211	0.71953	0.00343445	0.258443	0.00343445	0.0220264	0.00343445	1362	2	0.223785	0.258443	0.256744	0.059654	0.807044	0.919	980	352	30	0.966948	8	100956526	2327		35	157680	intron	C/T	0.206111	0.246117	YES	2	2	2	1	reference
COH1_rs7157	COH1	http://www.ncbi.nlm.nih.gov/entrez/query.fcgi?db=gene&cmd=Retrieve&dopt=full_report&list_uids=157680	rs7157		http://www.ncbi.nlm.nih.gov/SNP/snp_ref.cgi?rs=7157	A	G	GTAACTTTATTATAACAAAACCTGTATATTACCCATTTAAACTCATGTGTAACATTCAGTGATGTGAGCTGTATTAAACCCAGGTATTAGTGAAAATTTGCATTGTAAAACCTGGTAACA[A/G]TAGACATCTATGGGTGGTCAGTAATTCAAGGACACCTTTTATTTTAAACAATTTTATATAATTCATATCAATATGCAAAATTACCATAAAAGATACAAGGATTAATACATATTTACATTT	AAATGTAAATATGTATTAATCCTTGTATCTTTTATGGTAATTTTGCATATTGATATGAATTATATAAAATTGTTTAAAATAAAAGGTGTCCTTGAATTACTGACCACCCATAGATGTCTA[T/C]TGTTACCAGGTTTTACAATGCAAATTTTCACTAATACCTGGGTTTAATACAGCTCACATCACTGAATGTTACACATGAGTTTAAATGGGTAATATACAGGTTTTGTTATAATAAAGTTAC	T	C	0.194567	0.00748538	0.805433	0.00748538	0.0337739	0.00411099	0.321586	0.00411099	0.64464	0.00411099	1362	2	0.264305	0.321586	0.313421	0.924289	0.336351	0.3879	46	438	878	0.938713	8	100958853			35	157680	mrna-utr	C/T	0.340452	0.233063	YES	2	2	2	1	reference
COL4A1_rs10492498	COL4A1	http://www.ncbi.nlm.nih.gov/entrez/query.fcgi?db=gene&cmd=Retrieve&dopt=full_report&list_uids=1282	rs10492498		http://www.ncbi.nlm.nih.gov/SNP/snp_ref.cgi?rs=10492498	A	G	AATTTCAAAATAAAGCTGGTTTAACGGAGTAAATAACACGTTAACCACCTCTGAGACTCCTGGCATCTAAAGTTAAAAAGCAAAACTGTTGAGTTATGTA[A/G]TTTTTATTGAAAACAGAATGCATTCTTCTTCATCTAGAGATACAAATGAATACTAGGACACACACACACACACACACACACACACACACACACACACCCC	GGGgtgtgtgtgtgtgtgtgtgtgtgtgtgtgtgtgtgtgtgtCCTAGTATTCATTTGTATCTCTAGATGAAGAAGAATGCATTCTGTTTTCAATAAAAA[T/C]TACATAACTCAACAGTTTTGCTTTTTAACTTTAGATGCCAGGAGTCTCAGAGGTGGTTAACGTGTTATTTACTCCGTTAAACCAGCTTTATTTTGAAATT	T	C	0.727974	0.00857694	0.272026	0.00857694	0.532305	0.00539893	0.391336	0.00539893	0.0763583	0.00539893	1362	2	0.317626	0.391336	0.396056	0.193427	0.66008	0.6809	725	533	104	0.920879	13	109648524	-36814	7	35	1282	intron	C/T	0.372238	0.218078	YES	2	2	2	1	reference
COL4A1_rs1133219	COL4A1	http://www.ncbi.nlm.nih.gov/entrez/query.fcgi?db=gene&cmd=Retrieve&dopt=full_report&list_uids=1282	rs1133219		http://www.ncbi.nlm.nih.gov/SNP/snp_ref.cgi?rs=1133219	A	G	GGGCATGGGCTCAGGGGTGGACAGCCAGTACGAGTAGTCATTTCGTGATGCAAAGTTGCACACGTTGTTAATATTGCAGAACAGGAAGGGCATTGTGCTGAACTTGCGCAGGCAGCTGCC[A/G]GCCGTGCCTAGACAAGGAAGAAGACAATGTGAGATGTTTCCTTTATAATTCACAATCTATCTCTATGTAAAGTGGATTTCAGCTGGACAACAAGCAAAAACATATAATCAACATAATCAC	GTGATTATGTTGATTATATGTTTTTGCTTGTTGTCCAGCTGAAATCCACTTTACATAGAGATAGATTGTGAATTATAAAGGAAACATCTCACATTGTCTTCTTCCTTGTCTAGGCACGGC[T/C]GGCAGCTGCCTGCGCAAGTTCAGCACAATGCCCTTCCTGTTCTGCAATATTAACAACGTGTGCAACTTTGCATCACGAAATGACTACTCGTACTGGCTGTCCACCCCTGAGCCCATGCCC	T	C	0.36036	0.0092567	0.63964	0.0092567	0.127628	0.00630503	0.465465	0.00630503	0.406907	0.00630503	1332	2	0.35474	0.465465	0.461002	0.124892	0.723789	0.7622	170	620	542	0.851201	13	109611710	-2131	7	35	1282	coding-synon	C/T	0.417161	0.185896	YES	2	2	2	1	reference
COL4A1_rs1192198	COL4A1	http://www.ncbi.nlm.nih.gov/entrez/query.fcgi?db=gene&cmd=Retrieve&dopt=full_report&list_uids=1282	rs1192198		http://www.ncbi.nlm.nih.gov/SNP/snp_ref.cgi?rs=1192198	A	G	TTGTATGTATATCTGTGCTTTATACATAAAATTATACAGATTTATACATAAAAAGTTATACAATAATACACACACTCCCCAGTTCCACCAGTTTTTGCTCCCTTGGGTGATATTGTACCC[A/G]TCGAAAATGCATGTGTTGGACTGAGCGATCTCCCTTGAGTGTTTATCCGCACTAATATCTGAAGTACGTTTTCAGGCCCCAGGAGCCTCCCTGATAGGAAGTAAGATGGAAAACTGAAAT	ATTTCAGTTTTCCATCTTACTTCCTATCAGGGAGGCTCCTGGGGCCTGAAAACGTACTTCAGATATTAGTGCGGATAAACACTCAAGGGAGATCGCTCAGTCCAACAcatgcattttcga[T/C]gggtacaatatcacccaagggagcaaaaactggtGGAACTGGGGAGTGTGTGTATTATTGTATAACTTTTTATGTATAAATCTGTATAATTTTATGTATAAAGCACAGATATACATACAA	T	C	0.812775	0.00733324	0.187225	0.00733324	0.654919	0.00391723	0.315712	0.00391723	0.0293686	0.00391723	1362	2	0.258031	0.315712	0.304343	1.90062	0.168009	0.1878	892	430	40	0.763017	13	109609579	-4879	7	35	1282	intron	C/T	0.30637	0.243562	YES	2	2	2	1	reference
COL4A1_rs12017058	COL4A1	http://www.ncbi.nlm.nih.gov/entrez/query.fcgi?db=gene&cmd=Retrieve&dopt=full_report&list_uids=1282	rs12017058		http://www.ncbi.nlm.nih.gov/SNP/snp_ref.cgi?rs=12017058	A	G	ACTGCAGCAAGGGCTCCGATCCCTCCTTCTCTTTAATAACACACTAGAATCCGACCATGGCCTGGCTGGAAAAAGAGCTCAGAATGCTAGGAACCCAGCTATCGTTTTCATACTTCTCAC[A/G]AGACGTGTTCTATGGCAAAGGCATCTGAATTGTGTTTAAAGACATCTGCAGCAACTGCACTGCTAAACGAAAGCCTCACTCCATCAGCACATGAATGGGCTGGACAAGCCAATCATGTTA	ACTGCAGCAAGGGCTCCGATCCCTCCTTCTCTTTAATAACACACTAGAATCCGACCATGGCCTGGCTGGAAAAAGAGCTCAGAATGCTAGGAACCCAGCTATCGTTTTCATACTTCTCAC[G/A]AGACGTGTTCTATGGCAAAGGCATCTGAATTGTGTTTAAAGACATCTGCAGCAACTGCACTGCTAAACGAAAGCCTCACtccatcagcacatgaatgggctggacaagccaatcatgtta	G	A	0.529369	0.0096522	0.470631	0.0096522	0.284875	0.00675043	0.488987	0.00675043	0.226138	0.00675043	1362	2	0.374136	0.488987	0.498275	0.473261	0.491491	0.5158	388	666	308	0.738044	13	109621341	120581	7	35	1282	intron	A/G	0.488588	0.0746726	YES	2	2	2	1	reference
COL4A1_rs1562174	COL4A1	http://www.ncbi.nlm.nih.gov/entrez/query.fcgi?db=gene&cmd=Retrieve&dopt=full_report&list_uids=1282	rs1562174		http://www.ncbi.nlm.nih.gov/SNP/snp_ref.cgi?rs=1562174	C	G	TTAAGAGCAGTAGAGCCAACCATCTGGTTTCTACCTGCCATTCCTCTTCGTCCTCCATCCTCTCTGTTTTATCCCACTGACAGCTGTCTCCCACCTTAGCCTCTCACCAGTCTCTAGATT[C/G]TTCCTTGGGGGAGAGGTAGTGAATACAAGGGGAAGGAGAGGCGACTTGTGCTGCCTTATGGGACTCCCTGTGTGTTATGGCTCATTGAGTGTGCTGAGATATTTGCTGAGCATTTCTCAG	CTGAGAAATGCTCAGCAAATATCTCAGCACACTCAATGAGCCATAACACACAGGGAGTCCCATAAGGCAGCACAAGTCGCCTCTCCTTCCCCTTGTATTCACTACCTCTCCCCCAAGGAA[C/G]AATCTAGAGACTGGTGAGAGGCTAAGGTGGGAGACAGCTGTCAGTGGGATAAAACAGAGAGGATGGAGGACGAAGAGGAATGGCAGGTAGAAACCAGATGGTTGGCTCTACTGCTCTTAA	C	G	0.636564	0.00924641	0.363436	0.00924641	0.406755	0.00627535	0.459618	0.00627535	0.133627	0.00627535	1362	2	0.355655	0.459618	0.462701	0.0604445	0.805795	0.8131	554	626	182	0.899663	13	109625389	4449	7	35	1282	intron	C/G	0.409384	0.192605	YES	2	2	2	1	reference
COL4A1_rs2131939	COL4A1	http://www.ncbi.nlm.nih.gov/entrez/query.fcgi?db=gene&cmd=Retrieve&dopt=full_report&list_uids=1282	rs2131939		http://www.ncbi.nlm.nih.gov/SNP/snp_ref.cgi?rs=2131939	A	G	CGGGAAGACCTGGCAAACCTTTGAGTCCCGGTAGACCAACTCCAGGCTCTCCCTGAAAATCCCCAAAGCACAGAGAAGCAAATTGATTTGCAAAGTCAGTATTTTTATCAAACCAATAGC[A/G]TAAGTGAAGACTTAACAGATACTGCCAATGCATTTAGTAAGAATATTATCTGCTCAACCCTTTTCAAGCGTTTGCAAAGCTTCCTCATACCTATTATATCTTTTCAATCTCACCACAAGC	GCTTGTGGTGAGATTGAAAAGATATAATAGGTATGAGGAAGCTTTGCAAACGCTTGAAAAGGGTTGAGCAGATAATATTCTTACTAAATGCATTGGCAGTATCTGTTAAGTCTTCACTTA[C/T]GCTATTGGTTTGATAAAAATACTGACTTTGCAAATCAATTTGCTTCTCTGTGCTTTGGGGATTTTCAGGGAGAGCCTGGAGTTGGTCTACCGGGACTCAAAGGTTTGCCAGGTCTTCCCG	C	T	0.136197	0.00660734	0.863803	0.00660734	0.0198238	0.00326439	0.232746	0.00326439	0.74743	0.00326439	1362	2	0.207613	0.232746	0.235294	0.159775	0.689364	0.6441	27	317	1018	0.965488	13	109629838	129445	7	35	1282	intron	C/T	0.072466	0.176016	YES	2	2	2	1	reference
COL4A1_rs2391824	COL4A1	http://www.ncbi.nlm.nih.gov/entrez/query.fcgi?db=gene&cmd=Retrieve&dopt=full_report&list_uids=1282	rs2391824		http://www.ncbi.nlm.nih.gov/SNP/snp_ref.cgi?rs=2391824	A	G	ACGTTTTGTTTAAAGAGTAGGAGCCACTTTTACTGAGCTTTATGTAACCATGGCTAAAATGAAGAGGTTTGGTAGGTGAATTCGGTGCAGGACTCAAATGTTTAGACAGGAGCTGAAAGC[A/G]GAGGGAGCTTTCGAGATGTCCGCTGTCCCTCCTCTCCTTACTGTGGCCGATGGAGTAGCCCTGCCCTGTGGCAGCCGGGGCCCAGGTGGATTCCTCCTGGGAACGACCCCTCCCTCCTCA	ACGTTTTGTTTAAAGAGTAGGAGCCACTTTTACTGAGCTTTATGTAACCATGGCTAAAATGAAGAGGTTTGGTAGGTGAATTCGGTGCAGGACTCAAATGTTTAGACAGGAGCTGAAAGC[A/G]GAGGGAGCTTTCGAGATGTCCGCTGTCCCTCCTCTCCTTACTGTGGCCGATGGAGTAGCCCTGCCCTGTGGCAGCCGGGGCCCAGGTGGATTCCTCCTGGGAACGACCCCTCCCTCCTCA	A	G	0.36931	0.00920663	0.63069	0.00920663	0.134361	0.00630299	0.469897	0.00630299	0.395742	0.00630299	1362	2	0.357337	0.469897	0.46584	0.103305	0.747898	0.7681	183	640	539	0.864842	13	109759283	-107737	7	35	1282	locus-region	A/G	0.387932	0.208506	YES	2	2	2	1	reference
COL4A1_rs3742205	COL4A1	http://www.ncbi.nlm.nih.gov/entrez/query.fcgi?db=gene&cmd=Retrieve&dopt=full_report&list_uids=1282	rs3742205		http://www.ncbi.nlm.nih.gov/SNP/snp_ref.cgi?rs=3742205	A	G	CCCTCCTTCTCTTCCTCCTCCCCCTCCTCCTCTTTCTCCTCTTCCTCCTCCTCCTCCTTCTCTCTCTCTCCCCACGCTTTCTATTTCTTCCCCTCTTTTT[A/G]TCTAGTTTTGACCTGTGTTCCTCCATATTTTGGAAGCATCTGCAGGCCTTGCAGGACTGTCTGTGACCAGGTCTCCTCCAAGTTCCTATTTCACTGTCAC	CCCTCCTTCTCTTCCTCCTCCCCCTCCTCCTCTTTCTCCTCTTCCTCCTCCTCCTCCTTCTCTCTCTCTCCCCACGCTTTCTATTTCTTCCCCTCTTTTT[A/G]TCTAGTTTTGACCTGTGTTCCTCCATATTTTGGAAGCATCTGCAGGCCTTGCAGGACTGTCTGTGACCAGGTCTCCTCCAAGTTCCTATTTCACTGTCAC	A	G	0.000734214	0.000518787	0.999266	0.000518787			0.00146843	7.61801e-07	0.998532	7.61801e-07	1362	2	0.00146627	0.00146843	0.00146735	0.000735294	0.978367	1	0	2	1360	0.834798	13	109651546	-34947	7	35	1282	intron	A/G	0.0894576	0.191641	YES	2	2	2	1	reference
COL4A1_rs3742207	COL4A1	http://www.ncbi.nlm.nih.gov/entrez/query.fcgi?db=gene&cmd=Retrieve&dopt=full_report&list_uids=1282	rs3742207		http://www.ncbi.nlm.nih.gov/SNP/snp_ref.cgi?rs=3742207	A	C	ATATACACACACATATTTGTATATCATTGGGAATTCTGTGCAAGACAGTGCTTTCCCTCTGCTTTTAGGTCCAAAAGGTCTTCCTGGCCTCCAGGGAATTAAAGGTGATCAAGGCGATCA[A/C]GGCGTCCCGGGAGCTAAAGGTAGGAGAGTTTGTTGATCTGTGGACACCTTACTGGTGCTTTGTGAAAATGTAAAAGCCAGGAATGCACAGAATTGGGGTGTTTGGTTTTTCATATGTGAA	ATATACACACACATATTTGTATATCATTGGGAATTCTGTGCAAGACAGTGCTTTCCCTCTGCTTTTAGGTCCAAAAGGTCTTCCTGGCCTCCAGGGAATTAAAGGTGATCAAGGCGATCA[C/A]GGCGTCCCGGGAGCTAAAGGTAGGAGAGTTTGTTGATCTGTGGACACCTTACTGGTGCTTTGTGAAAATGTAAAAGCCAGGAATGCACAGAATTGGGGTGTTTGGTTTTTCATATGTGAA	C	A	0.661894	0.00897882	0.338106	0.00897882	0.433921	0.00603623	0.455947	0.00603623	0.110132	0.00603623	1362	2	0.347416	0.455947	0.44758	0.475924	0.490274	0.5056	591	621	150	0.863104	13	109616599	81357	7	35	1282	coding-nonsynon	A/C	0.43295	0.17038	YES	2	2	2	1	reference
COL4A1_rs4145072	COL4A1	http://www.ncbi.nlm.nih.gov/entrez/query.fcgi?db=gene&cmd=Retrieve&dopt=full_report&list_uids=1282	rs4145072		http://www.ncbi.nlm.nih.gov/SNP/snp_ref.cgi?rs=4145072	A	G	TGAGCTTTCCTCTTTTTGCATCCTCTGGAATGGAATTCACTGTAATCTTGAGAAGAGCGCCCTCTTGGTCTGTAGATGCGAGAAAACCAGAAATAGGCTTTATTTCTTATTAAAACCATT[A/G]ACTTCTCTTCCTCCCCTTTCTTCTTTGGCACTCGTACTGTGTATTGTAAAATCTTTGTGTATTTTAAGAACTTAATATACTTTATAACGTGAATACTGATGGTGGATCTCTGAATATCTT	AAGATATTCAGAGATCCACCATCAGTATTCACGTTATAAAGTATATTAAGTTCTTAAAATACACAAAGATTTTACAATACACAGTACGAGTGCCAAAGAAGAAAGGGGAGGAAGAGAAGT[C/T]AATGGTTTTAATAAGAAATAAAGCCTATTTCTGGTTTTCTCGCATCTACAGACCAAGAGGGCGCTCTTCTCAAGATTACAGTGAATTCCATTCCAGAGGATGCAAAAAGAGGAAAGCTCA	C	T	0.491189	0.00980648	0.508811	0.00980648	0.253304	0.00676434	0.475771	0.00676434	0.270925	0.00676434	1362	2	0.374922	0.475771	0.499845	3.15934	0.0754935	0.0769	345	648	369	0.775582	13	109697956	32238	7	35	1282	intron	C/T	0.489574	0.0714454	YES	2	2	2	1	reference
COL4A1_rs4773139	COL4A1	http://www.ncbi.nlm.nih.gov/entrez/query.fcgi?db=gene&cmd=Retrieve&dopt=full_report&list_uids=1282	rs4773139		http://www.ncbi.nlm.nih.gov/SNP/snp_ref.cgi?rs=4773139	A	G	AAGTTTTGCTGTTGTTGTTCAACTTTCTAACCAGTGCCCATTTCACAGTATTTTCTTTCATTCTCAACACTGACTTTCTTGGCACTACTATTCAGTGAGTCCCTTCTGCAGTGCTGGCCT[A/G]TCTCCCGTGGGCCTGCATCGAGAGGGCTGGCTGCCCTCCTTACTGTGGCCACTGTCTTCTCCTGGGTCTGCCAGACACCTCCAGAGAGCGTCCACGTTGCACCTGCTTTAGGTCCTGTGA	AAGTTTTGCTGTTGTTGTTCAACTTTCTAACCAGTGCCCATTTCACAGTATTTTCTTTCATTCTCAACACTGACTTTCTTGGCACTACTATTCAGTGAGTCCCTTCTGCAGTGCTGGCCT[G/A]TCTCCCGTGGGCCTGCATCGAGAGGGCTGGCTGCCCTCCTTACTGTGGCCACTGTCTTCTCCTGGGTCTGCCAGACACCTCCAGAGAGCGTCCACGTTGCACCTGCTTTAGGTCCTGTGA	G	A	0.197871	0.00769784	0.802129	0.00769784	0.0418502	0.00438334	0.312041	0.00438334	0.646109	0.00438334	1362	2	0.267053	0.312041	0.317436	0.393376	0.53053	0.5418	57	425	880	0.920872	13	109730194	-12217	7	35	1282	intron	A/G	0.173817	0.238109	YES	2	2	2	1	reference
COL4A1_rs492560	COL4A1	http://www.ncbi.nlm.nih.gov/entrez/query.fcgi?db=gene&cmd=Retrieve&dopt=full_report&list_uids=1282	rs492560		http://www.ncbi.nlm.nih.gov/SNP/snp_ref.cgi?rs=492560	A	G	ATTGAATCTGAAAATCCTGAAATATTGCAAATTTTATCATAGCTATTATCTACTCCATGTTAATTTTCAGTTGTTTCCAGCTATAGATCAGTTTTCTTTGTCTAAGTGCTTCTTACACTC[A/G]TGTCACTGAAAACCTGAAGAGTACAGAGCCCAGCCCCTGTTTTGGGTGCTTGGATAAGGGGAGCTTACTGGTGGATAAGGAAAACTCCAGAGACTGAGAGCTCTTTGGAGTTTTCTGGGT	ATTGAATCTGAAAATCCTGAAATATTGCAAATTTTATCATAGCTATTATCTACTCCATGTTAATTTTCAGTTGTTTCCAGCTATAGATCAGTTTTCTTTGTCTAAGTGCTTCTTACACTC[G/A]TGTCACTGAAAACCTGAAGAGTACAGAGCCCAGCCCCTGTTTTGGGTGCTTGGATAAGGGGAGCTTACTGGTGGATAAGGAAAACTCCAGAGACTGAGAGCTCTTTGGAGTTTTCTGGGT	G	A	0.650514	0.00915988	0.349486	0.00915988	0.424376	0.00616667	0.452276	0.00616667	0.123348	0.00616667	1362	2	0.351319	0.452276	0.454691	0.038423	0.844596	0.8615	578	616	168	0.959071	13	109717977	-68962	7	35	1282	intron	A/G	0.398858	0.200852	YES	2	2	2	1	reference
COL4A1_rs496916	COL4A1	http://www.ncbi.nlm.nih.gov/entrez/query.fcgi?db=gene&cmd=Retrieve&dopt=full_report&list_uids=1282	rs496916		http://www.ncbi.nlm.nih.gov/SNP/snp_ref.cgi?rs=496916	C	G	GATGTACCAGGAAATCCTCGGTCACCTTTTTCTCCTCTTTCACCAGGGAAGCCAGGGGCACCAGCCTGCCCAGGTACAGGGAGGCCTGCAACCAGACAGAAGCTCACATCAGTAACCTCA[C/G]GGCCACTTAGCAACTACAGCATAAACTCATTCTCCTAACTCTGTTCAAGGTAAAAATCCAACCAGACCATCACTGAAAAGGGAACTGCTTTAGACATGTAAAACCAAATTAAGCTGGCAG	GATGTACCAGGAAATCCTCGGTCACCTTTTTCTCCTCTTTCACCAGGGAAGCCAGGGGCACCAGCCTGCCCAGGTACAGGGAGGCCTGCAACCAGACAGAAGCTCACATCAGTAACCTCA[C/G]GGCCACTTAGCAACTACAGCATAAACTCATTCTCCTAACTCTGTTCAAGGTAAAAATCCAACCAGACCATCACTGAAAAGGGAACTGCTTTAGACATGTAAAACCAAATTAAGCTGGCAG	C	G	0.364905	0.00927678	0.635095	0.00927678	0.13583	0.00629055	0.45815	0.00629055	0.406021	0.00629055	1362	2	0.356083	0.45815	0.463498	0.181372	0.670197	0.6896	185	624	553	0.924812	13	109649015	41709	7	35	1282	intron	C/G	0.489332	0.0722504	YES	2	2	2	1	reference
COL4A1_rs521969	COL4A1	http://www.ncbi.nlm.nih.gov/entrez/query.fcgi?db=gene&cmd=Retrieve&dopt=full_report&list_uids=1282	rs521969		http://www.ncbi.nlm.nih.gov/SNP/snp_ref.cgi?rs=521969	A	G	GAAACAGGAGTGTAGAGGAGCAGGTCAGGCCAAAAAAGTCCTGGAGGTGCTGGGCTCCCTGGCCTAGGTCCCTTGGTGGGAAACCTGGCTAAGGCCACACAAGGAGGGGAGCAGGATCCT[A/G]CTCCTTCCATCCCAGTCCTGGCCCGGGCTCTGCTGACTCCCAGTGTCAAGGCTAAAGCTGGCCCCTGTAGGAAGCTGGCATGGAGCCTCCCTCGGGACACAACTTCCACGTGGCCCCACA	TGTGGGGCCACGTGGAAGTTGTGTCCCGAGGGAGGCTCCATGCCAGCTTCCTACAGGGGCCAGCTTTAGCCTTGACACTGGGAGTCAGCAGAGCCCGGGCCAGGACTGGGATGGAAGGAG[C/T]AGGATCCTGCTCCCCTCCTTGTGTGGCCTTAGCCAGGTTTCCCACCAAGGGACCTAGGCCAGGGAGCCCAGCACCTCCAGGACTTTTTTGGCCTGACCTGCTCCTCTACACTCCTGTTTC	C	T	0.100587	0.00583779	0.899413	0.00583779	0.0124816	0.00266697	0.176211	0.00266697	0.811307	0.00266697	1362	2	0.16457	0.176211	0.180939	0.929829	0.334907	0.3697	17	240	1105	0.939699	13	109690724	-32504	7	35	1282	intron	C/T	0.23745	0.249685	YES	2	2	2	1	reference
COL4A1_rs529041	COL4A1	http://www.ncbi.nlm.nih.gov/entrez/query.fcgi?db=gene&cmd=Retrieve&dopt=full_report&list_uids=1282	rs529041		http://www.ncbi.nlm.nih.gov/SNP/snp_ref.cgi?rs=529041	A	G	AGTCTTTTCATAAACTTTGAAATATAGTGACTCTGAAATGTATGCAGTTGTAATTTTTAGGCGTACCCGGCAGTTAGGATGCCCGAGGAGGGAGACTCTTGATGGTTGTCTTATTCTGGG[A/G]TTACCTAAAATGCCTTCTTTTTTCTCAAGCTCTATTAGGTAGTTTGTATTCCTTTCCTCCGTGCCATCAGAAGCCAGTATACACTATACAGGGGCACGCAAGTCCGGAGGTGTCTTGCAG	AGTCTTTTCATAAACTTTGAAATATAGTGACTCTGAAATGTATGCAGTTGTAATTTTTAGGCGTACCCGGCAGTTAGGATGCCCGAGGAGGGAGACTCTTGATGGTTGTCTTATTCTGGG[A/G]TTACCTAAAATGCCTTCTTTTTTCTCAAGCTCTATTAGGTAGTTTGTATTCCTTTCCTCCGTGCCATCAGAAGCCAGTATACACTATACAGGGGCACGCAAGTCCGGAGGTGTCTTGCAG	A	G	0.0814978	0.00524096	0.918502	0.00524096	0.00660793	0.00202401	0.14978	0.00202401	0.843612	0.00202401	1362	2	0.138505	0.14978	0.149712	0.000280348	0.986641	1	9	204	1149	0.809682	13	109658220	78594	7	35	1282	intron	A/G	0.192537	0.243306	YES	2	2	2	1	reference
COL4A1_rs552125	COL4A1	http://www.ncbi.nlm.nih.gov/entrez/query.fcgi?db=gene&cmd=Retrieve&dopt=full_report&list_uids=1282	rs552125		http://www.ncbi.nlm.nih.gov/SNP/snp_ref.cgi?rs=552125	A	G	AGGCGGCTCCTCTGTATCCCAGCTGGTGGTCTTACTGCCTCAGCCCCATTTTCCTGGGAACTGTTCCTCCTCTTCCAGGAATGGATTTCTTGGCATGATACTTCTGCCTCTCTCCCCCAC[A/G]CAATCTGAATGCCACACAAGGCTCTGGACCCTGAGGCTCCTGTCTGGGCCTGACCGGACAGCGGGCCCCTCCAGGCATGGCCATCTCTCCCTTTAGCCTGCTCAGCCCTCCTACTCTGCC	AGGCGGCTCCTCTGTATCCCAGCTGGTGGTCTTACTGCCTCAGCCCCATTTTCCTGGGAACTGTTCCTCCTCTTCCAGGAATGGATTTCTTGGCATGATACTTCTGCCTCTCTCCCCCAC[A/G]CAATCTGAATGCCACACAAGGCTCTGGACCCTGAGGCTCCTGTCTGGGCCTGACCGGACAGCGGGCCCCTCCAGGCATGGCCATCTCTCCCTTTAGCCTGCTCAGCCCTCCTACTCTGCC	A	G	0.12813	0.00642826	0.87187	0.00642826	0.0169367	0.00306613	0.222386	0.00306613	0.760677	0.00306613	1358	2	0.198465	0.222386	0.223425	0.0293649	0.863939	0.813	23	302	1033	0.805684	13	109736814	-2586	7	35	1282	intron	A/G	0.171371	0.237313	YES	2	2	2	1	reference
COL4A1_rs561437	COL4A1	http://www.ncbi.nlm.nih.gov/entrez/query.fcgi?db=gene&cmd=Retrieve&dopt=full_report&list_uids=1282	rs561437		http://www.ncbi.nlm.nih.gov/SNP/snp_ref.cgi?rs=561437	A	G	CACCGGACAGACCCTTTGCTGAAGGCTCCTGGCCTGTGGCCACCACTGTCATACAGCGCTGTTCCTTGGGCTGGAGGGAGAGCTTTTGCCACCTCATCTCCCATCCTGTCGACATGTGAC[A/G]GCTTTGCCAGCCCAGCCACAGTGACTAAAGTCTTCAGGGTCATGAAAAATAACCCCCCAAATGCCACCCACTGCTGCTGTCCAAGCTCACCCCACCAGCATAAGGCCTGGCTTAGTATGG	CCATACTAAGCCAGGCCTTATGCTGGTGGGGTGAGCTTGGACAGCAGCAGTGGGTGGCATTTGGGGGGTTATTTTTCATGACCCTGAAGACTTTAGTCACTGTGGCTGGGCTGGCAAAGC[T/C]GTCACATGTCGACAGGATGGGAGATGAGGTGGCAAAAGCTCTCCCTCCAGCCCAAGGAACAGCGCTGTATGACAGTGGTGGCCACAGGCCAGGAGCCTTCAGCAAAGGGTCTGTCCGGTG	T	C	0.499633	0.00958705	0.500367	0.00958705	0.249816	0.00677658	0.499633	0.00677658	0.250551	0.00677658	1361	2	0.375	0.499633	0.5	0.000733675	0.978391	1	340	680	341	0.855426	13	109734228	-27450	7	35	1282	intron	C/T	0.48932	0.0722922	YES	2	2	2	1	reference
COL4A1_rs562992	COL4A1	http://www.ncbi.nlm.nih.gov/entrez/query.fcgi?db=gene&cmd=Retrieve&dopt=full_report&list_uids=1282	rs562992		http://www.ncbi.nlm.nih.gov/SNP/snp_ref.cgi?rs=562992	A	C	TCTGGAATTTCCTCCTTTGCTTTCCCGGGCACTGACATCCTCCCTGTGGTTCTGGGCTCTGAGGTCCAGTTCACCTGCTCCCTCGAGGATGCACGTTCACAGTGCCTGCTGGTTCCTGAC[A/C]GGGCAGCACCACTCAGCAAGTGGCCATCCTCCTCTGCTGTCTTCACCTCTTCCTCCCGAGTATCATCCTCGTCCAAAACCATTTTTCCTTCTCCAGCATCTTGTAGGTTTGTTGCAATCA	TCTGGAATTTCCTCCTTTGCTTTCCCGGGCACTGACATCCTCCCTGTGGTTCTGGGCTCTGAGGTCCAGTTCACCTGCTCCCTCGAGGATGCACGTTCACAGTGCCTGCTGGTTCCTGAC[A/C]GGGCAGCACCACTCAGCAAGTGGCCATCCTCCTCTGCTGTCTTCACCTCTTCCTCCCGAGTATCATCCTCGTCCAAAACCATTTTTCCTTCTCCAGCATCTTGTAGGTTTGTTGCAATCA	A	C	0.834435	0.00703908	0.165565	0.00703908	0.693098	0.00360008	0.282673	0.00360008	0.0242291	0.00360008	1362	2	0.238134	0.282673	0.276307	0.722894	0.395196	0.4421	944	385	33	0.858349	13	109706778	-44381	7	35	1282	intron	A/C	0.210618	0.246879	YES	2	2	2	1	reference
COL4A1_rs626444	COL4A1	http://www.ncbi.nlm.nih.gov/entrez/query.fcgi?db=gene&cmd=Retrieve&dopt=full_report&list_uids=1282	rs626444		http://www.ncbi.nlm.nih.gov/SNP/snp_ref.cgi?rs=626444	A	G	TACCTATAATCATTTACTACATCACGTAAGAAAATGCCATTATGGGCCTTTGTCCCTATTAATGATACTATCAAGTCTATTTCTTCTTTCATAAAGTGGTACCCAGTAGCACAGCTTGTG[A/G]CAAACTGTTTTTAGGAAATGATTTTAACCAACAAATGAAGGGTAGGGCAGAGTGATGCATGCGATGTCAGGGCTGATGTGTCTGCCACACACAGTGCGTATGAATGATGCTCTGCTGTCT	AGACAGCAGAGCATCATTCATACGCACTGTGTGTGGCAGACACATCAGCCCTGACATCGCATGCATCACTCTGCCCTACCCTTCATTTGTTGGTTAAAATCATTTCCTAAAAACAGTTTG[C/T]CACAAGCTGTGCTACTGGGTACCACTTTATGAAAGAAGAAATAGACTTGATAGTATCATTAATAGGGACAAAGGCCCATAATGGCATTTTCTTACGTGATGTAGTAAATGATTATAGGTA	C	T	0.43025	0.00949875	0.56975	0.00949875	0.185756	0.00664294	0.488987	0.00664294	0.325257	0.00664294	1362	2	0.370088	0.488987	0.49027	0.00932722	0.923062	0.9122	253	666	443	0.934844	13	109662397	50739	7	35	1282	intron	C/T	0.494559	0.0518736	YES	2	2	2	1	reference
COL4A1_rs627527	COL4A1	http://www.ncbi.nlm.nih.gov/entrez/query.fcgi?db=gene&cmd=Retrieve&dopt=full_report&list_uids=1282	rs627527		http://www.ncbi.nlm.nih.gov/SNP/snp_ref.cgi?rs=627527	A	G	TACAATGGGAAGGAAAGTGAAACAATACATGTTTCAGGGAAACACGCATCTCCTGATTCTGCTGCACTGATTAATCCTCCCTGCCTGGAATTTCCAGCTGTCCTGATCTGCTTCACTTC[A/G]ATGTGTTCCCCAATGGGTCTAAGTCTCCTTCATGATAACCTTCCAGTTTACGGCTGTATTTTAAAACCAGTATTTCATTTCAAGGGCTGCAAGGAGTCCATCAACACTTGTGCCCTAAAG	CTTTAGGGCACAAGTGTTGATGGACTCCTTGCAGCCCTTGAAATGAAATACTGGTTTTAAAATACAGCCGTAAACTGGAAGGTTATCATGAAGGAGACTTAGACCCATTGGGGAACACAT[C/T]GAAGTGAAGCAGATCAGGACAGCTGGAAATTCCAGGCAGGGAGGATTAATCAGTGCAGCAGAATCAGGAGATGCGTGTTTCCCTGAAACATGTATTGTTTCACTTTCCTTCCCATTGTA	C	T	0.586637	0.009496	0.413363	0.009496	0.347283	0.00657543	0.478708	0.00657543	0.174009	0.00657543	1362	2	0.367381	0.478708	0.484988	0.22838	0.632727	0.6463	473	652	237	0.707471	13	109713136	-38089	7	35	1282	intron	C/T	0.499708	0.0120743	YES	2	2	2	1	reference
COL4A1_rs630943	COL4A1	http://www.ncbi.nlm.nih.gov/entrez/query.fcgi?db=gene&cmd=Retrieve&dopt=full_report&list_uids=1282	rs630943		http://www.ncbi.nlm.nih.gov/SNP/snp_ref.cgi?rs=630943	A	G	TCCCAAAGTGCTGGTATTACAGGTGTGAGCCAACGCTCCTGACCTAATTTTTTTTCTTATAAAGACACTTTGCTTTATTTTCATTAGCTCCAAAGCAAGGCCCCTGAGGGTTCGAAAGAC[A/G]TGTTCTACATTAACAGAAATGTTGAAAAATGCCAATTAGTGCCTAAGTACTTAGACAGCCGAGGATGTTATTAACGTGAACTTAATAATGTATGTGGGTGTGGGGCAGCGTTGTGGAACA	TGTTCCACAACGCTGCCCCACACCCACATACATTATTAAGTTCACGTTAATAACATCCTCGGCTGTCTAAGTACTTAGGCACTAATTGGCATTTTTCAACATTTCTGTTAATGTAGAACA[T/C]GTCTTTCGAACCCTCAGGGGCCTTGCTTTGGAGCTAATGAAAATAAAGCAAAGTGTCTTTATAAGAAAAAAAATTAggtcaggagcgttggctcacacctgtaataccagcactttggga	T	C	0.272761	0.00862255	0.727239	0.00862255	0.0785609	0.00543214	0.388399	0.00543214	0.53304	0.00543214	1362	2	0.318029	0.388399	0.396725	0.599766	0.438667	0.4497	107	529	726	0.931164	13	109675047	-20893	7	35	1282	intron	C/T	0.434836	0.168332	YES	2	2	2	1	reference
COL4A1_rs648705	COL4A1	http://www.ncbi.nlm.nih.gov/entrez/query.fcgi?db=gene&cmd=Retrieve&dopt=full_report&list_uids=1282	rs648705		http://www.ncbi.nlm.nih.gov/SNP/snp_ref.cgi?rs=648705	A	C	CTGGTAAAATAGAGTGTGCCTACAGTAAATTAAAACTATTTTTCTCTCTTTAGTATCTCTCATTCTGTGACGATTACAACAAAAATGAATAGATTTCATTTTGCTTTGCACACGCATGAC[A/C]CATGAAAATAAAGATCTCTGCAAAATGTAAGTTGGGGGCTAATTATTCTCCTTACAAAAGCCCAGATACTTGTCCCATCAACTGCACACTTCCTCGGAAAACAGAATCATTGATGAGTGG	CTGGTAAAATAGAGTGTGCCTACAGTAAATTAAAACTATTTTTCTCTCTTTAGTATCTCTCATTCTGTGACGATTACAACAAAAATGAATAGATTTCATTTTGCTTTGCACACGCATGAC[C/A]CATGAAAATAAAGATCTCTGCAAAATGTAAGTTGGGGGCTAATTATTCTCCTTACAAAAGCCCAGATACTTGTCCCATCAACTGCACACTTCCTCGGAAAACAGAATCATTGATGAGTGG	C	A	0.360499	0.00921417	0.639501	0.00921417	0.13069	0.0062501	0.459618	0.0062501	0.409692	0.0062501	1362	2	0.354782	0.459618	0.461079	0.0136728	0.906915	0.9085	178	626	558	0.805124	13	109654154	13269	7	35	1282	intron	A/C	0.491493	0.0646603	YES	2	2	2	1	reference
COL4A1_rs6492246	COL4A1	http://www.ncbi.nlm.nih.gov/entrez/query.fcgi?db=gene&cmd=Retrieve&dopt=full_report&list_uids=1282	rs6492246		http://www.ncbi.nlm.nih.gov/SNP/snp_ref.cgi?rs=6492246	A	G	TAGCTGTTTAAGTGCTTATTCTGTCCGTTTGCTCTGCTCTGGTTCCCATAATAACCTTGGACAGGGTACAGAGTATTAGATTATTCGTGTGCACTTTTATCTGGACAAAAGATTAAGAAC[A/G]TTAAAAAAATATGTGGGGAATGGCAAGAACCATGTCCATGGAGGAGTCACTTCCTTCTTAGCTCCTTCATTTCAAAGCTCTGGGGATACACAGATTGCTTAAACTTTCTGGTGACATTTG	CAAATGTCACCAGAAAGTTTAAGCAATCTGTGTATCCCCAGAGCTTTGAAATGAAGGAGCTAAGAAGGAAGTGACTCCTCCATGGACATGGTTCTTGCCATTCCCCACATATTTTTTTAA[C/T]GTTCTTAATCTTTTGTCCAGATAAAAGTGCACACGAATAATCTAATACTCTGTACCCTGTCCAAGGTTATTATGGGAACCAGAGCAGAGCAAACGGACAGAATAAGCACTTAAACAGCTA	C	T	0.191626	0.00892041	0.808374	0.00892041	0.0433498	0.00510707	0.296552	0.00510707	0.660099	0.00510707	1015	2	0.261819	0.296552	0.30981	1.859	0.17274	0.1942	44	301	670	0.643149	13	109667423	2151	7	35	1282	intron	C/T	0.481016	0.0955591	YES	2	2	2	1	reference
COL4A1_rs666338	COL4A1	http://www.ncbi.nlm.nih.gov/entrez/query.fcgi?db=gene&cmd=Retrieve&dopt=full_report&list_uids=1282	rs666338		http://www.ncbi.nlm.nih.gov/SNP/snp_ref.cgi?rs=666338	C	G	TGTGGCGAGGCCCCGCCGGGAGCTCCCTCCACACCATGAGGCTTGACGTCAGGGCAGGAATACTGCCACCACAGTTTGAGGGGGGACAGATGCAAGGAGATCCCCTAGAGGGTCTGCTTT[C/G]CCTAAGAGGAAGGCGTGAGTGCTCACTCTCCTTTGCTCTATGAGACATACAACTGAACTCTTAAAAGGATGTATATGTGTTCACTAGAAGTATGTGAATGAAATTTAACAGTGTGGATTG	TGTGGCGAGGCCCCGCCGGGAGCTCCCTCCACACCATGAGGCTTGACGTCAGGGCAGGAATACTGCCACCACAGTTTGAGGGGGGACAGATGCAAGGAGATCCCCTAGAGGGTCTGCTTT[C/G]CCTAAGAGGAAGGCGTGAGTGCTCACTCTCCTTTGCTCTATGAGACATACAACTGAACTCTTAAAAGGATGTATATGTGTTCACTAGAAGTATGTGAATGAAATTTAACAGTGTGGATTG	C	G	0.999633	0.000366972	0.000367107	0.000366972	0.999266	2.69436e-07	0.000734214	2.69436e-07			1362	2	0.000733676	0.000734214	0.000733945	0.000183688	0.989186	1	1361	1	0	0.873635	13	109669574	1983	7	35	1282	intron	C/G			YES	2	2	2	1	reference
COL4A1_rs675605	COL4A1	http://www.ncbi.nlm.nih.gov/entrez/query.fcgi?db=gene&cmd=Retrieve&dopt=full_report&list_uids=1282	rs675605		http://www.ncbi.nlm.nih.gov/SNP/snp_ref.cgi?rs=675605	C	G	CTGAGCCCATGATGAATTCTGGCACAATTCTAGGCTCAAGTATTCTAATATGAATTTTAACATTCACTATGAAGTTGACTGACAGAGCTGAACACTCAAGTCATATGTAATCCAAAGCTA[C/G]AAGGCGATGGTTACAAAGGAGATGCACAGTGAATATTTCTGATAGATCCACATTTACAAAGAAATAAAACCATAGATATTTTCTGATCCATGAAAATCCACTTTGCACATCAGCTTAAAA	CTGAGCCCATGATGAATTCTGGCACAATTCTAGGCTCAAGTATTCTAATATGAATTTTAACATTCACTATGAAGTTGACTGACAGAGCTGAACACTCAAGTCATATGTAATCCAAAGCTA[G/C]AAGGCGATGGTTACAAAGGAGATGCACAGTGAATATTTCTGATAGATCCACATTTACAAAGAAATAAAACCATAGATATTTTCTGATCCATGAAAATCCACTTTGCACATCAGCTTAAAA	G	C	0.709985	0.00890019	0.290015	0.00890019	0.51395	0.00568643	0.39207	0.00568643	0.0939794	0.00568643	1362	2	0.327018	0.39207	0.411812	3.13007	0.0768604	0.0729	700	534	128	0.940492	13	109671557	59830	7	35	1282	intron	C/G	0.440376	0.16204	YES	2	2	2	1	reference
COL4A1_rs679450	COL4A1	http://www.ncbi.nlm.nih.gov/entrez/query.fcgi?db=gene&cmd=Retrieve&dopt=full_report&list_uids=1282	rs679450		http://www.ncbi.nlm.nih.gov/SNP/snp_ref.cgi?rs=679450	C	G	CGGCCACGTTTTGTGGCTTACACAAGCCAGTTGATGGTGTCAAAGATGTTGTTGAGTTCTCTGGCCAAAGGATGTTCTGTTTTCTGAAAAAGTTTAGAGCTGCAGAATTGTTTTTATGCT[C/G]GAGTGGCTAAAAAAATGGGACACATGGTTGGGGTGAGGAGAAAAGCCATATTTTACTGATCCAAAGGAATTGGATCACTCCTGAAGCAAACAAAGTATAATACGGCGATCTAAGTAGATA	TATCTACTTAGATCGCCGTATTATACTTTGTTTGCTTCAGGAGTGATCCAATTCCTTTGGATCAGTAAAATATGGCTTTTCTCCTCACCCCAACCATGTGTCCCATTTTTTTAGCCACTC[G/C]AGCATAAAAACAATTCTGCAGCTCTAAACTTTTTCAGAAAACAGAACATCCTTTGGCCAGAGAACTCAACAACATCTTTGACACCATCAACTGGCTTGTGTAAGCCACAAAACGTGGCCG	G	C	0.553965	0.00948199	0.446035	0.00948199	0.304699	0.00669354	0.498532	0.00669354	0.196769	0.00669354	1362	2	0.372071	0.498532	0.494176	0.105824	0.74495	0.784	415	679	268	0.968327	13	109731387	-52301	7	35	1282	intron	C/G	0.49832	0.0289367	YES	2	2	2	1	reference
COL4A1_rs680484	COL4A1	http://www.ncbi.nlm.nih.gov/entrez/query.fcgi?db=gene&cmd=Retrieve&dopt=full_report&list_uids=1282	rs680484		http://www.ncbi.nlm.nih.gov/SNP/snp_ref.cgi?rs=680484	A	C	TTATTCCTAAAATCATTTTATCTGGGCATGTGAAGTGGACGCTAGTACTTGAAGTCACTCTATTTAAATCTTGCCTGACTTTCTTAACTAGCTGTTCTGATTTCTGTCCTCCTCTAGAGA[A/C]AATTGACCAGATGCCATTTCTTTGGGCTTCCTATTGGATAAGGCCGTGAACCCAAAGGGAGGGGGAAATAGATGATAATTTAGGAACATGGGAGTTGGTATAAGCATCCGTTTCCTTTCC	TTATTCCTAAAATCATTTTATCTGGGCATGTGAAGTGGACGCTAGTACTTGAAGTCACTCTATTTAAATCTTGCCTGACTTTCTTAACTAGCTGTTCTGATTTCTGTCCTCCTCTAGAGA[C/A]AATTGACCAGATGCCATTTCTTTGGGCTTCCTATTGGATAAGGCCGTGAACCCAAAGGGAGGGGGAAATAGATGATAATTTAGGAACATGGGAGTTGGTATAAGCATCCGTTTCCTTTCC	C	A	0.387215	0.00940765	0.612785	0.00940765	0.153564	0.00644157	0.467303	0.00644157	0.379133	0.00644157	1361	2	0.361956	0.467303	0.474559	0.318158	0.572717	0.5713	209	636	516	0.913162	13	109679086	-86005	7	35	1282	intron	A/C	0.430867	0.172589	YES	2	2	2	1	reference
COL4A1_rs686090	COL4A1	http://www.ncbi.nlm.nih.gov/entrez/query.fcgi?db=gene&cmd=Retrieve&dopt=full_report&list_uids=1282	rs686090		http://www.ncbi.nlm.nih.gov/SNP/snp_ref.cgi?rs=686090	A	T	ATCTGGTTTAATTTCATTATGAACACAGCACATACTACATATGCTTTCAATAATTGTGCATTTGTTAAAGTTTCTTTTATTCTTTCTTGGTGAGTGTTCCATGTACAATTGAAAAGAATA[A/T]GTATTCTATTAGTGTTGGATAGATTGTTATATAAATGTAGTTTATGATCCACTTGGTTGATGGTATTGTTCAGTTCTTTTATATCCCTGTGATTTTCTGTCTATAGTTCTGTCATTTATC	gataaatgacagaactatagacagaaaatcacagggatataaaagaactgaacaataccatcaaccaagtggatcataaactacatttatataacaatctatccaacactaatagaatac[A/T]tattcttttcaattgtacatggaacactcaccaagaaagaataaaagaaactttaacaaatgcacaattattgaaagcatatgtagtatgtgctgtgttcataatgaaattaaaccagat	A	T	0.0903084	0.00553795	0.909692	0.00553795	0.00954479	0.00237458	0.161527	0.00237458	0.828928	0.00237458	1362	2	0.150807	0.161527	0.164306	0.389451	0.532588	0.5046	13	220	1129	0.968314	13	109593081	108107	7	35	1282	locus-region, 3'	A/T	0.228532	0.249076	YES	2	2	2	1	reference
COL4A1_rs72509	COL4A1	http://www.ncbi.nlm.nih.gov/entrez/query.fcgi?db=gene&cmd=Retrieve&dopt=full_report&list_uids=1282	rs72509		http://www.ncbi.nlm.nih.gov/SNP/snp_ref.cgi?rs=72509	A	C	GACAACTCTATGGGTGGGAGATTCCTTCTCTGGAATTAGGGAGTTTGAGTTTCATTGAGAGAACGAAATGTCTCTCAAGTCTACATATTTGCCTGGAGCTGACACTTGGTTTGGGAGGGG[A/C]TCCGTGGGACCCGGATGCTGGGGACGCACTGGCCTTGCCCCACTGTGCTAGTGCGTCAGGCCAGTGACTCACAAGCACGGGAAGGCTCGCCCCAGGTCATGCCTCCCAACAGTGTTTCCA	TGGAAACACTGTTGGGAGGCATGACCTGGGGCGAGCCTTCCCGTGCTTGTGAGTCACTGGCCTGACGCACTAGCACAGTGGGGCAAGGCCAGTGCGTCCCCAGCATCCGGGTCCCACGGA[G/T]CCCCTCCCAAACCAAGTGTCAGCTCCAGGCAAATATGTAGACTTGAGAGACATTTCGTTCTCTCAATGAAACTCAAACTCCCTAATTCCAGAGAAGGAATCTCCCACCCATAGAGTTGTC	G	T	0.859765	0.00665731	0.140235	0.00665731	0.739354	0.00327616	0.240822	0.00327616	0.0198238	0.00327616	1362	2	0.212064	0.240822	0.241138	0.00233739	0.96144	0.9097	1007	328	27	0.820432	13	109701188	51887	7	35	1282	intron	G/T	0.293589	0.246171	YES	2	2	2	1	reference
COL4A1_rs7317784	COL4A1	http://www.ncbi.nlm.nih.gov/entrez/query.fcgi?db=gene&cmd=Retrieve&dopt=full_report&list_uids=1282	rs7317784		http://www.ncbi.nlm.nih.gov/SNP/snp_ref.cgi?rs=7317784	A	G	TAAAATAATGTTAGAGCATTGTTCTTCCTGCTATTATTAAGCAACCATGAAAAAATGTCAACTATAGAACAATACAAAAGACATATTCCTACCATTCTTATGCATACAATGAAAAGGGAT[A/G]TCAACCAGAGCATGTTTTAATGGTGAATTTCTTCTGAGTCTTTTGACACTGTAGGAATGACTTTGGGGTGAAGACTTTGATAGTCTGGTACACAGTGAGCTGGTTCCAGCCTCGTTTCCC	GGGAAACGAGGCTGGAACCAGCTCACTGTGTACCAGACTATCAAAGTCTTCACCCCAAAGTCATTCCTACAGTGTCAAAAGACTCAGAAGAAATTCACCATTAAAACATGCTCTGGTTGA[C/T]ATCCCTTTTCATTGTATGCATAAGAATGGTAGGAATATGTCTTTTGTATTGTTCTATAGTTGACATTTTTTCATGGTTGCTTAATAATAGCAGGAAGAACAATGCTCTAACATTATTTTA	C	T	0.657856	0.00903892	0.342144	0.00903892	0.43025	0.00608334	0.455213	0.00608334	0.114537	0.00608334	1362	2	0.34884	0.455213	0.450163	0.171405	0.678866	0.7168	586	620	156	0.928386	13	109753075	-59079	7	35	1282	intron	C/T	0.485843	0.0829349	YES	2	2	2	1	reference
COL4A1_rs913745	COL4A1	http://www.ncbi.nlm.nih.gov/entrez/query.fcgi?db=gene&cmd=Retrieve&dopt=full_report&list_uids=1282	rs913745		http://www.ncbi.nlm.nih.gov/SNP/snp_ref.cgi?rs=913745	A	T	GAGGTCTGCCTGCAGTTTCCATCCAAATTTCTAATCAACGTTGTGGTTTTATCATCCATTTCCGGAATCATTACCCCTTAAAATGTGAGGAAAACGACTCTCCTTTTCTTCAACTCCCCA[A/T]CTTTTCCAAATACCGCTGCGAGTTTTTGTTGCCAACAGCTTTTCCCAATGTGCGTGTACTTACCAACGTCCAGACTCCTC	GAGGTCTGCCTGCAGTTTCCATCCAAATTTCTAATCAACGTTGTGGTTTTATCATCCATTTCCGGAATCATTACCCCTTAAAATGTGAGGAAAACGACTCTCCTTTTCTTCAACTCCCCA[A/T]CTTTTCCAAATACCGCTGCGAGTTTTTGTTGCCAACAGCTTTTCCCAATGTGCGTGTACTTACCAACGTCCAGACTCCTC	A	T	0.212188	0.00791378	0.787812	0.00791378	0.0484581	0.00461992	0.32746	0.00461992	0.624082	0.00461992	1362	2	0.278441	0.32746	0.334328	0.574906	0.448316	0.4662	66	446	850	0.628454	13	109683981	-76117	7	35	1282	intron	A/T	0.312458	0.242072	YES	2	2	2	1	reference
COL4A1_rs9521624	COL4A1	http://www.ncbi.nlm.nih.gov/entrez/query.fcgi?db=gene&cmd=Retrieve&dopt=full_report&list_uids=1282	rs9521624		http://www.ncbi.nlm.nih.gov/SNP/snp_ref.cgi?rs=9521624	A	G	CTAAAATTTAGCTTTCGGACCTCCCTAAAGGGAAGAGCTGAGAAGGAACCTGTAAGTCCTGAGAAGTCGTGGAAACCACTAAGTTCAGTAACCGTGGAAACCTGCTTGCTCAGAGACAGG[A/G]ACAAAGGGGCAGCCTCTCTACGAGAGGGAAGTAGAGGCAGACTTGATGCAAAAGCAGCAGCTTCAAGTACATGCCTGGGAAGGTCCCTTCATGCTGAGCTTCGATGTGTCAACTAACAGG	CTAAAATTTAGCTTTCGGACCTCCCTAAAGGGAAGAGCTGAGAAGGAACCTGTAAGTCCTGAGAAGTCGTGGAAACCACTAAGTTCAGTAACCGTGGAAACCTGCTTGCTCAGAGACAGG[G/A]ACAAAGGGGCAGCCTCTCTACGAGAGGGAAGTAGAGGCAGACTTGATGCAAAAGCAGCAGCTTCAAGTACATGCCTGGGAAGGTCCCTTCATGCTGAGCTTCGATGTGTCAACTAACAGG	G	A	0.211087	0.00789281	0.788913	0.00789281	0.0477239	0.00459674	0.326725	0.00459674	0.625551	0.00459674	1362	2	0.277594	0.326725	0.333058	0.492402	0.482858	0.4716	65	445	852	0.812546	13	109607864	87581	7	35	1282	intron	A/G			YES	2	2	2	1	reference
COL4A1_rs9521666	COL4A1	http://www.ncbi.nlm.nih.gov/entrez/query.fcgi?db=gene&cmd=Retrieve&dopt=full_report&list_uids=1282	rs9521666		http://www.ncbi.nlm.nih.gov/SNP/snp_ref.cgi?rs=9521666	A	G	TCTTGGTGCTGTTACTGGTGTTACCCATCTAAGCAACCTTAAGTAACAACTGTAGATGGAAATCCAGTGGCACCGCGCACCTCAACCACAGTGCATTCGTGCACAACAGCACTGTGGGAC[A/G]AAGCTCCAAACAGGGAACTCGGCAATGATTACCTGACTGCTCCAGATCACAGAGTAGCCAGGGAAGAGCCGGGGACTCTGGGGAGTGCGCTGGCATCTGGCACCTGACACCTGGAGCCGT	TCTTGGTGCTGTTACTGGTGTTACCCATCTAAGCAACCTTAAGTAACAACTGTAGATGGAAATCCAGTGGCACCGCGCACCTCAACCACAGTGCATTCGTGCACAACAGCACTGTGGGAC[A/G]AAGCTCCAAACAGGGAACTCGGCAATGATTACCTGACTGCTCCAGATCACAGAGTAGCCAGGGAAGAGCCGGGGACTCTGGGGAGTGCGCTGGCATCTGGCACCTGACACCTGGAGCCGT	A	G	0.804699	0.00748934	0.195301	0.00748934	0.643172	0.00411449	0.323054	0.00411449	0.0337739	0.00411449	1362	2	0.264919	0.323054	0.314317	1.05243	0.304949	0.3475	876	440	46	0.852127	13	109695445	44533	7	35	1282	intron	A/G			YES	2	2	2	1	reference
COL4A1_rs9555682	COL4A1	http://www.ncbi.nlm.nih.gov/entrez/query.fcgi?db=gene&cmd=Retrieve&dopt=full_report&list_uids=1282	rs9555682		http://www.ncbi.nlm.nih.gov/SNP/snp_ref.cgi?rs=9555682	A	G	TTGCAGGCCTTGAGTTCACCGATTTCTTGGTCAGTTGTCAGTGTTTCCTCACCCAAGACAACGGATGAGATACTCCAAGTCGGTGCCCTTGCAGGTTCGTCCTTCACAGAATATGTAAAG[A/G]GTTCAACATGTTAGACGTTACACTGCAAATTACGCTATCTGTATTTTGGGTTAAAGTCCAAAAGCGCATAGAGAATACCCACAGCCACCTTCAGGGCTAAATACCAACATCTCAGGTTCC	TTGCAGGCCTTGAGTTCACCGATTTCTTGGTCAGTTGTCAGTGTTTCCTCACCCAAGACAACGGATGAGATACTCCAAGTCGGTGCCCTTGCAGGTTCGTCCTTCACAGAATATGTAAAG[A/G]GTTCAACATGTTAGACGTTACACTGCAAATTACGCTATCTGTATTTTGGGTTAAAGTCCAAAAGCGCATAGAGAATACCCACAGCCACCTTCAGGGCTAAATACCAACATCTCAGGTTCC	A	G	0.617193	0.00920813	0.382807	0.00920813	0.375459	0.00638532	0.483468	0.00638532	0.141073	0.00638532	1361	2	0.360888	0.483468	0.472531	0.72905	0.393191	0.4166	511	658	192	0.829067	13	109739978	154734	7	35	1282	intron	A/G			YES	2	2	2	1	reference
COL4A2_rs1018644	COL4A2	http://www.ncbi.nlm.nih.gov/entrez/query.fcgi?db=gene&cmd=Retrieve&dopt=full_report&list_uids=1284	rs1018644		http://www.ncbi.nlm.nih.gov/SNP/snp_ref.cgi?rs=1018644	A	G	TTGTTTTGTTTGCTGAGGATGCCACAGCATAGGTGTGTGATGCTCGTGGCCCAGAGTGAAGCTCAGATTTGACAAATTCCAGGGCACCCTCTGAGCTGGCCAGTCTGTGGCTGTGCTCAC[A/G]GCTCCCACTGAGTGTCCAGCTGCCAGCTCCTGTCATGCCAGGTACTTGAGGATTCCTAGCTTAGCTTATGACGTGGCCTCTAAACAGGACCTCATTTTTAAAATCACAGAAGTTTGTCTT	AAGACAAACTTCTGTGATTTTAAAAATGAGGTCCTGTTTAGAGGCCACGTCATAAGCTAAGCTAGGAATCCTCAAGTACCTGGCATGACAGGAGCTGGCAGCTGGACACTCAGTGGGAGC[C/T]GTGAGCACAGCCACAGACTGGCCAGCTCAGAGGGTGCCCTGGAATTTGTCAAATCTGAGCTTCACTCTGGGCCACGAGCATCACACACCTATGCTGTGGCATCCTCAGCAAACAAAACAA	C	T	0.157122	0.00692173	0.842878	0.00692173	0.0227606	0.00349419	0.268722	0.00349419	0.708517	0.00349419	1362	2	0.229791	0.268722	0.264869	0.288254	0.591342	0.6743	31	366	965	0.877093	13	109894712	-90778	7	35	1284	intron	C/T	0.206111	0.246117	YES	2	2	2	1	reference
COL4A2_rs1049906	COL4A2	http://www.ncbi.nlm.nih.gov/entrez/query.fcgi?db=gene&cmd=Retrieve&dopt=full_report&list_uids=1284	rs1049906		http://www.ncbi.nlm.nih.gov/SNP/snp_ref.cgi?rs=1049906	A	G	GATGTCTAGAAAGGTCTCCACTTCTGCCTGAGTTTTGCCAAACCCAGTGGTCTATAGGGATGTGGCAAAAGAATGACCTACCGCAGTGTGATTATCAGTGTTTTTTAAAATAAAGAGCAC[A/G]GTTTTGCCTTTAAAATAATTCACATCAACGGTATTTGGGAGAACATGGAGCTGGCATAACATTGGCGTAGAAAGCAGGGCCAGGCCCACCCACGGGGCCCTCGTGTGGGGACGGGTGCCT	AGGCACCCGTCCCCACACGAGGGCCCCGTGGGTGGGCCTGGCCCTGCTTTCTACGCCAATGTTATGCCAGCTCCATGTTCTCCCAAATACCGTTGATGTGAATTATTTTAAAGGCAAAAC[C/T]GTGCTCTTTATTTTAAAAAACACTGATAATCACACTGCGGTAGGTCATTCTTTTGCCACATCCCTATAGACCACTGGGTTTGGCAAAACTCAGGCAGAAGTGGAGACCTTTCTAGACATC	C	T	0.454882	0.00960821	0.545118	0.00960821	0.20858	0.00674433	0.492604	0.00674433	0.298817	0.00674433	1352	2	0.372956	0.492604	0.495929	0.0607789	0.805269	0.8324	282	666	404	0.585142	13	109963080	-176272	7	35	1284	mrna-utr	C/T	0.49426	0.053263	YES	2	2	2	1	reference
COL4A2_rs11069840	COL4A2	http://www.ncbi.nlm.nih.gov/entrez/query.fcgi?db=gene&cmd=Retrieve&dopt=full_report&list_uids=1284	rs11069840		http://www.ncbi.nlm.nih.gov/SNP/snp_ref.cgi?rs=11069840	C	G	TAGATGAATTCAAAAAAATGGGAAGCGAATATCAAAATGAAGTTGGACAAGTAGGTTTTTATAGGCTCCATAAAACAAAATGCATCTTAGAAGAGGCCTGGGAGGTGGGATAACAATAGC[C/G]GCCGCTGGAGGAGGGCTCCTGCGCGCTGCCCAGGGCTGGGCTTTCTTTCTGATCCTTACGACGACCTGGCCTAGTAGGCCTCATTTCATCTGTAAAGGACTATGTTGTGGAGGAAAGAGT	TAGATGAATTCAAAAAAATGGGAAGCGAATATCAAAATGAAGTTGGACAAGTAGGTTTTTATAGGCTCCATAAAACAAAATGCATCTTAGAAGAGGCCTGGGAGGTGGGATAACAATAGC[G/C]GCCGCTGGAGGAGGGCTCCTGCGCGCTGCCCAGGGCTGGGCTTTCTTTCTGATCCTTACGACGACCTGGCCTAGTAGGCCTCATTTCATCTGTAAAGGACTATGTTGTGGAGGAAAGAGT	G	C	0.075257	0.00503546	0.924743	0.00503546	0.0051395	0.00181055	0.140235	0.00181055	0.854626	0.00181055	1362	2	0.1295	0.140235	0.139187	0.0772483	0.781062	1	7	191	1164	0.882452	13	109786808	154433	7	35	1284	intron	C/G			YES	2	2	2	1	reference
COL4A2_rs11839503	COL4A2	http://www.ncbi.nlm.nih.gov/entrez/query.fcgi?db=gene&cmd=Retrieve&dopt=full_report&list_uids=1284	rs11839503		http://www.ncbi.nlm.nih.gov/SNP/snp_ref.cgi?rs=11839503	C	G	CTCACTGTCTTAGGGAAAACAGGACACCCCCAGGGATGATGGGTACAGCTGGCCCCACCCTTCCATTGTGGGACCACAGCTCCGAAATACCGTCTTCTGGTGATGGATGCAGGGGAGGCT[C/G]CACTCCAAAGCCTTTCTGGGCCCAGAGTTTAACAAAAACCAAAATGTTCAAAGGTAACAGCAAAAATAATTCTTGGGTGGGGGTAGCGTCTCTTCCCTGACACATTTTCAGTTGAACAAG	CTTGTTCAACTGAAAATGTGTCAGGGAAGAGACGCTACCCCCACCCAAGAATTATTTTTGCTGTTACCTTTGAACATTTTGGTTTTTGTTAAACTCTGGGCCCAGAAAGGCTTTGGAGTG[G/C]AGCCTCCCCTGCATCCATCACCAGAAGACGGTATTTCGGAGCTGTGGTCCCACAATGGAAGGGTGGGGCCAGCTGTACCCATCATCCCTGGGGGTGTCCTGTTTTCCCTAAGACAGTGAG	G	C	0.922907	0.00500157	0.0770925	0.00500157	0.848752	0.00145979	0.148311	0.00145979	0.00293686	0.00145979	1362	2	0.132174	0.148311	0.142299	2.43181	0.118896	0.1724	1156	202	4	0.888505	13	109941241	-157633	7	35	1284	intron	C/G			YES	2	2	2	1	reference
COL4A2_rs1556122	COL4A2	http://www.ncbi.nlm.nih.gov/entrez/query.fcgi?db=gene&cmd=Retrieve&dopt=full_report&list_uids=1284	rs1556122		http://www.ncbi.nlm.nih.gov/SNP/snp_ref.cgi?rs=1556122	A	G	CTGGATGTGGGATGGACACTGGGTCCCAGGACATCAGGGCTGCAAGAGGTGTGGGACTCCTAATGTTTTCCAAGAATAGGAAGGTGGAAGCATCTCAGATTTCATTAACAAAGAGTAAGC[A/G]GTGGTCCTTCTGTGATGATGAGAGGTACACCTCGAGGCAGGCAGCATTCAAAGAGGTACATTTCTGAGTAACCGGGCCAGTGGCCTTCAGGTGGTCACTACACCCCTGGAGGGGTCATAA	TTATGACCCCTCCAGGGGTGTAGTGACCACCTGAAGGCCACTGGCCCGGTTACTCAGAAATGTACCTCTTTGAATGCTGCCTGCCTCGAGGTGTACCTCTCATCATCACAGAAGGACCAC[C/T]GCTTACTCTTTGTTAATGAAATCTGAGATGCTTCCACCTTCCTATTCTTGGAAAACATTAGGAGTCCCACACCTCTTGCAGCCCTGATGTCCTGGGACCCAGTGTCCATCCCACATCCAG	C	T	0.68649	0.00879929	0.31351	0.00879929	0.46696	0.00579269	0.43906	0.00579269	0.0939794	0.00579269	1362	2	0.337802	0.43906	0.430443	0.545906	0.459995	0.4822	636	598	128	0.885062	13	109783608	5582	7	35	1284	intron	C/T	0.419262	0.183985	YES	2	2	2	1	reference
COL4A2_rs1556124	COL4A2	http://www.ncbi.nlm.nih.gov/entrez/query.fcgi?db=gene&cmd=Retrieve&dopt=full_report&list_uids=1284	rs1556124		http://www.ncbi.nlm.nih.gov/SNP/snp_ref.cgi?rs=1556124	A	G	AGGAAAGAATGCCTTGTTTCTGTCCCCTGAAGACGCAAGCTGAAAAAATGTCTGGCTGCTCTTCGCCGCCCTCCCAGGTTCTCTCCCACAGCCAAGAACGACTGGCTGCTGCCCTGAGCC[A/G]GGAGGTCACAACGCTTGTGGAGTAAGGAGCTCGGGTTTTTGTTTGGGGCTTTGTTTTGTTTTCTTAAGTATCTGCAGGACAATGTTTGGAAGAGTCGTATGCCCCA	AGGAAAGAATGCCTTGTTTCTGTCCCCTGAAGACGCAAGCTGAAAAAATGTCTGGCTGCTCTTCGCCGCCCTCCCAGGTTCTCTCCCACAGCCAAGAACGACTGGCTGCTGCCCTGAGCC[A/G]GGAGGTCACAACGCTTGTGGAGTAAGGAGCTCGGGTTTTTGTTTGGGGCTTTGTTTTGTTTTCTTAAGTATCTGCAGGACAATGTTTGGAAGAGTCGTATGCCCCA	A	G	0.793686	0.00777109	0.206314	0.00777109	0.63069	0.0044584	0.325991	0.0044584	0.0433186	0.0044584	1362	2	0.27387	0.325991	0.327497	0.0288075	0.865224	0.8722	859	444	59	0.826341	13	109789190	62770	7	35	1284	intron	A/G	0.325992	0.23817	YES	2	2	2	1	reference
COL4A2_rs1927343	COL4A2	http://www.ncbi.nlm.nih.gov/entrez/query.fcgi?db=gene&cmd=Retrieve&dopt=full_report&list_uids=1284	rs1927343		http://www.ncbi.nlm.nih.gov/SNP/snp_ref.cgi?rs=1927343	A	C	TTATAATAGCCCAAGTGGACTAAGACAGTAACTGATTCACAGAAATTTGGTTTTCAAGACGTTTTAGACCAAGAGAACCCCTAAACATATAGGTGGATGTAAGCTGGTTAACTTATCTTG[A/C]GCTGACTGTGCTGAGCATTATCAGTTTCTAATGATATCAAGCTACTTAGAAAGCAATGAAGCTGAAAGTTCTTCTAAAACAAAATGAGAACTTTGAAGAAGCTTTTTAAAAGTAAGTTTT	ttataatagcccaagtggactaagacaGTAACTGATTCACAGAAATTTGGTTTTCAAGACGTTTTAGACCAAGAGAACCCCTAAACATATAGGTGGATGTAAGCTGGTTAACTTATCTTG[A/C]GCTGACTGTGCTGAGCATTATCAGTTTCTAATGATATCAAGCTACTTAGAAAGCAATGAAGCTGAAAGTTCTTCTAAAACAAAATGAGAACTTTGAAGAAGCTTTTTAAAAGTAAGTTTT	A	C	0.672907	0.00873469	0.327093	0.00873469	0.440529	0.00586351	0.464758	0.00586351	0.0947137	0.00586351	1362	2	0.343315	0.464758	0.440206	4.23671	0.0395588	0.0427	600	633	129	0.955164	13	109851960	-43691	7	35	1284	intron	A/C	0.497934	0.0320764	YES	2	2	2	1	reference
COL4A2_rs2094700	COL4A2	http://www.ncbi.nlm.nih.gov/entrez/query.fcgi?db=gene&cmd=Retrieve&dopt=full_report&list_uids=1284	rs2094700		http://www.ncbi.nlm.nih.gov/SNP/snp_ref.cgi?rs=2094700	A	G	TACAGAAAAGGTACAGTAAAAAGAAAGTAAAAAGATGTAAAATGGGACTCCTGTGTAGGGCATTTACCATGAACGGAGCTTGCGGGACTTGGAAGTTGCTCTGTCTGCGTTGGGGAGTGC[A/G]GGGTGCGTGGATGTGAAGGCCTGGGGCGTGACCGCGCACCACTGTAGATCCATCAACACTGGGTCTTAGGCGGCCCTAAACTTACGTTTTCAATATTTTTCTTTCTTCAGTAATAAATTA	taatttattactgaagaaagaaaaatattgaaaacgtaagtttagggccgcctaagacccagtgttgatggatctacagtggtgcgcggtcacgccccaggccttcacatccacgcaccc[T/C]gcactccccaacgcagacagagcaacttccaagtcccgcaagctccgttcatggtaaatgccctacacaggagtcccattttacatctttttactttctttttactgtaccttttctgta	T	C	0.606828	0.00933655	0.393172	0.00933655	0.367107	0.00646186	0.479442	0.00646186	0.153451	0.00646186	1362	2	0.363327	0.479442	0.477175	0.0307285	0.860848	0.9083	500	653	209	0.703666	13	109808269	-26229	7	35	1284	intron	C/T	0.5		YES	2	2	2	1	reference
COL4A2_rs2274545	COL4A2	http://www.ncbi.nlm.nih.gov/entrez/query.fcgi?db=gene&cmd=Retrieve&dopt=full_report&list_uids=1284	rs2274545		http://www.ncbi.nlm.nih.gov/SNP/snp_ref.cgi?rs=2274545	A	C	GTCGTGTAAGTTGAGCGTGTGGCTTAGCTGCTTCCTATTTGTGGGGCTTTAGCAGGATTGTATGGGTGACAGTATCAGGTGACAGTTTCAGAGCCAACAA[A/C]ACACATCTGAGTTATCTTGAGGGTTTCTCCCACCCAGAACCCCCTGTGCTGTCCCACACATGAAATAACAATGAGTGACACCCCCACAGGTGAAATAACG	CGTTATTTCACCTGTGGGGGTGTCACTCATTGTTATTTCATGTGTGGGACAGCACAGGGGGTTCTGGGTGGGAGAAACCCTCAAGATAACTCAGATGTGT[G/T]TTGTTGGCTCTGAAACTGTCACCTGATACTGTCACCCATACAATCCTGCTAAAGCCCCACAAATAGGAAGCAGCTAAGCCACACGCTCAACTTACACGAC	G	T	0.714391	0.00855912	0.285609	0.00855912	0.505874	0.00547234	0.417034	0.00547234	0.0770925	0.00547234	1362	2	0.324811	0.417034	0.408073	0.656688	0.417732	0.4545	689	568	105	0.739643	13	109943311	8850	7	35	1284	intron	G/T	0.321722	0.239491	YES	2	2	2	1	reference
COL4A2_rs2281973	COL4A2	http://www.ncbi.nlm.nih.gov/entrez/query.fcgi?db=gene&cmd=Retrieve&dopt=full_report&list_uids=1284	rs2281973		http://www.ncbi.nlm.nih.gov/SNP/snp_ref.cgi?rs=2281973	A	G	AGTGATTCTGAACTTTTGTAGGGGGAATTTCTTTCTTTTTCTTTTTTCCCGATGAGACCTTCCCTAGATCCTTAATATATACAACAGGTACAGAGGATGAGCCGATGTCTCAGGCTGTTT[A/G]TGTCTCCTTATTAGGTGAAATACATGTTCTGGTTTGGGAACCCCTGCACCTCTTAAGGGGTTCCATGGAACAGACTTTGAGAGCTCCACAAGAAGACAGTGCTCATTCTCTTGGCAGGAC	AGTGATTCTGAACTTTTGTAGGGGGAATTTCTTTCTTTTTCTTTTTTCCCGATGAGACCTTCCCTAGATCCTTAATATATACAACAGGTACAGAGGATGAGCCGATGTCTCAGGCTGTTT[A/G]TGTCTCCTTATTAGGTGAAATACATGTTCTGGTTTGGGAACCCCTGCACCTCTTAAGGGGTTCCATGGAACAGACTTTGAGAGCTCCACAAGAAGACAGTGCTCATTCTCTTGGCAGGAC	A	G	0.332599	0.00895719	0.667401	0.00895719	0.107195	0.00599056	0.450808	0.00599056	0.441997	0.00599056	1362	2	0.345406	0.450808	0.443954	0.324607	0.568852	0.5854	146	614	602	0.959609	13	109928675	-29727	7	35	1284	intron	A/G	0.471818	0.115311	YES	2	2	2	1	reference
COL4A2_rs2296845	COL4A2	http://www.ncbi.nlm.nih.gov/entrez/query.fcgi?db=gene&cmd=Retrieve&dopt=full_report&list_uids=1284	rs2296845		http://www.ncbi.nlm.nih.gov/SNP/snp_ref.cgi?rs=2296845	A	C	TGATTCCATAAAAAGACACAAAATTGAAAGCCACAGACCTTCTCACTTGTTTGGAAGAATAGCAAGATTACTTTTATTTCTAGGTACCTTGGAATCATTTCTTTTAATACAAACCCCTCT[A/C]TCCTTTTTGTCTTTTGACAAGTTCATGCAATGTTACCTTGAAAAAGATACATTTACTGCCTCTTTTCCCTGAGGGAATCTGCTGGTTAGTCAACCTTTGACTTTAAGAAACCCTGGAATG	TGATTCCATAAAAAGACACAAAATTGAAAGCCACAGACCTTCTCACTTGTTTGGAAGAATAGCAAGATTACTTTTATTTCTAGGTACCTTGGAATCATTTCTTTTAATACAAACCCCTCT[C/A]TCCTTTTTGTCTTTTGACAAGTTCATGCAATGTTACCTTGAAAAAGATACATTTACTGCCTCTTTTCCCTGAGGGAATCTGCTGGTTAGTCAACCTTTGACTTTAAGAAACCCTGGAATG	C	A	0.544053	0.00959708	0.455947	0.00959708	0.298825	0.00672228	0.490455	0.00672228	0.21072	0.00672228	1362	2	0.373052	0.490455	0.496119	0.177489	0.67354	0.6992	407	668	287	0.929338	13	109898948	37308	7	35	1284	intron	A/C	0.481016	0.0955591	YES	2	2	2	1	reference
COL4A2_rs2296851	COL4A2	http://www.ncbi.nlm.nih.gov/entrez/query.fcgi?db=gene&cmd=Retrieve&dopt=full_report&list_uids=1284	rs2296851		http://www.ncbi.nlm.nih.gov/SNP/snp_ref.cgi?rs=2296851	A	G	GGCTGGCCCCCCTGGAATTACGGGATTCCCAGGATTCATAGGAAGCCGGGTGAGTGGGCGTCTTTTACTCCCCTTGTTCTGTGAGCTCCTCTCCCCTTTGCTTGTGAATGGACATGCTTT[A/G]GTCTGGAATTTGCTAGGGTGAGAGTGTCAGTGGCAGGTTCAGGGCAGCCTCAGGCTTGGTGGGGTCCACACAGCCCTGGAAGGAGCTGCTGCACTTGGACACCATGCAGATGTGATGTGA	TCACATCACATCTGCATGGTGTCCAAGTGCAGCAGCTCCTTCCAGGGCTGTGTGGACCCCACCAAGCCTGAGGCTGCCCTGAACCTGCCACTGACACTCTCACCCTAGCAAATTCCAGAC[T/C]AAAGCATGTCCATTCACAAGCAAAGGGGAGAGGAGCTCACAGAACAAGGGGAGTAAAAGACGCCCACTCACCCGGCTTCCTATGAATCCTGGGAATCCCGTAATTCCAGGGGGGCCAGCC	T	C	0.123715	0.00622586	0.876285	0.00622586	0.0124816	0.00272927	0.222467	0.00272927	0.765051	0.00272927	1362	2	0.193314	0.222467	0.216819	0.92407	0.336409	0.3856	17	303	1042	0.906884	13	109936256	-3475	7	35	1284	intron	C/T	0.192145	0.243214	YES	2	2	2	1	reference
COL4A2_rs3803229	COL4A2	http://www.ncbi.nlm.nih.gov/entrez/query.fcgi?db=gene&cmd=Retrieve&dopt=full_report&list_uids=1284	rs3803229		http://www.ncbi.nlm.nih.gov/SNP/snp_ref.cgi?rs=3803229	A	G	ATGGTGTCCCCGGAAATCCCTATTTTAGGTTCAGAATCTTCTCACTTGAGTTACATTGCC[A/G]AAATGTTACGGAGACGTGAGACTGAAATGTCCCATGCATTTTATTCATGTCTAACCCAGC	GCTGGGTTAGACATGAATAAAATGCATGGGACATTTCAGTCTCACGTCTCCGTAACATTT[C/T]GGCAATGTAACTCAAGTGAGAAGATTCTGAACCTAAAATAGGGATTTCCGGGGACACCAT	C	T	0.312041	0.00891345	0.687959	0.00891345	0.0991189	0.00583221	0.425844	0.00583221	0.475037	0.00583221	1362	2	0.337175	0.425844	0.429343	0.0904377	0.763621	0.7585	135	580	647	0.969793	13	109932781	-15384	7	35	1284	intron	C/T	0.396894	0.202292	YES	2	2	2	1	reference
COL4A2_rs3803230	COL4A2	http://www.ncbi.nlm.nih.gov/entrez/query.fcgi?db=gene&cmd=Retrieve&dopt=full_report&list_uids=1284	rs3803230		http://www.ncbi.nlm.nih.gov/SNP/snp_ref.cgi?rs=3803230	C	G	GGCGGGGGAGACACAGCAGTGTGAAGATGTGGGAGGAAGGCTGGGTGCACTCCAGGTTCCCTCCGTGCATTACCTGTGGGGCCTGGGGGTCCTGGCAGGCCTGGCAATCCCTTGGGCCCT[C/G]CTATGCAACCTGGGGACAGAAAGGAGAAAAGATGAGCCCAAGCAATCCTAAACACTGAGTCCCACGGCCTTGGGGATCCCCAAGGGCAAAAGCACGAGCTGTGCAAACCGGCTACCATTC	GGCGGGGGAGACACAGCAGTGTGAAGATGTGGGAGGAAGGCTGGGTGCACTCCAGGTTCCCTCCGTGCATTACCTGTGGGGCCTGGGGGTCCTGGCAGGCCTGGCAATCCCTTGGGCCCT[G/C]CTATGCAACCTGGGGACAGAAAGGAGAAAAGATGAGCCCAAGCAATCCTAAACACTGAGTCCCACGGCCTTGGGGATCCCCAAGGGCAAAAGCACGAGCTGTGCAAACCGGCTACCATTC	G	C	0.88583	0.00612075	0.11417	0.00612075	0.785609	0.00281235	0.200441	0.00281235	0.0139501	0.00281235	1362	2	0.181814	0.200441	0.202271	0.111534	0.738404	0.6841	1070	273	19	0.841951	13	109917397	-250	7	35	1284	coding-nonsynon	C/G	0.242015	0.249872	YES	2	2	2	1	reference
COL4A2_rs3803233	COL4A2	http://www.ncbi.nlm.nih.gov/entrez/query.fcgi?db=gene&cmd=Retrieve&dopt=full_report&list_uids=1284	rs3803233		http://www.ncbi.nlm.nih.gov/SNP/snp_ref.cgi?rs=3803233	A	T	AGTAACTTAATGATTTAATTCATCTTGGTTCTGATGTAAATAAAAGTTTAATTTCATTGTGTAATGAAATCAAAATATTCGTATAAAATGCAAACTAAGCCAGTCTAGTCAAATAAAAAC[A/T]GGCACTGTGCTGGCAAACAATTGATTCCCTCCTGCAGGGCAGTAGCCTGGGTGCAAACCGAGTTAATCTGGCTGCTACCCTGCAAGTCAGTGTGGATGCTTTTCTTTTGTCTGGAAGCAT	AGTAACTTAATGATTTAATTCATCTTGGTTCTGATGTAAATAAAAGTTTAATTTCATTGTGTAATGAAATCAAAATATTCGTATAAAATGCAAACTAAGCCAGTCTAGTCAAATAAAAAC[A/T]GGCACTGTGCTGGCAAACAATTGATTCCCTCCTGCAGGGCAGTAGCCTGGGTGCAAACCGAGTTAATCTGGCTGCTACCCTGCAAGTCAGTGTGGATGCTTTTCTTTTGTCTGGAAGCAT	A	T	0.48605	0.0095796	0.51395	0.0095796	0.236417	0.00676883	0.499266	0.00676883	0.264317	0.00676883	1362	2	0.374805	0.499266	0.499611	0.000649479	0.979668	1	322	680	360	0.923583	13	109917147	40482	7	35	1284	intron	A/T	0.475131	0.108702	YES	2	2	2	1	reference
COL4A2_rs387298	COL4A2	http://www.ncbi.nlm.nih.gov/entrez/query.fcgi?db=gene&cmd=Retrieve&dopt=full_report&list_uids=1284	rs387298		http://www.ncbi.nlm.nih.gov/SNP/snp_ref.cgi?rs=387298	A	G	GAAGGGTCTCTGGGATACTGGCTGTGTTCTGCCTCCTCGGTGCAGGTTACATCAGGCGTTCTGCCCCCGGGAAGCATGTTGCTGGCTCATGGTGCCTTCACATTCCTGCCTGTGCGCCCC[A/G]CCTCCACAATGAGTTTCTAAAGAACAACGGGGCAAAGGCCGCCAAGGATAAGGGCCAAAAATAGATCTAGGAACAGGGCCAAGGAGGCAGCCTAGCACCGGGCATGTTTGCTAAAGGTGG	GAAGGGTCTCTGGGATACTGGCTGTGTTCTGCCTCCTCGGTGCAGGTTACATCAGGCGTTCTGCCCCCGGGAAGCATGTTGCTGGCTCATGGTGCCTTCACATTCCTGCCTGTGCGCCCC[G/A]CCTCCACAATGAGTTTCTAAAGAACAACGGGGCAAAGGCCGCCAAGGATAAGGGCCAAAAATAGATCTAGGAACAGGGCCAAGGAGGCAGCCTAGCACCGGGCATGTTTGCTAAAGGTGG	G	A	0.690162	0.0089847	0.309838	0.0089847	0.482379	0.00584719	0.415565	0.00584719	0.102056	0.00584719	1362	2	0.336223	0.415565	0.427677	1.09236	0.295949	0.3168	657	566	139	0.67039	13	109957629	-70055	7	35	1284	intron	A/G	0.41336	0.189244	YES	2	2	2	1	reference
COL4A2_rs4255644	COL4A2	http://www.ncbi.nlm.nih.gov/entrez/query.fcgi?db=gene&cmd=Retrieve&dopt=full_report&list_uids=1284	rs4255644		http://www.ncbi.nlm.nih.gov/SNP/snp_ref.cgi?rs=4255644	A	G	TTCCCAACTCTTGAGCAGGGTGGGGCTTGGGTCCTGTGTCCTGGGTCCTGCATCCTGGGGCGGATTTGGCAGGCAGGACCACTGCCTTGTGGGGGAAATCAACCCAGGTGGCTGAGGCTC[A/G]AGTTATGAGTGACCGTTGACAAAAATGTCCTGGGAGACGGCAGGGAGGGCCTCTGTCCAGCTTCTGGACTGGAGCCCAGAGCAGGTTTGATCCACGTGGAGGTGCTCAATCTTCCGAGTC	TTCCCAACTCTTGAGCAGGGTGGGGCTTGGGTCCTGTGTCCTGGGTCCTGCATCCTGGGGCGGATTTGGCAGGCAGGACCACTGCCTTGTGGGGGAAATCAACCCAGGTGGCTGAGGCTC[G/A]AGTTATGAGTGACCGTTGACAAAAATGTCCTGGGAGACGGCAGGGAGGGCCTCTGTCCAGCTTCTGGACTGGAGCCCAGAGCAGGTTTGATCCACGTGGAGGTGCTCAATCTTCCGAGTC	G	A	0.275698	0.00855369	0.724302	0.00855369	0.0756241	0.00540556	0.400147	0.00540556	0.524229	0.00540556	1362	2	0.319626	0.400147	0.399377	0.00506365	0.943271	1	103	545	714	0.893391	13	109887574	34682	7	35	1284	intron	A/G	0.33821	0.233921	YES	2	2	2	1	reference
COL4A2_rs4284503	COL4A2	http://www.ncbi.nlm.nih.gov/entrez/query.fcgi?db=gene&cmd=Retrieve&dopt=full_report&list_uids=1284	rs4284503		http://www.ncbi.nlm.nih.gov/SNP/snp_ref.cgi?rs=4284503	A	G	AAAACATTCCCTTTTCCGTATCCATACATAGGAGTGCCGAGCCTGCCGTGTACTTGATCTTGTCCCACAGAATCACCTGCCAGTCTCATCGTTGCAGGCTTCTCTCCTGCATGCACAGCG[A/G]GGGTGGTGGTGACCTCAGAAGCCTTTCCTTCTGAGCACTGCGTGACTGTCAGCTGTGGGAGTTCATTCTGAGGCCATGTCAGGGCTGACTGCACCGAAAAAGGAAGTGACCTGATGAGAT	AAAACATTCCCTTTTCCGTATCCATACATAGGAGTGCCGAGCCTGCCGTGTACTTGATCTTGTCCCACAGAATCACCTGCCAGTCTCATCGTTGCAGGCTTCTCTCCTGCATGCACAGCG[A/G]GGGTGGTGGTGACCTCAGAAGCCTTTCCTTCTGAGCACTGCGTGACTGTCAGCTGTGGGAGTTCATTCTGAGGCCATGTCAGGGCTGACTGCACCGAAAAAGGAAGTGACCTGATGAGAT	A	G	0.503671	0.00961461	0.496329	0.00961461	0.255507	0.00677356	0.496329	0.00677356	0.248164	0.00677356	1362	2	0.374987	0.496329	0.499973	0.0723551	0.787938	0.7851	348	676	338	0.887405	13	109922256	-141836	7	35	1284	intron	A/G	0.485022	0.0852324	YES	2	2	2	1	reference
COL4A2_rs4447275	COL4A2	http://www.ncbi.nlm.nih.gov/entrez/query.fcgi?db=gene&cmd=Retrieve&dopt=full_report&list_uids=1284	rs4447275		http://www.ncbi.nlm.nih.gov/SNP/snp_ref.cgi?rs=4447275	A	G	TCTGTTTAAAGGACAAGACCAAGTGTGACAGATTCAAGTATATGTCTTTAAGTTGCCAAATGAACACTGTGTGTATTTTGCTTTTTGGTAAATACAAATTACTCTTCTGAAAATTTGGAA[A/G]CACTGTGACAGTTTTCTAATGAAATTAGACGGAGAATGAGTTTTACCATTAAGGACTCAAGGCTTTCCACGGCCCCTTTAACTGAGAATGGACCTTGATTTTGTTTTGCGAGTCACTCTT	TCTGTTTAAAGGACAAGACCAAGTGTGACAGATTCAAGTATATGTCTTTAAGTTGCCAAATGAACACTGTGTGTATTTTGCTTTTTGGTAAATACAAATTACTCTTCTGAAAATTTGGAA[A/G]CACTGTGACAGTTTTCTAATGAAATTAGACGGAGAATGAGTTTTACCATTAAGGACTCAAGGCTTTCCACGGCCCCTTTAACTGAGAATGGACCTTGATTTTGTTTTGCGAGTCACTCTT	A	G	0.571953	0.00945823	0.428047	0.00945823	0.325991	0.00663244	0.491924	0.00663244	0.182085	0.00663244	1362	2	0.369769	0.491924	0.489646	0.0294825	0.86367	0.9164	444	670	248	0.946493	13	109780420	176455	7	35	1284	intron	A/G	0.492188	0.0620098	YES	2	2	2	1	reference
COL4A2_rs445348	COL4A2	http://www.ncbi.nlm.nih.gov/entrez/query.fcgi?db=gene&cmd=Retrieve&dopt=full_report&list_uids=1284	rs445348		http://www.ncbi.nlm.nih.gov/SNP/snp_ref.cgi?rs=445348	A	G	GGCTGCAGGTGCACCAGGCCGTCCAGGGAGCCCGGGCCTGCCGGGTATGCCAGGCCGCAGCGTCAGCATCGGCTACCTCCTGGTGAAGCACAGCCAGACGGACCAGGAGCCCATGTGCCC[A/G]GTGGGCATGAACAAACTCTGGAGTGGATACAGCCTGCTGTACTTCGAGGGCCAGGAGAAGGCGCACAACCAGGACCTGGGTAGGTACCTCCCACCCGGCCCCCGTTGCCTGCTCAGGGCT	AGCCCTGAGCAGGCAACGGGGGCCGGGTGGGAGGTACCTACCCAGGTCCTGGTTGTGCGCCTTCTCCTGGCCCTCGAAGTACAGCAGGCTGTATCCACTCCAGAGTTTGTTCATGCCCAC[C/T]GGGCACATGGGCTCCTGGTCCGTCTGGCTGTGCTTCACCAGGAGGTAGCCGATGCTGACGCTGCGGCCTGGCATACCCGGCAGGCCCGGGCTCCCTGGACGGCCTGGTGCACCTGCAGCC	C	T	0.102423	0.00575607	0.897577	0.00575607	0.00881057	0.00232881	0.187225	0.00232881	0.803965	0.00232881	1362	2	0.166962	0.187225	0.183865	0.454774	0.500077	0.6612	12	255	1095	0.650581	13	109956875	-14888	7	35	1284	coding-synon	C/T	0.305355	0.243795	YES	2	2	2	1	reference
COL4A2_rs447049	COL4A2	http://www.ncbi.nlm.nih.gov/entrez/query.fcgi?db=gene&cmd=Retrieve&dopt=full_report&list_uids=1284	rs447049		http://www.ncbi.nlm.nih.gov/SNP/snp_ref.cgi?rs=447049	A	G	GGGCTGGGGGGAGACCTGAGAATTGGAGAGAAGCATGGGGGTGAATGAGAAGTGCCTCTTCGGTTGAGCCTCTGTCTCTCATATAGAAGCCGACGGTTTGTAAGGGATCCCTTTGCTTGC[A/G]TTGAATATGCAGAAACCCCTATGAACATCCTAGGTTAGAGAAGGAGAGCGGACAGTGGGCTGGCTTCCCACGCTGTTGCTGCTGCTGCTTTCTGTGTTTACTCAGCACCGGGGAATGCCA	GGGCTGGGGGGAGACCTGAGAATTGGAGAGAAGCATGGGGGTGAATGAGAAGTGCCTCTTCGGTTGAGCCTCTGTCTCTCATATAGAAGCCGACGGTTTGTAAGGGATCCCTTTGCTTGC[A/G]TTGAATATGCAGAAACCCCTATGAACATCCTAGGTTAGAGAAGGAGAGCGGACAGTGGGCTGGCTTCCCACGCTGTTGCTGCTGCTGCTTTCTGTGTTTACTCAGCACCGGGGAATGCCA	A	G	0.770191	0.00797797	0.229809	0.00797797	0.589574	0.00471335	0.361233	0.00471335	0.0491924	0.00471335	1362	2	0.291338	0.361233	0.353994	0.569678	0.450387	0.4885	803	492	67	0.66309	13	109941987	-61928	7	35	1284	intron	A/G			YES	2	2	2	1	reference
COL4A2_rs4512966	COL4A2	http://www.ncbi.nlm.nih.gov/entrez/query.fcgi?db=gene&cmd=Retrieve&dopt=full_report&list_uids=1284	rs4512966		http://www.ncbi.nlm.nih.gov/SNP/snp_ref.cgi?rs=4512966	A	G	ATTCGGTGCAGCTATGGTAATGTGGATGACTGAACATTGACTTTTGTGGGCAAGGTCTAATTGTTCTTATGGCTGATGGGGGTTATTCTGAACACCAACCCTATATTCAGCAACAAGGGT[A/G]AGACCTTTAATTTCCTATTGACCCAATCATATCTTTCCTAGAGTTAAAACAGAAATACTTTAGGATTTAAATTATTTTCAAAACCCAAATGAATGCTCTGTCAACCAACCCTCTAGTATG	CATACTAGAGGGTTGGTTGACAGAGCATTCATTTGGGTTTTGAAAATAATTTAAATCCTAAAGTATTTCTGTTTTAACTCTAGGAAAGATATGATTGGGTCAATAGGAAATTAAAGGTCT[C/T]ACCCTTGTTGCTGAATATAGGGTTGGTGTTCAGAATAACCCCCATCAGCCATAAGAACAATTAGACCTTGCCCACAAAAGTCAATGTTCAGTCATCCACATTACCATAGCTGCACCGAAT	C	T	0.522026	0.00952611	0.477974	0.00952611	0.270191	0.00676041	0.503671	0.00676041	0.226138	0.00676041	1362	2	0.374514	0.503671	0.49903	0.117821	0.73141	0.7423	368	686	308	0.961542	13	109880059	-5118	7	35	1284	intron	C/T	0.499974	0.00357033	YES	2	2	2	1	reference
COL4A2_rs4771678	COL4A2	http://www.ncbi.nlm.nih.gov/entrez/query.fcgi?db=gene&cmd=Retrieve&dopt=full_report&list_uids=1284	rs4771678		http://www.ncbi.nlm.nih.gov/SNP/snp_ref.cgi?rs=4771678	A	G	CAATTTCCACGATTAATCACAATACATACTCATGATCAGTTACGGTTACTTTCAAAACTACATTTTTTTTTTTGTTTTTAAAGAGCTATAATCTACAGGGAACATTATATGTAAACTATC[A/G]TCTACTGCCATGATAGCTAACAAAAGAAGTCATAGAGTTTAAGAAGAGAAAATATGGAATGTGAGAAAAAAATTATCCTAAATTACTAAAGTCATGTCATTGTGAAATGATAATACTGGG	CCCAGTATTATCATTTCACAATGACATGACTTTAGTAATTTAGGATAATTTTTTTCTCACATTCCATATTTTCTCTTCTTAAACTCTATGACTTCTTTTGTTAGCTATCATGGCAGTAGA[T/C]GATAGTTTACATATAATGTTCCCTGTAGATTATAGCTCTTTAAAAACAAAAAAAAAAATGTAGTTTTGAAAGTAACCGTAACTGATCATGAGTATGTATTGTGATTAATCGTGGAAATTG	T	C	0.292952	0.00851854	0.707048	0.00851854	0.0763583	0.00549937	0.433186	0.00549937	0.490455	0.00549937	1362	2	0.328455	0.433186	0.414262	2.84238	0.0918084	0.0975	104	590	668	0.829722	13	109874941	92011	7	35	1284	intron	C/T	0.364949	0.222006	YES	2	2	2	1	reference
COL4A2_rs4771685	COL4A2	http://www.ncbi.nlm.nih.gov/entrez/query.fcgi?db=gene&cmd=Retrieve&dopt=full_report&list_uids=1284	rs4771685		http://www.ncbi.nlm.nih.gov/SNP/snp_ref.cgi?rs=4771685	A	G	TCTGAAAGAGCTCCCAAGATGAAGCCATCTGAATAAGAAAGTGAGACAGTACTGGATAACAACCCAAAGAATAAATATCCACGAGTCCATTCTGAGTCCTCAGCCTTCCTCTCTAAGGAT[A/G]AACTGCTGTTCCCAGCACTCAGCGAGGTTCTCAAGGCTGAACGGTGTCCGAGGGAGAGTGACTTATGGGTGGCACATCTCCTGCACGGCCTGTGCCCAGCTGTGTGGGGCGGCTACAGCT	tctgaaagagctcccaagatgaagccatctgaataagaaagtgagacagtactggataacaacccaaagaataaatatccacgagtccattctgaGTCCTCAGCCTTCCTCTCTAAGGAT[G/A]AACTGCTGTTCCCAGCACTCAGCGAGGTTCTCAAGGCTGAACGGTGTCCGAGGGAGAGTGACTTATGGGTGGCACATCTCCTGCACGGCCTGTGCCCAGCTGTGTGGGGCGGCTACAGCT	G	A	0.575257	0.00954581	0.424743	0.00954581	0.334802	0.00662467	0.48091	0.00662467	0.184288	0.00662467	1362	2	0.369272	0.48091	0.488673	0.343659	0.557725	0.577	456	655	251	0.92645	13	109966952		7	35	1284	locus-region, 3'+E1520	A/G	0.396694	0.202437	YES	2	2	2	1	reference
COL4A2_rs4773155	COL4A2	http://www.ncbi.nlm.nih.gov/entrez/query.fcgi?db=gene&cmd=Retrieve&dopt=full_report&list_uids=1284	rs4773155		http://www.ncbi.nlm.nih.gov/SNP/snp_ref.cgi?rs=4773155	A	C	TGCTGCTGCCCAGCCAGGTGATGTTGGTGCGAGTATTCAACTCTTTACACTGTAGTTACATTTCTAAAACTGGGTTAAAATAGTTCTTACCTTATGCACGTGCCCAGAGGAGCAAGAAGA[A/C]ATTGGCTGTAGAGAGTTTAGCAATCTTAGCATTGCGGTGCTTGATCAACACTAGTTCACATCTACCTGGCTTTAGGTTGTTGTTTTTTAGGTCTTCATCCTCAATACCTAAAGAACTTGA	tgctgctgcccagccaggtgatgttggtgcgagtattcaactctttacactgtagttacatttctaaaactgggttaaaatagttcttaccttatGCACGTGCCCAGAGGAGCAAGAAGA[A/C]ATTGGCTGTAGAGAGTTTAGCAATCTTAGCATTGCGGTGCTTGATCAACACTAGTTCACATCTACCTGGCTTTAGGTTGTTGTTTTTTAGGTCTTCATCCTCAATACCTAAAGAACTTGA	A	C	0.418135	0.00946317	0.581865	0.00946317	0.175477	0.00659343	0.485316	0.00659343	0.339207	0.00659343	1362	2	0.368208	0.485316	0.486596	0.00943281	0.922629	0.9111	239	661	462	0.870112	13	109769067	50693	7	35	1284	intron	A/C	0.497424	0.0357925	YES	2	2	2	1	reference
COL4A2_rs4773172	COL4A2	http://www.ncbi.nlm.nih.gov/entrez/query.fcgi?db=gene&cmd=Retrieve&dopt=full_report&list_uids=1284	rs4773172		http://www.ncbi.nlm.nih.gov/SNP/snp_ref.cgi?rs=4773172	A	G	AGATTTTAAAGGTCTCACAATGATTGAAGCTCATCAGAGGGTGAGTGCTCCTTATCTGACATGCTTGGGACCAGAAGTGTTTTGGATTTGGGAGTTTTTTGAATTTTCAAATATCTGCAC[A/G]TACTTACTGGTTGAGCAACCCTAAACTGAAAAATCTGAAATCCAAAATGCTCCAACGAGATGACCTTTGAGTGCCAGGTCGGTGCTCAAAAGGGTTCTGATTTTGGAGCCCTTCAGATTT	aaatctgaagggctccaaaatcagaacccttttgagcaccgacctggcactcaaaggtcatctcgttggagcattttggatttcagatttttcagtttagggttgctcaaccagtaagta[T/C]gtgcagatatttgaaaattcaaaaaactcccaaatccaaaacacttctggtcccaagcatgtcagataaggagcactcaccctCTGATGAGCTTCAATCATTGTGAGACCTTTAAAATCT	T	C			1	0					1	1.49167e-154	1362	1	0	0	0	0			0	0	1362	0.867721	13	109819760	3359	7	35	1284	intron	C/T	0.0139853	0.0824441	YES	2	2	2	1	reference
COL4A2_rs4773173	COL4A2	http://www.ncbi.nlm.nih.gov/entrez/query.fcgi?db=gene&cmd=Retrieve&dopt=full_report&list_uids=1284	rs4773173		http://www.ncbi.nlm.nih.gov/SNP/snp_ref.cgi?rs=4773173	A	G	AAAATTGCCAACTTAAACTGTAGATATCATTCCATTGATTTATTTACAGAGCTTTAAATCTTATTTTGTGGCCACTACAGTGAAGCAAATATTATTTTAAAAGCTTCATATGAAATAATC[A/G]TTAGTAGCTTGTTCCATTTTAAAAATTGCAGGTGTTTCCTATGCCTTTGGGCAGGTTTTGTTGTTTGTCTTTTGTTTGTGTGTCTAAATTTCCCATTGTCTGGGATGTGCACACTGCATG	AAAATTGCCAACTTAAACTGTAGATATCATTCCATTGATTTATTTACAGAGCTTTAAATCTTATTTTGTGGCCACTACAGTGAAGCAAATATTATTTTAAAAGCTTCATATGAAATAATC[A/G]TTAGTAGCTTGTTCCATTTTAAAAATTGCAGGTGTTTCCTATGCCTTTGGGCAGGTTTTGTTGTTTGTCTTTTGTTTGTGTGTCTAAATTTCCCATTGTCTGGGATGTGCACACTGCATG	A	G	0.661527	0.00887045	0.338473	0.00887045	0.428047	0.00600078	0.46696	0.00600078	0.104993	0.00600078	1362	2	0.347547	0.46696	0.447818	2.48867	0.114669	0.1288	583	636	143	0.909457	13	109823119	39041	7	35	1284	intron	A/G	0.451454	0.148041	YES	2	2	2	1	reference
COL4A2_rs7140030	COL4A2	http://www.ncbi.nlm.nih.gov/entrez/query.fcgi?db=gene&cmd=Retrieve&dopt=full_report&list_uids=1284	rs7140030		http://www.ncbi.nlm.nih.gov/SNP/snp_ref.cgi?rs=7140030	A	G	CAATTTGTCCATCTGCTTTTGGCTTAATTATCGCTTCAGGAAGATCAGTGGAAAAGATGTATTCAGAGTCCAAGGTCATGTCTGTTCCTCAAGGGAAGTCTGTGTGGATGACAATGCCCT[A/G]TGGAACTCTTTTGAAAAGCCCCATATGACTCTTCTCTTTCATATACCAGCCAAATGGCCCAAACCTCTCTGTGCCTCAGTTTCCTCACCATAAAATGGGTACAATGACAGTACCTACCTC	CAATTTGTCCATCTGCTTTTGGCTTAATTATCGCTTCAGGAAGATCAGTGGAAAAGATGTATTCAGAGTCCAAGGTCATGTCTGTTCCTCAAGGGAAGTCTGTGTGGATGACAATGCCCT[A/G]TGGAACTCTTTTGAAAAGCCCCATATGACTCTTCTCTTTCATATACCAGCCAAATGGCCCAaacctctctgtgcctcagtttcctcaccataaaatgggtacaatgacagtacctacctc	A	G	0.244493	0.00807915	0.755507	0.00807915	0.0528634	0.00486733	0.38326	0.00486733	0.563877	0.00486733	1362	2	0.301192	0.38326	0.369433	1.90797	0.167188	0.194	72	522	768	0.837625	13	109862160	-33581	7	35	1284	intron	A/G	0.315377	0.2413	YES	2	2	2	1	reference
COL4A2_rs7319311	COL4A2	http://www.ncbi.nlm.nih.gov/entrez/query.fcgi?db=gene&cmd=Retrieve&dopt=full_report&list_uids=1284	rs7319311		http://www.ncbi.nlm.nih.gov/SNP/snp_ref.cgi?rs=7319311	A	G	AATGAAGAATTTCAACAGGGCTCATTAGGCTTTTGTTCTATCTGAGCAGAGTTTTCTGCTTTCTTGGCTAAAATAAGATGCATGCAGCTTTAATTGTATCTCCCTTTATTCAAGGTCTTC[A/G]CTGGCAACCTTAAGTATCAAGGATTTGCTGCTCAAATCATTTGTAAATAAAACTCAGATGTAAGGAAATACAGACAAGGGAGGACAAAAGTTTTGTCCAAAAAAATAGATATGGAACAAA	AATGAAGAATTTCAACAGGGCTCATTAGGCTTTTGTTCTATCTGAGCAGAGTTTTCTGCTTTCTTGGCTAAAATAAGATGCATGCAGCTTTAATTGTATCTCCCTTTATTCAAGGTCTTC[A/G]CTGGCAACCTTAAGTATCAAGGATTTGCTGCTCAAATCATTTGTAAATAAAACTCAGATGTAAGGAAATACAGACAAGGGAGGACAAAAGTTTTGTCCAAAAAAATAGATATGGAacaaa	A	G	0.671439	0.00922072	0.328561	0.00922072	0.461821	0.0060492	0.419236	0.0060492	0.118943	0.0060492	1362	2	0.343881	0.419236	0.441217	3.38035	0.0659779	0.0688	629	571	162	0.945287	13	109828579	-39293	7	35	1284	intron	A/G	0.481403	0.0946183	YES	2	2	2	1	reference
COL4A2_rs7322495	COL4A2	http://www.ncbi.nlm.nih.gov/entrez/query.fcgi?db=gene&cmd=Retrieve&dopt=full_report&list_uids=1284	rs7322495		http://www.ncbi.nlm.nih.gov/SNP/snp_ref.cgi?rs=7322495	A	G	TGTTAGGGAAGGTCCGTGGAAGGCACAGGCCTGCAGTACTGAAGGCAGAGGCATAACTGCCAACCACAAGTCACTGATTACAATCCAAGAGCACCATTTTCTTCCTTTTATGGGGCATAC[A/G]ACTCTTCCAAACATTGTCCTGCAGATACTTAAGAAAACAAAACAAAGCCCCAAACAAAAACCCGAGCTCCTTACTCCACAAGCGTTGTGACCTCCCGGCTCAGGGCAGCAGCCAGTCGTT	AACGACTGGCTGCTGCCCTGAGCCGGGAGGTCACAACGCTTGTGGAGTAAGGAGCTCGGGTTTTTGTTTGGGGCTTTGTTTTGTTTTCTTAAGTATCTGCAGGACAATGTTTGGAAGAGT[C/T]GTATGCCCCATAAAAGGAAGAAAATGGTGCTCTTGGATTGTAATCAGTGACTTGTGGTTGGCAGTTATGCCTCTGCCTTCAGTACTGCAGGCCTGTGCCTTCCACGGACCTTCCCTAACA	C	T	0.750367	0.00832694	0.249633	0.00832694	0.564611	0.00510363	0.371512	0.00510363	0.0638767	0.00510363	1362	2	0.304458	0.371512	0.374633	0.0944745	0.758564	0.7721	769	506	87	0.919344	13	109789286	122323	7	35	1284	intron	C/T			YES	2	2	2	1	reference
COL4A2_rs7323041	COL4A2	http://www.ncbi.nlm.nih.gov/entrez/query.fcgi?db=gene&cmd=Retrieve&dopt=full_report&list_uids=1284	rs7323041		http://www.ncbi.nlm.nih.gov/SNP/snp_ref.cgi?rs=7323041	A	C	TTGCCTTCGTGTCCACAGAGGCCCCAGGGATCCACGGGCTCGGTGCCTTTTGAGAAGCACTGAATTAAAAGTCAAGGTGGCTTCCTCTAAAACACAGTCGTTTAGGAGCCAAGCAGGTTA[A/C]TCCAGGTATGGAGGATAAAATTTTGTGATAATATTGAGAACAATAAATGGTATTTAATAGAAATTTGTTTCCTGCACTGAGGTTAAGGTTGAGAGAAAAAGATACTTTAGAGAGAAGCTG	CAGCTTCTCTCTAAAGTATCTTTTTCTCTCAACCTTAACCTCAGTGCAGGAAACAAATTTCTATTAAATACCATTTATTGTTCTCAATATTATCACAAAATTTTATCCTCCATACCTGGA[T/G]TAACCTGCTTGGCTCCTAAACGACTGTGTTTTAGAGGAAGCCACCTTGACTTTTAATTCAGTGCTTCTCAAAAGGCACCGAGCCCGTGGATCCCTGGGGCCTCTGTGGACACGAAGGCAA	T	G	0.391703	0.00945331	0.608297	0.00945331	0.15859	0.00646854	0.466226	0.00646854	0.375184	0.00646854	1362	2	0.362997	0.466226	0.476544	0.638446	0.424274	0.429	216	635	511	0.870525	13	109911609	-66258	7	35	1284	intron	G/T	0.495689	0.0462279	YES	2	2	2	1	reference
COL4A2_rs7326145	COL4A2	http://www.ncbi.nlm.nih.gov/entrez/query.fcgi?db=gene&cmd=Retrieve&dopt=full_report&list_uids=1284	rs7326145		http://www.ncbi.nlm.nih.gov/SNP/snp_ref.cgi?rs=7326145	A	C	GATTTGATTTTCAATTCAGAACAAATTCAAAACAAGTAAAAAAGATCTGATGGAATTAGCAGACACATGTCAAATTATCCACAGCTTCTTGCTGGAGACACATGGAAAGATAGGGTGCAG[A/C]ACGTCTCCGGGGACCCAGAGCTGGAGAACTCCTAGCAGCCTCCATTTTCTACAAAGCCACGGGTCCTCCACAGGGTTGGCCCTAGTGCCCAGAGGTCAACAGTGGAGACCTGTCTCCTCC	GATTTGATTTTCAATTCAGAACAAATTCAAAACAAGTAAAAAAGATCTGATGGAATTAGCAGACACATGTCAAATTATCCACAGCTTCTTGCTGGAGACACATGGAAAGATAGGGTGCAG[C/A]ACGTCTCCGGGGACCCAGAGCTGGAGAACTCCTAGCAGCCTCCATTTTCTACAAAGCCACGGGTCCTCCACAGGGTTGGCCCTAGTGCCCAGAGGTCAACAGTGGAGACCTGTCTCCTCC	C	A	0.301782	0.00886452	0.698218	0.00886452	0.0920564	0.0057511	0.419451	0.0057511	0.488493	0.0057511	1347	2	0.332622	0.419451	0.421419	0.029388	0.863886	0.8542	124	565	658	0.901331	13	109845351	-20910	7	35	1284	intron	A/C	0.442029	0.160077	YES	2	2	2	1	reference
COL4A2_rs7991436	COL4A2	http://www.ncbi.nlm.nih.gov/entrez/query.fcgi?db=gene&cmd=Retrieve&dopt=full_report&list_uids=1284	rs7991436		http://www.ncbi.nlm.nih.gov/SNP/snp_ref.cgi?rs=7991436	A	G	TGGCACCCTGGAATATCTCCAGCAATTATCCAGCTTGAGAGTTTTCAACTGAACTGAAGTTTTATTAATGTTCATCATAATCGTGTCACGTCCAATTTTAGTACTTGGTATGAATTAGAG[A/G]AAAAAGGAGAAAACGATGGCCCGTTGGGTCAGCATGCATTGTCATGATACCCAGCATTGATTGACAGCTTACGGTGGTCCCGGGGCGATGGGAGCACTTTACATCCATTCACACTTCCTC	TGGCACCCTGGAATATCTCCAGCAATTATCCAGCTTGAGAGTTTTCAACTGAACTGAAGTTTTATTAATGTTCATCATAATCGTGTCACGTCCAATTTTAGTACTTGGTATGAATTAGAG[G/A]AAAAAGGAGAAAACGATGGCCCGTTGGGTCAGCATGCATTGTCATGATACCCAGCATTGATTGACAGCTTACGGTGGTCCCGGGGCGATGGGAGCACTTTACATCCATTCACACTTCCTC	G	A	0.221733	0.00809425	0.778267	0.00809425	0.0550661	0.00481465	0.333333	0.00481465	0.611601	0.00481465	1362	2	0.285576	0.333333	0.345135	1.59244	0.206978	0.2183	75	454	833	0.913214	13	109824441	78473	7	35	1284	intron	A/G	0.455	0.143091	YES	2	2	2	1	reference
COL4A2_rs7994073	COL4A2	http://www.ncbi.nlm.nih.gov/entrez/query.fcgi?db=gene&cmd=Retrieve&dopt=full_report&list_uids=1284	rs7994073		http://www.ncbi.nlm.nih.gov/SNP/snp_ref.cgi?rs=7994073	A	G	GCCAACGCGCCCGGCCCAAAGTCTCTGTTTTAATTGTTTGTTTTTGGAAGATTACTTCTCTTTGACATATCTAGAAGGAAAATCATTAGAGTTATTAGAGGCAATGTCTTCTATTTAAAA[A/G]GTAGTAGTCACTTCTCTGTGTCTGTTTTATATTATAAAGTAAAATTTTAACTTAATATGCTTTCTACTTTCTCAATTTTTCTTCAATTAGAAAACCCACATATTCTCACATTATTCTGAA	gccaacgcgcccggccCAAAGTCTCTGTTTTAATTGTTTGTTTTTGGAAGATTACTTCTCTTTGACATATCTAGAAGGAAAATCATTAGAGTTATTAGAGGCAATGTCTTCTATTTAAAA[G/A]GTAGTAGTCACTTCTCTGTGTCTGTTTTATATTATAAAGTAAAATTTTAACTTAATATGCTTTCTACTTTCTCAATTTTTCTTCAATTAGAAAACCCACATATTCTCACATTATTCTGAA	G	A	0.817915	0.00740949	0.182085	0.00740949	0.669604	0.00405813	0.296623	0.00405813	0.0337739	0.00405813	1362	2	0.2535	0.296623	0.29786	0.0235173	0.87812	0.854	912	404	46	0.903768	13	109902914	43746	7	35	1284	intron	A/G	0.362188	0.223414	YES	2	2	2	1	reference
COL4A2_rs912947	COL4A2	http://www.ncbi.nlm.nih.gov/entrez/query.fcgi?db=gene&cmd=Retrieve&dopt=full_report&list_uids=1284	rs912947		http://www.ncbi.nlm.nih.gov/SNP/snp_ref.cgi?rs=912947	C	G	TCCTATCTTCAGATCAGTGCTGTGGAGCTCTGAGGCTAGGGGATTCTGGAGTTTCCAGCTGCTGGTGAGGGGAGAGGGCAGGCAGCAGATCCTGGAGAGTGAGATGTGATCTGCAAGCCT[C/G]GAGACATCCCTGCACCCCAGCAAAAGCCAGGGTTGCTGGCCTCCTTGGTCCTGACTTCCTCTCCTGTGGATGTCTGGTTCTAGCTTCATGGGGAATTGGCACTAGAAAAACTCAGGCCTT	AAGGCCTGAGTTTTTCTAGTGCCAATTCCCCATGAAGCTAGAACCAGACATCCACAGGAGAGGAAGTCAGGACCAAGGAGGCCAGCAACCCTGGCTTTTGCTGGGGTGCAGGGATGTCTC[C/G]AGGCTTGCAGATCACATCTCACTCTCCAGGATCTGCTGCCTGCCCTCTCCCCTCACCAGCAGCTGGAAACTCCAGAATCCCCTAGCCTCAGAGCTCCACAGCACTGATCTGAAGATAGGA	C	G	0.537078	0.00938467	0.462922	0.00938467	0.279736	0.00673009	0.514684	0.00673009	0.20558	0.00673009	1362	2	0.373621	0.514684	0.49725	1.67422	0.195695	0.2144	381	701	280	0.911278	13	109946660	-107861	7	35	1284	intron	C/G	0.442421	0.159607	YES	2	2	2	1	reference
COL4A2_rs9515201	COL4A2	http://www.ncbi.nlm.nih.gov/entrez/query.fcgi?db=gene&cmd=Retrieve&dopt=full_report&list_uids=1284	rs9515201		http://www.ncbi.nlm.nih.gov/SNP/snp_ref.cgi?rs=9515201	A	C	TAGGTGTGGGCGTGGCTCGGTGCTCCAGACACTACTTGAAAAGGGAAGGTTTCTGGGACTCCTGGCACCGCGGCCTCTCCTCTGCCCAAATTTCAAGATTTATTTTTACTCGTTGAACGA[A/C]AAAGAGAATGAGCCCTGTACTCTGTCATGCTCCAAACTGCTGCCCCATTTTTAGACCACAGAGCAAGATGAATGCTGTTGGAAGGAATGTGTTTATGAGAGAGACAGTTTTTAATCCATC	TAGGTGTGGGCGTGGCTCGGTGCTCCAGACACTACTTGAAAAGGGAAGGTTTCTGGGACTCCTGGCACCGCGGCCTCTCCTCTGCCCAAATTTCAAGATTTATTTTTACTCGTTGAACGA[A/C]AAAGAGAATGAGCCCTGTACTCTGTCATGCTCCAAACTGCTGCCCCATTTTTAGACCACAGAGCAAGATGAATGCTGTTGGAAGGAATGTGTTTATGAGAGAGACAGTTTTTAATCCATC	A	C	0.302351	0.00868852	0.697649	0.00868852	0.0859662	0.00566076	0.43277	0.00566076	0.481264	0.00566076	1361	2	0.332883	0.43277	0.42187	0.908579	0.340492	0.3725	117	589	655	0.930747	13	109838799	46765	7	35	1284	intron	A/C	0.495728	0.0460206	YES	2	2	2	1	reference
COL4A2_rs9515212	COL4A2	http://www.ncbi.nlm.nih.gov/entrez/query.fcgi?db=gene&cmd=Retrieve&dopt=full_report&list_uids=1284	rs9515212		http://www.ncbi.nlm.nih.gov/SNP/snp_ref.cgi?rs=9515212	A	G	CCCTTCTGCTTTTTGATGGAACAGCACAGTAAGTTGAATCAAGTCCTGCTCATGTGTGAAGAAGAAACTCTTCCTTCTTTACATTAATGCCATAGAAGAAGTCAAAAAAGGACAATTAGC[A/G]AGCAGTGGGCTTCTGGGAAAAAAAAGAAAGAAAAACATTGAAGATCCAAACACATAAAAATTTATAGCCCCATACAATGAAATATAACAAAATAATAAAAACAAGAAAAATCTGGGAAGA	CCCTTCTGCTTTTTGATGGAACAGCACAGTAAGTTGAATCAAGTCCTGCTCATGTGTGAAGAAGAAACTCTTCCTTCTTTACATTAATGCCATAGAAGAAGTCAAAAAAGGACAATTAGC[A/G]AGCAGTGGGCTTCTGGGAAAAAAAAGAAAGAAAAACATTGAAGATCCAAACACATAAAAATTTATAGCCCCATACAATGAAATATAACAAAATAATAAAAACAAGAAAAATCTGGGAAGA	A	G	0.582599	0.0095577	0.417401	0.0095577	0.345081	0.00659605	0.475037	0.00659605	0.179883	0.00659605	1362	2	0.368084	0.475037	0.486355	0.73759	0.390434	0.4036	470	647	245	0.874356	13	109885564	-109990	7	35	1284	intron	A/G	0.390067	0.207078	YES	2	2	2	1	reference
COL4A2_rs9521694	COL4A2	http://www.ncbi.nlm.nih.gov/entrez/query.fcgi?db=gene&cmd=Retrieve&dopt=full_report&list_uids=1284	rs9521694		http://www.ncbi.nlm.nih.gov/SNP/snp_ref.cgi?rs=9521694	A	T	GCCTTTAACAACTTAGGGAGGTAACAGGTGGGGAGGAATGTGCTTTTGACTTCATTTCAAAGAGAAAAAAATCTTCGGGTAAACTCTCCACAAAGCATTAGTGTCACTTTCTGTTTCTGA[A/T]CATTGGTTCTAAATGCTTATTAAAAATGCGTTGATTTCCGATTATTATTATGGACACATGTGGCTTAAACTTTGGTAAAAGGCTGAGCTAAGGTGGATGGTGTAAGAAAGTCCATCTTTG	CAAAGATGGACTTTCTTACACCATCCACCTTAGCTCAGCCTTTTACCAAAGTTTAAGCCACATGTGTCCATAATAATAATCGGAAATCAACGCATTTTTAATAAGCATTTAGAACCAATG[A/T]TCAGAAACAGAAAGTGACACTAATGCTTTGTGGAGAGTTTACCCGAAGATTTTTTTCTCTTTGAAATGAAGTCAAAAGCACATTCCTCCCCACCTGTTACCTCCCTAAGTTGTTAAAGGC	A	T	0.157489	0.00717386	0.842511	0.00717386	0.0323054	0.00393318	0.250367	0.00393318	0.717327	0.00393318	1362	2	0.230161	0.250367	0.265372	4.35467	0.0369076	0.0382	44	341	977	0.962327	13	109775574	39472	7	35	1284	intron	A/T	0.193194	0.243461	YES	2	2	2	1	reference
COL4A2_rs9521718	COL4A2	http://www.ncbi.nlm.nih.gov/entrez/query.fcgi?db=gene&cmd=Retrieve&dopt=full_report&list_uids=1284	rs9521718		http://www.ncbi.nlm.nih.gov/SNP/snp_ref.cgi?rs=9521718	A	G	CCAATCTCCGTTGAGTTTGGAGCCAGGGGTAGAGGGAGGATCTGGGGAGAGTGGAGAGACAGGAAACTCATAGCAAATGTGTAAGACTATTCTAGATAGTAAATCCTAGATGAAAAGAAA[A/G]CACAATATAAAGTCAGGGTTTCATGAAAGTAAGACCAAGATGGGTGACCTATTGGGCTTATATATTCACAAAAAGAATATTTTCTGAAACTTGGAGCTTCAGAGCATAATGTGGCTCTTT	AAAGAGCCACATTATGCTCTGAAGCTCCAAGTTTCAGAAAATATTCTTTTTGTGAATATATAAGCCCAATAGGTCACCCATCTTGGTCTTACTTTCATGAAACCCTGACTTTATATTGTG[C/T]TTTCTTTTCATCTAGGATTTACTATCTAGAATAGTCTTACACATTTGCTATGAGTTTCCTGTCTCTCCACTCTCCCCAGATCCTCCCTCTACCCCTGGCTCCAAACTCAACGGAGATTGG	C	T	0.403818	0.00912319	0.596182	0.00912319	0.149046	0.00648303	0.509545	0.00648303	0.34141	0.00648303	1362	2	0.365578	0.509545	0.481498	4.62119	0.0315793	0.036	203	694	465	0.961866	13	109815046	964	7	35	1284	intron	C/T			YES	1	1	1	1	reference
COL4A2_rs9521720	COL4A2	http://www.ncbi.nlm.nih.gov/entrez/query.fcgi?db=gene&cmd=Retrieve&dopt=full_report&list_uids=1284	rs9521720		http://www.ncbi.nlm.nih.gov/SNP/snp_ref.cgi?rs=9521720	C	G	ACATGACTTCTTTAAAGGAGTCTCCTGAGGGCTTCACACCTTGCTCAAATGGGCCTTCCAGAGCTTTGCACACCCCTCCCCCTACCCTTCTCTCTGAACCTGCCCTTTCTCCACGCAATG[C/G]CCTTGGCTCTCCAAGAGTCACCCTGGCCCCATTGCAGCCCCTGCTGCTGGGGCATCCTCCCCGGTTCATTGACTCCTTCCTTCTCTTACACCAGTGCCTTACATGCAGTTGCTGATAGAA	ACATGACTTCTTTAAAGGAGTCTCCTGAGGGCTTCACACCTTGCTCAAATGGGCCTTCCAGAGCTTTGCACACCCCTCCCCCTACCCTTCTCTCTGAACCTGCCCTTTCTCCACGCAATG[G/C]CCTTGGCTCTCCAAGAGTCACCCTGGCCCCATTGCAGCCCCTGCTGCTGGGGCATCCTCCCCGGTTCATTGACTCCTTCCTTCTCTTACACCAGTGCCTTACATGCAGTTGCTGATAGAA	G	C	0.40338	0.00913416	0.59662	0.00913416	0.149155	0.00648455	0.50845	0.00648455	0.342395	0.00648455	1361	2	0.36549	0.50845	0.481329	4.32087	0.0376476	0.0402	203	692	466	0.780438	13	109816010	63	7	35	1284	intron	C/G			YES	2	2	2	1	reference
COL4A2_rs9521721	COL4A2	http://www.ncbi.nlm.nih.gov/entrez/query.fcgi?db=gene&cmd=Retrieve&dopt=full_report&list_uids=1284	rs9521721		http://www.ncbi.nlm.nih.gov/SNP/snp_ref.cgi?rs=9521721	A	G	CTTTGCACACCCCTCCCCCTACCCTTCTCTCTGAACCTGCCCTTTCTCCACGCAATGGCCTTGGCTCTCCAAGAGTCACCCTGGCCCCATTGCAGCCCCTGCTGCTGGGGCATCCTCCCC[A/G]GTTCATTGACTCCTTCCTTCTCTTACACCAGTGCCTTACATGCAGTTGCTGATAGAAAATACATATTTGAGCGTTGAAGGAATGTAAAACTCCATTGCTAAAACGAAGCTAGGGCCTTTC	CTTTGCACACCCCTCCCCCTACCCTTCTCTCTGAACCTGCCCTTTCTCCACGCAATGGCCTTGGCTCTCCAAGAGTCACCCTGGCCCCATTGCAGCCCCTGCTGCTGGGGCATCCTCCCC[G/A]GTTCATTGACTCCTTCCTTCTCTTACACCAGTGCCTTACATGCAGTTGCTGATAGAAAATACATATTTGAGCGTTGAAGGAATGTAAAACTCCATTGCTAAAACGAAGCTAGGGCCTTTC	G	A	0.403818	0.00912319	0.596182	0.00912319	0.149046	0.00648303	0.509545	0.00648303	0.34141	0.00648303	1362	2	0.365578	0.509545	0.481498	4.62119	0.0315793	0.037	203	694	465	0.818301	13	109816073	4071	7	35	1284	intron	A/G			YES	2	2	2	1	reference
COL4A2_rs9521724	COL4A2	http://www.ncbi.nlm.nih.gov/entrez/query.fcgi?db=gene&cmd=Retrieve&dopt=full_report&list_uids=1284	rs9521724		http://www.ncbi.nlm.nih.gov/SNP/snp_ref.cgi?rs=9521724	A	G	ATGGAAAAGATTCAATAAATCATGTTCTTCCCTATGCTGTGCTGCGATCAATGAATTGAAGAAAGTGGGGCTGGACAGGGGGCTGGTGGGTGGATGATGGGAGAGAAGGCTCATCTGTGC[A/G]ATGGGGAGCTTTGGGGTGAGGCTGGCTGGAGTCACCTGAGTATCATTGAGGTATCTGAGTTAGTGCGTATTTGTAAGCTGAGGCGGGAAGGGTGGGATTGCTGCAGAGAAGTCGGCACGT	ACGTGCCGACTTCTCTGCAGCAATCCCACCCTTCCCGCCTCAGCTTACAAATACGCACTAACTCAGATACCTCAATGATACTCAGGTGACTCCAGCCAGCCTCACCCCAAAGCTCCCCAT[T/C]GCACAGATGAGCCTTCTCTCCCATCATCCACCCACCAGCCCCCTGTCCAGCCCCACTTTCTTCAATTCATTGATCGCAGCACAGCATAGGGAAGAACATGATTTATTGAATCTTTTCCAT	T	C	0.362702	0.0092092	0.637298	0.0092092	0.131424	0.00626274	0.462555	0.00626274	0.406021	0.00626274	1362	2	0.355439	0.462555	0.462298	0.000419602	0.983657	1	179	630	553	0.801267	13	109820144	2831	7	35	1284	intron	C/T			YES	2	2	2	1	reference
COL4A2_rs9521725	COL4A2	http://www.ncbi.nlm.nih.gov/entrez/query.fcgi?db=gene&cmd=Retrieve&dopt=full_report&list_uids=1284	rs9521725		http://www.ncbi.nlm.nih.gov/SNP/snp_ref.cgi?rs=9521725	A	G	GTTTCAAATCTGGAGACATTTTACTCTTTGTGTATCATTGCCTTTCTTTTTTAATGTGTGTTATTTCTGGAAGGCAGGCAAGCTTTTTTCTTGTTTGTAAAGATCTCTTCTCCTGTTGCC[A/G]AGAGAGATAACCTGAAAAGACAGAAAATTGCCAACTTAAACTGTAGATATCATTCCATTGATTTATTTACAGAGCTTTAAATCTTATTTTGTGGCCACTACAGTGAAGCAAATATTATTT	GTTTCAAATCTGGAGACATTTTACTCTTTGTGTATCATTGCCTTTCTTTTTTAATGTGTGTTATTTCTGGAAGGCAGGCAAGCTTTTTTCTTGTTTGTAAAGATCTCTTCTCCTGTTGCC[A/G]AGAGAGATAACCTGAAAAGACAGAAAATTGCCAACTTAAACTGTAGATATCATTCCATTGATTTATTTACAGAGCTTTAAATCTTATTTTGTGGCCACTACAGTGAAGCAAATATTATTT	A	G	0.881424	0.00623434	0.118576	0.00623434	0.778267	0.00293244	0.206314	0.00293244	0.0154185	0.00293244	1362	2	0.187184	0.206314	0.209031	0.23005	0.631487	0.6095	1060	281	21	0.968809	13	109822975	3503	7	35	1284	intron	A/G			YES	2	2	2	1	reference
COL4A2_rs9521726	COL4A2	http://www.ncbi.nlm.nih.gov/entrez/query.fcgi?db=gene&cmd=Retrieve&dopt=full_report&list_uids=1284	rs9521726		http://www.ncbi.nlm.nih.gov/SNP/snp_ref.cgi?rs=9521726	A	G	TCCTTACTTATACCTTACCTAGTTCTTCTCAGTCAGATCAGAAGTGATACATAAGAGATTTAGGAATGCATTTCGTACTGTCATGAACAAGCAGGAGGCCACTCTGCACTGCAAGCTATC[A/G]TGTCTCCCCAAATATCCCTAAGCCAGTGAATGTCAGATAGTTCTTTCCTTAGCAAAAATTTTGTTCAGCTGAAATAGACACTGTGATTCTACTGGTGCTTACTCTGCATAATGATGTATA	TATACATCATTATGCAGAGTAAGCACCAGTAGAATCACAGTGTCTATTTCAGCTGAACAAAATTTTTGCTAAGGAAAGAACTATCTGACATTCACTGGCTTAGGGATATTTGGGGAGACA[C/T]GATAGCTTGCAGTGCAGAGTGGCCTCCTGCTTGTTCATGACAGTACGAAATGCATTCCTAAATCTCTTATGTATCACTTCTGATCTGACTGAGAAGAACTAGGTAAGGTATAAGTAAGGA	C	T			1	0					1	1.49167e-154	1362	1	0	0	0	0			0	0	1362	0.657272	13	109826478	1113	7	35	1284	intron	C/T			NO	2	2	2	1	reference
COL4A2_rs9521727	COL4A2	http://www.ncbi.nlm.nih.gov/entrez/query.fcgi?db=gene&cmd=Retrieve&dopt=full_report&list_uids=1284	rs9521727		http://www.ncbi.nlm.nih.gov/SNP/snp_ref.cgi?rs=9521727	A	C	ACCTGAAAGCTAGGGTGGGGGTGGGGAGACTTGCTTATACCACCATGCCAGCTGTAGCATTCTGCTCATGGTCACCAGAGTGCATTGTCAGATGTTTCTTGGTTAGGACATCTGCATTCT[A/C]CATGCAACAGGTGCCATCTCTGCCCTTGCTTGGGGTCAGAGTGCTTTAATCCAGATGCAGTATTGGTTGCATCTGTCATTATCGGCTCATCTGCAGCTGTCCTTCCTGTGTGGTGAGCCT	ACCTGAAAGCTAGGGTGGGGGTGGGGAGACTTGCTTATACCACCATGCCAGCTGTAGCATTCTGCTCATGGTCACCAGAGTGCATTGTCAGATGTTTCTTGGTTAGGACATCTGCATTCT[A/C]CATGCAACAGGTGCCATCTCTGCCCTTGCTTGGGGTCAGAGTGCTTTAATCCAGATGCAGTATTGGTTGCATCTGTCATTATCGGCTCATCTGCAGCTGTCCTTCCTGTGTGGTGAGCCT	A	C			1	0					1	1.49167e-154	1362	1	0	0	0	0			0	0	1362	0.871421	13	109827591	348	7	35	1284	intron	A/C			YES	2	2	2	1	reference
COL4A2_rs9521728	COL4A2	http://www.ncbi.nlm.nih.gov/entrez/query.fcgi?db=gene&cmd=Retrieve&dopt=full_report&list_uids=1284	rs9521728		http://www.ncbi.nlm.nih.gov/SNP/snp_ref.cgi?rs=9521728	A	G	GGACCCCGCACATCCCTGCAGCTGCTCCTGGGTGTGCCCACCCCACCCCCACTGGGATTTGAGCTCCCCTCAACTAATGGGCTTTCCATGGGGAATCAGGAGGGTGGGAATTGTGATTCC[A/G]TTAAAATCATTTGACTCAGGAAAAGCTTTTCGAAATAATCCCCAAGGACCAACTCTTTACAGAAACTCCTCCCCCGCCTTCATATTTTTGGCTTTGACTATGGGGAAATTCATTATGTTG	GGACCCCGCACATCCCTGCAGCTGCTCCTGGGTGTGCCCACCCCACCCCCACTGGGATTTGAGCTCCCCTCAACTAATGGGCTTTCCATGGGGAATCAGGAGGGTGGGAATTGTGATTCC[G/A]TTAAAATCATTTGACTCAGGAAAAGCTTTTCGAAATAATCCCCAAGGACCAACTCTTTACAGAAACTCCTCCCCCGCCTTCATATTTTTGGCTTTGACTATGGGGAAATTCATTATGTTG	G	A	0.981278	0.00262399	0.0187225	0.00262399	0.963289	0.000713242	0.0359765	0.000713242	0.000734214	0.000713242	1362	2	0.0360688	0.0359765	0.0367439	0.594037	0.440862	0.3755	1312	49	1	0.934127	13	109827939	4604	7	35	1284	intron	A/G			YES	2	2	2	1	reference
COL4A2_rs9521733	COL4A2	http://www.ncbi.nlm.nih.gov/entrez/query.fcgi?db=gene&cmd=Retrieve&dopt=full_report&list_uids=1284	rs9521733		http://www.ncbi.nlm.nih.gov/SNP/snp_ref.cgi?rs=9521733	A	G	GCTGTGGAAAGAATTTATTCTAATTGGCTAATCAACAAGGATGCTATAGCACTATGCAGCTGTTTATGAGAAAAAACTGTCCTCAAATACTTGTCCACCATAATTGCTTTGTTTGAAGAC[A/G]TTTGGAATGGAGAGGTTTAGTAATGGATAGAAGGGATTGTTTTTTTCTCTATTTATGATTCGATGAATGGAAATCCTTTTAGACTGGCTAAACTACTTCTATTTTCTGATCTTAAAGTAG	CTACTTTAAGATCAGAAAATAGAAGTAGTTTAGCCAGTCTAAAAGGATTTCCATTCATCGAATCATAAATAGAGAAAAAAACAATCCCTTCTATCCATTACTAAACCTCTCCATTCCAAA[T/C]GTCTTCAAACAAAGCAATTATGGTGGACAAGTATTTGAGGACAGTTTTTTCTCATAAACAGCTGCATAGTGCTATAGCATCCTTGTTGATTAGCCAATTAGAATAAATTCTTTCCACAGC	T	C	0.626285	0.00904542	0.373715	0.00904542	0.381057	0.00629329	0.490455	0.00629329	0.128488	0.00629329	1362	2	0.358543	0.490455	0.468104	3.10516	0.0780446	0.0821	519	668	175	0.941791	13	109832543	28138	7	35	1284	intron	C/T	0.475545	0.107839	YES	2	2	2	1	reference
COL4A2_rs9521783	COL4A2	http://www.ncbi.nlm.nih.gov/entrez/query.fcgi?db=gene&cmd=Retrieve&dopt=full_report&list_uids=1284	rs9521783		http://www.ncbi.nlm.nih.gov/SNP/snp_ref.cgi?rs=9521783	A	G	ATGCCACTCCTGGTGTATCCCCAAGAGACTTGAAAGCACGTGTCCACACAAACACACATACACCAATGTTCACAGCAGCATTCTTCAAAATAGGCAGAAGGTGAAACTATCCAAATGTGC[A/G]TCACCTGATGAATGGATCAGCTAAATCTATACAGCATCTATACCACAGAATAGCCCTGACCTTCACGTGGGAGCAAGGTGCTGAGCCATACCACACTGTGGATGAACCTGGAACATGTTA	atgccactcctggtgtatccccaagagacttgaaagcacgtgtccacacaaacacacatacaccaatgttcacagcagcattcttcaaaataggcagaaggtgaaactatccaaatgtgc[G/A]tcacctgatgaatggatcagctaaatctatacagcatctataccacagaatagccctgaccttcacgtgggagcaaggtgctgagccataccacactgtggatgaacctggaacatgtta	G	A	0.089207	0.0055145	0.910793	0.0055145	0.00954479	0.00237307	0.159325	0.00237307	0.831131	0.00237307	1362	2	0.149295	0.159325	0.162498	0.519557	0.471031	0.4948	13	217	1132	0.959664	13	109909671	-52577	7	35	1284	intron	A/G	0.1642	0.234816	YES	2	2	2	1	reference
COL4A2_rs9559792	COL4A2	http://www.ncbi.nlm.nih.gov/entrez/query.fcgi?db=gene&cmd=Retrieve&dopt=full_report&list_uids=1284	rs9559792		http://www.ncbi.nlm.nih.gov/SNP/snp_ref.cgi?rs=9559792	A	G	TCCTCAAATGTTTAGTAATCACCAAAGGAATGAGGACTGCTGCCAAGGATACATATACACACACGCACAGATGTATACATACATGCTTCTTAAATTTAAAAGGTGTGAAGAATAGGTGAC[A/G]GAGAAAAAACATGAGAGAGAACAAAATGTATGAACTCTATTAGAAGTTAACTTCTGGCAGTGTAGTAGGAAAAGCGTCTCGGCTAATGTATAAATTACCAAGAAAAAAAAAAGAGTCCCA	TGGGACTCTTTTTTTTTTCTTGGTAATTTATACATTAGCCGAGACGCTTTTCCTACTACACTGCCAGAAGTTAACTTCTAATAGAGTTCATACATTTTGTTCTCTCTCATGTTTTTTCTC[C/T]GTCACCTATTCTTCACACCTTTTAAATTTAAGAAGCATGTATGTATACATCTGTGCGTGTGTGTATATGTATCCTTGGCAGCAGTCCTCATTCCTTTGGTGATTACTAAACATTTGAGGA	C	T	0.0833333	0.00523262	0.916667	0.00523262	0.0051395	0.00183348	0.156388	0.00183348	0.838473	0.00183348	1362	2	0.141107	0.156388	0.152778	0.760403	0.383202	0.4861	7	213	1142	0.905012	13	109857094	31641	7	35	1284	intron	C/T	0.263672	0.249626	YES	2	2	2	1	reference
COL4A2_rs9559799	COL4A2	http://www.ncbi.nlm.nih.gov/entrez/query.fcgi?db=gene&cmd=Retrieve&dopt=full_report&list_uids=1284	rs9559799		http://www.ncbi.nlm.nih.gov/SNP/snp_ref.cgi?rs=9559799	A	G	TTTGGGAAGGGAGCATGGAGATGGCGGAGGGGCGTGGCTTCCACTCAGGCGCCACCGGGTTCTGCCCTCCGTCCCCTCTGTCACTGCCTGTCCTCAGAGCTCCAGCTCTCCCTCGCGGTC[A/G]CTTACCACGTGACATGACACATGCAGTCCTGGATGGGTGACAGCCCGGGAAGGCTGGCGGGTCTCCTAGGACCGTGCCCTGCACTGCGCCTGAGTTGAGCATCGCCAGGCGGTCTGGACA	TTTGGGAAGGGAGCATGGAGATGGCGGAGGGGCGTGGCTTCCACTCAGGCGCCACCGGGTTCTGCCCTCCGTCCCCTCTGTCACTGCCTGTCCTCAGAGCTCCAGCTCTCCCTCGCGGTC[G/A]CTTACCACGTGACATGACACATGCAGTCCTGGATGGGTGACAGCCCGGGAAGGCTGGCGGGTCTCCTAGGACCGTGCCCTGCACTGCGCCTGAGTTGAGCATCGCCAGGCGGTCTGGACA	G	A	0.687225	0.00889454	0.312775	0.00889454	0.472834	0.00582918	0.428781	0.00582918	0.0983847	0.00582918	1362	2	0.337489	0.428781	0.429894	0.00912359	0.923904	0.9492	644	584	134	0.683993	13	109888735	-124385	7	35	1284	intron	A/G			YES	2	2	2	1	reference
COL4A2_rs9583484	COL4A2	http://www.ncbi.nlm.nih.gov/entrez/query.fcgi?db=gene&cmd=Retrieve&dopt=full_report&list_uids=1284	rs9583484		http://www.ncbi.nlm.nih.gov/SNP/snp_ref.cgi?rs=9583484	A	C	AGAAATCAACATTATCACATTGAACTGCAGCCTCCGCTAGAATCTCACCAGTTTTTCCACTAGTGCAGCTTTTCTGTCCCAGGACCCGCCCCAGGATACCAGGCTGCACTTCAAAGGAGC[A/C]GGTTTTACAAAAAAGCATGTTGCTTCAAAAGGCAGCTTCATCCAAGGCAACAGAAGACAGTGAAGCAGAGTACTCAGGAGCCAGCCAGGAGCTCAGGAGACAGGGGAGGGGCTGGAACCC	GGGTTCCAGCCCCTCCCCTGTCTCCTGAGCTCCTGGCTGGCTCCTGAGTACTCTGCTTCACTGTCTTCTGTTGCCTTGGATGAAGCTGCCTTTTGAAGCAACATGCTTTTTTGTAAAACC[G/T]GCTCCTTTGaagtgcagcctggtatcctggggcgggtcctgggacagaaaagctgcactagtggaaaaactggtgagattctagcggaggctgcagttcaatgtgataatgttgatttct	G	T	0.164464	0.00704846	0.835536	0.00704846	0.0249633	0.00362927	0.279001	0.00362927	0.696035	0.00362927	1362	2	0.237065	0.279001	0.274831	0.313595	0.575482	0.6197	34	380	948	0.953042	13	109764350	155271	7	35	1284	intron	G/T	0.291385	0.246551	YES	2	2	2	1	reference
COL4A2_rs9583500	COL4A2	http://www.ncbi.nlm.nih.gov/entrez/query.fcgi?db=gene&cmd=Retrieve&dopt=full_report&list_uids=1284	rs9583500		http://www.ncbi.nlm.nih.gov/SNP/snp_ref.cgi?rs=9583500	A	G	ATGCTTATGAATCACACACAGGTTCCCGCTGGAACCCAGGGGCTGAATGGGGGTCTGATCTCAACTCACCTGGGGGTCCTGGGAACCCTTCACGACCTGCGTCTCCTGGCAAGCCCCTGG[A/G]CCCTGGTCCTCCATCAGCTCCTGCGAAGCCTGGGATTCCTCGGAGGCCTTTGGCACCTAAATAACCAAATAAACCACAAACCACATCAGGCTCCACGAGGATAAATGGGCATGGTCATGC	GCATGACCATGCCCATTTATCCTCGTGGAGCCTGATGTGGTTTGTGGTTTATTTGGTTATTTAGGTGCCAAAGGCCTCCGAGGAATCCCAGGCTTCGCAGGAGCTGATGGAGGACCAGGG[C/T]CCAGGGGCTTGCCAGGAGACGCAGGTCGTGAAGGGTTCCCAGGACCCCCAGGTGAGTTGAGATCAGACCCCCATTCAGCCCCTGGGTTCCAGCGGGAACCTGTGTGTGATTCATAAGCAT	C	T	0.20301	0.00779159	0.79699	0.00779159	0.0447871	0.00448741	0.316446	0.00448741	0.638767	0.00448741	1362	2	0.271238	0.316446	0.323594	0.664541	0.414962	0.3993	61	431	870	0.822705	13	109919621	48082388	7	35	1284	coding-nonsynon	C/T			YES	2	2	2	1	reference
COX4I1_rs2075532	COX4I1	http://www.ncbi.nlm.nih.gov/entrez/query.fcgi?db=gene&cmd=Retrieve&dopt=full_report&list_uids=1327	rs2075532		http://www.ncbi.nlm.nih.gov/SNP/snp_ref.cgi?rs=2075532	C	G	CAGAGAGGACAGCCATTTACAGGCACAAAGGTCAGCAGCTCCCTCCTCTGCAACATTCAACCACTTCTCCCCAAAACCACACTTGTGAAGGAGGAAACACAGAGCTGAAGGATACACCAA[C/G]CCAGGCCACATCATGTTCACGCACGTACGTGCACACACGTGCCCACGCAGGCATGTGACAGGGCAAGGAAAGAAGAAAATGCATACAGTTCGCTTCAGGTGCAAATTAAAACTGCAAAAT	ATTTTGCAGTTTTAATTTGCACCTGAAGCGAACTGTATGCATTTTCTTCTTTCCTTGCCCTGTCACATGCCTGCGTGGGCACGTGTGTGCACGTACGTGCGTGAACATGATGTGGCCTGG[G/C]TTGGTGTATCCTTCAGCTCTGTGTTTCCTCCTTCACAAGTGTGGTTTTGGGGAGAAGTGGTTGAATGTTGCAGAGGAGGGAGCTGCTGACCTTTGTGCCTGTAAATGGCTGTCCTCTCTG	G	C	0.190669	0.00757444	0.809331	0.00757444	0.0382072	0.00424442	0.304923	0.00424442	0.65687	0.00424442	1361	2	0.261003	0.304923	0.308628	0.196176	0.657825	0.6555	52	415	894	0.89147	16	84396712	5252		35	1327	intron	C/G	0.496256	0.0431069	YES	2	2	2	1	reference
COX4I2_rs6058259	COX4I2	http://www.ncbi.nlm.nih.gov/entrez/query.fcgi?db=gene&cmd=Retrieve&dopt=full_report&list_uids=84701	rs6058259		http://www.ncbi.nlm.nih.gov/SNP/snp_ref.cgi?rs=6058259	A	G	AAACCTCCTCTCCTCCTGAAAGTCTCTTCTAGCACTGACTACTTGCAAAGCTCAGCATCTCACTGTCAAGGAGTTCAGTTCATCTCCAGTGTGCAGAGCAGAGTGCATTTGGAGCTGAGC[A/G]GTAATACATTGATAACTGGCCCAGCATCTTTCAGAAAGTCTTGGCTAGGCCAGTGGGAAGTCCCAGAGCAGTAATGCCCGCTAGAGGAGTCCTGTATTGGGCAAAATTAATGCATCCCTA	AAACCTCCTCTCCTCCTGAAAGTCTCTTCTAGCACTGACTACTTGCAAAGCTCAGCATCTCACTGtcaaggagttcagttcatctccagtgtgcagagcagagtgcatttggagctgagc[A/G]gtaatacattgataactggcccaGCATCTTTCAGAAAGTCTTGGCTAGGCCAGTGGGAAGTCCCAGAGCAGTAATGCCCGCTAGAGGAGTCCTGTATTGGGCAAAATTAATGCATCCCTA	A	G	0.714391	0.00863749	0.285609	0.00863749	0.509545	0.00551873	0.409692	0.00551873	0.0807636	0.00551873	1362	2	0.324811	0.409692	0.408073	0.0214197	0.883641	0.948	694	558	110	0.941759	20	29698963			35	84701	locus-region, 3'	A/G	0.452919	0.146027	YES	2	2	2	1	reference
COX4I2_rs6060399	COX4I2	http://www.ncbi.nlm.nih.gov/entrez/query.fcgi?db=gene&cmd=Retrieve&dopt=full_report&list_uids=84701	rs6060399		http://www.ncbi.nlm.nih.gov/SNP/snp_ref.cgi?rs=6060399	A	G	GATGCAAAGACCTGAGCCATGGCCTCAGCATCCCCCCACCAGCCAGGCTCTAGGTATCACACAGGACCCACCTCCGGCCTGCCAGCCCAGAGGGGATACTGTGGAAGAGCTAGGCCTCAC[A/G]CAGGACCCTAAGGTGAAAATAGGAAGAGGAGCTGGACAAAGCGTCACAGACCCAGACCCCCAGCCCTTCAGGAGGCCCGGGAGCCCCTTGAACCCAGGGAGGAGGTCTAGTACAGGAGGA	TCCTCCTGTACTAGACCTCCTCCCTGGGTTCAAGGGGCTCCCGGGCCTCCTGAAGGGCTGGGGGTCTGGGTCTGTGACGCTTTGTCCAGCTCCTCTTCCTATTTTCACCTTAGGGTCCTG[C/T]GTGAGGCCTAGCTCTTCCACAGTATCCCCTCTGGGCTGGCAGGCCGGAGGTGGGTCCTGTGTGATACCTAGAGCCTGGCTGGTGGGGGGATGCTGAGGCCATGGCTCAGGTCTTTGCATC	C	T	0.171072	0.0072364	0.828928	0.0072364	0.0301028	0.00387683	0.281938	0.00387683	0.687959	0.00387683	1362	2	0.243395	0.281938	0.283613	0.0474701	0.827525	0.8528	41	384	937	0.855969	20	29684484	12081		35	84701	locus-region, 5'	C/T	0.339101	0.233583	YES	2	2	2	1	reference
COX4I2_rs6060454	COX4I2	http://www.ncbi.nlm.nih.gov/entrez/query.fcgi?db=gene&cmd=Retrieve&dopt=full_report&list_uids=84701	rs6060454		http://www.ncbi.nlm.nih.gov/SNP/snp_ref.cgi?rs=6060454	A	C	CACCTTTGATTAAGCCACTTGCTCCACCCCGAATGCCTTCCCTTCTTCTTGCCTTTCCTAATCCCACCTAAGCCTTGGCTGTAGCCCCCACTCCTCCAGGAAGCCCTCATTGACTAGATG[A/C]GTTCTGAGCCCTTCTTGCCCCTCACCTGTTAAAATGCCTAATTTTAGGTGCCAAGTAAAGTCTGAAGTGGTGGTGAGAGGCAGAAGAGAATAAATTTTTTTTTGGAGCTTTACTGGGGTT	AACCCCAGTAAAGCTCCAAAAAAAAATTTATTCTCTTCTGCCTCTCACCACCACTTCAGACTTTACTTGGCACCTAAAATTAGGCATTTTAACAGGTGAGGGGCAAGAAGGGCTCAGAAC[T/G]CATCTAGTCAATGAGGGCTTCCTGGAGGAGTGGGGGCTACAGCCAAGGCTTAGGTGGGATTAGGAAAGGCAAGAAGAAGGGAAGGCATTCGGGGTGGAGCAAGTGGCTTAATCAAAGGTG	T	G	0.918502	0.00534283	0.0814978	0.00534283	0.846549	0.00236666	0.143906	0.00236666	0.00954479	0.00236666	1362	2	0.138505	0.143906	0.149712	2.04827	0.152379	0.1515	1153	196	13	0.907213	20	29696565	-4747		35	84701	locus-region	G/T			NO	2	2	2	1	reference
COX4I2_rs6088864	COX4I2	http://www.ncbi.nlm.nih.gov/entrez/query.fcgi?db=gene&cmd=Retrieve&dopt=full_report&list_uids=84701	rs6088864		http://www.ncbi.nlm.nih.gov/SNP/snp_ref.cgi?rs=6088864	A	G	CATGCCTTTGTTCGTTTCTTTATTCACTCACCTGTTTGTGCATAGCCTGATGCTAGGCAATGCTGGGGACATGAGGTGAATCACCTGGATAGTTCCTGCCCCCATGGTGCCCCCGGTCCC[A/G]TGGGGAAAACCAATACAGACTCCAATAATTGTAATACAGAACATGTGGCTAGGGTGAGGTGTGTTCAAGGACTGTGAGATGAAATCTTGGTGGACCTCCCAGAGGAGGGCACATTCCAGC	CATGCCTTTGTTCGTTTCTTTATTCACTCACCTGTTTGTGCATAGCCTGATGCTAGGCAATGCTGGGGACATGAGGTGAATCACCTGGATAGTTCCTGCCCCCATGGTGCCCCCGGTCCC[G/A]TGGGGAAAACCAATACAGACTCCAATAATTGTAATACAGAACATGTGGCTAGGGTGAGGTGTGTTCAAGGACTGTGAGATGAAATCTTGGTGGACCTCCCAGAGGAGGGCACATTCCAGC	G	A	0.206314	0.00784015	0.793686	0.00784015	0.0462555	0.00454001	0.320117	0.00454001	0.633627	0.00454001	1362	2	0.27387	0.320117	0.327497	0.691608	0.405618	0.4022	63	436	863	0.919333	20	29691818	43317100		35	84701	intron	A/G			YES	2	2	2	1	reference
COX5A_rs11072514	COX5A	http://www.ncbi.nlm.nih.gov/entrez/query.fcgi?db=gene&cmd=Retrieve&dopt=full_report&list_uids=9377	rs11072514		http://www.ncbi.nlm.nih.gov/SNP/snp_ref.cgi?rs=11072514	A	T	TACAGGTGTGTGCCCCACTATGCCCACCTGGGACATTTTTACTTAGGAATTAATACTCTGGTTATGTGTAAAAATTCAAACAATATGGAAGTATATAAAGTAGTTTTTACGTCCCATGAT[A/T]ATCACTGTTAATTTAAAATCAGAGGGAACCACTGTTAATAATTTCAAGCGAGTATTATACATTAGGGAGAAAAGTATAAACATGCCTATGTAATACTTTTTGTTCTACTTGATTTTATTT	AAATAAAATCAAGTAGAACAAAAAGTATTACATAGGCATGTTTATACTTTTCTCCCTAATGTATAATACTCGCTTGAAATTATTAACAGTGGTTCCCTCTGATTTTAAATTAACAGTGAT[T/A]ATCATGGGACGTAAAAACTACTTTATATACTTCCATATTGTTTGAATTTTTACACATAACCAGAGTATTAATTCCTAAGTAAAAATGTCCCAGGTgggcatagtggggcacacacctgta	T	A	0.455947	0.00948407	0.544053	0.00948407	0.204846	0.00671972	0.502203	0.00671972	0.292952	0.00671972	1362	2	0.373052	0.502203	0.496119	0.204822	0.650856	0.6633	279	684	399	0.934505	15	73008918	3550		35	9377	intron	A/T	0.337904	0.234036	YES	2	2	2	1	reference
COX5A_rs8042694	COX5A	http://www.ncbi.nlm.nih.gov/entrez/query.fcgi?db=gene&cmd=Retrieve&dopt=full_report&list_uids=9377	rs8042694		http://www.ncbi.nlm.nih.gov/SNP/snp_ref.cgi?rs=8042694	A	G	CCAAAGTGCTGGGATAACAGGCATGAGCCACGGTGCCCAGCCTTAATTTCTACAACAAGAAAAAAATGGATCTCTACACCTAAATATGTCTGGTAAGTATGAACATTTAATCAAAACTAC[A/G]TGGATATTTAATAAGTCTTACAAGACTAATATTCAAATTTAATATATCAGAAAACAAGGCCAGGTGCGGTGGCTCACACCTGTAATCCCAGCACTTTGGGAGGCTGAGGCAGGCAGATCA	ccaaagtgctgggataacaggcatgagccacggtgcccagccTTAATTTCTACAACAAGAAAAAAATGGATCTCTACACCTAAATATGTCTGGTAAGTATGAACATTTAATCAAAACTAC[G/A]TGGATATTTAATAAGTCTTACAAGACTAATATTCAAATTTAATATATCAGAAAACAAggccaggtgcggtggctcacacctgtaatcccagcactttgggaggctgaggcaggcagatca	G	A	0.711821	0.00870717	0.288179	0.00870717	0.508076	0.00557463	0.407489	0.00557463	0.0844347	0.00557463	1362	2	0.326106	0.407489	0.410264	0.0623067	0.802887	0.7968	692	555	115	0.961474	15	73012468			35	9377	intron	A/G	0.432288	0.171088	YES	2	2	2	1	reference
COX5B_rs1800648	COX5B	http://www.ncbi.nlm.nih.gov/entrez/query.fcgi?db=gene&cmd=Retrieve&dopt=full_report&list_uids=1329	rs1800648		http://www.ncbi.nlm.nih.gov/SNP/snp_ref.cgi?rs=1800648	A	G	TGGGCAACGGGAAGCCATGGACGGA[A/G]TATGTTTTCCGTTTCAAACAAGGTA	TACCTTGTTTGAAACGGAAAACATA[T/C]TCCGTCCATGGCTTCCCGTTGCCCA	T	C	0.99486	0.00136651	0.0051395	0.00136651	0.989721	1.40464e-05	0.010279	1.40464e-05			1362	2	0.0101739	0.010279	0.0102262	0.0363492	0.848796	1	1348	14	0	0.890544	2	97628226	-158		35	1329	locus-region	C/T	0.00477326	0.0486195	NO	2	2	2	1	reference
COX5B_rs2071038	COX5B	http://www.ncbi.nlm.nih.gov/entrez/query.fcgi?db=gene&cmd=Retrieve&dopt=full_report&list_uids=1329	rs2071038		http://www.ncbi.nlm.nih.gov/SNP/snp_ref.cgi?rs=2071038	A	G	ATTTACTAAAATTACTGGATCCTACTATATACCAGACCTCTGCAAGGCATTGAAGATTCA[A/G]TGATGAGCATTAATTCCCACTCTAAGGGGATTTTTCTATCTGGTAGGGAAACTCAGATAC	ATTTACTAAAATTACTGGATCCTACTATATACCAGACCTCTGCAAGGCATTGAAGATTCA[A/G]TGATGAGCATTAATTCCCACTCTAAGGGGATTTTTCTATCTGGTAGGGAAACTCAGATAC	A	G	0.998164	0.000819369	0.00183554	0.000819369	0.996329	3.00796e-06	0.00367107	3.00796e-06			1362	2	0.00365762	0.00367107	0.00366433	0.00460573	0.945893	1	1357	5	0	0.777487	2	97720154	21618356		35	1329	locus-region	A/G	0.116664	0.211475	YES	2	2	2	1	reference
COX6A1_rs2076022	COX6A1	http://www.ncbi.nlm.nih.gov/entrez/query.fcgi?db=gene&cmd=Retrieve&dopt=full_report&list_uids=1337	rs2076022		http://www.ncbi.nlm.nih.gov/SNP/snp_ref.cgi?rs=2076022	A	G	AGCGCCGGAAGCGGAAGTGGAAAATTGGCTCTGGGGGCGGTACTACAACCTCCAAAGGAAGTTACTATTGGGCGCCGCCCTCCCACTGGCATTAACCTGAGCACTATCATCCGGGACGAC[A/G]GAGTCCTTGTCAAAATCCTCGGCATCTCGGGCAAGAGAGAGCATGCGCTCTGCACCTCCCTTCAGGCTTTACCGTTTCCTTCGTGCGCATGCGTGTGCCCTCCGGTCTCCCTACCGTCCC	GGGACGGTAGGGAGACCGGAGGGCACACGCATGCGCACGAAGGAAACGGTAAAGCCTGAAGGGAGGTGCAGAGCGCATGCTCTCTCTTGCCCGAGATGCCGAGGATTTTGACAAGGACTC[C/T]GTCGTCCCGGATGATAGTGCTCAGGTTAATGCCAGTGGGAGGGCGGCGCCCAATAGTAACTTCCTTTGGAGGTTGTAGTACCGCCCCCAGAGCCAATTTTCCACTTCCGCTTCCGGCGCT	C	T	0.401476	0.00982124	0.598524	0.00982124	0.182288	0.00654898	0.438376	0.00654898	0.379336	0.00654898	1355	2	0.365105	0.438376	0.480586	10.4525	0.00122483	0.0017	247	594	514	0.820743	12	119338510	-2064		35	1337	locus-region	C/T	0.494829	0.0505838	YES	2	2	2	1	reference
COX6A1_rs3901251	COX6A1	http://www.ncbi.nlm.nih.gov/entrez/query.fcgi?db=gene&cmd=Retrieve&dopt=full_report&list_uids=1337	rs3901251		http://www.ncbi.nlm.nih.gov/SNP/snp_ref.cgi?rs=3901251	A	G	AACGGATCCTCTGGCCTCAGCCTCTCAAGTAGCTAGGACTACAAGCAAGCCCGGCTAGCTTAGACCCTTTGTATGGCCCCAGTGTGGGGCCTCATATACCCTTTGGCTGTGTTTGAGGAC[A/G]TGTTTGACAGATTTGATGATCTTGATTGCACCCTGAAGTATAAAAACTTAGGCTACTCGAGAAAGATTTCATGCTAAATCAGGTAGTAAAGCTCTAGTAATATGATCCTAAGGTTTTGTC	aacggatcctctggcctcagcctctcaagtagctaggactacaagcAAGCCCGGCTAGCTTAGACCCTTTGTATGGCCCCAGTGTGGGGCCTCATATACCCTTTGGCTGTGTTTGAGGAC[G/A]TGTTTGACAGATTTGATGATCTTGATTGCACCCTGAAGTATAAAAACTTAGGCTACTCGAGAAAGATTTCATGCTAAATCAGGTAGTAAAGCTCTAGTAATATGATCCTAAGGTTTTGTC	G	A	0.051395	0.00424337	0.948605	0.00424337	0.00293686	0.00138553	0.0969163	0.00138553	0.900147	0.00138553	1362	2	0.0927533	0.0969163	0.0975071	0.0500054	0.823054	0.7724	4	132	1226	0.944417	12	119336446	4804		35	1337	.	A/G	0.0487499	0.148319	YES	1	1	1	1	reference
COX6A1_rs968474	COX6A1	http://www.ncbi.nlm.nih.gov/entrez/query.fcgi?db=gene&cmd=Retrieve&dopt=full_report&list_uids=1337	rs968474	rs8903	http://www.ncbi.nlm.nih.gov/SNP/snp_ref.cgi?rs8903	A	G	GAAACAGAAATAACTAATGCCAATTTCTTTTCAACTTGGACACTGACTTGAAGCTCAAATGCTAATTTCTGCGAAAAAACACAACCAAAGAAAGTAACTCTCAGCTCATGACCAATCTAA[A/G]TTTAAGTTATTTATTTAAGCCATCTCCTGCCACAAGCAAAGGGATGGGAGACCAGTATACCAGTCATCATTTGATACAAGTAAAGAAGGTGAGCTTAAGGTCCCATATACTTTTTCTGGT	ACCAGAAAAAGTATATGGGACCTTAAGCTCACCTTCTTTACTTGTATCAAATGATGACTGGTATACTGGTCTCCCATCCCTTTGCTTGTGGCAGGAGATGGCTTAAATAAATAACTTAAA[C/T]TTAGATTGGTCATGAGCTGAGAGTTACTTTCTTTGGTTGTGTTTTTTCGCAGAAATTAGCATTTGAGCTTCAAGTCAGTGTCCAAGTTGAAAAGAAATTGGCATTAGTTATTTCTGTTTC	C	T	0.353524	0.00918584	0.646476	0.00918584	0.126285	0.00619928	0.454479	0.00619928	0.419236	0.00619928	1362	2	0.352624	0.454479	0.45709	0.0444411	0.833035	0.8537	172	619	571	0.896512	12	119341250			35	1337	mrna-utr	C/T	0.424884	0.178649	YES	2	2	2	1	reference
COX6A2_rs4889657	COX6A2	http://www.ncbi.nlm.nih.gov/entrez/query.fcgi?db=gene&cmd=Retrieve&dopt=full_report&list_uids=1339	rs4889657		http://www.ncbi.nlm.nih.gov/SNP/snp_ref.cgi?rs=4889657	A	G	CAGCCTGGGCAAGACAGCAAGACTCCATGTAAAAAAAAAAAAGAAGAAGAAGAAAAAGAAAAGAGAAAGAAAAGAAAGAAAAGCTGGGTAAGAGGGCAGGGAAGAAAATTGGGAATAAGA[A/G]GAAGCTGAGAGAGAAGAGGAGGCAACAACTAAGCTAACTTACGTTTGTGTGCGAGAACATTTATGTGAACAGCTATCATATATCGAGCATCTGCTGGCCCCGAGCACAGTAGGTACACAC	GTGTGTACCTACTGTGCTCGGGGCCAGCAGATGCTCGATATATGATAGCTGTTCACATAAATGTTCTCGCACACAAACGTAAGTTAGCTTAGTTGTTGCCTCCTCTTCTCTCTCAGCTTC[C/T]TCTTATTCCCAATTTTCTTCCCTGCCCTCTTACCCAGCTTTTCTTTCTTTTCTTTCTCTtttctttttcttcttcttcttttttttttttacatggagtcttgctgtcttgcccaggctg	C	T	0.942731	0.00452797	0.0572687	0.00452797	0.890602	0.00179113	0.104258	0.00179113	0.0051395	0.00179113	1362	2	0.102148	0.104258	0.107978	1.6162	0.203622	0.2051	1213	142	7	0.966304	16	31344433	5055		35	1339	locus-region, 5'	C/T	0.169193	0.23658	YES	2	2	2	1	reference
COX6A2_rs8055941	COX6A2	http://www.ncbi.nlm.nih.gov/entrez/query.fcgi?db=gene&cmd=Retrieve&dopt=full_report&list_uids=1339	rs8055941		http://www.ncbi.nlm.nih.gov/SNP/snp_ref.cgi?rs=8055941	A	G	TGTGAGTGAGAACTTACAGAAACAATGGTGAGTGCACAGCCTGGAAGAGACAGCTCTGCACACCCTCTAGAGAGGCAGGTAAGATGGTGACAAGCCCAGAAAAGCACAGACCACCTGAGC[A/G]GAGGTCTCTGGGTACCTGGGCAAGTGCACCTCGTGATGGTGACAGCAGCCCAGGACAGAAGTGGCCCTCCTCAGGGCGTTCTTGACATCCCAGCAAGAAAACCTCTCCACAGGAGCTCCC	GGGAGCTCCTGTGGAGAGGTTTTCTTGCTGGGATGTCAAGAACGCCCTGAGGAGGGCCACTTCTGTCCTGGGCTGCTGTCACCATCACGAGGTGCACTTGCCCAGGTACCCAGAGACCTC[C/T]GCTCAGGTGGTCTGTGCTTTTCTGGGCTTGTCACCATCTTACCTGCCTCTCTAGAGGGTGTGCAGAGCTGTCTCTTCCAGGCTGTGCACTCACCATTGTTTCTGTAAGTTCTCACTCACA	C	T	0.0209251	0.00276221	0.979075	0.00276221	0.000734214	0.000712644	0.0403818	0.000712644	0.958884	0.000712644	1362	2	0.040135	0.0403818	0.0409745	0.284991	0.593448	0.4578	1	55	1306	0.749982	16	31349488			35	1339	.	C/T	0.120842	0.214052	YES	2	2	2	1	reference
COX6B1_rs3761093	COX6B1	http://www.ncbi.nlm.nih.gov/entrez/query.fcgi?db=gene&cmd=Retrieve&dopt=full_report&list_uids=1340	rs3761093		http://www.ncbi.nlm.nih.gov/SNP/snp_ref.cgi?rs=3761093	A	G	ACAGTGTAGGTCTGAGTCCTGTGTCCTCCAGCTTGGAGTGGGGAAAGAGTGAGTGGTGTT[A/G]GGGTGCAAGCACTAGTTTTAATTCTTTGATGATCCCTTGCACTGGGAGGACACACAGCAC	ACAGTGTAGGTCTGAGTCCTGTGTCCTCCAGCTTGGAGTGGGGAAAGAGTGAGTGGTGTT[G/A]GGGTGCAAGCACTAGTTTTAATTCTTTGATGATCCCTTGCACTGGGAGGACACACAGCAC	G	A	0.311307	0.0088869	0.688693	0.0088869	0.0976505	0.00581594	0.427313	0.00581594	0.475037	0.00581594	1362	2	0.336859	0.427313	0.42879	0.0161615	0.898839	0.9004	133	582	647	0.892911	19	40828289	10866		35	1340	.	A/G	0.368888	0.219922	YES	2	2	2	1	reference
COX6B1_rs7254601	COX6B1	http://www.ncbi.nlm.nih.gov/entrez/query.fcgi?db=gene&cmd=Retrieve&dopt=full_report&list_uids=1340	rs7254601		http://www.ncbi.nlm.nih.gov/SNP/snp_ref.cgi?rs=7254601	A	G	AGACTATGGTGATCTACATGCTAGCACACAGAAAGAATGCTAAGACACAGGAAAAGTAAGTTGCAGAACAATCTATATAGTAGGAGTCAATTTGCAAGGATGGAGTTTTTATGGTGTGGT[A/G]TGTGTATGTAAATAAAGTAGGCACATACCGCTGGCACTTATTATGGGCCAGCTATGTTGTTAGACCTTTTTTTTTTTTTTTTTTTGAGATGGAGTCTTGCTCTGTCTCCCAGGCTGGAGT	AGACTATGGTGATCTACATGCTAGCACACAGAAAGAATGCTAAGACACAGGAAAAGTAAGTTGCAGAACAATCTATATAGTAGGAGTCAATTTGCAAGGATGGAGTTTTTATGGTGTGGT[A/G]TGTGTATGTAAATAAAGTAGGCACATACCGCTGGCACTTATTATGGGCCAGCTATGTTGTTAGACCTTTTTTTTTTTTTTTTTTTGAGATGGAGTCTTGCTCTGTCTCCCAGGCTGGAGT	A	G	0.750367	0.00832694	0.249633	0.00832694	0.564611	0.00510363	0.371512	0.00510363	0.0638767	0.00510363	1362	2	0.304458	0.371512	0.374633	0.0944745	0.758564	0.7718	769	506	87	0.899721	19	40839155			35	1340	intron	A/G	0.444444	0.157135	YES	2	2	2	1	reference
COX7A1_rs7255180	COX7A1	http://www.ncbi.nlm.nih.gov/entrez/query.fcgi?db=gene&cmd=Retrieve&dopt=full_report&list_uids=1346	rs7255180		http://www.ncbi.nlm.nih.gov/SNP/snp_ref.cgi?rs=7255180	A	G	GGAGACTGGTTTTTGGCATAATAACATTACACAAATACATGGGATGACAATCATAGCAGCTGGCACTTCACTGAGTATTTACTGTGTGCCAAGCATGGGGTAAAGTGCTTTCCAGGTATT[A/G]GCTGATTTAATCCAACTCTGTGAGATAAGTGTCATTTTAAAATGAGGCACAGGCTGGGCGTGGTGGCTCACACCTATAATCCCAACACTTTGGAAGGCCAAGATGGGAGGATCACTTGAG	ctcaagtgatcctcccatcttggccttccaaagtgttgggattataggtgtgagccaccacgcccagccTGTGCCTCATTTTAAAATGACACTTATCTCACAGAGTTGGATTAAATCAGC[C/T]AATACCTGGAAAGCACTTTACCCCATGCTTGGCACACAGTAAATACTCAGTGAAGTGCCAGCTGCTATGATTGTCATCCCATGTATTTGTGTAATGTTATTATGCCAAAAACCAGTCTCC	C	T	0.0591043	0.00449565	0.940896	0.00449565	0.00293686	0.00139739	0.112335	0.00139739	0.884728	0.00139739	1362	2	0.105037	0.112335	0.111222	0.13637	0.711917	1	4	153	1205	0.888607	19	41332159	3376		35	1346	intron	C/T	0.0568906	0.158773	YES	2	2	2	1	reference
COX7A1_rs753420	COX7A1	http://www.ncbi.nlm.nih.gov/entrez/query.fcgi?db=gene&cmd=Retrieve&dopt=full_report&list_uids=1346	rs753420		http://www.ncbi.nlm.nih.gov/SNP/snp_ref.cgi?rs=753420	A	C	ATGTCTCAACAAATCTCTGAGAAAGATCCTGCCTTAGCCCTCACGTTACAGATACGGAAACAGGCTCGGAGGTGCAATCTCTGGCTGTGTAGACAGAACAGGGAGTTGGAACACGGCCTT[A/C]TGCGTTTCCTCACTCTCACATACCAGCGGGCAGGGAGAGATCCGGGGAGGAGTTGCACTTGCCCCCGGCGGAAATCTCCAAAAATCTGCAAAAATGTATTCCCTGGTACCGCTTTGGGCT	AGCCCAAAGCGGTACCAGGGAATACATTTTTGCAGATTTTTGGAGATTTCCGCCGGGGGCAAGTGCAACTCCTCCCCGGATCTCTCCCTGCCCGCTGGTATGTGAGAGTGAGGAAACGCA[G/T]AAGGCCGTGTTCCAACTCCCTGTTCTGTCTACACAGCCAGAGATTGCACCTCCGAGCCTGTTTCCGTATCTGTAACGTGAGGGCTAAGGCAGGATCTTTCTCAGAGATTTGTTGAGACAT	G	T	0.723935	0.00872448	0.276065	0.00872448	0.531571	0.00551245	0.384728	0.00551245	0.0837004	0.00551245	1362	2	0.319823	0.384728	0.399706	1.91239	0.166698	0.1698	724	524	114	0.900027	19	41335535			35	1346	mrna-utr	G/T	0.48433	0.0871186	YES	1	1	1	1	reference
COX7A2L_rs10206058	COX7A2L	http://www.ncbi.nlm.nih.gov/entrez/query.fcgi?db=gene&cmd=Retrieve&dopt=full_report&list_uids=9167	rs10206058		http://www.ncbi.nlm.nih.gov/SNP/snp_ref.cgi?rs=10206058	A	G	TGGCACATCTTGTTCACTGCTCCTATATTCCAAGACTTAGAAAAGCAACCGGCAGAGTAAGCGCATTCAGTAAATATAGGCAGAATGTTCAAATAAACTAAAGAAGGCTATAGCTTCACA[A/G]TGTAGGTTTGAGTATCTCAGAAACAAAGTCTGATCAACTGGCATTTGATGGCAGGGCATCCACAATTCCCATAGCAATAAGAAAACAACTGAAAGCTGTTCTTATAAAAAGTGGACAGGC	tggcacatcttgttcactgctcctatattccaagacttagaaaagcaaccggcagagtaagcgcattcagtaaatataggcagaatgTTCAAATAAACTAAAGAAGGCTATAGCTTCACA[G/A]TGTAGGTTTGAGTATCTCAGAAACAAAGTCTGATCAACTGGCATTTGATGGCAGGGCATCCACAATTCCCATAGCAATAAGAAAACAACTGAAAGCTGTTCTTATAAAAAGTGGACAggc	G	A	0.635095	0.0091892	0.364905	0.0091892	0.401615	0.006272	0.46696	0.006272	0.131424	0.006272	1362	2	0.356083	0.46696	0.463498	0.0759824	0.782818	0.8215	547	636	179	0.954581	2	42495318	-10992		35	9167	intron	A/G	0.419425	0.183834	YES	2	2	2	1	reference
COX7A2L_rs2041354	COX7A2L	http://www.ncbi.nlm.nih.gov/entrez/query.fcgi?db=gene&cmd=Retrieve&dopt=full_report&list_uids=9167	rs2041354		http://www.ncbi.nlm.nih.gov/SNP/snp_ref.cgi?rs=2041354	A	T	AAGGGGGTCCTGTATGATGGTCTTTCACTCTGAAAGGAAGGCAGACCCTCAGCCATTCTTGTCCCACCAAGGGGTGTTGCCCTGGAGAGTGAAAACCATCCCTGGGGCAATGTAGGAATA[A/T]GTGCAAATATTGGTAACATTGAGGAAGTGTGTGTCTCTAATGACTGACAGTTTTTTTTTTTGCAATTTAGAGGTTTTTAACAAAATTGAAGGAGGAGCCAGCTAAGTTGTCACTTGATCA	AAGGGGGTCCTGTATGATGGTCTTTCACTCTGAAAGGAAGGCAGACCCTCAGCCATTCTTGTCCCACCAAGGGGTGTTGCCCTGGAGAGTGAAAACCATCCCTGGGGCAATGTAGGAATA[A/T]GTGCAAATATTGGTAACattgaggaagtgtgtgtctctaatgactgacagtttttttttttgcaatttagaggtttttaacaaaattgaaggaggagccagctaagttgtcacttgatca	A	T	0.567915	0.00940161	0.432085	0.00940161	0.317915	0.00664324	0.5	0.00664324	0.182085	0.00664324	1362	2	0.370345	0.5	0.490775	0.481205	0.487877	0.5099	433	681	248	0.876166	2	42484326	7396		35	9167	.	A/T	0.433884	0.169371	YES	2	2	2	1	reference
COX7A2L_rs3764907	COX7A2L	http://www.ncbi.nlm.nih.gov/entrez/query.fcgi?db=gene&cmd=Retrieve&dopt=full_report&list_uids=9167	rs3764907		http://www.ncbi.nlm.nih.gov/SNP/snp_ref.cgi?rs=3764907	A	G	AAAGAGGGGAGGGTGGTTAATTTCCTCATTAGTATTTAAGGGTGTGAGGGTTTTGAAATGGCATGAATAGCTCTTGATCATTTATTGCATGGAAGAAGCA[A/G]TAGCCTCAATAACTGAGTAGCCTGTATAACTGAATGACCCAATATATATATTTGACTTCGTGACACATGTAATGACTTGGCAGTGGGTTTTTTTCTCATT	AAAGAGGGGAGGGTGGTTAATTTCCTCATTAGTATTTAAGGGTGTGAGGGTTTTGAAATGGCATGAATAGCTCTTGATCATTTATTGCATGGAAGAAGCA[G/A]TAGCCTCAATAACTGAGTAGCCTGTATAACTGAATGACCCAATATATATATTTGACTTCGTGACACATGTAATGACTTGGCAGTGGGTTTTTTTCTCATT	G	A	0.679148	0.00878876	0.320852	0.00878876	0.453744	0.00584078	0.450808	0.00584078	0.0954479	0.00584078	1362	2	0.340846	0.450808	0.435812	1.61258	0.204129	0.2127	618	614	130	0.923975	2	42491722	8785		35	9167	intron	A/G	0.448342	0.152186	YES	2	2	2	1	reference
COX7A2L_rs3806584	COX7A2L	http://www.ncbi.nlm.nih.gov/entrez/query.fcgi?db=gene&cmd=Retrieve&dopt=full_report&list_uids=9167	rs3806584		http://www.ncbi.nlm.nih.gov/SNP/snp_ref.cgi?rs=3806584	A	T	GGTGGGCGTGGTCTGGGTAGGGGCGGGGCTACATCGAAGCCGGTTGGGAATTCCACCATCCGAGAGAGTCTGTGCTGCGGAGCCACCGTCTGGTCGTCGGGTTGAAGGCGTCTCTTGCTT[A/T]ACCGAACTTTAACTGATCGTAGTCTCATTTATTTCCTTCCGACCTAGAGCACCTCTTATCCAGAAGCCACCACCTGCTGTTGCTCAGTCTGCCCAGGAGTATAGACTTGTCGGCCAAGCT	AGCTTGGCCGACAAGTCTATACTCCTGGGCAGACTGAGCAACAGCAGGTGGTGGCTTCTGGATAAGAGGTGCTCTAGGTCGGAAGGAAATAAATGAGACTACGATCAGTTAAAGTTCGGT[T/A]AAGCAAGAGACGCCTTCAACCCGACGACCAGACGGTGGCTCCGCAGCACAGACTCTCTCGGATGGTGGAATTCCCAACCGGCTTCGATGTAGCCCCGCCCCTACCCAGACCACGCCCACC	T	A	0.159325	0.00698186	0.840675	0.00698186	0.0242291	0.0035745	0.270191	0.0035745	0.70558	0.0035745	1362	2	0.232	0.270191	0.26788	0.101319	0.750252	0.8334	33	368	961	0.897842	2	42500507			35	9167	locus-region	A/T	0.194126	0.243676	YES	2	2	2	1	reference
COX7A2_rs240423	COX7A2	http://www.ncbi.nlm.nih.gov/entrez/query.fcgi?db=gene&cmd=Retrieve&dopt=full_report&list_uids=1347	rs240423		http://www.ncbi.nlm.nih.gov/SNP/snp_ref.cgi?rs=240423	A	G	TATGGACAATGTACTTAAAAAACCCCCACGCCCTAGCTATTGGCACGTGGTAATTTTGCCCAGAGTTTTGGTTATATGCATAATCCAGAGGGGTGTAGAAAACCAGGTCCTTTCAGTACC[A/G]ATCTAAGGAAGACATGAATTGGGGTGTTTATAAACCTTGGTGAGGAAGAGAATTTTAACTGGGACTGGTAACTTGGTGGGCCCATTGACATACAGTAGATTGTGAAGAAGAAAACCCCAA	TTGGGGTTTTCTTCTTCACAATCTACTGTATGTCAATGGGCCCACCAAGTTACCAGTCCCAGTTAAAATTCTCTTCCTCACCAAGGTTTATAAACACCCCAATTCATGTCTTCCTTAGAT[T/C]GGTACTGAAAGGACCTGGTTTTCTACACCCCTCTGGATTATGCATATAACCAAAACTCTGGGCAAAATTACCACGTGCCAATAGCTAGGGCGTGGGGGTTTTTTAAGTACATTGTCCATA	T	C	0.0569016	0.00445639	0.943098	0.00445639	0.00367107	0.00153756	0.106461	0.00153756	0.889868	0.00153756	1362	2	0.101568	0.106461	0.107328	0.0887866	0.765725	0.8017	5	145	1212	0.89233	6	76011322			35	1347	locus-region	C/T	0.211932	0.247085	YES	2	2	2	1	reference
COX7A2_rs409536	COX7A2	http://www.ncbi.nlm.nih.gov/entrez/query.fcgi?db=gene&cmd=Retrieve&dopt=full_report&list_uids=1347	rs409536		http://www.ncbi.nlm.nih.gov/SNP/snp_ref.cgi?rs=409536	A	C	CACGATCTGATAACTATAATATTGATTTAGCAAGAATCCCAAATATAAATTAATGTAGACAATCTATCTCAGGCAGTTATTGTTACTATCATTAGTAAGAACTGGAAGCTGAGAACATAC[A/C]GAGATCAAATACACAATAATTACATTTGAACTAGAACTCAAACCTAGATATGTCTTATTCTGAAGCCCTTTGTTTATGTGTTATGTACCATGTTATTCCTAAATGCAGAAAAAAGCCAAA	CACGATCTGATAACTATAATATTGATTTAGCAAGAATCCCAAATATAAATTAATGTAGACAATCTATCTCAGGCAGTTATTGTTACTATCATTAGTAAGAACTGGAAGCTGAGAACATAC[C/A]GAGATCAAATACACAATAATTACATTTGAACTAGAACTCAAACCTAGATATGTCTTATTCTGAAGCCCTTTGTTTATGTGTTATGTACCATGTTATTCCTAAATGCAGAAAAAAGCCAAA	C	A	0.0741557	0.00506077	0.925844	0.00506077	0.00660793	0.0020126	0.135095	0.0020126	0.858297	0.0020126	1362	2	0.127886	0.135095	0.137313	0.355282	0.551138	0.5478	9	184	1169	0.868942	6	76001698	-33506380		35	1347	locus-region, 3'	A/C	0.301783	0.244578	YES	2	2	2	1	reference
COX8A_rs11231664	COX8A	http://www.ncbi.nlm.nih.gov/entrez/query.fcgi?db=gene&cmd=Retrieve&dopt=full_report&list_uids=1351	rs11231664		http://www.ncbi.nlm.nih.gov/SNP/snp_ref.cgi?rs=11231664	A	C	TCTCAAAATAAATAAGTAAAATAAAATAAAATAAAATAAATAGCAGTAACAACCATTTTCGTCGCTGACAGCGTCAGGCATCCCCCAGTGAACCAACGAGAAAATGGGCTCAGAGCGGCT[A/C]AAGAAGTCGGCAGGAGGCGGCGCAGCGAGGAGGCGACAGGAGAGGGAGGGCCTGACAGGACCAGACCCGAGATCCTGGGGCTGTGGGGAAAGACCTAACGCCGACAGCCCCGACTGTCGC	GCGACAGTCGGGGCTGTCGGCGTTAGGTCTTTCCCCACAGCCCCAGGATCTCGGGTCTGGTCCTGTCAGGCCCTCCCTCTCCTGTCGCCTCCTCGCTGCGCCGCCTCCTGCCGACTTCTT[T/G]AGCCGCTCTGAGCCCATTTTCTCGTTGGTTCACTGGGGGATGCCTGACGCTGTCAGCGACGAAAATGGTTGTTACTGCTAtttattttattttattttattttacttAtttattttgaga	T	G	0.587932	0.00953019	0.412068	0.00953019	0.350258	0.0065786	0.47535	0.0065786	0.174393	0.0065786	1359	2	0.367148	0.47535	0.484536	0.488482	0.484605	0.5027	476	646	237	0.895432	11	63499129			35	1351	intron	G/T	0.245629	0.249962	YES	2	2	2	1	reference
COX8A_rs480211	COX8A	http://www.ncbi.nlm.nih.gov/entrez/query.fcgi?db=gene&cmd=Retrieve&dopt=full_report&list_uids=1351	rs480211		http://www.ncbi.nlm.nih.gov/SNP/snp_ref.cgi?rs=480211	A	G	TGCCTTTTTCACCATGCTAACTCCTGCTTCCTGGCTTCCAGTTAATGATACCACTTACTTTATTCAGTGAATATTTATTAGCCTCTACTGTGTGTTAGGAACTATTGTAGACACCAGTAT[A/G]AACGAGGTGGATAGAGTTTCTTGTCACAAAGCTGACTTCTGGAGGGAAAAAACAGACAATAAACAGGCACTTAATTAGAAACTATTGTGTAAGTGTCACGGTGAAAATAAAACCATGATG	CATCATGGTTTTATTTTCACCGTGACACTTACACAATAGTTTCTAATTAAGTGCCTGTTTATTGTCTGTTTTTTCCCTCCAGAAGTCAGCTTTGTGACAAGAAACTCTATCCACCTCGTT[C/T]ATACTGGTGTCTACAATAGTTCCTAACACACAGTAGAGGCTAATAAATATTCACTGAATAAAGTAAGTGGTATCATTAACTGGAAGCCAGGAAGCAGGAGTTAGCATGGTGAAAAAGGCA	C	T	0.514317	0.00955807	0.485683	0.00955807	0.263583	0.00676845	0.501468	0.00676845	0.234949	0.00676845	1362	2	0.374795	0.501468	0.49959	0.019254	0.889641	0.9136	359	683	320	0.895749	11	63496015	93000149		35	1351	.	C/T	0.499974	0.00360976	YES	2	2	2	1	reference
CPSF4_rs13243267	CPSF4	http://www.ncbi.nlm.nih.gov/entrez/query.fcgi?db=gene&cmd=Retrieve&dopt=full_report&list_uids=10898	rs13243267		http://www.ncbi.nlm.nih.gov/SNP/snp_ref.cgi?rs=13243267	C	G	GGGTGCCAACTGGGCAGAGCCCCTCAGGGCAGCAGGGACTCAGGGGTGGGTGTCAGTACAGAGTCAGTGCCCCCAGCTGCCTCCTGACCCTTTTGTTCAGTGCTTGAGGCTGCCGTTTTA[C/G]GAGTCATAGAGTAAAGAGAAGCTATGGAAGGGCCTGGATAATCAGGACTGGGATGAGGCAGGGTCAGGGCTGGATTTGTCATGTGGCTCTGCAGGCTCCCCTTACCCAAGTCTAAGCATC	GGGTGCCAACTGGGCAGAGCCCCTCAGGGCAGCAGGGACTCAGGGGTGGGTGTCAGTACAGAGTCAGTGCCCCCAGCTGCCTCCTGACCCTTTTGTTCAGTGCTTGAGGCTGCCGTTTTA[G/C]GAGTCATAGAGTAAAGAGAAGCTATGGAAGGGCCTGGATAATCAGGACTGGGATGAGGCAGGGTCAGGGCTGGATTTGTCATGTGGCTCTGCAGGCTCCCCTTACCCAAGTCTAAGCATC	G	C	0.0914097	0.00556113	0.90859	0.00556113	0.00954479	0.00237624	0.16373	0.00237624	0.826725	0.00237624	1362	2	0.152312	0.16373	0.166108	0.279165	0.597249	0.6256	13	223	1126	0.90471	7	98697965	-886	6	35	10898	intron	C/G	0.177743	0.23933	YES	3	3	3	1	reference
CPSF4_rs3779354	CPSF4	http://www.ncbi.nlm.nih.gov/entrez/query.fcgi?db=gene&cmd=Retrieve&dopt=full_report&list_uids=10898	rs3779354		http://www.ncbi.nlm.nih.gov/SNP/snp_ref.cgi?rs=3779354	A	G	GCTGTAGGAATTGTGTGCGCCTTGGGTTGAGAACATACTCTTCAAAGAGTACTGGGGGTT[A/G]CTCCTGCCACGTGCCAGGGACACACCAATCCTGGGGCGATTTTAGATTAGAAAACTTAGT	GCTGTAGGAATTGTGTGCGCCTTGGGTTGAGAACATACTCTTCAAAGAGTACTGGGGGTT[A/G]CTCCTGCCACGTGCCAGGGACACACCAATCCTGGGGCGATTTTAGATTAGAAAACTTAGT	A	G	0.941263	0.00451414	0.0587372	0.00451414	0.886197	0.00153967	0.110132	0.00153967	0.00367107	0.00153967	1362	2	0.104461	0.110132	0.110574	0.0217665	0.88271	0.8039	1207	150	5	0.94669	7	98697079	10951445	6	35	10898	intron	A/G			NO	3	3	3	1	reference
CRP_rs1130864	CRP	http://www.ncbi.nlm.nih.gov/entrez/query.fcgi?db=gene&cmd=Retrieve&dopt=full_report&list_uids=1401	rs1130864		http://www.ncbi.nlm.nih.gov/SNP/snp_ref.cgi?rs=1130864	A	G	ATTTCTCCTTTCTGGGTGTTAGTTTTCTCATCTATGTGAGGTAAGAAATTATCTCCAAGATCTGTCCAACTTGAAATAAAAATGAAAACAAAACACCTCAAATTCTGATTCTTTTGGACC[A/G]TTTCCCAGCATAGTTAACGAGCTCCCAGACCAGACACTTTACCTCCATTCTCAGGCGCTGAGGAGGGTGGAGCAGGCCTGCAATGCATATAGGGGAACAAAGGCCCAGAGACAGAGACGT	ACGTCTCTGTCTCTGGGCCTTTGTTCCCCTATATGCATTGCAGGCCTGCTCCACCCTCCTCAGCGCCTGAGAATGGAGGTAAAGTGTCTGGTCTGGGAGCTCGTTAACTATGCTGGGAAA[T/C]GGTCCAAAAGAATCAGAATTTGAGGTGTTTTGTTTTCATTTTTATTTCAAGTTGGACAGATCTTGGAGATAATTTCTTACCTCACATAGATGAGAAAACTAACACCCAGAAAGGAGAAAT	T	C	0.324523	0.00896406	0.675477	0.00896406	0.104993	0.00593728	0.43906	0.00593728	0.455947	0.00593728	1362	2	0.342311	0.43906	0.438415	0.0029455	0.956718	1	143	598	621	0.938674	1	157949715	-858		35	1401	mrna-utr	C/T	0.233134	0.24943	YES	2	2	2	1	reference
CRP_rs1205	CRP	http://www.ncbi.nlm.nih.gov/entrez/query.fcgi?db=gene&cmd=Retrieve&dopt=full_report&list_uids=1401	rs1205		http://www.ncbi.nlm.nih.gov/SNP/snp_ref.cgi?rs=1205	A	G	CCAAGGATTGAGTTATGGACTTTGGGAGTGAGACATCTTCTTGCTGCTGGATTTCCAAGCTGAGAGGACGTGAACCTGGGACCACCAGTAGCCATCTTGTTTGCCACATGGAGAGAGACT[A/G]TGAGGACAGAAGCCAAACTGGAAGTGGAGGAGCCAAGGGATTGACAAACAACAGAGCCTTGACCACGTGGAGTCTCTGAATCAGCCTTGTCTGGAACCAGATCTACACCTGGACTGCCCA	TGGGCAGTCCAGGTGTAGATCTGGTTCCAGACAAGGCTGATTCAGAGACTCCACGTGGTCAAGGCTCTGTTGTTTGTCAATCCCTTGGCTCCTCCACTTCCAGTTTGGCTTCTGTCCTCA[C/T]AGTCTCTCTCCATGTGGCAAACAAGATGGCTACTGGTGGTCCCAGGTTCACGTCCTCTCAGCTTGGAAATCCAGCAGCAAGAAGATGTCTCACTCCCAAAGTCCATAACTCAATCCTTGG	C	T	0.327827	0.00891323	0.672173	0.00891323	0.103524	0.00594106	0.448605	0.00594106	0.447871	0.00594106	1362	2	0.343599	0.448605	0.440713	0.436787	0.508678	0.535	141	611	610	0.865319	1	156495306	1205		35	1401	locus-region	C/T	0.432142	0.171243	YES	2	2	2	1	reference
CRP_rs1800947	CRP	http://www.ncbi.nlm.nih.gov/entrez/query.fcgi?db=gene&cmd=Retrieve&dopt=full_report&list_uids=1401	rs1800947		http://www.ncbi.nlm.nih.gov/SNP/snp_ref.cgi?rs=1800947	C	G	GGGCCACAGCTGGGGTTTGGTGAACACTTCGCCTTGCACTTCATACTTCAGTGCCCGCCAGTTCAGGACATTAGGACTGAAGGGCCCGCCAAGATAGATGGTGTTAATCTCATCTGGTGA[C/G]AGCACAAAGTCCCACATGTTCACATTTCCAATGTCTCCCACCAGGGACTGGCTTCCTTCAAAGTTCCCACCGAAGGAATCCTGCTCCTGCCCCAAGATGATGCTTGCTTCTGCCCCCACA	TGTGGGGGCAGAAGCAAGCATCATCTTGGGGCAGGAGCAGGATTCCTTCGGTGGGAACTTTGAAGGAAGCCAGTCCCTGGTGGGAGACATTGGAAATGTGAACATGTGGGACTTTGTGCT[C/G]TCACCAGATGAGATTAACACCATCTATCTTGGCGGGCCCTTCAGTCCTAATGTCCTGAACTGGCGGGCACTGAAGTATGAAGTGCAAGGCGAAGTGTTCACCAAACCCCAGCTGTGGCCC	C	G	0.932085	0.00478468	0.0679148	0.00478468	0.867841	0.00155735	0.128488	0.00155735	0.00367107	0.00155735	1362	2	0.11859	0.128488	0.126605	0.30119	0.583137	0.8293	1182	175	5	0.826341	1	156496511	-2570		35	1401	intron	C/G	0.0751748	0.178707	YES	2	2	2	1	reference
CRP_rs2808630	CRP	http://www.ncbi.nlm.nih.gov/entrez/query.fcgi?db=gene&cmd=Retrieve&dopt=full_report&list_uids=1401	rs2808630		http://www.ncbi.nlm.nih.gov/SNP/snp_ref.cgi?rs=2808630	A	G	ACTCTTTTCTAGTTAAATAATCCAGATACGTCTTAATTATAGAAGGCCATCCCAACTCCCCAGGGATGTAGGTTGAGCTAATATTTTCTTCAGAATTCAGTTGCTTGCATCTTACTATAC[A/G]TAGTCTGGTAGACAGCCTCTGGCCTTAATAATTTGAGCCAGGAAAATCTTAACAGCTGGTATTTGCATTCAGAGAACATTAAAAAATCTTAACAAAGCATTCGTAGGATGTTTAGATTTA	TAAATCTAAACATCCTACGAATGCTTTGTTAAGATTTTTTAATGTTCTCTGAATGCAAATACCAGCTGTTAAGATTTTCCTGGCTCAAATTATTAAGGCCAGAGGCTGTCTACCAGACTA[T/C]GTATAGTAAGATGCAAGCAACTGAATTCTGAAGAAAATATTAGCTCAACCTACATCCCTGGGGAGTTGGGATGGCCTTCTATAATTAAGACGTATCTGGATTATTTAACTAGAAAAGAGT	T	C	0.720631	0.0085922	0.279369	0.0085922	0.51909	0.00545221	0.403084	0.00545221	0.0778267	0.00545221	1362	2	0.321583	0.403084	0.402644	0.00162757	0.96782	1	707	549	106	0.956727	1	156493941	3797		35	1401	3', locus	C/T	0.327986	0.237525	YES	2	2	2	1	reference
CRP_rs3091244	CRP	http://www.ncbi.nlm.nih.gov/entrez/query.fcgi?db=gene&cmd=Retrieve&dopt=full_report&list_uids=1401	rs3091244		http://www.ncbi.nlm.nih.gov/SNP/snp_ref.cgi?rs=3091244	A	G	CAAACTCCTATGACTACTGAATTACCAATTCTTTATGACAGGAAAAATGAAGAAATCTCTCAGGGCTCCACTTTGGCTATCTATCCTGCGAAAATAATGGGAAATGGTAACATATTAAAC[A/G]AGTGGCCATCTGGGTGCACGTGGTAGCTGCCTCTCCAACACCTACTTCAGCCCAAATCATAGAGTTTGACAAAGGAAATCTGACAGCTTCTGGAGATGGACATTATCACTAACCCCTTTC	GAAAGGGGTTAGTGATAATGTCCATCTCCAGAAGCTGTCAGATTTCCTTTGTCAAACTCTATGATTTGGGCTGAAGTAGGTGTTGGAGAGGCAGCTACCACGTGCACCCAGATGGCCACT[T/C]GTTTAATATGTTACCATTTCCCATTATTTTCGCAGGATAGATAGCCAAAGTGGAGCCCTGAGAGATTTCTTCATTTTTCCTGTCATAAAGAATTGGTAATTCAGTAGTCATAGGAGTTTG	T	C	0.343245	0.00956687	0.656755	0.00956687	0.141703	0.00621417	0.403084	0.00621417	0.455213	0.00621417	1362	2	0.34922	0.403084	0.450856	15.2916	9.21272e-05	0.0001	193	549	620	0.831477	1	157951289	471		35	1401	locus-region	A/C/T	0.582849	0.165977	YES	2	2	2	1	reference
CRP_rs3093059	CRP	http://www.ncbi.nlm.nih.gov/entrez/query.fcgi?db=gene&cmd=Retrieve&dopt=full_report&list_uids=1401	rs3093059		http://www.ncbi.nlm.nih.gov/SNP/snp_ref.cgi?rs=3093059	A	G	CAACAGTCCCCAGAGTGTGATGTTCCCCTTCCTGTGTCCAAGTATTCTCATTGTTCAATTCCCATCTATGAGTGAGAACATGCGGTGTTTGGTTTTTTGCATGGACACATTTTCTCAGCC[A/G]ATTGAGTACACTTATTAAGAACTCTCTAGACATCTTGGCACTAAATGACGGCCCTGACAGTAAAAGTCCAGTAAAATGTGTGCCTGATCACAGACATAGCATTATATCAAAGTTTCTTCC	GGAAGAAACTTTGATATAATGCTATGTCTGTGATCAGGCACACATTTTACTGGACTTTTACTGTCAGGGCCGTCATTTAGTGCCAAGATGTCTAGAGAGTTCTTAATAAGTGTACTCAAT[C/T]GGCTGAGAAAATGTGTCCATGcaaaaaaccaaacaccgcatgttctcactcatagatgggaattgaacaatgagaatacttggacacaggaaggggaacatcacactctggggactgttg	C	T	0.941263	0.00436231	0.0587372	0.00436231	0.882526	0.000512459	0.117474	0.000512459			1362	2	0.104461	0.117474	0.110574	5.30373	0.0212799	0.0122	1202	160	0	0.962673	1	157951760			35	1401	locus-region	C/T	0.317925	0.240596	YES	2	2	2	1	reference
CTGF_rs928501	CTGF	http://www.ncbi.nlm.nih.gov/entrez/query.fcgi?db=gene&cmd=Retrieve&dopt=full_report&list_uids=1490	rs928501		http://www.ncbi.nlm.nih.gov/SNP/snp_ref.cgi?rs=928501	A	C	ACACAAATTCAAAGATCTTTTTCTCCCAACTCTGACCTGCTGTCAATCAAAGGGGCTGGGGTAAGTCAAAGTTGGATGAAGTTATAAGAAGCCACTATTTCCCACTTTACCGCCCAGGCA[A/C]ACACAAACATTTGCTGAGTCATTGATAATAGTGCAAGAATTCAGATCCCATGGCATGAATTATGGATGGAGTATCAGCCTTTCCCTTTGAGTTTCCTGGCATTTGATGGTCCATATCACA	ACACAAATTCAAAGATCTTTTTCTCCCAACTCTGACCTGCTGTCAATCAAAGGGGCTGGGGTAAGTCAAAGTTGGATGAAGTTATAAGAAGCCACTATTTCCCACTTTACCGCCCAGGCA[A/C]ACACAAACATTTGCTGAGTCATTGATAATAGTGCAAGAATTCAGATCCCATGGCATGAATTATGGATGGAGTATCAGCCTTTCCCTTTGAGTTTCCTGGCATTTGATGGTCCATATCACA	A	C	0.251468	0.00809709	0.748532	0.00809709	0.0535977	0.00491909	0.395742	0.00491909	0.550661	0.00491909	1362	2	0.305602	0.395742	0.376464	3.57132	0.0587856	0.0629	73	539	750	0.869259	6	132317130			35	1490	.	A/C	0.366127	0.221392	YES	2	2	2	1	reference
CTGF_rs9399005	CTGF	http://www.ncbi.nlm.nih.gov/entrez/query.fcgi?db=gene&cmd=Retrieve&dopt=full_report&list_uids=1490	rs9399005		http://www.ncbi.nlm.nih.gov/SNP/snp_ref.cgi?rs=9399005	A	G	TTTTGTTATCTTCACAGAACTTTATAGACACTTTAAATTCAATTCTCTCTAGATTACTTCAGTCTCCATTAACCCTGTTGTATTACACTTGGTCCTTTTGGCATTTGTACCTCTCTGGCC[A/G]TTATAGGTTAGTTTCCAACCCTTCACATCACAAACTAGTCTATGTGCCTTGCACGTGGAAAATGTTTACATTTTTTAAAAATTTTATGCTCTAGGTCTGTTTCTGAACTTCATTACCTTA	TAAGGTAATGAAGTTCAGAAACAGACCTAGAGCATAAAATTTTTAAAAAATGTAAACATTTTCCACGTGCAAGGCACATAGACTAGTTTGTGATGTGAAGGGTTGGAAACTAACCTATAA[C/T]GGCCAGAGAGGTACAAATGCCAAAAGGACCAAGTGTAATACAACAGGGTTAATGGAGACTGAAGTAATCTAGAGAGAATTGAATTTAAAGTGTCTATAAAGTTCTGTGAAGATAACAAAA	C	T	0.26395	0.00838291	0.73605	0.00838291	0.0668135	0.00521914	0.394273	0.00521914	0.538913	0.00521914	1362	2	0.313071	0.394273	0.388561	0.294358	0.587441	0.6261	91	537	734	0.878724	6	132310657	-88108090		35	1490	locus-region	C/T	0.402182	0.198345	YES	2	2	2	1	reference
CXCL12_rs1413519	CXCL12	http://www.ncbi.nlm.nih.gov/entrez/query.fcgi?db=gene&cmd=Retrieve&dopt=full_report&list_uids=6387	rs1413519		http://www.ncbi.nlm.nih.gov/SNP/snp_ref.cgi?rs=1413519	C	G	ACCTAGGATCTGTCCCAGAAGCCTGAAAGGCCCGCGTGGGCTGAGTCGAGGGCGAACCAGGGATTCAGGCCTGGCCGCTGCCCCTCCCGCAGGCGCCCTGAGGCCCCAGAACAGAAGCTA[C/G]TGTGGCACCCATGGGGCCATCCCTTCCGCTAGTCGTTCGTTAAATACTTACTGAGCACCCACTATGTGCTAGACCTGGGCTACATGTTTGAAGTAGTTTAGAAAAGGCACTAAACGTTTA	ACCTAGGATCTGTCCCAGAAGCCTGAAAGGCCCGCGTGGGCTGAGTCGAGGGCGAACCAGGGATTCAGGCCTGGCCGCTGCCCCTCCCGCAGGCGCCCTGAGGCCCCAGAACAGAAGCTA[C/G]TGTGGCACCCATGGGGCCATCCCTTCCGCTAGtcgttcgttaaatacttactgagcacccactatgtgctagacctgggctaCATGTTTGAAGTAGTTTAGAAAAGGCACTAAACGTTTA	C	G	0.162996	0.00713039	0.837004	0.00713039	0.0286344	0.00378839	0.268722	0.00378839	0.702643	0.00378839	1362	2	0.235631	0.268722	0.272856	0.312583	0.576099	0.5504	39	366	957	0.968314	10	44202567	-12321		35	6387	.	C/G			YES	2	2	2	1	reference
CXCL12_rs197452	CXCL12	http://www.ncbi.nlm.nih.gov/entrez/query.fcgi?db=gene&cmd=Retrieve&dopt=full_report&list_uids=6387	rs197452		http://www.ncbi.nlm.nih.gov/SNP/snp_ref.cgi?rs=197452	A	G	CTAATCTGGACCGGGAGGATGGAAGAGCAAGGACCCCATTTCAGTAGTGCTCGGAAAAAGGATGCGTTGAATTTCTCAGCCCTTCTCCACCTCACATAAACACCCGCCCACCCTGCACCC[A/G]GATCCTGGGTCATAATTTTAATAAATGCAGAAAGAGAAAGTGGTTGGAGGATGGAGCACATGGAATTCAGGAGAAAACCCACAAAGACCCCTGCATGTCAGACACACCCTGTCCCGGAGC	GCTCCGGGACAGGGTGTGTCTGACATGCAGGGGTCTTTGTGGGTTTTCTCCTGAATTCCATGTGCTCCATCCTCCAACCACTTTCTCTTTCTGCATTTATTAAAATTATGACCCAGGATC[C/T]GGGTGCAGGGTGGGCGGGTGTTTATGTGAGGTGGAGAAGGGCTGAGAAATTCAACGCATCCTTTTTCCGAGCACTACTGAAATGGGGTCCTTGCTCTTCCATCCTCCCGGTCCAGATTAG	C	T	0.153451	0.00668614	0.846549	0.00668614	0.0154185	0.00307804	0.276065	0.00307804	0.708517	0.00307804	1362	2	0.226057	0.276065	0.259807	5.33299	0.0209254	0.0207	21	376	965	0.800754	10	44190246	1308		35	6387	intron	C/T			YES	2	2	2	1	reference
CXCL12_rs2297630	CXCL12	http://www.ncbi.nlm.nih.gov/entrez/query.fcgi?db=gene&cmd=Retrieve&dopt=full_report&list_uids=6387	rs2297630		http://www.ncbi.nlm.nih.gov/SNP/snp_ref.cgi?rs=2297630	A	G	GCTTCTTTTTTCCTATCTTTTCTTTTTTCCCCACTTTTTCTTCTCTGCGCCCCCTTAGATAAAATTAGTAGAACCATTAATAATGTGGAAATAAACAAAAGTTCGTCTCAGTCTGCATAA[A/G]ATTTAACACTGGCCCGTGTACTGGTTAAACTGTGCCTTCAGTCTCAGGCCTGGAGGCCCCTGGTCAAAGCACTGTTTATCAGTAATTCATTAAAATAAATTGGACATTTCCTTCCATTCA	GCTTCTTTTTTCCTATCTTTTCTTTTTTCCCCACTTTTTCTTCTCTGCGCCCCCTTAGATAAAATTAGTAGAACCATTAATAATGTGGAAATAAACAAAAGTTCGTCTCAGTCTGCATAA[G/A]ATTTAACACTGGCCCGTGTACTGGTTAAACTGTGCCTTCAGTCTCAGGCCTGGAGGCCCCTGGTCAAAGCACTGTTTATCAGTAATTCATTAAAATAAATTGGACATTTCCTTCCATTCA	G	A	0.253671	0.00816289	0.746329	0.00816289	0.0565345	0.00498788	0.394273	0.00498788	0.549192	0.00498788	1362	2	0.306958	0.394273	0.378644	2.32048	0.127681	0.1299	77	537	748	0.935423	10	44191554	-486		35	6387	intron	A/G	0.231464	0.249312	YES	2	2	2	1	reference
CXCL12_rs266087	CXCL12	http://www.ncbi.nlm.nih.gov/entrez/query.fcgi?db=gene&cmd=Retrieve&dopt=full_report&list_uids=6387	rs266087		http://www.ncbi.nlm.nih.gov/SNP/snp_ref.cgi?rs=266087	A	G	ATGCAGACTGCAAGTGTGTGGAGCTGGTGAGCTCCCCAGTGAGCGCAGGCCTTCTAAGAGAGGAAGTGGAGGGC[A/G]GGCTGGGGGGCTCAGCAACCTGGGCATTCCTGGAGCTCCCAGGCTATTCTGGACAGAGTCCTGAGCACACAGGCTCCGCGTCACAGACCCCCGCCCCAGTCTCTGCACAACTACTTTCTT	ATGCAGACTGCAAGTGTGTGGAGCTGGTGAGCTCCCCAGTGAGCGCAGGCCTTCTAAGAGAGGAAGTGGAGGGC[A/G]GGCTGGGGGGCTCAGCAACCTGGGCATTCCTGGAGCTCCCAGGCTATTCTGGACAGAGTCCTGAGCACACAGGCTCCGCGTCACAGACCCCCGCCCCAGTCTCTGCACAACTACTTTCTT	A	G	0.366176	0.00918806	0.633824	0.00918806	0.131618	0.00628277	0.469118	0.00628277	0.399265	0.00628277	1360	2	0.35645	0.469118	0.464183	0.153729	0.694997	0.717	179	638	543	0.828886	10	44191068	10576		35	6387	intron	A/G			YES	2	2	2	1	reference
CXCL12_rs2839685	CXCL12	http://www.ncbi.nlm.nih.gov/entrez/query.fcgi?db=gene&cmd=Retrieve&dopt=full_report&list_uids=6387	rs2839685		http://www.ncbi.nlm.nih.gov/SNP/snp_ref.cgi?rs=2839685	A	G	CCAGAAAACTCTTCCCACGGAGCCGTCCCTCGGCGGTGCTTAGCCCTCCGGATACCCCCGAGACATCCCAGATGGCCCCAGTCCGGTGGCGAAGGGAGGGTGCAGGTCGGCACCCAGGAG[A/G]CGTGGGGGTGAGGAGAGCGCCCCTTTGGGCCTCGCTTTGTGACCGCAGGCTGCCCCAGCCACCTCTCTGTGTCCTTCCCAGCACAGCGTCCAGCGAAGTGGGGTCAGTCGCCGCGTCCAT	ATGGACGCGGCGACTGACCCCACTTCGCTGGACGCTGTGCTGGGAAGGACACAGAGAGGTGGCTGGGGCAGCCTGCGGTCACAAAGCGAGGCCCAAAGGGGCGCTCTCCTCACCCCCACG[C/T]CTCCTGGGTGCCGACCTGCACCCTCCCTTCGCCACCGGACTGGGGCCATCTGGGATGTCTCGGGGGTATCCGGAGGGCTAAGCACCGCCGAGGGACGGCTCCGTGGGAAGAGTTTTCTGG	C	T	0.133554	0.00660245	0.866446	0.00660245	0.0206034	0.00330773	0.225901	0.00330773	0.753495	0.00330773	1359	2	0.204654	0.225901	0.231435	0.776862	0.378103	0.3505	28	307	1024	0.81472	10	44201644	3321		35	6387	locus-region	C/T	0.255	0.24995	YES	2	2	2	1	reference
CXCL12_rs2861442	CXCL12	http://www.ncbi.nlm.nih.gov/entrez/query.fcgi?db=gene&cmd=Retrieve&dopt=full_report&list_uids=6387	rs2861442		http://www.ncbi.nlm.nih.gov/SNP/snp_ref.cgi?rs=2861442	A	G	TGCCTCAGCACTGTCCAGCAAGGAAGTCTTTGGGCAGAGCCTGCTCAGACAGAAGTCCTGGCCTGCTAGACGTGCACATACCCTGACGGTAAGCCTTGCTTGCCCACACATGTGCCCAGA[A/G]CCAGTGGGGATCAGCTCTGCCTCCCAGGGGTCCTTCCCTCTAGGGCAGCCTGGGGCTGTTTGCAACTGGCTCTTGAGGCCAGTGGGGATCTAGACAGGAAAAACATGGCCAGCTGGTCAA	TGCCTCAGCACTGTCCAGCAAGGAAGTCTTTGGGCAGAGCCTGCTCAGACAGAAGTCCTGGCCTGCTAGACGTGCACATACCCTGACGGTAAGCCTTGCTTGCCCACACATGTGCCCAGA[G/A]CCAGTGGGGATCAGCTCTGCCTCCCAGGGGTCCTTCCCTCTAGGGCAGCCTGGGGCTGTTTGCAACTGGCTCTTGAGGCCAGTGGGGATCTAGACAGGAAAAACATGGCCAGCTGGTCAA	G	A	0.696769	0.00863337	0.303231	0.00863337	0.477239	0.00563804	0.43906	0.00563804	0.0837004	0.00563804	1362	2	0.333284	0.43906	0.422564	2.07579	0.149652	0.1632	650	598	114	0.870395	10	44204965			35	6387	.	A/G	0.292695	0.246327	YES	2	2	2	1	reference
[truncated: 998 more rows]
[truncated: 20 more columns]
