# Supplementary material for: Multiple Superoxide Dismutase 1/Splicing Factor Serine Alanine 15 Variants Are Associated With the Development and Progression of Diabetic Nephropathy
Source: Oxford University Press journal article supplement (doi:10.2337/db07-1059), 2007-10-04
Supplement: db071059ola4.xls [file db071059ola4.xls]

## Sheet: covariates
	cohort							sex							treatment							stimulated c-peptide																age of diabetes diagnosis
Locus	AA_0_cohort	AB_0_cohort	BB_0_cohort	AA_1_cohort	AB_1_cohort	BB_1_cohort	Pvalue_cohort	AA_m_sex	AB_m_sex	BB_m_sex	AA_f_sex	AB_f_sex	BB_f_sex	Pvalue_sex	AA_0_trx	AB_0_trx	BB_0_trx	AA_1_trx	AB_1_trx	BB_1_trx	Pvalue_trx	AA_N_b_bcval5	AA_MIN_b_bcval5	AA_MAX_b_bcval5	AA_MEAN_b_bcval5	AA_STD_b_bcval5	AB_N_b_bcval5	AB_MIN_b_bcval5	AB_MAX_b_bcval5	AB_MEAN_b_bcval5	AB_STD_b_bcval5	BB_N_b_bcval5	BB_MIN_b_bcval5	BB_MAX_b_bcval5	BB_MEAN_b_bcval5	BB_STD_b_bcval5	b_bcval5_KW_Pvalue	AA_N_agediag	AA_MIN_agediag	AA_MAX_agediag	AA_MEAN_agediag	AA_STD_agediag	AB_N_agediag	AB_MIN_agediag	AB_MAX_agediag	AB_MEAN_agediag	AB_STD_agediag	BB_N_agediag	BB_MIN_agediag
ABCA1_rs10512335	603	76	5	587	87	4	0.607839	648	63	7	542	100	2	0.00014921	605	85	1	585	78	8	0.0553673	1190	0.01	0.5	0.114622	0.119578	163	0.01	0.44	0.106871	0.11153	9	0.01	0.39	0.11	0.138924	0.671452	1190	0	38	21.2824	8.02158	163	0	38	20.7914	8.5248	9	5
ABCA1_rs10521071	651	31	2	645	32	1	0.961539	684	33	1	612	30	2	0.84479	665	25	1	631	38	2	0.137394	1296	0.01	0.5	0.113457	0.118244	63	0.01	0.49	0.115397	0.125465	3	0.04	0.41	0.166667	0.210792	0.696978	1296	0	38	21.1466	8.07246	63	0	36	22	8.23055	3	25
ABCA1_rs10820743	330	290	64	313	301	64	0.736509	335	317	66	308	274	62	0.836352	320	308	63	323	283	65	0.668016	643	0.01	0.5	0.113935	0.118492	591	0.01	0.5	0.11203	0.118301	128	0.01	0.45	0.119844	0.122378	0.940343	643	0	38	21.4308	8.29364	591	0	38	20.9492	7.83673	128	0
ABCA1_rs12344687	5	108	571	4	107	567	1	5	108	605	4	107	533	0.734244	6	117	568	3	98	570	0.323366	9	0.03	0.41	0.162222	0.131888	215	0.01	0.5	0.117349	0.12322	1138	0.01	0.5	0.112583	0.117755	0.195815	9	8	36	24.4444	9.38231	215	0	38	22.0605	7.94791	1138	0
ABCA1_rs12346461	626	56	1	623	54	1	0.960417	661	56	1	588	54	1	0.846158	636	54	0	613	56	2	0.443332	1249	0.01	0.5	0.112986	0.117989	110	0.01	0.5	0.121818	0.128128	2	0.03	0.15	0.09	0.0848528	0.769718	1249	0	38	21.1809	8.04351	110	1	38	21.2727	8.5057	2	20
ABCA1_rs1331924	487	177	20	520	146	12	0.0509789	527	177	14	480	146	18	0.436261	527	145	19	480	178	13	0.0415112	1007	0.01	0.5	0.114687	0.119362	323	0.01	0.5	0.11031	0.116381	32	0.01	0.48	0.115312	0.124512	0.929821	1007	0	38	21.2423	8.07611	323	0	38	21.0248	8.00772	32	0
ABCA1_rs1800977	77	320	287	104	298	276	0.0830359	93	329	296	88	289	267	0.901492	89	321	281	92	297	282	0.707737	181	0.01	0.49	0.111271	0.119229	618	0.01	0.49	0.113932	0.116763	563	0.01	0.5	0.114139	0.120849	0.913705	181	3	37	21.2873	8.09769	618	0	38	21.2573	8.14855	563	0
ABCA1_rs1929841	451	207	26	426	222	30	0.472317	459	233	26	418	196	30	0.511485	451	209	31	426	220	25	0.517631	877	0.01	0.5	0.115359	0.11921	429	0.01	0.49	0.109091	0.116374	56	0.01	0.45	0.122143	0.12926	0.253167	877	0	38	21.3546	7.95139	429	0	38	20.8998	8.36781	56	2
ABCA1_rs1929842	414	234	36	392	248	38	0.597337	425	256	37	381	226	37	0.877044	416	237	38	390	245	36	0.696205	806	0.01	0.5	0.113139	0.117145	482	0.01	0.5	0.115726	0.122206	74	0.01	0.45	0.105946	0.113631	0.968825	806	0	38	21.3089	7.96421	482	0	38	21	8.28344	74	2
ABCA1_rs1999431	634	50		626	52		0.837239	667	51		593	51		0.60673	644	47		616	55		0.354805	1260	0.01	0.5	0.113183	0.118059	102	0.01	0.49	0.119608	0.126951						0.559282	1260	0	38	21.1714	8.07918	102	5	37	21.6176	8.15329
ABCA1_rs2000069	141	311	232	142	345	191	0.0580369	138	348	232	145	308	191	0.278637	147	320	224	136	336	199	0.368439	283	0.01	0.49	0.117032	0.120853	656	0.01	0.5	0.113247	0.118903	423	0.01	0.5	0.112057	0.117196	0.587038	283	0	37	20.3392	8.2847	656	0	38	21.5015	8.26914	423	2
ABCA1_rs2065412	248	314	122	247	327	104	0.436742	276	325	117	219	316	109	0.229777	252	318	121	243	323	105	0.595603	495	0.01	0.5	0.109677	0.113715	641	0.01	0.5	0.119704	0.123435	226	0.01	0.48	0.105265	0.11534	0.150193	495	0	38	21.1333	7.82206	641	0	38	21.4602	8.25731	226	2
ABCA1_rs2066716	6	113	565	5	93	580	0.346567	4	101	613	7	105	532	0.282528	8	91	592	3	115	553	0.0463525	11	0.01	0.48	0.0963636	0.153184	206	0.01	0.48	0.108689	0.107973	1145	0.01	0.5	0.114725	0.120261	0.330491	11	10	33	21.5455	7.8021	206	0	38	21.1359	8.21961	1145	0
ABCA1_rs2066717	3	74	607	2	77	599	0.87221	2	84	632	3	67	574	0.648864	2	76	613	3	75	593	0.914173	5	0.01	0.48	0.15	0.197864	151	0.01	0.5	0.116358	0.123318	1206	0.01	0.5	0.113176	0.117843	0.988182	5	4	34	24.6	12.3207	151	0	38	20.4834	7.99654	1206	0
ABCA1_rs2230805	47	259	378	54	251	373	0.737081	59	269	390	42	241	361	0.47495	47	252	392	54	258	359	0.428198	101	0.01	0.5	0.107723	0.117872	510	0.01	0.49	0.120765	0.119897	751	0.01	0.5	0.10964	0.117937	0.196491	101	1	37	21.3564	8.69895	510	0	38	21.2275	8.25045	751	0
ABCA1_rs2253175	52	265	367	60	269	349	0.603426	60	281	377	52	253	339	0.985755	53	259	379	59	275	337	0.228102	112	0.01	0.5	0.118482	0.119739	534	0.01	0.49	0.113876	0.117799	716	0.01	0.5	0.112751	0.119373	0.864684	112	2	37	21.5625	8.51896	534	0	38	21.0318	8.24513	716	0
ABCA1_rs2254884	327	295	62	369	256	53	0.0506294	372	279	67	324	272	48	0.286174	365	268	58	331	283	57	0.406263	696	0.01	0.5	0.109368	0.117414	551	0.01	0.5	0.119292	0.120259	115	0.01	0.48	0.112696	0.118975	0.202652	696	0	38	21.0948	8.08211	551	0	38	21.4338	8.01037	115	0
ABCA1_rs2274873	11	120	553	6	133	539	0.32511	11	144	563	6	109	529	0.193741	8	133	550	9	120	542	0.790957	17	0.03	0.34	0.135882	0.109719	253	0.01	0.5	0.117115	0.118288	1092	0.01	0.5	0.112518	0.118994	0.410999	17	11	36	22.4118	7.10685	253	0	38	20.917	8.4706	1092	0
ABCA1_rs2275542	69	301	314	71	319	288	0.437145	73	335	310	67	285	292	0.668089	78	310	303	62	310	299	0.466533	140	0.01	0.49	0.116643	0.117281	620	0.01	0.5	0.110339	0.116975	602	0.01	0.5	0.116395	0.120904	0.455408	140	3	36	20.2429	8.12215	620	0	38	21.1145	8.24982	602	1
ABCA1_rs2275544	511	150	23	501	164	13	0.17263	548	150	20	464	164	16	0.137623	523	146	22	489	168	14	0.125322	1012	0.01	0.5	0.11413	0.119341	314	0.01	0.49	0.11	0.114339	36	0.01	0.42	0.1325	0.13851	0.910643	1012	0	38	21.3024	7.92232	314	0	38	20.8439	8.63039	36	0
ABCA1_rs2297406	73	279	332	68	290	320	0.746984	84	296	338	57	273	314	0.227503	81	276	334	60	293	318	0.154146	141	0.01	0.5	0.115816	0.12558	569	0.01	0.49	0.109279	0.114591	652	0.01	0.5	0.117025	0.120766	0.462869	141	3	37	22.2837	7.69631	569	0	38	20.8981	7.97356	652	0
ABCA1_rs2297409	30	200	454	22	215	441	0.387402	29	217	472	23	198	423	0.894211	29	200	462	23	215	433	0.387325	52	0.01	0.48	0.121538	0.124544	415	0.01	0.5	0.108	0.110432	895	0.01	0.5	0.115832	0.122058	0.555352	52	1	35	20.6154	7.52813	415	0	38	21.1831	8.26436	895	0
ABCA1_rs2472448	11	125	548	10	122	546	0.971511	9	131	578	12	116	516	0.677013	9	106	576	12	141	518	0.0166665	21	0.01	0.42	0.12381	0.126193	247	0.01	0.49	0.115951	0.119333	1094	0.01	0.5	0.112952	0.118522	0.85745	21	6	35	22.9048	7.89243	247	1	37	21.1053	8.09026	1094	0
ABCA1_rs2472495	414	241	29	411	224	43	0.188174	435	244	39	390	221	33	0.964973	426	227	38	399	238	34	0.593469	825	0.01	0.5	0.111818	0.118253	465	0.01	0.49	0.117613	0.120945	72	0.01	0.41	0.109306	0.109947	0.835922	825	0	38	21.0073	8.14641	465	2	38	21.514	7.93755	72	6
ABCA1_rs2472510	372	264	48	364	256	58	0.57373	388	273	57	348	247	49	0.974545	376	252	63	360	268	43	0.116097	736	0.01	0.5	0.113587	0.120269	520	0.01	0.49	0.111962	0.116122	106	0.01	0.45	0.122547	0.121099	0.534326	736	0	38	21.2622	8.08765	520	0	38	20.8942	7.96224	106	6
ABCA1_rs2482430	20	193	471	22	199	457	0.841123	31	201	486	11	191	442	0.0182397	23	204	464	19	188	464	0.686354	42	0.01	0.47	0.0964286	0.11476	392	0.01	0.5	0.119286	0.121786	928	0.01	0.5	0.112069	0.117568	0.221448	42	3	35	20.0714	7.38949	392	0	38	21.3699	8.11827	928	0
ABCA1_rs2482432	211	333	140	208	321	149	0.782593	225	353	140	194	301	149	0.261587	208	344	139	211	310	150	0.385971	419	0.01	0.49	0.103174	0.110077	654	0.01	0.5	0.120688	0.124672	289	0.01	0.49	0.112976	0.116169	0.20032	419	0	38	21.7375	7.88177	654	0	38	20.9312	8.28696	289	2
ABCA1_rs2487052	25	232	427	43	215	420	0.0649829	38	246	434	30	201	413	0.377844	36	223	432	32	224	415	0.870632	68	0.01	0.41	0.113235	0.112587	447	0.01	0.49	0.114564	0.120595	847	0.01	0.5	0.113223	0.118319	0.996531	68	6	36	21.5441	7.88809	447	3	38	21.5257	7.93831	847	0
ABCA1_rs2487054	246	320	118	234	320	124	0.811052	251	331	136	229	309	106	0.482545	246	317	128	234	323	114	0.650464	480	0.01	0.49	0.109646	0.118039	640	0.01	0.5	0.118141	0.121214	242	0.01	0.5	0.109793	0.113282	0.653481	480	4	38	21.2354	8.14231	640	0	38	21.3094	7.94216	242	0
ABCA1_rs2515614	311	298	75	290	308	80	0.597555	335	301	82	266	305	73	0.107354	306	302	83	295	304	72	0.702767	601	0.01	0.5	0.115524	0.122337	606	0.01	0.49	0.110165	0.114649	155	0.01	0.45	0.120129	0.120373	0.381879	601	0	38	21.391	8.00407	606	0	38	20.8383	8.02559	155	5
ABCA1_rs2515616	30	228	426	30	204	444	0.432503	34	237	447	26	195	423	0.408276	28	216	447	32	216	423	0.729309	60	0.01	0.44	0.106	0.117115	432	0.01	0.49	0.11162	0.117427	870	0.01	0.5	0.115207	0.11955	0.727854	60	11	38	23.1	7.65949	432	1	38	20.9792	8.11415	870	0
ABCA1_rs2515629	476	186	22	462	185	31	0.425256	484	203	31	454	168	22	0.418858	479	189	23	459	182	30	0.567391	938	0.01	0.5	0.111173	0.11785	371	0.01	0.5	0.119919	0.121519	53	0.01	0.43	0.113962	0.114511	0.490303	938	0	38	21.2228	8.07664	371	0	37	21.2426	8.10341	53	6
ABCA1_rs2575878	127	326	231	113	325	240	0.619733	118	343	257	122	308	214	0.394609	124	328	239	116	323	232	0.949371	240	0.01	0.47	0.107792	0.112334	651	0.01	0.5	0.116237	0.120836	471	0.01	0.49	0.1131	0.119039	0.734233	240	1	38	21.8458	7.90776	651	0	38	21.1905	8.21934	471	0
ABCA1_rs2740479	308	295	81	300	319	59	0.107714	328	306	84	280	308	56	0.0679541	321	294	76	287	320	64	0.156529	608	0.01	0.5	0.119951	0.125367	614	0.01	0.5	0.10614	0.1103	140	0.01	0.48	0.119357	0.123453	0.110923	608	1	38	21.5806	7.94462	614	0	38	20.7003	8.1953	140	0
ABCA1_rs2740484	78	305	301	81	318	279	0.565906	77	323	318	82	300	262	0.304503	85	314	292	74	309	288	0.771069	159	0.01	0.49	0.118805	0.12842	623	0.01	0.49	0.115875	0.118379	580	0.01	0.5	0.109879	0.116378	0.697052	159	1	38	21.3711	8.21511	623	2	38	20.9053	8.17881	580	0
ABCA1_rs2777793	166	331	187	171	331	176	0.822419	192	348	178	145	314	185	0.10871	173	335	183	164	327	180	0.969212	337	0.01	0.49	0.113442	0.119948	662	0.01	0.5	0.116057	0.120959	363	0.01	0.47	0.109504	0.113509	0.729159	337	0	37	20.6617	7.87201	662	0	38	21.2205	8.24491	363	0
ABCA1_rs2777805	411	231	42	396	246	36	0.554286	423	250	45	384	227	33	0.674067	414	229	48	393	248	30	0.0753903	807	0.01	0.5	0.115948	0.121939	477	0.01	0.5	0.110713	0.114425	78	0.01	0.48	0.108077	0.111193	0.397672	807	0	38	21.3346	7.96235	477	0	38	20.8658	8.37506	78	1
ABCA1_rs2791952	4	123	557	8	111	559	0.378252	10	134	574	2	100	542	0.0260605	5	119	567	7	115	549	0.856508	12	0.01	0.34	0.0833333	0.0920803	234	0.01	0.5	0.121111	0.126815	1116	0.01	0.49	0.112428	0.117193	0.725651	12	10	35	23	8.11284	234	0	38	20.5769	7.689	1116	0
ABCA1_rs3758294	417	237	30	413	227	38	0.564477	427	252	39	403	212	29	0.454138	424	237	30	406	227	38	0.546767	830	0.01	0.5	0.11006	0.114914	464	0.01	0.5	0.121746	0.125287	68	0.01	0.45	0.1025	0.11688	0.171571	830	0	38	21.106	8.23865	464	0	38	21.3319	7.88153	68	4
ABCA1_rs3780541	574	104	6	582	94	2	0.283005	600	113	5	556	85	3	0.345732	591	96	4	565	102	4	0.81907	1156	0.01	0.5	0.113841	0.119633	198	0.01	0.5	0.112424	0.113755	8	0.03	0.34	0.11875	0.119096	0.875093	1156	0	38	21.3106	8.07366	198	0	38	20.5	8.12388	8	12
ABCA1_rs3780543	535	137	12	526	143	9	0.729121	561	144	13	500	136	8	0.645757	538	140	13	523	140	8	0.58816	1061	0.01	0.49	0.114581	0.119314	280	0.01	0.5	0.109393	0.114335	21	0.01	0.48	0.124286	0.147329	0.808485	1061	0	38	21.3638	8.04724	280	0	38	20.4571	8.06281	21	4
ABCA1_rs3818688	4	85	592	8	81	584	0.51778	7	94	612	5	72	564	0.505163	7	80	600	5	86	576	0.685493	12	0.03	0.39	0.105	0.120718	166	0.01	0.5	0.118916	0.125963	1176	0.01	0.5	0.113036	0.117501	0.958294	12	9	37	25.25	8.11424	166	4	38	20.4277	8.24203	1176	0
ABCA1_rs3824478	2	74	608	1	74	603	1	3	73	642	0	75	569	0.226821	2	77	612	1	71	599	0.845429	3	0.03	0.11	0.07	0.04	148	0.01	0.5	0.104189	0.110687	1211	0.01	0.5	0.11493	0.11976	0.655177	3	22	31	27.3333	4.72582	148	1	36	20.5	8.34095	1211	0
ABCA1_rs3847301	528	138	18	516	150	12	0.407982	562	141	15	482	147	15	0.325024	538	136	17	506	152	13	0.349533	1044	0.01	0.5	0.115287	0.120607	288	0.01	0.49	0.106458	0.109299	30	0.01	0.42	0.126333	0.138601	0.951194	1044	0	38	21.2596	7.96509	288	0	38	20.9931	8.51561	30	0
ABCA1_rs3904997	22	245	417	29	257	392	0.368303	30	277	411	21	225	398	0.201584	33	251	407	18	251	402	0.127733	51	0.01	0.42	0.114118	0.112839	502	0.01	0.5	0.112311	0.118811	809	0.01	0.5	0.114475	0.119142	0.768783	51	8	36	21.2745	8.52779	502	0	38	20.7052	8.02098	809	0
ABCA1_rs4149281	8	151	525	14	168	496	0.18672	8	178	532	14	141	489	0.161193	8	160	523	14	159	498	0.377022	22	0.01	0.39	0.0813636	0.110466	319	0.01	0.48	0.105266	0.109753	1021	0.01	0.5	0.116983	0.121414	0.104552	22	7	33	19.8182	7.70675	319	0	37	20.721	8.60053	1021	0
ABCA1_rs4149290	540	132	12	530	140	8	0.566029	555	154	9	515	118	11	0.306667	544	140	7	526	132	13	0.363109	1070	0.01	0.5	0.112009	0.118414	272	0.01	0.5	0.116985	0.120079	20	0.03	0.34	0.157	0.112208	0.0744468	1070	0	38	21.2168	8.04836	272	0	38	20.9118	8.19636	20	11
ABCA1_rs4149316	4	95	585	5	104	569	0.725453	3	116	599	6	83	555	0.126061	5	104	582	4	95	572	0.838762	9	0.01	0.33	0.0766667	0.0998749	199	0.01	0.5	0.127387	0.132349	1154	0.01	0.5	0.111586	0.116232	0.299703	9	20	36	25.6667	6.10328	199	0	38	20.4774	8.2913	1154	0
ABCA1_rs914544	633	50	1	611	66	1	0.203265	654	62	2	590	54	0	0.621842	626	63	2	618	53	0	0.30582	1244	0.01	0.5	0.114526	0.119043	116	0.01	0.5	0.104828	0.116204	2	0.07	0.11	0.09	0.0282843	0.334577	1244	0	38	21.324	8.04235	116	2	36	19.7759	8.3947	2	29
ABCC9_rs10841907	455	214	15	459	194	25	0.18129	482	216	20	432	192	20	0.935688	461	220	10	453	188	30	0.00188227	914	0.01	0.5	0.10907	0.115202	408	0.01	0.5	0.123162	0.124997	40	0.01	0.48	0.12175	0.1286	0.359677	914	0	38	21.0875	8.08749	408	0	38	21.4534	8.10119	40	2
ABCC9_rs1352909	404	253	26	407	236	35	0.389333	418	265	34	393	224	27	0.583351	417	251	22	394	238	39	0.0671519	811	0.01	0.5	0.109556	0.115095	489	0.01	0.5	0.1191	0.123783	61	0.01	0.48	0.124754	0.124948	0.647379	811	0	38	20.9864	8.11026	489	0	38	21.6094	8.08819	61	2
ABCC9_rs1388698	215	335	134	214	344	120	0.646365	228	361	129	201	318	125	0.796915	198	359	134	231	320	120	0.071881	429	0.01	0.5	0.110047	0.116831	679	0.01	0.49	0.11732	0.120555	254	0.01	0.5	0.11	0.117042	0.64946	429	2	38	21.0769	8.06117	679	0	38	21.3918	8.05107	254	0
ABCC9_rs17335932	639	44	1	626	52	0	0.398028	665	53	0	600	43	1	0.594439	636	54	1	629	42	0	0.290158	1265	0.01	0.5	0.113755	0.119286	96	0.01	0.47	0.112917	0.112014	1	0.07	0.07	0.07		0.927158	1265	0	38	21.1613	8.10733	96	6	37	21.7917	7.80946	1	20
ABCC9_rs1873638	412	242	30	435	214	29	0.307969	452	239	27	395	217	32	0.514758	441	217	33	406	239	26	0.219923	847	0.01	0.5	0.114675	0.119603	456	0.01	0.5	0.113947	0.118595	59	0.01	0.48	0.0969492	0.106743	0.552887	847	0	38	21.49	7.86963	456	1	38	20.7522	8.37881	59	0
ABCC9_rs2292772	315	293	76	311	297	70	0.868948	340	298	80	286	292	66	0.357723	317	311	63	309	279	83	0.118404	626	0.01	0.5	0.118419	0.120851	590	0.01	0.5	0.108881	0.117679	146	0.01	0.49	0.112603	0.113472	0.318689	626	0	38	21.3355	7.99075	590	2	38	21.1153	8.22974	146	2
ABCC9_rs2307024	242	344	98	255	304	119	0.0912916	261	343	114	236	305	103	0.988804	237	337	117	260	311	100	0.209254	497	0.01	0.5	0.11503	0.121506	648	0.01	0.49	0.116312	0.119048	217	0.01	0.5	0.102627	0.110876	0.48576	497	3	38	21.4306	8.15152	648	0	38	21.2701	8.06865	217	0
ABCC9_rs3782667	95	341	248	116	306	256	0.13064	113	337	268	98	310	236	0.900417	120	328	243	91	319	261	0.107171	211	0.01	0.48	0.0996209	0.106184	647	0.01	0.5	0.114699	0.118483	504	0.01	0.5	0.118214	0.123649	0.340373	211	0	38	20.3886	8.20224	647	1	38	21.2643	8.10494	504	0
ABCC9_rs4148665	26	268	390	40	249	389	0.160268	38	278	402	28	239	377	0.538152	25	264	402	41	253	377	0.102091	66	0.01	0.48	0.111818	0.117092	517	0.01	0.5	0.120193	0.123759	779	0.01	0.5	0.109487	0.115337	0.515186	66	4	38	21.5152	7.39073	517	0	38	21.4507	8.09225	779	0
ABCC9_rs4148679	489	179	16	510	156	12	0.275233	530	179	9	469	156	19	0.0903748	511	170	10	488	165	18	0.279191	999	0.01	0.5	0.112913	0.117426	335	0.01	0.5	0.117701	0.124007	28	0.01	0.37	0.0921429	0.0987461	0.713607	999	0	38	21.4144	7.92326	335	1	38	20.6627	8.39106	28	0
ABCC9_rs704176	196	360	128	218	322	138	0.160689	219	363	136	195	319	130	0.842811	199	348	144	215	334	122	0.293984	414	0.01	0.5	0.116812	0.123271	682	0.01	0.5	0.116774	0.119527	266	0.01	0.48	0.100789	0.108502	0.327556	414	0	38	21.3237	7.84977	682	1	38	21.4135	8.15969	266	0
ABCC9_rs704191	124	358	202	147	319	212	0.109473	142	357	219	129	320	195	0.994617	147	346	198	124	331	216	0.253157	271	0.01	0.5	0.100443	0.106891	677	0.01	0.49	0.114697	0.118872	414	0.01	0.5	0.120628	0.125204	0.231901	271	0	38	20.7196	7.83787	677	0	38	21.2009	8.27689	414	3
ABCC9_rs829079	158	364	162	163	332	183	0.249694	166	370	182	155	326	163	0.912925	171	356	164	150	340	181	0.321071	321	0.01	0.5	0.101713	0.109244	696	0.01	0.49	0.118003	0.121031	345	0.01	0.5	0.116029	0.121988	0.346735	321	0	38	20.7695	7.92246	696	0	38	21.3046	8.30077	345	4
ABCC9_rs829080	102	355	226	127	325	226	0.133796	119	358	241	110	322	211	0.942825	108	346	237	121	334	215	0.430949	229	0.01	0.49	0.106332	0.114112	680	0.01	0.5	0.117897	0.121127	452	0.01	0.5	0.11104	0.117445	0.731776	229	4	38	21.0393	7.56279	680	0	38	21.4485	8.37559	452	0
ABCC9_rs864360	283	326	75	291	287	100	0.0467536	302	322	94	272	291	81	0.96468	273	323	95	301	290	80	0.126418	574	0.01	0.5	0.115279	0.121779	613	0.01	0.5	0.115726	0.119058	175	0.01	0.48	0.101143	0.106549	0.523423	574	0	38	21.5139	8.21285	613	1	38	21.1338	7.85479	175	0
ACE_rs17230271	128	338	217	123	348	207	0.802837	124	367	227	127	319	197	0.503831	133	356	202	118	330	222	0.288182	251	0.01	0.49	0.113028	0.119541	686	0.01	0.5	0.116603	0.120318	424	0.01	0.49	0.109316	0.115843	0.782548	251	4	38	20.7968	7.85331	686	0	38	21.4606	8.08824	424	0
ACE_rs17230285	1	82	601	3	76	599	0.577313	3	80	635	1	78	565	0.650411	4	87	600	0	71	600	0.0632073	4	0.01	0.08	0.04	0.0294392	158	0.01	0.5	0.122911	0.118097	1200	0.01	0.5	0.112692	0.118902	0.104225	4	4	34	22.5	12.897	158	4	37	21.1203	7.82236	1200	0
ACE_rs17230334	185	349	150	186	330	162	0.616185	188	364	166	183	315	146	0.647071	198	344	149	173	335	163	0.34774	371	0.01	0.5	0.116873	0.122972	679	0.01	0.5	0.115052	0.117247	312	0.01	0.49	0.106827	0.116822	0.357676	371	1	38	21.0162	7.93485	679	0	38	21.4683	8.06894	312	0
ACE_rs17230348	155	347	182	168	325	185	0.540488	172	359	187	151	313	180	0.73655	156	340	195	167	332	172	0.44609	323	0.01	0.49	0.106316	0.115642	672	0.01	0.5	0.115967	0.118504	367	0.01	0.5	0.115913	0.121777	0.333093	323	0	38	20.9536	8.25718	672	0	38	21.4658	8.07521	367	1
ACE_rs17230365		36	648		26	652	0.242121		29	689		33	611	0.363678		35	656		27	644	0.366322						62	0.01	0.49	0.121613	0.12018	1300	0.01	0.5	0.113285	0.118674	0.493373						62	7	35	22.5484	7.51758	1300	0
ACE_rs17236757	135	337	212	140	318	219	0.698157	143	353	222	132	302	209	0.714435	134	323	233	141	332	198	0.238694	275	0.01	0.48	0.106473	0.114329	655	0.01	0.5	0.114183	0.116603	431	0.01	0.5	0.116752	0.123833	0.543186	275	0	38	20.8836	8.35793	655	0	38	21.4611	7.98285	431	1
ADIPOQ_rs182052	96	287	301	82	303	293	0.448492	100	307	311	78	283	283	0.611885	94	287	310	84	303	284	0.398168	178	0.01	0.45	0.108146	0.118094	590	0.01	0.5	0.118051	0.123864	594	0.01	0.49	0.11096	0.113605	0.963098	178	0	38	20.2978	8.24937	590	1	38	21.3203	8.13453	594	0
ADIPOQ_rs266729	63	242	371	54	258	362	0.51338	66	260	387	51	240	346	0.6944	58	248	378	59	252	355	0.771001	117	0.01	0.45	0.0988889	0.111624	500	0.01	0.5	0.1194	0.124326	733	0.01	0.5	0.112292	0.115595	0.621853	117	0	38	20.4274	7.80618	500	0	38	21.356	8.31815	733	0
ADIPOQ_rs3774262	10	132	542	15	129	534	0.601518	13	140	565	12	121	511	0.948655	16	126	549	9	135	527	0.298513	25	0.01	0.48	0.0716	0.0999033	261	0.01	0.49	0.114981	0.11403	1076	0.01	0.5	0.114322	0.120133	0.0733782	25	4	35	17.72	9.85106	261	0	37	21.1303	8.09263	1076	0
ADIPOQ_rs6444175	62	274	347	62	269	347	0.989774	67	290	360	57	253	334	0.827729	58	284	349	66	259	345	0.503737	124	0.01	0.48	0.100726	0.110477	543	0.01	0.5	0.113057	0.115869	694	0.01	0.5	0.116095	0.122008	0.631385	124	0	38	22.4597	8.42219	543	0	38	20.8711	8.21718	694	0
ADIPOQ_rs822387	562	116	6	555	120	3	0.606303	598	117	3	519	119	6	0.272152	569	116	6	548	120	3	0.587647	1117	0.01	0.5	0.112247	0.116534	236	0.01	0.49	0.120254	0.127586	9	0.01	0.48	0.116667	0.152561	0.960478	1117	0	38	21.2363	8.07589	236	0	38	20.9703	8.08802	9	10
ADIPOQ_rs822396	472	189	23	458	191	29	0.642849	508	187	23	422	193	29	0.0926388	475	194	22	455	186	30	0.475851	930	0.01	0.5	0.112441	0.117176	380	0.01	0.49	0.116553	0.122073	52	0.01	0.47	0.114423	0.123024	0.992776	930	0	38	21.1301	8.07175	380	3	38	21.4421	8.217	52	8
ADPRTL2_rs1713411	1	49	634	2	65	611	0.211088	2	62	654	1	52	591	0.908836	2	56	633	1	58	612	0.826893	3	0.07	0.16	0.106667	0.0472582	114	0.01	0.48	0.105789	0.106878	1245	0.01	0.5	0.114402	0.119876	0.698614	3	13	24	20	6.08276	114	4	37	21.1754	8.01905	1245	0
ADPRTL2_rs1713413	270	331	83	288	313	77	0.527239	307	332	79	251	312	81	0.320111	273	337	81	285	307	79	0.498503	558	0.01	0.5	0.107975	0.109613	644	0.01	0.5	0.117143	0.12522	160	0.01	0.49	0.1195	0.12218	0.72136	558	0	38	20.6237	7.98191	644	1	38	21.6661	8.06459	160	0
ADPRTL2_rs1760925	639	45	0	620	57	1	0.198893	665	52	1	594	50	0	0.872186	639	51	1	620	51	0	0.958495	1259	0.01	0.5	0.113908	0.119459	102	0.01	0.48	0.110882	0.110176	1	0.09	0.09	0.09		0.905763	1259	0	38	21.1747	8.10364	102	4	37	21.6569	7.84187	1	13
ADPRTL2_rs2297619	9	145	530	14	141	523	0.568764	14	164	540	9	122	513	0.144321	11	142	538	12	144	515	0.891266	23	0.01	0.41	0.122609	0.134645	286	0.01	0.48	0.112378	0.113663	1053	0.01	0.5	0.113818	0.119792	0.92622	23	6	36	23.0435	8.87529	286	1	38	20.8007	8.1097	1053	0
ADPRTL2_rs3093882	36	286	362	34	262	382	0.4425	34	262	422	36	286	322	0.0051239	29	295	367	41	253	377	0.0767845	70	0.01	0.49	0.119	0.12719	548	0.01	0.5	0.11708	0.126336	744	0.01	0.5	0.110645	0.111985	0.951596	70	4	37	20.7	8.38105	548	0	38	21.8996	8.29633	744	0
ADPRTL2_rs3093907	63	320	301	52	294	332	0.162243	53	318	347	62	296	286	0.188486	54	331	306	61	283	327	0.101534	115	0.01	0.49	0.120783	0.124915	614	0.01	0.5	0.119218	0.127422	633	0.01	0.5	0.106983	0.10817	0.737703	115	0	37	21.2	8.38566	614	1	38	21.7964	8.16286	633	0
ADRB1_rs17875422	641	42	1	619	57	2	0.212287	660	57	1	600	42	2	0.473403	638	52	1	622	47	2	0.786369	1260	0.01	0.5	0.114056	0.118366	99	0.01	0.49	0.107778	0.121332	3	0.01	0.39	0.143333	0.213854	0.661014	1260	0	38	21.231	8.11395	99	6	37	20.6566	7.69331	3	24
ADRB1_rs17875426	52	266	366	54	280	344	0.590666	56	281	381	50	265	329	0.74844	56	265	370	50	281	340	0.411075	106	0.01	0.5	0.130472	0.129919	546	0.01	0.49	0.107106	0.114938	710	0.01	0.5	0.116197	0.119646	0.161431	106	6	38	20.7075	8.5501	546	2	38	20.7582	7.81414	710	0
ADRB1_rs17875428	390	246	48	392	248	38	0.56831	421	252	45	361	242	41	0.618224	392	256	43	390	238	43	0.832962	782	0.01	0.5	0.115396	0.119705	494	0.01	0.5	0.111417	0.118006	86	0.01	0.48	0.110814	0.114668	0.79855	782	0	38	21.0537	7.97321	494	2	38	21.1397	8.1653	86	1
ADRB1_rs17875436	188	334	162	192	324	161	0.922292	205	321	191	175	337	132	0.00798676	191	332	168	189	326	155	0.87998	380	0.01	0.5	0.112263	0.115602	658	0.01	0.5	0.113389	0.121801	323	0.01	0.49	0.11613	0.116337	0.648541	380	2	38	21.2026	8.24995	658	1	38	21.0638	7.99689	323	0
ADRB1_rs3813720	280	328	76	264	327	87	0.557228	309	326	83	235	329	80	0.0466791	287	317	87	257	338	76	0.248573	544	0.01	0.49	0.118346	0.11929	655	0.01	0.5	0.111145	0.118989	163	0.01	0.47	0.10816	0.115792	0.222043	544	0	38	21.4614	8.15698	655	1	38	21.1389	7.94865	163	6
ADRB2_rs1042713	92	315	277	90	333	255	0.495676	86	339	293	96	309	239	0.180457	85	344	262	97	304	270	0.215371	182	0.01	0.5	0.10533	0.110916	648	0.01	0.49	0.112731	0.117847	532	0.01	0.5	0.11765	0.122326	0.647509	182	5	38	21.1099	7.64177	648	0	38	21.6157	8.02019	532	0
ADRB2_rs1432622	149	341	194	127	343	208	0.328656	149	363	206	127	321	196	0.755201	130	362	199	146	322	203	0.223475	276	0.01	0.5	0.118659	0.128954	684	0.01	0.49	0.115161	0.118457	402	0.01	0.5	0.107687	0.111663	0.82335	276	0	38	20.9457	8.42123	684	0	38	21.3129	8.08022	402	1
ADRB3_rs2071493	600	83	1	568	106	4	0.0659195	615	99	4	553	90	1	0.568801	588	103	0	580	86	5	0.0358802	1168	0.01	0.5	0.115163	0.120086	189	0.01	0.5	0.105714	0.11044	5	0.01	0.22	0.064	0.0876356	0.311009	1168	0	38	21.2363	8.10687	189	0	38	20.9524	7.885	5	9
ADRB3_rs4994	597	86	1	566	108	4	0.0943425	612	102	4	551	92	1	0.572117	587	104	0	576	90	5	0.049116	1163	0.01	0.5	0.115228	0.120055	194	0.01	0.5	0.105567	0.110879	5	0.01	0.22	0.064	0.0876356	0.287027	1163	0	38	21.2261	8.1063	194	0	38	21.0206	7.89632	5	9
ADRB3_rs4997	1	82	601	4	106	568	0.0509235	4	99	615	1	89	554	0.568437	0	103	588	5	85	581	0.0298916	5	0.01	0.22	0.064	0.0876356	188	0.01	0.5	0.105	0.110296	1169	0.01	0.5	0.115269	0.12009	0.288694	5	9	35	23.4	11.0589	188	0	38	20.8936	7.86445	1169	0
ADRB3_rs4998	600	83	1	568	106	4	0.0659195	615	99	4	553	90	1	0.568801	588	103	0	580	86	5	0.0358802	1168	0.01	0.5	0.115163	0.120086	189	0.01	0.5	0.105714	0.11044	5	0.01	0.22	0.064	0.0876356	0.311009	1168	0	38	21.2363	8.10687	189	0	38	20.9524	7.885	5	9
ADRB3_rs9694197	597	85	2	560	113	5	0.0404163	608	105	5	549	93	2	0.660178	583	106	2	574	92	5	0.345614	1157	0.01	0.5	0.115307	0.120083	198	0.01	0.5	0.105505	0.11133	7	0.01	0.22	0.0728571	0.0822018	0.331254	1157	0	38	21.2532	8.11161	198	0	38	20.8384	7.89295	7	9
AGER_rs1035798	42	232	410	31	291	356	0.00237816	40	277	401	33	246	365	0.908968	36	285	370	37	238	396	0.0882456	73	0.01	0.45	0.103699	0.11474	523	0.01	0.49	0.107304	0.113143	766	0.01	0.5	0.118956	0.122606	0.334852	73	4	36	21.7534	8.00309	523	0	38	21.2008	7.9242	766	0
AGER_rs204993	303	316	65	285	334	59	0.521752	302	349	67	286	301	57	0.6846	292	335	64	296	315	60	0.790506	588	0.01	0.49	0.114983	0.118719	650	0.01	0.5	0.111754	0.118502	124	0.01	0.49	0.117419	0.120547	0.630821	588	0	38	21.1395	7.91313	650	0	38	21.2123	8.22626	124	4
AGER_rs2269423	74	298	312	55	277	346	0.0704234	67	310	341	62	265	317	0.756461	60	283	348	69	292	310	0.260906	129	0.01	0.45	0.122326	0.119997	575	0.01	0.5	0.115339	0.121008	658	0.01	0.5	0.110502	0.116478	0.454432	129	3	37	21.3178	8.11825	575	0	38	21.1513	8.08942	658	0
AGTR1_rs17230483	24	198	462	24	192	462	0.977775	29	205	484	19	185	440	0.559546	20	207	464	28	183	460	0.284697	48	0.01	0.49	0.127708	0.12343	390	0.01	0.5	0.120564	0.123952	924	0.01	0.5	0.110022	0.116125	0.382885	48	9	38	22.8333	7.79343	390	0	38	21.4513	8.20943	924	0
AGTR1_rs17230574	75	304	305	91	285	302	0.340221	94	295	329	72	294	278	0.201705	89	308	294	77	281	313	0.29932	166	0.01	0.49	0.105843	0.110696	589	0.01	0.5	0.115399	0.121212	607	0.01	0.5	0.114119	0.11848	0.657557	166	1	38	20.5361	8.29943	589	0	38	21.309	8.24268	607	0
AGTR1_rs17230820	498	161	25	470	192	16	0.0660959	519	176	23	449	177	18	0.439638	479	185	27	489	168	14	0.0931389	968	0.01	0.5	0.119597	0.122219	353	0.01	0.48	0.0948159	0.104667	41	0.01	0.45	0.135854	0.132211	0.00209671	968	0	38	21.6188	7.96439	353	1	37	20.0255	8.19901	41	8
AGTR1_rs17230896	17	161	506	14	158	506	0.876149	18	171	529	13	148	483	0.766025	14	169	508	17	150	504	0.558248	31	0.01	0.39	0.135806	0.112273	319	0.01	0.5	0.114232	0.121085	1012	0.01	0.5	0.112806	0.118192	0.222204	31	9	38	23.0645	7.98722	319	0	38	20.953	8.18771	1012	0
AGTR1_rs17230917	25	195	464	20	200	458	0.736809	23	208	487	22	187	435	0.982783	25	203	463	20	192	459	0.74904	45	0.01	0.45	0.124	0.124816	395	0.01	0.5	0.102481	0.113437	922	0.01	0.5	0.11795	0.120409	0.053475	45	9	38	22.0222	8.93789	395	1	37	20.4	8.11479	922	0
AGTR1_rs17231014	381	257	46	368	255	55	0.603812	392	275	51	357	237	50	0.80639	363	274	54	386	238	47	0.182485	749	0.01	0.5	0.116088	0.122388	512	0.01	0.5	0.108984	0.112372	101	0.01	0.47	0.119406	0.122628	0.889235	749	0	38	21.0895	7.9944	512	0	38	21.3008	8.28665	101	6
AGTR1_rs17231147	3	66	615	2	67	609	0.977169	4	68	646	1	65	578	0.507915	1	80	610	4	53	614	0.0240692	5	0.03	0.24	0.09	0.0886002	133	0.01	0.44	0.107519	0.112529	1224	0.01	0.5	0.114428	0.119512	0.989363	5	25	38	29.4	5.17687	133	0	36	20.4436	7.78734	1224	0
AGTR1_rs17231161	10	98	576	7	114	557	0.361887	9	118	591	8	94	542	0.683638	10	114	567	7	98	566	0.490703	17	0.03	0.45	0.157059	0.143908	212	0.01	0.47	0.11033	0.115087	1133	0.01	0.5	0.113636	0.118959	0.276561	17	6	35	21.3529	8.80299	212	6	38	21.3019	8.05864	1133	0
AGTR1_rs17237008	179	334	171	186	345	147	0.35106	198	338	182	167	341	136	0.0706325	203	337	151	162	342	167	0.0753902	365	0.01	0.49	0.105123	0.110644	679	0.01	0.5	0.118881	0.123643	318	0.01	0.48	0.112327	0.116642	0.572819	365	0	38	21.3425	8.26022	679	0	38	21.1767	8.06635	318	3
AGTR1_rs17237078	22	162	500	16	190	472	0.143039	20	174	524	18	178	448	0.343626	25	183	483	13	169	489	0.131765	38	0.01	0.39	0.120526	0.118138	352	0.01	0.48	0.096733	0.107276	972	0.01	0.5	0.119527	0.122149	0.00493873	38	8	38	20.8684	8.93269	352	1	37	20.0085	8.17072	972	0
AGTR1_rs17237113	468	192	24	458	196	24	0.940097	486	203	29	440	185	19	0.562236	466	205	20	460	183	28	0.317803	926	0.01	0.5	0.111739	0.116892	388	0.01	0.5	0.116521	0.122512	48	0.01	0.49	0.127708	0.12343	0.723627	926	0	38	21.1371	8.03543	388	0	38	21.1649	8.22793	48	9
AGTR1_rs17237400	24	179	481	26	184	468	0.873654	25	190	503	25	173	446	0.903525	26	190	475	24	173	474	0.746364	50	0.01	0.41	0.1074	0.104838	363	0.01	0.5	0.110579	0.115906	949	0.01	0.5	0.115174	0.120522	0.98933	50	9	38	22.82	7.35594	363	0	38	21.0138	8.3575	949	0
AGTR1_rs17237498	5	92	587	5	99	574	0.871751	3	110	605	7	81	556	0.140394	5	105	581	5	86	580	0.463114	10	0.03	0.45	0.184	0.167611	191	0.01	0.47	0.111257	0.115291	1161	0.01	0.5	0.113454	0.118724	0.295436	10	9	33	24	7.71722	191	6	38	21.1047	8.0472	1161	0
AGT_rs11568030	3	51	630	0	55	623	0.268283	2	56	660	1	50	593	1	1	47	643	2	59	610	0.379047	3	0.09	0.16	0.13	0.0360555	106	0.01	0.48	0.0951887	0.10441	1253	0.01	0.5	0.115188	0.119879	0.139959	3	12	33	25.3333	11.5902	106	4	38	20.1792	8.55881	1253	0
AGT_rs2004776	33	261	390	38	238	402	0.458958	36	247	435	35	252	357	0.150559	39	252	400	32	247	392	0.780806	71	0.01	0.42	0.112958	0.114996	499	0.01	0.5	0.117034	0.121952	792	0.01	0.5	0.111604	0.117057	0.420087	71	0	35	20.2958	8.75931	499	0	38	21.0441	7.9843	792	1
AGT_rs2067853	81	301	302	80	310	288	0.803732	91	331	296	70	280	294	0.224852	76	309	306	85	302	284	0.579776	161	0.01	0.5	0.114037	0.124043	611	0.01	0.49	0.114354	0.115814	590	0.01	0.5	0.112847	0.120379	0.837805	161	4	38	21.3975	8.33313	611	0	38	21.743	8.02196	590	0
AGT_rs2478543	238	328	118	244	303	131	0.423121	270	325	123	212	306	126	0.168564	231	322	138	251	309	111	0.153715	482	0.01	0.5	0.114087	0.117515	631	0.01	0.5	0.112044	0.11884	249	0.01	0.49	0.116948	0.121072	0.826994	482	1	38	21.7614	8.28188	631	0	38	20.9937	8.00099	249	0
AGT_rs2493137	326	304	54	326	275	77	0.0659084	369	281	68	283	298	63	0.0176676	316	299	76	336	280	55	0.116734	652	0.01	0.5	0.112485	0.11723	579	0.01	0.5	0.11639	0.121195	131	0.01	0.49	0.107481	0.115461	0.729612	652	0	38	21.727	8.17657	579	0	38	20.7599	8.03879	131	4
AGT_rs3789679	1	96	579	4	103	568	0.350741	3	95	616	2	104	531	0.25048	3	108	576	2	91	571	0.573575	5	0.01	0.33	0.086	0.136675	199	0.01	0.48	0.117337	0.12227	1147	0.01	0.5	0.112607	0.117512	0.45995	5	4	26	15.6	8.90505	199	0	38	21.4925	8.38461	1147	0
AGT_rs5050	480	188	14	471	184	23	0.329349	512	182	22	439	190	15	0.202347	478	194	18	473	178	19	0.803237	951	0.01	0.5	0.115089	0.119589	372	0.01	0.49	0.111559	0.116872	37	0.01	0.49	0.097027	0.116544	0.660232	951	0	38	21.6551	8.20493	372	0	38	20.2903	7.82467	37	8
AKR1B1_rs1790998	168	331	185	135	338	205	0.0981427	159	360	199	144	309	191	0.683106	149	351	191	154	318	199	0.454207	303	0.01	0.5	0.106304	0.110586	669	0.01	0.49	0.115411	0.118514	390	0.01	0.49	0.116385	0.125046	0.726522	303	0	38	20.4389	8.40975	669	2	38	21.6024	7.95141	390	0
AKR1B1_rs1791001	28	190	466	15	197	466	0.13512	19	203	496	24	184	436	0.504252	20	204	467	23	183	465	0.586168	43	0.01	0.38	0.109535	0.100592	387	0.01	0.5	0.11584	0.12073	932	0.01	0.5	0.112951	0.118736	0.829617	43	9	36	22.3023	8.08153	387	1	38	20.7106	8.08241	932	0
AKR1B1_rs2259458	64	275	345	73	289	316	0.334125	71	291	356	66	273	305	0.714919	65	294	332	72	270	329	0.576216	137	0.01	0.44	0.109197	0.113397	564	0.01	0.49	0.109273	0.117643	661	0.01	0.5	0.118336	0.120673	0.342729	137	1	38	21.4672	7.49515	564	0	38	21.5248	8.17055	661	0
AKR1B1_rs706206	2	41	641	2	43	633	0.933277	0	43	675	4	41	599	0.111367	1	41	649	3	43	625	0.588425	4	0.02	0.25	0.0925	0.105948	84	0.01	0.45	0.0933333	0.10755	1274	0.01	0.5	0.115071	0.119395	0.0739498	4	23	33	28	4.76095	84	3	38	19.7024	8.62021	1274	0
APOA1_rs17243046	536	138	10	517	148	12	0.655036	553	151	13	500	135	9	0.857486	539	139	12	514	147	10	0.697117	1053	0.01	0.5	0.11378	0.118371	286	0.01	0.49	0.113497	0.119808	22	0.01	0.41	0.0981818	0.113835	0.435579	1053	0	38	20.9478	8.06215	286	3	38	22.1434	8.01339	22	7
APOA1_rs17243074	500	167	17	461	190	27	0.0704479	509	185	24	452	172	20	0.908049	485	177	29	476	180	15	0.119868	961	0.01	0.5	0.117003	0.120603	357	0.01	0.49	0.108319	0.115235	44	0.01	0.39	0.0840909	0.0999376	0.15043	961	0	38	21.2674	8.12636	357	2	37	20.958	7.98143	44	5
APOA4_rs17244645	492	174	18	474	181	23	0.603164	504	193	21	462	162	20	0.778769	489	182	20	477	173	21	0.951431	966	0.01	0.5	0.113178	0.117871	355	0.01	0.49	0.116282	0.121969	41	0.01	0.43	0.102439	0.111597	0.576228	966	0	38	20.9234	8.11206	355	3	38	21.8873	7.909	41	6
APOA4_rs17250988	440	224	20	442	214	22	0.869894	474	222	22	408	216	20	0.568578	448	222	21	434	216	21	1	882	0.01	0.5	0.109048	0.11751	438	0.01	0.5	0.123105	0.121621	42	0.01	0.43	0.112143	0.109579	0.0765226	882	0	38	21.2937	8.12103	438	0	38	20.847	8.0996	42	9
APOA4_rs17251002	290	310	84	278	313	87	0.865314	305	323	90	263	300	81	0.814203	290	313	88	278	310	83	0.94434	568	0.01	0.5	0.110898	0.119118	623	0.01	0.5	0.112889	0.116671	171	0.01	0.49	0.125673	0.124575	0.413675	568	0	38	20.8926	8.18228	623	0	38	21.2825	8.03712	171	4
APOA5_rs10750097	456	203	25	415	232	31	0.107012	456	230	32	415	205	24	0.799525	436	229	26	435	206	30	0.545963	871	0.01	0.5	0.117463	0.119072	435	0.01	0.49	0.108184	0.119031	56	0.01	0.45	0.0971429	0.109107	0.134509	871	0	38	21.1883	8.20381	435	0	38	21.331	8.06345	56	6
APOA5_rs12287066	2	68	614	4	90	584	0.101121	5	75	638	1	83	560	0.126332	4	84	603	2	74	595	0.587937	6	0.03	0.41	0.131667	0.14428	158	0.01	0.48	0.100633	0.113786	1198	0.01	0.5	0.115292	0.119211	0.185512	6	8	30	18.8333	7.16705	158	2	36	20.6203	7.58108	1198	0
APOA5_rs1729411	20	148	516	9	142	527	0.112464	17	160	541	12	130	502	0.510376	16	143	532	13	147	511	0.777423	29	0.01	0.47	0.13069	0.140151	290	0.01	0.5	0.113034	0.118665	1043	0.01	0.5	0.113365	0.118173	0.949285	29	7	35	21.4483	7.27808	290	0	38	20.3759	8.23572	1043	0
APOA5_rs619054	46	234	404	48	239	391	0.867791	45	249	424	49	224	371	0.60077	53	233	405	41	240	390	0.443837	94	0.01	0.44	0.12234	0.123588	473	0.01	0.5	0.114503	0.116651	795	0.01	0.5	0.112138	0.11944	0.570469	94	0	38	21.383	8.53595	473	1	38	21.3214	8.06346	795	0
APOB_rs17240476	151	367	166	174	345	159	0.299129	175	381	162	150	331	163	0.49257	154	363	174	171	349	151	0.285546	325	0.01	0.48	0.120185	0.120488	712	0.01	0.5	0.110365	0.115846	325	0.01	0.5	0.114369	0.123133	0.521456	325	0	38	21.2092	8.0465	712	0	38	21.3778	8.12398	325	0
APOB_rs17240674	6	105	573	9	123	546	0.267565	13	117	588	2	111	531	0.0240021	11	117	563	4	111	556	0.21679	15	0.01	0.41	0.122667	0.133816	228	0.01	0.5	0.10636	0.114439	1119	0.01	0.5	0.115031	0.119407	0.583958	15	9	38	24.2667	8.57294	228	1	36	20.1798	8.0164	1119	0
APOB_rs17240958	404	256	24	424	228	26	0.344244	425	266	27	403	218	23	0.446038	428	243	20	400	241	30	0.264683	828	0.01	0.5	0.113321	0.119743	484	0.01	0.49	0.115888	0.117511	50	0.01	0.47	0.0978	0.114023	0.231971	828	0	38	20.8804	8.14583	484	4	38	21.7335	8.04627	50	6
APOB_rs17246786	74	290	320	59	305	314	0.353525	67	319	332	66	276	302	0.777093	72	304	315	61	291	319	0.635244	133	0.01	0.5	0.121729	0.13313	595	0.01	0.49	0.106807	0.114484	634	0.01	0.5	0.118407	0.119265	0.233445	133	0	36	20.8571	8.76213	595	0	38	21.0723	7.93873	634	0
APOB_rs17246793	14	195	475	12	183	483	0.772726	15	189	514	11	189	444	0.428899	13	199	479	13	179	479	0.674136	26	0.01	0.43	0.126923	0.122793	378	0.01	0.5	0.11209	0.118136	958	0.01	0.5	0.113925	0.118928	0.889849	26	9	37	21.2692	7.40572	378	1	38	21.2487	8.04078	958	0
APOB_rs17246926	192	329	163	191	345	142	0.407971	187	379	152	196	295	153	0.03542	204	340	147	179	334	158	0.406835	383	0.01	0.5	0.110783	0.119512	674	0.01	0.5	0.113175	0.117988	305	0.01	0.49	0.118361	0.119544	0.470018	383	0	38	20.611	8.47031	674	1	38	21.2953	7.71177	305	0
APOB_rs17246933	229	324	131	224	339	115	0.503999	232	373	113	221	290	133	0.016132	224	340	127	229	323	119	0.801618	453	0.01	0.5	0.115916	0.119271	663	0.01	0.49	0.11092	0.116844	246	0.01	0.5	0.116911	0.122921	0.770478	453	0	38	21.3598	8.20295	663	1	38	21.2323	7.84135	246	0
APOB_rs17247072	6	105	573	11	127	540	0.110427	14	120	584	3	112	529	0.0442634	10	124	557	7	108	556	0.53158	17	0.01	0.41	0.111765	0.129481	232	0.01	0.5	0.106509	0.11549	1113	0.01	0.5	0.115184	0.11926	0.460236	17	4	38	22.4118	9.70862	232	1	36	20.0862	7.96374	1113	0
APOB_rs17247305	665	19		650	28		0.183997	697	21		618	26		0.29888	665	26		650	21		0.555184	1315	0.01	0.5	0.113795	0.119228	47	0.01	0.41	0.11	0.104257						0.925291	1315	0	38	21.257	8.07617	47	1	37	19.7447	8.21311
APOC1_rs1064725	624	58	2	602	74	2	0.286542	647	70	1	579	62	3	0.595151	627	63	1	599	69	3	0.430608	1226	0.01	0.5	0.113573	0.118266	132	0.01	0.49	0.116212	0.124272	4	0.03	0.14	0.0575	0.055	0.673547	1226	0	38	21.3018	8.14032	132	1	38	20.4091	7.52498	4	9
APOC2_rs1132899	184	336	164	195	324	158	0.744325	211	341	166	168	319	156	0.410126	190	335	165	189	325	157	0.954056	379	0.01	0.5	0.110079	0.117893	660	0.01	0.49	0.114682	0.118469	322	0.01	0.5	0.116056	0.120519	0.799364	379	1	38	21.6359	8.0234	660	0	38	21.2409	7.95327	322	0
APOC2_rs17257657	465	203	16	478	177	23	0.207402	506	190	22	437	190	17	0.431112	479	194	18	464	186	21	0.839645	943	0.01	0.5	0.113277	0.119832	380	0.01	0.49	0.117868	0.116463	39	0.01	0.48	0.0820513	0.110791	0.0184815	943	0	38	21.2545	8.08638	380	2	38	21.2974	8.05512	39	5
APOC2_rs5167	304	283	97	302	289	87	0.743346	325	295	98	281	277	86	0.764871	299	298	94	307	274	90	0.634237	606	0.01	0.5	0.113185	0.119896	572	0.01	0.49	0.110647	0.115179	184	0.01	0.5	0.12462	0.125454	0.450365	606	1	38	21.4901	8.03458	572	0	38	21.1294	7.98405	184	0
APOC3_rs17251212	1	36	647	0	47	630	0.213498	0	46	671	1	37	606	0.569733	1	43	646	0	40	631	0.954317	1	0.03	0.03	0.03		83	0.01	0.49	0.110241	0.122822	1277	0.01	0.5	0.114017	0.118532	0.704723	1	30	30	30		83	4	38	21.4217	7.73828	1277	0
APOC3_rs17251284	1	69	614	4	67	607	0.479848	4	76	638	1	60	583	0.39879	2	64	625	3	72	596	0.589209	5	0.02	0.42	0.106	0.175585	136	0.01	0.48	0.120441	0.12138	1221	0.01	0.5	0.11294	0.118253	0.519978	5	7	36	21.6	12.0748	136	3	37	21.3162	8.81136	1221	0
APOC3_rs17257810	518	152	14	499	164	15	0.677611	531	168	19	486	148	10	0.368742	519	155	17	498	161	12	0.568053	1017	0.01	0.5	0.113225	0.117567	316	0.01	0.49	0.116076	0.122422	29	0.01	0.42	0.102759	0.121005	0.468254	1017	0	38	20.9803	8.05038	316	3	38	21.8481	8.07086	29	7
APOC4_rs5157	188	333	163	203	320	155	0.603459	218	336	164	173	317	154	0.36291	204	322	165	187	331	153	0.600257	391	0.01	0.5	0.109872	0.118967	653	0.01	0.49	0.114288	0.117883	318	0.01	0.5	0.117044	0.120331	0.649917	391	1	38	21.6931	7.97644	653	0	38	21.1072	7.99813	318	0
APOM_rs3130050	619	64	1	613	63	2	0.972061	656	60	2	576	67	1	0.419965	619	71	1	613	56	2	0.406718	1232	0.01	0.5	0.114683	0.120495	127	0.01	0.37	0.104016	0.1002	3	0.03	0.24	0.103333	0.118462	0.955777	1232	0	38	21.1502	8.04714	127	3	36	21.7087	8.44413	3	16
APOM_rs7029	299	304	81	314	295	69	0.484955	319	323	76	294	276	74	0.707886	319	304	68	294	295	82	0.337982	613	0.01	0.5	0.115139	0.118447	599	0.01	0.5	0.112654	0.120008	150	0.01	0.49	0.111667	0.115238	0.870254	613	0	38	21.7341	8.17353	599	1	38	20.7763	7.97572	150	0
APOM_rs707921	0	39	645	1	53	624	0.117935	1	50	667	0	42	602	0.866728	0	46	645	1	46	624	0.87111	1	0.03	0.03	0.03		92	0.01	0.45	0.107717	0.112456	1269	0.01	0.5	0.114161	0.119206	0.637126	1	21	21	21		92	9	35	21.6413	7.26512	1269	0
ATP1A1_rs1407716	0	76	608	1	75	602	0.965499	1	74	643	0	77	567	0.364174	1	69	621	0	82	589	0.196303	1	0.35	0.35	0.35		151	0.01	0.49	0.113046	0.118665	1210	0.01	0.5	0.113545	0.11862	0.307773	1	26	26	26		151	6	35	21.649	7.56236	1210	0
ATP1A1_rs6428896	639	45	0	643	34	1	0.246611	675	42	1	607	37	0	1	656	34	1	626	45	0	0.165779	1282	0.01	0.5	0.112559	0.117877	79	0.01	0.49	0.128608	0.129355	1	0.35	0.35	0.35		0.25292	1282	0	38	21.1201	8.07998	79	4	35	22.519	8.09536	1	26
ATP1A1_rs757578	566	112	6	549	124	5	0.624946	592	118	8	523	118	3	0.293955	570	113	8	545	123	3	0.23075	1115	0.01	0.5	0.113498	0.120328	236	0.01	0.49	0.111864	0.108514	11	0.01	0.41	0.169091	0.157636	0.504689	1115	0	38	21.3489	8.0445	236	0	37	20.3644	8.24329	11	10
ATP1A1_rs850602	35	250	399	39	262	377	0.577855	43	276	399	31	236	377	0.427432	33	264	394	41	248	382	0.527719	74	0.01	0.44	0.101892	0.106136	512	0.01	0.5	0.110879	0.119614	776	0.01	0.49	0.116624	0.119273	0.296892	74	4	38	20.9595	7.99733	512	0	38	20.8418	8.25762	776	0
ATP1A1_rs850610	336	272	76	310	292	76	0.422984	334	295	89	312	269	63	0.306436	333	286	72	313	278	80	0.647297	646	0.01	0.49	0.114613	0.118019	564	0.01	0.5	0.112819	0.11877	152	0.01	0.48	0.112763	0.122145	0.802561	646	0	38	21.4799	7.99876	564	0	38	20.6933	8.20756	152	4
ATP5A1_rs1800636	129	320	235	141	339	198	0.122803	137	343	238	133	316	195	0.49011	148	332	211	122	327	222	0.2845	270	0.01	0.5	0.118037	0.118511	659	0.01	0.5	0.108589	0.116704	433	0.01	0.49	0.118661	0.121781	0.199034	270	2	38	21.1593	8.04313	659	0	38	21.217	8.14141	433	1
ATP5A1_rs3745004	8	133	543	7	134	537	0.9892	10	140	568	5	127	512	0.586519	6	126	559	9	141	521	0.283482	15	0.01	0.36	0.100667	0.105456	267	0.01	0.49	0.10824	0.114994	1080	0.01	0.5	0.115185	0.11983	0.786641	15	8	33	22.1333	8.4673	267	0	36	20.7753	7.91461	1080	0
ATP5A1_rs7228550	12	157	515	9	152	517	0.792898	14	162	542	7	147	490	0.472239	11	154	526	10	155	506	0.930723	21	0.01	0.41	0.134762	0.125045	309	0.01	0.49	0.11466	0.122433	1032	0.01	0.5	0.112936	0.117523	0.465681	21	10	34	22.9048	7.4223	309	0	38	21.3592	8.08219	1032	0
ATP5A1_rs8085233	589	88	7	580	94	4	0.582328	618	93	7	551	89	4	0.685017	592	93	6	577	89	5	0.985441	1169	0.01	0.5	0.114936	0.11886	182	0.01	0.49	0.108571	0.12018	11	0.01	0.17	0.0627273	0.0540538	0.405424	1169	0	38	21.1634	8.08854	182	1	38	21.4725	8.10476	11	10
ATP5B_rs12229457	297	304	83	285	310	83	0.86928	306	326	86	276	288	80	0.949415	300	305	86	282	309	80	0.779076	582	0.01	0.49	0.116014	0.122601	614	0.01	0.5	0.111645	0.115953	166	0.01	0.49	0.112892	0.115444	0.675839	582	0	38	21.0704	8.07347	614	0	38	21.3225	8.10334	166	1
ATP5B_rs2255074	285	310	89	275	312	91	0.912324	293	331	94	267	291	86	0.942367	286	312	93	274	310	87	0.920418	560	0.01	0.49	0.116661	0.123257	622	0.01	0.5	0.110595	0.114262	180	0.01	0.49	0.114944	0.119783	0.609996	560	0	38	21.0125	8.08463	622	0	38	21.3087	8.12213	180	1
ATP5C1_rs10508335	6	147	531	8	158	512	0.64386	5	165	548	9	140	495	0.409982	6	155	530	8	150	513	0.849611	14	0.03	0.29	0.0685714	0.0796972	305	0.01	0.5	0.109672	0.110935	1043	0.01	0.5	0.115436	0.121251	0.436509	14	9	35	21.7143	8.40722	305	4	38	21.3836	8.12244	1043	0
ATP5C1_rs1244423	96	338	250	72	315	291	0.0262558	83	347	288	85	306	253	0.656284	81	351	259	87	302	282	0.101615	168	0.01	0.49	0.132619	0.130086	653	0.01	0.5	0.113507	0.119165	541	0.01	0.49	0.107967	0.113993	0.168525	168	0	38	21.75	7.79432	653	1	38	20.8576	8.22869	541	0
ATP5C1_rs1244434	125	334	224	99	321	257	0.0630727	105	360	252	119	295	229	0.110315	114	342	234	110	313	247	0.492045	224	0.01	0.49	0.126741	0.1277	655	0.01	0.5	0.11513	0.120027	481	0.01	0.49	0.105821	0.112223	0.28436	224	0	38	21.2321	7.8939	655	1	38	21.029	8.25478	481	0
ATP5C1_rs2778475	69	288	327	48	269	361	0.0483755	48	298	372	69	259	316	0.0293406	60	299	332	57	258	356	0.1609	117	0.01	0.49	0.139744	0.131007	557	0.01	0.5	0.115817	0.119887	688	0.01	0.5	0.107485	0.115021	0.0566985	117	0	37	21.5641	7.66697	557	1	38	21.1454	8.20327	688	0
ATP5C1_rs2802460	377	268	39	409	244	24	0.0508621	423	266	28	363	246	35	0.333943	378	280	32	408	232	31	0.067712	786	0.01	0.5	0.109924	0.116312	512	0.01	0.5	0.114668	0.119634	63	0.01	0.49	0.153492	0.134873	0.0287073	786	0	38	21.2417	8.14034	512	1	38	20.9629	8.04492	63	0
ATP5C1_rs3802595	649	34	1	630	48	0	0.111208	676	42	0	603	40	1	0.687688	651	39	1	628	43	0	0.609392	1279	0.01	0.5	0.113729	0.119054	82	0.01	0.48	0.113537	0.114389	1	0.04	0.04	0.04		0.985015	1279	0	38	21.2486	8.12042	82	6	36	20.5244	7.53465	1	21
ATP5D_rs1076230	182	351	151	183	334	160	0.726815	184	377	157	181	308	154	0.23482	178	366	147	187	319	164	0.132209	365	0.01	0.5	0.109781	0.115483	685	0.01	0.5	0.118584	0.121715	311	0.01	0.48	0.10717	0.115738	0.343905	365	0	38	20.5534	8.0657	685	1	38	21.6701	8.13082	311	0
ATP5D_rs2301759	378	260	46	381	262	34	0.413849	377	291	49	382	231	31	0.0287131	395	258	38	364	264	42	0.544772	759	0.01	0.5	0.113307	0.117611	522	0.01	0.5	0.114751	0.121477	80	0.01	0.47	0.111	0.112403	0.86523	759	0	38	20.9789	7.95383	522	0	38	21.4157	8.31353	80	9
ATP5D_rs8113509	1	51	632	1	53	624	0.919261	2	62	654	0	42	602	0.11645	1	55	635	1	49	621	0.841798	2	0.03	0.2	0.115	0.120208	104	0.01	0.5	0.109904	0.121444	1256	0.01	0.5	0.113973	0.118572	0.859168	2	23	26	24.5	2.12132	104	3	37	21.0096	7.85487	1256	0
ATP5E_rs151352	76	323	285	82	299	297	0.50074	91	316	311	67	306	271	0.280057	77	305	309	81	317	273	0.321222	158	0.01	0.48	0.125	0.127193	622	0.01	0.5	0.116559	0.119535	582	0.01	0.49	0.107491	0.115262	0.144396	158	2	36	20.7215	8.34898	622	0	38	21.0965	8.1197	582	2
ATP5E_rs151358	26	255	403	37	228	413	0.174209	35	245	438	28	238	378	0.529363	33	259	399	30	224	417	0.247004	63	0.01	0.44	0.0942857	0.106887	483	0.01	0.49	0.112899	0.114686	816	0.01	0.5	0.115613	0.121869	0.338773	63	4	38	21.3651	8.93218	483	0	38	21.4306	7.9798	816	0
ATP5E_rs6070698	2	73	609	1	84	593	0.51274	1	89	628	2	68	574	0.453333	3	75	613	0	82	589	0.204344	3	0.12	0.3	0.186667	0.0986577	157	0.01	0.5	0.11293	0.131262	1202	0.01	0.5	0.113577	0.117056	0.167882	3	18	32	26.3333	7.37111	157	5	36	21.1019	7.60329	1202	0
ATP5F1_rs10489794	353	278	53	371	241	66	0.106403	380	271	67	344	248	52	0.718608	362	266	63	362	253	56	0.804682	724	0.01	0.5	0.109365	0.117389	519	0.01	0.5	0.11869	0.120607	119	0.01	0.48	0.117899	0.118356	0.340589	724	0	38	20.9102	8.2073	519	0	38	21.738	7.90342	119	1
ATP5F1_rs12047479	80	313	291	85	266	327	0.0490408	90	300	328	75	279	290	0.812135	85	292	314	80	287	304	0.972907	165	0.01	0.48	0.11703	0.120067	579	0.01	0.5	0.116252	0.119456	618	0.01	0.5	0.11034	0.117751	0.563616	165	1	38	20.6727	7.95733	579	0	38	21.7029	7.84373	618	0
ATP5F1_rs1264897	123	336	225	125	311	242	0.453105	134	340	244	114	307	223	0.897007	127	327	237	121	320	230	0.983872	248	0.01	0.48	0.117742	0.123014	647	0.01	0.5	0.113586	0.117244	467	0.01	0.5	0.111606	0.118609	0.923212	248	1	38	20.7621	7.96728	647	0	38	21.4606	7.88233	467	0
ATP5F1_rs1264901	3	88	593	4	105	569	0.328386	4	102	612	3	91	550	1	3	97	591	4	96	571	0.915552	7	0.01	0.19	0.0657143	0.0626783	193	0.01	0.48	0.113161	0.122767	1162	0.01	0.5	0.114036	0.118292	0.457194	7	15	37	25.2857	8.78852	193	2	36	19.9896	7.80357	1162	0
ATP5G1_rs1800632	45	289	350	48	244	386	0.0588332	49	265	404	44	268	332	0.19006	51	268	372	42	265	364	0.719136	93	0.01	0.48	0.0972043	0.108581	533	0.01	0.5	0.114578	0.119444	736	0.01	0.5	0.115082	0.119396	0.635408	93	0	37	20.3656	7.9684	533	0	38	21.2739	7.94081	736	0
ATP5G1_rs318095	159	361	164	164	313	201	0.0268864	171	352	195	152	322	170	0.931205	162	353	176	161	321	189	0.431781	323	0.01	0.48	0.109071	0.119449	674	0.01	0.5	0.119407	0.12302	365	0.01	0.5	0.107123	0.109387	0.217627	323	0	38	20.7833	8.00249	674	0	38	21.3116	8.17605	365	4
ATP5G2_rs3809156	170	325	189	150	318	210	0.297493	177	334	207	143	309	192	0.569138	174	316	201	146	327	198	0.306021	320	0.01	0.49	0.121594	0.120035	643	0.01	0.5	0.112862	0.120462	399	0.01	0.49	0.108596	0.114703	0.193995	320	0	38	21.0312	7.99837	643	0	38	21.3748	8.19417	399	1
ATP5G2_rs6580958	186	321	177	167	316	194	0.40178	198	324	196	155	313	175	0.288804	189	312	189	164	325	182	0.385608	353	0.01	0.49	0.121615	0.121744	637	0.01	0.5	0.116217	0.121315	371	0.01	0.49	0.101941	0.1105	0.106985	353	0	38	20.8924	8.04037	637	0	38	21.3893	8.17934	371	1
ATP5G2_rs7963016	53	286	345	66	276	336	0.434355	70	290	358	49	272	323	0.356411	62	275	354	57	287	327	0.535057	119	0.01	0.49	0.0932773	0.107191	562	0.01	0.5	0.112438	0.117251	681	0.01	0.49	0.118238	0.121551	0.129519	119	1	38	21.3613	7.89414	562	0	38	21.5979	8.28085	681	0
ATP5G2_rs876252	202	336	146	186	319	173	0.187554	217	335	166	171	320	153	0.313297	202	324	165	186	331	154	0.665953	388	0.01	0.49	0.120284	0.120418	655	0.01	0.5	0.113252	0.11867	319	0.01	0.49	0.106458	0.116612	0.176796	388	0	38	21.0412	7.98243	655	0	38	21.2382	8.21899	319	1
ATP5G3_rs1004723	0	42	642	1	38	639	0.687916	0	41	677	1	39	604	0.684311	1	50	640	0	30	641	0.0374755	1	0.01	0.01	0.01		80	0.01	0.42	0.1045	0.10844	1281	0.01	0.5	0.114317	0.119349	0.213492	1	21	21	21		80	4	37	20.4625	8.29357	1281	0
ATP5G3_rs10497435	624	59	1	621	56	1	0.92281	655	63	0	590	52	2	0.362116	631	58	2	614	57	0	0.620921	1245	0.01	0.5	0.111695	0.117338	115	0.01	0.5	0.136	0.131801	2	0.02	0.09	0.055	0.0494975	0.142139	1245	0	38	21.1454	8.11308	115	5	38	21.8348	7.82252	2	21
ATP5G3_rs2288960	17	171	496	9	155	514	0.176514	17	168	533	9	158	477	0.401538	17	165	509	9	161	501	0.329238	26	0.01	0.39	0.123077	0.114395	326	0.01	0.5	0.118896	0.122346	1010	0.01	0.49	0.111733	0.117678	0.597001	26	8	36	20.2308	8.21368	326	0	38	21.8006	7.84936	1010	0
ATP5G3_rs268230	454	210	20	487	169	22	0.0579337	496	199	23	445	180	19	0.964407	466	196	29	475	183	13	0.0408723	941	0.01	0.49	0.111977	0.118358	379	0.01	0.5	0.118734	0.120466	42	0.01	0.41	0.105714	0.111621	0.681974	941	0	38	21.0521	8.1399	379	0	38	21.6992	7.96383	42	7
ATP5H_rs4435292	63	288	333	69	289	320	0.77935	66	307	345	66	270	308	0.799908	69	258	364	63	319	289	0.000534463	132	0.01	0.48	0.108788	0.123177	577	0.01	0.5	0.114887	0.121958	653	0.01	0.48	0.113568	0.114987	0.525255	132	0	38	21.3788	8.12266	577	0	38	21.1594	8.17106	653	0
ATP5H_rs9660	506	162	16	508	154	16	0.909913	534	170	14	480	146	18	0.56578	509	162	20	505	154	12	0.387053	1014	0.01	0.5	0.116124	0.123525	316	0.01	0.45	0.10712	0.103444	32	0.03	0.38	0.100312	0.102689	0.965679	1014	0	38	21.0927	8.18838	316	2	36	21.5285	7.89147	32	12
ATP5I_rs13104878	1	40	643	1	31	646	0.664679	0	44	674	2	27	615	0.074714	1	33	657	1	38	632	0.733685	2	0.03	0.16	0.095	0.0919239	71	0.01	0.47	0.116197	0.121753	1289	0.01	0.5	0.113553	0.11865	0.974688	2	15	19	17	2.82843	71	8	34	19.7183	6.99833	1289	0
ATP5J2_rs1980307	482	185	17	495	168	15	0.590701	507	199	12	470	154	20	0.0753961	498	178	15	479	175	17	0.893893	977	0.01	0.5	0.114053	0.11909	353	0.01	0.49	0.113569	0.119077	32	0.01	0.44	0.102813	0.105134	0.986969	977	0	38	21.1924	8.01202	353	0	38	21.289	8.29371	32	4
ATP5J2_rs2293256	0	47	637	1	49	628	0.791719	1	48	669	0	48	596	0.670218	1	53	637	0	43	628	0.397576	1	0.03	0.03	0.03		96	0.01	0.49	0.112917	0.125639	1265	0.01	0.5	0.113787	0.118245	0.53596	1	4	4	4		96	0	36	19.9688	8.81082	1265	0
ATP5J_rs11909995	16	187	481	20	186	472	0.775829	21	197	500	15	176	453	0.806326	17	185	489	19	188	464	0.77522	36	0.01	0.41	0.0858333	0.109893	373	0.01	0.49	0.11866	0.12225	953	0.01	0.5	0.11276	0.117571	0.338642	36	10	38	21.4722	8.41592	373	0	38	21.1662	8.33984	953	0
ATP5J_rs2829887	132	344	208	123	345	210	0.867336	126	365	227	129	324	191	0.459739	137	350	204	118	339	214	0.46446	255	0.01	0.49	0.10549	0.113836	689	0.01	0.5	0.117126	0.11877	418	0.01	0.49	0.112943	0.121516	0.479849	255	4	38	21.1216	7.9172	689	0	38	21.2642	8.20928	418	2
ATP5J_rs8133991	485	190	9	498	169	11	0.469559	513	192	13	470	167	7	0.509725	501	180	10	482	179	10	0.965518	983	0.01	0.5	0.113764	0.117884	359	0.01	0.5	0.114178	0.120728	20	0.01	0.44	0.0995	0.127959	0.361884	983	0	38	21.2319	8.18555	359	0	38	21.2312	7.77724	20	2
ATP5O_rs12482697	551	125	8	568	107	3	0.154004	586	127	5	533	105	6	0.700692	568	119	4	551	113	7	0.648676	1119	0.01	0.5	0.112029	0.118379	232	0.01	0.49	0.119914	0.119729	11	0.01	0.33	0.148182	0.132576	0.414869	1119	0	38	21.1653	8.06993	232	0	38	21.375	8.1746	11	8
ATP5O_rs2040113	166	343	175	150	332	196	0.34079	161	365	192	155	310	179	0.596998	175	324	192	141	351	179	0.0876514	316	0.01	0.48	0.114335	0.116155	675	0.01	0.5	0.111541	0.116526	371	0.01	0.49	0.116954	0.124885	0.968424	316	0	38	21.712	8.02354	675	0	38	21.1822	8.04868	371	1
ATP5O_rs2834301	359	285	40	367	266	45	0.607608	380	295	43	346	256	42	0.84427	383	260	48	343	291	37	0.0803046	726	0.01	0.49	0.109146	0.114355	551	0.01	0.5	0.118984	0.122402	85	0.01	0.47	0.117765	0.130324	0.54407	726	0	38	21.3044	8.21737	551	0	38	21.2577	7.9039	85	6
ATP5O_rs3761353	418	236	30	389	245	44	0.148856	425	253	40	382	228	34	0.98263	407	247	37	400	234	37	0.957218	807	0.01	0.5	0.117361	0.120576	481	0.01	0.49	0.107588	0.114557	74	0.01	0.48	0.112838	0.124609	0.695484	807	0	38	21.2268	7.91514	481	0	38	21.0748	8.33783	74	1
ATP5O_rs4302292	2	114	568	4	92	582	0.189238	4	107	607	2	99	543	0.827408	2	97	592	4	109	558	0.385244	6	0.03	0.34	0.101667	0.120568	206	0.01	0.5	0.124029	0.123513	1150	0.01	0.49	0.11187	0.117831	0.542952	6	12	35	26	8.29458	206	4	38	21.0825	8.30915	1150	0
ATP5O_rs762188	346	268	70	324	292	62	0.329507	353	300	65	317	260	67	0.665227	327	287	77	343	273	55	0.12767	670	0.01	0.5	0.120403	0.12536	560	0.01	0.49	0.105143	0.109035	132	0.01	0.48	0.115606	0.12197	0.437401	670	1	38	21.0403	8.19274	560	0	38	21.2304	8.03428	132	3
ATP5S_rs10133342	11	166	507	15	166	497	0.712465	14	184	520	12	148	484	0.508876	16	165	510	10	167	494	0.510019	26	0.01	0.36	0.115	0.113075	332	0.01	0.5	0.119307	0.126636	1004	0.01	0.49	0.111763	0.116177	0.927082	26	4	38	19	7.89937	332	0	38	21.9608	8.19854	1004	0
ATP5S_rs2275592	240	325	119	224	319	134	0.481319	253	322	143	211	322	110	0.137426	237	326	127	227	318	126	0.976013	464	0.01	0.49	0.114634	0.117084	644	0.01	0.49	0.105637	0.111332	253	0.01	0.5	0.132648	0.136895	0.232838	464	0	38	20.8987	7.90498	644	3	38	21.2873	7.93322	253	0
ATP5S_rs9323183	2	72	610	3	97	578	0.108693	2	82	634	3	87	554	0.433181	2	78	611	3	91	577	0.373916	5	0.01	0.15	0.05	0.0565685	169	0.01	0.5	0.106746	0.117375	1188	0.01	0.5	0.114916	0.119046	0.13185	5	11	28	21.6	7.4364	169	2	38	21.1361	8.60781	1188	0
ATPAF1_rs2181411		31	653		24	654	0.409355		25	693		30	614	0.274339		22	669		33	638	0.129394						55	0.01	0.39	0.126545	0.110105	1307	0.01	0.5	0.113122	0.119068	0.113674						55	8	36	23.5455	8.00189	1307	0
ATPAF1_rs620431	57	282	344	45	263	370	0.221399	56	288	373	46	257	341	0.877659	57	272	361	45	273	353	0.539348	102	0.01	0.5	0.11049	0.115222	545	0.01	0.49	0.109339	0.11813	714	0.01	0.5	0.117297	0.11972	0.241648	102	5	38	21.402	8.66684	545	0	38	21.022	8.22721	714	0
ATPAF1_rs744096	354	274	56	373	261	44	0.329814	379	283	56	348	252	44	0.771034	370	265	56	357	270	44	0.49329	727	0.01	0.5	0.116437	0.1193	535	0.01	0.49	0.109944	0.118514	100	0.01	0.5	0.1134	0.116057	0.296176	727	0	38	21.3122	7.8887	535	0	38	21.028	8.2249	100	5
ATPAF2_rs2955377	57	286	341	80	305	293	0.0176963	73	317	328	64	274	306	0.797387	67	297	327	70	294	307	0.811157	137	0.01	0.47	0.112482	0.114666	591	0.01	0.49	0.117919	0.124068	634	0.01	0.5	0.109953	0.11444	0.961661	137	0	38	21.1825	8.14503	591	1	38	21.0237	7.97301	634	0
ATPIF1_rs526050	342	292	50	330	292	56	0.767058	376	289	53	296	295	53	0.0614923	352	287	52	320	297	54	0.486883	672	0.01	0.5	0.115298	0.119643	584	0.01	0.5	0.111935	0.117265	106	0.01	0.48	0.11283	0.121661	0.760772	672	0	38	21.6369	8.06821	584	0	38	20.899	8.14355	106	3
ATPIF1_rs8559	289	323	72	280	314	84	0.566841	317	320	81	252	317	75	0.159659	297	313	81	272	324	75	0.542527	569	0.01	0.5	0.114868	0.119602	637	0.01	0.5	0.112308	0.116812	156	0.01	0.48	0.114808	0.123761	0.787864	569	0	38	21.6872	8.02925	637	0	38	20.8116	8.1924	156	3
BDKRB1_rs12431885	9	39	631	6	50	617	0.340707	6	51	655	9	38	593	0.420556	7	43	637	8	46	611	0.851022	15	0.03	0.5	0.156667	0.132755	89	0.01	0.43	0.10618	0.113092	1248	0.01	0.5	0.113133	0.118268	0.110573	15	9	34	20.1333	8.02555	89	5	37	21.0562	8.32351	1248	0
BDKRB1_rs2069613	432	223	29	426	224	28	0.985142	459	234	25	399	213	32	0.36248	438	221	32	420	226	25	0.611988	858	0.01	0.5	0.110816	0.117255	447	0.01	0.48	0.115906	0.120453	57	0.01	0.49	0.138947	0.125381	0.114636	858	0	38	21.0233	8.03969	447	0	38	21.4362	8.12872	57	2
BDKRB1_rs2071084	18	178	488	15	149	514	0.177719	18	175	525	15	152	477	0.924552	19	171	501	14	156	501	0.554435	33	0.01	0.42	0.0915152	0.0993768	327	0.01	0.47	0.115138	0.11707	1002	0.01	0.5	0.113912	0.119851	0.458929	33	3	38	20.7576	9.55259	327	0	38	21.6422	8.0921	1002	0
BDKRB1_rs4905475	6	121	557	8	101	569	0.341657	6	116	596	8	106	530	0.771474	10	115	566	4	107	560	0.292064	14	0.03	0.3	0.0871429	0.0867737	222	0.01	0.48	0.108514	0.118318	1126	0.01	0.5	0.115009	0.119146	0.653358	14	13	30	20.4286	5.87975	222	4	38	20.7523	7.68008	1126	0
BDKRB1_rs4905476	147	370	167	155	345	178	0.495875	167	366	185	135	349	160	0.454748	156	363	172	146	352	173	0.901838	302	0.01	0.5	0.110828	0.116899	715	0.01	0.5	0.114881	0.11883	345	0.01	0.49	0.113623	0.120329	0.894538	302	2	38	20.755	8.0579	715	0	38	21.2448	8.22037	345	1
BDKRB2_rs1046248	8	121	555	6	128	544	0.743585	6	136	576	8	113	523	0.607404	5	135	551	9	114	548	0.280739	14	0.01	0.47	0.107143	0.134875	249	0.01	0.5	0.117349	0.127704	1099	0.01	0.5	0.112912	0.116468	0.785138	14	4	33	20.2857	9.70669	249	6	37	21.0884	7.6927	1099	0
BDKRB2_rs11629183	5	109	570	6	100	572	0.806725	6	113	599	5	96	543	0.930951	6	99	586	5	110	556	0.549801	11	0.03	0.41	0.141818	0.149253	209	0.01	0.5	0.123062	0.122522	1142	0.01	0.5	0.111673	0.117685	0.233353	11	14	33	22	5.47723	209	3	38	22.2536	8.20986	1142	0
BDKRB2_rs11847625	84	316	284	99	305	274	0.459446	96	335	287	87	286	271	0.695364	88	316	287	95	305	271	0.727561	183	0.01	0.48	0.111694	0.121189	621	0.01	0.5	0.122174	0.124497	558	0.01	0.49	0.104839	0.110554	0.145105	183	4	38	21.5574	8.38862	621	0	38	20.8873	8.11789	558	1
BDKRB2_rs2069575	35	252	397	39	243	396	0.836785	33	264	421	41	231	372	0.359135	40	244	407	34	251	386	0.653249	74	0.01	0.49	0.13027	0.124074	495	0.01	0.5	0.119232	0.122926	793	0.01	0.5	0.108638	0.115335	0.139208	74	2	36	21.5135	8.2963	495	0	38	21.5879	8.18312	793	0
BDKRB2_rs2069579	7	10	667	16	21	640	0.0174839	10	19	688	13	12	619	0.441816	13	19	658	10	12	649	0.430295	23	0.01	0.48	0.0895652	0.101689	31	0.01	0.45	0.110968	0.127576	1307	0.01	0.5	0.114216	0.118835	0.732428	23	6	29	19.2609	6.39046	31	5	35	19.9355	8.49288	1307	0
BDKRB2_rs3809418	1	37	646	0	40	638	0.725859	1	42	675	0	35	609	0.902169	1	35	655	0	42	629	0.35039	1	0.03	0.03	0.03		77	0.01	0.5	0.136753	0.136338	1284	0.01	0.5	0.112344	0.117511	0.25158	1	13	13	13		77	3	38	21.6494	8.48182	1284	0
BDKRB2_rs4900312	27	207	450	37	215	426	0.313197	33	222	463	31	200	413	0.976186	28	224	439	36	198	437	0.315952	64	0.01	0.49	0.0945312	0.118482	422	0.01	0.49	0.114313	0.112511	876	0.01	0.5	0.114749	0.121614	0.192913	64	1	37	19.8906	8.49298	422	0	38	21.6777	8.10298	876	0
BDKRB2_rs4905470	18	190	476	18	178	482	0.832478	16	196	506	20	172	452	0.603408	16	200	475	20	168	483	0.222985	36	0.01	0.47	0.111111	0.129345	368	0.01	0.5	0.115978	0.123723	958	0.01	0.49	0.112871	0.116432	0.933019	36	4	37	20.0556	8.2113	368	2	36	21.3125	7.7893	958	0
BDKRB2_rs4905474	36	212	436	30	220	428	0.692174	29	231	458	37	201	406	0.34124	30	231	430	36	201	434	0.309672	66	0.01	0.5	0.114394	0.130232	432	0.01	0.5	0.119282	0.124544	864	0.01	0.49	0.110799	0.114788	0.517059	66	4	37	21.0758	8.38003	432	1	38	21.0926	7.86639	864	0
BDKRB2_rs945032	34	190	460	20	209	449	0.0991921	36	207	475	18	192	434	0.110653	33	206	452	21	193	457	0.242738	54	0.01	0.49	0.147963	0.149835	399	0.01	0.5	0.114937	0.121799	909	0.01	0.5	0.111067	0.115032	0.71744	54	0	36	23.1111	7.9043	399	0	38	20.8496	8.14704	909	0
BDKRB2_rs945039	38	243	403	46	248	384	0.53301	43	254	421	41	237	366	0.793819	36	249	406	48	242	381	0.311976	84	0.01	0.45	0.0897619	0.110005	491	0.01	0.48	0.109328	0.110639	787	0.01	0.5	0.11892	0.124065	0.0631437	84	1	36	21.2024	8.30848	491	0	38	20.8289	7.81569	787	0
BMP7_rs162315	40	261	383	40	255	383	0.983491	41	265	412	39	251	354	0.6697	41	271	379	39	245	387	0.55823	80	0.01	0.49	0.12175	0.133063	516	0.01	0.5	0.107713	0.11418	766	0.01	0.5	0.116828	0.120107	0.497982	80	3	35	21.2625	8.00592	516	0	38	21.4612	7.9891	766	1
BMP7_rs162317	120	310	254	115	331	232	0.411315	130	330	258	105	311	228	0.589878	116	322	253	119	319	233	0.741662	235	0.01	0.48	0.113277	0.118862	641	0.01	0.5	0.111654	0.115522	486	0.01	0.5	0.116502	0.122903	0.896977	235	4	38	21.1362	8.11026	641	0	38	20.986	8.09252	486	0
BMP7_rs162321	530	144	10	509	157	12	0.560773	550	160	8	489	141	14	0.311197	519	165	7	520	136	15	0.0656257	1039	0.01	0.5	0.115833	0.119141	301	0.01	0.49	0.103522	0.11377	22	0.01	0.49	0.15	0.153964	0.15565	1039	0	38	21.2089	8.07931	301	0	36	21.1429	8.12134	22	9
BMP7_rs2208405	637	47		625	53		0.533935	663	55		599	45		0.677847	649	42		613	58		0.0773561	1262	0.01	0.5	0.112322	0.117039	100	0.01	0.47	0.1306	0.137634						0.398343	1262	0	38	21.1379	8.04054	100	4	37	22.05	8.59337
BMP7_rs3787380	239	327	118	255	326	96	0.254889	258	336	124	236	317	90	0.246877	259	328	104	235	325	110	0.599947	494	0.01	0.5	0.114109	0.12194	653	0.01	0.49	0.114181	0.117873	214	0.01	0.49	0.111449	0.114282	0.767204	494	0	38	21.5061	8.04796	653	0	38	20.8101	8.12635	214	0
BMP7_rs3787383	632	52	0	618	56	4	0.137641	651	64	3	599	44	1	0.246426	634	56	1	616	52	3	0.624939	1250	0.01	0.5	0.113016	0.118294	108	0.01	0.48	0.122593	0.125246	4	0.03	0.12	0.075	0.0519615	0.55076	1250	0	38	21.1728	8.10483	108	4	38	21.6389	7.95132	4	13
BMP7_rs4811822	174	346	164	173	351	154	0.851746	188	367	163	159	330	155	0.750503	173	361	157	174	336	161	0.72729	347	0.01	0.5	0.114957	0.121192	697	0.01	0.5	0.111937	0.115812	318	0.01	0.49	0.116038	0.122516	0.997119	347	0	36	20.8213	8.23901	697	0	38	21.2425	8.11077	318	2
BMP7_rs4811832	165	328	191	136	374	168	0.0261165	161	360	197	140	342	162	0.514454	152	364	175	149	338	184	0.637639	301	0.01	0.49	0.119568	0.123029	702	0.01	0.5	0.111752	0.1191	359	0.01	0.45	0.112451	0.114356	0.5356	301	2	38	21.6113	7.77893	702	0	38	21.1168	8.28869	359	1
BMP7_rs6014947	164	330	190	169	329	180	0.853168	184	332	202	149	327	168	0.246468	180	333	178	153	326	192	0.287095	333	0.01	0.5	0.113784	0.119336	659	0.01	0.48	0.114006	0.119922	370	0.01	0.49	0.112946	0.116271	0.991678	333	0	38	21.7838	7.76237	659	0	38	20.8725	8.16968	370	0
BMP7_rs6025468	444	211	29	435	221	22	0.530927	466	220	32	413	212	19	0.269903	457	205	29	422	227	22	0.199982	879	0.01	0.5	0.112981	0.119026	432	0.01	0.5	0.113125	0.116435	51	0.01	0.49	0.13	0.132936	0.750722	879	0	38	21.1729	8.09058	432	3	38	21.3194	8.09714	51	2
BMP7_rs6123674	244	318	122	234	330	114	0.707808	249	338	131	229	310	105	0.638662	255	316	120	223	332	116	0.318262	478	0.01	0.5	0.115397	0.120262	648	0.01	0.5	0.111682	0.116535	236	0.01	0.49	0.115593	0.121855	0.928991	478	0	38	21.5732	7.84265	648	0	38	20.5864	8.16817	236	0
BMP7_rs6127972	119	315	250	116	331	231	0.560258	127	332	259	108	314	222	0.649001	118	325	248	117	321	233	0.910864	235	0.01	0.49	0.113362	0.120683	646	0.01	0.5	0.11305	0.11697	481	0.01	0.5	0.114636	0.120294	0.974202	235	4	38	21.1745	8.19158	646	0	38	21.0604	7.96257	481	0
BMP7_rs6127983	294	301	89	269	326	83	0.322247	300	327	91	263	300	81	0.924561	291	311	89	272	316	83	0.74681	563	0.01	0.5	0.114352	0.118048	627	0.01	0.5	0.109458	0.116756	172	0.01	0.49	0.126744	0.127357	0.249968	563	0	38	21.1261	7.92716	627	0	38	21.1563	8.35367	172	2
BMP7_rs6127985	25	159	500	16	200	462	0.0169608	20	186	512	21	173	450	0.794024	18	191	482	23	168	480	0.411171	41	0.01	0.49	0.143171	0.134712	359	0.01	0.49	0.106407	0.118268	962	0.01	0.5	0.115114	0.118038	0.0473343	41	9	35	22.6585	7.47198	359	0	38	21.1114	8.31663	962	0
C10orf110_rs10508204	188	335	161	177	340	161	0.842674	202	347	169	163	328	153	0.472162	173	353	165	192	322	157	0.314403	365	0.01	0.49	0.108685	0.113023	675	0.01	0.5	0.115763	0.120605	322	0.01	0.5	0.114907	0.121179	0.970277	365	2	38	21.4082	8.1837	675	0	38	21.2444	8.06508	322	0
C10orf110_rs10508206	412	230	42	418	226	34	0.640673	445	237	36	385	219	40	0.539004	405	240	46	425	216	30	0.0925082	830	0.01	0.5	0.112169	0.116573	456	0.01	0.5	0.112303	0.119481	76	0.01	0.48	0.138158	0.135171	0.35805	830	0	38	21.2518	8.20959	456	0	38	21.2719	7.78958	76	4
C10orf110_rs10751789	46	277	361	69	263	346	0.0727993	60	287	371	55	253	336	0.968596	59	271	361	56	269	346	0.948365	115	0.01	0.49	0.117478	0.122309	540	0.01	0.5	0.112833	0.11709	707	0.01	0.49	0.113678	0.119503	0.949124	115	0	38	21.7913	8.50232	540	0	38	21.2	7.86722	707	0
C10orf110_rs12359250	409	240	35	424	223	31	0.570481	457	227	34	376	236	32	0.12826	418	236	37	415	227	29	0.655818	833	0.01	0.5	0.110516	0.115091	463	0.01	0.5	0.117775	0.123255	66	0.01	0.48	0.124545	0.131057	0.697657	833	0	38	21.2689	8.10417	463	0	38	21.1641	8.00264	66	4
C10orf110_rs3750729	220	336	128	244	309	125	0.301195	239	339	140	225	306	113	0.613007	242	330	119	222	315	134	0.407378	464	0.01	0.5	0.116078	0.122964	645	0.01	0.5	0.114233	0.117932	253	0.01	0.49	0.107787	0.112873	0.948798	464	0	38	21.25	7.96632	645	0	38	21.0899	8.15978	253	2
C10orf110_rs3793778	565	113	6	539	131	8	0.342764	584	130	4	520	114	10	0.210253	554	132	5	550	112	9	0.298373	1104	0.01	0.5	0.113922	0.118266	244	0.01	0.49	0.112254	0.120838	14	0.01	0.37	0.117857	0.124973	0.72413	1104	0	38	21.2219	8.0574	244	0	38	21.082	8.1079	14	4
C10orf110_rs4880757	79	292	313	98	297	283	0.171472	89	318	311	88	271	285	0.646888	84	303	304	93	286	292	0.641865	177	0.01	0.49	0.120169	0.123231	589	0.01	0.5	0.108693	0.115413	596	0.01	0.49	0.116644	0.120554	0.251729	177	0	38	21.8814	8.20563	589	0	38	20.8693	7.97455	596	0
C10orf110_rs7075141	311	294	79	304	293	81	0.963671	329	318	71	286	269	89	0.0782785	302	291	98	313	296	62	0.01769	615	0.01	0.5	0.110634	0.113531	587	0.01	0.5	0.116031	0.123327	160	0.01	0.48	0.116625	0.121375	0.984244	615	0	38	21.3057	8.13151	587	0	38	21.2521	7.97187	160	0
C1orf125_rs10494516	311	301	72	342	263	73	0.133361	327	305	86	326	259	59	0.093579	325	298	68	328	266	77	0.353281	653	0.01	0.5	0.111914	0.115563	564	0.01	0.49	0.114078	0.119552	145	0.01	0.49	0.119931	0.129575	0.996827	653	0	38	20.9035	8.03357	564	2	38	21.5355	8.11773	145	2
C1orf125_rs963062	3	81	600	2	81	595	1	4	80	634	1	82	561	0.34601	4	92	595	1	70	600	0.119482	5	0.03	0.44	0.168	0.169765	162	0.01	0.48	0.115432	0.120491	1195	0.01	0.5	0.113197	0.118305	0.717842	5	14	27	20.4	5.59464	162	5	37	20.6914	7.79575	1195	0
C20orf44_rs10485509	650	34		655	23		0.175784	688	30		617	27		1	661	30		644	27		0.788278	1305	0.01	0.5	0.112805	0.118463	57	0.01	0.45	0.133333	0.123698						0.180478	1305	0	38	21.1295	8.08994	57	5	38	22.9298	7.78244
C20orf44_rs6060370	294	315	75	294	301	83	0.70231	308	309	101	280	307	57	0.00782572	295	320	76	293	296	82	0.645877	588	0.01	0.49	0.10966	0.116595	616	0.01	0.5	0.119383	0.12016	158	0.01	0.5	0.106266	0.120559	0.0985125	588	0	38	21.8367	7.95198	616	0	38	20.8458	8.20434	158	1
C20orf44_rs6060375	635	49		638	40		0.380947	666	52		607	37		0.274257	643	48		630	41		0.583954	1273	0.01	0.5	0.112207	0.117734	89	0.01	0.49	0.134494	0.130854						0.140918	1273	0	38	21.1579	8.06729	89	2	38	21.8764	8.31595
CASP3_rs1049253	440	217	27	442	216	20	0.615252	479	219	20	403	214	27	0.16257	458	209	24	424	224	23	0.454026	882	0.01	0.5	0.109773	0.117875	433	0.01	0.5	0.121363	0.120661	47	0.01	0.38	0.115745	0.115132	0.107378	882	0	38	21.2528	8.12674	433	0	38	21.2286	7.91336	47	4
CASP3_rs2696056	503	162	18	477	192	9	0.0464253	513	186	18	467	168	9	0.350369	499	174	17	481	180	10	0.382389	980	0.01	0.5	0.115255	0.119964	354	0.01	0.49	0.108644	0.115066	27	0.03	0.48	0.118519	0.123591	0.481891	980	0	38	21.5735	7.94386	354	1	38	20.2232	8.44904	27	10
CASP3_rs2705897	42	261	381	48	280	350	0.307546	61	284	373	29	257	358	0.0101165	50	271	370	40	270	361	0.631606	90	0.01	0.48	0.0816667	0.0934152	541	0.01	0.49	0.115527	0.119462	731	0.01	0.5	0.116224	0.120489	0.0385252	90	1	37	19.7333	7.62875	541	0	38	21.1368	8.23091	731	0
CASP3_rs3087455	316	305	63	309	296	73	0.635936	305	348	65	320	253	71	0.00289846	311	303	77	314	298	59	0.341937	625	0.01	0.5	0.116448	0.118165	601	0.01	0.5	0.115241	0.122127	136	0.01	0.48	0.0938971	0.103931	0.0958531	625	0	38	20.9504	8.25781	601	0	38	21.6589	7.76843	136	0
CASP3_rs4647610	7	156	521	14	164	500	0.226646	12	179	527	9	141	494	0.361757	13	163	515	8	157	506	0.597432	21	0.01	0.2	0.0357143	0.0443364	320	0.01	0.49	0.115469	0.11845	1021	0.01	0.5	0.114701	0.119373	7.27918e-05	21	9	30	17.8095	6.50092	320	0	38	21.8375	7.68901	1021	0
CASP7_rs11814042	13	146	525	15	155	508	0.707093	16	166	536	12	135	497	0.547493	14	169	508	14	132	525	0.102236	28	0.01	0.41	0.103214	0.113727	301	0.01	0.5	0.121163	0.126213	1033	0.01	0.5	0.111762	0.116588	0.410567	28	0	33	21.7857	9.10172	301	0	38	21.9369	8.12974	1033	0
CASP7_rs12358524	6	143	535	9	118	551	0.219097	11	136	571	4	125	515	0.28237	5	120	566	10	141	520	0.0849718	15	0.03	0.49	0.102	0.135341	261	0.01	0.48	0.119349	0.117421	1086	0.01	0.5	0.112459	0.118851	0.423296	15	13	36	22.4667	6.88546	261	0	38	22.2989	8.14028	1086	0
CASP7_rs3124738	3	121	559	5	126	546	0.691684	3	129	584	5	118	521	0.700854	4	123	563	4	124	542	0.939277	8	0.01	0.26	0.1125	0.102365	247	0.01	0.48	0.108826	0.115304	1105	0.01	0.5	0.114507	0.119327	0.766995	8	4	32	19.875	10.2182	247	3	38	20.6437	8.04374	1105	0
CASP7_rs3124743	157	334	193	158	344	176	0.634749	177	349	192	138	329	177	0.367175	158	336	197	157	342	172	0.482144	315	0.01	0.49	0.108413	0.111624	678	0.01	0.5	0.115472	0.120091	369	0.01	0.49	0.114824	0.122166	0.722292	315	2	37	21.127	7.84624	678	0	38	21.413	8.10022	369	0
CASP7_rs6421366	8	114	562	1	106	571	0.0534888	7	111	600	2	109	533	0.26614	5	107	579	4	113	554	0.769015	9	0.01	0.48	0.167778	0.147629	220	0.01	0.5	0.111045	0.120979	1133	0.01	0.5	0.113742	0.118038	0.324027	9	10	33	21.8889	8.85218	220	1	38	20.0409	8.28065	1133	0
CASP7_rs6585241	444	213	27	461	195	22	0.462616	478	214	26	427	194	23	0.98903	471	198	22	434	210	27	0.351366	905	0.01	0.5	0.111956	0.116229	408	0.01	0.5	0.115392	0.123749	49	0.01	0.48	0.130816	0.122165	0.530659	905	0	38	21.4044	8.12662	408	1	38	20.7574	7.94406	49	7
CAT_rs17883866	530	144	10	507	156	15	0.388815	549	154	15	488	146	10	0.692126	528	151	12	509	149	13	0.94332	1037	0.01	0.5	0.114446	0.118148	300	0.01	0.49	0.111833	0.11923	25	0.01	0.47	0.1032	0.138946	0.574065	1037	0	38	21.4417	8.07181	300	0	38	20.5367	8.07875	25	8
CAT_rs17884049	63	295	326	70	304	304	0.540318	75	296	347	58	303	283	0.0943833	78	313	300	55	286	330	0.0419292	133	0.01	0.48	0.103759	0.112645	599	0.01	0.5	0.111586	0.118512	630	0.01	0.5	0.11773	0.120146	0.240779	133	0	38	21.6391	7.84445	599	0	38	20.8531	8.11983	630	0
CAT_rs17884132	325	288	70	302	287	89	0.212342	323	305	90	304	270	69	0.515998	332	284	75	295	291	84	0.294115	627	0.01	0.5	0.109601	0.115001	575	0.01	0.5	0.118539	0.121536	159	0.01	0.47	0.111258	0.122762	0.441288	627	0	38	21.1531	8.11531	575	0	38	21.2452	8.1707	159	4
CAT_rs17886184	566	116	2	552	120	6	0.343173	578	135	5	540	101	3	0.251854	575	111	5	543	125	3	0.395125	1118	0.01	0.5	0.11254	0.118489	236	0.01	0.48	0.121186	0.12086	8	0.01	0.16	0.04875	0.0482368	0.164064	1118	0	38	21.2075	8.04875	236	0	38	21.3008	8.26776	8	4
CETP_rs17231576	62	285	337	54	297	327	0.623337	61	290	367	55	292	297	0.158942	67	305	319	49	277	345	0.0866867	116	0.01	0.48	0.110862	0.111944	582	0.01	0.5	0.114966	0.120633	664	0.01	0.5	0.113012	0.118318	0.997964	116	0	38	20.9914	8.06549	582	0	38	21.4656	8.11586	664	0
CETP_rs17231751	82	325	277	77	301	300	0.373692	87	321	310	72	305	267	0.604904	91	313	287	68	313	290	0.217814	159	0.01	0.48	0.111698	0.115129	626	0.01	0.49	0.118403	0.121597	577	0.01	0.5	0.109064	0.116498	0.368036	159	3	38	21.2642	8.19266	626	0	38	21.4984	8.10101	577	0
CETP_rs17231813	2	89	593	5	81	592	0.456395	4	93	621	3	77	564	0.825751	6	78	607	1	92	578	0.0732168	7	0.03	0.16	0.0714286	0.0549025	170	0.01	0.48	0.104824	0.107941	1185	0.01	0.5	0.115181	0.120402	0.734937	7	11	24	16.2857	4.2314	170	4	37	21.3	7.70142	1185	0
CETP_rs17231896	328	294	62	335	275	68	0.621699	362	285	71	301	284	59	0.25896	348	275	68	315	294	62	0.322394	663	0.01	0.5	0.114827	0.12032	569	0.01	0.5	0.113427	0.118171	130	0.01	0.43	0.108769	0.113438	0.842262	663	1	38	21.5385	8.06345	569	0	38	20.9578	8.08787	130	2
CETP_rs17237890	187	343	152	199	330	149	0.727598	192	346	179	194	327	122	0.0252325	198	350	141	188	323	160	0.318071	386	0.01	0.5	0.107927	0.115001	673	0.01	0.5	0.118574	0.122302	301	0.01	0.48	0.109734	0.115435	0.561123	386	0	38	20.8808	8.18623	673	0	38	21.5453	8.14497	301	1
CETP_rs17237974	17	215	452	35	208	435	0.0355921	26	220	472	26	203	415	0.852605	26	208	457	26	215	430	0.716354	52	0.01	0.42	0.102115	0.107527	423	0.01	0.5	0.115485	0.123577	887	0.01	0.49	0.113472	0.117042	0.865682	52	4	35	20.1538	8.16349	423	0	38	21.3759	8.18553	887	0
CETP_rs17238079	474	196	14	452	204	21	0.367242	485	211	22	441	189	13	0.492673	480	193	17	446	207	18	0.467966	926	0.01	0.49	0.114449	0.119489	400	0.01	0.5	0.113525	0.117803	35	0.01	0.5	0.0968571	0.110899	0.826328	926	0	38	21.2581	8.10361	400	0	38	21.0475	8.141	35	9
CETP_rs17238135	550	127	7	534	132	12	0.447194	573	135	10	511	124	9	0.970075	543	136	12	541	123	7	0.428761	1084	0.01	0.5	0.112869	0.117081	259	0.01	0.49	0.11749	0.12531	19	0.01	0.39	0.106842	0.124099	0.641295	1084	0	38	21.3173	8.11749	259	0	37	20.695	7.90175	19	2
CETP_rs17238302	20	194	470	24	171	483	0.369926	25	186	507	19	179	446	0.669453	24	168	499	20	197	454	0.102567	44	0.01	0.43	0.101591	0.110516	365	0.01	0.5	0.112712	0.113203	953	0.01	0.5	0.114586	0.121191	0.897563	44	6	36	20.1136	7.7376	365	0	38	20.9397	8.43147	953	0
CETP_rs17245715	5	109	570	6	93	579	0.483164	5	112	601	6	90	548	0.646427	4	95	592	7	107	557	0.333305	11	0.01	0.24	0.0790909	0.0755585	202	0.01	0.5	0.118812	0.115317	1149	0.01	0.5	0.11309	0.119635	0.351075	11	6	33	19.1818	8.1341	202	0	38	21.1337	8.36761	1149	0
CNDP1_rs11876996	383	259	42	352	275	51	0.27026	390	274	54	345	260	39	0.477161	366	274	51	369	260	42	0.620493	735	0.01	0.5	0.119224	0.123763	534	0.01	0.5	0.109551	0.113644	93	0.01	0.38	0.0933333	0.10336	0.149763	735	0	38	21.3932	8.33441	534	1	38	20.8933	7.74172	93	2
CNDP1_rs1559809	402	250	32	431	219	28	0.195347	440	238	40	393	231	20	0.0651024	416	249	26	417	220	34	0.279575	833	0.01	0.5	0.112653	0.116134	469	0.01	0.5	0.117676	0.123833	60	0.01	0.42	0.0963333	0.113152	0.466065	833	0	38	21.1957	8.09522	469	1	38	21.4904	8.03055	60	1
CNDP1_rs2346064	335	293	56	320	289	69	0.432083	361	296	61	294	286	64	0.212657	339	284	68	316	298	57	0.406254	655	0.01	0.49	0.114702	0.118892	582	0.01	0.5	0.115395	0.120896	125	0.01	0.47	0.10016	0.106937	0.390691	655	3	38	21.3008	7.78434	582	0	38	21.3866	8.36578	125	2
CNDP1_rs4892242	591	87	6	566	108	4	0.216576	605	107	6	552	88	4	0.747286	575	113	3	582	82	7	0.0478958	1157	0.01	0.5	0.113967	0.119089	195	0.01	0.48	0.112769	0.117585	10	0.01	0.37	0.096	0.105114	0.960379	1157	0	38	21.242	8.08616	195	1	38	20.9333	8.14689	10	10
CNDP1_rs4892243	129	341	214	126	330	222	0.845102	115	378	225	140	293	211	0.00805185	136	327	228	119	344	208	0.338214	255	0.01	0.49	0.113569	0.123519	671	0.01	0.5	0.112161	0.116455	436	0.01	0.5	0.116032	0.11952	0.819147	255	1	38	20.8902	8.13976	671	0	38	21.2802	8.09821	436	0
CNDP1_rs6566815	315	306	63	311	296	71	0.730939	326	320	72	300	282	62	0.902566	319	302	70	307	300	64	0.902731	626	0.01	0.49	0.105767	0.111646	602	0.01	0.5	0.118372	0.121592	134	0.01	0.48	0.129403	0.134834	0.0725302	626	0	38	21.0032	7.98879	602	0	38	21.5399	8.25242	134	1
CNDP1_rs7244370	9	158	517	11	164	503	0.789438	9	166	543	11	156	477	0.669488	11	157	523	9	165	497	0.683662	20	0.01	0.25	0.108	0.0785795	322	0.01	0.49	0.115497	0.128103	1020	0.01	0.5	0.113196	0.116342	0.295788	20	5	38	21.75	7.36903	322	0	38	20.4503	8.77118	1020	0
CNDP1_rs733686	58	271	355	52	295	331	0.339574	56	319	343	54	247	343	0.0734866	53	300	338	57	266	348	0.362264	110	0.01	0.5	0.119091	0.117805	566	0.01	0.49	0.107544	0.116611	686	0.01	0.5	0.117843	0.120507	0.0922247	110	3	36	20.4182	7.56911	566	0	37	20.9399	7.86681	686	0
CNDP1_rs7506051	19	224	441	28	214	436	0.381607	21	226	471	26	212	406	0.408449	25	217	449	22	221	428	0.802656	47	0.01	0.3	0.0795745	0.0774304	438	0.01	0.49	0.11347	0.120439	877	0.01	0.5	0.115587	0.119488	0.252964	47	5	36	22.766	7.27477	438	0	38	21.0936	8.06966	877	0
CNDP1_rs8087768	351	284	49	351	266	61	0.390998	382	273	63	320	277	47	0.151619	368	256	67	334	294	43	0.00987638	702	0.01	0.5	0.112821	0.118817	550	0.01	0.5	0.116527	0.120357	110	0.01	0.47	0.104727	0.10991	0.552362	702	1	38	21.1111	7.92649	550	0	38	21.5782	8.22809	110	2
CNDP1_rs8096427	371	261	52	352	278	48	0.558871	363	297	58	360	242	42	0.123733	369	264	58	354	275	42	0.246016	723	0.01	0.5	0.119253	0.123602	539	0.01	0.5	0.106605	0.112221	100	0.01	0.47	0.1113	0.115642	0.29687	723	0	38	21.4578	7.88837	539	0	38	20.9685	8.35442	100	1
COBLL1_rs171392	453	197	34	447	211	20	0.125275	469	223	26	431	185	28	0.539545	475	189	27	425	219	27	0.0935402	900	0.01	0.49	0.115489	0.119935	408	0.01	0.5	0.10875	0.116769	54	0.01	0.38	0.12037	0.113536	0.284319	900	0	38	21.1267	8.13331	408	2	38	21.1495	7.8399	54	1
COH1_rs10955222	486	181	17	494	171	13	0.651406	530	172	16	450	180	14	0.238793	504	177	10	476	175	20	0.145804	980	0.01	0.5	0.112235	0.118126	352	0.01	0.5	0.11767	0.119878	30	0.01	0.4	0.113333	0.126908	0.646124	980	0	38	21.3255	8.14483	352	0	38	20.733	7.79161	30	8
COH1_rs7157	19	221	444	27	217	434	0.482774	22	213	483	24	225	395	0.0732187	13	221	457	33	217	421	0.00652399	46	0.01	0.4	0.0876087	0.104503	438	0.01	0.5	0.117854	0.118996	878	0.01	0.5	0.112938	0.119199	0.10497	46	7	36	21.3478	8.726	438	0	38	20.984	7.85464	878	0
COL4A1_rs10492498	357	272	55	368	261	49	0.709066	382	284	52	343	249	52	0.830838	359	285	47	366	248	57	0.191792	725	0.01	0.5	0.106303	0.114304	533	0.01	0.5	0.123734	0.123426	104	0.01	0.48	0.113365	0.12158	0.0357951	725	0	38	21.2069	8.08595	533	1	38	21.2439	7.96424	104	0
COL4A1_rs1133219	85	318	264	85	302	278	0.677257	80	330	289	90	290	253	0.318362	87	306	283	83	314	259	0.621394	170	0.01	0.48	0.120706	0.123708	620	0.01	0.49	0.111	0.114529	542	0.01	0.5	0.113819	0.120598	0.741003	170	4	38	20.9882	7.88451	620	0	38	21.4516	8.19468	542	0
COL4A1_rs1192198	428	233	23	464	197	17	0.0684005	476	218	24	416	212	16	0.437915	448	220	23	444	210	17	0.654668	892	0.01	0.49	0.11537	0.120122	430	0.01	0.5	0.108558	0.115273	40	0.01	0.41	0.1305	0.123765	0.489939	892	0	38	20.935	8.12461	430	1	38	21.6186	8.01738	40	5
COL4A1_rs12017058	199	337	148	189	329	160	0.670462	208	346	164	180	320	144	0.853698	194	345	152	194	321	156	0.733165	388	0.01	0.5	0.11482	0.117907	666	0.01	0.5	0.113093	0.119333	308	0.01	0.48	0.113442	0.118747	0.903931	388	1	38	21.8067	7.97776	666	0	38	21.0661	8.14798	308	0
COL4A1_rs1562174	275	318	91	279	308	91	0.926164	282	334	102	272	292	80	0.446864	270	328	93	284	298	89	0.451835	554	0.01	0.5	0.117996	0.120371	626	0.01	0.49	0.110399	0.117454	182	0.01	0.5	0.111703	0.118162	0.288699	554	0	38	21.056	8.16149	626	0	38	21.2141	8.04222	182	2
COL4A1_rs2131939	13	170	501	14	147	517	0.381729	15	173	530	12	144	488	0.71145	14	166	511	13	151	507	0.789471	27	0.01	0.38	0.101481	0.0933028	317	0.01	0.5	0.115678	0.12088	1018	0.01	0.5	0.11336	0.118705	0.900463	27	8	35	23.2222	6.99084	317	1	37	21.3722	7.95797	1018	0
COL4A1_rs2391824	98	310	276	85	330	263	0.405062	107	333	278	76	307	261	0.244953	92	311	288	91	329	251	0.250126	183	0.01	0.48	0.103497	0.107871	640	0.01	0.5	0.116859	0.123718	539	0.01	0.5	0.113321	0.116132	0.798926	183	1	38	20.9563	8.01018	640	0	38	21.1187	8.0607	539	2
COL4A1_rs3742207	297	314	73	294	307	77	0.921136	302	338	78	289	283	72	0.500999	303	320	68	288	301	82	0.378845	591	0.01	0.5	0.114569	0.116852	621	0.01	0.5	0.113543	0.120134	150	0.01	0.48	0.1106	0.120782	0.493328	591	0	38	20.9594	8.15767	621	2	38	21.4879	8.02709	150	3
COL4A1_rs4145072	159	339	186	186	309	183	0.175601	180	337	201	165	311	168	0.736624	175	330	186	170	318	183	0.987171	345	0.01	0.49	0.108522	0.113054	648	0.01	0.5	0.112531	0.116181	369	0.01	0.49	0.120461	0.127929	0.567194	345	0	38	21.229	8.02266	648	0	38	20.9676	8.16809	369	0
COL4A1_rs4773139	27	222	435	30	203	445	0.569609	38	213	467	19	212	413	0.0591956	25	222	444	32	203	436	0.471846	57	0.01	0.47	0.147193	0.137162	425	0.01	0.5	0.114635	0.121089	880	0.01	0.5	0.111023	0.116052	0.209584	57	6	37	21.2456	7.66085	425	0	37	21.2965	8.06089	880	0
COL4A1_rs492560	286	314	84	292	302	84	0.875082	308	312	98	270	304	70	0.195621	271	327	93	307	289	75	0.0449436	578	0.01	0.5	0.114619	0.122165	616	0.01	0.49	0.114383	0.116688	168	0.01	0.49	0.107738	0.114451	0.732845	578	1	38	21.4446	7.93111	616	0	38	21.3019	8.18464	168	0
COL4A1_rs496916	95	314	275	90	310	278	0.929249	93	335	290	92	289	263	0.708562	84	320	287	101	304	266	0.293781	185	0.01	0.45	0.108162	0.111486	624	0.01	0.5	0.113446	0.119769	553	0.01	0.5	0.11575	0.119993	0.891824	185	4	38	21	7.77188	624	0	38	21.2708	8.27082	553	0
COL4A1_rs521969	7	129	548	10	111	557	0.368207	7	125	586	10	115	519	0.619033	8	132	551	9	108	554	0.336168	17	0.01	0.33	0.0835294	0.0931357	240	0.01	0.49	0.117208	0.1146	1105	0.01	0.5	0.113357	0.119947	0.239079	17	8	32	20	7.63217	240	1	38	21.2167	8.34124	1105	0
COL4A1_rs529041	2	99	583	7	105	566	0.21001	1	116	601	8	88	548	0.0189847	7	106	578	2	98	571	0.267284	9	0.03	0.3	0.113333	0.103803	204	0.01	0.47	0.110637	0.112885	1149	0.01	0.5	0.114204	0.119903	0.867522	9	13	35	24.3333	8.07775	204	0	38	21.8186	8.27909	1149	0
COL4A1_rs552125	10	146	527	13	156	506	0.589778	10	176	528	13	126	505	0.0596847	11	157	522	12	145	511	0.885603	23	0.01	0.44	0.1	0.111885	302	0.01	0.49	0.107583	0.110675	1033	0.01	0.5	0.116012	0.121247	0.887669	23	0	35	22.4348	9.20388	302	0	38	21.1258	8.06148	1033	0
COL4A1_rs561437	171	349	163	169	331	178	0.568227	191	351	175	149	329	166	0.33123	175	356	159	165	324	182	0.214178	340	0.01	0.48	0.117971	0.118706	680	0.01	0.5	0.113382	0.119639	341	0.01	0.5	0.109971	0.117232	0.399336	340	0	37	20.7471	8.26234	680	0	38	21.5544	8.12458	341	1
COL4A1_rs562992	474	191	19	470	194	14	0.700001	503	199	16	441	186	17	0.773206	477	198	16	467	187	17	0.934847	944	0.01	0.5	0.114047	0.11824	385	0.01	0.5	0.113688	0.121507	33	0.01	0.34	0.102424	0.100344	0.930501	944	0	38	20.9862	8.23417	385	1	38	21.774	7.68849	33	7
COL4A1_rs626444	127	322	235	126	344	208	0.311	131	359	228	122	307	215	0.697995	131	330	230	122	336	213	0.6949	253	0.01	0.5	0.114111	0.124038	666	0.01	0.5	0.115706	0.119057	443	0.01	0.48	0.110339	0.115228	0.759656	253	0	38	20.4625	7.95146	666	0	38	21.1682	8.19932	443	0
COL4A1_rs627527	241	322	121	232	330	116	0.841305	263	327	128	210	325	109	0.178871	233	338	120	240	314	117	0.690356	473	0.01	0.5	0.121776	0.127159	652	0.01	0.49	0.108758	0.11431	237	0.01	0.48	0.11097	0.112609	0.32501	473	1	38	21.0127	8.07669	652	0	38	21.2454	8.19189	237	0
COL4A1_rs630943	54	256	374	53	273	352	0.546984	50	282	386	57	247	340	0.439697	52	269	370	55	260	356	0.902704	107	0.01	0.47	0.119533	0.109668	529	0.01	0.5	0.121626	0.126932	726	0.01	0.5	0.106997	0.113431	0.163962	107	2	36	21.1682	8.18245	529	0	38	21.3875	8.15052	726	0
COL4A1_rs648705	84	324	276	94	302	282	0.505962	90	336	292	88	290	266	0.746562	88	330	273	90	296	285	0.397557	178	0.01	0.5	0.115618	0.119745	626	0.01	0.49	0.119121	0.121733	558	0.01	0.5	0.106918	0.114756	0.30166	178	0	38	20.8371	8.43663	626	0	38	21.2971	8.03121	558	0
COL4A1_rs6492246	23	152	339	21	149	331	0.986555	26	160	348	18	141	322	0.647665	19	152	344	25	149	326	0.585636	44	0.01	0.45	0.116818	0.131074	301	0.01	0.5	0.121694	0.120823	670	0.01	0.49	0.110791	0.118836	0.249107	44	6	38	20.1591	8.08658	301	2	38	21.5449	7.82872	670	0
COL4A1_rs675605	353	267	64	347	267	64	0.989889	378	276	64	322	258	64	0.588574	358	271	62	342	263	66	0.861556	700	0.01	0.5	0.104571	0.111757	534	0.01	0.5	0.125899	0.128261	128	0.01	0.47	0.112344	0.110229	0.0685845	700	1	38	21.1571	7.98252	534	0	38	21.2715	8.26707	128	4
COL4A1_rs679450	207	347	130	208	332	138	0.767518	223	364	131	192	315	137	0.377182	217	347	127	198	332	141	0.436431	415	0.01	0.48	0.113831	0.117519	679	0.01	0.5	0.116318	0.120193	268	0.01	0.5	0.106679	0.116913	0.175497	415	0	37	20.6988	8.19646	679	0	38	21.6996	8.07183	268	1
COL4A1_rs680484	106	331	247	103	305	269	0.362735	108	334	275	101	302	241	0.923544	110	324	256	99	312	260	0.753474	209	0.01	0.49	0.113876	0.111665	636	0.01	0.5	0.115503	0.123713	516	0.01	0.49	0.110795	0.114825	0.737174	209	1	38	21.1914	7.79063	636	0	38	21.3459	8.23646	516	0
COL4A1_rs686090	4	100	580	9	120	549	0.0985257	8	112	598	5	108	531	0.704771	5	118	568	8	102	561	0.471711	13	0.01	0.39	0.0915385	0.10463	220	0.01	0.49	0.108818	0.118578	1129	0.01	0.5	0.114863	0.118934	0.504533	13	11	36	22.3846	7.82665	220	0	38	20.8773	7.85534	1129	0
COL4A1_rs72509	504	170	10	503	158	17	0.323851	529	176	13	478	152	14	0.841866	512	165	14	495	163	13	0.984552	1007	0.01	0.5	0.115184	0.118494	328	0.01	0.5	0.111616	0.121303	27	0.01	0.33	0.0818519	0.0902576	0.23168	1007	0	38	21.1658	8.21961	328	1	38	21.2744	7.74701	27	9
COL4A1_rs7317784	291	318	75	295	302	81	0.725647	321	313	84	265	307	72	0.313617	297	318	76	289	302	80	0.850436	586	0.01	0.49	0.110154	0.117331	620	0.01	0.5	0.11721	0.120904	156	0.01	0.49	0.112756	0.115354	0.747552	586	0	38	20.8737	7.93528	620	0	38	21.3468	8.16514	156	2
COL4A1_rs913745	30	225	429	36	221	421	0.741349	38	227	453	28	219	397	0.518133	43	223	425	23	223	425	0.0566317	66	0.01	0.39	0.0939394	0.105915	446	0.01	0.49	0.109574	0.115303	850	0.01	0.5	0.117341	0.121289	0.222601	66	0	34	20.1818	7.3378	446	0	38	21.1726	8.32456	850	0
COL4A1_rs9521624	28	220	436	37	225	416	0.42343	31	236	451	34	209	401	0.711417	23	236	432	42	209	420	0.0286031	65	0.01	0.48	0.100923	0.124871	445	0.01	0.5	0.112	0.115305	852	0.01	0.5	0.115505	0.120046	0.163412	65	0	33	19.1385	8.52914	445	1	38	21.3124	8.03253	852	0
COL4A1_rs9521666	436	227	21	440	213	25	0.685679	463	228	27	413	212	19	0.6696	462	208	21	414	232	25	0.133753	876	0.01	0.49	0.114018	0.119566	440	0.01	0.5	0.112682	0.115989	46	0.01	0.45	0.116304	0.130271	0.937058	876	0	38	20.9772	8.1233	440	0	38	21.6114	8.09575	46	10
COL4A1_rs9555682	256	329	98	255	329	94	0.968428	269	336	112	242	322	80	0.206886	262	339	90	249	319	102	0.515453	511	0.01	0.49	0.111957	0.116279	658	0.01	0.5	0.113951	0.1198	192	0.01	0.5	0.117656	0.122004	0.933291	511	0	38	20.998	8.09563	658	0	38	21.3389	8.16584	192	1
COL4A2_rs1018644	10	186	488	21	180	477	0.131878	19	189	510	12	177	455	0.575794	19	189	483	12	177	482	0.431497	31	0.01	0.45	0.110968	0.127576	366	0.01	0.5	0.111694	0.115492	965	0.01	0.5	0.114497	0.119736	0.92533	31	5	35	19.9355	8.49288	366	0	38	21.7896	8.12114	965	0
COL4A2_rs1049906	145	329	205	137	337	199	0.824406	150	351	211	132	315	193	0.970838	149	337	202	133	329	202	0.752459	282	0.01	0.49	0.120745	0.120085	666	0.01	0.5	0.113514	0.119324	404	0.01	0.49	0.108985	0.116601	0.246747	282	2	38	21.0461	8.08461	666	0	38	20.9444	8.06486	404	0
COL4A2_rs11069840	3	90	591	4	101	573	0.654708	4	101	613	3	90	551	1	4	102	585	3	89	579	0.703484	7	0.01	0.33	0.127143	0.117716	191	0.01	0.5	0.112304	0.125005	1164	0.01	0.5	0.113806	0.117753	0.391579	7	4	30	20.2857	9.65599	191	3	36	21.4712	7.85379	1164	0
COL4A2_rs11839503	580	102	2	576	100	2	0.977232	614	101	3	542	101	1	0.500608	574	115	2	582	87	2	0.17308	1156	0.01	0.5	0.113374	0.118841	202	0.01	0.48	0.114505	0.118031	4	0.03	0.34	0.155	0.141539	0.673536	1156	0	38	21.1038	8.13147	202	0	38	21.6733	7.8228	4	22
COL4A2_rs1556122	322	299	63	314	299	65	0.947687	341	309	68	295	289	60	0.782034	328	296	67	308	302	61	0.712178	636	0.01	0.49	0.11011	0.113618	598	0.01	0.5	0.114298	0.12071	128	0.01	0.47	0.128359	0.133031	0.785674	636	0	38	21.2956	8.17394	598	1	38	21.1722	8.08718	128	4
COL4A2_rs1556124	411	235	38	448	209	21	0.0184143	466	219	33	393	225	26	0.212614	448	212	31	411	232	28	0.312841	859	0.01	0.5	0.114459	0.118815	444	0.01	0.48	0.111239	0.118821	59	0.01	0.39	0.120339	0.117956	0.408331	859	0	38	21.5763	8.01425	444	0	38	20.3446	8.1756	59	6
COL4A2_rs1927343	296	319	69	304	314	60	0.691781	325	327	66	275	306	63	0.622818	312	321	58	288	312	71	0.346729	600	0.01	0.5	0.109967	0.119199	633	0.01	0.5	0.115861	0.117114	129	0.01	0.47	0.120078	0.124496	0.242024	600	0	38	21.0983	8.01284	633	0	38	21.3965	8.2356	129	6
COL4A2_rs2094700	257	327	100	243	326	109	0.693213	268	333	117	232	320	92	0.401887	249	337	105	251	316	104	0.822128	500	0.01	0.48	0.10554	0.108389	653	0.01	0.5	0.12026	0.127735	209	0.01	0.44	0.112488	0.112175	0.476276	500	0	38	21.008	7.76354	653	0	38	20.9602	8.30745	209	3
COL4A2_rs2274545	347	285	52	342	283	53	0.985491	373	297	48	316	271	57	0.261819	350	297	44	339	271	61	0.149412	689	0.01	0.5	0.114093	0.11757	568	0.01	0.5	0.11706	0.12217	105	0.01	0.44	0.0924762	0.105291	0.148654	689	0	38	21.2293	7.90457	568	0	37	21.2342	8.19557	105	3
COL4A2_rs2281973	68	303	313	78	311	289	0.42635	68	342	308	78	272	294	0.0832648	69	294	328	77	320	274	0.0476184	146	0.01	0.49	0.108493	0.113874	614	0.01	0.5	0.108534	0.114091	602	0.01	0.49	0.12015	0.124226	0.62595	146	0	38	21.3356	8.5865	614	0	38	21.1059	7.85016	602	0
COL4A2_rs2296845	203	326	155	204	342	132	0.333907	213	355	150	194	313	137	0.95321	208	323	160	199	345	127	0.108042	407	0.01	0.5	0.118428	0.124712	668	0.01	0.49	0.11006	0.115447	287	0.01	0.49	0.115296	0.117618	0.784931	407	0	38	21.0295	8.25273	668	2	38	21.3144	8.08445	287	0
COL4A2_rs2296851	6	171	507	11	132	535	0.0293175	7	152	559	10	151	483	0.376475	7	163	521	10	140	521	0.361636	17	0.01	0.47	0.128235	0.143232	303	0.01	0.48	0.120396	0.120019	1042	0.01	0.5	0.111468	0.117935	0.35728	17	5	33	20.5882	8.40431	303	2	38	21.5512	7.69815	1042	0
COL4A2_rs3803229	68	289	327	67	291	320	0.967606	64	312	342	71	268	305	0.404307	74	306	311	61	274	336	0.15776	135	0.01	0.49	0.126148	0.130681	580	0.01	0.5	0.111621	0.116371	647	0.01	0.5	0.11289	0.118207	0.768671	135	0	37	20.6741	8.55346	580	0	38	21.1086	7.83488	647	0
COL4A2_rs3803230	542	133	9	528	140	10	0.845604	555	153	10	515	120	9	0.469542	548	136	7	522	137	12	0.436151	1070	0.01	0.5	0.113056	0.117385	273	0.01	0.5	0.116886	0.125177	19	0.01	0.32	0.101579	0.100458	0.957224	1070	0	38	21.1178	8.06575	273	1	38	21.6044	8.08532	19	6
COL4A2_rs3803233	162	351	171	160	329	189	0.449012	168	354	196	154	326	164	0.747128	163	353	175	159	327	185	0.597218	322	0.01	0.48	0.105994	0.112218	680	0.01	0.5	0.117765	0.122834	360	0.01	0.5	0.112778	0.116373	0.756362	322	2	38	21.0745	7.92256	680	0	38	21.3118	7.8725	360	0
COL4A2_rs387298	328	289	67	329	277	72	0.819604	347	298	73	310	268	66	0.99674	323	294	74	334	272	65	0.524149	657	0.01	0.5	0.111872	0.119859	566	0.01	0.49	0.113869	0.117179	139	0.01	0.47	0.121295	0.119999	0.300792	657	0	38	21.5693	8.28743	566	0	38	20.8481	7.93725	139	3
COL4A2_rs4255644	53	267	364	50	278	350	0.757618	54	277	387	49	268	327	0.490189	44	277	370	59	268	344	0.223715	103	0.01	0.5	0.109126	0.123082	545	0.01	0.48	0.114642	0.11969	714	0.01	0.5	0.113571	0.117469	0.493573	103	4	37	20.165	8.66828	545	0	38	21.0532	8.08974	714	0
COL4A2_rs4284503	183	329	172	165	347	166	0.478635	187	370	161	161	306	177	0.093582	162	369	160	186	307	178	0.0182645	348	0.01	0.5	0.105517	0.111127	676	0.01	0.49	0.116124	0.120236	338	0.01	0.5	0.11713	0.123078	0.819055	348	1	38	21.3592	7.92801	676	0	38	21.324	7.93212	338	0
COL4A2_rs4447275	232	331	121	212	339	127	0.571393	225	359	134	219	311	114	0.570343	229	335	127	215	335	121	0.8676	444	0.01	0.49	0.119077	0.122142	670	0.01	0.5	0.114045	0.117551	248	0.01	0.5	0.102944	0.11532	0.202285	444	2	38	21.5653	8.09329	670	0	38	21.0299	7.98835	248	1
COL4A2_rs445348	9	123	552	3	132	543	0.186934	8	135	575	4	120	520	0.643712	5	124	562	7	131	533	0.625315	12	0.01	0.43	0.131667	0.129743	255	0.01	0.5	0.116784	0.12447	1095	0.01	0.49	0.11274	0.117297	0.793809	12	2	38	24.3333	11.0563	255	2	38	21.1922	8.24038	1095	0
COL4A2_rs447049	396	257	31	407	235	36	0.473894	444	243	31	359	249	36	0.0663507	387	266	38	416	226	29	0.0730905	803	0.01	0.5	0.111108	0.117763	492	0.01	0.48	0.114878	0.119293	67	0.01	0.47	0.135373	0.125074	0.149964	803	0	38	21.1631	8.25978	492	0	38	21.1159	7.91431	67	5
COL4A2_rs4512966	190	350	144	178	336	164	0.376582	198	358	162	170	328	146	0.879841	206	334	151	162	352	157	0.0624537	368	0.01	0.49	0.121223	0.12381	686	0.01	0.5	0.112624	0.117449	308	0.01	0.48	0.106948	0.115128	0.49145	368	0	38	21.4049	8.01135	686	0	38	21.3061	8.1035	308	3
COL4A2_rs4771678	57	295	332	47	295	336	0.621357	60	292	366	44	298	302	0.098048	45	304	342	59	286	326	0.283441	104	0.01	0.45	0.1225	0.130665	590	0.01	0.5	0.108339	0.11373	668	0.01	0.5	0.116991	0.12103	0.578938	104	3	37	20.2692	8.77135	590	0	38	20.9424	8.19313	668	0
COL4A2_rs4771685	224	335	125	232	320	126	0.800777	244	357	117	212	298	134	0.0945881	231	335	125	225	320	126	0.942124	456	0.01	0.5	0.118311	0.120148	655	0.01	0.5	0.111573	0.116437	251	0.01	0.48	0.110677	0.122144	0.314254	456	0	38	21.0439	8.13284	655	0	38	21.2595	8.1065	251	1
COL4A2_rs4773155	117	339	228	122	322	234	0.743368	118	346	254	121	315	208	0.360948	123	340	228	116	321	234	0.77037	239	0.01	0.48	0.1159	0.116939	661	0.01	0.5	0.116157	0.117976	462	0.01	0.5	0.108939	0.120766	0.201735	239	2	38	21.3431	8.33436	661	0	38	21.5083	8.01714	462	0
COL4A2_rs4773173	290	326	68	293	310	75	0.697267	323	323	72	260	313	71	0.226174	300	319	72	283	317	71	0.902154	583	0.01	0.5	0.116021	0.122025	636	0.01	0.49	0.114638	0.117046	143	0.01	0.48	0.0997203	0.112042	0.0888097	583	0	38	21.2058	7.95729	636	0	38	21.6242	8.135	143	3
COL4A2_rs7140030	39	267	378	33	255	390	0.630125	35	285	398	37	237	370	0.488326	32	265	394	40	257	374	0.538726	72	0.01	0.47	0.117222	0.125071	522	0.01	0.5	0.115651	0.118242	768	0.01	0.5	0.111979	0.118551	0.716856	72	8	37	20.5	7.89901	522	0	38	21.3391	8.21554	768	0
COL4A2_rs7319311	325	277	82	304	294	80	0.552511	327	299	92	302	272	70	0.538147	300	306	85	329	265	77	0.110273	629	0.01	0.48	0.113227	0.116144	571	0.01	0.49	0.112189	0.118243	162	0.01	0.5	0.120556	0.130214	0.713912	629	0	38	21.07	8.07557	571	0	38	21.2469	8.15101	162	2
COL4A2_rs7322495	383	260	41	386	246	46	0.71894	417	249	52	352	257	35	0.0863053	388	258	45	381	248	42	0.964456	769	0.01	0.5	0.110325	0.1185	506	0.01	0.5	0.120573	0.119772	87	0.01	0.44	0.102989	0.113518	0.0905659	769	0	38	20.7061	8.08657	506	0	38	21.8478	8.17304	87	0
COL4A2_rs7323041	99	332	253	117	303	258	0.242011	120	325	273	96	310	238	0.499511	108	328	255	108	307	256	0.824146	216	0.01	0.5	0.114213	0.119122	635	0.01	0.49	0.115638	0.118557	511	0.01	0.5	0.110978	0.118909	0.69627	216	0	37	20.4769	8.64436	635	0	38	21.578	7.99279	511	1
COL4A2_rs7326145	61	285	331	63	280	327	0.969589	66	285	359	58	280	299	0.352152	57	294	332	67	271	326	0.471108	124	0.01	0.47	0.113468	0.119559	565	0.01	0.5	0.113788	0.116801	658	0.01	0.5	0.11345	0.120355	0.644392	124	6	38	20.7823	7.83422	565	0	38	21.3097	8.29047	658	0
COL4A2_rs7991436	35	235	414	40	219	419	0.638529	43	244	431	32	210	402	0.571289	41	231	419	34	223	414	0.778498	75	0.01	0.41	0.0976	0.10142	454	0.01	0.5	0.116189	0.12216	833	0.01	0.5	0.113733	0.118261	0.682261	75	5	36	21.2267	8.12333	454	1	38	21.511	8.02912	833	0
COL4A2_rs7994073	460	209	15	452	195	31	0.0461678	479	210	29	433	194	17	0.362405	450	215	26	462	189	20	0.318277	912	0.01	0.5	0.115888	0.120272	404	0.01	0.5	0.110718	0.115961	46	0.01	0.45	0.0954348	0.111489	0.392665	912	0	38	21.182	8.13159	404	0	38	21.5074	7.93663	46	5
COL4A2_rs912947	183	359	142	198	342	138	0.594036	205	375	138	176	326	142	0.434879	194	360	137	187	341	143	0.783406	381	0.01	0.49	0.111995	0.115265	701	0.01	0.5	0.113324	0.117756	280	0.01	0.5	0.116786	0.125873	0.907031	381	1	38	21.2598	7.68684	701	0	38	21.301	8.19647	280	3
COL4A2_rs9515201	55	299	330	62	290	325	0.759217	63	303	351	54	286	304	0.729884	61	282	347	56	307	308	0.190351	117	0.01	0.44	0.10094	0.114906	589	0.01	0.5	0.116044	0.118977	655	0.01	0.5	0.113924	0.119218	0.140209	117	5	38	20.4017	8.71093	589	0	38	21.382	8.04019	655	0
COL4A2_rs9515212	227	326	131	243	321	114	0.419011	248	335	135	222	312	110	0.677286	228	333	130	242	314	115	0.450785	470	0.01	0.5	0.11617	0.122413	647	0.01	0.49	0.1117	0.116896	245	0.01	0.49	0.114041	0.116628	0.89846	470	0	38	20.7255	8.34716	647	1	38	21.5811	8.00788	245	0
COL4A2_rs9521694	19	168	497	25	173	480	0.556028	27	170	521	17	171	456	0.279145	20	170	501	24	171	476	0.697687	44	0.01	0.4	0.0886364	0.0948828	341	0.01	0.48	0.121789	0.123455	977	0.01	0.5	0.111955	0.11786	0.443057	44	5	34	19.7727	8.24583	341	1	38	21.912	8.10725	977	0
COL4A2_rs9521718	102	361	221	101	333	244	0.32655	107	354	257	96	340	208	0.362505	100	349	242	103	345	223	0.763712	203	0.01	0.48	0.0992118	0.10993	694	0.01	0.49	0.116715	0.117688	465	0.01	0.5	0.115419	0.123612	0.0594627	203	3	38	19.7192	8.3099	694	0	38	21.6254	8.10364	465	0
COL4A2_rs9521720	102	361	221	101	331	245	0.286586	107	353	257	96	339	209	0.383226	100	348	242	103	344	224	0.779331	203	0.01	0.48	0.0992118	0.10993	692	0.01	0.49	0.11685	0.117811	466	0.01	0.5	0.115236	0.123543	0.0586858	203	3	38	19.7192	8.3099	692	0	38	21.6084	8.10878	466	0
COL4A2_rs9521721	102	361	221	101	333	244	0.32655	107	354	257	96	340	208	0.362505	100	349	242	103	345	223	0.763712	203	0.01	0.48	0.0992118	0.10993	694	0.01	0.49	0.116715	0.117688	465	0.01	0.5	0.115419	0.123612	0.0594627	203	3	38	19.7192	8.3099	694	0	38	21.6254	8.10364	465	0
COL4A2_rs9521724	84	321	279	95	309	274	0.636758	100	321	297	79	309	256	0.427742	95	310	286	84	320	267	0.553626	179	0.01	0.5	0.114246	0.122886	630	0.01	0.5	0.121841	0.123336	553	0.01	0.49	0.104159	0.111245	0.0227915	179	0	38	21.581	7.76609	630	0	38	21.3889	8.01169	553	1
COL4A2_rs9521725	542	132	10	518	149	11	0.439918	568	137	13	492	144	8	0.256058	529	152	10	531	129	11	0.440106	1060	0.01	0.49	0.109358	0.11284	281	0.01	0.5	0.130356	0.138399	21	0.01	0.39	0.107619	0.10807	0.444603	1060	0	38	21.1887	8.09016	281	0	37	21.1281	8.08557	21	10
COL4A2_rs9521728	658	25	1	654	24	0	1	696	22	0	616	27	1	0.245711	668	23	0	644	26	1	0.612251	1312	0.01	0.5	0.111989	0.117203	49	0.01	0.48	0.158571	0.149192	1	0.11	0.11	0.11		0.204476	1312	0	38	21.1288	8.10511	49	6	35	23.3673	7.23618	1	15
COL4A2_rs9521733	259	340	85	260	328	90	0.849896	293	337	88	226	331	87	0.0954298	266	338	87	253	330	88	0.938738	519	0.01	0.5	0.112697	0.119145	668	0.01	0.5	0.115973	0.119294	175	0.01	0.48	0.107714	0.115572	0.348948	519	0	38	21.3449	7.98518	668	0	38	21.4087	8.11549	175	3
COL4A2_rs9521783	6	103	575	7	114	557	0.612292	6	119	593	7	98	539	0.713027	6	102	583	7	115	549	0.469655	13	0.01	0.32	0.106923	0.110105	217	0.01	0.5	0.115207	0.123589	1132	0.01	0.5	0.113445	0.117946	0.948816	13	6	34	18.4615	8.91268	217	5	38	21.7558	8.04042	1132	0
COL4A2_rs9559792	4	112	568	3	101	574	0.702077	3	96	619	4	117	523	0.0416742	3	113	575	4	100	567	0.702093	7	0.01	0.28	0.155714	0.0984644	213	0.01	0.48	0.111925	0.114321	1142	0.01	0.5	0.11373	0.119661	0.403862	7	16	35	27.1429	6.76827	213	3	38	20.4413	8.13173	1142	0
COL4A2_rs9559799	332	282	70	312	302	64	0.461662	348	301	69	296	283	65	0.647924	337	292	62	307	292	72	0.395023	644	0.01	0.5	0.115404	0.11839	584	0.01	0.48	0.111866	0.117784	134	0.01	0.5	0.113134	0.124915	0.484443	644	0	38	21.6475	7.93666	584	0	38	21.0086	8.18702	134	4
COL4A2_rs9583484	15	200	469	19	180	479	0.448073	17	202	499	17	178	449	0.941885	18	202	471	16	178	477	0.502766	34	0.01	0.35	0.0908824	0.0982072	380	0.01	0.48	0.114737	0.119937	948	0.01	0.5	0.114051	0.118915	0.632011	34	5	35	21.7647	6.60146	380	0	36	21.3526	7.97535	948	0
COL4A2_rs9583500	36	213	435	25	218	435	0.366316	28	224	466	33	207	404	0.476255	28	227	436	33	204	434	0.508568	61	0.01	0.37	0.102787	0.107984	431	0.01	0.5	0.115986	0.124584	870	0.01	0.5	0.113276	0.116509	0.767308	61	4	37	21.7869	8.86024	431	0	38	20.7494	8.00769	870	0
COX4I1_rs2075532	24	206	453	28	209	441	0.786949	30	211	476	22	204	418	0.549748	32	217	441	20	198	453	0.17184	52	0.01	0.35	0.104808	0.0968624	415	0.01	0.49	0.115157	0.121776	894	0.01	0.5	0.113579	0.118547	0.979374	52	3	32	20.8654	6.84572	415	0	38	21.6747	8.27736	894	0
COX4I2_rs6058259	351	278	55	343	280	55	0.964757	358	304	56	336	254	54	0.547844	348	282	61	346	276	49	0.579272	694	0.01	0.5	0.115476	0.120968	558	0.01	0.5	0.112079	0.1158	110	0.01	0.48	0.110273	0.119812	0.867209	694	0	38	21.4222	7.86184	558	0	38	21.2527	8.23547	110	2
COX4I2_rs6060399	21	187	476	20	197	461	0.7886	23	198	497	18	186	440	0.807601	24	195	472	17	189	465	0.592705	41	0.01	0.41	0.127317	0.120125	384	0.01	0.5	0.111693	0.116103	937	0.01	0.5	0.113874	0.119786	0.681718	41	4	38	21.6585	8.95994	384	1	38	21.1641	8.56776	937	0
COX4I2_rs6060454	579	102	3	574	94	10	0.127676	598	108	12	555	88	1	0.00751337	589	93	9	564	103	4	0.262858	1153	0.01	0.5	0.115291	0.119671	196	0.01	0.49	0.106633	0.114143	13	0.01	0.35	0.0753846	0.0954477	0.305133	1153	0	38	21.3955	8.12979	196	2	37	20.2959	7.62749	13	2
COX4I2_rs6088864	31	219	434	32	217	429	0.985719	25	235	458	38	201	405	0.101956	36	220	435	27	216	428	0.589594	63	0.01	0.48	0.119365	0.130122	436	0.01	0.5	0.113945	0.116702	863	0.01	0.5	0.113105	0.118982	0.96951	63	4	38	20.3175	8.52288	436	0	38	21.2546	8.55875	863	0
COX5A_rs11072514	146	338	200	133	346	199	0.716589	138	360	220	141	324	179	0.350157	147	351	193	132	333	206	0.494291	279	0.01	0.5	0.129964	0.125825	684	0.01	0.49	0.109327	0.117541	399	0.01	0.49	0.109699	0.114838	0.0383197	279	2	38	21.7348	8.30454	684	0	38	21.1886	7.99896	399	0
COX5A_rs8042694	342	277	65	350	278	50	0.3619	368	295	55	324	260	60	0.548108	342	285	64	350	270	51	0.441092	692	0.01	0.49	0.113092	0.118717	555	0.01	0.5	0.11009	0.116804	115	0.01	0.5	0.134348	0.126561	0.0278688	692	0	38	21.1763	7.97577	555	0	38	20.9423	8.18361	115	2
COX6A1_rs2076022	125	306	251	122	288	263	0.667547	138	308	269	109	286	245	0.550274	127	301	258	120	293	256	0.950108	247	0.01	0.49	0.122753	0.128906	594	0.01	0.5	0.112475	0.114309	514	0.01	0.49	0.111012	0.118815	0.638721	247	0	38	20.9069	8.16418	594	0	38	21.3704	8.11786	514	0
COX6A1_rs3901251	1	65	618	3	67	608	0.669116	2	72	644	2	60	582	0.893164	3	63	625	1	69	601	0.473051	4	0.03	0.32	0.1125	0.139613	132	0.01	0.48	0.132273	0.132173	1226	0.01	0.5	0.111664	0.117045	0.151794	4	13	29	18.75	7.32006	132	4	37	22.0379	7.91115	1226	0
COX6A1_rs968474	93	295	296	79	324	275	0.197335	86	328	304	86	291	267	0.748622	96	298	297	76	321	274	0.150453	172	0.01	0.47	0.112674	0.115307	619	0.01	0.5	0.109079	0.11443	571	0.01	0.49	0.118932	0.124145	0.462207	172	0	37	21.4012	7.73589	619	0	38	21.1793	8.13788	571	0
COX6A2_rs4889657	611	69	4	602	73	3	0.8482	661	56	1	552	86	6	0.000206429	620	68	3	593	74	4	0.69959	1213	0.01	0.5	0.112869	0.117647	142	0.01	0.48	0.122324	0.129065	7	0.03	0.23	0.0757143	0.0756873	0.842965	1213	0	38	21.2803	8.08763	142	0	37	20.4437	8.03761	7	16
COX6A2_rs8055941	1	26	657	0	29	649	0.681614	1	31	686	0	24	620	0.629839	1	30	660	0	25	646	0.631509	1	0.03	0.03	0.03		55	0.01	0.48	0.107818	0.111467	1306	0.01	0.5	0.113974	0.119063	0.704905	1	17	17	17		55	3	37	20	8.1468	1306	0
COX6B1_rs3761093	63	289	332	70	293	315	0.665353	62	318	338	71	264	309	0.232207	68	296	327	65	286	320	0.990114	133	0.01	0.41	0.0915038	0.0947205	582	0.01	0.5	0.105137	0.111965	647	0.01	0.5	0.125889	0.127536	0.0222699	133	0	36	20.8045	8.15797	582	0	38	20.8007	8.27901	647	0
COX6B1_rs7254601	402	245	37	367	261	50	0.134577	399	270	49	370	236	38	0.695374	391	264	36	378	242	51	0.173578	769	0.01	0.5	0.120793	0.123895	506	0.01	0.5	0.104743	0.112312	87	0.01	0.43	0.102529	0.104026	0.0560751	769	0	38	21.4304	8.0844	506	0	38	20.9012	8.27845	87	6
COX7A1_rs7255180	2	81	601	2	72	604	0.809665	2	77	639	2	76	566	0.831284	3	73	615	1	80	590	0.44395	4	0.01	0.03	0.0225	0.00957427	153	0.01	0.48	0.108497	0.122543	1205	0.01	0.5	0.114622	0.11833	0.0517641	4	10	18	14	3.65148	153	2	38	20.8301	7.81765	1205	0
COX7A1_rs753420	373	257	54	351	267	60	0.5593	382	277	59	342	247	55	0.97532	354	280	57	370	244	57	0.28291	724	0.01	0.5	0.113232	0.118204	524	0.01	0.48	0.114924	0.118419	114	0.01	0.48	0.110614	0.124149	0.896907	724	0	38	21.0249	8.28349	524	0	38	21.5248	7.81143	114	6
COX7A2L_rs10206058	271	327	86	276	309	93	0.669423	284	338	96	263	298	83	0.882323	275	335	81	272	301	98	0.208499	547	0.01	0.49	0.105576	0.112108	636	0.01	0.5	0.118742	0.122848	179	0.01	0.48	0.120335	0.122566	0.403511	547	0	38	21.234	7.91346	636	0	38	21.2626	8.2551	179	2
COX7A2L_rs2041354	221	341	122	212	340	126	0.893629	227	351	140	206	330	108	0.411121	221	350	120	212	331	128	0.713589	433	0.01	0.49	0.106282	0.112278	681	0.01	0.5	0.115888	0.121743	248	0.01	0.48	0.120444	0.121009	0.559563	433	0	38	21.1363	7.90876	681	0	38	21.1777	8.26434	248	2
COX7A2L_rs3764907	317	296	71	301	318	59	0.319085	332	319	67	286	295	63	0.788563	311	309	71	307	305	59	0.658946	618	0.01	0.5	0.1211	0.121915	614	0.01	0.49	0.105993	0.114983	130	0.01	0.49	0.114538	0.119236	0.0811468	618	0	38	21.3851	8.08387	614	0	38	20.9658	8.18169	130	4
COX7A2L_rs3806584	19	170	495	14	198	466	0.16002	18	200	500	15	168	461	0.739468	18	179	494	15	189	467	0.607303	33	0.01	0.44	0.142121	0.144693	368	0.01	0.49	0.107038	0.113884	961	0.01	0.5	0.115224	0.119481	0.418557	33	10	35	23.4242	7.18084	368	0	38	21.0625	7.91707	961	0
COX7A2_rs240423	2	77	605	3	68	607	0.67634	1	70	647	4	75	565	0.174877	3	72	616	2	73	596	0.912718	5	0.03	0.29	0.114	0.105972	145	0.01	0.49	0.120759	0.127579	1212	0.01	0.5	0.112814	0.117722	0.528572	5	16	38	29.6	9.01665	145	2	36	21.5793	7.78859	1212	0
COX7A2_rs409536	4	95	585	5	89	584	0.848173	2	93	623	7	91	546	0.14543	5	95	591	4	89	578	0.922385	9	0.03	0.29	0.105556	0.0879078	184	0.01	0.49	0.119293	0.124821	1169	0.01	0.5	0.11284	0.117986	0.417928	9	16	38	26	8.51469	184	2	38	21.2554	7.91933	1169	0
COX8A_rs11231664	235	329	119	241	317	118	0.876538	241	349	127	235	297	110	0.510854	247	339	105	229	307	132	0.084306	476	0.01	0.5	0.110546	0.117739	646	0.01	0.5	0.11709	0.121033	237	0.01	0.47	0.11135	0.114994	0.449769	476	2	38	20.7836	8.11946	646	0	38	21.4133	8.10002	237	0
COX8A_rs480211	170	356	158	189	327	162	0.326916	188	354	176	171	329	144	0.643371	161	365	165	198	318	155	0.0291237	359	0.01	0.47	0.105627	0.109995	683	0.01	0.5	0.116896	0.121429	320	0.01	0.5	0.115781	0.122159	0.428228	359	0	38	21.2563	8.1382	683	0	38	21.265	8.11745	320	2
CPSF4_rs13243267	7	122	555	6	101	571	0.310815	7	123	588	6	100	538	0.715754	5	116	570	8	107	556	0.623636	13	0.01	0.3	0.0976923	0.0939108	223	0.01	0.49	0.115919	0.118127	1126	0.01	0.5	0.113401	0.119151	0.809778	13	8	31	21.0769	7.49957	223	3	38	21.6951	8.01611	1126	0
CPSF4_rs3779354	608	74	2	599	76	3	0.892881	639	78	1	568	72	4	0.377013	616	71	4	591	79	1	0.286506	1207	0.01	0.5	0.113935	0.118253	150	0.01	0.49	0.113533	0.124006	5	0.03	0.11	0.052	0.0349285	0.552513	1207	0	38	21.3024	7.99319	150	0	36	20.54	8.73367	5	4
CRP_rs1130864	70	310	304	73	288	317	0.574969	79	293	346	64	305	275	0.051386	72	298	321	71	300	300	0.806138	143	0.01	0.41	0.108252	0.110072	598	0.01	0.5	0.115184	0.118515	621	0.01	0.5	0.113446	0.120939	0.814577	143	3	35	21.4476	8.09162	598	2	38	21.5619	7.98378	621	0
CRP_rs1205	72	306	306	69	305	304	0.97763	75	298	345	66	313	265	0.0245974	74	304	313	67	307	297	0.784555	141	0.01	0.47	0.12695	0.123952	611	0.01	0.5	0.11748	0.121284	610	0.01	0.5	0.10677	0.114563	0.0575252	141	0	38	21.2057	8.52267	611	1	38	20.892	7.93011	610	0
CRP_rs1800947	592	89	3	590	86	2	0.939513	632	83	3	550	92	2	0.274846	592	96	3	590	79	2	0.514351	1182	0.01	0.5	0.112496	0.117601	175	0.01	0.49	0.1208	0.126024	5	0.03	0.31	0.14	0.131149	0.784312	1182	0	38	21.2377	8.08539	175	0	38	20.9143	8.17331	5	20
CRP_rs2808630	359	269	56	348	280	50	0.709321	351	303	64	356	246	42	0.0381821	341	287	63	366	262	43	0.0642603	707	0.01	0.5	0.1186	0.120326	549	0.01	0.5	0.109599	0.11749	106	0.01	0.49	0.101792	0.11348	0.169799	707	0	38	21.0297	8.06194	549	0	38	21.3297	8.08659	106	4
CRP_rs3091244	93	287	304	100	262	316	0.451271	109	264	345	84	285	275	0.0188592	96	274	321	97	275	299	0.786402	193	0.01	0.47	0.109689	0.117202	549	0.01	0.5	0.115155	0.116806	620	0.01	0.5	0.113581	0.12099	0.476894	193	3	35	21.1554	8.05299	549	2	38	21.6776	7.97623	620	0
CRP_rs3093059	608	76		594	84		0.50102	627	91		575	69		0.274081	624	67		578	93		0.0184077	1202	0.01	0.5	0.113536	0.117481	160	0.01	0.5	0.114625	0.127959						0.436756	1202	0	38	21.376	8.06954	160	0	37	19.9187	8.08988
CTGF_rs928501	38	278	368	35	261	382	0.638687	43	271	404	30	268	346	0.245755	38	273	380	35	266	370	0.982903	73	0.01	0.48	0.109178	0.115443	539	0.01	0.49	0.115436	0.119079	750	0.01	0.5	0.112827	0.118893	0.824367	73	6	37	20.3699	7.31153	539	0	38	21.2746	8.05711	750	0
CTGF_rs9399005	47	264	373	44	273	361	0.80641	49	286	383	42	251	351	0.920991	47	260	384	44	277	350	0.378691	91	0.01	0.41	0.132088	0.123671	537	0.01	0.5	0.113762	0.121087	734	0.01	0.5	0.111308	0.116271	0.498054	91	0	37	21.3516	8.42005	537	0	38	20.9888	8.11852	734	2
CXCL12_rs1413519	24	198	462	15	168	495	0.0601648	22	190	506	17	176	451	0.842899	17	188	486	22	178	471	0.654876	39	0.01	0.35	0.111795	0.0982712	366	0.01	0.49	0.119153	0.118454	957	0.01	0.5	0.111641	0.119606	0.216313	39	4	37	23.8205	8.31572	366	0	38	22	8.154	957	0
CXCL12_rs197452	9	175	500	12	201	465	0.1807	9	208	501	12	168	464	0.337596	15	193	483	6	183	482	0.152915	21	0.01	0.39	0.119048	0.126961	376	0.01	0.49	0.106729	0.116347	965	0.01	0.5	0.116249	0.119455	0.458053	21	10	36	23.3333	6.83618	376	0	38	21.0824	8.303	965	0
CXCL12_rs2297630	34	260	390	43	277	358	0.234328	39	299	380	38	238	368	0.213574	39	276	376	38	261	372	0.926987	77	0.01	0.5	0.0951948	0.108344	537	0.01	0.5	0.117691	0.121927	748	0.01	0.49	0.112674	0.11733	0.0844627	77	4	36	19.5974	7.69528	537	1	38	21.0261	7.9656	748	0
CXCL12_rs266087	97	311	275	82	327	268	0.420562	95	338	283	84	300	260	0.950542	91	336	263	88	302	280	0.348446	179	0.01	0.49	0.109553	0.122954	638	0.01	0.49	0.111207	0.11515	543	0.01	0.5	0.117551	0.121064	0.338966	179	0	38	21.2793	8.4068	638	0	38	21.2288	8.16092	543	0
CXCL12_rs2839685	17	167	499	11	140	525	0.115275	15	161	539	13	146	485	1	12	150	527	16	157	497	0.508929	28	0.01	0.28	0.0917857	0.0872227	307	0.01	0.49	0.120293	0.119758	1024	0.01	0.5	0.112402	0.119226	0.245367	28	4	37	24.2143	8.76592	307	0	38	22.0163	8.09117	1024	0
CXCL12_rs2861442	337	293	54	313	305	60	0.492601	352	315	51	298	283	63	0.176691	334	303	54	316	295	60	0.733553	650	0.01	0.5	0.115	0.115395	598	0.01	0.5	0.111722	0.12332	114	0.01	0.44	0.116228	0.113445	0.143532	650	0	38	21.4354	8.1545	598	0	38	21.0033	8.10153	114	0
CXCL12_rs3780891	2	122	560	6	135	537	0.206195	3	141	574	5	116	523	0.540439	5	138	548	3	119	549	0.484061	8	0.01	0.35	0.09125	0.124721	257	0.01	0.49	0.108677	0.119202	1097	0.01	0.5	0.114995	0.118617	0.368605	8	11	29	22.125	5.84166	257	0	38	21.1362	8.19495	1097	0
CXCL12_rs4948878	641	42	1	644	34	0	0.377765	678	40	0	607	36	1	0.809355	645	46	0	640	30	1	0.0876652	1285	0.01	0.5	0.112848	0.11901	76	0.01	0.41	0.125658	0.113341	1	0.25	0.25	0.25		0.181692	1285	0	38	21.1611	8.08221	76	3	38	21.8158	8.09232	1	31
CYBA_rs3736112	9	161	514	18	155	505	0.211505	17	159	542	10	157	477	0.379162	18	163	510	9	153	509	0.226374	27	0.01	0.35	0.110741	0.105098	316	0.01	0.48	0.110918	0.115427	1019	0.01	0.5	0.114593	0.120135	0.994299	27	9	34	20.1111	5.94418	316	0	38	20.8228	7.90541	1019	0
CYBA_rs3794624	67	321	296	80	321	277	0.418523	80	354	284	67	288	289	0.13999	73	328	290	74	314	283	0.950265	147	0.01	0.5	0.113673	0.123	642	0.01	0.5	0.118037	0.12404	573	0.01	0.49	0.108761	0.111274	0.7574	147	2	38	21.4694	9.04502	642	0	38	21.19	7.80424	573	0
CYBA_rs4782390	263	334	87	256	312	110	0.173271	282	331	105	237	315	92	0.568726	264	323	104	255	323	93	0.78922	519	0.01	0.49	0.109595	0.110768	646	0.01	0.5	0.116455	0.123529	197	0.01	0.47	0.115228	0.123046	0.899066	519	0	38	21.1464	8.23694	646	1	38	21.2709	7.965	197	4
CYBA_rs8854	5	129	550	6	125	547	0.925167	6	136	576	5	118	521	0.948387	9	133	549	2	121	548	0.0974844	11	0.01	0.33	0.0990909	0.123406	254	0.01	0.49	0.106575	0.118123	1097	0.01	0.5	0.115451	0.118839	0.361871	11	0	36	19.9091	11.7427	254	2	38	21.0866	8.30641	1097	0
CYCS_rs10951046	34	202	448	32	233	413	0.160773	32	232	454	34	203	407	0.771315	37	223	431	29	212	430	0.621424	66	0.01	0.48	0.0934848	0.0975783	435	0.01	0.5	0.102713	0.10914	861	0.01	0.5	0.120743	0.124213	0.033229	66	5	38	21.2576	9.09998	435	0	38	20.4483	8.08189	861	0
CYP11B2_rs1799998	202	347	135	222	328	128	0.443048	219	356	143	205	319	120	0.787672	219	341	131	205	334	132	0.887894	424	0.01	0.5	0.110708	0.1171	675	0.01	0.48	0.11363	0.118305	263	0.01	0.5	0.118517	0.122567	0.680697	424	0	38	21.0519	8.18475	675	0	38	21.2889	8.04279	263	4
CYP11B2_rs3097	60	296	328	65	290	323	0.878985	66	297	355	59	289	296	0.397354	66	294	331	59	292	320	0.858311	125	0.01	0.48	0.1172	0.127346	586	0.01	0.5	0.109505	0.115013	651	0.01	0.5	0.116728	0.120336	0.566319	125	6	38	21.336	7.39108	586	0	38	20.8788	8.23401	651	0
CYP11B2_rs4545		19	665		27	651	0.233129		21	697		25	619	0.368742		21	670		25	646	0.549361						46	0.01	0.39	0.114565	0.110789	1316	0.01	0.5	0.113632	0.119018	0.555754						46	2	38	20.3478	7.96441	1316	0
CYP11B2_rs7844961	5	101	578	7	105	566	0.750158	8	113	597	4	93	547	0.500161	7	102	582	5	104	562	0.838235	12	0.01	0.41	0.126667	0.146432	206	0.01	0.48	0.108155	0.113221	1144	0.01	0.5	0.114519	0.119443	0.981914	12	9	27	16.3333	6.24257	206	0	38	21.3592	8.14725	1144	0
DAP13_rs10777666	97	329	258	91	311	276	0.534495	101	326	291	87	314	243	0.459434	100	318	273	88	322	261	0.687583	188	0.01	0.48	0.110106	0.116679	640	0.01	0.5	0.115469	0.118016	534	0.01	0.49	0.112753	0.12042	0.815703	188	0	38	21.8191	8.3755	640	0	38	21.1281	7.82671	534	0
DAP13_rs10859805	58	301	325	66	280	332	0.519714	73	295	350	51	286	307	0.240981	64	280	347	60	301	310	0.2616	124	0.01	0.49	0.111452	0.120862	581	0.01	0.49	0.118847	0.123608	657	0.01	0.5	0.109498	0.113787	0.741104	124	4	38	20.8952	8.16678	581	1	38	21.2978	8.35108	657	0
DAP13_rs1433321	14	176	494	20	185	473	0.433582	17	199	502	17	162	465	0.546641	19	184	488	15	177	479	0.821803	34	0.01	0.48	0.0976471	0.109103	361	0.01	0.5	0.104654	0.108464	967	0.01	0.5	0.11759	0.122511	0.350455	34	8	35	20.1765	6.82451	361	0	38	20.6205	8.23188	967	0
DCN_rs1013346	46	268	370	55	274	349	0.488099	44	288	386	57	254	333	0.158436	53	288	350	48	254	369	0.271149	101	0.01	0.49	0.102772	0.112304	542	0.01	0.5	0.114262	0.119882	719	0.01	0.5	0.114743	0.118782	0.618319	101	0	38	21.0693	8.33817	542	1	38	20.8708	8.00912	719	0
DCN_rs3138293	644	40		630	48		0.379067	672	46		602	42		1	637	54		637	34		0.0468059	1274	0.01	0.5	0.11398	0.11897	88	0.01	0.49	0.109091	0.115456						0.672683	1274	0	38	21.3163	8.05955	88	2	37	19.5909	8.2888
EDN1_rs10478698	649	35		637	41		0.480316	682	36		604	40		0.34666	656	35		630	41		0.411193	1286	0.01	0.5	0.115739	0.120525	76	0.01	0.3	0.0785526	0.0743093						0.028595	1286	0	38	21.2053	8.09178	76	4	36	21.1974	7.97834
EDN1_rs10478723	0	56	628	4	52	622	0.155728	1	55	662	3	53	588	0.514408	1	63	627	3	45	623	0.18453	4	0.01	0.07	0.0425	0.0275379	108	0.01	0.48	0.117407	0.117492	1250	0.01	0.5	0.113568	0.118971	0.373566	4	10	27	18.75	6.99405	108	0	38	22.3981	8.07088	1250	0
EDN1_rs1630736	152	346	186	142	343	193	0.794346	159	367	192	135	322	187	0.620016	148	358	185	146	331	194	0.610866	294	0.01	0.5	0.121463	0.129386	689	0.01	0.49	0.113353	0.117379	379	0.01	0.5	0.108179	0.112288	0.915497	294	1	38	21.2041	8.3002	689	0	38	21.5936	7.91839	379	0
EDN1_rs2248580	156	357	171	158	343	177	0.83333	167	372	179	147	328	169	0.864803	155	365	171	159	335	177	0.567797	314	0.01	0.5	0.114968	0.123674	700	0.01	0.49	0.114971	0.118569	348	0.01	0.5	0.109856	0.114616	0.574884	314	1	36	20.9809	8.16325	700	0	38	21.63	8.04753	348	0
EDN1_rs3087459	487	185	12	466	192	20	0.27646	498	207	13	455	170	19	0.262304	486	188	17	467	189	15	0.895941	953	0.01	0.5	0.114764	0.120398	377	0.01	0.49	0.112971	0.116055	32	0.01	0.41	0.0890625	0.0974964	0.564192	953	0	38	21.2938	8.088	377	0	38	21.1194	8.02284	32	0
EDN1_rs4714384	320	280	84	314	291	73	0.606079	335	298	85	299	273	72	0.916352	319	295	77	315	276	80	0.804334	634	0.01	0.5	0.118344	0.124229	571	0.01	0.48	0.108441	0.114209	157	0.01	0.49	0.113758	0.111697	0.461375	634	0	38	21.1909	8.18602	571	0	38	20.7005	8.00085	157	7
EDN1_rs5369	10	145	529	13	132	533	0.627805	12	150	556	11	127	506	0.858885	9	145	537	14	132	525	0.466262	23	0.01	0.43	0.0843478	0.11098	277	0.01	0.47	0.114513	0.116122	1062	0.01	0.5	0.114077	0.119561	0.309295	23	7	37	21.0435	8.61541	277	3	38	21.6534	8.05028	1062	0
EDN1_rs5370	23	245	416	33	222	423	0.227256	26	248	444	30	219	395	0.637406	26	233	432	30	234	407	0.687272	56	0.01	0.48	0.104821	0.106139	467	0.01	0.5	0.116424	0.119519	839	0.01	0.5	0.112718	0.119139	0.53809	56	0	36	19.6786	8.21995	467	0	38	21.1777	7.9335	839	0
EDN1_rs6912834	554	124	6	535	138	5	0.54199	575	138	5	514	124	6	0.912853	548	139	4	541	123	7	0.466494	1089	0.01	0.5	0.115142	0.119589	262	0.01	0.5	0.106718	0.114834	11	0.03	0.35	0.132727	0.126023	0.485023	1089	0	38	21.5142	8.08173	262	0	38	19.8588	7.95046	11	12
EDN1_rs9296344	617	66	1	600	73	5	0.207499	642	74	2	575	65	4	0.667974	618	72	1	599	67	5	0.269688	1217	0.01	0.5	0.115053	0.11993	139	0.01	0.47	0.104748	0.109003	6	0.01	0.07	0.0383333	0.022286	0.268888	1217	0	38	21.1742	8.11629	139	0	38	21.4748	7.88902	6	10
EDN1_rs9296345	6	115	563	8	112	558	0.875363	9	115	594	5	112	527	0.559295	5	122	564	9	105	557	0.35355	14	0.01	0.28	0.0821429	0.0821049	227	0.01	0.49	0.112555	0.115182	1121	0.01	0.5	0.114282	0.119818	0.793251	14	11	33	20.8571	7.45094	227	2	38	21.4053	8.20444	1121	0
EDNRA_rs10305863	630	51	3	615	61	2	0.577212	658	58	2	587	54	3	0.829907	632	56	3	613	56	2	0.975089	1245	0.01	0.5	0.114378	0.119298	112	0.01	0.49	0.106429	0.112441	5	0.01	0.32	0.098	0.126372	0.854352	1245	0	38	21.2972	8.03029	112	0	37	20.2857	8.68615	5	13
EDNRA_rs10305916	440	218	26	452	198	28	0.556948	463	227	28	429	189	26	0.667723	465	203	23	427	213	31	0.252084	892	0.01	0.5	0.11259	0.116775	416	0.01	0.5	0.116947	0.122954	54	0.01	0.45	0.106111	0.118726	0.448479	892	0	38	20.9877	8.07866	416	0	37	21.7356	8.0407	54	4
EDNRA_rs10305929		16	668		30	648	0.035996		19	699		27	617	0.133267		17	674		29	642	0.0710934						46	0.01	0.44	0.0891304	0.109784	1316	0.01	0.5	0.114521	0.118958	0.0291847						46	8	35	20.3261	8.46707	1316	0
EDNRA_rs2357924	468	197	19	463	195	20	0.987768	489	209	20	442	183	19	0.9515	471	204	16	460	188	23	0.427607	931	0.01	0.5	0.113169	0.117837	392	0.01	0.5	0.117372	0.121147	39	0.01	0.48	0.0882051	0.114314	0.0554285	931	0	38	21.2696	8.10239	392	0	38	21.0587	8.04362	39	1
EDNRA_rs4835412	8	133	543	10	146	522	0.530559	10	135	573	8	144	492	0.282221	9	133	549	9	146	516	0.503861	18	0.01	0.33	0.0938889	0.0942549	279	0.01	0.47	0.113978	0.11757	1065	0.01	0.5	0.113915	0.119439	0.845523	18	7	31	22.2778	7.90983	279	0	37	21.8208	7.74621	1065	0
EDNRA_rs5335	112	332	240	123	331	224	0.597061	116	359	243	119	304	221	0.444467	116	335	240	119	328	224	0.83354	235	0.01	0.49	0.114128	0.120478	663	0.01	0.5	0.115716	0.119424	464	0.01	0.49	0.110496	0.116965	0.443378	235	0	38	21.4298	8.22171	663	0	38	20.9442	7.97645	464	0
EDNRA_rs5343	74	313	297	76	314	288	0.929874	75	331	312	75	296	273	0.761451	74	323	294	76	304	291	0.851157	150	0.01	0.48	0.117067	0.120706	627	0.01	0.5	0.114912	0.119445	585	0.01	0.49	0.111453	0.117566	0.785251	150	0	37	20.2667	8.30676	627	0	38	21.5183	8.01522	585	0
EDNRA_rs6821368	32	212	440	40	225	413	0.351746	36	223	459	36	214	394	0.562152	31	215	445	41	222	408	0.243384	72	0.01	0.45	0.0975	0.101949	437	0.01	0.5	0.114279	0.118191	853	0.01	0.5	0.114713	0.120305	0.533552	72	0	35	21.1806	7.88174	437	0	38	21.0709	8.03073	853	1
EDNRA_rs6842241	13	178	493	15	172	491	0.900606	16	175	527	12	175	457	0.463644	15	176	500	13	174	484	0.941855	28	0.01	0.35	0.0928571	0.110012	350	0.01	0.49	0.118886	0.121059	984	0.01	0.5	0.112398	0.118119	0.156832	28	7	30	20.4286	6.74635	350	0	38	22.3686	8.00205	984	0
EDNRA_rs7677315	373	263	48	382	249	47	0.79302	395	270	53	360	242	42	0.823821	390	261	40	365	251	55	0.213334	755	0.01	0.5	0.111616	0.117162	512	0.01	0.5	0.116309	0.120911	95	0.01	0.45	0.115684	0.119926	0.549672	755	0	38	20.9536	8.1543	512	0	38	21.4727	8.00533	95	4
EDNRA_rs984458	70	271	343	70	285	323	0.629763	68	286	364	72	270	302	0.312386	82	277	332	58	279	334	0.150867	140	0.01	0.49	0.119643	0.125763	556	0.01	0.49	0.114101	0.118492	666	0.01	0.5	0.112042	0.117504	0.985348	140	4	36	21.9286	7.76141	556	0	38	21.1313	8.23259	666	2
FASLG_rs12041613	210	328	146	198	333	147	0.833508	213	351	154	195	310	139	0.955996	216	327	148	192	334	145	0.543437	408	0.01	0.49	0.117083	0.115646	661	0.01	0.5	0.110832	0.11956	293	0.01	0.5	0.11529	0.121225	0.319006	408	1	38	21.4265	7.84678	661	0	38	21.4463	8.06426	293	0
FASLG_rs2859242	117	352	215	128	325	225	0.410651	125	369	224	120	308	216	0.417643	122	347	222	123	330	218	0.913349	245	0.01	0.47	0.109918	0.113928	677	0.01	0.5	0.114815	0.119181	440	0.01	0.49	0.113977	0.120802	0.767456	245	0	38	20.4122	8.31436	677	4	38	21.3383	7.94745	440	1
FASLG_rs6700734	382	248	54	368	250	60	0.755673	391	259	68	359	239	46	0.305384	362	259	70	388	239	44	0.0254693	750	0.01	0.5	0.112173	0.118859	498	0.01	0.49	0.116285	0.119316	114	0.01	0.48	0.112018	0.115874	0.92112	750	0	38	21.0493	8.14482	498	0	38	21.3534	8.13119	114	3
FASLG_rs859663	6	120	558	3	125	550	0.601688	6	133	579	3	112	529	0.614159	5	124	562	4	121	546	1	9	0.01	0.22	0.0977778	0.0741245	245	0.01	0.49	0.115306	0.110162	1108	0.01	0.5	0.11343	0.120865	0.570521	9	6	38	23.8889	11.1181	245	0	38	20.8449	7.74229	1108	0
FAS_rs4934434	113	335	236	113	342	223	0.822099	121	358	239	105	319	220	0.929602	128	346	217	98	331	242	0.067814	226	0.01	0.49	0.11208	0.11718	677	0.01	0.5	0.11644	0.12193	459	0.01	0.5	0.110349	0.114735	0.697923	226	0	38	21.3761	8.26479	677	0	38	21.1374	8.07493	459	0
FAS_rs983751	17	156	511	14	173	491	0.474827	15	169	534	16	160	468	0.735083	15	159	517	16	170	485	0.561586	31	0.01	0.43	0.116774	0.126	329	0.01	0.49	0.102736	0.109159	1002	0.01	0.5	0.117156	0.121361	0.413049	31	6	34	20.2581	6.87492	329	0	38	20.6201	8.20089	1002	0
FCER1G_rs11421	498	163	23	484	181	13	0.150627	516	183	19	466	161	17	0.980009	495	173	23	487	171	13	0.283077	982	0.01	0.49	0.109511	0.115392	344	0.01	0.5	0.122267	0.126667	36	0.01	0.5	0.144722	0.123854	0.0537043	982	0	38	20.9369	8.16073	344	1	38	21.7936	7.82914	36	5
FCER1G_rs11587213	471	191	22	473	176	29	0.468914	503	190	25	441	177	26	0.760567	487	182	22	457	185	29	0.440767	944	0.01	0.5	0.115095	0.12027	367	0.01	0.49	0.111608	0.115666	51	0.01	0.41	0.101961	0.112446	0.768737	944	0	38	21.1515	8.09693	367	2	38	21.2398	8.0519	51	6
FLJ33167_rs2720379	44	276	364	64	279	335	0.0859942	51	295	372	57	260	327	0.496115	54	277	360	54	278	339	0.849644	108	0.01	0.43	0.0984259	0.110784	555	0.01	0.5	0.115279	0.120367	699	0.01	0.5	0.114735	0.118567	0.133963	108	0	38	20.6667	8.35766	555	0	38	21.1279	7.89575	699	2
FLJ33167_rs4647602	2	94	588	5	104	569	0.338784	5	104	609	2	94	548	0.671902	4	98	589	3	100	568	0.867681	7	0.01	0.1	0.0442857	0.0325869	198	0.01	0.48	0.111162	0.117673	1157	0.01	0.5	0.114512	0.119144	0.248847	7	9	30	20.4286	8.36375	198	0	38	20.8333	8.05801	1157	0
FLJ33167_rs4647603	9	168	507	11	176	491	0.745733	4	172	542	16	172	456	0.00438282	7	169	515	13	175	483	0.268669	20	0.01	0.38	0.118	0.117366	344	0.01	0.5	0.115814	0.121449	998	0.01	0.5	0.112836	0.117889	0.925866	20	5	37	18.65	9.67512	344	0	38	20.8983	8.0941	998	0
FLT1_rs10507385	360	277	47	369	266	43	0.787183	384	292	42	345	251	48	0.455057	387	268	36	342	275	54	0.0461169	729	0.01	0.49	0.109808	0.114125	543	0.01	0.5	0.115691	0.121048	90	0.01	0.49	0.132667	0.138635	0.91414	729	0	38	20.9945	7.82869	543	4	38	21.6169	8.26524	90	2
FLT1_rs12877031	9	128	547	8	142	528	0.573325	9	155	554	8	115	521	0.215016	6	130	555	11	140	520	0.277181	17	0.03	0.44	0.167647	0.130744	270	0.01	0.5	0.102704	0.104453	1075	0.01	0.5	0.115563	0.121617	0.0457537	17	8	36	19.4118	7.19426	270	1	38	21.3111	7.61379	1075	0
FLT1_rs1324057	68	293	323	59	276	343	0.42226	55	302	361	72	267	305	0.0778284	72	305	314	55	264	352	0.0290163	127	0.01	0.49	0.106535	0.11654	569	0.01	0.48	0.116819	0.119469	666	0.01	0.5	0.112327	0.118563	0.452083	127	1	36	21.1654	7.77436	569	0	38	21.3234	8.14552	666	0
FLT1_rs1408245	459	205	20	452	207	19	0.964073	486	212	20	425	200	19	0.801947	458	211	22	453	201	17	0.736928	911	0.01	0.49	0.111284	0.117191	412	0.01	0.5	0.119296	0.121215	39	0.01	0.49	0.109744	0.128155	0.7237	911	0	38	21.0735	8.11714	412	2	38	21.5995	8.10288	39	6
FLT1_rs1830792	459	210	15	489	168	21	0.0366369	497	201	20	451	177	16	0.907	480	196	15	468	182	21	0.511585	948	0.01	0.5	0.112331	0.116397	378	0.01	0.5	0.114762	0.122825	36	0.01	0.48	0.137222	0.135216	0.466537	948	0	38	21.1582	8.1299	378	0	38	21.2778	7.95609	36	1
FLT1_rs1853581	260	319	105	282	300	96	0.398511	295	323	100	247	296	101	0.495544	256	320	115	286	299	86	0.0436982	542	0.01	0.5	0.112657	0.120292	619	0.01	0.5	0.115719	0.118068	201	0.01	0.49	0.11005	0.116844	0.427976	542	0	38	21.0572	8.17137	619	0	38	21.4604	8.03389	201	1
FLT1_rs1924453	577	105	2	589	84	5	0.165129	629	87	2	537	102	5	0.0539873	583	103	5	583	86	2	0.293811	1166	0.01	0.5	0.113628	0.118678	189	0.01	0.49	0.111534	0.118368	7	0.03	0.35	0.177143	0.134253	0.355148	1166	0	38	21.3859	8.11221	189	0	38	20.0741	7.87636	7	8
FLT1_rs2182008		14	670		14	664	1		12	706		16	628	0.34085		13	678		15	656	0.704896						28	0.01	0.43	0.128929	0.136065	1334	0.01	0.5	0.113343	0.118357	0.85058						28	11	37	22.8571	7.34199	1334	0
FLT1_rs2281827	45	220	418	40	261	376	0.0499083	40	262	416	45	219	378	0.431069	49	230	412	36	251	382	0.159321	85	0.01	0.45	0.119647	0.122323	481	0.01	0.5	0.10736	0.111151	794	0.01	0.5	0.11699	0.122761	0.646876	85	0	38	20.5647	7.9559	481	0	38	21.1206	7.9182	794	0
FLT1_rs2296189	452	211	21	453	206	19	0.936217	469	224	25	436	193	15	0.371282	471	198	22	434	219	18	0.258809	905	0.01	0.5	0.119481	0.121224	417	0.01	0.49	0.104556	0.116	40	0.01	0.29	0.077	0.0676416	0.0339338	905	0	38	21.4983	8.09828	417	0	38	20.6139	8.18313	40	6
FLT1_rs2296192	0	68	616	1	47	630	0.0511662	0	63	655	1	52	591	0.623723	0	63	628	1	52	618	0.355568	1	0.03	0.03	0.03		115	0.01	0.47	0.123913	0.127008	1246	0.01	0.5	0.112785	0.11795	0.51342	1	13	13	13		115	6	37	23.0522	7.46553	1246	0
FLT1_rs2296285	77	309	298	71	311	296	0.894845	81	333	304	67	287	290	0.594946	75	324	292	73	296	302	0.553836	148	0.01	0.49	0.112703	0.116634	620	0.01	0.5	0.10721	0.113998	594	0.01	0.5	0.12064	0.123747	0.550604	148	1	36	21.6419	8.02039	620	0	38	21.1839	8.02551	594	0
FLT1_rs2387632	85	302	297	75	309	294	0.709972	71	319	328	89	292	263	0.0415395	85	325	281	75	286	310	0.121602	160	0.01	0.49	0.1095	0.121551	611	0.01	0.5	0.119509	0.123532	591	0.01	0.49	0.108748	0.112626	0.396166	160	0	38	20.5625	7.49145	611	2	38	21.4075	8.20251	591	0
FLT1_rs3751397	208	328	148	201	335	142	0.869198	207	368	143	202	295	147	0.125358	192	335	164	217	328	126	0.0432862	409	0.01	0.5	0.117702	0.122747	663	0.01	0.5	0.113363	0.116736	290	0.01	0.49	0.108655	0.117606	0.483481	409	0	38	21.3178	8.26946	663	2	38	21.1719	7.98586	290	0
FLT1_rs3751398	600	82	2	603	70	5	0.336491	642	75	1	561	77	6	0.0778279	599	87	5	604	65	2	0.114329	1203	0.01	0.5	0.112968	0.118349	152	0.01	0.49	0.116118	0.119114	7	0.01	0.43	0.18	0.167829	0.527469	1203	0	38	21.2635	8.15661	152	7	38	20.9474	7.35278	7	0
FLT1_rs3794399	12	134	538	3	110	565	0.015558	4	144	570	11	100	533	0.0137059	9	122	560	6	122	543	0.776737	15	0.01	0.35	0.127333	0.107602	244	0.01	0.49	0.116189	0.12452	1103	0.01	0.5	0.112919	0.117617	0.700424	15	12	37	23.0667	7.34328	244	1	38	21.5164	7.88	1103	0
FLT1_rs3794400	26	182	476	23	168	487	0.660557	23	162	533	26	188	430	0.0103309	26	190	475	23	160	488	0.262038	49	0.01	0.47	0.112653	0.13252	350	0.01	0.49	0.115029	0.122094	963	0.01	0.5	0.113219	0.116842	0.91639	49	0	38	19.102	7.72778	350	4	37	21.4686	8.01202	963	0
FLT1_rs3794405	448	204	32	401	245	32	0.0430741	453	238	27	396	211	37	0.223134	433	219	39	416	230	25	0.186701	849	0.01	0.5	0.115948	0.119651	449	0.01	0.5	0.106592	0.115268	64	0.01	0.45	0.132969	0.128244	0.178512	849	0	38	21.3581	8.21046	449	0	38	20.98	7.88913	64	0
FLT1_rs4771240	673	11		656	22		0.0537063	702	16		627	17		0.724786	672	19		657	14		0.483057	1329	0.01	0.5	0.11459	0.119336	33	0.01	0.31	0.0763636	0.0829841						0.141492	1329	0	38	21.2528	8.11073	33	0	32	19.2727	6.67211
FLT1_rs622227	477	193	14	499	162	17	0.17648	510	193	15	466	162	16	0.719917	480	190	21	496	165	10	0.0605729	976	0.01	0.5	0.111875	0.118663	355	0.01	0.49	0.115099	0.114357	31	0.01	0.47	0.153548	0.160011	0.235632	976	0	38	20.96	8.08363	355	0	38	22.0366	8.07775	31	0
FLT1_rs664393	7	154	523	8	113	557	0.023163	11	125	582	4	142	498	0.0329314	7	143	541	8	124	539	0.558655	15	0.01	0.39	0.14	0.138564	267	0.01	0.49	0.114382	0.115198	1080	0.01	0.5	0.11312	0.119351	0.540586	15	8	34	21.3333	8.90158	267	0	38	22.0037	7.80905	1080	0
FLT1_rs670084	3	137	544	4	109	565	0.148696	3	141	574	4	105	535	0.254843	3	135	553	4	111	556	0.317651	7	0.03	0.4	0.125714	0.145815	246	0.01	0.47	0.121179	0.120857	1109	0.01	0.5	0.111921	0.118105	0.317069	7	14	33	24.1429	6.69399	246	3	38	22.3211	8.23225	1109	0
FLT1_rs722503	405	230	49	356	279	43	0.0161669	398	278	42	363	231	50	0.272591	396	242	53	365	267	39	0.114497	761	0.01	0.5	0.117227	0.122469	509	0.01	0.5	0.105992	0.111444	92	0.01	0.45	0.12663	0.124753	0.195841	761	0	38	21.3259	8.23864	509	0	38	21.0766	7.87001	92	0
FLT1_rs7330109	77	299	308	67	297	314	0.693643	72	319	327	72	277	295	0.741351	59	298	334	85	298	288	0.0202116	144	0.01	0.49	0.121458	0.127076	596	0.01	0.5	0.114195	0.119159	622	0.01	0.49	0.11135	0.116372	0.974815	144	2	38	21.0417	8.93792	596	2	38	21.2466	8.1119	622	0
FLT1_rs748253	85	320	279	84	317	277	1	93	332	293	76	305	263	0.803515	82	331	278	87	306	278	0.660106	169	0.01	0.49	0.10568	0.109614	637	0.01	0.5	0.107473	0.113862	556	0.01	0.5	0.123183	0.126135	0.300137	169	1	36	20.7633	8.09487	637	0	38	21.4835	7.97708	556	0
FLT1_rs7982283	30	208	446	25	200	453	0.723972	26	226	466	29	182	433	0.344108	30	218	443	25	190	456	0.315356	55	0.01	0.45	0.106182	0.105453	408	0.01	0.5	0.115539	0.118857	899	0.01	0.5	0.11327	0.119505	0.634437	55	3	37	21.2364	8.62375	408	0	38	21.3603	8.17349	899	0
FLT1_rs7982639	408	235	41	408	229	41	0.979222	423	246	49	393	218	33	0.386952	417	230	44	399	234	38	0.757697	816	0.01	0.49	0.115245	0.121624	464	0.01	0.5	0.110388	0.11393	82	0.01	0.45	0.116463	0.116877	0.824044	816	0	38	21.3235	8.18577	464	0	38	20.8707	7.88418	82	1
FLT1_rs7993594	33	258	393	41	253	384	0.619175	41	276	401	33	235	376	0.629359	31	270	390	43	241	387	0.192337	74	0.01	0.39	0.0893243	0.0848743	511	0.01	0.5	0.109883	0.117743	777	0.01	0.5	0.118468	0.121811	0.271381	74	2	36	20.2703	8.35726	511	1	38	21.3288	7.99764	777	0
FLT1_rs7995976	47	259	377	50	251	377	0.908563	53	259	405	44	251	349	0.542512	53	261	377	44	249	377	0.681415	97	0.01	0.49	0.111443	0.117995	510	0.01	0.5	0.110882	0.115331	754	0.01	0.5	0.115875	0.121213	0.720544	97	2	38	20.268	8.17455	510	1	38	21.7333	8.02791	754	0
FLT1_rs7999615	0	93	591	1	75	602	0.161894	0	104	614	1	64	579	0.0104867	0	90	601	1	78	592	0.434378	1	0.03	0.03	0.03		168	0.01	0.47	0.120714	0.121815	1193	0.01	0.5	0.112741	0.118311	0.455227	1	29	29	29		168	6	38	22.2917	8.05695	1193	0
FLT1_rs9319425	181	353	150	200	325	152	0.351167	195	368	155	186	310	147	0.533405	191	345	155	190	333	147	0.948301	381	0.01	0.5	0.115013	0.118616	678	0.01	0.5	0.116268	0.121264	302	0.01	0.47	0.106391	0.11309	0.765787	381	0	38	21.1942	8.03342	678	0	38	21.1667	8.22865	302	3
FLT1_rs9319427	135	352	197	125	352	201	0.822799	127	382	209	133	322	189	0.32816	150	347	194	110	357	204	0.0439856	260	0.01	0.49	0.109654	0.115298	704	0.01	0.5	0.113196	0.117625	398	0.01	0.5	0.117111	0.122946	0.927581	260	0	36	21.2962	7.72105	704	2	38	21.2543	8.08573	398	0
FLT1_rs9319429	47	295	342	51	295	332	0.867086	52	313	353	46	277	321	0.970335	59	291	341	39	299	333	0.136705	98	0.01	0.49	0.107041	0.114848	590	0.01	0.5	0.109525	0.115041	674	0.01	0.5	0.118249	0.122362	0.616832	98	1	36	21.3469	8.05791	590	1	38	21.4034	7.92644	674	0
FLT1_rs942364	13	132	539	10	121	547	0.652338	10	118	590	13	135	496	0.0563183	11	139	541	12	114	545	0.325303	23	0.03	0.47	0.167826	0.15664	253	0.01	0.49	0.111581	0.121925	1086	0.01	0.5	0.113002	0.11689	0.102807	23	8	38	21.6087	7.62018	253	0	37	20.8142	8.35955	1086	0
FLT1_rs9513085	441	218	25	437	215	26	0.989471	469	222	27	409	211	24	0.757837	432	230	29	446	203	22	0.278422	878	0.01	0.5	0.114943	0.119966	433	0.01	0.5	0.112032	0.116088	51	0.01	0.49	0.10549	0.120836	0.549205	878	0	38	21.1287	8.08679	433	1	38	21.5127	8.08465	51	2
FLT1_rs9551462	72	301	311	84	309	285	0.346829	82	329	307	74	281	289	0.698295	90	305	296	66	305	300	0.178898	156	0.01	0.49	0.110513	0.118957	610	0.01	0.5	0.105918	0.111573	596	0.01	0.49	0.122416	0.125164	0.155577	156	1	38	20.8333	8.24295	610	1	38	21.2148	7.95233	596	0
FLT4_rs10516142		45	639		39	639	0.573875		45	673		39	605	0.910474		41	650		43	628	0.736513						84	0.01	0.48	0.112024	0.114205	1278	0.01	0.5	0.113772	0.119044	0.909898						84	0	36	20.9643	8.46601	1278	0
FLT4_rs186288	542	128	11	521	148	8	0.323628	563	145	9	500	131	10	0.889422	531	149	9	532	127	10	0.464871	1063	0.01	0.5	0.115136	0.119818	276	0.01	0.5	0.106377	0.114396	19	0.01	0.39	0.124737	0.11012	0.140851	1063	0	38	21.3443	8.04273	276	3	38	20.4312	8.23114	19	8
FLT4_rs2279622	5	84	595	7	68	603	0.347241	5	80	633	7	72	565	0.778463	5	82	604	7	70	594	0.605665	12	0.03	0.34	0.13	0.112331	152	0.01	0.49	0.111118	0.120135	1198	0.01	0.5	0.113823	0.118672	0.484675	12	6	35	22.9167	9.37558	152	3	38	21.8224	8.05042	1198	0
FLT4_rs2290985	599	82	3	592	83	3	0.97928	629	85	4	562	80	2	0.779473	611	78	2	580	87	4	0.443855	1191	0.01	0.5	0.114148	0.118571	165	0.01	0.49	0.111939	0.121449	6	0.02	0.15	0.065	0.0554076	0.642138	1191	0	38	21.0764	8.11555	165	4	37	22.3333	7.81675	6	10
FLT4_rs307805	519	147	18	517	153	8	0.144069	548	156	14	488	144	12	0.959888	518	162	11	518	138	15	0.329509	1036	0.01	0.5	0.113311	0.119821	300	0.01	0.48	0.1153	0.116488	26	0.01	0.39	0.108846	0.102228	0.933965	1036	0	38	21.251	8.09119	300	0	38	20.8767	8.08782	26	9
FLT4_rs307806	18	165	501	15	175	488	0.724436	15	181	522	18	159	467	0.699231	17	175	499	16	165	490	0.945579	33	0.01	0.39	0.0939394	0.0932047	340	0.01	0.5	0.112176	0.116927	989	0.01	0.5	0.114833	0.120104	0.635597	33	8	32	20.6667	7.79289	340	0	38	20.7794	8.29551	989	0
FLT4_rs307811	82	321	281	105	293	280	0.130915	102	324	292	85	290	269	0.841268	92	313	286	95	301	275	0.905394	187	0.01	0.5	0.127754	0.128638	614	0.01	0.49	0.11228	0.117762	561	0.01	0.5	0.110481	0.116165	0.126516	187	1	38	20.7807	8.16892	614	0	38	21.2899	8.05835	561	0
FLT4_rs307823	439	219	26	451	210	17	0.331838	455	236	27	435	193	16	0.168919	463	205	23	427	224	20	0.333484	890	0.01	0.49	0.113045	0.118139	429	0.01	0.5	0.113753	0.120028	43	0.01	0.48	0.125581	0.119469	0.504437	890	0	38	21.1135	8.04609	429	1	38	21.4289	8.24438	43	6
FLT4_rs3797104	528	148	8	530	138	9	0.848611	537	170	10	521	116	7	0.026533	547	134	10	511	152	7	0.287424	1058	0.01	0.49	0.111446	0.117656	286	0.01	0.5	0.122028	0.121569	17	0.01	0.48	0.115882	0.137707	0.397087	1058	0	38	21.0709	8.10817	286	1	38	21.6958	8.00406	17	6
FLT4_rs382266	4	90	590	4	70	604	0.238732	4	80	634	4	80	560	0.757222	2	80	609	6	80	585	0.355276	8	0.03	0.34	0.1625	0.118773	160	0.01	0.49	0.11	0.114117	1194	0.01	0.5	0.113827	0.119334	0.257667	8	12	35	23.125	9.17197	160	3	38	21.675	8.08411	1194	0
FLT4_rs400330	287	325	72	294	310	74	0.799646	312	329	77	269	306	69	0.806751	300	323	68	281	312	78	0.544904	581	0.01	0.5	0.1158	0.122611	635	0.01	0.49	0.113118	0.11575	146	0.01	0.45	0.107534	0.11619	0.79719	581	0	38	21.4303	8.06209	635	1	38	20.8614	8.01908	146	0
FLT4_rs6889643	87	317	280	92	295	291	0.572556	96	313	309	83	299	262	0.575127	98	300	293	81	312	278	0.378985	179	0.01	0.49	0.111341	0.117604	612	0.01	0.49	0.106993	0.116057	571	0.01	0.5	0.121541	0.121572	0.117071	179	0	38	19.6704	8.02368	612	0	38	21.3513	8.00281	571	0
FN1_rs10498037	2	80	602	6	101	571	0.0716782	6	97	615	2	84	558	0.451352	4	101	586	4	80	587	0.330856	8	0.03	0.16	0.06875	0.0559177	181	0.01	0.49	0.112983	0.125122	1173	0.01	0.5	0.114075	0.118016	0.627457	8	9	32	22.125	6.91659	181	0	36	20.0497	7.95283	1173	0
FN1_rs10498038	607	76	1	602	73	3	0.666262	650	68	0	559	81	4	0.0126168	615	75	1	594	74	3	0.665845	1209	0.01	0.5	0.115087	0.119792	149	0.01	0.5	0.10255	0.109305	4	0.03	0.3	0.0975	0.135	0.733732	1209	0	38	21.196	8.05664	149	0	38	21.094	8.2694	4	18
FN1_rs1250215	274	314	96	261	328	89	0.658457	274	344	100	261	298	85	0.667536	270	319	102	265	323	83	0.422137	535	0.01	0.5	0.108785	0.115693	642	0.01	0.5	0.115312	0.117752	185	0.01	0.49	0.122054	0.130151	0.295172	535	0	38	20.9234	8.31967	642	0	38	21.1978	7.85098	185	4
FN1_rs1250248	56	279	303	53	259	324	0.469718	50	287	337	59	251	290	0.304358	59	260	323	50	278	304	0.404398	109	0.01	0.49	0.130367	0.126885	538	0.01	0.5	0.11158	0.117878	627	0.01	0.49	0.113892	0.117971	0.16138	109	6	36	21.5046	7.70356	538	0	38	21.3457	8.23669	627	0
FN1_rs1250264	647	37		638	40		0.725859	678	40		607	37		0.906929	651	40		634	37		0.906695	1285	0.01	0.5	0.114576	0.119989	77	0.01	0.35	0.0984416	0.0942151						0.447514	1285	0	38	21.1619	8.08196	77	1	35	21.9221	8.11231
FN1_rs1263	90	322	272	105	301	272	0.401659	102	321	295	93	302	249	0.651662	105	316	270	90	307	274	0.598295	195	0.01	0.48	0.110769	0.118452	623	0.01	0.49	0.117047	0.122131	544	0.01	0.5	0.110827	0.114884	0.553376	195	0	38	21.1077	7.87163	623	0	38	21.2424	8.01329	544	0
FN1_rs13004592	217	337	130	229	332	117	0.601585	243	342	133	203	327	114	0.50543	236	331	124	210	338	123	0.524601	446	0.01	0.49	0.114753	0.119951	669	0.01	0.5	0.109357	0.115694	247	0.01	0.49	0.12336	0.124279	0.370332	446	1	38	21.4439	8.08468	669	0	38	20.8879	8.01071	247	0
FN1_rs13652	533	145	6	517	150	11	0.414699	546	163	9	504	132	8	0.616439	529	155	7	521	140	10	0.589779	1050	0.01	0.5	0.114333	0.118954	295	0.01	0.49	0.113186	0.118204	17	0.01	0.35	0.0805882	0.114372	0.0816055	1050	0	38	21.1371	8.10902	295	0	38	21.4983	7.96458	17	4
FN1_rs1437798		25	659		29	649	0.581051		26	692		28	616	0.578407		29	662		25	646	0.679198						54	0.01	0.35	0.0874074	0.0858297	1308	0.01	0.5	0.114748	0.119775	0.201559						54	1	35	21.5926	8.11827	1308	0
FN1_rs1968510	4	108	572	7	128	543	0.19362	7	127	584	4	109	531	0.722167	5	124	562	6	112	553	0.793227	11	0.01	0.35	0.112727	0.132747	236	0.01	0.49	0.111102	0.117703	1115	0.01	0.5	0.114215	0.118888	0.712568	11	6	29	18.9091	7.86708	236	0	36	21.1907	7.90379	1115	0
FN1_rs2289199	47	252	385	38	257	382	0.61643	44	273	401	41	236	366	0.881391	48	256	386	37	253	381	0.558972	85	0.01	0.49	0.132706	0.134274	509	0.01	0.5	0.116798	0.120586	767	0.01	0.5	0.109583	0.115523	0.0760332	85	8	38	22.0235	8.06665	509	0	38	21.4283	7.8498	767	0
FN1_rs2289200	63	286	335	66	256	356	0.307972	64	281	373	65	261	318	0.579881	64	282	345	65	260	346	0.73808	129	0.01	0.48	0.115271	0.123681	542	0.01	0.49	0.116125	0.119257	691	0.01	0.5	0.111433	0.117463	0.562256	129	6	38	22.2171	7.66787	542	0	38	21.1236	8.07047	691	0
FN1_rs2289202	41	241	402	40	237	401	0.991651	41	250	427	40	228	376	0.888761	46	242	403	35	236	400	0.532418	81	0.01	0.44	0.103333	0.120229	478	0.01	0.5	0.114644	0.116032	803	0.01	0.5	0.114122	0.120223	0.20737	81	1	36	21.321	8.89779	478	1	38	21.2741	8.18152	803	0
FN1_rs3817500	297	308	79	317	281	80	0.396579	323	304	91	291	285	68	0.457568	312	300	79	302	289	80	0.960613	614	0.01	0.49	0.11373	0.11762	589	0.01	0.5	0.116876	0.122763	159	0.01	0.47	0.101509	0.106967	0.601612	614	0	38	21.0358	8.07239	589	0	38	21.3837	8.15426	159	0
FN1_rs6725921	339	292	53	345	267	66	0.276137	356	299	63	328	260	56	0.882133	357	271	63	327	288	56	0.384203	684	0.01	0.49	0.113406	0.120764	559	0.01	0.5	0.113453	0.115957	119	0.01	0.45	0.116134	0.120564	0.888955	684	0	38	21.3056	7.91658	559	1	38	21.0841	8.22892	119	2
FN1_rs6744921	230	334	120	250	321	107	0.402148	264	329	125	216	326	102	0.208801	251	322	118	229	333	109	0.536739	480	0.01	0.49	0.113083	0.118437	655	0.01	0.5	0.110336	0.116535	227	0.01	0.49	0.124493	0.125243	0.404125	480	1	38	21.45	8.11849	655	0	38	20.8794	7.9649	227	0
FN1_rs7575234	49	245	390	42	265	371	0.421386	50	272	396	41	238	365	0.833646	53	250	388	38	260	373	0.264302	91	0.01	0.48	0.123077	0.123789	510	0.01	0.5	0.111255	0.116695	761	0.01	0.5	0.114152	0.119527	0.607718	91	2	38	22.1868	8.34388	510	0	38	21.1235	7.71919	761	0
GAPDH_rs2240871	452	209	23	458	193	27	0.611126	476	216	26	434	186	24	0.886606	454	215	22	456	187	28	0.311316	910	0.01	0.5	0.117231	0.122171	402	0.01	0.49	0.109627	0.112634	50	0.01	0.39	0.0812	0.09627	0.130906	910	0	38	20.856	8.10018	402	0	38	21.908	7.84952	50	8
GAPDH_rs3741916	40	271	371	48	275	354	0.57388	51	292	373	37	254	352	0.460467	43	282	364	45	264	361	0.820239	88	0.01	0.44	0.100682	0.117099	546	0.01	0.5	0.106758	0.111728	725	0.01	0.5	0.120083	0.123423	0.0804889	88	1	38	21.4773	8.59695	546	0	38	21.2802	8.06739	725	0
GDF9_rs10491279	14	212	458	22	173	483	0.0404871	24	195	499	12	190	442	0.17418	18	194	479	18	191	462	0.987162	36	0.01	0.38	0.105	0.122486	385	0.01	0.5	0.116805	0.119246	941	0.01	0.5	0.11271	0.118442	0.35013	36	4	38	20.2222	9.06204	385	2	38	21.787	7.77291	941	0
GDF9_rs254285	6	114	564	7	128	543	0.515983	7	123	588	6	119	519	0.790924	5	121	565	8	121	542	0.641602	13	0.01	0.13	0.0492308	0.0432939	242	0.01	0.49	0.109008	0.117413	1107	0.01	0.5	0.115438	0.119417	0.0923387	13	10	28	21.4615	5.12535	242	0	37	21.0289	7.95235	1107	0
GDF9_rs39830	230	340	114	233	317	128	0.442541	247	337	134	216	320	108	0.526368	235	334	122	228	323	120	0.994548	463	0.01	0.49	0.113996	0.11831	657	0.01	0.5	0.114779	0.120052	242	0.01	0.5	0.11	0.116202	0.932407	463	0	38	20.8855	8.21873	657	2	38	21.519	8.09321	242	0
GDF9_rs4705974	12	171	501	15	174	489	0.776462	16	182	520	11	163	470	0.800215	15	175	501	12	170	489	0.8982	27	0.01	0.38	0.114074	0.104486	345	0.01	0.5	0.119478	0.123487	990	0.01	0.49	0.111626	0.117413	0.611206	27	2	35	19.4074	7.76213	345	0	37	21.4464	8.22243	990	0
GTPBP4_rs7918118	336	279	69	330	288	60	0.672749	355	308	55	311	259	74	0.0512709	329	289	73	337	278	56	0.326318	666	0.01	0.5	0.108739	0.113139	567	0.01	0.5	0.11746	0.122667	129	0.01	0.48	0.122403	0.128585	0.777387	666	0	38	21.2267	8.12244	567	0	38	21.1834	7.9771	129	4
GTPPB4_rs10904588	232	333	119	230	326	122	0.957143	244	337	137	218	322	104	0.317005	232	341	118	230	318	123	0.739852	462	0.01	0.49	0.113701	0.120742	659	0.01	0.5	0.113217	0.11618	241	0.01	0.5	0.114813	0.122079	0.907379	462	1	38	21.474	8.21659	659	0	38	21.1108	8.06178	241	0
GTPPB4_rs12242982	1	53	630	0	64	614	0.287967	1	70	647	0	47	597	0.121199	0	57	634	1	60	610	0.629591	1	0.13	0.13	0.13		117	0.01	0.47	0.112906	0.116649	1244	0.01	0.5	0.113722	0.118996	0.786828	1	13	13	13		117	4	38	20.7607	7.85938	1244	0
GTPPB4_rs7069123	156	351	177	169	328	180	0.526098	164	358	196	161	321	161	0.512721	166	348	176	159	331	181	0.831153	325	0.01	0.5	0.115508	0.122787	679	0.01	0.5	0.114507	0.117436	357	0.01	0.49	0.110672	0.117665	0.736369	325	0	38	21.2985	8.05767	679	0	38	21.1016	8.03036	357	1
HF1_rs1061170	279	301	104	275	303	100	0.955598	282	327	109	272	277	95	0.537509	283	306	102	271	298	102	0.963777	554	0.01	0.5	0.109838	0.112963	604	0.01	0.48	0.118924	0.125943	204	0.01	0.49	0.10848	0.111595	0.913925	554	0	38	20.7744	8.12079	604	0	38	21.293	8.1317	204	5
HGF_rs1800793	33	246	405	25	228	425	0.323372	33	246	439	25	228	391	0.759721	31	251	409	27	223	421	0.40138	58	0.01	0.47	0.159655	0.138855	474	0.01	0.5	0.114979	0.119616	830	0.01	0.5	0.109699	0.116111	0.0230169	58	5	36	22.6897	8.18472	474	0	38	21.4662	8.03138	830	0
HGF_rs2286194	475	194	15	431	221	26	0.0330618	478	219	21	428	196	20	0.982329	461	214	16	445	201	25	0.310634	906	0.01	0.5	0.117881	0.121514	415	0.01	0.49	0.107687	0.114045	41	0.01	0.41	0.0809756	0.09452	0.144895	906	0	38	21.415	8.08573	415	0	38	20.7759	8.07216	41	6
HGF_rs5745616	39	249	396	42	228	408	0.54837	52	237	429	29	240	375	0.0447753	35	242	414	46	235	390	0.36759	81	0.01	0.45	0.0908642	0.104154	477	0.01	0.5	0.116415	0.119245	804	0.01	0.5	0.114328	0.119658	0.17063	81	4	37	20.963	8.65223	477	0	38	21.3564	7.90615	804	0
HGF_rs5745635	669	14	1	664	14	0	1	701	16	1	632	12	0	0.84416	679	12	0	654	16	1	0.393855	1333	0.01	0.5	0.113346	0.118188	28	0.01	0.45	0.126429	0.144612	1	0.18	0.18	0.18		0.64598	1333	0	38	21.1725	8.04717	28	2	37	22.3214	9.58414	1	33
HGF_rs5745678	42	266	376	38	251	389	0.656734	46	266	406	34	251	359	0.580862	48	272	371	32	245	394	0.0809231	80	0.01	0.48	0.145375	0.138198	517	0.01	0.5	0.110135	0.114237	765	0.01	0.5	0.112732	0.119167	0.125618	80	5	37	21.65	8.36524	517	0	38	21.3308	8.04137	765	0
HGF_rs5745690	376	266	42	389	251	38	0.656734	406	266	46	359	251	34	0.580862	371	272	48	394	245	32	0.0809231	765	0.01	0.5	0.112732	0.119167	517	0.01	0.5	0.110135	0.114237	80	0.01	0.48	0.145375	0.138198	0.125618	765	0	38	21.0732	8.08818	517	0	38	21.3308	8.04137	80	5
HGF_rs5745696	4	74	606	5	99	574	0.097025	3	93	622	6	80	558	0.497744	3	85	603	6	88	577	0.517252	9	0.01	0.34	0.0711111	0.105172	173	0.01	0.49	0.111734	0.11752	1180	0.01	0.5	0.114271	0.119009	0.240483	9	9	33	20	7.64853	173	0	38	20.0347	8.31355	1180	0
HGF_rs5745725	592	92	0	607	69	2	0.0470843	630	87	1	569	74	1	0.868967	616	74	1	583	87	1	0.426084	1199	0.01	0.5	0.111359	0.117196	161	0.01	0.49	0.130621	0.128747	2	0.03	0.23	0.13	0.141421	0.335942	1199	0	38	21.2002	8.11921	161	3	37	21.3354	7.83098	2	12
HGF_rs5745745	7	98	579	4	93	581	0.654516	8	107	603	3	84	557	0.256087	8	101	582	3	90	578	0.275514	11	0.02	0.19	0.0745455	0.055383	191	0.01	0.49	0.103089	0.107402	1160	0.01	0.5	0.115776	0.120804	0.760539	11	11	31	22.6364	5.4822	191	0	38	22.0157	7.9389	1160	0
HIF1A_rs11847020	618	63	3	614	63	1	0.755925	654	62	2	578	64	2	0.715184	632	58	1	600	68	3	0.306414	1232	0.01	0.5	0.114099	0.118985	126	0.01	0.45	0.111508	0.117719	4	0.03	0.07	0.0475	0.0206155	0.721342	1232	0	38	21.1477	8.11128	126	6	37	21.8651	7.83362	4	13
HIF1A_rs1319462	481	181	22	487	179	12	0.231728	500	203	15	468	157	19	0.178836	497	181	13	471	179	21	0.321219	968	0.01	0.5	0.114452	0.119865	360	0.01	0.5	0.113611	0.118038	34	0.01	0.38	0.0917647	0.089999	0.874822	968	0	38	21.0176	8.1775	360	1	38	21.7222	7.94203	34	9
HIF1A_rs1951795	29	213	442	19	212	447	0.359702	20	236	462	28	189	427	0.145291	17	210	464	31	215	425	0.0612921	48	0.01	0.38	0.0885417	0.0918831	425	0.01	0.5	0.117671	0.121039	889	0.01	0.5	0.113105	0.118804	0.292718	48	11	36	21.8125	6.24212	425	1	38	21.8235	7.94435	889	0
HIF1A_rs2301106	523	146	15	517	151	10	0.595596	536	170	12	504	127	13	0.19528	540	142	9	500	155	16	0.150978	1040	0.01	0.5	0.114673	0.119706	297	0.01	0.5	0.112997	0.11789	25	0.01	0.38	0.0796	0.0783411	0.683986	1040	0	38	20.9923	8.14498	297	1	38	21.9966	7.94597	25	9
HIF1A_rs3783752	5	91	588	2	81	595	0.373069	3	86	629	4	86	554	0.656537	4	81	606	3	91	577	0.598699	7	0.03	0.11	0.0514286	0.0307834	172	0.01	0.45	0.118314	0.12167	1183	0.01	0.5	0.113356	0.118549	0.61652	7	12	29	19.8571	7.60326	172	6	37	21.6221	7.95177	1183	0
HIF1A_rs966824	3	50	631	0	52	625	0.330908	1	55	662	2	47	594	0.787167	3	56	632	0	46	624	0.169661	3	0.03	0.11	0.0833333	0.046188	102	0.01	0.48	0.123529	0.124062	1256	0.01	0.5	0.113002	0.118425	0.75308	3	12	26	20.6667	7.57188	102	7	37	21.5196	7.48957	1256	0
HMGCR_rs17238463	36	254	394	38	237	403	0.699846	39	254	425	35	237	372	0.854696	44	243	404	30	248	393	0.275484	74	0.01	0.39	0.0951351	0.102225	491	0.01	0.49	0.116904	0.119498	797	0.01	0.5	0.113388	0.119615	0.308551	74	5	37	21.0676	8.16664	491	0	38	21.3259	7.89832	797	0
HMGCR_rs17238505	217	333	134	227	325	126	0.761969	223	368	127	221	290	133	0.0672131	241	324	126	203	334	134	0.185708	444	0.01	0.5	0.11759	0.123128	658	0.01	0.5	0.112492	0.116547	260	0.01	0.49	0.109923	0.116712	0.775447	444	1	38	20.777	7.99844	658	0	38	21.6565	8.06937	260	2
HMGCR_rs17238540	646	38		649	29		0.31653	689	29		606	38		0.131957	653	38		642	29		0.319872	1295	0.01	0.5	0.112247	0.118101	67	0.01	0.48	0.141045	0.127827						0.0536027	1295	0	38	21.19	8.05484	67	3	38	21.4925	8.66091
HMGCR_rs17238561	533	145	6	546	125	7	0.454226	567	144	7	512	126	6	0.964725	540	140	11	539	130	2	0.0415799	1079	0.01	0.5	0.112382	0.118806	270	0.01	0.48	0.121296	0.119501	13	0.01	0.25	0.0615385	0.0761409	0.041372	1079	0	38	21.0278	8.07474	270	0	38	22.0259	8.06683	13	8
HMGCR_rs17244820	8	119	557	6	115	557	0.855966	7	130	581	7	104	533	0.59987	6	102	583	8	132	531	0.0425336	14	0.03	0.33	0.0971429	0.100187	234	0.01	0.49	0.10312	0.114839	1114	0.01	0.5	0.116086	0.119673	0.172225	14	8	36	24.2857	8.27813	234	3	38	21.5983	8.50202	1114	0
HMGCR_rs17244911	110	304	270	97	305	276	0.647077	101	339	278	106	270	268	0.126981	99	303	289	108	306	257	0.372596	207	0.01	0.49	0.105942	0.113975	609	0.01	0.5	0.111872	0.116293	546	0.01	0.5	0.11859	0.12306	0.491725	207	2	37	20.5266	8.21661	609	0	38	21.7504	8.07551	546	1
HPSE_rs10001403	637	46	1	631	46	1	1	669	48	1	599	44	1	0.957296	637	54	0	631	38	2	0.0847967	1268	0.01	0.5	0.112571	0.117347	92	0.01	0.5	0.126739	0.136463	2	0.16	0.25	0.205	0.0636396	0.340501	1268	0	38	21.1278	8.07186	92	1	37	22.1413	8.20959	2	21
HPSE_rs12509763	562	117	5	573	101	4	0.476731	591	121	6	544	97	3	0.460756	571	118	2	564	100	7	0.131999	1135	0.01	0.5	0.113938	0.118312	218	0.01	0.48	0.113991	0.122422	9	0.01	0.21	0.0711111	0.0684552	0.641888	1135	0	38	21.3154	7.95141	218	0	38	20.7798	8.6986	9	4
HPSE_rs4328905	528	145	11	532	137	9	0.795601	548	159	11	512	123	9	0.365079	528	148	15	532	134	5	0.0662015	1060	0.01	0.5	0.111377	0.116728	282	0.01	0.5	0.121206	0.12617	20	0.01	0.39	0.1285	0.11495	0.743221	1060	0	38	21.0368	8.12994	282	0	38	21.8298	7.91544	20	9
HPSE_rs4364254	335	290	59	344	281	53	0.763211	356	304	58	323	267	54	0.937834	351	281	59	328	290	53	0.625291	679	0.01	0.5	0.111517	0.117047	571	0.01	0.49	0.112855	0.119937	112	0.01	0.45	0.130804	0.122115	0.174477	679	0	38	20.9146	8.14227	571	0	38	21.5779	8.02729	112	3
HPSE_rs4693602	58	307	319	48	298	332	0.522255	53	328	337	53	277	314	0.577405	57	300	334	49	305	317	0.670989	106	0.01	0.5	0.124057	0.133315	605	0.01	0.5	0.116479	0.120076	651	0.01	0.49	0.109355	0.114868	0.594473	106	4	36	19.8491	8.32071	605	0	38	21.9769	8.12665	651	0
HPSE_rs4693608	201	324	159	192	339	147	0.61506	213	347	158	180	316	148	0.772455	204	329	158	189	334	148	0.727657	393	0.01	0.5	0.117176	0.116064	663	0.01	0.5	0.111976	0.120917	306	0.01	0.49	0.11281	0.117529	0.459717	393	2	38	21.3232	7.61778	663	0	38	21.0452	8.34388	306	0
HPSE_rs4693611	10	145	529	8	137	533	0.786258	10	159	549	8	123	513	0.35691	14	149	528	4	133	534	0.0425862	18	0.01	0.39	0.139444	0.116188	282	0.01	0.5	0.120319	0.126284	1062	0.01	0.5	0.11146	0.116658	0.669015	18	9	34	21.8889	7.70705	282	0	38	21.8085	7.92708	1062	0
HPSE_rs4693614	390	262	32	408	232	38	0.257262	422	256	40	376	238	30	0.70245	416	241	34	382	253	36	0.468277	798	0.01	0.5	0.115313	0.119336	494	0.01	0.5	0.111194	0.117301	70	0.01	0.47	0.112286	0.122819	0.880947	798	0	38	21.0764	7.99532	494	0	38	21.3745	8.17949	70	4
HPSE_rs7691532	33	251	399	30	254	394	0.924013	29	271	418	34	234	375	0.522134	31	243	416	32	262	377	0.311597	63	0.01	0.45	0.133016	0.127768	505	0.01	0.5	0.112297	0.122348	793	0.01	0.5	0.113127	0.115621	0.390194	63	5	35	22.5714	8.1195	505	0	38	20.9624	8.35857	793	1
HSPG2_rs10799719	262	310	112	258	314	106	0.906998	282	332	104	238	292	114	0.254559	264	316	111	256	308	107	1	520	0.01	0.5	0.116154	0.123358	624	0.01	0.48	0.114519	0.11783	218	0.01	0.5	0.105275	0.109739	0.770924	520	2	38	21.35	8.08199	624	0	38	21.2708	8.08356	218	1
HSPG2_rs12404444	30	204	450	22	209	447	0.533357	24	227	467	28	186	430	0.387814	29	203	459	23	210	438	0.615844	52	0.01	0.47	0.125385	0.124546	413	0.01	0.48	0.107627	0.114445	897	0.01	0.5	0.115764	0.120296	0.470637	52	1	38	21.7885	8.95815	413	2	38	20.6901	7.98274	897	0
HSPG2_rs1545593	294	308	81	278	315	85	0.741846	291	348	79	281	275	87	0.0830114	290	318	82	282	305	84	0.926631	572	0.01	0.5	0.116451	0.123746	623	0.01	0.5	0.113018	0.116877	166	0.01	0.47	0.106988	0.107875	0.925518	572	2	38	21.3864	7.99908	623	0	38	21.1814	8.15056	166	0
HSPG2_rs2124368	17	174	488	21	164	487	0.710219	19	171	524	19	167	451	0.559874	19	165	502	19	173	473	0.705968	38	0.01	0.49	0.0910526	0.116196	338	0.01	0.5	0.120385	0.121253	975	0.01	0.49	0.111908	0.117849	0.0803156	38	0	38	19.3684	9.66862	338	0	38	21.7426	8.17839	975	1
HSPG2_rs2270701	20	186	478	25	166	487	0.42735	23	171	524	22	181	441	0.177638	21	176	494	24	176	471	0.797046	45	0.01	0.49	0.092	0.125691	352	0.01	0.5	0.119233	0.119215	965	0.01	0.49	0.112642	0.118177	0.0364646	45	0	33	19.1778	8.32381	352	0	38	21.4233	8.1653	965	1
HSPG2_rs2290501	336	273	74	343	269	66	0.767576	367	272	78	312	270	62	0.307363	346	277	68	333	265	72	0.860606	679	0.01	0.48	0.112828	0.120017	542	0.01	0.5	0.118616	0.119673	140	0.01	0.49	0.0979286	0.107613	0.352101	679	1	38	21.296	8.0677	542	0	38	21.3229	8.16789	140	0
HSPG2_rs2305562	134	342	208	129	336	211	0.942098	128	366	222	135	312	197	0.336869	137	329	224	126	349	195	0.249798	263	0.01	0.49	0.108327	0.118235	678	0.01	0.5	0.115752	0.119415	419	0.01	0.48	0.113842	0.118256	0.533856	263	0	38	20.7148	8.43285	678	0	38	21.1445	8.02377	419	1
HSPG2_rs3767138	25	199	460	24	204	450	0.930857	24	217	477	25	186	433	0.77097	27	202	462	22	201	448	0.802197	49	0.01	0.47	0.115306	0.11549	403	0.01	0.48	0.111092	0.119758	910	0.01	0.5	0.114714	0.118526	0.636557	49	1	38	22.5102	8.91189	403	0	38	20.7345	8.13117	910	0
HSPG2_rs4233280		19	665		12	666	0.275632		18	700		13	631	0.58913		17	674		14	657	0.7179						31	0.01	0.5	0.115484	0.125082	1331	0.01	0.5	0.113621	0.118608	0.723001						31	8	34	20.871	7.56193	1331	0
HSPG2_rs4654773	17	180	487	14	169	495	0.724345	11	180	527	20	169	455	0.12224	11	182	498	20	167	484	0.204079	31	0.01	0.5	0.101613	0.116936	349	0.01	0.48	0.118424	0.120168	982	0.01	0.5	0.112352	0.118305	0.354776	31	8	35	20.4839	6.80133	349	0	38	21.596	8.02583	982	0
HSPG2_rs6698486	42	246	396	49	239	390	0.71889	43	259	416	48	226	370	0.554276	48	252	391	43	233	395	0.688018	91	0.01	0.47	0.110549	0.116116	485	0.01	0.48	0.106969	0.110583	786	0.01	0.5	0.118155	0.123686	0.623735	91	0	37	20.4176	8.34408	485	0	38	20.9299	8.24842	786	1
HSPG2_rs7556412	288	317	79	289	310	79	0.978529	294	343	81	283	284	77	0.398042	291	317	83	286	310	75	0.894356	577	0.01	0.5	0.117331	0.121739	627	0.01	0.49	0.111148	0.117625	158	0.01	0.47	0.110253	0.111971	0.506411	577	0	38	21.4714	7.94903	627	0	38	20.9745	8.1691	158	1
ICAM1_rs281432	211	324	149	168	367	143	0.0216675	197	379	142	182	312	150	0.192484	200	350	141	179	341	151	0.516775	379	0.01	0.48	0.114617	0.117081	691	0.01	0.5	0.113198	0.121244	292	0.01	0.49	0.113527	0.115089	0.830017	379	1	38	21.1161	8.02194	691	1	38	21.3039	8.05292	292	0
ICAM1_rs3093030	139	327	217	128	360	190	0.148173	140	367	211	127	320	196	0.877521	141	341	209	126	346	198	0.65302	267	0.01	0.48	0.114906	0.116323	687	0.01	0.5	0.113188	0.118024	407	0.01	0.5	0.113686	0.121808	0.947396	267	1	38	21.191	7.8991	687	0	38	21.1776	7.99784	407	0
ICAM1_rs3093032	16	171	497	11	169	498	0.659645	16	175	527	11	165	468	0.717112	16	163	512	11	177	483	0.369074	27	0.01	0.37	0.128519	0.117103	340	0.01	0.5	0.118971	0.12543	995	0.01	0.5	0.111447	0.116407	0.608715	27	4	36	20.2222	8.38191	340	0	38	21.2471	8.28355	995	0
ICAM1_rs5030390	4	88	592	2	88	588	0.818108	2	98	618	4	78	562	0.455237	1	90	600	5	86	580	0.294154	6	0.01	0.03	0.0266667	0.00816497	176	0.01	0.49	0.106875	0.112035	1180	0.01	0.5	0.115119	0.11982	0.0495757	6	22	34	28.8333	4.16733	176	3	38	20.7443	7.61858	1180	0
IDI2_rs1044261	3	84	597	5	79	594	0.721776	4	90	624	4	73	567	0.78757	7	77	607	1	86	584	0.0724358	8	0.01	0.42	0.1125	0.136356	163	0.01	0.48	0.118712	0.127459	1191	0.01	0.5	0.112981	0.117441	0.927503	8	11	33	22.5	8.84792	163	1	38	21.3681	8.09508	1191	0
IDI2_rs2279257	23	196	465	25	208	445	0.648161	23	218	477	25	186	433	0.695719	23	197	471	25	207	439	0.557532	48	0.01	0.48	0.12125	0.114178	404	0.01	0.5	0.106782	0.113737	910	0.01	0.49	0.116319	0.121076	0.234711	48	0	38	22.4583	8.33337	404	1	38	20.9134	7.83356	910	0
IGF1_rs1549593	17	162	505	26	164	488	0.34016	19	176	523	24	150	470	0.476037	23	168	500	20	158	493	0.882208	43	0.01	0.42	0.10093	0.0953643	326	0.01	0.49	0.108221	0.114636	993	0.01	0.5	0.116002	0.12092	0.504769	43	3	35	20.1395	8.63432	326	0	38	20.8374	8.03691	993	0
IGF1_rs5742629	354	269	61	367	261	50	0.497363	363	294	61	358	236	50	0.179012	359	269	63	362	261	48	0.392016	721	0.01	0.5	0.11681	0.119772	530	0.01	0.5	0.109943	0.11879	111	0.01	0.48	0.110991	0.11164	0.420448	721	0	38	21.0693	8.18404	530	0	38	21.5472	7.92204	111	6
IGF1_rs5742671	29	215	439	20	203	455	0.32355	25	244	449	24	174	445	0.0212129	28	224	439	21	194	455	0.214688	49	0.01	0.47	0.116122	0.111165	418	0.01	0.5	0.109809	0.119682	894	0.01	0.5	0.115101	0.118608	0.560626	49	6	38	20.6939	8.38203	418	0	38	21.2703	7.90174	894	0
IGF1_rs5742678	361	261	62	366	265	47	0.352578	356	308	54	371	218	55	0.00274152	358	274	59	369	252	50	0.468035	727	0.01	0.5	0.116878	0.119398	526	0.01	0.49	0.108137	0.116192	109	0.01	0.5	0.118899	0.126032	0.350558	727	1	38	21.37	8.14414	526	0	38	20.9753	8.07332	109	6
IGF1_rs5742694	373	257	53	372	266	40	0.382306	368	299	51	377	224	42	0.0222087	367	274	49	378	249	44	0.507889	745	0.01	0.5	0.116268	0.118687	523	0.01	0.49	0.108948	0.116896	93	0.01	0.5	0.120215	0.129321	0.389132	745	1	38	21.3987	8.15497	523	0	38	20.9694	8.03578	93	6
IGF1_rs6214	116	333	235	100	320	258	0.287485	111	350	257	105	303	236	0.804746	97	348	246	119	305	247	0.0902375	216	0.01	0.48	0.124491	0.12032	653	0.01	0.5	0.112986	0.121859	493	0.01	0.5	0.109817	0.113627	0.193403	216	0	38	21.5185	7.89463	653	1	38	21.4012	8.00909	493	0
IGF1_rs6219	5	133	546	10	119	549	0.295444	8	155	555	7	97	540	0.00752909	7	147	537	8	105	558	0.025234	15	0.01	0.47	0.114667	0.122816	252	0.01	0.49	0.106071	0.112154	1095	0.01	0.5	0.115397	0.120151	0.588211	15	6	34	18	8.5857	252	0	38	21.8214	7.81024	1095	0
IL1A_rs1878318	348	276	60	319	285	74	0.242899	346	299	73	321	262	61	0.811283	348	266	77	319	295	57	0.0670957	667	0.01	0.5	0.112894	0.118653	561	0.01	0.5	0.115348	0.117954	134	0.01	0.49	0.110448	0.12289	0.890916	667	0	38	20.985	7.90293	561	0	38	21.4064	8.31407	134	5
IL1A_rs3783521	70	292	322	70	276	332	0.753623	72	283	363	68	285	291	0.132484	71	291	329	69	277	325	0.955483	140	0.01	0.5	0.0986429	0.110083	568	0.01	0.49	0.114965	0.116663	654	0.01	0.5	0.115749	0.122148	0.371948	140	4	37	20.2857	8.03615	568	0	38	21.2077	8.19574	654	1
IL1A_rs3783538	669	15		665	13		0.849036	707	11		627	17		0.181383	673	18		661	10		0.181726	1334	0.01	0.5	0.114303	0.119286	28	0.01	0.3	0.0832143	0.0829124						0.208719	1334	0	38	21.1807	8.05055	28	6	38	22.3571	9.58477
IL1A_rs3783546	321	292	71	331	276	71	0.752386	363	282	73	289	286	69	0.104666	328	291	72	324	277	70	0.955724	652	0.01	0.5	0.11546	0.122218	568	0.01	0.49	0.115387	0.116741	142	0.01	0.5	0.0985211	0.109538	0.377465	652	1	38	21.4018	8.00276	568	0	38	21.206	8.19718	142	4
IL1A_rs3917368	78	326	280	77	281	320	0.0496872	70	331	317	85	276	283	0.113581	71	318	302	84	289	298	0.330045	155	0.01	0.5	0.115161	0.120838	607	0.01	0.49	0.119193	0.121122	600	0.01	0.5	0.107683	0.115568	0.0575178	155	2	37	21.4452	7.99849	607	1	38	21.9951	7.863	600	0
IL1B_rs1071676	32	253	399	47	247	384	0.203908	46	258	414	33	242	369	0.537434	46	246	399	33	254	384	0.325582	79	0.01	0.44	0.110506	0.117756	500	0.01	0.49	0.11304	0.117907	783	0.01	0.5	0.114381	0.119459	0.899971	79	5	37	21.8481	8.09889	500	0	38	20.99	8.41972	783	0
IL1B_rs1143634	33	249	402	47	247	384	0.242867	47	255	416	33	241	370	0.464856	46	244	401	34	252	385	0.37896	80	0.01	0.44	0.109625	0.117273	496	0.01	0.49	0.112056	0.117195	786	0.01	0.5	0.115089	0.119927	0.794567	80	5	37	21.7125	8.13835	496	0	38	21.0262	8.42659	786	0
IL1B_rs16944	80	319	285	83	302	293	0.744989	87	323	308	76	298	270	0.897964	81	312	298	82	309	280	0.871131	163	0.01	0.49	0.0990184	0.108907	621	0.01	0.5	0.114831	0.119421	578	0.01	0.5	0.11654	0.120481	0.194948	163	0	38	19.2577	7.81151	621	0	38	21.3655	8.08024	578	0
IL1RN_rs1794065	67	274	343	56	264	358	0.483678	71	281	366	52	257	335	0.510187	60	280	351	63	258	350	0.718605	123	0.01	0.39	0.0905691	0.0936973	538	0.01	0.5	0.120651	0.123175	701	0.01	0.49	0.112354	0.118731	0.162996	123	0	38	20.5772	8.23727	538	0	38	21.2993	8.14771	701	0
IL1RN_rs2232354	441	211	32	452	193	33	0.625823	464	223	31	429	181	34	0.393964	444	213	34	449	191	31	0.587912	893	0.01	0.5	0.112497	0.11804	404	0.01	0.5	0.116535	0.119249	65	0.01	0.43	0.111846	0.12597	0.644154	893	0	38	21.0235	8.09227	404	0	38	21.5297	8.03816	65	6
IL1RN_rs315919	128	302	254	113	317	248	0.509186	124	326	268	117	293	234	0.887256	117	316	258	124	303	244	0.754329	241	0.01	0.45	0.108921	0.110316	619	0.01	0.5	0.116801	0.122004	502	0.01	0.49	0.112072	0.118602	0.78004	241	0	38	20.805	8.29052	619	0	38	21.1131	8.12026	502	1
IL1RN_rs315934	435	229	20	441	208	29	0.263041	466	231	21	410	206	28	0.372733	446	220	25	430	217	24	0.983914	876	0.01	0.5	0.112021	0.117953	437	0.01	0.49	0.116888	0.119425	49	0.01	0.48	0.114286	0.127525	0.73578	876	0	38	21.2203	8.12407	437	1	38	21.389	8.01259	49	6
IL1RN_rs315952	372	262	50	354	258	66	0.264568	383	277	58	343	243	58	0.81387	383	248	60	343	272	56	0.207864	726	0.01	0.5	0.112383	0.117868	520	0.01	0.49	0.115212	0.117897	116	0.01	0.48	0.114741	0.128222	0.74503	726	0	38	21.6419	7.99732	520	0	38	20.8923	8.24481	116	5
IL1RN_rs4251961	285	298	101	266	321	91	0.369849	277	347	94	274	272	98	0.0751794	270	323	98	281	296	94	0.553499	551	0.01	0.48	0.112704	0.11502	619	0.01	0.5	0.11504	0.122047	192	0.01	0.48	0.111979	0.1188	0.994453	551	0	38	20.8838	8.06367	619	0	38	21.1906	8.16056	192	4
IL1RN_rs4252041	0	50	634	2	53	623	0.469434	0	64	654	2	39	603	0.0315892	1	58	632	1	45	625	0.588202	2	0.01	0.03	0.02	0.0141421	103	0.01	0.49	0.130388	0.13167	1257	0.01	0.5	0.112442	0.117575	0.0619248	2	6	20	13	9.89949	103	4	38	22.699	8.16116	1257	0
IL1RN_rs928940	536	135	13	515	150	13	0.561303	565	142	11	486	143	15	0.275933	545	132	14	506	153	12	0.238458	1051	0.01	0.5	0.111893	0.11782	285	0.01	0.47	0.121719	0.122914	26	0.01	0.44	0.0969231	0.10665	0.374843	1051	0	38	21.3064	8.05406	285	0	38	20.8772	8.15663	26	5
IL6_rs1548216		29	655		38	640	0.261187		29	689		38	606	0.131957		27	664		40	631	0.102684						67	0.01	0.48	0.108657	0.112961	1295	0.01	0.5	0.113923	0.119037	0.8189						67	0	38	21.7612	8.52819	1295	0
IL6_rs1554606	132	326	226	153	329	196	0.159494	149	349	220	136	306	202	0.926015	147	329	215	138	326	207	0.923749	285	0.01	0.48	0.110702	0.118952	655	0.01	0.5	0.112947	0.118256	422	0.01	0.5	0.116777	0.119465	0.655492	285	0	38	21.3509	8.1264	655	0	38	21.1237	8.46173	422	1
IL6_rs2069827	8	108	568	7	129	542	0.279986	11	116	591	4	121	519	0.144384	6	119	566	9	118	544	0.689858	15	0.03	0.41	0.150667	0.120917	237	0.01	0.48	0.111519	0.116223	1110	0.01	0.5	0.113622	0.11923	0.203281	15	12	34	22	6.29058	237	0	38	21.7468	8.26643	1110	0
IL6_rs2069861	8	116	560	7	109	562	0.866513	8	117	593	7	108	529	0.964639	8	116	567	7	109	555	0.942776	15	0.01	0.47	0.105333	0.123165	225	0.01	0.48	0.124044	0.119254	1122	0.01	0.5	0.111693	0.11854	0.314643	15	9	36	26.2667	7.07578	225	0	37	21.7778	8.10337	1122	0
INSR_rs1035941	52	268	364	52	269	357	0.981709	58	270	390	46	267	331	0.32766	49	274	368	55	263	353	0.749716	104	0.01	0.47	0.102115	0.107853	537	0.01	0.5	0.110335	0.115166	721	0.01	0.5	0.117809	0.122702	0.735506	104	3	38	22.4904	8.65745	537	0	38	20.7002	7.87907	721	0
INSR_rs10500204	351	275	58	350	272	56	0.985927	370	284	64	331	263	50	0.713528	360	279	52	341	268	62	0.52072	701	0.01	0.5	0.111441	0.117155	547	0.01	0.49	0.114113	0.11958	114	0.01	0.5	0.125175	0.124298	0.554216	701	0	38	20.9914	8.01142	547	0	38	21.3839	8.24303	114	2
INSR_rs1052371	18	176	490	15	192	471	0.525434	19	185	514	14	183	447	0.507021	23	180	488	10	188	473	0.0728999	33	0.01	0.44	0.0936364	0.107378	368	0.01	0.48	0.110408	0.119618	961	0.01	0.5	0.115598	0.118755	0.361266	33	7	37	21.7576	7.56237	368	0	38	20.462	8.04169	961	0
INSR_rs11671975	382	260	42	394	241	43	0.646532	408	261	49	368	240	36	0.637944	397	255	39	379	246	46	0.657343	776	0.01	0.5	0.110915	0.116577	501	0.01	0.49	0.116148	0.120506	85	0.01	0.5	0.124118	0.127618	0.744641	776	0	38	20.9768	8.01173	501	0	38	21.481	8.26862	85	2
INSR_rs2042902	174	352	158	178	341	159	0.903607	193	364	161	159	329	156	0.571754	192	342	157	160	351	160	0.255564	352	0.01	0.49	0.108892	0.113718	693	0.01	0.5	0.117706	0.122433	317	0.01	0.5	0.110126	0.115892	0.790343	352	0	38	20.9261	8.0483	693	0	38	21.2771	8.09685	317	0
INSR_rs2059807	86	346	252	93	355	230	0.501233	107	346	265	72	355	217	0.0208934	90	364	237	89	337	245	0.64189	179	0.01	0.45	0.111061	0.116698	701	0.01	0.5	0.109643	0.1184	482	0.01	0.5	0.120477	0.119837	0.11655	179	6	38	22.0279	7.39148	701	0	38	20.9073	8.19398	482	0
INSR_rs2115386	158	347	179	149	344	185	0.838455	169	361	188	138	330	176	0.637724	167	345	179	140	346	185	0.336331	307	0.01	0.49	0.112866	0.117422	691	0.01	0.5	0.116425	0.121778	364	0.01	0.5	0.109093	0.113967	0.931474	307	0	38	21.3062	8.01005	691	0	38	21.068	8.1582	364	0
INSR_rs2252673	464	202	18	448	215	15	0.622513	477	226	15	435	191	18	0.569667	479	199	13	433	218	20	0.109771	912	0.01	0.5	0.116513	0.122029	417	0.01	0.47	0.109161	0.11262	33	0.01	0.48	0.0918182	0.0978026	0.534625	912	2	38	21.3487	7.9646	417	0	38	21.0264	8.33879	33	0
INSR_rs2288404	157	330	197	177	332	169	0.190245	180	338	200	154	324	166	0.484484	167	331	193	167	331	173	0.672668	334	0.01	0.45	0.111527	0.114358	662	0.01	0.5	0.11426	0.121169	366	0.01	0.49	0.114536	0.118413	0.98751	334	0	38	21.9222	7.97631	662	0	38	21.1888	7.77865	366	1
INSR_rs2860184	97	323	264	71	307	300	0.0348262	88	338	292	80	292	272	0.8056	91	325	275	77	305	289	0.398471	168	0.01	0.49	0.130238	0.124145	630	0.01	0.5	0.118175	0.121249	564	0.01	0.5	0.103688	0.113428	0.00576288	168	3	37	22.0893	8.23737	630	0	38	20.9524	7.99767	564	0
INSR_rs2962	6	97	581	6	89	583	0.880619	9	88	621	3	98	543	0.0948769	9	99	583	3	87	581	0.173574	12	0.03	0.32	0.115	0.121693	186	0.01	0.49	0.117419	0.11938	1164	0.01	0.5	0.11305	0.118667	0.764255	12	4	35	19.25	8.75032	186	0	38	22.0699	8.29982	1164	0
INSR_rs3745550	24	208	452	25	175	478	0.170638	23	212	483	26	171	447	0.382328	24	198	469	25	185	461	0.89902	49	0.01	0.44	0.100816	0.107468	383	0.01	0.5	0.125875	0.123219	930	0.01	0.5	0.109312	0.117117	0.0446661	49	4	38	19.6939	8.75168	383	1	38	20.7206	8.23781	930	0
INSR_rs4247374	19	161	504	13	149	516	0.428982	20	158	540	12	152	480	0.44421	14	161	516	18	149	504	0.667822	32	0.01	0.38	0.118438	0.126494	310	0.01	0.5	0.120613	0.125003	1020	0.01	0.5	0.111402	0.116518	0.648981	32	8	37	20.7188	8.1448	310	4	38	21.3839	7.97109	1020	0
INSR_rs4499341	276	315	93	268	323	87	0.824605	288	332	98	256	306	82	0.843973	281	319	91	263	319	89	0.851976	544	0.01	0.5	0.116011	0.121893	638	0.01	0.5	0.113307	0.117918	180	0.01	0.48	0.107833	0.111997	0.981473	544	0	38	21.5221	8.02342	638	0	38	20.7571	8.06015	180	3
INSR_rs4804103	13	194	477	23	173	482	0.142902	21	206	491	15	161	468	0.213679	17	182	492	19	185	467	0.784483	36	0.01	0.45	0.105833	0.107925	367	0.01	0.49	0.1103	0.115599	959	0.01	0.5	0.115245	0.120335	0.743202	36	6	35	20.75	8.67632	367	2	37	21.1717	8.01845	959	0
INSR_rs4804195	238	341	105	264	312	102	0.268825	260	337	121	242	316	86	0.200095	257	324	110	245	329	97	0.658009	502	0.01	0.5	0.10496	0.110994	653	0.01	0.5	0.117994	0.122689	207	0.01	0.48	0.121111	0.123293	0.264997	502	0	38	20.992	8.21614	653	0	38	21.3354	7.91922	207	3
INSR_rs4804404	485	185	14	490	173	15	0.79708	525	176	17	450	182	12	0.259127	489	187	15	486	171	14	0.791206	975	0.01	0.5	0.112205	0.119615	358	0.01	0.49	0.116844	0.115394	29	0.01	0.45	0.123448	0.131156	0.327634	975	0	38	21.04	8.06337	358	0	38	21.5475	8.06984	29	6
INSR_rs6510952	2	19	663	1	23	654	0.65058	1	26	691	2	16	626	0.431521	2	17	672	1	25	645	0.407297	3	0.01	0.38	0.213333	0.187705	42	0.01	0.45	0.115476	0.123845	1317	0.01	0.5	0.113379	0.118406	0.771958	3	7	31	16.6667	12.6623	42	4	36	22.2619	7.67021	1317	0
INSR_rs6510975	140	334	210	167	325	186	0.139471	160	347	211	147	312	185	0.948786	145	342	204	162	317	192	0.375985	307	0.01	0.5	0.104365	0.110219	659	0.01	0.5	0.111184	0.118509	396	0.01	0.49	0.125	0.124672	0.0885865	307	0	38	20.8893	8.38381	659	0	38	21.3551	8.07139	396	1
INSR_rs7254060	3	68	613	6	70	602	0.60772	3	63	652	6	75	563	0.100918	5	69	617	4	69	598	0.982095	9	0.01	0.12	0.0622222	0.0423609	138	0.01	0.5	0.122536	0.123643	1215	0.01	0.5	0.113037	0.11846	0.420095	9	3	30	16.8889	10.3976	138	0	36	21.2826	8.00546	1215	0
INSR_rs7254487	329	303	52	381	256	41	0.0107541	388	282	48	322	277	45	0.328144	347	289	55	363	270	38	0.149429	710	0.01	0.5	0.10638	0.113569	559	0.01	0.5	0.11907	0.121469	93	0.01	0.49	0.136774	0.135864	0.0352086	710	0	38	20.9944	7.97139	559	0	38	21.4758	8.16534	93	4
INSR_rs7254921	172	351	161	141	339	198	0.0291499	162	371	185	151	319	174	0.73158	158	359	174	155	331	185	0.544661	313	0.01	0.49	0.126805	0.126128	690	0.01	0.5	0.113072	0.117386	359	0.01	0.5	0.103343	0.113718	0.0307475	313	3	38	21.7732	8.36869	690	0	38	21.1072	8.05497	359	0
INSR_rs7508679	126	355	203	117	337	224	0.407682	122	368	228	121	324	199	0.685566	122	360	209	121	332	218	0.595861	243	0.01	0.5	0.131811	0.133364	692	0.01	0.5	0.108974	0.114266	427	0.01	0.48	0.110937	0.116228	0.181996	243	0	38	21.9588	8.13308	692	0	38	21.1257	8.07043	427	2
INSR_rs8103483	183	347	154	173	335	170	0.537024	183	353	182	173	329	142	0.359988	182	349	160	174	333	164	0.860084	356	0.01	0.5	0.115618	0.12014	682	0.01	0.5	0.114501	0.121309	324	0.01	0.48	0.109753	0.111663	0.805099	356	3	38	21.4157	8.03452	682	0	38	21.0689	8.03277	324	0
INSR_rs8109957	559	120	5	557	116	5	0.971865	582	131	5	534	105	5	0.62562	565	122	4	551	114	6	0.754988	1116	0.01	0.5	0.112222	0.117975	236	0.01	0.49	0.120805	0.121902	10	0.01	0.41	0.106	0.130741	0.440143	1116	0	38	21.2903	8.04873	236	3	37	20.8814	8.23037	10	11
INSR_rs8111710	36	255	393	35	222	421	0.197508	46	242	430	25	235	384	0.086931	41	238	412	30	239	402	0.46448	71	0.01	0.41	0.116197	0.122269	477	0.01	0.49	0.124319	0.125425	814	0.01	0.5	0.107199	0.11395	0.117226	71	3	38	21.9718	8.30658	477	0	38	21.1426	8.36237	814	0
INSR_rs890860	19	229	436	23	228	427	0.79523	28	237	453	14	220	410	0.18392	19	242	430	23	215	433	0.436638	42	0.01	0.44	0.10119	0.110811	457	0.01	0.48	0.111641	0.116366	863	0.01	0.5	0.115342	0.120376	0.804055	42	4	36	19.6667	7.18286	457	4	38	21.2013	7.86223	863	0
INSR_rs890862	65	294	325	69	313	296	0.359491	69	309	340	65	298	281	0.386796	72	312	307	62	295	314	0.59959	134	0.01	0.45	0.125075	0.12289	607	0.01	0.5	0.109012	0.11422	621	0.01	0.5	0.115749	0.122024	0.361612	134	3	38	21.9851	8.28622	607	0	38	20.6985	8.18937	621	4
INSR_rs919275	248	311	125	257	329	92	0.0588706	254	353	111	251	287	106	0.23196	253	326	112	252	314	105	0.927144	505	0.01	0.5	0.112594	0.117572	640	0.01	0.5	0.109281	0.116024	217	0.01	0.49	0.129078	0.128135	0.132794	505	0	38	21.2911	8.16596	640	1	38	21.2437	8.12134	217	4
IRS1_rs1078533		36	647		30	648	0.528564		35	682		31	613	1		38	653		28	642	0.312674						66	0.01	0.49	0.116212	0.125573	1295	0.01	0.5	0.113413	0.118366	0.960988						66	7	37	22.4394	7.88987	1295	0
IRS1_rs2288587	619	64	1	616	61	1	0.925633	654	63	1	581	62	1	0.81967	626	63	2	609	62	0	0.629788	1235	0.01	0.5	0.112478	0.11782	125	0.01	0.47	0.124	0.12686	2	0.09	0.31	0.2	0.155563	0.379917	1235	0	38	21.2057	8.07731	125	2	38	21.312	8.17886	2	13
IRS1_rs2435185	647	36	1	646	31	1	0.80826	683	35	0	610	32	2	0.47568	654	37	0	639	30	2	0.310612	1293	0.01	0.5	0.112367	0.117873	67	0.01	0.5	0.135821	0.128796	2	0.01	0.41	0.21	0.282843	0.284022	1293	0	38	21.2166	8.0993	67	6	35	21.1343	7.60362	2	4
IRS1_rs4675094	6	110	568	5	106	567	0.93341	5	114	599	6	102	536	0.906579	5	111	575	6	105	560	0.920133	11	0.02	0.39	0.116364	0.147124	216	0.01	0.49	0.116019	0.121895	1135	0.01	0.5	0.113189	0.117915	0.821113	11	2	38	18.4545	9.0594	216	2	38	21.8611	8.14572	1135	0
IRS1_rs4675095	2	79	603	1	78	599	1	0	84	634	3	73	568	0.228736	1	76	614	2	81	588	0.643385	3	0.03	0.31	0.13	0.156205	157	0.01	0.47	0.115987	0.123428	1202	0.01	0.5	0.113319	0.118105	0.889532	3	13	19	15.3333	3.21455	157	2	38	21.4586	8.12285	1202	0
IRS1_rs4675096	5	103	576	6	102	570	0.98626	8	104	606	3	101	540	0.357704	8	102	581	3	103	565	0.354672	11	0.02	0.48	0.102727	0.141145	205	0.01	0.5	0.114976	0.112966	1146	0.01	0.5	0.113534	0.119589	0.547353	11	10	29	22.2727	5.88372	205	2	38	21.1415	7.98371	1146	0
ITGA2_rs1421942	132	351	201	129	323	226	0.266664	141	361	216	120	313	211	0.560922	129	347	215	132	327	212	0.843158	261	0.01	0.5	0.112682	0.118099	674	0.01	0.5	0.118902	0.122491	427	0.01	0.49	0.105995	0.112709	0.273742	261	3	38	20.9732	7.61143	674	0	38	21.3457	8.46077	427	0
ITGA2_rs2303127	242	318	124	245	303	130	0.779585	254	324	140	233	297	114	0.694195	235	328	128	252	293	126	0.322115	487	0.01	0.49	0.110986	0.114424	621	0.01	0.5	0.116522	0.12263	254	0.01	0.5	0.111811	0.117338	0.949885	487	1	38	21.7248	7.8966	621	0	38	20.9565	8.13374	254	2
ITGA2_rs26679	74	272	338	93	298	287	0.0236851	84	296	338	83	274	287	0.610235	84	307	300	83	263	325	0.129627	167	0.01	0.47	0.112635	0.115023	570	0.01	0.5	0.117982	0.121838	625	0.01	0.49	0.11	0.116833	0.502712	167	2	38	21.0539	8.02651	570	0	38	21.1123	8.09834	625	0
ITGA2_rs26680	8	143	533	10	162	506	0.356981	7	167	544	11	138	495	0.375012	10	168	513	8	137	526	0.201958	18	0.01	0.41	0.118333	0.131965	305	0.01	0.5	0.119934	0.121015	1039	0.01	0.49	0.111742	0.117846	0.353101	18	6	37	22.8333	8.61087	305	2	38	20.7902	8.23994	1039	0
ITGA2_rs28051	10	137	537	8	131	539	0.841644	6	139	573	12	129	503	0.235706	6	134	551	12	134	525	0.311824	18	0.01	0.33	0.0983333	0.107279	268	0.01	0.5	0.116007	0.119779	1076	0.01	0.5	0.113336	0.118704	0.77222	18	4	33	19.4444	9.24326	268	0	38	20.7836	7.92603	1076	0
ITGA2_rs3212383	23	215	446	47	207	424	0.0112407	34	214	470	36	208	400	0.412454	37	213	441	33	209	429	0.941853	70	0.01	0.41	0.0837143	0.0884844	422	0.01	0.49	0.123839	0.124631	870	0.01	0.5	0.111138	0.117453	0.0663508	70	5	36	21.5	7.45567	422	0	38	21.045	8.10122	870	0
ITGA2_rs3212386	21	191	472	12	149	517	0.00773463	18	195	505	15	145	484	0.128994	15	174	502	18	166	487	0.82206	33	0.01	0.49	0.161515	0.152748	340	0.01	0.48	0.113235	0.122203	989	0.01	0.5	0.112214	0.115993	0.274547	33	8	38	22.4242	8.18929	340	1	38	21.8206	8.18554	989	0
ITGA2_rs3212428	1	42	641	1	40	637	0.954698	2	52	664	0	30	614	0.0372549	0	44	647	2	38	631	0.370328	2	0.03	0.45	0.24	0.296985	82	0.01	0.48	0.0960976	0.100354	1278	0.01	0.5	0.114593	0.119439	0.554024	2	24	35	29.5	7.77817	82	2	36	19.3659	7.01412	1278	0
ITGA2_rs3212433	111	331	242	115	330	233	0.89957	116	345	257	110	316	218	0.731372	109	338	244	117	323	231	0.708049	226	0.01	0.49	0.107434	0.112497	661	0.01	0.5	0.108003	0.113862	475	0.01	0.5	0.124505	0.12737	0.180509	226	0	38	21.3805	8.00258	661	1	38	21.3389	8.10668	475	0
ITGA2_rs3212435	76	304	304	76	301	301	1	78	316	324	74	289	281	0.835489	74	310	307	78	295	298	0.85194	152	0.01	0.49	0.104013	0.113804	605	0.01	0.5	0.109851	0.114931	605	0.01	0.5	0.119901	0.123412	0.314829	152	0	38	21.1974	8.11428	605	1	38	21.5455	8.06144	605	0
ITGA2_rs3212472	308	295	80	323	270	83	0.47397	317	306	94	314	259	69	0.160941	318	289	84	313	276	79	0.95496	631	0.01	0.49	0.110729	0.116081	565	0.01	0.5	0.115115	0.119203	163	0.01	0.5	0.121534	0.127626	0.674861	631	0	38	21.4247	7.971	565	0	36	21.0389	8.13594	163	3
ITGA2_rs3212476	373	262	49	378	238	62	0.263531	405	259	54	346	241	57	0.506043	376	258	57	375	242	54	0.861778	751	0.01	0.5	0.110413	0.116115	500	0.01	0.48	0.11736	0.121321	111	0.01	0.49	0.119009	0.124499	0.769696	751	0	38	21.1611	8.17162	500	0	38	21.3	8.00563	111	2
ITGA2_rs3212487	4	89	591	4	98	576	0.722866	3	98	617	5	89	550	0.719465	5	87	599	3	100	568	0.406158	8	0.01	0.25	0.1075	0.0916125	187	0.01	0.49	0.107594	0.109535	1167	0.01	0.5	0.114679	0.120323	0.915744	8	6	33	19.375	9.13295	187	2	38	21.1604	7.96065	1167	0
ITGA2_rs3212519	574	108	2	573	97	8	0.121955	603	110	5	544	95	5	0.956163	589	99	3	558	106	7	0.305756	1147	0.01	0.5	0.111857	0.117518	205	0.01	0.5	0.126537	0.125901	10	0.01	0.26	0.057	0.0740945	0.0762913	1147	0	38	21.3034	8.0547	205	0	37	20.8341	8.11932	10	3
ITGA2_rs3212533	192	321	171	176	335	167	0.602604	192	344	182	176	312	156	0.894051	178	345	168	190	311	170	0.391375	368	0.01	0.49	0.113125	0.116702	656	0.01	0.5	0.114878	0.12174	338	0.01	0.5	0.111893	0.11519	0.998945	368	1	38	21.9674	7.83265	656	0	38	20.9436	8.14158	338	2
ITGA2_rs3212574	34	243	407	28	234	416	0.664821	34	244	440	28	233	383	0.686823	28	256	407	34	221	416	0.228284	62	0.01	0.48	0.121774	0.119377	477	0.01	0.5	0.111677	0.121081	823	0.01	0.5	0.114204	0.11738	0.346578	62	6	38	22.0161	8.08458	477	0	38	20.891	8.26305	823	0
ITGA2_rs3212627	439	218	27	462	195	21	0.273039	470	222	26	431	191	22	0.851401	453	220	18	448	193	30	0.106247	901	0.01	0.5	0.111765	0.11651	413	0.01	0.5	0.116126	0.123003	48	0.01	0.48	0.128125	0.123196	0.569878	901	0	38	21.2708	7.98164	413	0	38	21.063	8.28649	48	6
ITGA2_rs3212657	550	124	10	525	146	7	0.252884	558	150	10	517	120	7	0.494203	533	147	11	542	123	6	0.179603	1075	0.01	0.49	0.11254	0.117823	270	0.01	0.5	0.11763	0.121577	17	0.03	0.41	0.121765	0.133989	0.634412	1075	0	38	21.3526	8.06915	270	2	37	20.3815	8.10198	17	12
ITGA2_rs3212674	19	201	461	27	198	452	0.48491	26	201	489	20	198	424	0.494575	27	203	460	19	196	453	0.54956	46	0.01	0.49	0.112826	0.124627	399	0.01	0.48	0.120652	0.124223	913	0.01	0.5	0.110767	0.116094	0.812055	46	5	36	22.087	7.57724	399	0	38	21.2055	8.08205	913	0
ITGA2_rs988557	316	284	59	324	265	64	0.630087	340	285	65	300	264	58	0.919249	324	281	66	316	268	57	0.824912	640	0.01	0.5	0.113891	0.118203	549	0.01	0.49	0.115137	0.120452	123	0.01	0.47	0.118374	0.122202	0.903715	640	0	38	21.2984	8.29729	549	0	38	21.102	7.96941	123	2
ITGA2_rs996765	570	108	6	575	98	5	0.772128	610	104	4	535	102	7	0.43466	580	107	4	565	99	7	0.60769	1145	0.01	0.5	0.113616	0.118722	206	0.01	0.48	0.112816	0.119196	11	0.03	0.33	0.134545	0.117249	0.68991	1145	0	38	21.2838	8.1215	206	1	38	20.7718	7.88586	11	12
ITGB3_rs10514919	44	251	388	44	276	358	0.303711	50	285	382	38	242	364	0.435662	44	269	377	44	258	369	0.976388	88	0.01	0.49	0.132841	0.133244	527	0.01	0.5	0.109374	0.115345	746	0.01	0.49	0.114129	0.118964	0.261525	88	2	37	21.4886	7.8915	527	1	38	21.5636	7.9971	746	0
ITGB3_rs11079772	326	293	65	306	309	63	0.592099	339	308	71	293	294	57	0.550743	311	314	66	321	288	62	0.570475	632	0.01	0.5	0.112753	0.1179	602	0.01	0.5	0.115216	0.119602	128	0.01	0.49	0.110859	0.119329	0.963626	632	0	38	21.0396	8.15849	602	1	38	21.2458	7.99996	128	3
ITGB3_rs11650072	75	324	285	83	337	258	0.378324	86	336	296	72	325	247	0.401606	87	342	262	71	319	281	0.251379	158	0.01	0.49	0.103354	0.114138	661	0.01	0.5	0.116354	0.119742	543	0.01	0.5	0.113389	0.118801	0.510229	158	3	37	21.3165	8.22772	661	0	38	21.174	7.97487	543	0
ITGB3_rs2015049	16	189	479	17	186	475	0.973346	15	202	501	18	173	453	0.625287	13	196	482	20	179	472	0.360017	33	0.02	0.45	0.115455	0.125775	375	0.01	0.5	0.108373	0.114323	954	0.01	0.5	0.115681	0.120208	0.441882	33	9	36	22.4242	6.98673	375	1	38	21.104	8.02985	954	0
ITGB3_rs2056131	62	327	295	69	285	324	0.10056	69	324	325	62	288	294	0.99334	63	324	304	68	288	315	0.32863	131	0.01	0.48	0.115191	0.122527	612	0.01	0.5	0.112337	0.121689	619	0.01	0.5	0.114653	0.115036	0.578542	131	4	38	21.9084	8.0665	612	0	38	20.9052	8.28863	619	0
ITGB3_rs2292699	76	330	278	98	331	249	0.111307	97	361	260	77	300	267	0.136686	90	334	267	84	327	260	0.964505	174	0.01	0.5	0.129138	0.132625	661	0.01	0.5	0.108427	0.114638	527	0.01	0.48	0.115123	0.118628	0.176764	174	1	37	21.3966	7.84151	661	0	38	21.1619	8.14896	527	0
ITGB3_rs3851806	500	170	12	472	188	15	0.358692	504	199	13	468	159	14	0.42233	495	176	16	477	182	11	0.561697	972	0.01	0.5	0.116821	0.120378	358	0.01	0.5	0.105894	0.114055	27	0.02	0.45	0.111111	0.125371	0.131432	972	0	38	21.2521	8.10838	358	0	38	21.0028	8.12076	27	11
ITGB3_rs3892084	8	196	480	13	200	465	0.485995	15	217	486	6	179	459	0.121568	6	193	492	15	203	453	0.0669898	21	0.03	0.5	0.14	0.159154	396	0.01	0.49	0.107652	0.116364	945	0.01	0.5	0.115598	0.118662	0.207512	21	12	36	23.7143	6.62679	396	0	38	21.0025	8.10329	945	0
ITGB3_rs4525555	63	300	321	73	308	297	0.423265	79	327	312	57	281	306	0.215634	64	306	321	72	302	297	0.570678	136	0.01	0.5	0.131176	0.133106	608	0.01	0.5	0.109243	0.11577	618	0.01	0.48	0.114159	0.118052	0.251306	136	2	37	21.5294	7.56595	608	0	38	21.4934	8.18404	618	0
ITGB3_rs5919	597	85	2	586	92	0	0.371601	615	102	1	568	75	1	0.30502	612	79	0	571	98	2	0.0561887	1183	0.01	0.5	0.113593	0.11811	177	0.01	0.5	0.113051	0.122311	2	0.07	0.35	0.21	0.19799	0.471448	1183	0	38	21.2037	8.07222	177	0	36	21.1299	8.16868	2	24
ITGB3_rs8074094	368	260	56	335	291	52	0.18372	362	295	61	341	256	47	0.550865	360	276	55	343	275	53	0.926771	703	0.01	0.49	0.114452	0.119315	551	0.01	0.5	0.109909	0.116203	108	0.01	0.49	0.127685	0.127144	0.32426	703	0	38	20.8421	8.2013	551	1	38	21.4955	7.91842	108	2
ITGB3_rs951351	0	44	640	2	52	624	0.253775	1	49	668	1	47	596	0.875933	2	56	633	0	40	631	0.0973509	2	0.03	0.08	0.055	0.0353553	96	0.01	0.49	0.11	0.113712	1264	0.01	0.5	0.114035	0.119187	0.871033	2	13	29	21	11.3137	96	0	37	19.8646	7.95993	1264	0
ITGB3_rs999323	331	298	55	297	312	69	0.158419	320	331	67	308	279	57	0.488454	305	318	68	323	292	56	0.287678	628	0.01	0.48	0.115096	0.11944	610	0.01	0.5	0.110115	0.116367	124	0.01	0.49	0.123871	0.126438	0.335136	628	0	38	21.1815	8.12161	610	0	38	21.2279	8.06758	124	1
KNG1_rs1621816	345	295	44	349	284	45	0.899641	372	296	50	322	283	39	0.544039	349	298	44	345	281	45	0.88569	694	0.01	0.49	0.111499	0.117032	579	0.01	0.5	0.115354	0.119069	89	0.01	0.48	0.119551	0.129921	0.64373	694	0	38	21.3876	8.11753	579	0	38	21.0604	8.12498	89	7
KNG1_rs1648714	53	271	360	46	293	339	0.382564	56	304	358	43	260	341	0.472832	46	265	380	53	299	319	0.0229578	99	0.01	0.49	0.109495	0.106526	564	0.01	0.5	0.109184	0.117174	699	0.01	0.5	0.117868	0.121549	0.42125	99	1	34	22.2626	7.63128	564	0	38	21.1383	8.22434	699	0
KNG1_rs2062632	425	219	40	417	231	30	0.40981	431	244	43	411	206	27	0.189477	413	239	39	429	211	31	0.259912	842	0.01	0.5	0.11829	0.122841	450	0.01	0.48	0.102578	0.110943	70	0.01	0.38	0.129286	0.112434	0.02142	842	0	38	21.2886	8.09066	450	0	38	20.6511	8.08532	70	8
KNG1_rs266762	263	333	88	262	316	100	0.553216	271	344	103	254	305	85	0.745425	270	333	88	255	316	100	0.518557	525	0.01	0.5	0.114914	0.120341	649	0.01	0.49	0.116055	0.11846	188	0.01	0.48	0.101915	0.114866	0.182599	525	0	38	21.1829	8.11422	649	0	38	21.3806	8.22063	188	4
KNG1_rs5029969	70	291	323	59	305	314	0.501477	69	317	332	60	279	305	0.919486	69	320	302	60	276	335	0.0721608	129	0.01	0.44	0.122636	0.116716	596	0.01	0.5	0.107919	0.117269	637	0.01	0.49	0.117221	0.120373	0.082249	129	6	36	21.3101	7.62787	596	0	38	20.7651	7.95102	637	0
KNG1_rs5029981	1	92	591	3	92	583	0.689711	2	95	621	2	89	553	0.907229	0	94	597	4	90	577	0.16239	4	0.01	0.11	0.045	0.0443471	184	0.01	0.48	0.116467	0.12268	1174	0.01	0.5	0.113458	0.118239	0.380061	4	11	35	24	10.3923	184	2	38	21.4293	8.10352	1174	0
KNG1_rs5030025	398	255	31	400	249	29	0.944515	425	264	29	373	240	31	0.740054	399	260	32	399	244	28	0.788347	798	0.01	0.49	0.112481	0.116599	504	0.01	0.5	0.114325	0.121228	60	0.01	0.43	0.123833	0.126519	0.556968	798	0	38	21.4737	8.08975	504	0	38	20.875	8.10531	60	7
KNG1_rs5030085		47	637		49	629	0.832745		50	668		46	598	0.915886		52	639		44	627	0.525875						96	0.01	0.45	0.110104	0.117871	1266	0.01	0.5	0.113934	0.118816	0.474739						96	0	38	20.7604	8.71507	1266	0
KNG1_rs5030093	41	237	406	35	243	400	0.761921	45	260	413	31	220	393	0.304576	46	248	397	30	232	409	0.149922	76	0.01	0.42	0.128947	0.119806	480	0.01	0.5	0.107292	0.114135	806	0.01	0.49	0.116017	0.121182	0.137354	76	8	36	23.2895	7.38795	480	0	38	20.8938	8.1281	806	0
KNG1_rs698078	230	335	119	240	313	125	0.586672	253	344	121	217	304	123	0.538113	233	328	130	237	320	114	0.648629	470	0.01	0.5	0.106574	0.114092	648	0.01	0.5	0.118457	0.119722	244	0.01	0.48	0.11459	0.124429	0.323625	470	1	38	21.2106	7.86427	648	0	38	21.1528	8.2075	244	3
LARP5_rs10752021	240	338	106	245	322	111	0.776251	252	344	122	233	316	95	0.531375	229	353	109	256	307	108	0.108872	485	0.01	0.5	0.113918	0.121553	660	0.01	0.5	0.112	0.115501	217	0.01	0.48	0.118157	0.122302	0.623265	485	0	38	21.268	8.14628	660	0	38	20.9727	8.17835	217	0
LARP5_rs10904584	405	229	50	414	224	39	0.481956	431	233	53	388	220	36	0.37472	415	227	48	404	226	41	0.805829	819	0.01	0.5	0.111563	0.116664	453	0.01	0.5	0.115695	0.120901	89	0.01	0.48	0.123146	0.127204	0.722546	819	0	38	21.2479	8.20226	453	0	38	21.2163	7.87468	89	4
LARP5_rs11253483	0	36	648	1	32	645	0.664814	0	43	675	1	25	618	0.0708805	0	32	659	1	36	634	0.49563	1	0.01	0.01	0.01		68	0.01	0.39	0.107794	0.108406	1293	0.01	0.5	0.114053	0.119269	0.262923	1	34	34	34		68	2	36	20.75	9.00477	1293	0
LARP5_rs2274375	44	252	387	49	245	384	0.831654	53	249	416	40	248	355	0.283485	38	264	389	55	233	382	0.0928929	93	0.01	0.5	0.130323	0.136934	497	0.01	0.49	0.103964	0.11222	771	0.01	0.5	0.117873	0.12018	0.133171	93	6	36	22.9247	6.99726	497	0	38	20.9557	8.54318	771	0
LARP5_rs2296625	482	187	15	456	204	18	0.426559	496	206	16	442	185	17	0.898103	482	194	15	456	197	18	0.691507	938	0.01	0.5	0.114787	0.120908	391	0.01	0.5	0.109591	0.113451	33	0.01	0.39	0.13	0.118004	0.626506	938	0	38	21.3838	8.13374	391	2	38	20.7545	7.80507	33	0
LARP5_rs4229	148	343	192	146	333	199	0.875472	155	349	214	139	327	177	0.618535	137	356	198	157	320	193	0.223399	294	0.01	0.5	0.118435	0.128175	676	0.01	0.49	0.106775	0.11139	391	0.01	0.5	0.121918	0.123254	0.154524	294	2	38	21.6973	8.0832	676	0	38	20.8166	8.27126	391	0
LARP5_rs7077992	232	325	127	223	316	138	0.699493	245	333	140	210	308	125	0.822556	235	330	126	220	311	139	0.506516	455	0.01	0.48	0.118066	0.121618	641	0.01	0.5	0.111388	0.117042	265	0.01	0.5	0.111925	0.118022	0.392321	455	0	38	21.3626	7.83744	641	0	38	21.0655	8.25807	265	0
LCAT_rs1109166	454	211	19	454	205	19	0.97563	476	219	23	432	197	15	0.648629	469	207	15	439	209	23	0.309156	908	0.01	0.5	0.116057	0.121491	416	0.01	0.48	0.107212	0.112159	38	0.01	0.44	0.127105	0.121074	0.381295	908	0	38	21.1993	8.13996	416	0	38	21.101	8.012	38	10
LCAT_rs4986970		38	646		35	643	0.810174		35	683		38	606	0.402516		44	647		29	642	0.117244						73	0.01	0.49	0.11589	0.123658	1289	0.01	0.5	0.113538	0.118473	0.704887						73	3	35	20.6027	8.15772	1289	0
LCAT_rs5923	1	62	615	2	58	617	0.830624	3	71	640	0	49	592	0.0740417	0	56	633	3	64	599	0.130328	3	0.03	0.25	0.126667	0.112398	120	0.01	0.48	0.098	0.109011	1232	0.01	0.5	0.114862	0.11918	0.259642	3	21	27	23.6667	3.05505	120	4	37	20.45	8.15589	1232	0
LDLR_rs17242593	335	285	64	307	302	69	0.388979	335	307	76	307	280	57	0.562909	316	314	61	326	273	72	0.164121	642	0.01	0.49	0.114455	0.118149	587	0.01	0.5	0.113288	0.120196	133	0.01	0.42	0.111504	0.115624	0.753024	642	1	38	21.3037	8.13016	587	0	38	20.8944	8.15208	133	4
LDLR_rs17242656	43	224	417	47	249	382	0.223896	55	251	412	35	222	387	0.224655	42	258	391	48	215	408	0.112312	90	0.01	0.39	0.115444	0.114766	473	0.01	0.5	0.109641	0.117891	799	0.01	0.5	0.115845	0.119709	0.386609	90	4	38	22.5111	7.3366	473	0	38	20.8076	7.96463	799	0
LDLR_rs17242663	1	65	615	0	61	611	0.81539	1	63	647	0	63	579	0.638165	0	67	621	1	59	605	0.575302	1	0.29	0.29	0.29		126	0.01	0.48	0.128254	0.134123	1226	0.01	0.5	0.112643	0.117124	0.34869	1	26	26	26		126	2	38	21.6667	8.73705	1226	0
LDLR_rs17242718	12	146	526	9	163	506	0.412606	13	160	545	8	149	487	0.697951	11	150	530	10	159	502	0.672775	21	0.01	0.43	0.157143	0.136314	309	0.01	0.49	0.116472	0.123078	1032	0.01	0.5	0.111938	0.116933	0.499198	21	11	35	21.0476	7.8133	309	2	38	21.4984	8.30335	1032	0
LDLR_rs17242955	1	45	638	2	53	623	0.530029	1	44	673	2	54	588	0.207208	2	48	641	1	50	620	0.844946	3	0.03	0.12	0.0733333	0.0450925	98	0.01	0.5	0.112041	0.126099	1261	0.01	0.5	0.113886	0.118281	0.691973	3	19	28	22.6667	4.72582	98	0	38	20.8776	8.7252	1261	0
LDLR_rs17248755	29	211	444	24	214	439	0.79001	22	230	466	31	195	417	0.225266	33	224	433	20	201	450	0.106546	53	0.01	0.5	0.126226	0.138831	425	0.01	0.5	0.114541	0.117461	883	0.01	0.49	0.112582	0.118143	0.859657	53	6	37	20.1509	7.31278	425	0	38	21.1812	8.30138	883	0
LDLR_rs17248790	6	127	551	6	131	541	0.938774	2	144	572	10	114	520	0.0248035	7	145	539	5	113	553	0.114025	12	0.01	0.47	0.116667	0.151197	258	0.01	0.5	0.122597	0.118104	1092	0.01	0.49	0.11152	0.118491	0.0677756	12	6	20	15.9167	4.64089	258	2	38	21.0581	7.86366	1092	0
LDLR_rs17248861	13	168	503	8	156	514	0.42243	10	157	551	11	167	466	0.170768	10	170	511	11	154	506	0.747579	21	0.01	0.49	0.15	0.151625	324	0.01	0.5	0.111883	0.121789	1017	0.01	0.5	0.113481	0.116967	0.66656	21	4	35	22.4286	8.60565	324	0	38	21.213	8.40947	1017	0
LDLR_rs17248945	180	333	171	169	332	177	0.815808	183	339	196	166	326	152	0.269215	180	330	181	169	335	167	0.725344	349	0.01	0.5	0.115272	0.117773	665	0.01	0.5	0.114361	0.118738	348	0.01	0.49	0.110718	0.119881	0.507562	349	0	38	21.3696	8.02355	665	0	38	21.0361	8.24376	348	4
LEPR_rs10158579	509	165	10	515	148	15	0.400562	549	158	11	475	155	14	0.416623	521	158	12	503	155	13	0.959836	1024	0.01	0.5	0.114043	0.117953	313	0.01	0.48	0.112204	0.119954	25	0.01	0.44	0.1164	0.137897	0.721394	1024	0	38	21.3096	7.96184	313	1	38	21.1118	8.39702	25	6
LEPR_rs10493380	455	210	19	443	210	25	0.621436	459	238	21	439	182	23	0.133634	471	200	20	427	220	24	0.203024	898	0.01	0.5	0.112082	0.115152	420	0.01	0.49	0.117667	0.125458	44	0.01	0.47	0.107727	0.125751	0.793823	898	0	38	21.0902	7.83922	420	1	38	21.4905	8.47191	44	0
LEPR_rs1171269	49	284	351	37	282	359	0.417584	48	279	391	38	287	319	0.102727	49	285	357	37	281	353	0.499641	86	0.01	0.48	0.12407	0.124922	566	0.01	0.49	0.115371	0.11668	710	0.01	0.5	0.111042	0.119621	0.345632	86	6	35	21.5465	7.72415	566	0	38	21.0159	7.95439	710	0
LEPR_rs1171278	17	222	445	22	187	469	0.124846	17	211	490	22	198	424	0.407166	17	220	454	22	189	460	0.256065	39	0.01	0.44	0.12	0.126844	409	0.01	0.5	0.116626	0.122856	914	0.01	0.5	0.112068	0.116552	0.929394	39	6	35	19.5897	8.21974	409	0	38	21.3936	8.56887	914	0
LEPR_rs1171279	57	276	351	55	265	358	0.860613	65	277	376	47	264	333	0.410634	51	290	350	61	251	359	0.170995	112	0.01	0.48	0.110268	0.118834	541	0.01	0.5	0.112939	0.119943	709	0.01	0.49	0.114753	0.117898	0.545103	112	6	35	20.9196	7.75543	541	0	38	21.1128	8.27582	709	0
LEPR_rs11804091	486	182	16	491	173	14	0.834427	523	181	14	454	174	16	0.567975	487	191	13	490	164	17	0.317957	977	0.01	0.5	0.111873	0.116911	355	0.01	0.48	0.116451	0.124053	30	0.01	0.44	0.139	0.112445	0.416802	977	0	38	21.0921	7.98485	355	3	38	21.5775	8.31862	30	8
LEPR_rs1327118	136	352	196	142	338	196	0.83207	143	360	214	135	330	178	0.665893	145	339	207	133	351	185	0.446662	278	0.01	0.49	0.117266	0.120764	690	0.01	0.5	0.112841	0.118595	392	0.01	0.49	0.112985	0.117856	0.779309	278	2	38	20.6871	7.77847	690	0	38	21.2942	8.3596	392	0
LEPR_rs1327120	110	344	230	91	352	235	0.386337	111	358	249	90	338	216	0.586313	115	351	225	86	345	240	0.108713	201	0.01	0.48	0.119751	0.121043	696	0.01	0.5	0.112385	0.115335	465	0.01	0.5	0.112946	0.122786	0.6431	201	0	36	21.7114	7.57406	696	0	38	21.1552	8.06406	465	0
LEPR_rs1782763	276	335	72	291	319	68	0.64881	304	334	79	263	320	61	0.436566	283	334	74	284	320	66	0.812009	567	0.01	0.5	0.111393	0.121114	654	0.01	0.49	0.116055	0.1169	140	0.01	0.48	0.111143	0.118146	0.383809	567	0	38	21.224	8.37257	654	0	38	21.2492	7.96012	140	0
LEPR_rs1892534	103	312	268	105	332	241	0.358696	120	334	263	88	310	246	0.292883	94	332	264	114	312	245	0.224942	208	0.01	0.49	0.114231	0.118172	644	0.01	0.48	0.113804	0.119925	509	0.01	0.5	0.113418	0.117673	0.99041	208	0	38	20.9808	8.86995	644	0	38	20.8106	7.99133	509	0
LEPR_rs1938484	20	219	445	21	199	458	0.578759	22	205	491	19	213	412	0.193402	25	210	456	16	208	447	0.412339	41	0.01	0.41	0.127805	0.123643	418	0.01	0.49	0.112225	0.115333	903	0.01	0.5	0.113688	0.120108	0.591469	41	6	35	19.3171	8.18975	418	0	38	21.0335	8.05906	903	0
LEPR_rs2025805	128	350	206	143	351	183	0.34216	153	362	202	118	339	187	0.37953	127	355	209	144	346	180	0.221651	271	0.01	0.5	0.110443	0.118402	701	0.01	0.5	0.113666	0.119343	389	0.01	0.48	0.116118	0.118108	0.82234	271	0	38	21.0443	8.04558	701	0	38	21.3538	8.20855	389	0
LEPR_rs2376018	481	185	18	453	201	24	0.324403	471	228	19	463	158	23	0.00970937	493	181	17	441	205	25	0.0600541	934	0.01	0.5	0.112816	0.11633	386	0.01	0.49	0.118057	0.125612	42	0.01	0.41	0.0921429	0.10494	0.431394	934	0	38	21.2602	7.90307	386	1	38	21.2927	8.293	42	0
LEPR_rs3790426	29	236	419	33	227	418	0.818315	35	259	424	27	204	413	0.160472	27	248	416	35	215	421	0.207149	62	0.01	0.48	0.095	0.10354	463	0.01	0.5	0.110648	0.115343	837	0.01	0.5	0.116714	0.121522	0.408646	62	6	36	20.1452	6.92074	463	0	38	21.6739	7.92221	837	0
LEPR_rs3806318	345	291	48	334	297	47	0.898956	361	304	53	318	284	42	0.722965	337	302	52	342	286	43	0.607326	679	0.01	0.5	0.114035	0.117591	588	0.01	0.5	0.113248	0.120643	95	0.01	0.47	0.113579	0.115804	0.771504	679	0	38	21.3137	7.93485	588	0	38	21.2279	8.33636	95	2
LEPR_rs4655537	100	310	274	80	327	271	0.263657	80	340	298	100	297	247	0.0534318	80	345	266	100	292	279	0.0360967	180	0.01	0.5	0.120111	0.124164	637	0.01	0.5	0.112292	0.118932	545	0.01	0.49	0.113138	0.116751	0.798056	180	0	38	21.7111	7.97656	637	1	38	21.2276	8.09864	545	0
LEPR_rs4655539	203	343	138	214	335	129	0.72331	216	359	143	201	319	124	0.89494	197	351	143	220	327	124	0.204649	417	0.01	0.5	0.115731	0.124823	678	0.01	0.5	0.112404	0.116544	267	0.01	0.48	0.113633	0.114704	0.822535	417	0	38	21.1751	8.41476	678	1	38	21.2242	8.04822	267	0
LEPR_rs4655811	297	312	75	308	313	52	0.119643	329	317	69	276	308	58	0.404835	292	321	75	313	304	52	0.0773779	605	0.01	0.5	0.109455	0.118536	625	0.01	0.5	0.114816	0.117479	127	0.01	0.48	0.129528	0.12634	0.182162	605	0	38	21.1421	8.1922	625	1	38	21.1696	7.95077	127	0
LEPR_rs6588153	100	298	285	99	314	263	0.530501	112	317	286	87	295	262	0.528082	90	317	283	109	295	265	0.240901	199	0.01	0.49	0.115528	0.120082	612	0.01	0.48	0.113595	0.119347	548	0.01	0.5	0.113449	0.117911	0.963444	199	0	38	21.1809	8.80297	612	0	38	20.8023	8.07241	548	0
LEPR_rs6669785	1	65	618	1	67	610	0.927358	2	70	646	0	62	582	0.636318	2	58	631	0	74	597	0.0866027	2	0.03	0.04	0.035	0.00707107	132	0.01	0.48	0.100606	0.105068	1228	0.01	0.5	0.115195	0.120091	0.639569	2	17	19	18	1.41421	132	0	36	21.0303	7.68456	1228	0
LEPR_rs6673324	172	353	159	172	339	167	0.797421	190	359	169	154	333	157	0.557125	177	357	157	167	335	169	0.576109	344	0.01	0.5	0.115349	0.117753	692	0.01	0.49	0.109957	0.113938	326	0.01	0.5	0.119755	0.129265	0.905041	344	0	37	21.0465	7.28737	692	0	38	21.3237	8.30841	326	0
LEP_rs10249476	87	310	287	87	315	276	0.886996	85	327	306	89	298	257	0.428283	100	304	287	74	321	276	0.118785	174	0.01	0.49	0.125172	0.129037	625	0.01	0.48	0.114672	0.117368	563	0.01	0.5	0.108988	0.116803	0.350248	174	0	37	21.6897	8.31088	625	2	38	21.304	7.90227	563	0
LEP_rs2278815	228	323	133	201	337	140	0.346574	234	349	135	195	311	138	0.417861	215	333	143	214	327	130	0.82964	429	0.01	0.5	0.111352	0.11472	660	0.01	0.5	0.112742	0.119004	273	0.01	0.49	0.119524	0.12429	0.849067	429	0	38	20.9977	8.3592	660	2	38	21.3061	7.81308	273	0
LEP_rs3828942	132	350	202	119	330	229	0.228827	135	359	224	116	321	207	0.903478	130	334	227	121	346	204	0.481747	251	0.01	0.47	0.107689	0.112717	680	0.01	0.5	0.114647	0.120443	431	0.01	0.5	0.115592	0.119517	0.792307	251	0	36	20.8167	8.40228	680	2	38	21.3515	7.92909	431	0
LEP_rs7795794	3	79	602	6	90	582	0.364762	4	95	619	5	74	565	0.566315	5	83	603	4	86	581	0.842808	9	0.01	0.38	0.117778	0.13255	169	0.01	0.5	0.109172	0.12505	1184	0.01	0.5	0.114274	0.11777	0.469892	9	8	31	19.6667	7.95299	169	4	38	21.0118	8.23465	1184	0
LIPC_rs10518976	6	114	564	5	115	558	0.986859	4	134	580	7	95	542	0.0921801	5	111	575	6	118	547	0.720658	11	0.01	0.33	0.1	0.135941	229	0.01	0.49	0.108253	0.117217	1122	0.01	0.5	0.114902	0.118914	0.179958	11	12	30	19.8182	6.33748	229	2	37	20.5109	7.81789	1122	0
LIPC_rs10518977	0	41	643	1	37	640	0.684424	0	36	682	1	42	601	0.220211	1	38	652	0	40	631	0.771282	1	0.14	0.14	0.14		78	0.01	0.45	0.112564	0.118403	1283	0.01	0.5	0.11371	0.118819	0.749008	1	13	13	13		78	6	37	20.641	7.61743	1283	0
LIPC_rs10518984	651	33	0	625	51	2	0.0273466	675	42	1	601	42	1	0.82656	651	38	2	625	46	0	0.226985	1276	0.01	0.5	0.114976	0.11931	84	0.01	0.48	0.0957143	0.109041	2	0.03	0.03	0.03	0	0.12041	1276	0	38	21.2124	8.06092	84	0	35	21.25	8.48368	2	14
LIPC_rs11852861	126	319	238	125	317	235	1	136	341	240	115	295	233	0.559006	129	317	244	122	319	229	0.827913	251	0.01	0.48	0.12996	0.127284	636	0.01	0.5	0.110786	0.117698	473	0.01	0.5	0.109239	0.114957	0.0835787	251	1	37	21.5418	8.222	636	2	38	21.0912	8.03386	473	0
LIPC_rs12148268	131	349	204	142	353	183	0.453872	152	377	189	121	325	198	0.170061	146	370	175	127	332	212	0.0366137	273	0.01	0.48	0.108462	0.113859	702	0.01	0.5	0.108063	0.113666	387	0.01	0.5	0.127494	0.129697	0.1193	273	2	38	20.1685	7.98534	702	0	38	21.5285	8.1775	387	0
LIPC_rs12593880	14	162	508	8	151	519	0.348572	6	163	549	16	150	478	0.0505203	12	153	526	10	160	501	0.723905	22	0.01	0.48	0.121818	0.12054	313	0.01	0.5	0.118115	0.126133	1027	0.01	0.5	0.112132	0.116397	0.715643	22	11	33	22.6818	6.82004	313	1	38	21.492	8.13118	1027	0
LIPC_rs1869137	238	335	111	190	356	132	0.0202763	216	365	137	212	326	106	0.337754	195	367	129	233	324	114	0.035829	428	0.01	0.5	0.131542	0.13148	691	0.01	0.49	0.106715	0.112284	243	0.01	0.48	0.101934	0.109378	0.00852272	428	1	38	21.8645	7.96746	691	0	38	21.1505	8.26222	243	0
LIPC_rs1869138	553	124	7	542	130	6	0.863735	568	145	5	527	109	8	0.182485	562	122	7	533	132	6	0.615249	1095	0.01	0.5	0.113525	0.118322	254	0.01	0.49	0.116575	0.121006	13	0.01	0.33	0.0684615	0.104231	0.0282809	1095	0	38	21.232	8.13512	254	2	37	21.2756	7.84099	13	0
LIPC_rs1869144	264	299	121	254	324	100	0.205198	272	329	117	246	294	104	0.991679	267	312	112	251	311	109	0.884934	518	0.01	0.5	0.116737	0.119627	623	0.01	0.5	0.11122	0.118539	221	0.01	0.48	0.113348	0.117402	0.614865	518	0	38	21.3147	8.57437	623	1	38	20.9711	7.68381	221	0
LIPC_rs1968685	177	344	163	174	363	141	0.351478	191	369	158	160	338	146	0.764799	189	370	132	162	337	172	0.013512	351	0.01	0.5	0.108319	0.113393	707	0.01	0.49	0.109321	0.11532	304	0.01	0.5	0.129934	0.130834	0.0781739	351	2	38	20.4672	7.83461	707	0	38	21.5106	8.24541	304	1
LIPC_rs1968687	527	148	9	538	134	6	0.517604	556	155	7	509	127	8	0.659104	532	151	8	533	131	7	0.552961	1065	0.01	0.5	0.110582	0.114975	282	0.01	0.49	0.122234	0.130235	15	0.01	0.45	0.171333	0.138248	0.191178	1065	0	38	21.0507	8.0391	282	0	36	21.7872	8.27319	15	8
LIPC_rs1971544	3	118	563	5	125	548	0.625489	6	122	590	2	121	521	0.341939	8	136	547	0	107	564	0.00170907	8	0.01	0.28	0.06	0.0892829	243	0.01	0.5	0.113621	0.120725	1111	0.01	0.5	0.114059	0.118449	0.254523	8	7	31	18.875	8.39111	243	3	37	20.8354	7.68852	1111	0
LIPC_rs1973028	277	317	90	300	294	84	0.375601	308	325	85	269	286	89	0.55178	311	300	80	266	311	94	0.102659	577	0.01	0.49	0.106482	0.113863	611	0.01	0.5	0.117545	0.121976	174	0.01	0.5	0.123851	0.122099	0.128944	577	0	38	20.7227	7.82132	611	0	38	21.3191	8.33487	174	1
LIPC_rs2242064	82	281	321	76	287	315	0.86156	82	291	345	76	277	291	0.563962	79	291	321	79	277	315	0.948614	158	0.01	0.49	0.111709	0.118096	568	0.01	0.5	0.107887	0.116502	636	0.01	0.5	0.119308	0.120723	0.119664	158	0	37	21.7025	8.53581	568	1	38	21.2482	8.02158	636	1
LIPC_rs2899631	41	248	395	33	256	389	0.607819	36	278	404	38	226	380	0.340454	35	268	388	39	236	396	0.362431	74	0.01	0.48	0.122027	0.119175	504	0.01	0.48	0.108135	0.112942	784	0.01	0.5	0.116429	0.12224	0.531628	74	0	38	21.9595	8.16514	504	1	38	21.2222	7.64536	784	0
LIPC_rs2899632	31	206	447	18	211	449	0.177868	26	221	471	23	196	425	0.989084	23	194	474	26	223	422	0.0851637	49	0.01	0.4	0.123673	0.11465	417	0.01	0.5	0.11506	0.120946	896	0.01	0.5	0.112467	0.117974	0.469535	49	4	35	21.6939	7.63	417	1	38	21.5755	7.89228	896	0
LIPC_rs3825776	317	305	62	313	299	66	0.910276	342	307	69	288	297	59	0.457642	334	300	57	296	304	71	0.171071	630	0.01	0.5	0.111746	0.118354	604	0.01	0.5	0.11245	0.117573	128	0.01	0.48	0.128828	0.125508	0.313742	630	2	38	20.6635	7.97798	604	0	38	21.4272	8.22545	128	0
LIPC_rs3829460	78	265	341	74	284	320	0.499202	78	298	342	74	251	319	0.631785	76	280	335	76	269	326	0.97506	152	0.01	0.49	0.112961	0.117512	549	0.01	0.5	0.106557	0.11575	661	0.01	0.5	0.119728	0.121232	0.055205	152	0	37	21.5	8.6131	549	1	38	21.3406	8.07055	661	3
LIPC_rs3829463		19	665		19	659	1		21	697		17	627	0.869412		22	669		16	655	0.413029						38	0.01	0.48	0.0965789	0.13068	1324	0.01	0.5	0.114154	0.118367	0.126204						38	3	35	20.3421	8.59062	1324	0
LIPC_rs4774297	198	319	167	178	340	160	0.396322	184	356	178	192	303	149	0.225258	189	332	170	187	327	157	0.868732	376	0.01	0.5	0.115878	0.120432	659	0.01	0.49	0.106798	0.114274	327	0.01	0.48	0.124954	0.124752	0.0909012	376	2	38	22.3351	8.03953	659	0	38	20.7238	8.0773	327	0
LIPC_rs4775048	525	151	8	560	109	9	0.0171603	577	134	7	508	126	10	0.564165	548	132	11	537	128	6	0.540396	1085	0.01	0.5	0.110608	0.117361	260	0.01	0.5	0.124692	0.123433	17	0.01	0.39	0.14	0.12485	0.150418	1085	0	38	21.2074	8.03592	260	2	37	21.2462	8.28504	17	7
LIPC_rs4775058	0	40	644	1	37	640	0.770223	0	34	684	1	43	600	0.112758	1	38	652	0	39	632	0.906477	1	0.14	0.14	0.14		77	0.01	0.45	0.112987	0.11912	1284	0.01	0.5	0.113684	0.118777	0.741787	1	13	13	13		77	6	37	20.6883	7.58333	1284	0
LIPC_rs4775072	1	39	644	0	34	644	0.630879	0	40	678	1	33	610	0.715057	0	39	652	1	34	636	0.631796	1	0.3	0.3	0.3		73	0.01	0.47	0.122877	0.12823	1288	0.01	0.5	0.112997	0.118112	0.384126	1	20	20	20		73	4	35	20.8082	7.91036	1288	0
LIPC_rs4775073	11	179	494	11	158	509	0.487432	9	188	521	13	149	482	0.247988	12	177	502	10	160	501	0.699129	22	0.01	0.45	0.121364	0.133961	337	0.01	0.49	0.117092	0.125479	1003	0.01	0.5	0.112343	0.116097	0.91501	22	3	35	20.6818	9.17235	337	0	38	21.5312	8.32701	1003	0
LIPC_rs483140	58	271	355	57	293	328	0.383439	62	307	349	53	257	334	0.481159	61	278	352	54	286	331	0.639357	115	0.01	0.45	0.119043	0.114769	564	0.01	0.48	0.110053	0.113873	683	0.01	0.5	0.115739	0.123273	0.763332	115	4	38	20.9043	7.90844	564	0	38	20.9415	8.00922	683	1
LIPC_rs6083	295	303	86	293	287	98	0.552634	309	310	99	279	280	85	0.962424	297	291	103	291	299	81	0.286101	588	0.01	0.49	0.112772	0.113862	590	0.01	0.5	0.118186	0.126242	184	0.01	0.44	0.102011	0.108264	0.543889	588	1	38	21.1735	7.96888	590	0	38	21.2661	8.07974	184	0
LIPC_rs6494006	594	89	1	604	71	3	0.235611	638	77	3	560	83	1	0.319093	612	76	3	586	84	1	0.414528	1198	0.01	0.5	0.113806	0.118599	160	0.01	0.5	0.112875	0.120452	4	0.03	0.26	0.1025	0.108743	0.973896	1198	0	38	21.2412	8.08741	160	1	38	20.95	8.06327	4	11
LIPC_rs690	258	320	106	236	347	95	0.267631	276	332	110	218	335	91	0.100236	251	347	93	243	320	108	0.357166	494	0.01	0.49	0.113219	0.117198	667	0.01	0.5	0.109565	0.115964	201	0.01	0.5	0.128358	0.13033	0.209816	494	3	38	21.4312	7.925	667	0	38	21.027	8.18146	201	0
LIPC_rs7178362	520	141	23	505	160	13	0.127186	545	154	19	480	147	17	0.838862	515	154	22	510	147	14	0.434057	1025	0.01	0.5	0.113737	0.117368	301	0.01	0.5	0.111462	0.122732	36	0.01	0.44	0.13	0.124648	0.404052	1025	0	38	21.0722	7.98501	301	0	38	21.4718	8.24116	36	4
LIPC_rs8028759	298	299	87	306	309	63	0.131247	310	334	74	294	274	76	0.309331	289	321	81	315	287	69	0.159785	604	0.01	0.5	0.112086	0.12227	608	0.01	0.48	0.113191	0.113889	150	0.01	0.5	0.121933	0.123694	0.240068	604	0	38	21.0315	8.34481	608	1	38	21.3602	7.77464	150	0
LIPC_rs8034802	50	289	345	58	283	337	0.702025	66	311	341	42	261	341	0.058655	60	297	334	48	275	348	0.335703	108	0.01	0.48	0.11787	0.127829	572	0.01	0.49	0.116259	0.120537	682	0.01	0.5	0.110821	0.115748	0.763764	108	6	35	20.2222	7.96527	572	0	38	21.25	7.90079	682	0
LIPC_rs871804	14	149	521	20	158	500	0.435363	20	172	526	14	135	495	0.289827	17	157	517	17	150	504	0.985818	34	0.01	0.38	0.113529	0.105884	307	0.01	0.5	0.116612	0.123037	1021	0.01	0.5	0.112782	0.117881	0.84065	34	5	36	20.4706	8.43598	307	3	37	20.5537	7.82778	1021	0
LIPC_rs9652472	615	66	3	617	59	2	0.713823	645	71	2	587	54	3	0.579271	621	67	3	611	58	2	0.713695	1232	0.01	0.5	0.112557	0.117208	125	0.01	0.48	0.12496	0.133124	5	0.02	0.3	0.104	0.115022	0.962255	1232	0	38	21.2484	8.10031	125	3	35	20.824	8.03728	5	15
LPL_rs1031045		22	662		21	657	1		19	699		24	620	0.279483		18	673		25	646	0.278597						43	0.01	0.39	0.0955814	0.0958745	1319	0.01	0.5	0.114253	0.119366	0.270315						43	0	35	19.8605	8.52889	1319	0
LPL_rs1059507	20	190	471	13	169	494	0.194709	18	187	509	15	172	456	0.946229	17	194	478	16	165	487	0.347575	33	0.01	0.48	0.156364	0.129803	359	0.01	0.5	0.120919	0.121423	965	0.01	0.5	0.10972	0.117264	0.011114	33	8	35	22.5758	8.23495	359	0	38	21.6435	8.01088	965	0
LPL_rs17410783	398	242	44	391	250	37	0.680948	428	241	49	361	251	32	0.0658657	402	244	45	387	248	36	0.590538	789	0.01	0.5	0.115513	0.118365	492	0.01	0.48	0.109146	0.118208	81	0.01	0.49	0.123086	0.125436	0.257546	789	0	38	20.9531	8.06141	492	1	38	21.6768	8.15677	81	2
LPL_rs253	171	323	190	126	353	199	0.0154974	156	354	208	141	322	181	0.943136	161	343	187	136	333	202	0.283085	297	0.01	0.49	0.11633	0.119638	676	0.01	0.5	0.11247	0.115218	389	0.01	0.5	0.113702	0.124137	0.656455	297	0	38	21.037	8.17598	676	0	38	21.4112	7.93284	389	1
LPL_rs263	30	206	448	16	204	458	0.115517	24	220	474	22	190	432	0.902997	27	217	447	19	193	459	0.268383	46	0.01	0.41	0.12	0.118171	410	0.01	0.5	0.113244	0.117897	906	0.01	0.5	0.113532	0.119225	0.920127	46	0	38	21.7174	8.73222	410	3	38	21.2	7.89658	906	0
LPL_rs264	21	172	491	11	176	491	0.218025	17	189	512	15	159	470	0.792118	19	182	490	13	166	492	0.456156	32	0.01	0.41	0.13	0.121973	348	0.01	0.5	0.11069	0.117349	982	0.01	0.5	0.114185	0.119155	0.64693	32	0	38	22.875	8.46911	348	3	38	21.3075	7.87732	982	0
LPL_rs270	17	184	483	23	173	482	0.542698	24	179	515	16	178	450	0.37538	21	182	488	19	175	477	0.962998	40	0.01	0.47	0.108	0.119082	357	0.01	0.49	0.122185	0.124536	965	0.01	0.5	0.110746	0.116439	0.542808	40	2	33	20.625	7.45478	357	1	38	21.2633	8.08683	965	0
LPL_rs281	336	281	66	373	251	53	0.0819614	382	273	63	327	259	56	0.675111	357	268	65	352	264	54	0.680791	709	0.01	0.5	0.107701	0.113976	532	0.01	0.5	0.120301	0.122083	119	0.01	0.47	0.117479	0.127034	0.218136	709	0	38	20.969	8.08686	532	0	38	21.4793	7.97722	119	2
LPL_rs283	37	234	413	35	209	434	0.380878	39	237	442	33	206	405	0.881408	42	227	422	30	216	425	0.369142	72	0.01	0.47	0.108472	0.12651	443	0.01	0.49	0.120226	0.124651	847	0.01	0.5	0.110673	0.114787	0.521478	72	2	36	20.1806	8.06545	443	0	38	21.7788	8.13494	847	0
LPL_rs295	379	258	47	417	228	33	0.0480382	419	258	41	377	228	39	0.950626	399	249	43	397	237	37	0.789904	796	0.01	0.5	0.11	0.118594	486	0.01	0.5	0.116811	0.119331	80	0.01	0.48	0.131	0.115414	0.0469493	796	0	38	20.946	8.12579	486	0	38	21.6049	8.06752	80	0
LPL_rs312	13	168	503	7	126	545	0.00854145	10	154	554	10	140	494	0.954472	10	155	526	10	139	522	0.754824	20	0.01	0.48	0.1565	0.133546	294	0.01	0.5	0.127347	0.123754	1048	0.01	0.5	0.109008	0.116618	0.00390522	20	8	35	23.1	8.04527	294	0	38	22.0374	8.14221	1048	0
LPL_rs316	14	167	503	7	126	545	0.00728124	11	153	554	10	140	494	0.981733	11	155	525	10	138	523	0.686559	21	0.01	0.48	0.150952	0.132624	293	0.01	0.5	0.127474	0.123974	1048	0.01	0.5	0.109055	0.116592	0.00580427	21	8	35	23.6667	8.26035	293	0	38	22.0034	8.1137	1048	0
LPL_rs326	323	289	72	355	266	57	0.124184	352	299	67	326	256	62	0.78953	330	288	73	348	267	56	0.200543	678	0.01	0.5	0.110236	0.119841	555	0.01	0.5	0.113676	0.116716	129	0.01	0.49	0.131628	0.120551	0.0320293	678	0	38	20.941	8.21855	555	0	38	21.5135	7.94165	129	0
LPL_rs330	21	200	461	15	179	483	0.272987	20	196	500	16	183	444	0.866239	17	205	467	19	174	477	0.293616	36	0.01	0.48	0.148333	0.127447	379	0.01	0.5	0.119551	0.119841	944	0.01	0.5	0.109958	0.117702	0.0178714	36	8	35	22	8.18361	379	0	38	21.6385	7.99826	944	0
LPL_rs343	7	114	563	6	104	568	0.792346	10	114	594	3	104	537	0.223235	6	116	569	7	102	562	0.707507	13	0.01	0.33	0.131538	0.106681	218	0.01	0.45	0.114725	0.119531	1131	0.01	0.5	0.113254	0.118762	0.651132	13	13	33	22.5385	6.91153	218	0	38	21.0367	7.95022	1131	0
LPL_rs4922115	19	190	475	13	170	495	0.269476	17	190	511	15	170	459	1	17	193	481	15	167	489	0.414413	32	0.01	0.48	0.160938	0.12915	360	0.01	0.5	0.119306	0.12053	970	0.01	0.5	0.11001	0.117382	0.00800576	32	8	35	22.5938	8.36606	360	0	38	21.5389	7.9268	970	0
LPL_rs8176337	46	256	382	36	240	402	0.329958	47	260	411	35	236	373	0.699298	46	244	401	36	252	383	0.489611	82	0.01	0.48	0.0996341	0.100326	496	0.01	0.5	0.11252	0.11603	784	0.01	0.5	0.115855	0.122133	0.880859	82	5	38	21.6585	7.80981	496	0	38	21.0282	8.06359	784	1
MBL2_rs1838065	281	297	102	248	326	96	0.172207	284	320	109	245	303	89	0.583126	281	308	97	248	315	101	0.39635	529	0.01	0.48	0.115369	0.11896	623	0.01	0.5	0.113162	0.118808	198	0.01	0.49	0.112929	0.119102	0.98431	529	0	38	21.4045	8.05349	623	0	38	21.1429	8.17713	198	4
MBL2_rs1838066	281	301	102	248	334	96	0.139596	284	325	109	245	310	89	0.545556	281	313	97	248	322	101	0.374798	529	0.01	0.48	0.115369	0.11896	635	0.01	0.5	0.112472	0.118552	198	0.01	0.49	0.112929	0.119102	0.953116	529	0	38	21.4045	8.05349	635	0	38	21.074	8.19282	198	4
MBL2_rs2506	362	283	39	379	250	49	0.16933	367	304	47	374	229	41	0.0295096	379	265	47	362	268	41	0.778463	741	0.01	0.5	0.108489	0.113777	533	0.01	0.5	0.121595	0.124763	88	0.01	0.45	0.109205	0.120537	0.316235	741	0	38	21.085	7.90122	533	1	38	21.4278	8.34235	88	2
MBL2_rs930507	484	180	20	462	196	20	0.551519	506	196	16	440	180	24	0.234278	477	188	26	469	188	14	0.18555	946	0.01	0.49	0.114968	0.118277	376	0.01	0.5	0.10984	0.119197	40	0.01	0.5	0.11875	0.126434	0.497548	946	0	38	21.4101	8.06842	376	1	38	20.7261	8.20874	40	0
MC4R_rs2229616		25	659		23	655	0.883417		31	687		17	627	0.105996		30	661		18	653	0.106946						48	0.01	0.36	0.0995833	0.0987789	1314	0.01	0.5	0.114178	0.119376	0.551873						48	7	38	22.8958	8.20804	1314	0
MC4R_rs9966412	11	142	531	9	124	545	0.467099	13	153	552	7	113	524	0.0999857	9	129	553	11	137	523	0.603777	20	0.01	0.43	0.135	0.125719	266	0.01	0.5	0.105451	0.114799	1076	0.01	0.5	0.115297	0.119522	0.196011	20	0	37	24	10.3415	266	0	38	21.3722	7.65633	1076	0
MFGE8_rs1878326	270	316	98	269	326	83	0.499776	291	326	101	248	316	80	0.367114	268	328	95	271	314	86	0.786592	539	0.01	0.5	0.109017	0.115761	642	0.01	0.49	0.118598	0.123489	181	0.01	0.5	0.11	0.109681	0.529902	539	0	38	21.5176	8.17997	642	0	38	21.014	8.03006	181	1
MFGE8_rs2280214	7	119	558	9	136	533	0.390319	11	139	568	5	116	523	0.344788	8	127	556	8	128	535	0.956789	16	0.03	0.32	0.075625	0.0831039	255	0.01	0.49	0.110706	0.120584	1091	0.01	0.5	0.114913	0.118692	0.44375	16	9	38	19.125	7.45542	255	0	37	20.9882	8.32153	1091	0
MFGE8_rs3743388	72	292	320	64	300	314	0.739403	77	300	341	59	292	293	0.34747	64	292	335	72	300	299	0.310522	136	0.01	0.5	0.122059	0.124044	592	0.01	0.48	0.114645	0.119106	634	0.01	0.5	0.110946	0.117258	0.886635	136	0	37	20.9191	8.3187	592	1	38	21.6351	8.0585	634	0
MFGE8_rs3743391	2	47	635	0	43	635	0.487009	1	46	671	1	44	599	0.913785	1	51	639	1	39	631	0.615346	2	0.2	0.22	0.21	0.0141421	90	0.01	0.48	0.121	0.118246	1270	0.01	0.5	0.112992	0.118804	0.234039	2	25	27	26	1.41421	90	6	37	22.5111	7.0412	1270	0
MFGE8_rs3784751	244	319	121	244	325	109	0.72227	254	337	127	234	307	103	0.705672	243	338	110	245	306	120	0.418023	488	0.01	0.5	0.119078	0.122985	644	0.01	0.49	0.111242	0.118256	230	0.01	0.49	0.108957	0.110544	0.640692	488	0	38	21.498	7.85286	644	0	38	20.7236	8.17621	230	4
MMP2_rs17859814	48	252	384	35	255	388	0.365084	50	268	400	33	239	372	0.339244	40	264	387	43	243	385	0.713735	83	0.01	0.49	0.124337	0.126068	507	0.01	0.5	0.11497	0.1191	772	0.01	0.5	0.111658	0.117725	0.824842	83	2	37	22.0723	7.78959	507	0	38	20.8817	8.27383	772	0
MMP2_rs17859821	2	138	544	5	151	522	0.324088	6	148	564	1	141	502	0.201065	3	148	540	4	141	526	0.91341	7	0.03	0.15	0.0557143	0.0454082	289	0.01	0.5	0.108304	0.114711	1066	0.01	0.5	0.115497	0.120024	0.627472	7	8	27	19.8571	7.10466	289	0	38	21.1834	8.01675	1066	0
MMP2_rs17859850	277	298	109	294	300	84	0.155743	293	321	104	278	277	89	0.682171	276	312	103	295	286	90	0.310923	571	0.01	0.49	0.11021	0.115199	598	0.01	0.5	0.113495	0.120663	193	0.01	0.48	0.124404	0.122775	0.268872	571	0	38	21.1261	8.05909	598	0	38	21.1171	8.21301	193	2
MMP2_rs17859883	275	299	110	290	303	85	0.165088	291	323	104	274	279	91	0.749143	274	313	104	291	289	91	0.357466	565	0.01	0.49	0.110531	0.115587	602	0.01	0.5	0.113389	0.120402	195	0.01	0.48	0.12359	0.122413	0.29734	565	0	38	21.1204	8.09253	602	0	38	21.1346	8.18546	195	2
MMP2_rs17859898	584	97	3	598	80	0	0.0787476	630	85	3	552	92	0	0.107236	601	88	2	581	89	1	0.903605	1182	0.01	0.5	0.111692	0.117411	177	0.01	0.48	0.123559	0.124162	3	0.16	0.48	0.306667	0.161658	0.0445889	1182	0	38	21.1751	8.13324	177	2	37	21.4463	7.75833	3	12
MMP2_rs17859906	198	318	168	212	336	130	0.0554092	208	355	155	202	299	143	0.513718	201	326	164	209	328	134	0.234007	410	0.01	0.49	0.107341	0.113889	654	0.01	0.5	0.11555	0.120551	298	0.01	0.49	0.118221	0.121161	0.370505	410	0	38	20.9537	8.01681	654	0	38	21.0902	8.23131	298	2
MMP2_rs17859935	16	202	466	10	206	462	0.52034	16	207	495	10	201	433	0.463406	10	212	469	16	196	459	0.397106	26	0.01	0.48	0.108077	0.128562	408	0.01	0.5	0.114461	0.120664	928	0.01	0.5	0.11347	0.117688	0.64464	26	8	33	20.0385	7.18599	408	0	38	21.1495	7.97013	928	0
MMP2_rs17859953	82	314	279	98	330	248	0.164671	92	345	274	88	299	253	0.784525	88	318	278	92	326	249	0.45826	180	0.01	0.48	0.107556	0.113505	644	0.01	0.5	0.112298	0.117615	527	0.01	0.5	0.115712	0.120455	0.658819	180	4	38	20.4111	8.26907	644	0	38	21.2935	8.06732	527	0
MMP2_rs17859970	14	180	490	7	182	488	0.340216	13	182	523	8	180	455	0.421591	7	189	494	14	173	484	0.236702	21	0.01	0.48	0.122381	0.136891	362	0.01	0.5	0.114724	0.120631	978	0.01	0.5	0.11319	0.117717	0.976963	21	10	33	21	7.28697	362	0	38	20.9724	7.91711	978	0
MMP2_rs17859977	659	25		650	28		0.676342	688	30		621	23		0.578173	663	28		646	25		0.780879	1309	0.01	0.5	0.114072	0.118796	53	0.01	0.47	0.103585	0.117262						0.34728	1309	0	38	21.1917	8.07111	53	7	35	21.5283	8.43437
MMP2_rs17860030	156	330	197	152	323	203	0.910181	164	356	198	144	297	202	0.280107	148	351	192	160	302	208	0.109481	308	0.01	0.48	0.111916	0.117645	653	0.01	0.5	0.1134	0.119516	400	0.01	0.48	0.115325	0.118609	0.950222	308	0	38	21.0779	8.40043	653	0	38	21.3323	8.05968	400	0
MMP9_rs2250889	1	53	630	1	63	614	0.665861	1	63	654	1	53	590	0.885651	2	58	631	0	58	613	0.602448	2	0.03	0.09	0.06	0.0424264	116	0.01	0.48	0.0857759	0.0956365	1244	0.01	0.5	0.11635	0.120408	0.0544062	2	16	19	17.5	2.12132	116	2	37	20.7414	8.69995	1244	0
MMP9_rs3918241	487	181	16	505	164	9	0.221678	515	192	11	477	153	14	0.338644	499	180	12	493	165	13	0.813357	992	0.01	0.5	0.112893	0.11906	345	0.01	0.49	0.115652	0.117291	25	0.01	0.45	0.1168	0.128638	0.813619	992	0	38	20.9476	8.07491	345	0	38	21.7768	8.03116	25	7
MMP9_rs3918262	435	215	34	445	209	24	0.392256	459	226	33	421	198	25	0.750205	460	203	28	420	221	30	0.304711	880	0.01	0.5	0.112659	0.118639	424	0.01	0.5	0.114175	0.117782	58	0.01	0.45	0.125172	0.127778	0.818023	880	0	38	21.1705	8.24665	424	1	38	21.2995	7.93516	58	4
MTSS1_rs10956189	426	227	31	423	223	32	0.981124	446	243	29	403	207	34	0.49237	431	230	30	418	220	33	0.883531	849	0.01	0.5	0.114582	0.121061	450	0.01	0.49	0.111756	0.114799	63	0.01	0.5	0.114921	0.115826	0.939568	849	0	38	21.3204	8.13092	450	0	38	21.0289	8.02927	63	2
MTSS1_rs1131024	508	164	12	511	157	10	0.833507	544	167	7	475	154	15	0.127571	515	161	15	504	160	7	0.270314	1019	0.01	0.5	0.110147	0.115416	321	0.01	0.5	0.125919	0.128983	22	0.01	0.38	0.0977273	0.104377	0.345117	1019	0	38	21.2787	8.10932	321	1	38	20.9346	8.10857	22	7
MTSS1_rs3829037	409	251	24	416	228	34	0.235797	435	258	25	390	221	33	0.299006	419	238	34	406	241	24	0.435414	825	0.01	0.5	0.109091	0.114429	479	0.01	0.5	0.121065	0.124792	58	0.01	0.41	0.117586	0.125786	0.381855	825	0	38	21.1067	8.07839	479	1	38	21.334	8.2112	58	7
MT_rs138903	323	297	64	306	316	56	0.455675	326	336	56	303	277	64	0.218897	325	310	56	304	303	64	0.598406	629	0.01	0.5	0.113704	0.117281	613	0.01	0.5	0.114584	0.120801	120	0.01	0.45	0.10875	0.116219	0.862161	629	0	38	21.248	8.10847	613	0	38	21.1909	8.10719	120	2
MT_rs2072855	66	284	334	57	302	319	0.466614	57	315	346	66	271	307	0.322464	59	313	319	64	273	334	0.223371	123	0.01	0.48	0.111301	0.113585	586	0.01	0.49	0.115546	0.122439	653	0.01	0.5	0.11242	0.116387	0.937913	123	0	36	20.4228	7.69714	586	0	38	21.3805	8.27664	653	1
MT_rs4988435	30	197	457	23	206	448	0.553984	23	215	480	30	188	425	0.390757	23	209	458	30	194	447	0.511776	53	0.01	0.38	0.0875472	0.102092	403	0.01	0.49	0.11727	0.122123	905	0.01	0.5	0.113481	0.11802	0.146882	53	2	36	19.7547	7.72336	403	0	38	21.2804	8.32447	905	0
MT_rs4988443	2	40	642	0	21	657	0.0104524	1	32	685	1	29	614	1	1	27	663	1	34	636	0.679436	2	0.02	0.08	0.05	0.0424264	61	0.01	0.5	0.131967	0.138538	1299	0.01	0.5	0.112902	0.11775	0.431467	2	10	20	15	7.07107	61	7	37	21.1803	7.67139	1299	0
MT_rs6003071	147	333	204	137	344	197	0.725738	134	366	218	150	311	183	0.110338	135	357	199	149	320	202	0.29939	284	0.01	0.48	0.102535	0.106283	677	0.01	0.49	0.119941	0.122321	401	0.01	0.5	0.110948	0.120452	0.145472	284	0	38	20.8908	7.95029	677	0	38	21.579	8.14759	401	0
MT_rs872842	514	161	9	518	151	9	0.833163	534	174	10	498	138	8	0.435386	503	182	6	529	130	12	0.00404495	1032	0.01	0.5	0.110068	0.117117	312	0.01	0.49	0.127179	0.124662	18	0.01	0.28	0.0855556	0.0841023	0.0787457	1032	0	38	21.0388	8.12239	312	0	38	21.7372	7.97594	18	10
NDUFA10_rs4149549	21	184	479	12	176	490	0.257237	14	194	510	19	166	459	0.45259	15	185	491	18	175	478	0.813693	33	0.01	0.48	0.139697	0.14262	360	0.01	0.5	0.11225	0.115745	969	0.01	0.5	0.113302	0.118949	0.69188	33	6	36	22.9394	9.46355	360	0	38	21.0667	8.19443	969	0
NDUFA10_rs4853976	243	312	129	239	310	129	0.994681	262	326	130	220	296	128	0.573134	244	325	122	238	297	136	0.406804	482	0.01	0.5	0.11332	0.120955	622	0.01	0.5	0.111045	0.115867	258	0.01	0.48	0.12062	0.121417	0.506725	482	0	38	20.9834	8.21209	622	0	38	21.1897	8.12895	258	2
NDUFA10_rs6709170	175	333	176	167	335	176	0.922127	170	353	195	172	315	157	0.323413	165	344	182	177	324	170	0.571307	342	0.01	0.5	0.119035	0.121518	668	0.01	0.49	0.113353	0.118575	352	0.01	0.5	0.109034	0.116314	0.614959	342	4	38	21.5965	7.88932	668	0	38	21.1287	8.37331	352	0
NDUFA10_rs6732752	19	179	477	16	173	486	0.805782	19	182	509	16	170	454	0.928155	22	168	493	13	184	470	0.187458	35	0.01	0.48	0.132286	0.126865	352	0.01	0.49	0.115398	0.121343	963	0.01	0.5	0.112648	0.117887	0.563199	35	10	36	21.2857	8.04609	352	2	38	20.9659	7.9517	963	0
NDUFA10_rs7596788	48	255	381	57	268	353	0.343824	55	298	365	50	225	369	0.0393746	54	274	363	51	249	371	0.589726	105	0.01	0.5	0.0990476	0.11998	523	0.01	0.49	0.108853	0.113749	734	0.01	0.5	0.119183	0.121785	0.245938	105	4	38	20.4762	8.02412	523	0	38	20.9924	8.2469	734	2
NDUFA10_rs878924	128	321	235	129	322	227	0.945191	137	353	228	120	290	234	0.187075	130	336	225	127	307	237	0.50824	257	0.01	0.5	0.1093	0.121887	643	0.01	0.5	0.110467	0.113822	462	0.01	0.49	0.120541	0.12345	0.467374	257	0	38	21.0778	8.4817	643	0	38	21.0389	8.08849	462	2
NDUFA10_rs958960	346	280	58	327	286	65	0.619192	339	313	66	334	253	57	0.220341	328	300	63	345	266	60	0.32147	673	0.01	0.5	0.120074	0.123447	566	0.01	0.49	0.109364	0.112379	123	0.01	0.5	0.098374	0.119311	0.258081	673	2	38	21.3982	7.91597	566	0	38	21.076	8.25069	123	4
NDUFA13_rs10422819	74	303	307	72	321	284	0.493598	72	329	316	74	295	275	0.665842	67	317	307	79	307	284	0.428666	146	0.01	0.5	0.109658	0.121459	624	0.01	0.49	0.110497	0.117571	591	0.01	0.5	0.118139	0.11933	0.347408	146	0	37	20.0342	8.13542	624	1	38	21.4311	8.10317	591	0
NDUFA2_rs3822356	432	218	34	420	219	39	0.781147	458	223	37	394	214	36	0.611785	435	220	36	417	217	37	0.939034	852	0.01	0.49	0.113146	0.117692	437	0.01	0.5	0.116293	0.122105	73	0.01	0.4	0.103973	0.110639	0.573495	852	1	38	21.162	7.98041	437	0	38	21.4439	8.14291	73	0
NDUFA2_rs702398	223	335	126	237	320	121	0.657829	236	340	142	224	315	105	0.246698	233	348	110	227	307	137	0.0710699	460	0.01	0.5	0.112457	0.119525	655	0.01	0.49	0.114458	0.119566	247	0.01	0.5	0.113806	0.115323	0.910661	460	1	38	20.9522	7.9693	655	0	38	21.5328	8.14632	247	0
NDUFA3_rs12609379	23	230	431	30	223	425	0.597219	26	233	459	27	220	397	0.640801	24	223	444	29	230	412	0.472907	53	0.01	0.36	0.085283	0.0864604	453	0.01	0.49	0.113377	0.117394	856	0.01	0.5	0.115572	0.12099	0.719655	53	9	35	21.8491	5.9788	453	0	38	20.585	8.0839	856	0
NDUFA3_rs254259	115	344	225	123	323	232	0.600767	123	349	246	115	318	211	0.831057	119	334	238	119	333	219	0.782635	238	0.01	0.49	0.106134	0.108454	667	0.01	0.48	0.114828	0.118969	457	0.01	0.5	0.115886	0.123447	0.85389	238	0	37	20.9706	7.32973	667	1	38	20.7421	8.13675	457	0
NDUFA3_rs254262	25	258	401	34	219	425	0.0740844	33	252	433	26	225	393	0.885543	30	242	419	29	235	407	1	59	0.01	0.48	0.129322	0.136847	477	0.01	0.49	0.112453	0.113549	826	0.01	0.5	0.113245	0.120307	0.618172	59	7	33	21.2881	6.93579	477	0	38	20.7128	8.10406	826	0
NDUFA3_rs663569	656	28		649	29		0.893042	689	29		616	28		0.788008	662	29		643	28		1	1305	0.01	0.5	0.114513	0.1195	57	0.01	0.41	0.0942105	0.0977962						0.233438	1305	0	38	21.2475	8.05003	57	4	37	20.2281	8.81561
NDUFA4_rs1616965	143	356	184	138	347	193	0.822306	150	378	190	131	325	187	0.555026	150	349	191	131	354	186	0.571242	281	0.01	0.5	0.118327	0.124095	703	0.01	0.5	0.113713	0.116562	377	0.01	0.49	0.110239	0.11891	0.593283	281	2	38	21.9395	7.85311	703	0	38	20.909	8.0704	377	0
NDUFA4_rs1681289	7	128	549	8	158	512	0.103295	5	138	575	10	148	486	0.0625757	7	156	528	8	130	533	0.33172	15	0.01	0.33	0.123333	0.108211	286	0.01	0.48	0.107203	0.113226	1061	0.01	0.5	0.115269	0.120321	0.690068	15	6	35	20.2	8.58737	286	0	38	20.5874	8.13382	1061	0
NDUFA4_rs922901	128	311	245	98	336	244	0.0858288	109	352	257	117	295	232	0.278703	111	325	255	115	322	234	0.708943	226	0.01	0.49	0.111903	0.119061	647	0.01	0.5	0.106445	0.112874	489	0.01	0.5	0.124029	0.125391	0.0420882	226	3	38	21.6726	8.03541	647	0	38	20.6414	8.28319	489	0
NDUFA5_rs12539809	451	206	27	441	204	33	0.715835	486	204	28	406	206	32	0.177421	443	219	29	449	191	31	0.420862	892	0.01	0.5	0.115157	0.120495	410	0.01	0.48	0.112098	0.115763	60	0.01	0.48	0.102167	0.112838	0.723583	892	0	38	21.1603	8.06901	410	2	38	21.7488	8.03068	60	4
NDUFA5_rs4147632	87	323	274	75	297	306	0.156086	82	334	302	80	286	278	0.701537	80	312	299	82	308	281	0.85494	162	0.01	0.43	0.127346	0.120927	620	0.01	0.5	0.116339	0.122716	580	0.01	0.5	0.106983	0.11338	0.12449	162	2	38	22.3519	8.06917	620	0	38	21.3113	8.04179	580	0
NDUFA5_rs4147635	360	272	51	383	246	49	0.363318	390	274	54	353	244	46	0.959202	382	258	51	361	260	49	0.863066	743	0.01	0.5	0.108762	0.114869	518	0.01	0.5	0.119189	0.124273	100	0.01	0.43	0.1216	0.117394	0.218604	743	0	38	21.1629	8.18678	518	0	38	21.1467	7.84828	100	2
NDUFA6_rs1801311	72	298	314	64	307	307	0.713329	72	313	333	64	292	288	0.807535	72	302	317	64	303	304	0.802713	136	0.01	0.48	0.11	0.115739	605	0.01	0.5	0.116678	0.122594	621	0.01	0.5	0.11153	0.115587	0.830657	136	4	38	21.8456	8.30964	605	0	38	21.3256	7.90432	621	0
NDUFA6_rs2284087	139	347	198	140	340	198	0.978691	146	369	203	133	318	193	0.735013	145	348	198	134	339	198	0.871684	279	0.01	0.5	0.114982	0.118248	687	0.01	0.49	0.115255	0.120345	396	0.01	0.5	0.109975	0.116375	0.743114	279	5	37	21.3978	7.78322	687	0	38	20.9083	8.03139	396	0
NDUFA6_rs9607875		13	671		17	661	0.466428		16	702		14	630	1		11	680		19	652	0.140519						30	0.01	0.5	0.134667	0.138632	1332	0.01	0.5	0.113191	0.118241	0.424258						30	2	36	23.6667	7.77411	1332	0
NDUFA7_rs1019757	33	237	414	22	209	447	0.0757911	27	250	441	28	196	420	0.210955	25	230	436	30	216	425	0.69701	55	0.01	0.49	0.147273	0.135489	446	0.01	0.49	0.111771	0.11666	861	0.01	0.5	0.112497	0.118455	0.0834033	55	4	36	24	7.74358	446	0	38	21.1614	7.77873	861	0
NDUFA7_rs2241590	126	315	243	74	323	281	0.000273141	115	336	267	85	302	257	0.291682	98	342	251	102	296	273	0.133922	200	0.01	0.5	0.12925	0.127803	638	0.01	0.49	0.111082	0.116701	524	0.01	0.5	0.110859	0.117307	0.122027	200	4	38	23.07	8.20376	638	0	38	20.9984	7.99362	524	1
NDUFA7_rs2288414	625	58	1	640	36	2	0.0377468	667	49	2	598	45	1	0.966544	637	53	1	628	41	2	0.446788	1265	0.01	0.5	0.114364	0.119402	94	0.01	0.45	0.106915	0.110337	3	0.01	0.05	0.03	0.02	0.226236	1265	0	38	21.1818	8.05716	94	0	37	21.7128	8.4886	3	13
NDUFA7_rs4147651	14	200	470	23	185	470	0.252236	11	202	505	26	183	435	0.0169026	19	206	466	18	179	474	0.427376	37	0.01	0.47	0.108919	0.129095	385	0.01	0.49	0.118338	0.116399	940	0.01	0.5	0.111936	0.119303	0.149297	37	2	32	20.973	7.24372	385	1	38	21.1481	8.23745	940	0
NDUFA8_rs1411445	113	330	241	130	320	228	0.429552	132	354	232	111	296	237	0.219162	115	321	255	128	329	214	0.131303	243	0.01	0.5	0.108189	0.111755	650	0.01	0.5	0.112092	0.120307	469	0.01	0.48	0.118678	0.120034	0.464944	243	4	38	21.2593	7.9857	650	0	38	21.3108	8.06209	469	0
NDUFA8_rs1536958	412	234	38	392	249	37	0.625744	414	256	48	390	227	27	0.113853	421	236	34	383	247	41	0.298608	804	0.01	0.5	0.11607	0.120838	483	0.01	0.49	0.109275	0.115299	75	0.01	0.5	0.116133	0.118115	0.712387	804	0	38	21.2923	8.03404	483	0	38	21.0145	8.21204	75	6
NDUFA8_rs6822	13	163	508	23	165	490	0.214134	22	156	540	14	172	458	0.0731244	15	162	514	21	166	484	0.438737	36	0.01	0.45	0.103056	0.116737	328	0.01	0.5	0.10936	0.116143	998	0.01	0.5	0.115461	0.119672	0.468733	36	4	36	21.3889	8.3812	328	0	38	21.378	7.78203	998	0
NDUFA8_rs950019	172	354	158	172	349	156	0.994635	184	365	169	160	338	145	0.814502	167	366	157	177	337	157	0.542713	344	0.01	0.48	0.111483	0.118636	703	0.01	0.5	0.113257	0.118186	314	0.01	0.5	0.117229	0.120355	0.92055	344	1	38	21.0727	7.79309	703	0	38	21.2233	8.29958	314	4
NDUFA9_rs1009634	0	55	629	1	45	632	0.350353	0	51	667	1	49	594	0.638136	1	59	631	0	41	630	0.0964171	1	0.03	0.03	0.03		100	0.01	0.48	0.123	0.115894	1261	0.01	0.5	0.11299	0.118969	0.261243	1	12	12	12		100	2	37	21.31	8.52056	1261	0
NDUFA9_rs1029767	26	197	461	26	205	447	0.851504	30	202	486	22	200	422	0.422602	26	213	452	26	189	456	0.556897	52	0.01	0.49	0.123462	0.133753	402	0.01	0.48	0.105945	0.108952	908	0.01	0.5	0.11652	0.121869	0.548108	52	3	35	21.7115	8.17297	402	0	38	21.1418	7.97548	908	0
NDUFA9_rs2058204	23	180	481	21	170	486	0.844313	23	178	516	21	172	451	0.729177	20	184	487	24	166	480	0.612056	44	0.01	0.49	0.116364	0.121867	350	0.01	0.5	0.110971	0.116172	967	0.01	0.5	0.114581	0.119623	0.879489	44	3	35	21.25	7.64359	350	0	38	21	8.10886	967	0
NDUFA9_rs2159351	161	327	196	133	352	193	0.166495	161	354	203	133	325	186	0.729768	164	344	183	130	335	206	0.0774105	294	0.01	0.49	0.121531	0.122806	679	0.01	0.5	0.112239	0.115388	389	0.01	0.5	0.110206	0.121305	0.365699	294	1	38	21.0816	8.29821	679	0	38	21.1988	8.06428	389	1
NDUFA9_rs2240760	352	268	64	302	303	73	0.0384146	359	285	74	295	286	63	0.20819	326	294	71	328	277	66	0.821579	654	0.01	0.5	0.122156	0.122876	571	0.01	0.5	0.105797	0.113274	137	0.01	0.49	0.105912	0.118691	0.0481439	654	0	38	21.341	8.15085	571	0	38	20.9825	8.06768	137	2
NDUFA9_rs2267548	54	257	373	40	283	355	0.153086	59	283	376	35	257	352	0.126462	59	276	356	35	264	372	0.0396912	94	0.01	0.48	0.140957	0.135908	540	0.01	0.49	0.112778	0.11568	728	0.01	0.5	0.110797	0.11829	0.147415	94	4	38	21.383	8.8014	540	0	38	21.1259	8.04111	728	0
NDUFA9_rs2267549	136	319	229	137	362	179	0.0121593	149	353	216	124	328	192	0.74091	127	336	228	146	345	180	0.0335626	273	0.01	0.5	0.108755	0.123482	681	0.01	0.5	0.10906	0.115549	408	0.01	0.49	0.124632	0.120229	0.0234265	273	1	38	21.1758	7.99392	681	0	38	21.1366	8.00995	408	0
NDUFA9_rs2267552	262	317	105	253	329	96	0.688683	277	325	116	238	321	85	0.15473	235	335	121	280	311	80	0.0015574	515	0.01	0.5	0.113262	0.122518	646	0.01	0.49	0.111827	0.114046	201	0.01	0.49	0.120597	0.123752	0.553631	515	0	38	21.3534	8.08006	646	0	38	20.9025	7.98981	201	3
NDUFA9_rs714621	143	312	229	116	359	203	0.0220198	151	336	231	108	335	201	0.0741901	146	336	209	113	335	223	0.112791	259	0.01	0.49	0.122857	0.124768	671	0.01	0.5	0.111848	0.116722	432	0.01	0.5	0.110972	0.118066	0.476939	259	3	38	21.2664	8.45889	671	0	38	20.9538	7.9738	432	1
NDUFA9_rs7971891	0	48	636	1	27	650	0.0170732	1	41	676	0	34	610	0.900958	1	43	647	0	32	639	0.284961	1	0.13	0.13	0.13		75	0.01	0.41	0.111467	0.104541	1286	0.01	0.5	0.113779	0.119565	0.79313	1	17	17	17		75	1	38	21.2533	8.33763	1286	0
NDUFAF1_rs1899	42	267	375	44	261	373	0.956774	49	258	411	37	270	337	0.0733324	50	263	378	36	265	370	0.357024	86	0.01	0.49	0.128023	0.127287	528	0.01	0.5	0.112936	0.117976	748	0.01	0.5	0.112527	0.118268	0.387358	86	0	35	20.9651	7.69484	528	0	38	21.1212	8.0617	748	2
NDUFAF1_rs3743038	72	302	309	70	312	296	0.80043	77	314	326	65	300	279	0.591978	78	303	309	64	311	296	0.483539	142	0.01	0.49	0.127183	0.130168	614	0.01	0.5	0.111433	0.116223	605	0.01	0.5	0.112744	0.118494	0.461366	142	0	38	20.8803	7.55827	614	0	38	21.1759	8.21777	605	3
NDUFB10_rs3178292	7	118	559	8	148	521	0.0903972	12	134	572	3	132	508	0.0726692	5	144	541	10	122	539	0.209453	15	0.01	0.43	0.0993333	0.111	266	0.01	0.5	0.103383	0.112842	1080	0.01	0.5	0.116454	0.120199	0.16022	15	9	38	20.9333	9.85224	266	0	38	20.3421	8.40437	1080	0
NDUFB10_rs740580	502	168	14	477	189	12	0.361473	539	166	13	440	191	13	0.0199561	503	173	15	476	184	11	0.49453	979	0.01	0.5	0.113636	0.119852	357	0.01	0.5	0.114678	0.117723	26	0.01	0.33	0.100769	0.0878145	0.711449	979	0	38	21.189	8.11951	357	0	38	21.2689	8.05357	26	7
NDUFB10_rs758335	30	204	450	22	190	466	0.376076	27	212	479	25	182	437	0.868728	29	196	466	23	198	450	0.707706	52	0.01	0.5	0.139808	0.148885	394	0.01	0.49	0.106421	0.116134	916	0.01	0.5	0.115295	0.117766	0.187909	52	6	37	22.5769	8.90549	394	1	38	21.0685	7.88872	916	0
NDUFB10_rs8062353	1	16	667	0	15	663	1	0	17	701	1	14	629	0.715839	0	15	676	1	16	654	0.78627	1	0.31	0.31	0.31		31	0.01	0.36	0.0929032	0.0900442	1330	0.01	0.5	0.114	0.119203	0.323794	1	30	30	30		31	2	36	19.871	8.79675	1330	0
NDUFB1_rs11160043	69	297	318	92	318	268	0.0163826	89	307	322	72	308	264	0.172402	75	305	311	86	310	275	0.257008	161	0.01	0.48	0.0987578	0.10574	615	0.01	0.5	0.113301	0.119596	586	0.01	0.5	0.11814	0.120971	0.248724	161	1	37	20.9503	8.37392	615	0	38	21.2423	8.01311	586	0
NDUFB2_rs2364397	492	176	16	488	179	11	0.643905	505	199	14	475	156	13	0.340192	489	183	19	491	172	8	0.104109	980	0.01	0.5	0.111663	0.117959	355	0.01	0.5	0.119239	0.121403	27	0.01	0.43	0.112963	0.111797	0.471313	980	0	38	21.2214	8.04602	355	0	38	21.1634	8.16263	27	1
NDUFB2_rs2930315	10	89	579	9	103	564	0.560795	10	112	592	9	80	551	0.240538	13	99	573	6	93	570	0.282461	19	0.01	0.26	0.0815789	0.0719771	192	0.01	0.49	0.117552	0.12036	1143	0.01	0.5	0.113027	0.118677	0.572045	19	1	33	20	8.86316	192	4	38	20.526	8.11819	1143	0
NDUFB2_rs4727040	6	92	586	2	85	591	0.339937	4	94	620	4	83	557	0.982596	6	92	593	2	85	584	0.404858	8	0.01	0.43	0.1875	0.155173	177	0.01	0.5	0.117627	0.119739	1177	0.01	0.5	0.112566	0.118235	0.215581	8	10	37	23.875	7.98995	177	0	37	21.8757	8.01464	1177	0
NDUFB3_rs11888847	660	24		659	19		0.536011	700	18		619	25		0.163881	673	18		646	25		0.278597	1319	0.01	0.5	0.113503	0.118666	43	0.01	0.45	0.118605	0.121392						0.925221	1319	0	38	21.2017	8.09036	43	4	35	21.3023	7.93286
NDUFB4_rs12762	7	133	544	17	153	508	0.0323452	7	153	558	17	133	494	0.0651377	9	135	547	15	151	505	0.153952	24	0.01	0.47	0.0925	0.129992	286	0.01	0.49	0.109545	0.121639	1052	0.01	0.5	0.115266	0.117684	0.0908867	24	4	35	17.1667	7.7833	286	1	37	20.8601	7.8415	1052	0
NDUFB5_rs2339844	588	93	3	580	92	6	0.654666	623	89	6	545	96	3	0.291105	595	94	2	573	91	7	0.253194	1168	0.01	0.5	0.114332	0.119175	185	0.01	0.5	0.110541	0.117166	9	0.01	0.31	0.0911111	0.0950585	0.914601	1168	0	38	21.0967	8.14711	185	2	38	21.8811	7.74154	9	11
NDUFB5_rs9829395	257	324	103	241	343	94	0.491344	252	370	96	246	297	101	0.121516	265	329	97	233	338	100	0.382895	498	0.01	0.49	0.113173	0.118422	667	0.01	0.5	0.115952	0.121316	197	0.01	0.49	0.107157	0.110565	0.830418	498	2	38	21.7892	7.9065	667	0	38	20.8081	8.16712	197	0
NDUFB5_rs9882051	90	313	281	85	327	266	0.665232	87	355	276	88	285	271	0.157739	87	318	286	88	322	261	0.651458	175	0.01	0.49	0.1108	0.113646	640	0.01	0.5	0.114	0.120293	547	0.01	0.49	0.114186	0.118632	0.870889	175	0	38	20.6857	8.2906	640	0	38	20.9328	8.11229	547	2
NDUFB5_rs9883607	150	335	199	145	360	173	0.250507	152	371	195	143	324	177	0.859906	138	356	197	157	339	175	0.267194	295	0.01	0.5	0.110102	0.114004	695	0.01	0.5	0.113237	0.118859	372	0.01	0.49	0.117285	0.122258	0.737244	295	0	38	21.4373	7.92923	695	0	38	20.7914	8.19404	372	2
NDUFB6_rs628425	395	254	35	404	242	32	0.771919	418	265	35	381	231	32	0.933998	405	245	41	394	251	26	0.192486	799	0.01	0.5	0.115582	0.118422	496	0.01	0.49	0.108105	0.117865	67	0.01	0.49	0.13194	0.127413	0.135885	799	0	38	20.9725	8.25589	496	0	38	21.4194	7.7168	67	4
NDUFB6_rs671018	101	349	234	115	308	255	0.114114	112	354	252	104	303	237	0.704511	123	315	253	93	342	236	0.0614668	216	0.01	0.48	0.102454	0.106675	657	0.01	0.5	0.120868	0.12381	489	0.01	0.49	0.108937	0.11634	0.0933391	216	0	37	20.8241	8.31175	657	0	38	21.1446	8.0922	489	3
NDUFB8_rs4919468	36	223	425	26	233	419	0.400258	32	231	455	30	225	389	0.522697	32	225	434	30	231	410	0.757371	62	0.01	0.41	0.124032	0.119115	456	0.01	0.5	0.114803	0.120274	844	0.01	0.5	0.112287	0.117926	0.665448	62	0	35	21.7097	7.72772	456	0	38	21.5899	8.0113	844	0
NDUFB9_rs3829038	2	63	619	3	69	606	0.719748	1	68	649	4	64	576	0.337481	4	69	618	1	63	607	0.473973	5	0.03	0.42	0.17	0.179304	132	0.01	0.49	0.12447	0.121072	1225	0.01	0.5	0.112269	0.118187	0.466431	5	13	35	24	8	132	0	38	21.4015	8.6729	1225	0
NDUFB9_rs4269525	138	337	203	150	310	205	0.473109	141	352	216	147	295	192	0.303165	148	328	206	140	319	202	0.971041	288	0.01	0.5	0.119514	0.122783	647	0.01	0.5	0.117434	0.120548	408	0.01	0.49	0.105025	0.114061	0.135846	288	0	38	21.3264	7.98896	647	1	38	21.1932	8.15512	408	0
NDUFC1_rs3816413	44	262	378	39	225	414	0.095019	42	257	419	41	230	373	0.924203	51	239	401	32	248	391	0.111779	83	0.01	0.47	0.107229	0.115022	487	0.01	0.5	0.117598	0.11919	792	0.01	0.5	0.111919	0.118871	0.42495	83	5	35	20.9518	7.77096	487	3	38	21.5339	7.93533	792	0
NDUFC2_rs2282639	210	338	136	201	348	128	0.761983	222	352	143	189	334	121	0.594144	217	356	118	194	330	146	0.084991	411	0.01	0.49	0.115985	0.121568	686	0.01	0.5	0.109446	0.116015	264	0.01	0.5	0.121326	0.121205	0.292781	411	0	38	21.18	8.18158	686	0	38	21.0991	7.94922	264	0
NDUFC2_rs588584	403	244	37	406	235	37	0.92834	420	261	37	389	218	37	0.593436	393	262	36	416	217	38	0.0989725	809	0.01	0.5	0.11712	0.121726	479	0.01	0.49	0.110313	0.115119	74	0.01	0.44	0.0975676	0.107165	0.35838	809	0	38	21.6032	8.1022	479	1	38	20.62	7.88819	74	0
NDUFC2_rs637124	501	164	19	484	179	15	0.484488	520	180	18	465	163	16	0.993107	495	180	16	490	163	18	0.703886	985	0.01	0.5	0.11531	0.120117	343	0.01	0.5	0.104577	0.109943	34	0.01	0.49	0.157647	0.150938	0.189842	985	0	38	21.1462	8.11797	343	0	38	21.4898	7.90841	34	4
NDUFC2_rs655445	23	175	486	20	176	482	0.918071	27	178	513	16	173	455	0.309178	18	190	483	25	161	485	0.201593	43	0.03	0.47	0.166744	0.157793	351	0.01	0.49	0.11151	0.116176	968	0.01	0.5	0.112087	0.11721	0.109278	43	8	38	23.907	8.04989	351	3	38	21.2963	7.85824	968	0
NDUFS1_rs4147712	235	312	137	213	333	132	0.4024	222	356	140	226	289	129	0.181054	250	317	124	198	328	145	0.0227541	448	0.01	0.48	0.111429	0.117512	645	0.01	0.5	0.11662	0.121117	269	0.01	0.5	0.110297	0.115076	0.931901	448	0	38	21.6562	7.89544	645	0	38	20.986	8.24403	269	3
NDUFS1_rs4147719	345	275	64	329	274	75	0.549712	347	295	76	327	254	63	0.657217	362	261	68	312	288	71	0.0894246	674	0.01	0.48	0.116365	0.121545	549	0.01	0.5	0.110583	0.114801	139	0.01	0.5	0.112734	0.120529	0.50911	674	0	38	21.5104	7.97772	549	0	38	20.8707	8.33117	139	3
NDUFS1_rs6435326	155	342	187	162	333	183	0.86732	169	364	185	148	311	185	0.46318	138	346	207	179	329	163	0.00476012	317	0.01	0.5	0.110473	0.116706	675	0.01	0.49	0.1188	0.121679	370	0.01	0.48	0.107027	0.114754	0.324328	317	0	38	20.9937	8.06108	675	0	38	21.2222	8.17344	370	1
NDUFS2_rs10908826	14	165	505	9	161	508	0.593051	12	173	533	11	153	480	0.983187	15	173	503	8	153	510	0.219886	23	0.01	0.5	0.165217	0.157649	326	0.01	0.5	0.123681	0.126091	1013	0.01	0.49	0.109269	0.114865	0.0477665	23	7	36	23.1739	7.44466	326	0	38	21.8558	8.06173	1013	0
NDUFS2_rs4656993	127	336	221	127	327	224	0.944712	135	345	238	119	318	207	0.884883	131	323	237	123	340	208	0.32105	254	0.01	0.48	0.110591	0.117652	663	0.01	0.5	0.1146	0.119086	445	0.01	0.5	0.114022	0.118991	0.973661	254	1	38	20.4803	8.40887	663	0	38	21.3982	7.99536	445	0
NDUFS3_rs2280231	53	263	368	39	302	337	0.0459616	50	294	374	42	271	331	0.893492	49	289	353	43	276	352	0.814573	92	0.01	0.49	0.14913	0.141574	565	0.01	0.5	0.110832	0.113813	705	0.01	0.5	0.111305	0.11874	0.0528774	92	0	38	20.8261	9.14067	565	1	38	21.1186	8.10821	705	0
NDUFS4_rs1994648	407	248	29	436	219	23	0.179485	440	249	29	403	218	23	0.846998	425	241	25	418	226	27	0.851853	843	0.01	0.5	0.109229	0.116192	467	0.01	0.48	0.11773	0.120393	52	0.01	0.47	0.149038	0.137801	0.0645778	843	0	38	21.0629	7.84966	467	1	38	21.182	8.45457	52	7
NDUFS4_rs2124949	561	117	6	524	147	7	0.0852718	559	151	8	526	113	5	0.202296	539	145	7	546	119	6	0.28495	1085	0.01	0.5	0.116313	0.120268	264	0.01	0.45	0.101402	0.110553	13	0.01	0.39	0.141538	0.137952	0.145041	1085	0	38	21.2138	8.03936	264	0	38	21.3068	8.28947	13	7
NDUFS4_rs2279516	118	350	216	109	325	244	0.233594	113	376	229	114	299	231	0.0913263	109	337	245	118	338	215	0.366517	227	0.01	0.49	0.110705	0.111544	675	0.01	0.5	0.116711	0.123574	460	0.01	0.47	0.110652	0.114931	0.889423	227	1	38	21	7.68345	675	0	38	21.4533	8.10258	460	1
NDUFS4_rs2290697	176	331	177	159	338	181	0.620875	192	342	184	143	327	174	0.151489	180	344	167	155	325	191	0.1543	335	0.01	0.48	0.12194	0.120707	669	0.01	0.49	0.109671	0.119314	358	0.01	0.5	0.11338	0.115591	0.147834	335	0	38	21.6657	8.2941	669	0	38	20.9238	8.21794	358	0
NDUFS4_rs256085	98	305	281	85	318	275	0.541927	92	334	292	91	289	264	0.720358	81	308	302	102	315	254	0.0425061	183	0.01	0.45	0.112951	0.11692	623	0.01	0.5	0.109759	0.117788	556	0.01	0.48	0.118273	0.120364	0.444972	183	0	36	21.4645	7.7628	623	0	38	21.0321	7.9098	556	0
NDUFS4_rs2636993	42	263	379	52	283	343	0.171059	49	263	406	45	283	316	0.0174076	52	273	366	42	273	356	0.63247	94	0.01	0.44	0.10734	0.112203	546	0.01	0.5	0.109341	0.11785	722	0.01	0.49	0.117756	0.120179	0.358395	94	4	35	20.7979	6.95853	546	0	38	20.8608	8.30534	722	0
NDUFS4_rs31304	1	58	625	0	40	638	0.066706	0	56	662	1	42	601	0.344706	0	45	646	1	53	617	0.319896	1	0.05	0.05	0.05		98	0.01	0.49	0.126735	0.125261	1263	0.01	0.5	0.1127	0.118213	0.307167	1	26	26	26		98	4	36	21.8367	7.5337	1263	0
NDUFS4_rs31308	516	155	13	482	181	15	0.195541	543	162	13	455	174	15	0.11255	500	175	16	498	161	12	0.647993	998	0.01	0.49	0.114208	0.119144	336	0.01	0.5	0.112054	0.118605	28	0.01	0.44	0.113571	0.107711	0.763663	998	0	38	21.3627	8.05676	336	3	38	20.6339	8.27223	28	12
NDUFS4_rs370594	389	255	40	399	246	33	0.629694	405	280	33	383	221	40	0.121427	421	241	29	367	260	44	0.0269989	788	0.01	0.49	0.113338	0.118473	501	0.01	0.5	0.113393	0.119738	73	0.01	0.44	0.119041	0.115628	0.795781	788	0	38	21.0203	8.28155	501	0	38	21.505	7.75413	73	1
NDUFS4_rs7711180	630	54	0	631	46	1	0.467722	670	48	0	591	52	1	0.322697	632	58	1	629	42	0	0.145955	1261	0.01	0.5	0.112292	0.117748	100	0.01	0.5	0.1318	0.129805	1	0.03	0.03	0.03		0.157991	1261	0	38	21.2006	8.13362	100	6	35	21.18	7.45001	1	29
NDUFS5_rs3768324	56	291	337	68	255	355	0.137738	67	300	351	57	246	341	0.319351	56	277	358	68	269	334	0.399264	124	0.01	0.5	0.114919	0.124264	546	0.01	0.5	0.113718	0.117783	692	0.01	0.49	0.113396	0.118598	0.988539	124	4	37	22.7903	7.3543	546	0	38	20.6978	8.17774	692	0
NDUFS5_rs6663155	493	177	14	496	165	17	0.722775	521	181	16	468	161	15	0.992858	499	175	17	490	167	14	0.8785	989	0.01	0.5	0.116491	0.121088	342	0.01	0.48	0.106287	0.111463	31	0.01	0.43	0.104839	0.119412	0.388114	989	0	38	20.9949	8.09227	342	1	38	21.7193	7.99799	31	6
NDUFS7_rs2074896		29	655		30	648	0.894746		28	690		31	613	0.426377		24	667		35	636	0.142585						59	0.01	0.45	0.107627	0.117081	1303	0.01	0.5	0.113937	0.118821	0.491983						59	5	38	22.4915	8.40438	1303	0
NDUFS7_rs2074897	147	345	192	157	325	196	0.62681	165	348	205	139	322	183	0.798593	162	340	189	142	330	199	0.492951	304	0.01	0.5	0.116414	0.12089	670	0.01	0.49	0.110478	0.116183	388	0.01	0.5	0.11701	0.121442	0.416373	304	0	38	21.2336	7.7877	670	0	38	21.0985	8.21202	388	3
NDUFS8_rs2286164	390	261	33	394	246	38	0.678634	422	263	33	362	244	38	0.439054	386	267	38	398	240	33	0.426813	784	0.01	0.5	0.113253	0.118749	507	0.01	0.5	0.115464	0.120997	71	0.01	0.38	0.105352	0.101669	0.930736	784	0	38	21.1939	8.03254	507	0	38	21.4201	8.21374	71	7
NDUFV1_rs4148959	234	320	130	227	332	119	0.67125	250	340	128	211	312	121	0.711871	246	336	109	215	316	140	0.0438965	461	0.01	0.5	0.119761	0.123059	652	0.01	0.5	0.11115	0.116296	249	0.01	0.48	0.108956	0.11678	0.281591	461	0	38	21.2842	7.81022	652	0	38	20.8865	8.20191	249	1
NDUFV2_rs10502390	7	150	526	11	143	524	0.599981	14	157	547	4	136	503	0.0909097	10	157	523	8	136	527	0.470587	18	0.01	0.43	0.108333	0.122535	293	0.01	0.49	0.122253	0.122973	1050	0.01	0.5	0.111181	0.117348	0.291637	18	2	33	19.2778	7.69114	293	1	37	21.372	7.65892	1050	0
NDUFV2_rs2276095	14	192	478	35	207	436	0.00303947	23	200	495	26	199	419	0.28611	24	210	457	25	189	457	0.657109	49	0.01	0.44	0.110408	0.11669	399	0.01	0.49	0.104937	0.108877	914	0.01	0.5	0.117648	0.122777	0.346732	49	1	37	19.7755	7.74668	399	0	38	21.193	7.77868	914	0
NDUFV2_rs906807	14	192	478	35	207	436	0.00303947	23	200	495	26	199	419	0.28611	24	210	457	25	189	457	0.657109	49	0.01	0.44	0.110408	0.11669	399	0.01	0.49	0.104937	0.108877	914	0.01	0.5	0.117648	0.122777	0.346732	49	1	37	19.7755	7.74668	399	0	38	21.193	7.77868	914	0
NDUFV3_rs2839601	471	184	29	491	169	18	0.172682	513	180	25	449	173	22	0.750055	484	180	27	478	173	20	0.633668	962	0.01	0.5	0.111133	0.116366	353	0.01	0.48	0.114986	0.121377	47	0.01	0.47	0.155532	0.139234	0.121873	962	0	38	21.0946	8.12163	353	1	38	21.255	7.87744	47	0
NDUFV3_rs2839604	263	320	96	245	319	110	0.4581	267	341	108	241	298	98	0.957908	247	341	99	261	298	107	0.194086	508	0.01	0.49	0.115394	0.124133	639	0.01	0.5	0.113787	0.117349	206	0.01	0.44	0.107136	0.106529	0.914211	508	0	38	20.9744	8.32556	639	2	38	21.4131	7.94978	206	0
NFKB1_rs1609798	64	294	324	60	297	319	0.927725	70	312	334	54	279	309	0.654332	55	318	316	69	273	327	0.0871518	124	0.01	0.5	0.115	0.123047	591	0.01	0.5	0.111506	0.115647	643	0.01	0.49	0.115692	0.121044	0.976325	124	6	36	21.1371	7.34552	591	0	38	21.2318	8.23173	643	0
NFKB1_rs1609993		99	572		93	570	0.755123		106	598		86	544	0.482699		82	597		110	545	0.0155264						192	0.01	0.48	0.104427	0.111434	1142	0.01	0.5	0.115578	0.120194	0.330226						192	0	38	20.8854	8.22507	1142	0
NFKB1_rs230496	242	349	93	254	343	81	0.566958	253	365	100	243	327	74	0.338185	229	371	91	267	321	83	0.0366667	496	0.01	0.49	0.115645	0.120284	692	0.01	0.5	0.112038	0.117373	174	0.01	0.48	0.114483	0.12008	0.98016	496	1	38	20.8851	8.26535	692	0	38	21.4104	7.99054	174	4
NFKB1_rs230510	137	350	197	131	359	188	0.809681	150	356	212	118	353	173	0.152596	126	368	197	142	341	188	0.385996	268	0.01	0.47	0.112425	0.115511	709	0.01	0.5	0.115303	0.119805	385	0.01	0.5	0.111506	0.119143	0.86959	268	3	38	21.3172	7.91766	709	0	38	20.9831	8.03293	385	1
NFKB1_rs230533	69	312	303	62	296	320	0.542003	78	322	318	53	286	305	0.207797	61	336	294	70	272	329	0.0110941	131	0.01	0.48	0.113664	0.117593	608	0.01	0.5	0.11347	0.119851	623	0.01	0.49	0.113852	0.118014	0.974076	131	4	36	21.1145	7.63458	608	0	38	21.3207	8.06282	623	0
NFKB1_rs230547	6	116	562	4	114	559	0.880025	6	121	591	4	109	530	0.918185	5	101	585	5	129	536	0.0670957	10	0.03	0.31	0.098	0.0919903	230	0.01	0.48	0.110565	0.114301	1121	0.01	0.5	0.114532	0.119879	0.89089	10	13	34	21.5	8.19553	230	0	38	21.0696	8.05952	1121	0
NFKB1_rs4648004	278	324	82	268	328	82	0.914881	287	342	89	259	310	75	0.920305	270	339	82	276	313	82	0.66688	546	0.01	0.5	0.109414	0.11678	652	0.01	0.5	0.1175	0.12039	164	0.01	0.47	0.112561	0.118584	0.490841	546	0	38	21.185	8.28864	652	0	38	21.3052	7.96153	164	3
NFKB1_rs4648018		23	661		26	652	0.664905		18	700		31	613	0.0280948		26	665		23	648	0.772608						49	0.01	0.43	0.107143	0.121724	1313	0.01	0.5	0.113907	0.118638	0.309497						49	3	38	23.7347	7.96287	1313	0
NFKB1_rs4648022	4	100	580	7	102	569	0.632929	8	91	619	3	111	530	0.0276657	4	101	586	7	101	563	0.623225	11	0.03	0.45	0.128182	0.146138	202	0.01	0.5	0.121139	0.124825	1149	0.01	0.5	0.112211	0.117384	0.76342	11	11	35	24.7273	9.74773	202	1	38	21.3465	8.76837	1149	0
NFKB1_rs4648039		37	647		37	641	1		36	682		38	606	0.475567		43	648		31	640	0.231713						74	0.01	0.41	0.0956757	0.0892139	1288	0.01	0.5	0.114697	0.120131	0.824777						74	2	38	21.1892	8.18732	1288	0
NFKB1_rs4648090	14	152	518	17	138	523	0.614328	21	140	557	10	150	484	0.0691903	16	147	528	15	143	513	1	31	0.01	0.49	0.152258	0.161631	290	0.01	0.5	0.115655	0.116784	1041	0.01	0.5	0.11196	0.117686	0.608501	31	4	38	23.3226	10.1041	290	1	38	21.6138	8.32987	1041	0
NFKB1_rs4648097	1	19	664	0	16	662	0.732611	0	17	701	1	18	625	0.606231	1	21	669	0	14	657	0.306057	1	0.07	0.07	0.07		35	0.01	0.48	0.121429	0.129958	1326	0.01	0.5	0.113492	0.118485	0.981457	1	24	24	24		35	9	35	21.1714	8.07496	1326	0
NFKB1_rs4648104	5	61	618	1	51	626	0.159195	4	64	650	2	48	594	0.494302	2	64	625	4	48	619	0.261247	6	0.01	0.44	0.236667	0.178736	112	0.01	0.49	0.110625	0.113561	1244	0.01	0.5	0.113344	0.118642	0.357147	6	8	35	22.8333	10.8704	112	4	38	22.3125	7.97183	1244	0
NFKB1_rs4648110	30	209	445	34	201	443	0.819721	37	200	481	27	210	407	0.138735	28	206	457	36	204	431	0.476184	64	0.01	0.49	0.119375	0.137966	410	0.01	0.5	0.115049	0.117599	888	0.01	0.5	0.112613	0.117855	0.833503	64	4	38	22.7656	9.15951	410	1	38	21.0146	8.24679	888	0
NFKB1_rs4648127	4	77	603	2	91	585	0.385045	2	83	633	4	85	555	0.419951	1	79	611	5	89	577	0.138073	6	0.03	0.49	0.148333	0.177022	168	0.01	0.47	0.104048	0.113535	1188	0.01	0.5	0.114848	0.11913	0.271544	6	10	32	19.6667	8.59457	168	1	38	20.5119	8.15126	1188	0
NFKB1_rs4648136		26	658		47	631	0.0113393		40	678		33	611	0.809756		39	652		34	637	0.718383						73	0.01	0.48	0.119452	0.132381	1289	0.01	0.5	0.113336	0.117938	0.58074						73	3	36	20.0959	8.05565	1289	0
NFKB1_rs4648141	15	193	476	26	191	461	0.207335	22	185	511	19	199	426	0.107493	17	191	483	24	193	454	0.40607	41	0.01	0.49	0.0978049	0.1193	384	0.01	0.5	0.118281	0.123946	937	0.01	0.5	0.112465	0.116514	0.462284	41	4	36	21.6829	9.25321	384	1	38	21.1615	8.46988	937	0
NOS3_rs1799983	87	307	290	64	306	308	0.133934	77	332	309	74	281	289	0.616602	71	313	307	80	300	291	0.623299	151	0.01	0.44	0.117152	0.116381	613	0.01	0.5	0.114339	0.120147	598	0.01	0.5	0.11209	0.117981	0.720533	151	0	38	21.0265	8.87765	613	2	38	21.3622	7.98053	598	0
NOS3_rs1800781	17	171	496	14	185	479	0.569752	17	185	516	14	171	459	0.924487	12	184	495	19	172	480	0.387721	31	0.03	0.37	0.118065	0.112173	356	0.01	0.49	0.121826	0.124946	975	0.01	0.5	0.110544	0.11653	0.471615	31	9	33	20.2581	7.39805	356	1	38	20.8511	7.99456	975	0
NOS3_rs2853795	470	195	19	458	200	20	0.911663	489	215	14	439	180	25	0.086885	469	205	17	459	190	22	0.609923	928	0.01	0.5	0.107845	0.115517	395	0.01	0.49	0.123089	0.121208	39	0.02	0.48	0.156667	0.15239	0.0454244	928	0	38	21.2252	8.16271	395	1	38	21.2127	7.95708	39	6
NOS3_rs2853796	179	358	135	201	331	136	0.312511	179	376	147	201	313	124	0.0520907	197	357	128	183	332	143	0.406114	380	0.01	0.5	0.112711	0.119733	689	0.01	0.5	0.11643	0.122353	271	0.01	0.45	0.10845	0.109669	0.974278	380	1	38	21.1421	7.98222	689	0	38	21.2787	8.07221	271	3
NOS3_rs3730305	5	93	586	3	94	581	0.843126	4	103	611	4	84	556	0.784245	5	101	585	3	86	582	0.512906	8	0.03	0.26	0.0875	0.0810203	187	0.01	0.48	0.121765	0.121224	1167	0.01	0.5	0.112545	0.118529	0.496699	8	9	33	21.75	9.51315	187	1	37	21.0321	8.12662	1167	0
NOS3_rs3918188	72	338	274	97	304	277	0.0645862	77	340	301	92	302	250	0.117482	88	336	267	81	306	284	0.384487	169	0.01	0.5	0.0914201	0.105019	642	0.01	0.5	0.115576	0.122068	551	0.01	0.49	0.118258	0.118152	0.0652134	169	2	38	21.071	7.86915	642	0	38	21.2819	8.21626	551	3
NOS3_rs3918196	1	78	605	4	89	585	0.235371	5	100	613	0	67	577	0.0089272	3	77	611	2	90	579	0.418055	5	0.01	0.13	0.046	0.0477493	167	0.01	0.45	0.0886228	0.0941411	1190	0.01	0.5	0.117462	0.121508	0.0176996	5	10	20	14	3.74166	167	0	37	21.5988	7.83032	1190	0
NPHS1_rs3814995	71	304	308	64	312	302	0.778769	74	308	335	61	308	275	0.199542	72	307	312	63	309	298	0.741134	135	0.01	0.48	0.123111	0.127135	616	0.01	0.5	0.116899	0.123908	610	0.01	0.5	0.108393	0.11122	0.681431	135	3	37	21.5704	8.11259	616	0	38	21.1153	7.95381	610	0
NPHS1_rs392702	1	43	640	1	38	639	0.823501	2	37	679	0	44	600	0.156674	1	35	655	1	46	624	0.313681	2	0.03	0.49	0.26	0.325269	81	0.01	0.48	0.111728	0.124517	1279	0.01	0.5	0.113557	0.117985	0.663589	2	15	32	23.5	12.0208	81	2	36	19.7037	8.57532	1279	0
NPHS1_rs443186	636	47	1	635	42	1	0.830612	675	41	2	596	48	0	0.163196	651	39	1	620	50	1	0.350258	1271	0.01	0.5	0.113659	0.118196	89	0.01	0.48	0.110449	0.120971	2	0.03	0.49	0.26	0.325269	0.725441	1271	0	38	21.3068	8.05162	89	2	36	19.6966	8.39968	2	15
NPHS2_rs3765548	39	239	406	46	248	384	0.518991	42	274	402	43	213	388	0.14499	36	262	393	49	225	397	0.103472	85	0.01	0.47	0.106353	0.100295	487	0.01	0.5	0.112115	0.11917	790	0.01	0.5	0.115405	0.120332	0.969574	85	5	38	21.7176	8.26584	487	0	38	20.9076	8.25629	790	0
NPHS2_rs7532635	343	286	55	357	266	55	0.613231	391	279	48	309	273	62	0.0241316	357	290	44	343	262	66	0.0553045	700	0.01	0.49	0.111829	0.117563	552	0.01	0.5	0.116105	0.120078	110	0.01	0.5	0.113091	0.119952	0.711355	700	1	38	21.0929	8.1389	552	0	38	21.4891	8.16392	110	7
NPPA_rs198358	380	263	40	370	265	43	0.895566	383	298	37	367	230	46	0.0511544	387	265	39	363	263	44	0.697964	750	0.01	0.49	0.112507	0.116253	528	0.01	0.5	0.116818	0.122641	83	0.01	0.5	0.0996386	0.10898	0.734439	750	0	38	21.0413	8.04076	528	1	38	21.3977	8.12152	83	4
NPPA_rs198414	14	173	470	16	180	465	0.857864	12	194	492	18	159	443	0.268623	12	179	482	18	174	453	0.464449	30	0.01	0.38	0.1	0.107543	353	0.01	0.5	0.110793	0.120444	935	0.01	0.5	0.11523	0.119141	0.695898	30	8	33	21.7333	8.28764	353	3	38	21.4901	8.26208	935	0
NPPA_rs5063	3	70	611	0	59	619	0.14184	1	75	642	2	54	588	0.397191	1	70	620	2	59	610	0.554412	3	0.03	0.37	0.206667	0.170392	129	0.01	0.5	0.11969	0.117659	1230	0.01	0.5	0.112805	0.118706	0.339291	3	20	33	24.3333	7.50555	129	1	38	20.1705	7.7026	1230	0
NPPA_rs632793	239	344	101	260	308	110	0.200116	257	352	109	242	300	102	0.668195	259	326	106	240	326	105	0.801842	499	0.01	0.49	0.115311	0.118301	652	0.01	0.5	0.113359	0.120217	211	0.01	0.5	0.110711	0.115437	0.749886	499	0	38	21.3307	8.03937	652	0	38	21.1212	8.03959	211	0
NPY1R_rs1574637	8	117	559	10	118	550	0.880351	9	120	589	9	115	520	0.850748	12	124	555	6	111	554	0.299429	18	0.01	0.29	0.100556	0.0933351	235	0.01	0.5	0.105574	0.113653	1109	0.01	0.5	0.115591	0.120117	0.34853	18	10	35	22.3333	7.59257	235	2	38	21.3234	8.00412	1109	0
NPY1R_rs4057797	103	327	254	119	317	242	0.458511	123	331	264	99	313	232	0.565625	125	318	248	97	326	248	0.189274	222	0.01	0.5	0.10509	0.113746	644	0.01	0.5	0.116025	0.121944	496	0.01	0.48	0.114435	0.116675	0.229345	222	0	38	21.0586	8.37585	644	0	38	21.104	8.02485	496	0
NPY1R_rs9764	367	262	55	333	298	47	0.0999916	364	300	54	336	260	48	0.858684	358	271	62	342	289	40	0.0680892	700	0.01	0.48	0.1152	0.117138	560	0.01	0.5	0.111143	0.120821	102	0.01	0.49	0.116961	0.118654	0.259425	700	0	38	21.4657	7.92834	560	0	38	20.9536	8.25605	102	4
NPY2R_rs2342652	139	343	202	142	346	190	0.82375	144	364	210	137	325	182	0.829956	137	348	206	144	341	186	0.617458	281	0.01	0.5	0.10484	0.113415	689	0.01	0.5	0.11479	0.119748	392	0.01	0.49	0.11801	0.120551	0.383223	281	1	37	20.879	7.66483	689	0	38	21.2656	8.32396	392	0
NPY2R_rs6857715	89	339	256	91	343	243	0.843128	98	357	262	82	325	237	0.878882	103	338	249	77	344	250	0.172011	180	0.01	0.45	0.0986667	0.101367	682	0.01	0.5	0.117214	0.123053	499	0.01	0.5	0.114389	0.118324	0.642613	180	0	38	20.3944	7.72538	682	1	38	21.1891	7.98683	499	0
NPY2R_rs9990860	404	247	33	418	223	37	0.426788	431	249	38	391	221	32	0.943024	418	231	42	404	239	28	0.234963	822	0.01	0.5	0.11	0.116271	470	0.01	0.49	0.118809	0.120974	70	0.01	0.49	0.122143	0.131236	0.572688	822	0	38	20.7579	8.15956	470	4	38	22.0362	7.91754	70	5
NPY_rs16119	167	341	176	168	324	185	0.738326	173	349	195	162	316	166	0.814999	169	341	181	166	324	180	0.934278	335	0.01	0.49	0.119851	0.124978	665	0.01	0.49	0.111714	0.117011	361	0.01	0.5	0.111634	0.116103	0.745854	335	0	37	21.0507	7.92558	665	0	38	21.5835	8.11473	361	1
NPY_rs16148	326	283	74	316	293	69	0.785337	352	295	70	290	281	73	0.289691	319	310	61	323	266	82	0.0449248	642	0.01	0.5	0.110841	0.116504	576	0.01	0.49	0.114201	0.120045	143	0.01	0.48	0.124755	0.123424	0.369833	642	1	38	20.9455	7.89845	576	0	38	21.4045	8.2684	143	3
PARP1_rs1805401	618	66	0	618	56	4	0.0916021	646	70	2	590	52	2	0.51843	629	60	2	607	62	2	0.915914	1236	0.01	0.5	0.113155	0.118262	122	0.01	0.48	0.121393	0.124458	4	0.03	0.05	0.035	0.01	0.387649	1236	0	38	21.0987	8.10847	122	2	36	22.3033	7.85708	4	14
PARP1_rs1805410	477	191	16	481	184	12	0.708728	502	200	16	456	175	12	0.856678	497	178	16	461	197	12	0.281374	958	0.01	0.5	0.111409	0.117926	375	0.01	0.48	0.120133	0.121907	28	0.01	0.33	0.105357	0.103512	0.612142	958	0	38	21.1221	8.09613	375	1	37	21.3493	8.14364	28	9
PARP1_rs1805414	307	304	73	291	315	72	0.742578	305	342	71	293	277	74	0.209731	307	315	69	291	304	76	0.716927	598	0.01	0.49	0.113729	0.118354	619	0.01	0.5	0.115428	0.118712	145	0.01	0.5	0.105862	0.120679	0.491656	598	0	38	21.1906	8.17053	619	1	38	21.2746	7.93678	145	0
PARP1_rs2027440	496	168	20	475	181	22	0.602058	506	190	22	465	159	20	0.751516	505	165	21	466	184	21	0.309398	971	0.01	0.49	0.115613	0.119557	349	0.01	0.5	0.109083	0.115638	42	0.01	0.48	0.106667	0.125711	0.69703	971	0	38	21.2904	8.07517	349	1	38	21.192	7.94162	42	6
PARP1_rs2271347	31	244	409	33	232	413	0.829447	31	256	431	33	220	391	0.696883	33	244	414	31	232	408	0.94984	64	0.01	0.49	0.0954688	0.107982	476	0.01	0.49	0.113592	0.114336	822	0.01	0.5	0.115122	0.121964	0.253191	64	3	36	19.7969	7.72787	476	1	38	21.8256	7.83199	822	0
PARP1_rs3219065	497	167	20	475	181	22	0.557997	506	190	22	466	158	20	0.723567	505	165	21	467	183	21	0.352367	972	0.01	0.49	0.115525	0.119527	348	0.01	0.5	0.10931	0.115726	42	0.01	0.48	0.106667	0.125711	0.718296	972	0	38	21.2891	8.07112	348	1	38	21.1954	7.9528	42	6
PARP1_rs3219066	635	44	2	644	34	0	0.18648	678	38	1	601	40	1	0.743024	645	43	1	634	35	1	0.741998	1279	0.01	0.5	0.113299	0.119256	78	0.01	0.39	0.116667	0.10854	2	0.03	0.13	0.08	0.0707107	0.65772	1279	0	38	21.1853	8.06619	78	1	36	21.3974	8.52093	2	20
PARP1_rs3219110	205	341	138	208	336	134	0.960443	216	367	135	197	310	137	0.435615	204	352	135	209	325	137	0.653694	413	0.01	0.49	0.106586	0.112682	677	0.01	0.5	0.116795	0.120994	272	0.01	0.48	0.116618	0.121829	0.722169	413	0	38	21.1283	7.99275	677	2	38	21.4742	7.99138	272	0
PARP1_rs3219125	587	96	1	584	88	6	0.14938	609	105	4	562	79	3	0.414961	604	82	5	567	102	2	0.102684	1171	0.01	0.5	0.112229	0.117975	184	0.01	0.48	0.12413	0.12441	7	0.03	0.23	0.0785714	0.0728991	0.680366	1171	0	38	21.1102	8.14205	184	2	36	21.8152	7.77263	7	13
PARP1_rs6677172	219	348	117	227	325	126	0.538958	228	367	123	218	306	120	0.408373	223	344	124	223	329	119	0.938766	446	0.01	0.49	0.113722	0.118994	673	0.01	0.49	0.116568	0.118632	243	0.01	0.5	0.105514	0.118521	0.285979	446	2	38	21.2534	7.94367	673	0	38	21.373	8.13222	243	0
PARP1_rs747658	467	198	19	464	199	15	0.820938	484	222	12	447	175	22	0.051914	466	208	17	465	189	17	0.724405	931	0.01	0.5	0.113147	0.117887	397	0.01	0.49	0.114282	0.12098	34	0.01	0.44	0.120588	0.117704	0.608031	931	0	38	21.1074	8.18254	397	3	38	21.262	7.76985	34	0
PARP1_rs8679	408	245	31	410	234	34	0.838483	427	260	31	391	219	34	0.548743	411	246	34	407	233	31	0.903024	818	0.01	0.5	0.115293	0.122106	479	0.01	0.49	0.113278	0.114255	65	0.01	0.49	0.096	0.107221	0.303898	818	0	38	20.9584	8.24269	479	1	38	21.7871	7.80761	65	3
PARP1_rs874583	218	343	122	220	326	132	0.670654	227	367	124	211	302	130	0.232999	211	353	127	227	316	127	0.318191	438	0.01	0.5	0.112329	0.119907	669	0.01	0.49	0.116667	0.118648	254	0.01	0.49	0.107323	0.116625	0.225625	438	0	38	21.105	8.14474	669	0	38	21.2571	8.14702	254	2
PCSK9_rs11583723	18	158	508	12	171	495	0.406379	16	185	517	14	144	486	0.334465	15	167	509	15	162	494	1	30	0.01	0.48	0.113333	0.122146	329	0.01	0.5	0.0983283	0.108597	1003	0.01	0.5	0.118704	0.121435	0.0200424	30	6	35	21.5333	8.39431	329	0	38	20.9119	7.96303	1003	0
PCSK9_rs1165287	281	316	87	256	316	106	0.221425	291	325	102	246	307	91	0.640948	278	308	105	259	324	88	0.319875	537	0.01	0.5	0.123222	0.124174	632	0.01	0.5	0.110348	0.1168	193	0.01	0.49	0.0979275	0.107111	0.151572	537	0	38	21.2346	8.06763	632	1	38	21.4794	8.2333	193	0
PCSK9_rs17111503	346	287	51	347	289	42	0.655085	357	300	61	336	276	32	0.0350533	349	300	42	344	276	51	0.449225	693	0.01	0.49	0.108095	0.115841	576	0.01	0.5	0.117604	0.120384	93	0.01	0.48	0.130753	0.12781	0.115342	693	0	38	21.1039	8.32804	576	0	38	21.2986	7.75457	93	4
PCSK9_rs2479409	265	342	77	283	312	83	0.337143	290	330	98	258	324	62	0.0484234	278	340	73	270	314	87	0.353004	548	0.01	0.49	0.107993	0.115028	654	0.01	0.5	0.11422	0.119292	160	0.01	0.48	0.130812	0.127496	0.16637	548	0	38	21.2226	8.3389	654	1	38	21.3456	7.9099	160	0
PCSK9_rs2479410	82	307	295	84	300	294	0.964149	87	326	305	79	281	284	0.795309	88	316	287	78	291	302	0.424987	166	0.01	0.48	0.0973494	0.1097	607	0.01	0.5	0.110181	0.114535	589	0.01	0.49	0.121851	0.124767	0.0920424	166	0	36	20.6024	8.4257	607	0	38	21.056	8.11124	589	0
PCSK9_rs2483205	128	340	216	147	320	211	0.374917	142	349	227	133	311	200	0.920505	147	334	210	128	326	217	0.53876	275	0.01	0.49	0.112655	0.12003	660	0.01	0.49	0.110909	0.118473	427	0.01	0.5	0.118571	0.11835	0.527184	275	2	38	20.4655	7.80287	660	0	38	21.2136	8.10935	427	1
PCSK9_rs4275490	604	79	1	617	59	2	0.158366	643	74	1	578	64	2	0.787803	626	64	1	595	74	2	0.44652	1221	0.01	0.5	0.112973	0.117762	138	0.01	0.45	0.118551	0.124921	3	0.03	0.44	0.17	0.23388	0.897691	1221	0	38	21.3546	8.10047	138	2	38	19.9565	7.88963	3	13
PCSK9_rs483462	327	283	74	316	293	69	0.775335	338	300	80	305	276	63	0.710058	322	298	71	321	278	72	0.808531	643	0.01	0.5	0.119005	0.12543	576	0.01	0.5	0.110955	0.115326	143	0.01	0.48	0.100559	0.0987441	0.949228	643	0	38	21.3841	7.93236	576	2	38	21.1354	8.28151	143	0
PCSK9_rs494198	300	300	84	270	310	98	0.249232	304	323	91	266	287	91	0.73525	292	304	95	278	306	87	0.815893	570	0.01	0.5	0.122456	0.121944	610	0.01	0.49	0.109033	0.117752	182	0.01	0.49	0.101648	0.11002	0.0972172	570	0	38	21.407	8.1809	610	1	38	21.359	8.1875	182	0
PCSK9_rs499718	29	201	454	18	211	449	0.245268	25	228	465	22	184	438	0.428434	27	205	459	20	207	444	0.600966	47	0.01	0.44	0.110426	0.118026	412	0.01	0.48	0.107209	0.117041	903	0.01	0.5	0.116777	0.119507	0.204296	47	6	38	21.9362	8.06604	412	0	38	20.3811	7.87635	903	0
PCSK9_rs502576	439	206	36	441	200	35	0.959107	471	205	40	409	201	31	0.492703	432	216	41	448	190	30	0.189095	880	0.01	0.5	0.114693	0.120188	406	0.01	0.5	0.116084	0.119778	71	0.01	0.37	0.0890141	0.0916695	0.529972	880	0	38	21.4125	7.95417	406	0	38	21.0172	8.23915	71	4
PCSK9_rs516499	468	192	24	462	185	31	0.603052	495	190	33	435	187	22	0.352558	466	198	27	464	179	28	0.715163	930	0.01	0.5	0.117032	0.122455	377	0.01	0.49	0.108462	0.112049	55	0.01	0.44	0.0923636	0.0945352	0.922785	930	0	38	21.4817	7.96617	377	0	38	20.7347	8.40964	55	4
PCSK9_rs572512	101	315	268	91	315	272	0.765765	94	337	287	98	293	253	0.528589	93	326	272	99	304	268	0.714116	192	0.01	0.5	0.12875	0.124793	630	0.01	0.48	0.111937	0.118917	540	0.01	0.49	0.110315	0.116047	0.141025	192	0	38	21.2604	7.98788	630	0	38	21.2492	8.04734	540	0
PCSK9_rs7552841	90	331	263	95	300	283	0.310381	103	316	299	82	315	247	0.191303	100	313	278	85	318	268	0.568702	185	0.01	0.43	0.114	0.116531	631	0.01	0.5	0.121173	0.125473	546	0.01	0.49	0.104872	0.110751	0.216186	185	0	36	21.0541	8.10041	631	1	38	21.4247	8.27697	546	0
PDGFB_rs130653	40	273	371	39	248	391	0.427749	41	265	412	38	256	350	0.521791	34	275	382	45	246	380	0.237694	79	0.01	0.48	0.117089	0.119015	521	0.01	0.49	0.116564	0.120566	762	0.01	0.5	0.111325	0.1175	0.409185	79	3	38	21.7468	8.43599	521	3	38	21.4299	7.79271	762	0
PDGFB_rs130654	346	286	52	362	266	50	0.577294	377	286	55	331	266	47	0.861695	357	289	45	351	263	57	0.304542	708	0.01	0.5	0.113277	0.118442	552	0.01	0.49	0.114529	0.119475	102	0.01	0.48	0.111667	0.117542	0.860412	708	0	38	21.2218	8.13797	552	0	38	21.1975	7.96447	102	3
PDGFB_rs2040399	318	297	69	313	292	73	0.925453	336	293	89	295	296	53	0.0201319	320	286	85	311	303	57	0.0528026	631	0.01	0.5	0.116117	0.118551	589	0.01	0.49	0.112156	0.119847	142	0.01	0.5	0.109014	0.115214	0.31186	631	1	38	21.4691	7.95814	589	0	38	20.8217	8.17873	142	2
PDGFB_rs2247128	73	310	301	65	303	310	0.714723	67	315	336	71	298	275	0.26219	71	314	306	67	299	305	0.909785	138	0.01	0.48	0.118551	0.114774	613	0.01	0.49	0.118483	0.124743	611	0.01	0.5	0.107725	0.11317	0.21831	138	0	38	21.7464	8.13128	613	0	38	21.4437	7.92276	611	0
PDGFB_rs4821875	107	353	224	112	335	231	0.717812	124	349	245	95	339	210	0.26433	107	347	237	112	341	218	0.713737	219	0.01	0.48	0.110457	0.115587	688	0.01	0.49	0.117689	0.119382	455	0.01	0.5	0.109121	0.119221	0.196606	219	1	38	20.9589	8.06187	688	0	38	21.2645	7.96498	455	0
PDGFB_rs4990919	76	313	295	85	299	294	0.67023	95	310	313	66	302	276	0.163522	96	303	292	65	309	297	0.0564165	161	0.01	0.5	0.116646	0.127299	612	0.01	0.49	0.115163	0.118836	589	0.01	0.5	0.11129	0.116294	0.807772	161	0	38	21.4783	8.19	612	4	38	21.2908	8.08974	589	0
POMC_rs1866146	289	313	82	300	298	80	0.760863	314	315	89	275	296	73	0.690911	306	309	76	283	302	86	0.519719	589	0.01	0.49	0.111766	0.114891	611	0.01	0.5	0.113944	0.12053	162	0.01	0.5	0.119506	0.125816	0.960412	589	1	38	21.1715	8.14596	611	0	38	21.3257	7.83709	162	0
POMC_rs3769671	650	34		635	43		0.292387	674	44		611	33		0.481182	652	39		633	38		1	1285	0.01	0.5	0.114568	0.119205	77	0.01	0.44	0.0985714	0.109757						0.181056	1285	0	38	21.2202	8.06625	77	1	37	20.9481	8.40097
POMC_rs6713532	394	264	26	397	245	36	0.324356	432	256	30	359	253	32	0.244789	391	273	27	400	236	35	0.172352	791	0.01	0.49	0.11268	0.117526	509	0.01	0.5	0.115422	0.119805	62	0.01	0.44	0.111774	0.126355	0.880694	791	0	38	21.3198	7.92226	509	0	38	20.9587	8.34706	62	4
POMC_rs6719226		74	610		56	622	0.117183		68	650		62	582	0.926703		65	626		65	606	0.926558						130	0.01	0.49	0.123	0.126972	1232	0.01	0.5	0.112679	0.117817	0.37285						130	1	38	21.3692	8.16415	1232	0
POMC_rs934778	318	300	66	321	299	58	0.780082	337	313	68	302	286	56	0.875438	329	298	64	310	301	60	0.812527	639	0.01	0.5	0.116776	0.122914	599	0.01	0.48	0.107229	0.112894	124	0.01	0.49	0.12871	0.122978	0.183606	639	0	38	21.2347	8.06816	599	1	38	21.172	8.07814	124	4
PON1_rs1157745	52	287	345	43	276	359	0.52048	46	301	371	49	262	333	0.653699	47	275	369	48	288	335	0.438118	95	0.01	0.49	0.132211	0.138573	563	0.01	0.5	0.114103	0.120293	704	0.01	0.5	0.11081	0.11442	0.706343	95	0	38	21.3053	8.0346	563	0	38	21.2114	8.00843	704	0
PON1_rs2049649	323	281	80	319	295	64	0.35281	356	294	68	286	282	76	0.115752	318	296	77	324	280	67	0.633552	642	0.01	0.49	0.110685	0.115857	576	0.01	0.5	0.11434	0.119182	144	0.01	0.48	0.124236	0.129169	0.635049	642	2	38	21.0779	8.01929	576	0	38	21.0017	8.12586	144	0
PON1_rs2074351	54	280	350	45	269	364	0.531471	54	289	375	45	260	339	0.937901	48	293	350	51	256	364	0.27787	99	0.01	0.44	0.116162	0.123435	549	0.01	0.49	0.113934	0.12162	714	0.01	0.5	0.113109	0.115914	0.970503	99	8	38	21.798	7.8934	549	0	38	21.1111	8.14672	714	1
PON1_rs2237583	59	263	362	64	259	355	0.879982	64	270	384	59	252	333	0.806683	56	287	348	67	235	369	0.039316	123	0.01	0.48	0.114472	0.123827	522	0.01	0.5	0.110172	0.11439	717	0.01	0.5	0.116067	0.120989	0.824328	123	8	38	22.6179	8.39157	522	0	38	21.0498	8.18579	717	0
PON1_rs2272365	497	175	12	498	162	18	0.431342	535	169	14	460	168	16	0.405511	481	194	16	514	143	14	0.0126792	995	0.01	0.5	0.114241	0.118624	337	0.01	0.48	0.111454	0.117721	30	0.01	0.44	0.119333	0.135569	0.818492	995	1	38	21.1447	8.08127	337	0	38	21.3591	8.07066	30	8
PON1_rs2299255	518	147	18	529	141	8	0.133309	542	156	20	505	132	6	0.0335545	545	134	11	502	154	15	0.179473	1047	0.01	0.5	0.113028	0.11742	288	0.01	0.49	0.115799	0.12311	26	0.01	0.44	0.107692	0.120476	0.946126	1047	0	38	21.2388	8.13441	288	2	37	20.9653	7.78672	26	10
PON1_rs2299260	453	207	24	443	210	25	0.941635	473	220	25	423	197	24	0.978321	465	207	19	431	210	30	0.173757	896	0.01	0.5	0.115134	0.120666	417	0.01	0.48	0.111103	0.114848	49	0.01	0.48	0.108571	0.116833	0.68814	896	0	38	21.279	7.98702	417	1	38	20.9305	8.30185	49	6
PON1_rs3917528	561	118	5	557	116	5	1	598	115	5	520	119	5	0.46061	558	127	6	560	107	4	0.397206	1118	0.01	0.5	0.113184	0.117472	234	0.01	0.45	0.112991	0.122052	10	0.03	0.44	0.183	0.165331	0.230011	1118	0	38	21.1458	8.07514	234	0	38	21.4402	8.14716	10	12
PON1_rs3917532	345	287	52	359	276	43	0.52048	371	301	46	333	262	49	0.653699	369	275	47	335	288	48	0.438118	704	0.01	0.5	0.11081	0.11442	563	0.01	0.5	0.114103	0.120293	95	0.01	0.49	0.132211	0.138573	0.706343	704	0	38	21.1861	8.15904	563	0	38	21.2114	8.00843	95	0
PON1_rs757158	137	327	220	124	336	218	0.683935	143	332	243	118	331	195	0.160723	126	331	234	135	332	204	0.356105	261	0.01	0.49	0.123103	0.125936	663	0.01	0.5	0.111327	0.118713	438	0.01	0.45	0.111575	0.114186	0.560155	261	1	38	21.023	8.69524	663	0	38	21.356	7.97712	438	0
PON1_rs854555	75	329	280	77	305	296	0.505142	81	322	315	71	312	261	0.395247	75	318	298	77	316	278	0.812377	152	0.01	0.49	0.121382	0.127279	634	0.01	0.5	0.11194	0.118818	576	0.01	0.5	0.113524	0.116365	0.793286	152	0	38	21.6579	8.4533	634	0	38	21.1151	8.01486	576	0
PON1_rs854563	92	302	290	95	323	260	0.311027	99	334	285	88	291	265	0.858572	98	326	267	89	299	283	0.413213	187	0.01	0.48	0.114545	0.111833	625	0.01	0.5	0.111952	0.119646	550	0.01	0.49	0.115309	0.120089	0.390631	187	2	38	21.3583	7.75186	625	0	38	20.888	8.09778	550	0
PON1_rs854565	65	294	325	67	289	322	0.967337	72	302	344	60	281	303	0.816156	57	298	336	75	285	311	0.182172	132	0.01	0.48	0.110758	0.116754	583	0.01	0.5	0.111732	0.116592	647	0.01	0.5	0.115997	0.121112	0.796685	132	1	38	20.8333	8.67317	583	2	38	21.5918	8.12645	647	0
PON1_rs854567	28	202	454	30	212	436	0.727195	32	220	466	26	194	424	0.894497	21	213	457	37	201	433	0.0794708	58	0.01	0.48	0.102069	0.107765	414	0.01	0.48	0.107754	0.11388	890	0.01	0.5	0.117169	0.121522	0.349288	58	6	38	21.7069	7.97806	414	1	38	20.7367	8.26385	890	0
PON1_rs854568	395	248	41	394	254	30	0.418831	417	264	37	372	238	34	0.991221	417	243	31	372	259	40	0.140863	789	0.01	0.49	0.110355	0.115064	502	0.01	0.5	0.11759	0.123571	71	0.01	0.48	0.122676	0.123889	0.620916	789	0	38	21.5957	7.92574	502	0	38	20.5777	8.16722	71	2
PPARG_rs10510412	38	244	401	31	265	382	0.362898	42	271	405	27	238	378	0.330286	32	279	380	37	230	403	0.0658002	69	0.01	0.47	0.11913	0.122387	509	0.01	0.49	0.112908	0.11513	783	0.01	0.5	0.113729	0.120863	0.883121	69	6	38	21.1884	8.11367	509	0	38	21.334	8.13121	783	0
PPARG_rs10510419	10	163	510	7	175	496	0.575377	9	184	525	8	154	481	0.761981	10	170	511	7	168	495	0.816945	17	0.01	0.47	0.134706	0.133469	338	0.01	0.49	0.118343	0.120586	1006	0.01	0.5	0.111779	0.117917	0.668889	17	9	36	20.9412	8.08139	338	0	38	21.2012	8.05182	1006	0
PPARG_rs1152003	309	308	67	282	326	70	0.411797	321	323	74	270	311	63	0.480855	306	312	73	285	322	64	0.549188	591	0.01	0.5	0.114129	0.121598	634	0.01	0.49	0.110347	0.113428	137	0.01	0.48	0.127007	0.129486	0.520098	591	0	38	21.066	8.12638	634	0	38	21.2539	8.14541	137	2
PPARG_rs11715073	401	244	38	382	265	31	0.362898	405	271	42	378	238	27	0.330286	380	279	32	403	230	37	0.0658002	783	0.01	0.5	0.113729	0.120863	509	0.01	0.49	0.112908	0.11513	69	0.01	0.47	0.11913	0.122387	0.883121	783	0	38	21.1022	8.04255	509	0	38	21.334	8.13121	69	6
PPARG_rs17029008	15	178	490	13	188	477	0.766683	12	185	521	16	181	446	0.317487	12	177	502	16	189	465	0.372473	28	0.01	0.4	0.107857	0.110432	366	0.01	0.49	0.109235	0.111662	967	0.01	0.5	0.115553	0.121609	0.849529	28	10	36	21.3571	6.73418	366	0	38	21.6503	8.2391	967	0
PPARG_rs17036281	571	108	4	561	112	5	0.871909	591	121	6	541	99	3	0.556201	568	119	4	564	101	5	0.509916	1132	0.01	0.5	0.114002	0.119673	220	0.01	0.48	0.109955	0.112284	9	0.03	0.47	0.166667	0.154272	0.625593	1132	0	38	21.2217	8.09413	220	3	38	21.1227	8.03693	9	13
PPARG_rs1797912	276	318	90	257	318	103	0.47178	278	328	112	255	308	81	0.273934	273	316	102	260	320	91	0.716457	533	0.01	0.49	0.122589	0.122375	636	0.01	0.5	0.107484	0.113475	193	0.01	0.5	0.109378	0.124284	0.0995406	533	0	38	21.8837	8.196	636	1	38	20.978	8.00725	193	3
PPARG_rs1801282	528	145	11	522	148	8	0.787919	548	160	10	502	133	9	0.762855	523	156	12	527	137	7	0.34158	1050	0.01	0.5	0.1134	0.119311	293	0.01	0.45	0.11413	0.117119	19	0.01	0.38	0.121053	0.115609	0.84868	1050	0	38	21.119	8.04516	293	0	38	21.3857	8.21322	19	10
PPARG_rs2655259	653	31		648	30		1	683	35		618	26		0.512598	659	32		642	29		0.794946	1301	0.01	0.5	0.113982	0.119388	61	0.01	0.44	0.106885	0.103852						0.820446	1301	0	38	21.2375	8.14237	61	9	34	20.5082	6.69981
PPARG_rs2938392	164	339	180	142	332	204	0.209296	158	351	209	148	320	175	0.721917	155	330	206	151	341	178	0.375156	306	0.01	0.49	0.121503	0.121327	671	0.01	0.5	0.108823	0.113303	384	0.01	0.5	0.11599	0.125686	0.403115	306	0	38	21.7092	8.44949	671	0	38	21.4054	7.97269	384	2
PPARG_rs2959268	99	310	275	119	307	252	0.24535	123	309	286	95	308	241	0.18058	118	310	263	100	307	264	0.546279	218	0.01	0.5	0.109954	0.126365	617	0.01	0.5	0.111248	0.115477	527	0.01	0.49	0.118027	0.119278	0.338028	218	2	36	20.3028	7.91837	617	1	38	21.0746	7.95896	527	0
PPARG_rs2972164	156	344	183	181	331	166	0.233052	175	347	196	162	328	153	0.3342	163	345	183	174	330	166	0.552965	337	0.01	0.5	0.11	0.119079	675	0.01	0.5	0.110563	0.114283	349	0.01	0.49	0.123324	0.126479	0.382976	337	1	37	20.7893	7.76018	675	0	38	21.2948	8.10579	349	2
PPARG_rs3856806	16	163	505	8	154	516	0.21534	10	165	543	14	152	478	0.515657	9	169	513	15	148	508	0.277042	24	0.03	0.38	0.120833	0.111936	317	0.01	0.49	0.113691	0.110897	1021	0.01	0.5	0.113487	0.121284	0.428448	24	9	36	20.2917	7.92618	317	1	38	21.6751	8.34037	1021	0
PPARG_rs4135246		46	638		56	622	0.304019		50	668		52	592	0.471057		57	634		45	626	0.303858						102	0.01	0.47	0.104216	0.111874	1260	0.01	0.5	0.114429	0.119257	0.597235						102	2	37	21.4314	7.30592	1260	0
PPARG_rs4135247	211	344	128	229	343	106	0.247243	247	346	125	193	341	109	0.163042	237	344	110	203	343	124	0.207235	440	0.01	0.49	0.111045	0.118569	687	0.01	0.5	0.113566	0.118765	234	0.01	0.49	0.11906	0.119369	0.45293	440	0	38	20.5705	7.93622	687	1	38	21.5721	8.05884	234	0
PPARG_rs4135255	670	14		654	24		0.101909	693	25		631	13		0.137129	672	19		652	19		1	1324	0.01	0.5	0.114048	0.11886	38	0.01	0.5	0.100263	0.114076						0.415082	1324	0	38	21.2764	8.11095	38	8	38	18.7105	6.64102
PPARG_rs4135268	5	113	566	0	105	573	0.0742299	3	114	601	2	104	538	0.980647	3	109	579	2	109	560	0.944426	5	0.03	0.47	0.214	0.179527	218	0.01	0.5	0.112477	0.118517	1139	0.01	0.5	0.11345	0.118396	0.295281	5	20	33	26.2	5.26308	218	0	38	20.7248	8.34108	1139	0
PPARG_rs4135273	1	50	633	0	35	643	0.104859	1	40	677	0	45	599	0.313032	0	47	644	1	38	632	0.402305	1	0.08	0.08	0.08		85	0.01	0.47	0.143529	0.138329	1276	0.01	0.5	0.111701	0.117124	0.160667	1	19	19	19		85	7	38	22.2353	8.03659	1276	0
PPARG_rs4135275	427	227	30	464	193	21	0.0548618	462	232	24	429	188	27	0.372056	453	213	25	438	207	26	0.973639	891	0.01	0.5	0.111201	0.116455	420	0.01	0.5	0.120571	0.122783	51	0.01	0.47	0.0998039	0.123101	0.154768	891	0	38	21.0337	8.05131	420	0	38	21.6167	8.06023	51	4
PPARG_rs4135284	10	164	510	7	174	497	0.616098	9	183	526	8	155	481	0.824641	10	169	512	7	169	495	0.786462	17	0.01	0.47	0.134706	0.133469	338	0.01	0.49	0.118047	0.120581	1007	0.01	0.5	0.111837	0.117873	0.692059	17	9	36	20.9412	8.08139	338	0	38	21.2633	8.09249	1007	0
PPARG_rs4135294	7	170	507	6	183	488	0.62212	4	187	527	9	166	468	0.306549	11	171	508	2	182	487	0.0317203	13	0.01	0.47	0.157692	0.153142	353	0.01	0.48	0.115921	0.118445	995	0.01	0.5	0.112171	0.118326	0.291352	13	9	30	20.8462	5.82875	353	2	38	21.5042	7.89603	995	0
PPARG_rs4135300	12	131	541	9	120	549	0.638892	11	138	569	10	113	521	0.739647	13	127	551	8	124	539	0.61526	21	0.01	0.47	0.119524	0.141261	251	0.01	0.5	0.125618	0.12898	1090	0.01	0.5	0.110798	0.115693	0.480489	21	0	33	20.9048	9.95944	251	0	38	21.8884	8.0431	1090	0
PPARG_rs796313	177	341	165	209	322	147	0.12101	210	345	163	176	318	149	0.744665	206	328	157	180	335	155	0.470769	386	0.01	0.5	0.114585	0.124542	663	0.01	0.5	0.110136	0.114378	312	0.01	0.49	0.12016	0.120608	0.487022	386	2	38	20.2746	7.86161	663	0	38	21.5068	8.01167	312	0
PRKCB1_rs1008654	2	62	620	0	70	608	0.316924	2	70	646	0	62	582	0.636318	0	74	617	2	58	611	0.140961	2	0.16	0.45	0.305	0.205061	132	0.01	0.41	0.099697	0.108423	1228	0.01	0.5	0.114853	0.119415	0.0757058	2	27	33	30	4.24264	132	2	37	22.053	7.49994	1228	0
PRKCB1_rs1013316	249	323	112	243	322	113	0.978039	258	340	120	234	305	105	0.977989	245	322	124	247	323	101	0.358875	492	0.01	0.5	0.112785	0.120647	645	0.01	0.49	0.112093	0.117151	225	0.01	0.48	0.120089	0.119205	0.58224	492	2	38	21.3211	8.14723	645	0	38	21.107	7.94738	225	0
PRKCB1_rs1015408	439	217	28	431	223	24	0.802434	469	223	26	401	217	26	0.506968	439	226	26	431	214	26	0.948876	870	0.01	0.5	0.115437	0.119453	440	0.01	0.5	0.109	0.115227	52	0.01	0.45	0.123462	0.135312	0.746613	870	0	38	21.3184	7.98869	440	0	38	20.775	8.14794	52	7
PRKCB1_rs10492795	4	63	617	3	53	622	0.647832	3	65	650	4	51	589	0.693643	5	62	624	2	54	615	0.452837	7	0.03	0.47	0.112857	0.163474	116	0.01	0.5	0.120776	0.122582	1239	0.01	0.5	0.113002	0.11816	0.859909	7	8	28	18.5714	7.43544	116	0	38	21.1552	8.02886	1239	0
PRKCB1_rs10852259	35	255	393	45	253	380	0.487483	41	275	402	39	233	371	0.721236	46	258	387	34	250	386	0.455855	80	0.01	0.45	0.106	0.124021	508	0.01	0.5	0.110984	0.114811	773	0.01	0.5	0.115977	0.120632	0.439622	80	4	38	20.625	7.09497	508	0	38	21.2579	8.1627	773	0
PRKCB1_rs11074601	168	329	187	166	327	185	1	175	360	183	159	296	189	0.21417	161	332	198	173	324	174	0.408938	334	0.01	0.5	0.123174	0.122517	656	0.01	0.49	0.112302	0.116864	372	0.01	0.5	0.107527	0.11828	0.1405	334	0	38	21.2754	8.09157	656	1	38	21.6174	8.04311	372	0
PRKCB1_rs11645314	651	31	2	647	31	0	0.620781	679	39	0	619	23	2	0.0635201	659	30	2	639	32	0	0.543704	1298	0.01	0.5	0.112797	0.11856	62	0.01	0.44	0.132419	0.123098	2	0.08	0.11	0.095	0.0212132	0.164202	1298	0	38	21.1733	8.08227	62	3	36	21.9839	8.21532	2	16
PRKCB1_rs11865731	416	230	38	394	238	46	0.481464	429	244	45	381	224	39	0.95132	416	228	47	394	240	37	0.402493	810	0.01	0.5	0.11737	0.121392	468	0.01	0.49	0.109145	0.115071	84	0.01	0.38	0.103095	0.112174	0.163028	810	0	38	21.379	8.04489	468	0	38	21.0021	8.19084	84	3
PRKCB1_rs120908	81	330	273	91	329	258	0.610909	85	353	280	87	306	251	0.621206	91	344	256	81	315	275	0.327518	172	0.01	0.45	0.105988	0.116487	659	0.01	0.48	0.115432	0.119978	531	0.01	0.5	0.113955	0.117965	0.309976	172	0	37	21.5698	8.05252	659	0	38	21.1108	8.17187	531	2
PRKCB1_rs120909	495	175	14	465	200	12	0.249299	499	202	17	461	173	9	0.363897	489	190	11	471	185	15	0.694226	960	0.01	0.5	0.115042	0.119846	375	0.01	0.48	0.111093	0.117264	26	0.01	0.45	0.103846	0.0989981	0.862574	960	0	38	21.1635	8.08127	375	2	38	21.1627	8.08661	26	5
PRKCB1_rs12445719	510	164	9	505	163	10	0.990976	538	169	11	477	158	8	0.815461	525	159	7	490	168	12	0.298882	1015	0.01	0.5	0.11401	0.118523	327	0.01	0.49	0.111621	0.118788	19	0.01	0.37	0.115789	0.119551	0.972873	1015	0	38	21.1557	8.09311	327	0	37	21.2416	8.02296	19	9
PRKCB1_rs1490754	250	332	102	248	331	99	0.985718	260	351	107	238	312	94	0.963182	253	334	104	245	329	97	0.944048	498	0.01	0.5	0.118394	0.123836	663	0.01	0.5	0.108989	0.112672	201	0.01	0.49	0.117363	0.12501	0.867864	498	0	38	21.2691	8.16085	663	0	38	21.1916	8.09094	201	4
PRKCB1_rs174827	8	104	572	3	82	593	0.0701219	5	98	615	6	88	550	0.914389	6	97	588	5	89	577	0.874407	11	0.03	0.39	0.138182	0.127265	186	0.01	0.42	0.109462	0.113021	1165	0.01	0.5	0.114103	0.11958	0.788983	11	10	35	22.9091	7.51604	186	2	38	20.7688	8.35595	1165	0
PRKCB1_rs174828	144	349	191	156	333	189	0.660252	171	352	195	129	330	185	0.241673	145	356	190	155	326	190	0.508586	300	0.01	0.5	0.111833	0.11987	682	0.01	0.49	0.116921	0.120127	380	0.01	0.48	0.109263	0.115324	0.394104	300	0	38	21.1633	8.33436	682	0	38	21.415	7.94156	380	0
PRKCB1_rs1873423	542	132	10	538	130	10	1	590	119	9	490	143	11	0.020918	551	127	13	529	135	7	0.333473	1080	0.01	0.5	0.11713	0.121271	262	0.01	0.48	0.101679	0.107729	20	0.01	0.38	0.0835	0.105943	0.15245	1080	0	38	21.325	8.05317	262	0	38	20.7672	8.24686	20	10
PRKCB1_rs195990	242	324	118	212	340	125	0.282649	227	361	129	227	303	114	0.350963	225	337	128	229	327	115	0.73771	454	0.01	0.5	0.116696	0.119982	664	0.01	0.48	0.111807	0.118847	243	0.01	0.45	0.113498	0.116359	0.823272	454	2	38	21.0617	8.17743	664	0	38	21.256	8.02715	243	0
PRKCB1_rs196014	28	195	461	17	203	458	0.24887	20	221	477	25	177	442	0.253319	28	191	472	17	207	447	0.157096	45	0.01	0.49	0.13	0.119392	398	0.01	0.5	0.116407	0.123128	919	0.01	0.5	0.111676	0.11676	0.196938	45	0	38	21.5333	8.97876	398	2	38	21.1005	8.00094	919	0
PRKCB1_rs1976194	197	332	155	182	344	152	0.670685	191	364	163	188	312	144	0.550431	173	349	169	206	327	138	0.0398818	379	0.01	0.48	0.123509	0.123413	676	0.01	0.5	0.112367	0.119637	307	0.01	0.49	0.104365	0.109913	0.154832	379	0	38	21.3113	8.21813	676	0	38	21.4379	8.08019	307	0
PRKCB1_rs198145	239	335	110	255	333	90	0.292159	269	350	99	225	318	101	0.480663	253	336	102	241	332	98	0.952087	494	0.01	0.5	0.115223	0.119209	668	0.01	0.49	0.112695	0.117932	200	0.01	0.49	0.11305	0.120619	0.845615	494	1	38	21.2733	8.01471	668	0	38	21.1287	8.05741	200	0
PRKCB1_rs198163	293	314	77	303	302	73	0.791477	326	318	74	270	298	76	0.386366	305	311	75	291	305	75	0.953706	596	0.01	0.5	0.115252	0.119433	616	0.01	0.49	0.112403	0.116919	150	0.01	0.49	0.112533	0.123773	0.772572	596	1	38	21.1527	7.90608	616	0	38	21.2987	8.25991	150	0
PRKCB1_rs198178	185	368	131	202	351	125	0.531994	216	382	120	171	337	136	0.0804623	193	379	119	194	340	137	0.214139	387	0.01	0.5	0.114522	0.116421	719	0.01	0.5	0.11612	0.121868	256	0.01	0.48	0.105469	0.113108	0.644462	387	2	38	21.3101	7.981	719	0	38	21.0779	8.05185	256	2
PRKCB1_rs2023671	403	235	46	367	262	49	0.198071	388	288	42	382	209	53	0.00717389	385	258	48	385	239	47	0.804478	770	0.01	0.5	0.114636	0.120496	497	0.01	0.5	0.111509	0.117241	95	0.01	0.41	0.117053	0.112627	0.84039	770	0	38	21.1416	8.22707	497	2	37	21.2113	7.78113	95	1
PRKCB1_rs2238490	592	84	8	573	98	7	0.507368	617	95	6	548	87	9	0.618362	585	100	6	580	82	9	0.34306	1165	0.01	0.5	0.11382	0.118458	182	0.01	0.45	0.112527	0.119318	15	0.01	0.43	0.115333	0.138609	0.751837	1165	0	38	21.2489	7.99075	182	1	38	20.8297	8.66686	15	7
PRKCB1_rs2239339	16	193	475	13	207	458	0.575308	15	201	502	14	199	431	0.494003	15	204	472	14	196	461	0.985959	29	0.01	0.43	0.110345	0.136316	400	0.01	0.5	0.11255	0.122513	933	0.01	0.5	0.114244	0.116592	0.520657	29	7	38	22.6552	7.99677	400	0	38	20.735	8.15789	933	0
PRKCB1_rs2283540	88	310	286	85	300	293	0.871152	93	322	303	80	288	276	0.947288	94	314	283	79	296	296	0.406357	173	0.01	0.48	0.120347	0.116853	610	0.01	0.49	0.114459	0.119903	579	0.01	0.5	0.110829	0.118108	0.529919	173	1	38	21.4624	8.19352	610	0	38	20.8721	7.94501	579	2
PRKCB1_rs2575390	384	249	51	356	274	48	0.317232	392	272	54	348	251	45	0.878931	377	266	48	363	257	51	0.902852	740	0.01	0.5	0.119514	0.11947	523	0.01	0.49	0.107113	0.118379	99	0.01	0.48	0.104545	0.113419	0.0300188	740	1	38	21.223	8.17255	523	0	38	20.9771	7.92079	99	2
PRKCB1_rs2636957	201	369	114	193	337	148	0.0491527	216	375	127	178	331	135	0.269897	197	364	130	197	342	132	0.813732	394	0.01	0.5	0.116827	0.11831	706	0.01	0.5	0.114065	0.117805	262	0.01	0.48	0.107824	0.121952	0.128875	394	1	38	21.703	7.86791	706	0	38	21.1686	8.04058	262	0
PRKCB1_rs3729896	1	41	642	2	41	635	0.965864	1	48	669	2	34	608	0.460255	2	36	653	1	46	624	0.408486	3	0.03	0.45	0.17	0.242487	82	0.01	0.48	0.126341	0.132716	1277	0.01	0.5	0.112717	0.117482	0.875744	3	7	33	23	14	82	5	38	21.1098	7.83157	1277	0
PRKCB1_rs3729908	14	137	533	12	121	545	0.549292	10	130	578	16	128	500	0.220737	11	140	540	15	118	538	0.343074	26	0.01	0.39	0.11	0.100837	258	0.01	0.42	0.112403	0.115012	1078	0.01	0.5	0.114054	0.120063	0.888462	26	10	35	21.5769	7.12277	258	2	38	21.1512	8.57131	1078	0
PRKCB1_rs3785378	573	108	3	564	104	10	0.149951	613	99	6	524	113	7	0.131495	577	109	5	560	103	8	0.668881	1137	0.01	0.5	0.115251	0.120113	212	0.01	0.48	0.108302	0.112688	13	0.03	0.3	0.0623077	0.0750726	0.371186	1137	0	38	21.2005	8.05025	212	3	38	21.3726	8.25815	13	4
PRKCB1_rs3785380	0	49	635	2	51	625	0.50396	0	46	672	2	54	588	0.102855	2	50	639	0	50	621	0.605418	2	0.03	0.04	0.035	0.00707107	100	0.01	0.48	0.1048	0.118061	1260	0.01	0.5	0.114492	0.118833	0.37902	2	17	18	17.5	0.707107	100	4	37	20.88	7.91914	1260	0
PRKCB1_rs3785383	155	342	187	158	324	196	0.703399	164	356	198	149	310	185	0.847113	150	344	197	163	322	186	0.524077	313	0.01	0.5	0.116837	0.118959	666	0.01	0.49	0.115736	0.117549	383	0.01	0.5	0.107467	0.120588	0.180377	313	0	38	21.0288	8.21481	666	1	38	21.7838	7.83427	383	0
PRKCB1_rs3785396	47	238	399	43	267	368	0.216602	43	273	402	47	232	365	0.530845	53	251	387	37	254	380	0.272771	90	0.01	0.45	0.137	0.124823	505	0.01	0.5	0.104515	0.114006	767	0.01	0.5	0.116949	0.120609	0.0406136	90	1	38	21.7	8.46732	505	1	37	20.8634	7.86008	767	0
PRKCB1_rs403018	294	313	77	300	309	69	0.777067	324	322	72	270	300	74	0.427901	305	313	73	289	309	73	0.917432	594	0.01	0.5	0.115741	0.119354	622	0.01	0.49	0.110643	0.116197	146	0.01	0.49	0.118082	0.126939	0.776659	594	1	38	21.2997	7.93297	622	0	38	21.1158	8.2612	146	0
PRKCB1_rs405322	127	355	202	142	340	196	0.542407	130	374	214	139	321	184	0.274302	136	356	199	133	339	199	0.921641	269	0.01	0.49	0.115093	0.125928	695	0.01	0.5	0.11636	0.118525	398	0.01	0.5	0.10799	0.114026	0.500069	269	0	38	20.7175	8.27208	695	0	38	21.3712	7.9507	398	1
PRKCB1_rs407150	41	241	402	31	228	419	0.360884	35	242	441	37	227	380	0.583005	38	225	428	34	244	393	0.337152	72	0.01	0.49	0.116944	0.123797	469	0.01	0.49	0.110341	0.11519	821	0.01	0.5	0.115274	0.120333	0.7629	72	0	35	21.7083	8.00077	469	0	38	21.2814	7.91256	821	1
PRKCB1_rs411103	256	318	110	251	324	103	0.858837	273	340	105	234	302	108	0.531019	259	338	94	248	304	119	0.0964613	507	0.01	0.49	0.120178	0.120472	642	0.01	0.5	0.109174	0.116318	213	0.01	0.49	0.11169	0.121465	0.430054	507	0	38	21.1755	8.09692	642	0	38	20.9922	8.19354	213	1
PRKCB1_rs4787664	30	248	406	28	228	422	0.558611	35	243	440	23	233	388	0.387071	38	246	407	20	230	421	0.0474307	58	0.01	0.49	0.109483	0.116971	476	0.01	0.5	0.112059	0.116489	828	0.01	0.5	0.114879	0.120211	0.889121	58	0	35	19.6379	7.67474	476	0	38	21.1218	8.15055	828	0
PRKCB1_rs4787676	39	250	395	31	248	399	0.640822	42	255	421	28	243	373	0.380764	44	262	385	26	236	409	0.0409753	70	0.01	0.49	0.123286	0.124606	498	0.01	0.5	0.108735	0.114773	794	0.01	0.5	0.115907	0.120627	0.529017	70	0	35	20.1857	8.16371	498	1	38	21.1667	8.04729	794	0
PRKCB1_rs4788421	0	31	653	3	38	637	0.151054	2	38	678	1	31	612	0.886344	1	38	652	2	31	638	0.595508	3	0.03	0.03	0.03	0	69	0.01	0.47	0.110725	0.122694	1290	0.01	0.5	0.114016	0.11861	0.304055	3	18	24	21	3	69	2	38	20.6812	9.7158	1290	0
PRKCB1_rs7195728	608	72	4	601	74	3	0.923837	636	80	2	573	66	5	0.393425	612	75	4	597	71	3	0.980605	1209	0.01	0.5	0.112473	0.117955	146	0.01	0.45	0.119863	0.120796	7	0.03	0.45	0.19	0.186279	0.269794	1209	0	38	21.1638	8.07383	146	5	38	21.4589	8.04224	7	7
PRKCB1_rs7199551	193	337	154	212	328	138	0.396071	209	358	151	196	307	141	0.721648	207	337	147	198	328	145	0.976467	405	0.01	0.5	0.107235	0.118834	665	0.01	0.5	0.115218	0.117152	292	0.01	0.48	0.119041	0.122046	0.200611	405	0	38	20.5728	7.94989	665	0	38	21.5038	8.13999	292	0
PRKCB1_rs7200798	204	334	146	178	339	161	0.285899	185	381	152	197	292	155	0.0166816	198	341	152	184	332	155	0.833444	382	0.01	0.5	0.117461	0.119928	673	0.01	0.5	0.114027	0.119559	307	0.01	0.49	0.108143	0.115456	0.604398	382	3	38	21.3115	8.16495	673	0	38	20.9703	8.0823	307	1
PRKCB1_rs727797	38	214	432	37	240	401	0.26695	42	238	438	33	216	395	0.857049	39	232	420	36	222	413	0.944455	75	0.01	0.48	0.117733	0.125317	454	0.01	0.49	0.103943	0.115671	833	0.01	0.5	0.118595	0.119555	0.0501379	75	2	38	22.84	8.27899	454	0	38	21.2357	8.05743	833	1
PRKCB1_rs7404793	4	84	596	2	75	601	0.525448	1	89	628	5	70	569	0.151015	5	88	598	1	71	599	0.118317	6	0.02	0.11	0.0566667	0.0355903	159	0.01	0.45	0.115912	0.11688	1197	0.01	0.5	0.113651	0.119204	0.549367	6	14	27	19.5	4.50555	159	0	36	21.0566	7.56595	1197	0
PRKCB1_rs8048821	156	347	181	173	335	170	0.492316	169	378	171	160	304	180	0.105186	165	343	183	164	339	168	0.835414	329	0.01	0.47	0.116201	0.118671	682	0.01	0.5	0.116921	0.122033	351	0.01	0.5	0.104957	0.111905	0.51319	329	1	38	21.3617	8.28824	682	0	38	21.107	7.98541	351	0
PRKCB1_rs8051750	506	164	14	487	171	20	0.461857	516	183	19	477	152	15	0.662651	506	165	20	487	170	14	0.557774	993	0.01	0.5	0.115388	0.120487	335	0.01	0.5	0.106866	0.110654	34	0.01	0.45	0.130294	0.14156	0.700467	993	0	38	21.149	8.12577	335	2	38	21.3254	8.06403	34	7
PRKCB1_rs8055243	66	299	319	59	305	314	0.794075	57	324	337	68	280	296	0.247696	64	301	326	61	303	307	0.841127	125	0.01	0.47	0.11408	0.11338	604	0.01	0.5	0.111026	0.117501	633	0.01	0.5	0.116098	0.120994	0.897818	125	5	38	21.088	8.16169	604	0	38	21.101	8.02286	633	0
PRKCB1_rs8063132	396	250	38	385	258	35	0.829489	409	267	42	372	241	31	0.711737	391	264	36	390	244	37	0.783913	781	0.01	0.5	0.117721	0.121317	508	0.01	0.49	0.109134	0.115689	73	0.01	0.45	0.101781	0.110584	0.519817	781	1	38	21.4097	8.25452	508	0	38	20.8012	7.7583	73	0
PRKCB1_rs9302421	304	295	84	326	288	64	0.168805	326	316	76	304	267	72	0.650233	319	303	69	311	280	79	0.509429	630	0.01	0.5	0.107889	0.117748	583	0.01	0.5	0.11765	0.119255	148	0.01	0.45	0.122703	0.12062	0.074483	630	0	38	20.5937	7.99085	583	1	38	21.9914	8.1089	148	0
PRKCB1_rs9922316	23	192	469	23	201	450	0.768462	29	211	475	17	182	444	0.286987	24	199	464	22	194	455	0.982978	46	0.01	0.45	0.11413	0.123695	393	0.01	0.49	0.111196	0.118254	919	0.01	0.5	0.115049	0.118898	0.839556	46	6	35	22.7826	7.62427	393	0	38	21.1349	8.15536	919	1
PRKCB1_rs9925126	320	292	72	320	290	68	0.952491	339	303	76	301	279	64	0.886523	310	299	82	330	283	58	0.0871791	640	0.01	0.5	0.118813	0.121327	582	0.01	0.5	0.109863	0.117441	140	0.01	0.49	0.105929	0.111439	0.382795	640	0	38	21.4625	8.03446	582	1	38	21.3832	8.00877	140	0
PRKCB1_rs9928102	2	75	607	6	88	584	0.182408	6	80	632	2	83	559	0.304292	4	80	607	4	83	584	0.911411	8	0.01	0.47	0.1325	0.183206	163	0.01	0.48	0.111718	0.123421	1191	0.01	0.5	0.113804	0.117657	0.511664	8	4	32	21	8.43462	163	0	38	20.9755	8.28724	1191	0
PTGS2_rs2745557	17	210	457	19	191	468	0.570282	19	212	487	17	189	438	0.993608	19	185	487	17	216	438	0.0889101	36	0.01	0.48	0.129167	0.126928	401	0.01	0.48	0.116185	0.120659	925	0.01	0.5	0.111968	0.117599	0.462819	36	4	37	23.6944	8.43062	401	3	38	20.9875	8.17419	925	0
PTGS2_rs4648276	515	153	16	505	155	18	0.90506	548	149	21	472	159	13	0.147926	528	147	16	492	161	18	0.417959	1020	0.01	0.5	0.115	0.120664	308	0.01	0.48	0.109188	0.11332	34	0.01	0.43	0.114118	0.109104	0.724034	1020	0	38	21.1784	8.1368	308	3	38	21.4156	8.04321	34	6
PTGS2_rs4648308	15	180	489	20	182	476	0.639634	20	183	515	15	179	450	0.572894	16	175	500	19	187	465	0.448321	35	0.01	0.43	0.111429	0.106195	362	0.01	0.5	0.108646	0.113443	965	0.01	0.5	0.115627	0.1211	0.584992	35	6	35	19.4	7.32522	362	3	38	21.5497	8.01446	965	0
PTGS2_rs5275	297	318	69	287	306	85	0.364726	314	330	74	270	294	80	0.448933	302	309	80	282	315	74	0.719816	584	0.01	0.5	0.111815	0.115617	624	0.01	0.5	0.116138	0.12211	154	0.01	0.49	0.110649	0.116875	0.997311	584	0	38	21.1729	8.23971	624	0	38	21.3141	8.03148	154	4
PTGS2_rs5277	474	192	18	480	178	20	0.722173	504	193	21	450	177	17	0.926409	485	184	22	469	186	16	0.627738	954	0.01	0.5	0.113941	0.119538	370	0.01	0.5	0.112378	0.115741	38	0.01	0.49	0.119211	0.129121	0.95404	954	0	38	21.2191	8.08917	370	2	37	21.2351	8.09706	38	1
PTGS2_rs689462	660	24		646	32		0.277351	685	33		621	23		0.412462	661	30		645	26		0.684494	1306	0.01	0.5	0.11415	0.119003	56	0.01	0.5	0.102321	0.112087						0.506303	1306	0	38	21.1975	8.05798	56	6	36	21.375	8.71271
PTGS2_rs689470		27	657		35	643	0.300459		37	681		25	619	0.298261		33	658		29	642	0.698878						62	0.01	0.5	0.0990323	0.108503	1300	0.01	0.5	0.114362	0.119169	0.380087						62	6	36	21.3871	8.59156	1300	0
PTK2_rs11166990	156	358	170	164	349	165	0.832592	163	380	175	157	327	160	0.692468	163	355	173	157	352	162	0.909986	320	0.01	0.48	0.105188	0.114774	707	0.01	0.5	0.116337	0.119713	335	0.01	0.49	0.116119	0.120249	0.218547	320	1	38	21.2281	7.60101	707	0	38	21.3366	8.17149	335	2
PTK2_rs11785444	14	131	539	9	156	513	0.142785	9	155	554	14	132	498	0.387003	10	142	539	13	145	513	0.695723	23	0.01	0.47	0.110435	0.125824	287	0.01	0.48	0.0963415	0.104598	1052	0.01	0.5	0.11846	0.121799	0.039953	23	8	31	21.6522	6.26396	287	0	38	20.777	7.61158	1052	0
PTK2_rs4596627	21	178	485	19	164	495	0.690424	18	182	518	22	160	462	0.615277	15	180	496	25	162	484	0.19661	40	0.01	0.44	0.1195	0.117756	342	0.01	0.5	0.121082	0.12465	980	0.01	0.5	0.110837	0.116611	0.488427	40	3	35	19.025	8.30041	342	0	38	21.0994	8.49644	980	0
PTK2_rs4961287	75	314	295	75	298	305	0.759737	78	336	304	72	276	296	0.329595	77	312	302	73	300	298	0.96888	150	0.01	0.48	0.11	0.115148	612	0.01	0.5	0.117173	0.119594	600	0.01	0.5	0.111	0.118781	0.392427	150	3	37	21.5733	8.28952	612	0	38	21.1667	8.15189	600	0
PTK2_rs6994744	166	352	166	185	338	155	0.434732	173	380	165	178	310	156	0.182508	182	345	164	169	345	157	0.845617	351	0.01	0.48	0.10567	0.115985	690	0.01	0.5	0.11613	0.119609	321	0.01	0.49	0.117103	0.119685	0.176474	351	1	38	21.4929	7.57321	690	0	38	21.1087	8.19172	321	2
PTK2_rs7011688	667	17		662	16		1	699	19		630	14		0.601106	668	23		661	10		0.0335476	1329	0.01	0.5	0.114176	0.119161	33	0.01	0.39	0.0930303	0.0981862						0.544627	1329	0	38	21.1926	8.08803	33	10	36	21.697	7.96667
PTK2_rs7831543	323	296	65	358	263	57	0.120589	355	297	66	326	262	56	0.895534	343	279	69	338	280	53	0.403189	681	0.01	0.5	0.11301	0.121089	559	0.01	0.49	0.113667	0.116288	122	0.01	0.48	0.117295	0.117178	0.621875	681	0	38	21.2247	7.91003	559	0	38	20.9875	8.25109	122	3
QP_C_rs803223	369	272	43	353	277	48	0.734832	378	294	46	344	255	45	0.841824	368	276	47	354	273	44	0.950549	722	0.01	0.49	0.115388	0.119783	549	0.01	0.5	0.114572	0.120577	91	0.01	0.44	0.0945055	0.0961164	0.57604	722	0	38	21.2313	8.12219	549	3	38	21.2423	8.07524	91	0
REN_rs10900555	302	300	82	296	309	73	0.713854	303	335	80	295	274	75	0.306063	311	296	84	287	313	71	0.3259	598	0.01	0.5	0.111087	0.118967	609	0.01	0.49	0.111642	0.117803	155	0.01	0.5	0.131548	0.120514	0.0231398	598	0	38	21.1304	8.14687	609	0	38	21.2972	8.01676	155	2
REN_rs11571074	584	96	4	563	107	7	0.423366	612	102	4	535	101	7	0.395695	586	99	6	561	104	5	0.804826	1147	0.01	0.5	0.115501	0.119839	203	0.01	0.49	0.105123	0.114271	11	0.03	0.21	0.0872727	0.0710058	0.375855	1147	0	38	21.2833	8.02086	203	0	37	20.8621	8.5249	11	11
REN_rs11571078	11	159	514	12	176	490	0.47381	10	169	539	13	166	465	0.386812	12	164	515	11	171	489	0.752618	23	0.01	0.32	0.0882609	0.0846196	335	0.01	0.5	0.10803	0.114621	1004	0.01	0.5	0.116125	0.12066	0.472027	23	9	33	20.7826	7.4098	335	0	38	21.0567	8.04663	1004	0
REN_rs11571085	3	74	607	2	78	598	0.83153	3	77	638	2	75	567	0.810766	3	78	610	2	74	595	0.978235	5	0.03	0.13	0.082	0.0486826	152	0.01	0.5	0.108553	0.113944	1205	0.01	0.5	0.11444	0.119523	0.944676	5	9	33	21.6	8.84873	152	7	38	21.2105	7.31381	1205	0
REN_rs11571088	591	91	2	575	99	4	0.52953	622	93	3	544	97	3	0.486979	597	89	5	569	101	1	0.144159	1166	0.01	0.5	0.115223	0.12021	190	0.01	0.47	0.104842	0.110232	6	0.03	0.21	0.09	0.0737564	0.723767	1166	0	38	21.2607	8.05798	190	2	37	20.9526	8.30967	6	11
REN_rs11571091	505	166	13	519	150	9	0.433409	548	159	11	476	157	11	0.597116	523	158	10	501	158	12	0.832745	1024	0.01	0.5	0.109658	0.117253	316	0.01	0.48	0.126044	0.1216	22	0.01	0.43	0.122273	0.136414	0.0642204	1024	0	38	21.2373	8.07585	316	0	38	21.2532	8.09267	22	4
REN_rs1464816	86	312	286	92	299	287	0.800269	83	333	302	95	278	271	0.181591	90	309	292	88	302	281	0.988186	178	0.01	0.48	0.11236	0.124846	611	0.01	0.5	0.112995	0.118012	573	0.01	0.5	0.114782	0.1177	0.426226	178	0	38	20.8596	8.25152	611	0	38	21.635	7.99586	573	0
REN_rs2272237	88	326	270	91	308	279	0.708569	94	335	289	85	299	260	0.99703	90	332	269	89	302	280	0.507896	179	0.01	0.49	0.110503	0.119382	634	0.01	0.5	0.11164	0.11819	549	0.01	0.5	0.117031	0.119227	0.494308	179	4	38	21.1061	8.24723	634	0	38	21.1719	8.1555	549	1
REN_rs2887284	33	202	449	34	196	448	0.96703	33	202	483	34	196	414	0.491426	35	194	462	32	204	435	0.643626	67	0.01	0.43	0.106418	0.111501	398	0.01	0.48	0.121206	0.119834	897	0.01	0.5	0.110858	0.118702	0.319484	67	4	37	20.7015	8.20941	398	0	38	20.8442	8.09676	897	0
REN_rs3730103	603	78	3	597	79	2	0.978762	635	80	3	565	77	2	0.892154	608	80	3	592	77	2	1	1200	0.01	0.5	0.114033	0.11931	157	0.01	0.5	0.111847	0.115934	5	0.03	0.13	0.082	0.0486826	0.996818	1200	0	38	21.1758	8.19182	157	7	38	21.414	7.21914	5	9
REN_rs3795574	12	155	517	7	175	496	0.227273	9	167	542	10	163	471	0.563613	14	156	521	5	174	492	0.0543304	19	0.01	0.4	0.101579	0.105318	330	0.01	0.5	0.107545	0.111286	1013	0.01	0.5	0.115884	0.12128	0.800784	19	9	33	21.2632	7.06196	330	2	38	21.0939	7.85586	1013	0
REN_rs4951313	367	261	56	364	267	47	0.65462	400	267	51	331	261	52	0.277069	380	257	54	351	271	49	0.480706	731	0.01	0.5	0.111806	0.120823	528	0.01	0.5	0.115928	0.115288	103	0.01	0.44	0.115243	0.121791	0.560187	731	0	38	21.3475	8.17227	528	0	38	21.0511	8.01394	103	4
REN_rs5705	535	141	8	543	127	8	0.699646	569	142	7	509	126	9	0.805909	551	130	10	527	138	6	0.484221	1078	0.01	0.5	0.109842	0.117693	268	0.01	0.48	0.128396	0.120405	16	0.01	0.43	0.124375	0.144866	0.0260495	1078	0	38	21.1855	8.14988	268	0	38	21.4627	7.84748	16	5
REN_rs5707	399	246	39	397	242	39	0.995752	409	266	43	387	222	35	0.507383	409	243	39	387	245	39	0.858087	796	0.01	0.5	0.114925	0.11986	488	0.01	0.49	0.109221	0.116394	78	0.01	0.5	0.12859	0.121267	0.230303	796	0	38	20.9937	8.06943	488	0	38	21.5287	8.04653	78	2
REN_rs6676670	25	217	442	26	203	449	0.777824	25	235	458	26	185	433	0.26304	23	219	449	28	201	442	0.604171	51	0.01	0.5	0.127451	0.119128	420	0.01	0.48	0.11231	0.117797	891	0.01	0.5	0.113513	0.119199	0.434695	51	2	36	20.549	8.9673	420	0	38	21.6214	7.9273	891	0
RETN_rs1423096	8	116	560	7	122	549	0.869057	9	121	588	6	117	521	0.703345	8	113	570	7	125	539	0.537521	15	0.01	0.44	0.158667	0.154729	238	0.01	0.5	0.122437	0.1252	1109	0.01	0.49	0.111172	0.116639	0.253123	15	14	35	24.5333	6.32305	238	0	38	20.6765	8.32263	1109	0
RETN_rs1862513	329	294	61	341	288	49	0.463221	371	285	62	299	297	48	0.0572669	352	296	43	318	286	67	0.032652	670	0.01	0.5	0.115209	0.121108	582	0.01	0.48	0.111203	0.115774	110	0.01	0.45	0.117273	0.120137	0.750609	670	0	38	21.097	8.05221	582	0	38	21.1426	8.11059	110	6
RETN_rs3745369	166	373	145	164	368	146	0.988943	168	403	147	162	338	144	0.402644	164	389	138	166	352	153	0.311684	330	0.01	0.5	0.113273	0.123227	741	0.01	0.49	0.112294	0.117357	291	0.01	0.5	0.117595	0.11724	0.626928	330	0	38	20.4333	8.41605	741	2	38	21.6343	7.96274	291	0
SDHA_rs6878087	518	149	17	519	147	12	0.676812	549	155	14	488	141	15	0.882336	519	156	16	518	140	13	0.645559	1037	0.01	0.5	0.113944	0.118445	296	0.01	0.49	0.113142	0.121082	29	0.01	0.41	0.108966	0.106816	0.986541	1037	0	38	21.2555	8.04436	296	2	38	21.0709	8.25022	29	6
SDHB_rs1022580	641	41	1	642	36	0	0.639291	670	46	1	613	31	0	0.239915	651	38	1	632	39	0	0.906609	1283	0.01	0.5	0.114279	0.119822	77	0.01	0.41	0.102468	0.0997254	1	0.1	0.1	0.1		0.872159	1283	0	38	21.1208	8.0789	77	6	36	22.3117	8.01193	1	32
SDHB_rs11203280	70	297	317	73	287	318	0.902099	82	312	324	61	272	311	0.360158	80	294	317	63	290	318	0.41912	143	0.01	0.45	0.11028	0.120562	584	0.01	0.49	0.113887	0.118089	635	0.01	0.5	0.11422	0.119039	0.468964	143	3	38	21.3916	7.96297	584	1	38	21.2534	8.07305	635	0
SDHB_rs2076600	42	263	378	41	248	389	0.747257	47	265	405	36	246	362	0.722382	44	266	381	39	245	386	0.655232	83	0.01	0.45	0.102892	0.122649	511	0.01	0.49	0.118806	0.122044	767	0.01	0.5	0.111486	0.116065	0.168205	83	6	38	21.0602	8.09901	511	1	38	21.5577	8.2088	767	0
SDHB_rs2235928	440	216	28	419	235	24	0.447589	448	241	29	411	210	23	0.828337	426	235	30	433	216	22	0.405675	859	0.01	0.5	0.114098	0.117893	451	0.01	0.5	0.114169	0.120681	52	0.01	0.45	0.102115	0.116608	0.818807	859	0	38	21.4552	8.15404	451	1	38	20.6231	7.94284	52	6
SDHB_rs2295059	216	323	145	197	337	144	0.562	206	341	171	207	319	118	0.0395244	204	338	149	209	322	140	0.803013	413	0.01	0.49	0.116392	0.122154	660	0.01	0.5	0.115485	0.118581	289	0.01	0.47	0.105606	0.113977	0.161015	413	0	38	21.2373	8.2669	660	0	38	21.1758	8.00641	289	2
SDHB_rs2647145	471	193	20	465	192	21	0.982028	496	195	27	440	190	14	0.16928	480	191	20	456	194	21	0.838554	936	0.01	0.5	0.114455	0.119241	385	0.01	0.5	0.113792	0.118746	41	0.01	0.42	0.0943902	0.106655	0.509869	936	0	38	21.1955	8.09207	385	0	38	21.0857	8.05485	41	4
SDHB_rs4920653	391	256	37	371	264	43	0.584628	388	280	50	374	240	30	0.114558	379	264	48	383	256	32	0.219498	762	0.01	0.5	0.113556	0.118229	520	0.01	0.5	0.115558	0.120401	80	0.01	0.45	0.102375	0.112882	0.779227	762	0	38	21.4843	8.22278	520	1	38	20.8442	7.82545	80	2
SDHB_rs732679	286	309	89	263	325	90	0.504896	271	337	110	278	297	69	0.018055	273	322	96	276	312	83	0.66744	549	0.01	0.49	0.115118	0.121757	634	0.01	0.5	0.115142	0.118317	179	0.01	0.47	0.103966	0.110542	0.705985	549	0	38	21.3443	8.35022	634	0	38	21.1625	7.85455	179	2
SDHB_rs761420	578	100	6	564	110	4	0.600563	598	114	6	544	96	4	0.79943	585	101	5	557	109	5	0.67902	1142	0.01	0.5	0.114378	0.11989	210	0.01	0.5	0.109952	0.112465	10	0.03	0.35	0.11	0.121198	0.924961	1142	0	38	21.2198	8.14106	210	0	38	21.019	7.77677	10	14
SDHB_rs978528	545	127	12	525	135	18	0.41831	543	153	22	527	109	8	0.00576766	545	130	16	525	132	14	0.893713	1070	0.01	0.5	0.113336	0.118348	262	0.01	0.5	0.113817	0.119083	30	0.01	0.48	0.124	0.131611	0.843769	1070	0	38	21.1645	8.10808	262	0	38	21.4427	7.98097	30	6
SDHC_rs12069801	611	69	4	600	78	0	0.10374	643	72	3	568	75	1	0.422784	611	78	2	600	69	2	0.849983	1211	0.01	0.5	0.113113	0.118562	147	0.01	0.48	0.11449	0.119234	4	0.15	0.35	0.25	0.0820569	0.0562816	1211	0	38	21.0215	8.12655	147	4	38	22.4966	7.60711	4	27
SDHC_rs3935401	613	70	1	592	85	1	0.361474	637	80	1	568	75	1	0.899193	613	78	0	592	77	2	0.530751	1205	0.01	0.5	0.114033	0.119659	155	0.01	0.45	0.111871	0.111825	2	0.03	0.03	0.03	0	0.485533	1205	0	38	21.3037	8.15398	155	3	36	20.3613	7.50315	2	26
SDHC_rs4131826	302	296	86	265	325	88	0.152034	297	332	89	270	289	85	0.845142	297	304	90	270	317	84	0.47551	567	0.01	0.5	0.114832	0.119436	621	0.01	0.5	0.11029	0.117631	174	0.01	0.48	0.121897	0.120382	0.238262	567	0	38	21.6861	8.23314	621	0	38	20.7359	8.0847	174	0
SDHC_rs4634927	309	297	78	328	300	50	0.0349914	324	330	64	313	267	64	0.241576	323	306	62	314	291	66	0.845451	637	0.01	0.5	0.109576	0.114374	597	0.01	0.5	0.118409	0.123975	128	0.01	0.48	0.111875	0.114842	0.865171	637	0	38	21.3469	7.86725	597	0	38	20.9782	8.29861	128	3
SDHD_rs10891319	289	311	84	271	314	93	0.599042	287	338	93	273	287	84	0.616133	272	329	90	288	296	87	0.378288	560	0.01	0.49	0.114304	0.117298	625	0.01	0.5	0.111584	0.119097	177	0.01	0.5	0.118983	0.122233	0.462402	560	0	38	21.5732	8.0387	625	1	38	21.0928	8.01947	177	3
SDHD_rs7127061	668	16		665	13		0.708137	708	10		625	19		0.0591692	676	15		657	14		1	1333	0.01	0.5	0.114209	0.118704	29	0.01	0.41	0.0886207	0.118374						0.0618562	1333	0	38	21.1875	8.08175	29	6	38	22	8.22453
SERPINE1_rs1050813	23	242	419	25	230	423	0.825064	25	250	443	23	222	399	0.989353	25	236	430	23	236	412	0.918055	48	0.01	0.44	0.127083	0.12289	472	0.01	0.48	0.117648	0.117779	842	0.01	0.5	0.110665	0.119015	0.279809	48	5	38	22.7292	8.21452	472	0	38	20.9428	8.06416	842	0
SERPINE1_rs2070682	216	331	137	213	337	128	0.837234	221	356	141	208	312	124	0.832304	225	331	135	204	337	130	0.642967	429	0.01	0.5	0.121538	0.12557	668	0.01	0.49	0.111108	0.115418	265	0.01	0.5	0.107358	0.11521	0.447513	429	0	38	21.4406	8.24022	668	0	38	21.0749	8.03649	265	2
SERPINE1_rs2227631	233	343	107	236	332	110	0.893048	257	350	110	212	325	107	0.500412	254	329	108	215	346	109	0.186568	469	0.01	0.5	0.112473	0.115073	675	0.01	0.49	0.113244	0.118681	217	0.01	0.5	0.117327	0.126989	0.922761	469	1	38	20.8614	7.90569	675	0	38	21.1348	8.22231	217	0
SERPINE1_rs2227667	437	223	24	416	227	35	0.278999	452	233	33	401	217	26	0.804901	438	223	30	415	227	29	0.825576	853	0.01	0.5	0.114689	0.117747	450	0.01	0.49	0.1124	0.120134	59	0.01	0.5	0.108475	0.123453	0.484095	853	0	38	21.2251	7.86363	450	0	38	21.2333	8.3672	59	0
SERPINE1_rs2227692	4	84	596	7	109	562	0.0745435	7	105	606	4	88	552	0.68088	8	88	595	3	105	563	0.123034	11	0.03	0.27	0.108182	0.071947	193	0.01	0.5	0.106788	0.125765	1158	0.01	0.5	0.114862	0.11789	0.102426	11	8	36	23.0909	8.80289	193	0	38	21	8.32791	1158	0
SERPINE1_rs6092	7	142	535	7	139	532	0.988749	6	139	573	8	142	494	0.331835	9	145	537	5	136	530	0.582058	14	0.01	0.49	0.137143	0.132458	281	0.01	0.5	0.114057	0.120516	1067	0.01	0.5	0.113252	0.118134	0.687278	14	0	35	20	9.0893	281	0	38	21.4448	8.53468	1067	0
SERPINF1_rs11062	58	305	321	68	308	302	0.508562	58	322	338	68	291	285	0.239647	62	317	312	64	296	311	0.797349	126	0.01	0.47	0.115238	0.115936	613	0.01	0.49	0.107406	0.113102	623	0.01	0.5	0.119502	0.124397	0.45856	126	2	38	20.2302	7.88737	613	0	38	20.8532	8.08703	623	0
SERPINF1_rs1136287	284	323	76	283	320	75	1	302	349	67	265	294	84	0.0857616	288	323	79	279	320	72	0.89536	567	0.01	0.5	0.118713	0.124938	643	0.01	0.49	0.107527	0.112073	151	0.01	0.48	0.120861	0.122049	0.613544	567	0	38	21.4603	8.01929	643	0	38	21.1975	8.20188	151	2
SERPINF1_rs7224977	59	299	326	61	291	326	0.943059	63	316	339	57	274	313	0.858843	63	290	338	57	300	314	0.585664	120	0.01	0.49	0.104833	0.113626	590	0.01	0.5	0.118966	0.123231	652	0.01	0.5	0.110491	0.115379	0.478348	120	1	36	21.4417	8.48508	590	0	38	21.2627	8.25961	652	0
SLC2A1_rs1770810	34	201	449	28	212	437	0.611919	40	206	472	22	207	414	0.0864068	32	210	449	30	203	437	0.99513	62	0.01	0.48	0.123548	0.130008	413	0.01	0.49	0.109201	0.120877	886	0.01	0.5	0.115169	0.116937	0.260156	62	1	38	22.8387	8.65967	413	0	38	20.724	8.17712	886	0
SLC2A1_rs4660689	108	338	238	97	328	253	0.557537	116	331	271	89	335	220	0.086923	106	329	256	99	337	235	0.621435	205	0.01	0.48	0.117659	0.124701	666	0.01	0.5	0.111817	0.118353	491	0.01	0.5	0.114501	0.116816	0.56816	205	1	38	21.1317	8.43006	666	0	38	21.03	8.2268	491	0
SLC2A1_rs710221	103	335	246	104	320	254	0.796229	111	334	273	96	321	227	0.455716	113	326	252	94	329	248	0.475403	207	0.01	0.48	0.107971	0.123307	655	0.01	0.5	0.119206	0.121465	500	0.01	0.49	0.10876	0.112893	0.143405	207	0	38	20.0531	8.63174	655	0	38	21.5573	7.83503	500	2
SLC2A1_rs751210	72	293	319	53	303	322	0.219956	70	314	334	55	282	307	0.723888	64	296	331	61	300	310	0.778031	125	0.01	0.48	0.11024	0.122425	596	0.01	0.5	0.110772	0.117501	641	0.01	0.5	0.11702	0.119194	0.656025	125	1	38	21.912	8.66492	596	0	38	20.7668	8.06367	641	0
SMAD3_rs10518705	198	329	157	187	350	141	0.405978	198	354	166	187	325	132	0.498654	191	353	147	194	326	151	0.655344	385	0.01	0.5	0.114883	0.120054	679	0.01	0.49	0.11109	0.116468	298	0.01	0.5	0.117953	0.122233	0.586592	385	0	38	20.6779	8.02374	679	0	38	21.2342	8.02961	298	0
SMAD3_rs11637581	56	290	338	40	274	363	0.137953	53	300	365	43	264	336	0.817038	52	293	345	44	271	356	0.4948	96	0.01	0.49	0.119688	0.122324	564	0.01	0.48	0.119379	0.118718	701	0.01	0.5	0.108388	0.118147	0.154951	96	1	38	23.0104	7.87868	564	2	38	21.2979	8.08305	701	0
SMAD3_rs12439792	565	114	4	558	112	8	0.538836	609	101	8	514	125	4	0.0203465	568	114	9	555	112	3	0.263154	1123	0.01	0.5	0.114443	0.118616	226	0.01	0.49	0.109956	0.119727	12	0.03	0.37	0.119167	0.117972	0.761893	1123	0	38	21.122	7.98898	226	0	38	21.677	8.58252	12	8
SMAD3_rs2033785	33	246	405	39	231	408	0.622497	36	258	424	36	219	389	0.710193	40	247	404	32	230	409	0.545077	72	0.01	0.48	0.11	0.125507	477	0.01	0.49	0.11673	0.114307	813	0.01	0.5	0.112189	0.120725	0.0794189	72	6	38	20.5556	9.07231	477	0	38	21.5702	7.59933	813	0
SMAD3_rs2053294	8	137	539	12	156	510	0.246615	8	153	557	12	140	492	0.490005	9	154	528	11	139	521	0.700731	20	0.01	0.47	0.1385	0.160469	293	0.01	0.5	0.106416	0.110945	1049	0.01	0.5	0.115214	0.1199	0.767852	20	11	35	19.35	7.84236	293	0	38	20.7611	8.05105	1049	0
SMAD3_rs2118612	426	230	28	437	210	31	0.552223	466	225	27	397	215	32	0.338534	436	226	29	427	214	30	0.923928	863	0.01	0.49	0.114716	0.119434	440	0.01	0.5	0.113364	0.120252	59	0.01	0.42	0.100508	0.0950757	0.864154	863	0	38	21.1089	8.27372	440	0	38	21.1	7.84206	59	12
SMAD3_rs2118613	173	350	161	182	328	168	0.591778	191	360	167	164	318	162	0.699856	191	325	175	164	353	154	0.119218	355	0.01	0.48	0.111606	0.115897	678	0.01	0.5	0.113805	0.119809	329	0.01	0.47	0.115593	0.119757	0.964861	355	2	38	20.8197	7.93413	678	0	38	21.2198	8.3728	329	2
SMAD3_rs2289263	200	335	149	177	335	166	0.32005	195	361	162	182	309	153	0.698491	193	339	159	184	331	156	0.981753	377	0.01	0.49	0.114164	0.118038	670	0.01	0.5	0.116731	0.122029	315	0.01	0.5	0.10654	0.112249	0.591388	377	2	38	21.8939	8.1596	670	1	38	21.1776	8.01921	315	0
SMAD3_rs2414937	426	235	23	425	225	28	0.707854	459	232	27	392	228	24	0.471963	438	225	28	413	235	23	0.57373	851	0.01	0.49	0.117227	0.121546	460	0.01	0.5	0.105652	0.11096	51	0.01	0.5	0.126471	0.135806	0.405652	851	0	38	21.4195	8.20525	460	0	38	20.787	7.91033	51	6
SMAD3_rs3784681	348	269	64	332	282	63	0.712279	358	300	59	322	251	68	0.269228	335	299	57	345	252	70	0.0800964	680	0.01	0.49	0.112868	0.120515	551	0.01	0.5	0.115064	0.119512	127	0.01	0.43	0.109764	0.104551	0.584052	680	0	38	21.0809	8.26642	551	1	38	21.4247	7.9821	127	5
SMAD3_rs3809572	9	111	564	9	117	552	0.869651	8	122	588	10	106	528	0.763542	9	113	569	9	115	547	0.947191	18	0.01	0.21	0.0705556	0.0546079	228	0.01	0.48	0.116623	0.118947	1116	0.01	0.5	0.113754	0.119347	0.78978	18	7	36	21.1667	9.18599	228	0	38	21.7895	8.16296	1116	0
SMAD3_rs6494629	199	339	146	195	341	142	0.965881	212	363	143	182	317	145	0.498326	200	339	152	194	341	136	0.70665	394	0.01	0.48	0.113173	0.118508	680	0.01	0.5	0.115441	0.11956	288	0.01	0.48	0.110139	0.117292	0.640329	394	0	38	21.1117	8.11982	680	0	38	21.0441	8.08776	288	0
SMAD3_rs6494633	147	354	183	134	340	204	0.366059	149	364	205	132	330	182	0.981213	145	350	196	136	344	191	0.947457	281	0.01	0.5	0.120569	0.12375	694	0.01	0.5	0.112565	0.114586	387	0.01	0.48	0.11062	0.122314	0.313233	281	0	38	21.1174	8.07711	694	0	38	21.2983	7.94763	387	0
SMAD3_rs7162912	90	291	303	85	318	275	0.265996	96	317	305	79	292	273	0.810776	89	305	297	86	304	281	0.906119	175	0.01	0.48	0.108114	0.111409	609	0.01	0.5	0.11399	0.119676	578	0.01	0.5	0.115	0.119976	0.966927	175	0	36	21.8057	8.30295	609	0	38	21.2414	8.13087	578	0
SMAD3_rs7166081	408	234	42	378	255	45	0.345659	410	265	43	376	224	44	0.631923	393	263	35	393	226	52	0.0553009	786	0.01	0.5	0.114046	0.120371	489	0.01	0.5	0.113231	0.118314	87	0.01	0.43	0.112644	0.106438	0.68296	786	0	38	21.0967	8.33767	489	1	38	21.319	7.78795	87	6
SMAD3_rs7167838	5	150	529	10	133	535	0.266287	8	144	566	7	139	498	0.760526	7	136	548	8	147	516	0.55313	15	0.01	0.35	0.0746667	0.0959811	283	0.01	0.5	0.111873	0.118299	1064	0.01	0.5	0.11469	0.119103	0.348331	15	5	37	21.1333	10.1901	283	1	37	21.1201	8.08902	1064	0
SMAD3_rs7181878	144	360	180	158	341	179	0.569767	153	365	200	149	336	159	0.384554	162	346	183	140	355	176	0.461874	302	0.01	0.48	0.111325	0.114693	701	0.01	0.5	0.11592	0.121759	359	0.01	0.48	0.111226	0.116214	0.842234	302	2	38	21.9272	7.80672	701	0	38	21.1341	8.1631	359	0
SMAD3_rs7183244	93	349	242	95	337	246	0.888462	102	358	258	86	328	230	0.877771	85	356	250	103	330	238	0.261089	188	0.01	0.48	0.109043	0.116748	686	0.01	0.5	0.117595	0.119883	488	0.01	0.5	0.109918	0.117857	0.338334	188	1	38	21.1915	8.79144	686	0	38	21.484	8.0138	488	0
SMAD3_rs718663	610	73	1	587	87	4	0.179734	637	78	3	560	82	2	0.571821	609	79	3	588	81	2	0.855107	1197	0.01	0.5	0.114453	0.11804	160	0.01	0.49	0.110062	0.124973	5	0.03	0.08	0.04	0.0223607	0.186486	1197	0	38	21.1228	8.05286	160	0	38	21.8875	8.27665	5	9
SMAD3_rs744910	184	337	163	185	330	163	0.974162	201	351	166	168	316	160	0.64156	192	338	161	177	329	165	0.787938	369	0.01	0.49	0.12065	0.120905	667	0.01	0.5	0.111079	0.115297	326	0.01	0.5	0.111043	0.123064	0.374	369	0	38	21.6016	8.1841	667	0	38	21.3343	7.99122	326	0
SMAD3_rs745103	205	359	120	198	337	143	0.247513	223	361	134	180	335	129	0.441988	204	355	132	199	341	131	0.973072	403	0.01	0.49	0.120124	0.122097	696	0.01	0.5	0.112701	0.116228	263	0.01	0.5	0.106312	0.119897	0.190004	403	3	38	21.7816	7.79699	696	0	38	21.0546	8.30064	263	0
SMAD3_rs746978	207	325	152	165	344	169	0.0463228	192	366	160	180	303	161	0.31387	177	356	158	195	313	163	0.180811	372	0.01	0.49	0.123925	0.125131	669	0.01	0.5	0.108221	0.115348	321	0.01	0.5	0.113115	0.117576	0.333373	372	1	38	21.5161	8.37383	669	0	38	21.2212	7.96542	321	0
SMAD3_rs920293	579	102	3	561	112	5	0.540913	603	113	2	537	101	6	0.323446	581	103	7	559	111	1	0.0821126	1140	0.01	0.5	0.114281	0.119136	214	0.01	0.5	0.111075	0.115491	8	0.01	0.47	0.095	0.154735	0.726919	1140	0	38	21.3158	8.11118	214	0	38	20.715	7.90305	8	11
SMAD3_rs991157	63	310	311	49	291	338	0.178078	61	323	334	51	278	315	0.668981	58	313	320	54	288	329	0.600096	112	0.01	0.49	0.123304	0.122823	601	0.01	0.49	0.117654	0.118832	649	0.01	0.5	0.108305	0.117811	0.146276	112	6	38	22.7946	7.69244	601	0	38	21.1131	8.17764	649	0
SOD1_rs17880135	610	70	4	607	67	4	0.960855	634	77	7	583	60	1	0.0967276	618	67	6	599	70	2	0.394547	1217	0.01	0.5	0.114224	0.119148	137	0.01	0.47	0.104818	0.111534	8	0.01	0.47	0.18	0.159911	0.381917	1217	0	38	21.2071	8.09614	137	5	38	21.3285	8.10148	8	10
SOD1_rs17880196	62	295	327	71	312	295	0.258986	73	320	325	60	287	297	0.867101	66	316	309	67	291	313	0.681277	133	0.01	0.48	0.127293	0.128653	607	0.01	0.5	0.111763	0.117348	622	0.01	0.5	0.112605	0.117832	0.581278	133	2	38	20.6316	8.03447	607	1	38	21.0082	7.85816	622	0
SOD1_rs17880998	9	115	560	9	134	535	0.377374	8	122	588	10	127	507	0.318316	7	131	553	11	118	542	0.509976	18	0.03	0.5	0.162222	0.15832	249	0.01	0.48	0.103574	0.115471	1095	0.01	0.5	0.11516	0.118555	0.119108	18	12	35	22.4444	7.31012	249	0	37	21.4659	7.83292	1095	0
SOD1_rs17884536	1	44	639	0	59	618	0.124295	0	50	668	1	53	589	0.355436	0	49	641	1	54	616	0.505916	1	0.5	0.5	0.5		103	0.01	0.47	0.0892233	0.100574	1257	0.01	0.5	0.115442	0.119455	0.0286945	1	12	12	12		103	6	37	21.1553	7.58709	1257	0
SOD2_rs2842960	185	323	176	170	322	186	0.64689	191	332	195	164	313	167	0.687532	193	317	181	162	328	181	0.274785	355	0.01	0.5	0.112648	0.116492	645	0.01	0.5	0.114977	0.118961	362	0.01	0.49	0.11232	0.120707	0.863447	355	0	38	21.8845	8.15705	645	0	38	20.9163	8.19194	362	2
SOD2_rs5746136	53	268	362	69	288	321	0.0726398	64	308	346	58	248	337	0.249267	54	271	365	68	285	318	0.0860052	122	0.01	0.47	0.107541	0.119152	556	0.01	0.5	0.111043	0.117031	683	0.01	0.5	0.116852	0.120144	0.334683	122	5	38	21.1148	7.63549	556	0	38	21.036	8.08639	683	0
SORD_rs11070439	525	148	11	512	159	7	0.495643	551	160	7	486	147	11	0.473883	524	159	8	513	148	10	0.799985	1037	0.01	0.5	0.114552	0.118979	307	0.01	0.5	0.109446	0.117234	18	0.02	0.43	0.134444	0.131562	0.440664	1037	0	38	21.4484	8.10718	307	0	36	20.2801	7.92075	18	10
SORD_rs172021	513	161	10	494	170	14	0.547078	539	167	12	468	164	12	0.609422	512	170	9	495	161	15	0.424517	1007	0.01	0.49	0.116236	0.119895	331	0.01	0.5	0.106737	0.116716	24	0.02	0.35	0.10125	0.0925162	0.351909	1007	0	38	21.2949	8.08709	331	1	38	20.7674	8.02063	24	7
SORD_rs270821	0	72	612	1	67	610	0.687787	1	75	642	0	64	580	0.888391	0	72	619	1	67	603	0.788178	1	0.01	0.01	0.01		139	0.01	0.5	0.119209	0.12817	1222	0.01	0.5	0.113118	0.117639	0.25379	1	8	8	8		139	4	35	21.3813	7.52618	1222	0
SPP1_rs10516799	65	289	330	66	286	326	0.993349	68	316	334	63	259	322	0.365095	59	313	319	72	262	337	0.0501414	131	0.01	0.48	0.109313	0.121226	575	0.01	0.5	0.118243	0.122118	656	0.01	0.5	0.110518	0.115171	0.590299	131	0	36	21.3206	7.90255	575	0	38	21.2452	8.21535	656	0
SPP1_rs4754	385	253	46	365	256	57	0.429626	392	272	54	358	237	49	0.917404	386	246	59	364	263	44	0.213086	750	0.01	0.5	0.115253	0.120466	509	0.01	0.5	0.114735	0.117412	103	0.01	0.45	0.0967961	0.111814	0.0874859	750	0	38	21.176	8.11407	509	1	38	21.5128	8.07484	103	4
SPP1_rs6813526	334	293	57	346	268	64	0.424856	350	310	58	330	251	63	0.224707	342	289	60	338	272	61	0.880221	680	0.01	0.5	0.107559	0.116008	561	0.01	0.5	0.122299	0.123385	121	0.01	0.41	0.107934	0.109741	0.0513081	680	0	38	20.8926	8.18932	561	0	38	21.7005	8.05757	121	0
SPP1_rs6838095	90	315	279	84	292	302	0.375664	83	329	306	91	278	275	0.31836	78	319	294	96	288	287	0.197014	174	0.01	0.49	0.111207	0.116739	607	0.01	0.5	0.116837	0.117639	581	0.01	0.49	0.111084	0.120521	0.146151	174	0	38	20.9943	7.61387	607	0	38	21.5881	8.20579	581	0
TGFB1_rs10417924	25	215	444	26	220	432	0.894812	22	224	472	29	211	404	0.271956	29	235	427	22	200	449	0.135084	51	0.01	0.45	0.160784	0.149985	435	0.01	0.49	0.118506	0.125376	876	0.01	0.5	0.108516	0.11256	0.0439975	51	5	35	22.1176	7.8247	435	0	38	21.0345	7.86998	876	0
TGFB1_rs1800469	64	309	311	74	275	329	0.204942	80	293	345	58	291	295	0.184263	73	300	318	65	284	322	0.730889	138	0.01	0.49	0.135217	0.139007	584	0.01	0.48	0.110223	0.113678	640	0.01	0.5	0.112156	0.118189	0.274461	138	4	37	22.3406	7.33106	584	0	38	21.0051	8.28118	640	1
TGFB1_rs8110090	614	67	3	608	67	3	1	645	68	5	577	66	1	0.335675	621	67	3	601	67	3	0.977315	1222	0.01	0.5	0.114648	0.119191	134	0.01	0.49	0.106567	0.116458	6	0.01	0.15	0.0716667	0.0470815	0.865092	1222	0	38	21.2259	8.01359	134	0	38	20.9627	8.58168	6	7
TGFB1_rs8179181	44	250	388	45	233	399	0.687862	49	244	423	40	239	364	0.47761	46	241	402	43	242	385	0.911697	89	0.01	0.48	0.110674	0.119343	483	0.01	0.48	0.115611	0.120075	787	0.01	0.5	0.112859	0.118055	0.745966	89	1	36	20.191	7.73257	483	0	38	21.6708	8.12387	787	0
TGFBR1_rs10988719	554	123	7	563	102	13	0.142735	584	120	14	533	105	6	0.301667	567	115	9	550	110	11	0.874468	1117	0.01	0.5	0.113393	0.116977	225	0.01	0.5	0.115644	0.127579	20	0.01	0.43	0.1065	0.117127	0.758043	1117	0	38	21.3465	7.99546	225	2	37	20.4711	8.44997	20	9
TGFBR1_rs11568785	596	83	5	563	106	9	0.0874562	619	90	9	540	99	5	0.231546	584	98	9	575	91	5	0.589956	1159	0.01	0.5	0.114599	0.119455	189	0.01	0.48	0.106931	0.1144	14	0.03	0.33	0.127143	0.118674	0.592007	1159	0	38	21.1398	8.22059	189	6	38	21.4497	7.28769	14	15
TGFBR1_rs334353	379	260	45	393	237	48	0.499356	407	260	51	365	237	42	0.913632	397	249	45	375	248	48	0.806024	772	0.01	0.49	0.113549	0.116943	497	0.01	0.5	0.115272	0.12196	93	0.01	0.47	0.106022	0.11663	0.971547	772	0	38	21.3562	7.82535	497	0	38	21.0664	8.51692	93	4
TGFBR1_rs334358	26	220	438	32	192	454	0.245071	32	211	475	26	201	417	0.725893	26	211	454	32	201	438	0.666611	58	0.01	0.47	0.0989655	0.111382	412	0.01	0.5	0.11517	0.12339	892	0.01	0.49	0.113924	0.117022	0.891964	58	8	35	21.931	7.67969	412	0	38	20.7524	8.53342	892	0
TGFBR2_rs1019856	8	149	527	11	161	506	0.527984	11	159	548	8	151	485	0.781669	10	155	526	9	155	507	0.945338	19	0.01	0.39	0.17	0.149481	310	0.01	0.5	0.104355	0.113315	1033	0.01	0.49	0.115421	0.119428	0.160817	19	0	31	18.3158	9.0065	310	5	38	21.0935	7.70455	1033	0
TGFBR2_rs1036095	388	252	44	396	237	45	0.773678	414	257	47	370	232	42	0.995982	396	253	42	388	236	47	0.722503	784	0.01	0.5	0.112117	0.118821	489	0.01	0.49	0.117239	0.12105	89	0.01	0.44	0.10764	0.104599	0.559457	784	0	38	21.2538	8.05096	489	0	38	21.0511	8.13887	89	3
TGFBR2_rs1078985	329	288	66	344	270	63	0.618065	342	301	74	331	257	55	0.296355	327	286	78	346	272	51	0.0463878	673	0.01	0.5	0.112036	0.118553	558	0.01	0.5	0.120251	0.121901	129	0.01	0.48	0.0948837	0.103555	0.198208	673	0	38	21.4146	7.95536	558	1	38	21.1595	8.13848	129	3
TGFBR2_rs1123686	51	275	358	63	280	335	0.359354	53	293	372	61	262	321	0.359486	58	283	350	56	272	343	0.989445	114	0.01	0.48	0.120175	0.130044	555	0.01	0.5	0.109982	0.116744	693	0.01	0.5	0.115541	0.118415	0.629865	114	2	37	20.7807	8.8225	555	0	38	21.2541	8.06329	693	0
TGFBR2_rs11466491	41	248	395	35	253	390	0.780134	35	270	413	41	231	372	0.436055	36	237	418	40	264	367	0.0955988	76	0.01	0.48	0.126316	0.125993	501	0.01	0.5	0.109321	0.118817	785	0.01	0.5	0.11521	0.117948	0.212909	76	2	37	23.0395	7.83401	501	0	38	20.99	8.10271	785	0
TGFBR2_rs11466511	416	231	37	415	234	29	0.623314	421	261	36	410	204	30	0.161542	428	230	33	403	235	33	0.775004	831	0.01	0.5	0.111131	0.118006	465	0.01	0.5	0.116925	0.120374	66	0.01	0.47	0.122576	0.116531	0.430724	831	0	38	21.201	8.31224	465	0	37	20.9376	7.81179	66	10
TGFBR2_rs11466512	64	285	335	71	291	316	0.616074	62	303	353	73	273	298	0.213284	65	292	334	70	284	317	0.799315	135	0.01	0.48	0.122	0.131545	576	0.01	0.5	0.108247	0.11376	651	0.01	0.5	0.116728	0.120174	0.581714	135	2	37	20.8741	8.60617	576	0	38	21.2118	8.13945	651	0
TGFBR2_rs11466515	336	280	63	318	282	71	0.633948	354	295	61	300	267	73	0.192756	336	280	66	318	282	68	0.821853	654	0.01	0.5	0.116529	0.120005	562	0.01	0.5	0.108203	0.113879	134	0.01	0.48	0.122836	0.131679	0.563135	654	0	38	21.263	7.92468	562	0	38	21.2402	8.17594	134	2
TGFBR2_rs11466521	37	232	415	30	235	413	0.705071	36	263	419	31	204	409	0.137415	33	231	427	34	236	401	0.74871	67	0.01	0.47	0.121194	0.116196	467	0.01	0.5	0.116574	0.120299	828	0.01	0.5	0.111413	0.11809	0.533125	67	10	38	23.1642	6.71181	467	0	37	20.9079	7.80764	828	0
TGFBR2_rs11466531	4	58	622	5	63	610	0.803049	4	58	656	5	63	576	0.459157	6	58	627	3	63	605	0.532244	9	0.01	0.32	0.0888889	0.103132	121	0.01	0.45	0.0978512	0.113278	1232	0.01	0.5	0.115398	0.119283	0.175694	9	10	28	17.4444	6.98411	121	0	38	21.3471	8.26409	1232	0
TGFBR2_rs1155705	290	322	72	291	307	80	0.685535	311	334	73	270	295	79	0.468908	293	313	85	288	316	67	0.390168	581	0.01	0.5	0.111583	0.120104	629	0.01	0.5	0.115183	0.115876	152	0.01	0.48	0.115329	0.12545	0.253599	581	0	38	21.0688	7.87808	629	0	38	21.2369	8.25082	152	4
TGFBR2_rs12490419	17	132	535	11	146	521	0.351941	16	136	566	12	142	490	0.342655	11	139	541	17	139	515	0.442862	28	0.01	0.43	0.113214	0.125198	278	0.01	0.49	0.11795	0.122962	1056	0.01	0.5	0.112547	0.117485	0.874335	28	4	37	22.1071	8.37253	278	0	38	20.9388	8.27505	1056	0
TGFBR2_rs17025795	1	87	596	5	86	587	0.309727	1	82	635	5	91	548	0.0709911	2	80	609	4	93	574	0.353261	6	0.01	0.39	0.151667	0.181815	173	0.01	0.48	0.109884	0.11172	1183	0.01	0.5	0.114024	0.119419	0.984436	6	13	37	21.8333	9.2826	173	2	35	20.5549	8.10495	1183	0
TGFBR2_rs17025824	619	64	1	623	55	0	0.4158	663	55	0	579	64	1	0.136118	641	50	0	601	69	1	0.049164	1242	0.01	0.5	0.113945	0.119192	119	0.01	0.44	0.107647	0.109333	1	0.48	0.48	0.48		0.208291	1242	0	38	21.0894	8.08681	119	4	38	22.437	7.9975	1	18
TGFBR2_rs17026240	535	143	6	533	136	9	0.675315	568	140	10	500	139	5	0.385432	551	134	6	517	145	9	0.402817	1068	0.01	0.5	0.111732	0.118488	279	0.01	0.48	0.122688	0.121034	15	0.01	0.24	0.0833333	0.078619	0.148533	1068	0	38	21.1433	8.17321	279	4	38	21.4516	7.80267	15	9
TGFBR2_rs17029848	2	99	583	5	122	551	0.0898738	3	117	598	4	104	536	0.902236	4	121	566	3	100	568	0.370396	7	0.03	0.21	0.114286	0.0756873	221	0.01	0.47	0.10267	0.112842	1134	0.01	0.5	0.115802	0.119988	0.312194	7	8	36	23.2857	10.8277	221	1	38	20.9005	8.51998	1134	0
TGFBR2_rs1808602	197	342	145	193	346	139	0.920075	210	362	146	180	326	138	0.821427	205	353	133	185	335	151	0.311284	390	0.01	0.5	0.109436	0.117148	688	0.01	0.5	0.115785	0.11962	284	0.01	0.49	0.114331	0.118899	0.522705	390	0	38	20.5667	8.24867	688	0	38	21.3328	8.04109	284	2
TGFBR2_rs2005061	17	132	535	10	148	519	0.246141	15	138	565	12	142	489	0.411764	11	140	540	16	140	514	0.529206	27	0.01	0.43	0.116296	0.126496	280	0.01	0.49	0.11775	0.122639	1054	0.01	0.5	0.112552	0.117586	0.839923	27	4	37	22.2593	8.4925	280	0	38	20.9929	8.32795	1054	0
TGFBR2_rs2276768	9	132	543	6	134	538	0.783312	11	146	561	4	120	520	0.188868	6	127	558	9	139	523	0.365636	15	0.01	0.33	0.112	0.10373	266	0.01	0.48	0.115602	0.115035	1081	0.01	0.5	0.11321	0.11988	0.598312	15	9	36	24.5333	7.93605	266	4	38	21.4173	7.54375	1081	0
TGFBR2_rs304839	450	210	24	456	208	14	0.273703	475	217	26	431	201	12	0.147274	443	229	19	463	189	19	0.135314	906	0.01	0.49	0.112561	0.11843	418	0.01	0.5	0.115957	0.119237	38	0.01	0.49	0.114737	0.122402	0.824529	906	0	38	21.3819	8.01269	418	1	38	20.9665	8.1549	38	0
TGFBR2_rs3087465	40	221	423	34	253	391	0.141655	37	241	440	37	233	374	0.47592	30	246	415	44	228	399	0.186079	74	0.01	0.47	0.12473	0.128193	474	0.01	0.49	0.108586	0.115535	814	0.01	0.5	0.115614	0.119665	0.453605	74	8	38	21.8649	8.60762	474	0	38	20.1603	7.94109	814	0
TGFBR2_rs3773634	329	288	67	344	270	64	0.618045	343	300	75	330	258	56	0.344264	328	285	78	345	273	53	0.0762949	673	0.01	0.5	0.112348	0.118844	558	0.01	0.5	0.119875	0.121584	131	0.01	0.48	0.0939695	0.103066	0.166291	673	0	38	21.3848	7.96956	558	1	38	21.1953	8.12268	131	3
TGFBR2_rs3773648		18	666		22	656	0.524968		15	703		25	619	0.0546715		18	673		22	649	0.522221						40	0.03	0.45	0.0935	0.096358	1322	0.01	0.5	0.114274	0.119299	0.858942						40	6	36	23.975	8.22282	1322	0
TGFBR2_rs3773663	113	332	239	107	358	213	0.270879	123	364	231	97	326	221	0.510074	102	357	232	118	333	220	0.363802	220	0.01	0.49	0.1175	0.117503	690	0.01	0.5	0.110174	0.116216	452	0.01	0.5	0.117124	0.123089	0.279163	220	4	37	22.1091	7.81971	690	0	38	21.013	7.98664	452	0
TGFBR2_rs6790424	529	147	8	507	160	11	0.474704	550	157	11	486	150	8	0.758886	528	153	10	508	154	9	0.927322	1036	0.01	0.49	0.115502	0.119455	307	0.01	0.5	0.103974	0.113122	19	0.01	0.39	0.17	0.149481	0.140246	1036	0	38	21.2751	8.17316	307	5	38	21.1466	7.7012	19	0
TGFBR2_rs764522	26	201	457	29	223	426	0.311575	29	213	476	26	211	407	0.45267	22	225	444	33	199	439	0.174898	55	0.01	0.45	0.120182	0.12379	424	0.01	0.49	0.10842	0.115042	883	0.01	0.5	0.115776	0.120166	0.620004	55	8	36	21	8.23498	424	0	38	20.4741	8.03799	883	0
TGFBR2_rs876688	83	295	306	91	316	271	0.201803	94	318	306	80	293	271	0.884129	77	322	292	97	289	285	0.143744	174	0.01	0.49	0.111092	0.11952	611	0.01	0.5	0.111064	0.116918	577	0.01	0.5	0.117192	0.120454	0.659922	174	0	37	21.9138	8.42776	611	0	38	20.9656	7.84212	577	0
TGFBR2_rs9867701	275	329	80	280	295	103	0.09245	281	337	100	274	287	83	0.434511	270	314	107	285	310	76	0.0675515	555	0.01	0.49	0.114775	0.120379	624	0.01	0.5	0.112292	0.115789	183	0.01	0.49	0.114973	0.123963	0.952719	555	0	38	21.5676	8.02503	624	0	38	20.8542	8.22884	183	0
TGFBR2_rs9881945	4	54	626	0	46	632	0.0992635	1	57	660	3	43	598	0.365813	4	42	645	0	58	613	0.0203087	4	0.02	0.32	0.18	0.157268	100	0.01	0.48	0.1183	0.125915	1258	0.01	0.5	0.113084	0.118044	0.735227	4	10	24	14.75	6.29153	100	4	36	20.81	7.4423	1258	0
TIMP2_rs2003241	575	104	5	572	99	7	0.792489	604	109	5	543	94	7	0.728101	581	104	6	566	99	6	0.986268	1147	0.01	0.5	0.113723	0.118693	203	0.01	0.47	0.111429	0.115358	12	0.01	0.39	0.145833	0.174067	0.887644	1147	0	38	21.2947	8.09145	203	2	38	20.9163	7.9757	12	1
TIMP2_rs2009196	402	244	38	402	237	39	0.962129	434	244	40	370	237	37	0.519655	396	253	42	408	228	35	0.407312	804	0.01	0.5	0.111704	0.116683	481	0.01	0.48	0.115052	0.120497	77	0.01	0.48	0.125455	0.128898	0.762584	804	0	38	21.3109	7.88177	481	0	38	21.2183	8.35664	77	1
TIMP2_rs2889529	230	330	124	207	335	136	0.411547	241	351	126	196	314	134	0.229182	215	350	126	222	315	134	0.38457	437	0.01	0.49	0.115378	0.121784	665	0.01	0.5	0.113173	0.118567	260	0.01	0.5	0.112038	0.114177	0.771972	437	0	38	21.0892	8.0071	665	2	38	21.4917	8.12925	260	0
TIMP2_rs3744790	25	222	436	25	219	434	0.994674	26	244	447	24	197	423	0.393793	24	216	451	26	225	419	0.568048	50	0.01	0.48	0.1228	0.126443	441	0.01	0.49	0.110476	0.120081	870	0.01	0.5	0.114701	0.117707	0.730527	50	9	36	20.38	7.8789	441	1	38	20.9252	7.91784	870	0
TIMP2_rs4789932	130	353	201	113	340	225	0.251589	130	370	218	113	323	208	0.742897	109	374	208	134	319	218	0.0320402	243	0.01	0.49	0.116708	0.121216	693	0.01	0.49	0.114315	0.11886	426	0.01	0.5	0.110869	0.117239	0.513574	243	1	38	21.1152	8.19513	693	0	38	21.3333	8.03802	426	0
TIMP2_rs4789933	612	71	1	603	74	1	0.896069	638	80	0	577	65	2	0.318129	616	74	1	599	71	1	1	1215	0.01	0.5	0.114683	0.119116	145	0.01	0.48	0.104759	0.115067	2	0.01	0.27	0.14	0.183848	0.689301	1215	0	38	21.084	8.10188	145	2	37	22.1241	7.87038	2	22
TIMP2_rs4789939	25	188	471	18	172	488	0.345613	26	190	502	17	170	457	0.589078	20	181	490	23	179	469	0.828686	43	0.01	0.45	0.128372	0.136538	360	0.01	0.49	0.110056	0.115989	959	0.01	0.5	0.114359	0.118939	0.787685	43	1	35	19.2791	7.87499	360	1	38	20.5806	7.86758	959	0
TIMP2_rs7342880	3	91	589	6	76	596	0.327329	5	94	618	4	73	567	0.595238	5	86	600	4	81	585	0.967155	9	0.01	0.39	0.146667	0.173853	167	0.01	0.47	0.120778	0.125045	1185	0.01	0.5	0.112177	0.117134	0.645636	9	1	31	16.4444	9.36898	167	2	38	20.7066	8.00325	1185	0
TIMP2_rs7502916	231	341	112	202	349	126	0.243344	240	362	116	193	328	122	0.24709	214	358	119	219	332	119	0.698554	433	0.01	0.49	0.11515	0.11962	690	0.01	0.5	0.112957	0.119459	238	0.01	0.5	0.113361	0.115425	0.793406	433	0	38	21.4365	7.92653	690	2	38	21.2855	8.25718	238	0
TIMP2_rs7502935	82	268	334	60	294	324	0.0953783	76	294	348	66	268	310	0.961791	69	289	333	73	273	325	0.828836	142	0.01	0.44	0.111338	0.106799	562	0.01	0.5	0.114858	0.123006	658	0.01	0.5	0.113146	0.117569	0.722545	142	0	36	21.7254	8.19803	562	1	38	21.5409	8.00841	658	0
TIMP2_rs8066695	183	368	133	175	350	153	0.369278	194	382	142	164	336	144	0.483204	176	382	133	182	336	153	0.124767	358	0.01	0.49	0.112821	0.119797	718	0.01	0.49	0.112298	0.117077	286	0.01	0.5	0.118147	0.121697	0.855244	358	0	36	21.0866	7.94525	718	1	38	21.4401	8.16453	286	0
TIMP2_rs8080307	3	97	584	1	105	572	0.502746	1	109	608	3	93	548	0.525829	2	92	597	2	110	559	0.263402	4	0.02	0.13	0.08	0.0454606	202	0.01	0.48	0.1	0.106878	1156	0.01	0.5	0.116168	0.120705	0.632255	4	2	12	8.5	4.43471	202	4	38	20.4505	7.59025	1156	0
TIMP2_rs9894295	508	162	14	497	165	14	0.969664	529	176	11	476	151	17	0.341922	505	172	13	500	155	15	0.686615	1005	0.01	0.5	0.111841	0.117478	327	0.01	0.48	0.117768	0.12156	28	0.01	0.48	0.136429	0.132168	0.361935	1005	0	38	21.3214	8.08281	327	1	38	20.6055	8.11461	28	10
TIMP2_rs9909232	24	213	447	15	209	454	0.349791	23	227	468	16	195	433	0.602972	18	210	463	21	212	438	0.724963	39	0.01	0.43	0.128718	0.125051	422	0.01	0.48	0.107204	0.115422	901	0.01	0.5	0.116038	0.119931	0.311092	39	2	36	20.4872	7.86355	422	1	38	20.5403	7.88016	901	0
TNFRSF6_rs1051070	548	125	11	545	126	7	0.686805	571	133	14	522	118	4	0.0996281	544	135	12	549	116	6	0.214238	1093	0.01	0.5	0.11409	0.119642	251	0.01	0.48	0.112869	0.117472	18	0.03	0.25	0.0988889	0.0744303	0.901337	1093	0	38	21.1674	8.04738	251	0	38	20.988	8.30734	18	17
TNFRSF6_rs1571011	231	336	117	228	332	118	0.991749	242	353	123	217	315	112	0.991729	228	330	133	231	338	102	0.141869	459	0.01	0.49	0.109651	0.114099	668	0.01	0.5	0.117216	0.122663	235	0.01	0.47	0.111404	0.116286	0.820788	459	2	38	20.9259	8.10352	668	0	38	21.2515	8.07849	235	1
TNFRSF6_rs2147419	354	271	59	347	259	72	0.44778	382	264	72	319	266	59	0.228967	358	268	65	343	262	66	0.947685	701	0.01	0.5	0.114708	0.119891	530	0.01	0.48	0.113566	0.119468	131	0.01	0.48	0.108473	0.109667	0.78796	701	0	38	21.281	8.09476	530	0	38	21.1906	8.14864	131	7
TNFRSF6_rs3218612	628	52	4	633	44	1	0.291964	659	55	4	602	41	1	0.309408	642	48	1	619	48	4	0.436059	1261	0.01	0.5	0.112506	0.118108	96	0.01	0.5	0.126979	0.123596	5	0.01	0.45	0.15	0.177904	0.349592	1261	0	38	21.1007	8.12014	96	2	37	22.5	7.57419	5	13
TNFRSF6_rs3758483	511	156	17	491	173	14	0.474827	534	169	15	468	160	16	0.735083	517	159	15	485	170	16	0.561586	1002	0.01	0.5	0.117156	0.121361	329	0.01	0.49	0.102736	0.109159	31	0.01	0.43	0.116774	0.126	0.413049	1002	0	38	21.4261	8.0734	329	0	38	20.6201	8.20089	31	6
TNFRSF6_rs4064	80	301	303	84	296	298	0.929251	94	302	322	70	295	279	0.264135	83	304	304	81	293	297	0.99391	164	0.01	0.48	0.116768	0.110924	597	0.01	0.5	0.109012	0.118146	601	0.01	0.5	0.117438	0.121324	0.244808	164	2	37	21.811	7.73374	597	0	38	21.0737	8.02792	601	0
TNFRSF6_rs4406737	141	322	221	131	322	225	0.826105	148	332	238	124	312	208	0.690704	134	320	237	138	324	209	0.461858	272	0.01	0.48	0.120478	0.120455	644	0.01	0.5	0.111413	0.118502	446	0.01	0.5	0.112758	0.118055	0.154925	272	2	38	21.3603	8.33405	644	0	38	21.1801	7.98006	446	0
TNFRSF6_rs6586165	187	316	181	176	355	147	0.0476728	194	347	177	169	324	151	0.762506	187	347	157	176	324	171	0.494726	363	0.01	0.49	0.118595	0.120471	671	0.01	0.5	0.1069	0.117112	328	0.01	0.5	0.122043	0.119557	0.0121278	363	1	38	21.0909	8.13661	671	0	38	21.0686	8.08064	328	2
TNFRSF6_rs7920305	530	146	8	552	112	14	0.0400525	569	137	12	513	121	10	0.981531	555	123	13	527	135	9	0.433143	1082	0.01	0.5	0.112255	0.11742	258	0.01	0.49	0.117791	0.123311	22	0.01	0.39	0.134545	0.129347	0.653662	1082	0	38	21.1257	7.98141	258	2	38	21.7403	8.34742	22	5
TNFRSF6_rs9325604	503	164	17	480	181	17	0.502528	517	187	14	466	158	20	0.345518	503	169	19	480	176	15	0.657476	983	0.01	0.5	0.116633	0.120678	345	0.01	0.5	0.106	0.112927	34	0.01	0.43	0.105588	0.118121	0.557244	983	0	38	21.3652	8.11412	345	0	38	20.8522	8.03688	34	6
TNFRSF6_rs982764	337	281	66	352	265	61	0.615787	359	289	70	330	257	57	0.815384	359	270	62	330	276	65	0.587205	689	0.01	0.48	0.112816	0.118464	546	0.01	0.5	0.113663	0.118353	127	0.01	0.49	0.118268	0.122384	0.749483	689	0	38	21.1364	8.01463	546	0	38	21.3791	8.19784	127	5
TNF_rs1799964	416	233	35	377	272	29	0.0649527	432	247	39	361	258	25	0.0605182	405	250	36	388	255	28	0.573729	793	0.01	0.49	0.114767	0.118138	505	0.01	0.5	0.111545	0.119685	64	0.01	0.47	0.116719	0.119696	0.757796	793	0	38	21.5662	8.1726	505	0	37	20.802	7.90547	64	4
TNF_rs1800629	52	256	376	47	290	341	0.133464	66	283	369	33	263	348	0.0149034	46	284	361	53	262	356	0.572723	99	0.01	0.49	0.121414	0.12654	546	0.01	0.5	0.113883	0.11814	717	0.01	0.49	0.112427	0.118161	0.972337	99	1	38	21.3939	8.84194	546	0	38	21.4505	8.11875	717	0
TRPC6_rs10219398	54	267	363	52	278	348	0.768487	51	275	392	55	270	319	0.157546	53	265	373	53	280	338	0.401983	106	0.01	0.48	0.108774	0.12213	545	0.01	0.5	0.121358	0.126158	711	0.01	0.5	0.108495	0.11197	0.371428	106	5	37	22.3491	8.09002	545	0	38	21.255	7.91354	711	0
TRPC6_rs10501979	5	122	557	4	123	551	0.986051	4	126	588	5	119	520	0.802004	7	123	561	2	122	547	0.296538	9	0.03	0.34	0.0877778	0.0997218	245	0.01	0.47	0.112245	0.119604	1108	0.01	0.5	0.114188	0.118721	0.926946	9	14	37	25.2222	8.21246	245	1	37	20.6653	8.08727	1108	0
TRPC6_rs10501985	135	350	199	125	337	216	0.524178	144	373	201	116	314	214	0.106144	140	354	197	120	333	218	0.227521	260	0.01	0.5	0.106346	0.111844	687	0.01	0.5	0.119432	0.121088	415	0.01	0.48	0.108699	0.118714	0.236462	260	2	38	21.1577	8.29303	687	1	38	21.1368	8.09592	415	0
TRPC6_rs10895115	312	315	57	294	307	77	0.166384	306	338	74	300	284	60	0.336405	318	307	66	288	315	68	0.511823	606	0.01	0.49	0.109538	0.117247	622	0.01	0.5	0.117701	0.119617	134	0.01	0.49	0.113582	0.121299	0.621925	606	0	38	20.8185	8.36067	622	1	38	21.4486	7.85003	134	0
TRPC6_rs10895126	173	338	173	171	338	169	0.98176	191	349	178	153	327	164	0.481456	186	342	163	158	334	179	0.248454	344	0.01	0.49	0.113198	0.117611	676	0.01	0.5	0.113328	0.117964	342	0.01	0.48	0.114795	0.121592	0.998249	344	0	38	20.8808	8.32925	676	0	38	21.1612	7.97435	342	0
TRPC6_rs10895150	582	98	4	584	92	2	0.680112	611	105	2	555	85	4	0.476692	583	105	3	583	85	3	0.403942	1166	0.01	0.5	0.114846	0.119776	190	0.01	0.48	0.106579	0.112487	6	0.03	0.3	0.108333	0.112502	0.639761	1166	0	38	21.2839	8.07832	190	0	38	20.8737	8.06028	6	9
TRPC6_rs11224782	43	222	419	34	233	411	0.507638	46	231	441	31	224	389	0.328991	29	237	425	48	218	405	0.0580705	77	0.01	0.5	0.128052	0.128022	455	0.01	0.49	0.107714	0.116275	830	0.01	0.5	0.11559	0.119108	0.202217	77	0	36	22.6364	8.45874	455	0	38	20.9385	7.99811	830	0
TRPC6_rs3824935	8	137	539	3	112	563	0.0679431	8	135	575	3	114	527	0.356427	6	131	554	5	118	548	0.796872	11	0.01	0.39	0.151818	0.130217	249	0.01	0.5	0.105502	0.111028	1102	0.01	0.5	0.115127	0.12024	0.416241	11	4	36	20.5455	11.1208	249	2	38	21.4578	7.88675	1102	0
TRPC6_rs3924457	5	86	593	6	93	579	0.795272	7	92	619	4	87	553	0.715726	5	82	604	6	97	568	0.349918	11	0.01	0.24	0.0745455	0.0663873	179	0.01	0.49	0.118994	0.129142	1172	0.01	0.5	0.113217	0.117419	0.901569	11	13	30	20.8182	4.75012	179	0	38	21.1117	8.92659	1172	0
TRPC6_rs4129254	272	319	93	271	320	87	0.920308	307	310	101	236	329	79	0.0139847	284	327	80	259	312	100	0.180707	543	0.01	0.5	0.119153	0.121567	639	0.01	0.49	0.109577	0.114147	180	0.01	0.5	0.111611	0.125717	0.615524	543	0	38	21.1805	8.06092	639	0	38	21.1768	7.95983	180	0
TRPC6_rs4272759	518	155	11	516	151	11	0.982452	544	162	12	490	144	10	0.991291	524	154	13	510	152	9	0.741151	1034	0.01	0.5	0.11441	0.12003	306	0.01	0.48	0.11268	0.115105	22	0.01	0.37	0.0922727	0.108009	0.77619	1034	0	38	21.1538	8.13134	306	1	37	21.1895	7.90165	22	7
TRPC6_rs4360666	10	149	525	7	146	525	0.793668	8	154	556	9	141	494	0.868838	8	155	528	9	140	522	0.762079	17	0.02	0.32	0.0982353	0.107018	295	0.01	0.44	0.10678	0.109028	1050	0.01	0.5	0.115848	0.121472	0.680462	17	10	37	22	8.77496	295	0	38	20.6237	7.86477	1050	0
TRPC6_rs4396256	41	233	410	35	246	397	0.605928	53	221	444	23	258	363	7.46551e-05	32	243	416	44	236	391	0.294058	76	0.01	0.5	0.123947	0.128365	479	0.01	0.49	0.108121	0.115063	807	0.01	0.5	0.115985	0.119906	0.475933	76	0	36	21.2368	8.67159	479	0	38	21.1127	8.08376	807	0
TRPC6_rs4466798	83	326	275	98	314	266	0.456026	91	334	293	90	306	248	0.62151	75	324	292	106	316	249	0.0141242	181	0.01	0.44	0.104862	0.114356	640	0.01	0.5	0.115781	0.119027	541	0.01	0.5	0.114104	0.119843	0.41376	181	5	38	21.884	7.50502	640	0	37	21.2703	7.99415	541	0
TRPC6_rs4492784	58	310	315	50	306	322	0.715602	61	322	335	47	294	302	0.714973	48	315	328	60	301	309	0.392054	108	0.01	0.49	0.0992593	0.10744	616	0.01	0.5	0.113734	0.116662	637	0.01	0.5	0.116138	0.1225	0.900814	108	4	37	20.8519	8.03941	616	0	38	21.1575	8.0304	637	1
TRPC6_rs4509717	203	361	120	216	339	123	0.573615	221	358	139	198	342	104	0.269656	203	360	128	216	340	115	0.506063	419	0.01	0.49	0.112697	0.122248	700	0.01	0.5	0.115971	0.118105	243	0.01	0.48	0.108683	0.114495	0.506881	419	0	38	21.4272	7.9935	700	1	38	21.2471	8.18773	243	2
TRPC6_rs4531428	23	196	464	22	215	441	0.475244	20	219	479	25	192	426	0.526278	16	202	473	29	209	432	0.0673411	45	0.01	0.43	0.094	0.105624	411	0.01	0.49	0.115669	0.117524	905	0.01	0.5	0.113801	0.119931	0.783359	45	6	37	20.3556	8.50977	411	0	38	20.9343	7.92914	905	1
TRPC6_rs6590877	203	339	142	198	335	145	0.955752	226	342	150	175	332	137	0.199511	220	329	142	181	345	145	0.140583	401	0.01	0.49	0.112618	0.115883	674	0.01	0.5	0.115148	0.119637	287	0.01	0.48	0.111638	0.120783	0.913482	401	0	38	20.9352	8.17715	674	0	38	21.2389	7.94881	287	0
TRPC6_rs7936514	151	337	195	138	332	208	0.601965	147	353	218	142	316	185	0.709006	150	335	206	139	334	197	0.866332	289	0.01	0.49	0.109273	0.12015	669	0.01	0.5	0.11846	0.120581	403	0.01	0.49	0.109007	0.11456	0.287734	289	2	37	21.6782	8.06034	669	0	38	21.148	7.97417	403	2
TRPC6_rs7945727	566	114	4	559	117	2	0.740085	589	127	2	536	104	4	0.477494	576	113	2	549	118	4	0.557702	1125	0.01	0.5	0.115031	0.119708	231	0.01	0.5	0.106494	0.112595	6	0.03	0.44	0.133333	0.16765	0.887366	1125	0	38	21.2329	8.00728	231	0	38	21.1082	8.41435	6	8
UCP1_rs2043125	348	291	45	385	245	48	0.0528743	383	292	43	350	244	50	0.317605	362	275	54	371	261	39	0.272372	733	0.01	0.48	0.103574	0.112914	536	0.01	0.5	0.124459	0.12391	93	0.01	0.49	0.130968	0.126311	0.00484159	733	0	38	20.985	8.06335	536	0	38	21.3638	8.14174	93	1
UCP1_rs6536991	392	248	44	385	252	41	0.914266	412	255	51	365	245	34	0.296524	381	269	41	396	231	44	0.227004	777	0.01	0.5	0.109009	0.117906	500	0.01	0.5	0.11866	0.118206	85	0.01	0.49	0.126824	0.127962	0.120978	777	0	38	21.1441	8.1072	500	0	38	21.244	8.12283	85	2
UCP1_rs6822807	360	270	54	381	246	51	0.413004	385	275	58	356	241	47	0.777177	374	267	50	367	249	55	0.724832	741	0.01	0.5	0.110027	0.118327	516	0.01	0.5	0.117151	0.118974	105	0.01	0.49	0.12219	0.120304	0.362703	741	0	38	20.9663	8.11123	516	0	38	21.2771	8.08899	105	1
UCP2_rs2306820	344	270	70	326	299	53	0.116885	355	304	59	315	265	64	0.53535	341	289	61	329	280	62	0.969663	670	0.01	0.5	0.116672	0.118202	569	0.01	0.5	0.111898	0.121717	123	0.01	0.45	0.105447	0.107179	0.396622	670	2	38	21.206	8.05712	569	0	38	21.1775	8.1055	123	6
UCP2_rs643064	18	159	507	10	140	527	0.148204	14	162	541	14	137	493	0.81997	14	146	530	14	153	504	0.758079	28	0.02	0.27	0.0828571	0.0851951	299	0.01	0.5	0.118395	0.12118	1034	0.01	0.5	0.113095	0.118774	0.394102	28	9	37	21.6786	8.62835	299	2	38	21.3946	8.07711	1034	0
UCP2_rs655717	200	341	143	210	344	124	0.45208	216	368	134	194	317	133	0.619931	220	338	133	190	347	134	0.366842	410	0.01	0.48	0.114488	0.115741	685	0.01	0.5	0.11708	0.124602	267	0.01	0.5	0.103633	0.10701	0.513043	410	3	38	20.8829	8.00281	685	0	38	21.3504	8.13123	267	2
UCP2_rs659366	93	325	266	87	303	288	0.407308	87	348	283	93	280	271	0.148527	88	311	292	92	317	262	0.480829	180	0.01	0.5	0.107111	0.106946	628	0.01	0.49	0.116067	0.124293	554	0.01	0.5	0.113069	0.115947	0.891658	180	2	38	20.9667	8.25562	628	0	38	21.4666	8.08846	554	1
UCP2_rs660339	105	345	234	108	312	257	0.254241	109	355	254	104	302	237	0.65524	105	329	257	108	328	234	0.671021	213	0.01	0.5	0.101925	0.104324	657	0.01	0.49	0.11653	0.123317	491	0.01	0.5	0.115112	0.118251	0.488674	213	1	38	20.9718	8.18242	657	0	38	21.4247	8.01585	491	1
UCP3_rs1800849	45	268	371	36	233	409	0.0713247	52	280	386	29	221	394	0.00823651	36	254	401	45	247	379	0.488565	81	0.01	0.47	0.113827	0.114756	501	0.01	0.5	0.120259	0.123229	780	0.01	0.5	0.10941	0.116085	0.169788	81	2	37	20.7407	8.66859	501	0	38	21.7665	7.97241	780	0
UCP3_rs2734827	86	288	302	82	320	274	0.209324	88	315	310	80	293	266	0.787911	85	292	307	83	316	269	0.195228	168	0.01	0.5	0.122083	0.123438	608	0.01	0.5	0.106579	0.11583	576	0.01	0.49	0.11901	0.11996	0.163424	168	4	38	21.3988	8.20847	608	0	38	21.2615	8.10855	576	1
UCP3_rs3781907	328	282	74	365	259	54	0.0486598	342	307	69	351	234	59	0.0339275	352	287	52	341	254	76	0.0412869	693	0.01	0.5	0.110895	0.119649	541	0.01	0.5	0.117394	0.119259	128	0.01	0.47	0.112891	0.111533	0.21022	693	0	38	20.9278	8.10805	541	0	38	21.4455	7.9232	128	2
UCP3_rs668514	39	230	415	37	256	385	0.284945	39	252	427	37	234	373	0.844889	37	234	420	39	252	380	0.295259	76	0.01	0.47	0.126184	0.125188	486	0.01	0.5	0.106667	0.11856	800	0.01	0.49	0.116725	0.118097	0.170472	76	4	38	20.2632	8.87298	486	0	38	21.249	7.87753	800	1
UCRC_rs140135	393	257	34	356	279	43	0.153409	387	291	40	362	245	37	0.644291	386	264	41	363	272	36	0.656301	749	0.01	0.5	0.115447	0.12221	536	0.01	0.48	0.11166	0.114513	77	0.01	0.49	0.11026	0.11396	0.910684	749	0	38	21.271	8.10707	536	0	38	21.0504	8.11179	77	7
UQCRB_rs10105238	4	91	589	5	122	551	0.0480132	4	118	596	5	95	544	0.616297	2	101	588	7	112	552	0.122912	9	0.03	0.26	0.0688889	0.0740683	213	0.01	0.5	0.111362	0.112642	1140	0.01	0.5	0.114447	0.120089	0.833178	9	12	30	19.3333	5.91608	213	2	38	21.1643	7.82812	1140	0
UQCRB_rs2292835	99	333	252	98	328	252	0.994228	94	356	268	103	305	236	0.309227	95	346	250	102	315	254	0.491749	197	0.01	0.48	0.118832	0.123078	661	0.01	0.5	0.117625	0.124894	504	0.01	0.5	0.106448	0.108062	0.806042	197	0	38	21.3096	8.65086	661	0	38	21.2194	8.10454	504	2
UQCRB_rs7002575	147	337	199	158	341	179	0.475746	146	379	192	159	299	186	0.0453859	150	343	198	155	335	180	0.708283	305	0.01	0.5	0.118459	0.123101	678	0.01	0.49	0.114794	0.121097	378	0.01	0.5	0.107963	0.110693	0.840885	305	0	38	21.141	8.29175	678	0	38	21.2743	8.09298	378	2
UQCRC1_rs11715496		26	658		31	647	0.501163		28	690		29	615	0.590631		31	660		26	645	0.591089						57	0.01	0.37	0.0870175	0.0856272	1305	0.01	0.5	0.114828	0.119838	0.245878						57	5	38	20.2105	8.41287	1305	0
UQCRC1_rs2633958	7	111	566	12	107	559	0.497849	6	101	611	13	117	514	0.01725	12	116	563	7	102	562	0.390024	19	0.01	0.3	0.0773684	0.092005	218	0.01	0.48	0.113624	0.117486	1125	0.01	0.5	0.114284	0.119334	0.198476	19	0	36	19.5263	10.0519	218	6	38	21.0367	8.08016	1125	0
UQCRC1_rs9830581	645	37	2	626	50	2	0.303789	670	45	3	601	42	1	0.765552	643	45	3	628	42	1	0.743379	1271	0.01	0.5	0.114933	0.119961	87	0.01	0.35	0.0904598	0.093931	4	0.07	0.33	0.215	0.135031	0.0436758	1271	0	38	21.262	8.08322	87	3	37	20.0575	8.06566	4	24
UQCRC2_rs10521119	667	17		651	27		0.127389	694	24		624	20		0.878509	672	19		646	25		0.3586	1318	0.01	0.5	0.113695	0.118315	44	0.01	0.43	0.112727	0.131509						0.41264	1318	0	38	21.2269	8.08568	44	5	37	20.5455	8.05347
UQCRC2_rs11648723	0	82	602	4	70	603	0.0891246	3	93	621	1	59	584	0.0388375	2	73	615	2	79	590	0.809417	4	0.01	0.04	0.0275	0.0125831	152	0.01	0.5	0.116184	0.129553	1205	0.01	0.49	0.113668	0.117463	0.219116	4	15	23	19	3.3665	152	3	38	21.0855	8.29501	1205	0
UQCRC2_rs4783436	9	137	538	9	128	541	0.858725	11	135	572	7	130	507	0.642272	8	140	543	10	125	536	0.671478	18	0.01	0.45	0.116111	0.148488	265	0.01	0.48	0.107094	0.115297	1079	0.01	0.5	0.115236	0.119061	0.509683	18	7	33	19.5556	7.39015	265	3	38	21.3547	8.173	1079	0
UQCRC2_rs4850	3	80	601	2	76	600	0.874136	2	75	641	3	81	560	0.401502	3	76	612	2	80	589	0.77488	5	0.03	0.33	0.182	0.147885	156	0.01	0.48	0.115	0.119415	1201	0.01	0.5	0.113206	0.118526	0.527678	5	8	31	18.4	9.50263	156	3	37	21.3782	7.64903	1201	0
UQCRC2_rs7196121	434	221	28	441	212	25	0.828638	461	233	24	414	200	29	0.503828	448	213	30	427	220	23	0.554436	875	0.01	0.5	0.112343	0.117163	433	0.01	0.5	0.116051	0.121266	53	0.01	0.45	0.114528	0.125538	0.909671	875	0	38	21.1154	8.02922	433	0	38	21.5566	8.24661	53	4
UQCRFS1_rs1013424	141	336	205	145	349	180	0.392434	143	365	209	143	320	176	0.523944	146	346	195	140	339	190	0.986618	286	0.01	0.5	0.120105	0.1214	685	0.01	0.49	0.11365	0.120465	385	0.01	0.49	0.108519	0.112873	0.490412	286	0	37	20.6818	8.21937	685	0	38	21.3299	8.01711	385	2
UQCRFS1_rs3760841	13	184	487	16	197	464	0.526388	11	194	513	18	187	438	0.165136	21	193	476	8	188	475	0.0600425	29	0.01	0.41	0.112759	0.123863	381	0.01	0.5	0.115774	0.120211	951	0.01	0.49	0.112934	0.118097	0.90326	29	8	35	21.4138	8.21809	381	1	38	21.2415	7.92893	951	0
UQCRFS1_rs8109749	6	99	579	5	112	560	0.535259	7	109	602	4	102	537	0.732013	4	113	573	7	98	566	0.435571	11	0.03	0.28	0.0972727	0.0962383	211	0.01	0.5	0.105355	0.115434	1139	0.01	0.5	0.115435	0.119536	0.411269	11	11	31	20.2727	7.37687	211	0	36	21.3223	7.8182	1139	0
UQCRFS1_rs9304664	88	333	263	100	323	255	0.608993	93	343	282	95	313	236	0.484673	99	324	268	89	332	250	0.62334	188	0.01	0.5	0.121489	0.120617	656	0.01	0.5	0.117729	0.123698	518	0.01	0.49	0.105676	0.111099	0.269918	188	3	37	20.8457	8.08594	656	0	38	21.0899	8.26006	518	2
UQCRH_rs3753362	17	146	521	16	141	521	0.956457	15	160	543	18	127	499	0.37575	16	136	539	17	151	503	0.409576	33	0.01	0.45	0.120606	0.130957	287	0.01	0.5	0.118362	0.123814	1042	0.01	0.5	0.11215	0.116942	0.8162	33	8	38	20.697	8.58955	287	0	38	21.547	7.6004	1042	0
UQCRH_rs3766248	661	23		666	12		0.085536	702	16		625	19		0.493283	676	15		651	20		0.393704	1327	0.01	0.5	0.113904	0.11832	35	0.01	0.48	0.104571	0.134303						0.338981	1327	0	38	21.1093	8.08977	35	11	38	24.8286	6.98943
UQCRH_rs4660920	386	254	43	355	271	52	0.261405	376	287	55	365	238	40	0.228157	371	271	49	370	254	46	0.853857	741	0.01	0.49	0.116896	0.121179	525	0.01	0.5	0.109619	0.114906	95	0.01	0.48	0.110947	0.121051	0.682867	741	0	38	21.2173	8.21518	525	1	38	20.9695	7.88751	95	5
UQCR_rs887390	1	57	626	0	62	616	0.63188	0	60	658	1	59	584	0.563083	0	50	641	1	69	601	0.049164	1	0.05	0.05	0.05		119	0.01	0.49	0.0997479	0.109556	1242	0.01	0.5	0.115048	0.119541	0.333348	1	9	9	9		119	4	36	19.8908	7.86301	1242	0
VDR_rs10735810	89	334	261	97	331	250	0.753447	94	351	273	92	314	238	0.793917	98	335	258	88	330	253	0.852753	186	0.01	0.48	0.0944086	0.105071	665	0.01	0.5	0.118211	0.121826	511	0.01	0.49	0.114755	0.118811	0.0546061	186	3	38	21.043	8.09393	665	0	38	21.1955	8.20305	511	1
VDR_rs11168275	401	248	35	396	243	39	0.877751	418	256	44	379	235	30	0.501763	407	250	34	390	241	40	0.703189	797	0.01	0.49	0.114555	0.11796	491	0.01	0.5	0.110774	0.117414	74	0.01	0.48	0.123243	0.135334	0.747096	797	0	38	21.1368	8.16554	491	0	38	21.0631	7.85988	74	2
VDR_rs11574024	5	111	568	2	127	549	0.27089	6	120	592	1	118	525	0.177142	3	121	567	4	117	550	0.937555	7	0.03	0.45	0.231429	0.157631	238	0.01	0.5	0.106513	0.115016	1117	0.01	0.5	0.114449	0.118931	0.0375854	7	7	37	22.8571	10.574	238	0	38	21.2899	8.16005	1117	0
VDR_rs11574026	5	135	544	10	148	520	0.25459	5	144	569	10	139	495	0.239196	7	142	542	8	141	522	0.926956	15	0.03	0.44	0.127333	0.138743	283	0.01	0.5	0.106042	0.109602	1064	0.01	0.5	0.115498	0.120752	0.967042	15	9	35	20.7333	6.9227	283	1	38	20.9329	7.85817	1064	0
VDR_rs11574042	4	95	585	4	102	572	0.887466	5	103	610	3	94	547	0.8738	2	96	593	6	101	564	0.282534	8	0.03	0.43	0.1775	0.156182	197	0.01	0.5	0.110457	0.1162	1157	0.01	0.5	0.113768	0.118846	0.278299	8	9	27	18	6.45866	197	1	38	21.2132	8.55088	1157	0
VDR_rs11574050	1	70	613	3	65	610	0.586139	2	65	651	2	70	572	0.489499	2	68	621	2	67	602	1	4	0.03	0.3	0.1475	0.11471	135	0.01	0.49	0.111111	0.121923	1223	0.01	0.5	0.113835	0.118442	0.478692	4	18	33	24.75	6.99405	135	1	36	20.8667	8.56912	1223	0
VDR_rs1540339	90	314	280	79	309	290	0.642704	105	319	294	64	304	276	0.0317388	93	313	285	76	310	285	0.490839	169	0.01	0.49	0.118698	0.130615	623	0.01	0.49	0.113403	0.116911	570	0.01	0.5	0.112456	0.117133	0.96859	169	0	37	21.5799	8.25096	623	0	38	21.2247	7.88386	570	0
VDR_rs2238136	51	268	365	51	256	371	0.867638	52	270	396	50	254	340	0.682456	51	254	386	51	270	350	0.3754	102	0.01	0.5	0.131078	0.137213	524	0.01	0.48	0.115153	0.11923	736	0.01	0.5	0.11019	0.115483	0.550216	102	0	38	20.6863	8.85972	524	2	38	21.8187	8.02122	736	0
VDR_rs2238140	200	334	150	190	329	159	0.769138	189	356	173	201	307	136	0.111728	205	334	152	185	329	157	0.658759	390	0.01	0.49	0.110769	0.113703	663	0.01	0.5	0.114374	0.119232	309	0.01	0.49	0.115793	0.123981	0.988916	390	1	38	21.2821	7.8758	663	0	38	21.0845	8.21715	309	0
VDR_rs2239179	210	346	128	196	356	126	0.734356	244	342	132	162	360	122	0.00118737	201	368	122	205	334	132	0.410271	406	0.01	0.49	0.12197	0.125722	702	0.01	0.5	0.110783	0.11761	254	0.01	0.48	0.108346	0.109633	0.410303	406	0	37	21.9975	8.13786	702	0	38	20.8718	8.04662	254	1
VDR_rs2254210	90	316	278	97	298	283	0.671965	101	320	297	86	294	264	0.899865	104	302	285	83	312	276	0.305854	187	0.01	0.49	0.104118	0.115389	614	0.01	0.49	0.116075	0.117554	561	0.01	0.5	0.114207	0.121091	0.319879	187	0	37	20.3797	8.10218	614	1	38	21.3029	8.07526	561	0
VDR_rs2408876	246	324	114	243	316	118	0.92588	256	349	113	233	291	119	0.305857	238	330	123	251	310	109	0.472931	489	0.01	0.49	0.113272	0.117306	640	0.01	0.5	0.111203	0.116603	232	0.01	0.48	0.121509	0.127503	0.881663	489	0	38	20.7689	7.90062	640	1	38	21.5734	8.35167	232	0
VDR_rs2853563		33	651		44	634	0.197904		49	669		28	616	0.0595311		34	657		43	628	0.242883						77	0.01	0.47	0.103506	0.115152	1285	0.01	0.5	0.114272	0.118937	0.463353						77	0	37	20.7273	8.21045	1285	0
VDR_rs3847987	11	144	529	10	147	521	0.929286	12	147	559	9	144	491	0.661886	9	143	539	12	148	511	0.636996	21	0.03	0.41	0.0933333	0.112576	291	0.01	0.48	0.119244	0.121834	1050	0.01	0.5	0.112524	0.117984	0.71854	21	9	35	20.0952	6.60231	291	0	37	21.6392	8.03808	1050	0
VDR_rs4516035	210	347	127	221	337	120	0.736982	226	365	127	205	319	120	0.864058	224	342	125	207	342	122	0.818175	431	0.01	0.5	0.115406	0.121455	684	0.01	0.5	0.109444	0.114659	247	0.01	0.49	0.122308	0.124701	0.600917	431	0	38	21.3341	8.08989	684	0	38	21.0307	8.14531	247	0
VDR_rs4760658	280	321	83	302	296	79	0.386663	310	320	87	272	297	75	0.857205	300	305	85	282	312	77	0.683152	582	0.01	0.5	0.113247	0.118735	617	0.01	0.5	0.112885	0.116988	162	0.01	0.49	0.118642	0.125765	0.92107	582	0	38	21.2921	8.11135	617	0	38	21.2058	8.12792	162	0
VDR_rs731236	229	335	120	234	327	117	0.925849	264	340	114	199	322	123	0.0508147	232	335	124	231	327	113	0.85953	463	0.01	0.49	0.119093	0.12433	662	0.01	0.5	0.112417	0.118138	237	0.01	0.49	0.10654	0.10865	0.618932	463	0	38	21.4471	7.90261	662	0	38	21.1692	8.30554	237	1
VDR_rs7975232	214	328	142	207	324	147	0.899991	202	350	166	219	302	123	0.0371286	214	328	149	207	324	140	0.936274	421	0.01	0.49	0.108575	0.110819	652	0.01	0.5	0.115291	0.121587	289	0.01	0.49	0.117405	0.123335	0.977844	421	1	38	21.2043	7.97055	652	0	38	21.089	8.13451	289	0
VEGF_rs2146323	88	323	273	85	304	289	0.582332	97	335	286	76	292	276	0.435339	94	308	289	79	319	273	0.438903	173	0.01	0.49	0.106705	0.116968	627	0.01	0.49	0.114242	0.119406	562	0.01	0.5	0.11516	0.118602	0.762925	173	0	36	20.9942	8.11723	627	1	38	21.4322	8.0761	562	0
VEGF_rs3024987	12	142	530	18	142	518	0.527862	13	146	559	17	138	489	0.49429	17	139	535	13	145	513	0.660999	30	0.01	0.35	0.0773333	0.0855382	284	0.01	0.5	0.11	0.113875	1048	0.01	0.49	0.115697	0.120687	0.318604	30	5	35	18.9333	7.88684	284	0	38	21.3345	8.06625	1048	0
VEGF_rs3024994	2	62	620	1	65	612	0.834943	1	67	650	2	60	582	0.85833	3	69	619	0	58	613	0.176709	3	0.03	0.39	0.16	0.19975	127	0.01	0.48	0.107402	0.109546	1232	0.01	0.5	0.114196	0.11949	0.88134	3	16	38	30	12.1655	127	1	38	20.811	8.53539	1232	0
VEGF_rs3025007	144	320	217	131	325	221	0.713607	138	352	226	137	293	212	0.405006	152	306	231	123	339	207	0.0563168	275	0.01	0.5	0.114255	0.120959	645	0.01	0.5	0.114403	0.119962	438	0.01	0.48	0.112329	0.115678	0.878391	275	4	37	21.5818	7.91582	645	0	38	21.0729	7.95968	438	0
VEGF_rs3025020	65	302	317	80	280	317	0.311139	83	313	321	62	269	313	0.2816	73	299	318	72	283	316	0.920056	145	0.01	0.49	0.104759	0.112491	582	0.01	0.49	0.119828	0.124784	634	0.01	0.5	0.110174	0.114248	0.770675	145	2	37	21.6414	7.87549	582	0	38	21.7491	8.05696	634	0
VEGF_rs3025028	220	342	121	205	350	123	0.741656	225	366	126	200	326	118	0.943397	221	357	113	204	335	131	0.307269	425	0.01	0.49	0.115035	0.11801	692	0.01	0.5	0.113121	0.120513	244	0.01	0.48	0.112951	0.115414	0.579734	425	1	37	20.8588	7.90473	692	0	38	21.5578	8.04354	244	1
VEGF_rs3025035	1	89	594	5	96	577	0.217155	1	106	611	5	79	560	0.0948236	3	89	599	3	96	572	0.790928	6	0.01	0.18	0.0533333	0.0628225	185	0.01	0.5	0.110541	0.11679	1171	0.01	0.49	0.114466	0.119206	0.309025	6	10	37	20	9.46573	185	1	36	20.3027	8.25117	1171	0
VEGF_rs3025053	12	133	539	11	120	547	0.683489	9	150	559	14	103	527	0.0339874	13	131	547	10	122	539	0.808671	23	0.01	0.43	0.0873913	0.106396	253	0.01	0.48	0.120395	0.124019	1086	0.01	0.5	0.112652	0.117682	0.670085	23	10	36	21.6522	7.64323	253	1	38	21.996	8.28486	1086	0
VEGF_rs833069	314	291	79	311	299	68	0.632116	332	313	73	293	277	74	0.738405	323	296	72	302	294	75	0.787473	625	0.01	0.5	0.10656	0.116972	590	0.01	0.5	0.118915	0.11813	147	0.01	0.47	0.122789	0.127203	0.0735339	625	0	38	20.9856	8.19287	590	0	38	21.4068	8.03604	147	4
WISP1_rs10108233	122	318	243	114	316	248	0.850944	124	331	262	112	303	229	0.926077	117	326	248	119	308	243	0.884138	236	0.01	0.48	0.125297	0.126145	634	0.01	0.5	0.110221	0.115208	491	0.01	0.5	0.112627	0.119485	0.320946	236	0	38	21.5339	8.74673	634	0	38	21.0946	7.96203	491	2
WISP1_rs10956697	12	112	560	6	118	554	0.354309	6	122	590	12	108	524	0.276583	5	122	564	13	108	550	0.115702	18	0.01	0.41	0.124444	0.127889	230	0.01	0.48	0.110391	0.109987	1114	0.01	0.5	0.114165	0.120371	0.899692	18	4	30	18.8889	6.14424	230	4	38	20.1609	8.02046	1114	0
WISP1_rs2013158	43	255	386	50	237	391	0.552319	53	263	402	40	229	375	0.59189	49	261	381	44	231	396	0.351215	93	0.01	0.48	0.114839	0.12167	492	0.01	0.49	0.11372	0.117549	777	0.01	0.5	0.113488	0.119239	0.892683	93	6	36	22.2258	7.47624	492	0	38	21.4959	7.98611	777	0
WISP1_rs2272645	125	338	221	128	335	215	0.952185	139	344	235	114	329	201	0.488983	119	339	233	134	334	203	0.261037	253	0.01	0.49	0.111621	0.121728	673	0.01	0.48	0.109926	0.116881	436	0.01	0.5	0.120619	0.11971	0.272731	253	0	37	20.9802	8.14475	673	0	38	21.4933	8.1026	436	1
WISP1_rs2929973	497	162	25	480	179	19	0.380343	531	167	20	446	174	24	0.13886	505	166	20	472	175	24	0.483147	977	0.01	0.5	0.115138	0.121515	341	0.01	0.5	0.107067	0.109835	44	0.01	0.41	0.132045	0.121475	0.423473	977	0	38	21.5394	8.15128	341	1	38	20.2903	7.99048	44	9
WISP1_rs2930000	337	282	65	335	286	57	0.765	373	286	59	299	282	63	0.114469	342	281	68	330	287	54	0.455047	672	0.01	0.5	0.11506	0.119195	568	0.01	0.48	0.107676	0.115991	122	0.01	0.5	0.133852	0.12684	0.027342	672	0	38	21.3646	8.05141	568	0	38	20.838	8.04102	122	1
WISP1_rs2977523	131	323	230	138	316	224	0.859593	143	336	239	126	303	215	0.986776	135	320	236	134	319	218	0.806454	269	0.01	0.5	0.11197	0.118263	639	0.01	0.49	0.110501	0.115361	454	0.01	0.5	0.119119	0.123596	0.538405	269	2	37	20.7844	8.04221	639	0	38	21.4147	7.85259	454	0
WISP1_rs2977527	69	280	335	67	290	321	0.78668	75	302	341	61	268	315	0.786106	64	297	330	72	273	326	0.547969	136	0.01	0.5	0.122059	0.129518	570	0.01	0.49	0.11093	0.114216	656	0.01	0.5	0.114299	0.120293	0.768194	136	3	37	21.5515	7.72185	570	0	38	21.1702	7.94074	656	0
WISP1_rs2977536	257	308	119	254	313	111	0.852809	251	345	122	260	276	108	0.0960229	259	322	110	252	299	120	0.580483	511	0.01	0.5	0.1209	0.124801	621	0.01	0.49	0.106216	0.11175	230	0.01	0.48	0.117696	0.122362	0.257338	511	1	38	21.4638	8.00797	621	0	38	20.9501	7.98804	230	1
WISP1_rs2977537	12	160	512	11	161	506	0.9834	8	178	532	15	143	486	0.139416	8	159	524	15	162	494	0.259452	23	0.01	0.48	0.132609	0.136289	321	0.01	0.49	0.102212	0.107234	1018	0.01	0.5	0.116847	0.12157	0.32021	23	6	34	19	9.04534	321	2	38	21.0031	7.88016	1018	0
WISP1_rs2977552	6	121	557	2	106	570	0.210733	6	125	587	2	102	540	0.343102	3	104	584	5	123	543	0.183151	8	0.03	0.48	0.16625	0.170958	227	0.01	0.49	0.111101	0.111479	1127	0.01	0.5	0.113807	0.119735	0.769782	8	11	33	24.125	6.1281	227	0	38	21.2423	8.08409	1127	0
WISP1_rs3739261	295	315	73	292	294	92	0.234434	311	323	84	276	286	81	0.882127	283	314	94	304	295	71	0.121345	587	0.01	0.5	0.114514	0.119062	609	0.01	0.5	0.110936	0.116043	165	0.01	0.49	0.121212	0.127451	0.91201	587	0	38	21.1652	8.10374	609	0	38	21.0772	7.98244	165	5
WISP1_rs3739262	60	273	351	71	259	348	0.531754	76	281	361	55	251	338	0.406637	70	271	350	61	261	349	0.772068	131	0.01	0.48	0.108702	0.114377	532	0.01	0.49	0.114906	0.119234	699	0.01	0.5	0.113648	0.119249	0.931824	131	4	37	21.687	7.89945	532	0	38	21.2895	8.04336	699	0
WISP1_rs6982341	120	353	211	121	335	222	0.697788	135	350	233	106	338	200	0.333823	134	352	205	107	336	228	0.11481	241	0.01	0.5	0.125602	0.126868	688	0.01	0.5	0.112398	0.11634	433	0.01	0.49	0.10903	0.11759	0.313164	241	2	38	21.2656	7.97992	688	0	38	21.2442	8.08353	433	0
WISP1_rs6992383	242	335	107	245	321	112	0.812642	262	341	115	225	315	104	0.830547	231	337	123	256	319	96	0.0916671	487	0.01	0.49	0.111006	0.118169	656	0.01	0.5	0.112104	0.117352	219	0.01	0.5	0.124247	0.123841	0.266773	487	0	38	21.4825	8.28077	656	0	38	20.9634	8.08081	219	5
[truncated: 196 more columns]
