# Supplementary material for: Multiple Superoxide Dismutase 1/Splicing Factor Serine Alanine 15 Variants Are Associated With the Development and Progression of Diabetic Nephropathy
Source: Oxford University Press journal article supplement (doi:10.2337/db07-1059), 2007-10-04
Supplement: db071059ola6.xls [file db071059ola6.xls]

## Sheet: sex_marker_description
Locus	marker_id	marker_id_link	Gene_ID	gene_id_link	Allele_A	Allele_B	Reference_Sequence	Submitted_Sequence	A_Freq_female	B_Freq_female	A_std_female	B_std_female	AA_Freq_female	AB_Freq_female	BB_Freq_female	AA_std_female	AB_std_female	BB_std_female	AA_D_female	AB_D_female	BB_D_female	NIndiv_female	NAllele_female	PIC_female	Het_female	Div_female	Chisq_female	ProbChisq_female	ProbExact_female	count_AA_female	count_AB_female	count_BB_female	MeanGC_female	A_Freq_male	B_Freq_male	A_std_male	B_std_male	NIndiv_male	NAllele_male	count_AA_male	count_BB_male	MeanGC_male	Chromosome_location	chromosome	location_delta	Cluster	Build	Locus_ID	Location
ACE2_rs2106809	rs2106809	http://www.ncbi.nlm.nih.gov/SNP/snp_ref.cgi?rs=2106809	ACE2	http://www.ncbi.nlm.nih.gov/entrez/query.fcgi?db=gene&cmd=Retrieve&dopt=full_report&list_uids=59272	A	G	GTCTTGTAAGAAAACATGATGAGAAATGGTCAACCACACATACCACAATGGCAGAGAAAGGGAGAGAACTTTGGAAACCTGTTTTAACCAAGCTTTTTTTTCCATATCTCTATCTGATGG[A/G]CTTCTCCACACTTCTACATCAGCAGCTTTATGACACTATACTGATCAAGTTTGGATGCCTTCTATTATTTTGAGGTATATTCTCACAGCTTGACATAAGGATCACCACTTAAGGATACTG	GTCTTGTAAGAAAACATGATGAGAAATGGTCAACCACACATACCACAATGGCAGAGAAAGGGAGAGAACTTTGGAAACCTGTTTTAACCAAGCTTTTTTTTCCATATCTCTATCTGATGG[A/G]CTTCTCCACACTTCTACATCAGCAGCTTTATGACACTATACTGATCAAGTTTGGATGCCTTCTATTATTTTGAGGTATATTCTCACAGCTTGACATAAGGATCACCACTTAAGGATACTG	0.807453	0.192547	0.0109936	0.0109936	0.652174	0.310559	0.0372671	0.0061357	0.0061357	0.0061357	0.000192894	0.000192894	0.000192894	644	2	0.262601	0.310559	0.310945	0.000991324	0.974883	1	420	200	24	0.671312	0.810321	0.189679	0.0146413	0.0146413	717	2	581	136	0.67672	15377718	23			35	59272	intron
ACE2_rs4646188	rs4646188	http://www.ncbi.nlm.nih.gov/SNP/snp_ref.cgi?rs=4646188	ACE2	http://www.ncbi.nlm.nih.gov/entrez/query.fcgi?db=gene&cmd=Retrieve&dopt=full_report&list_uids=59272	A	G	AGCAAAGGTTCAGCAATGCACAAATAGTAAATTATGGTGCAATTATCTGAATAAATTTTATAAGGCAAATAGAAATATGATTAGATATTCTACTCAGAAACGTAGAATTTTAGTTGAATG[A/G]ACAAATATACATAATTATAACTATAATACCATTTCATCAACAGAAGGGAACACAGAGAATTTTTTTTTTTGAGACAGAGTCTCACTTTGTCACCCAGGCTGGAGTGCAGTGGCATGATCT	agatcatgccactgcactccagcctgggtgacaaagtgagactctgtctcaaaaaaaaaaaTTCTCTGTGTTCCCTTCTGTTGATGAAATGGTATTATAGTTATAATTATGTATATTTGT[C/T]CATTCAACTAAAATTCTACGTTTCTGAGTAGAATATCTAATCATATTTCTATTTGCCTTATAAAATTTATTCAGATAATTGCACCATAATTTACTATTTGTGCATTGCTGAACCTTTGCT	0.862578	0.137422	0.00970815	0.00970815	0.746894	0.231366	0.0217391	0.00491289	0.00491289	0.00491289	0.00285423	0.00285423	0.00285423	644	2	0.208973	0.231366	0.237075	0.37338	0.541168	0.5096	481	149	14	0.694527	0.866295	0.133705	0.0127012	0.0127012	718	2	622	96	0.694529	15361000	23	-3775		35	59272	intron
ACE2_rs4646190	rs4646190	http://www.ncbi.nlm.nih.gov/SNP/snp_ref.cgi?rs=4646190	ACE2	http://www.ncbi.nlm.nih.gov/entrez/query.fcgi?db=gene&cmd=Retrieve&dopt=full_report&list_uids=59272	A	G	TTTATACACCAATATGACCCTGTAAACCAAAAACTATTTGAGATAGGTCTCAATCAATTCACAAGTTTATTTTGCCAAGGTTAAGAACATGCCCAGAAGAAAAGAACACAGAATTTATAG[A/G]AACAGTCTGTGGTTTGTGCCTTTCTCCAAAAATAATTTTGAGGGCTTCAACATTTATAGGAGAAAAGTGAGCTGGAGAGGATAGTGGGAGGGCATGGTAATTCACACATTGCAAGAGAAA	tttctcttgcaatgtgtgaattaccatgccctcccactatcctctccagctcacttttctcctataaatgttgaagccctcaaaattatttttggagaaaggcacaaaccacagactgtt[C/T]ctataaattctgtgttcttttcttctgggcatgttcttaaccttggcaaaataaacttgtgaattgattgagacctatctcaaatagtttttggtttacaGGGTCATATTGGTGTATAAA	0.950311	0.0496894	0.00589448	0.00589448	0.900621	0.0993789		0.000585786	0.000585786		-0.00246904	-0.00246904		644	2	0.0899813	0.0993789	0.0944408	1.76069	0.184538	0.3957	580	64	0	0.721324	0.962396	0.0376045	0.00709961	0.00709961	718	2	691	27	0.721268	15357225	23	-5383		35	59272	intron
ACE2_rs4646191	rs4646191	http://www.ncbi.nlm.nih.gov/SNP/snp_ref.cgi?rs=4646191	ACE2	http://www.ncbi.nlm.nih.gov/entrez/query.fcgi?db=gene&cmd=Retrieve&dopt=full_report&list_uids=59272	A	G	ATAAAAATTTTTAAAAAATCAGACAGTAAAGCTCATTATGTAGTTATCTCTTAGTTTTAATTAATTCAGCCAGAATATACCCTTGGAAAATAGCTATGTCTTCAAAAGACTAATTTAATA[A/G]CATTCATAAAGTGCATTGCATGGCCAAAAATGTACAGTGAAAGCCCTAATAATTCCTCTCAGGCACCACACTTCATGTACTCCTGGCAGAGAGAATTTAATAAAATTGAAATCTTACTTA	TAAGTAAGATTTCAATTTTATTAAATTCTCTCTGCCAGGAGTACATGAAGTGTGGTGCCTGAGAGGAATTATTAGGGCTTTCACTGTACATTTTTGGCCATGCAATGCACTTTATGAATG[C/T]TATTAAATTAGTCTTTTGAAGACATAGCTATTTTCCAAGGGTATATTCTGGCTGAATTAATTAAAACTAAGAGATAACTACATAATGAGCTTTACTGTCTGattttttaaaaatttttat	1		0		1			1.49167e-154			0			644	1	0	0	0	0			644	0	0	0.675694	1		0		718	1	718	0	0.675662	15351842	23	-1378		35	59272	intron
ACE2_rs879922	rs879922	http://www.ncbi.nlm.nih.gov/SNP/snp_ref.cgi?rs=879922	ACE2	http://www.ncbi.nlm.nih.gov/entrez/query.fcgi?db=gene&cmd=Retrieve&dopt=full_report&list_uids=59272	C	G	GTTTTACAGATTAATAGCCCTTTCACATAAATGATGCAAATCCATCCTTATAACAGGTCGATAATATTATTTTCATTTTACAAATAAACTGAGCTCCAGCAAATTCAAGGACTGGGGTTA[C/G]TAGGTGAAGAACATATGTTTTTGGACTTCAAGTTAAAAATTCTCTATCACAATGTACAATAAACTGCCAGTAACAAGAAGACAAAACTACTTTTTATTTCTCCCAATGATACTATTGATT	AATCAATAGTATCATTGGGAGAAATAAAAAGTAGTTTTGTCTTCTTGTTACTGGCAGTTTATTGTACATTGTGATAGAGAATTTTTAACTTGAAGTCCAAAAACATATGTTCTTCACCTA[C/G]TAACCCCAGTCCTTGAATTTGCTGGAGCTCAGTTTATTTGTAAAATGAAAATAATATTATCGACCTGTTATAAGGATGGATTTGCATCATTTATGTGAAAGGGCTATTAATCTGTAAAAC	0.371894	0.628106	0.0139043	0.0139043	0.153727	0.436335	0.409938	0.00926979	0.00926979	0.00926979	0.0154213	0.0154213	0.0154213	644	2	0.35805	0.436335	0.467178	2.80686	0.0938619	0.0911	99	281	264	0.596832	0.35376	0.64624	0.0178439	0.0178439	718	2	254	464	0.596888	15350464	23	4541871		35	59272	intron
AGTR2_rs17231429	rs17231429	http://www.ncbi.nlm.nih.gov/SNP/snp_ref.cgi?rs=17231429	AGTR2	http://www.ncbi.nlm.nih.gov/entrez/query.fcgi?db=gene&cmd=Retrieve&dopt=full_report&list_uids=186	A	C	ATAGATTAGTACTGGATTATTCAGGCTTTAGGCATATGCTTCTTTAAAAA[A/C]GCTATAAATTATATTCCTCTTGCATTTCACTTGAGTGGAGGTTTATAGTT	ATAGATTAGTACTGGATTATTCAGGCTTTAGGCATATGCTTCTTTAAAAA[A/C]GCTATAAATTATATTCCTCTTGCATTTCACTTGAGTGGAGGTTTATAGTT	0.475117	0.524883	0.0137881	0.0137881	0.22084	0.508554	0.270607	0.00983176	0.00983176	0.00983176	-0.00489601	-0.00489601	-0.00489601	643	2	0.37438	0.508554	0.498762	0.247839	0.618601	0.6336	142	327	174	0.734308	0.486072	0.513928	0.0186526	0.0186526	718	2	349	369	0.735498	111781398	23			35.1	186	intron
AGTR2_rs17237792	rs17237792	http://www.ncbi.nlm.nih.gov/SNP/snp_ref.cgi?rs=17237792	AGTR2	http://www.ncbi.nlm.nih.gov/entrez/query.fcgi?db=gene&cmd=Retrieve&dopt=full_report&list_uids=186	A	G	TTTTGGAATTAGAAAACACTTACTGAAGACGAATAGCTATGGGAAGAACA[A/G]GATAACCCGTGACCAAGTCCTGAAGATGGCAGCTGCTGTTGTTCTGGCCT	TTTTGGAATTAGAAAACACTTACTGAAGACGAATAGCTATGGGAAGAACA[A/G]GATAACCCGTGACCAAGTCCTGAAGATGGCAGCTGCTGTTGTTCTGGCCT		1		0			1			1.49167e-154			0	644	1	0	0	0	0			0	0	644	0.7646		1		0	718	1	0	718	0.76454	111780548	23	21815087		35.1	186	nonsynonymous
NDUFA1_rs2301637	rs2301637	http://www.ncbi.nlm.nih.gov/SNP/snp_ref.cgi?rs=2301637	NDUFA1	http://www.ncbi.nlm.nih.gov/entrez/query.fcgi?db=gene&cmd=Retrieve&dopt=full_report&list_uids=4694	A	T	AAAAAAAAAAAAGAAATATCTAGTTGTTGTCTTTTGGGACACTAAGAAACAACAGCTGTAGATCACACGTGAAGAACAATAACAAAATCAAAAAGTAAATAAATTTATATCCTGTACTCT[A/T]GAGATGATGTGAAGGACTAGGAAGAGGGGAAAATGAATCCTGATGTAAAAAAACAAGATCTCGCAGTAAATTCCTAAAGGCTTGCAAGAGAAAGTGGGGAATAAAAAAGTCAAGGGTGGC	gccACCCTTGACTTTTTTATTCCCCACTTTCTCTTGCAAGCCTTTAGGAATTTACTGCGAGATCTTGTTTTTTTACATCAGGATTCATTTTCCCCTCTTCCTAGTCCTTCACATCATCTC[A/T]AGAGTACAGGATATAAATTTATTTACTTTTTGATTTTGTTATTGTTCTTCACGTGTGATCTACAGCTGTTGTTTCTTAGTGTCCCAAAAGACAACAACTAGATATTTCtttttttttttt	0.0520186	0.947981	0.00611481	0.00611481	0.0015528	0.100932	0.897516	0.00152857	0.00152857	0.00152857	-0.00115314	-0.00115314	-0.00115314	644	2	0.0937619	0.100932	0.0986254	0.352156	0.552895	1	1	65	578	0.652508	0.0544693	0.945531	0.0084812	0.0084812	716	2	39	677	0.648643	118788782	23	7935		35	4694	intron
NDUFA1_rs7881648	rs7881648	http://www.ncbi.nlm.nih.gov/SNP/snp_ref.cgi?rs=7881648	NDUFA1	http://www.ncbi.nlm.nih.gov/entrez/query.fcgi?db=gene&cmd=Retrieve&dopt=full_report&list_uids=4694	A	G	TCTGCAGAGCGAAGAGTGTGAGGCAGAAGAGAGGGACCAGAGAGGTTGGCAGGGCCCAGAACGTGAATGTCTCCCCCTGGGTGTCGGAATTCCTCCTGAGGGCGACTGGGAAGTCTAGCA[A/G]GAGGTAGGAGAGTGATGTGACTTGCGCACATCTGCCTGGCTGCTCTGCACAGTGGTTCTCAGCTGGGTGAGTTTGCCTCCCAGGGCATATTGCAACGACTGCAGACATTTTTCCTTGAGG	TCTGCAGAGCGAAGAGTGTGAGGCAGAAGAGAGGGACCAGAGAGGTTGGCAGGGCCCAGAACGTGAATGTCTCCCCCTGGGTGTCGGAATTCCTCCTGAGGGCGACTGGGAAGTCTAGCA[A/G]GAGGTAGGAGAGTGATGTGACTTGCGCACATCTGCCTGGCTGCTCTGCAcagtggttctcagctgggtgagtttgcctcccagggcatattgcaacgactgcagacatttttccttgagg	0.968944	0.0310559	0.00683563	0.00683563	0.968944		0.0310559	0.00641106		0.00641106	0.0300914		0.0300914	644	2	0.0583719	0	0.0601829	644	4.50819e-142	0	624	0	20	0.455751	0.98468	0.0153203	0.00458373	0.00458373	718	2	707	11	0.455611	118796717	23			35	4694	.
[truncated: 22 more columns]
