# Supplementary material for: Multiple Superoxide Dismutase 1/Splicing Factor Serine Alanine 15 Variants Are Associated With the Development and Progression of Diabetic Nephropathy
Source: Oxford University Press journal article supplement (doi:10.2337/db07-1059), 2007-10-04
Supplement: db071059ola7.xls [file db071059ola7.xls]

## Sheet: female_sex_covariates
	cohort							treatment							stimulated c-peptide																age of diabetes diagnosis																age
Locus	AA_0_cohort_F	AB_0_cohort_F	BB_0_cohort_F	AA_1_cohort_F	AB_1_cohort_F	BB_1_cohort_F	Pvalue_cohort_F	AA_0_trx_F	AB_0_trx_F	BB_0_trx_F	AA_1_trx_F	AB_1_trx_F	BB_1_trx_F	Pvalue_trx_F	AA_N_b_bcval5_F	AA_MIN_b_bcval5_F	AA_MAX_b_bcval5_F	AA_MEAN_b_bcval5_F	AA_STD_b_bcval5_F	AB_N_b_bcval5_F	AB_MIN_b_bcval5_F	AB_MAX_b_bcval5_F	AB_MEAN_b_bcval5_F	AB_STD_b_bcval5_F	BB_N_b_bcval5_F	BB_MIN_b_bcval5_F	BB_MAX_b_bcval5_F	BB_MEAN_b_bcval5_F	BB_STD_b_bcval5_F	b_bcval5_KW_Pvalue_F	AA_N_agediag_F	AA_MIN_agediag_F	AA_MAX_agediag_F	AA_MEAN_agediag_F	AA_STD_agediag_F	AB_N_agediag_F	AB_MIN_agediag_F	AB_MAX_agediag_F	AB_MEAN_agediag_F	AB_STD_agediag_F	BB_N_agediag_F	BB_MIN_agediag_F	BB_MAX_agediag_F	BB_MEAN_agediag_F	BB_STD_agediag_F	cagediag_KW_Pvalue_F	AA_N_b_age_F	AA_MIN_b_age_F	AA_MAX_b_age_F
ACE2_rs2106809	215	103	10	205	97	14	0.666533	199	108	9	221	92	15	0.156987	420	0.01	0.5	0.110333	0.119992	200	0.01	0.47	0.10345	0.107388	24	0.01	0.33	0.0983333	0.103742	0.978348	420	0	38	20.8071	8.37791	200	3	38	20.13	8.42186	24	2	32	19.75	7.77538	0.568785	420	13	39
ACE2_rs4646188	250	70	8	231	79	6	0.497819	240	70	6	241	79	8	0.739275	481	0.01	0.5	0.11052	0.118327	149	0.01	0.47	0.101074	0.108473	14	0.01	0.31	0.0835714	0.0891504	0.621063	481	0	38	20.5925	8.31416	149	1	37	20.3423	8.48351	14	8	33	21.6429	9.35297	0.856171	481	13	39
ACE2_rs4646190	298	30		282	34		0.512655	287	29		293	35		0.598647	580	0.01	0.5	0.106655	0.114381	64	0.01	0.48	0.117656	0.126098						0.487683	580	0	38	20.6155	8.37993	64	5	35	20.0312	8.27497						0.525592	580	13	39
ACE2_rs879922	52	143	133	47	138	131	0.936808	43	132	141	56	149	123	0.152446	99	0.01	0.45	0.104545	0.115496	281	0.01	0.5	0.108363	0.119443	264	0.01	0.47	0.108295	0.111688	0.919128	99	4	38	20.8889	8.04818	281	0	38	20.6762	8.53889	264	0	38	20.3068	8.31832	0.852531	99	13	39
AGTR2_rs17231429	69	167	92	73	160	82	0.749143	70	162	83	72	165	91	0.923741	142	0.01	0.48	0.119789	0.124082	327	0.01	0.5	0.106881	0.113368	174	0.01	0.47	0.1	0.112404	0.44248	142	6	37	20.7042	7.52753	327	0	38	20.4985	8.64461	174	0	38	20.5977	8.52193	0.983203	142	13	39
NDUFA1_rs2301637	0	25	303	1	40	275	0.0308635	0	33	283	1	32	295	0.895626	1	0.03	0.03	0.03		65	0.01	0.37	0.0770769	0.0926978	578	0.01	0.5	0.111332	0.117449	0.0207701	1	22	22	22		65	8	36	20.4462	7.8542	578	0	38	20.5675	8.43385	0.960051	1	33	33
NDUFA1_rs7881648	321		7	303		13	0.175734	306		10	318		10	1	624	0.01	0.5	0.108974	0.116413						20	0.01	0.26	0.0695	0.0763286	0.183511	624	0	38	20.508	8.37906						20	9	33	22.1	7.95977	0.400584	624	13	39
[truncated: 189 more columns]
