# Supplementary material for: Multiple Superoxide Dismutase 1/Splicing Factor Serine Alanine 15 Variants Are Associated With the Development and Progression of Diabetic Nephropathy
Source: Oxford University Press journal article supplement (doi:10.2337/db07-1059), 2007-10-04
Supplement: db071059ola10.xls [file db071059ola10.xls]

## Sheet: lmaf_covariates
	cohort							sex							treatment							stimulated c-peptide																age of diabetes diagnosis
Locus	AA_0_cohort	AB_0_cohort	AA_1_cohort	AB_1_cohort	BB_0_cohort	BB_1_cohort	Pvalue_cohort	AA_m_sex	AB_m_sex	AA_f_sex	AB_f_sex	BB_m_sex	BB_f_sex	Pvalue_sex	AA_0_trx	AB_0_trx	AA_1_trx	AB_1_trx	BB_0_trx	BB_1_trx	Pvalue_trx	AA_N_b_bcval5	AA_MIN_b_bcval5	AA_MAX_b_bcval5	AA_MEAN_b_bcval5	AA_STD_b_bcval5	AB_N_b_bcval5	AB_MIN_b_bcval5	AB_MAX_b_bcval5	AB_MEAN_b_bcval5	AB_STD_b_bcval5	BB_N_b_bcval5	BB_MIN_b_bcval5	BB_MAX_b_bcval5	BB_MEAN_b_bcval5	BB_STD_b_bcval5	b_bcval5_KW_Pvalue	AA_N_agediag	AA_MIN_agediag	AA_MAX_agediag	AA_MEAN_agediag	AA_STD_agediag	AB_N_agediag	AB_MIN_agediag	AB_MAX_agediag	AB_MEAN_agediag	AB_STD_agediag	BB_N_agediag	BB_MIN_agediag
ABCA1_rs12684473	678	6	675	3			0.5064	712	6	641	3			0.51219	687	4	666	5			0.749752	1353	0.01	0.5	0.113444	0.118421	9	0.01	0.39	0.146667	0.162019						0.772198	1353	0	38	21.1752	8.07113	9	12	36	25.6667	9.06918
ADIPOQ_rs9877202	684	0	676	2			0.247619	718	0	642	2			0.223389	690	1	670	1			1	1360	0.01	0.5	0.113801	0.118743	2	0.01	0.03	0.02	0.0141421						0.0815134	1360	0	38	21.2169	8.07794	2	6	20	13	9.89949
ADPRTL2_rs3093927		4		6	680	672	0.545681		5		5	713	639	1		6		4	685	667	0.753266						10	0.01	0.16	0.066	0.0535828	1352	0.01	0.5	0.114016	0.118998	0.297769						10	10	34	17.8	7.81452	1352	0
ADRB2_rs1800888		7		16	677	662	0.0606973		17		6	701	638	0.0560099		13		10	678	661	0.675786						23	0.01	0.4	0.124783	0.0952924	1339	0.01	0.5	0.113473	0.119093	0.24872						23	8	37	21.6087	8.54262	1339	0
AGTR1_rs17230701		0		2	684	675	0.247251		1		1	716	643	1		2		0	689	670	0.499751						2	0.03	0.04	0.035	0.00707107	1359	0.01	0.5	0.113804	0.1188	0.487669						2	16	17	16.5	0.707107	1359	0
AGTR1_rs17231175		1		1	683	677	1		0		2	718	642	0.223389		0		2	691	669	0.242528						2	0.03	0.19	0.11	0.113137	1360	0.01	0.5	0.113669	0.118759	0.914306						2	23	24	23.5	0.707107	1360	0
AGTR1_rs17231189	683	1	677	1			1	717	1	643	1			1	690	1	670	1			1	1360	0.01	0.5	0.113625	0.118719	2	0.03	0.25	0.14	0.155563						0.77485	1360	0	38	21.2088	8.07364	2	6	31	18.5	17.6777
AGTR1_rs17231210	682	2	675	3			0.68567	716	2	641	3			0.671935	688	3	669	2			1	1357	0.01	0.5	0.113847	0.118829	5	0.03	0.19	0.064	0.0705691						0.457096	1357	0	38	21.1835	8.08415	5	22	34	27	5.56776
AGTR1_rs17236869		4		1	680	677	0.374105		1		4	717	640	0.195376		1		4	690	667	0.211371						5	0.03	0.41	0.218	0.136088	1357	0.01	0.5	0.113279	0.11853	0.064136						5	19	31	25	4.63681	1357	0
APOB_rs17240611	675	9	669	9			1	711	7	633	11			0.246929	682	9	662	9			1	1344	0.01	0.5	0.113973	0.118704	18	0.01	0.45	0.0905556	0.120366						0.279454	1344	0	38	21.2158	8.09169	18	10	33	20.3889	7.53922
APOB_rs17240910		0		1	684	677	0.497797		0		1	718	643	0.472834		0		1	691	670	0.492658						1	0.01	0.01	0.01		1361	0.01	0.5	0.11374	0.118721	0.102453						1	9	9	9		1361	0
APOB_rs17246814		2		1	682	676	1		3		0	714	644	0.251608		1		2	690	668	0.619016						3	0.03	0.48	0.29	0.233024	1358	0.01	0.5	0.113328	0.118241	0.152511						3	16	33	27	9.53939	1358	0
APOC1_rs10408994		0		1	684	677	0.497797		1		0	717	644	1		0		1	691	670	0.492658						1	0.01	0.01	0.01		1361	0.01	0.5	0.11374	0.118721	0.102453						1	13	13	13		1361	0
APOC1_rs10424339		1		1	683	677	1		2		0	716	644	0.50111		0		2	691	669	0.242528						2	0.01	0.08	0.045	0.0494975	1360	0.01	0.5	0.113765	0.118761	0.337881						2	13	14	13.5	0.707107	1360	0
APOC4_rs12721108		14		10	669	668	0.537675		16		8	702	635	0.216301		12		12	679	658	1						24	0.01	0.41	0.106667	0.118125	1337	0.01	0.5	0.113628	0.118659	0.989099						24	7	36	21.0417	7.58992	1337	0
ATP1A1_rs1407717	681	3	676	2			1	715	3	642	2			1	687	4	670	1			0.374351	1357	0.01	0.5	0.113515	0.118493	5	0.03	0.45	0.154	0.181879						0.61938	1357	0	38	21.2122	8.08367	5	12	33	19.2	8.40833
ATPAF1_rs604264		9		4	675	674	0.264591		7		6	711	638	1		9		4	682	667	0.265212						13	0.01	0.33	0.0707692	0.0832127	1349	0.01	0.5	0.114077	0.118948	0.361928						13	13	36	23.6923	8.27027	1349	0
C10orf110_rs10508207		12		8	672	670	0.500325		13		7	705	637	0.367512		8		12	683	659	0.373775						20	0.02	0.28	0.0975	0.0869286	1342	0.01	0.5	0.113905	0.119128	0.970338						20	9	35	23.8	7.17892	1342	0
C20orf44_rs6120916		1		0	683	678	1		0		1	718	643	0.472834		1		0	690	671	1						1	0.26	0.26	0.26		1361	0.01	0.5	0.113556	0.118688	0.209112						1	28	28	28		1361	0
CASP3_rs4647620		0		1	684	677	0.497797		1		0	717	644	1		0		1	691	670	0.492658						1	0.03	0.03	0.03		1361	0.01	0.5	0.113725	0.118733	0.406799						1	19	19	19		1361	0
COL4A1_rs3742205		1		1	683	677	1		1		1	717	643	1		1		1	690	670	1						2	0.02	0.3	0.16	0.19799	1360	0.01	0.5	0.113596	0.118664	0.943542						2	10	20	15	7.07107	1360	0
COL4A1_rs666338	684	0	677	1			0.497797	717	1	644	0			1	691	0	670	1			0.492658	1361	0.01	0.5	0.11374	0.118721	1	0.01	0.01	0.01							0.102453	1361	0	38	21.2109	8.0825	1	13	13	13
COX5B_rs1800648	676	8	672	6			0.789472	709	9	639	5			0.431293	688	3	660	11			0.0319692	1348	0.01	0.5	0.113694	0.118607	14	0.01	0.4	0.110714	0.133097						0.617067	1348	0	38	21.1929	8.09657	14	10	32	22.3571	6.74374
COX5B_rs2071038	682	2	675	3			0.68567	715	3	642	2			1	687	4	670	1			0.374351	1357	0.01	0.5	0.113751	0.118868	5	0.03	0.18	0.09	0.065192						0.927154	1357	0	38	21.2071	8.07317	5	8	38	20.6	11.5239
EDNRA_rs9308220	684	0	677	1			0.497797	718	0	643	1			0.472834	691	0	670	1			0.492658	1361	0.01	0.5	0.113505	0.11861	1	0.33	0.33	0.33							0.140361	1361	0	38	21.1969	8.08026	1	32	32	32
FLT1_rs7981680		15		10	669	668	0.420134		14		11	704	633	0.840832		13		12	678	659	1						25	0.01	0.37	0.1104	0.10002	1337	0.01	0.5	0.113725	0.119063	0.56575						25	12	33	22.72	6.69278	1337	0
HGF_rs2057935		2		2	682	676	1		1		3	717	641	0.349519		1		3	690	668	0.367254						4	0.03	0.44	0.1625	0.193455	1358	0.01	0.5	0.11352	0.118508	0.68179						4	16	31	22.75	6.18466	1358	0
HGF_rs5745663	681	3	678	0			0.249464	717	1	642	2			0.605473	690	1	669	2			0.619288	1359	0.01	0.5	0.113429	0.118501	3	0.07	0.44	0.22	0.194679						0.124287	1359	0	38	21.2024	8.08476	3	14	31	22.3333	8.5049
HGF_rs5745747	683	1	677	1			1	717	1	643	1			1	691	0	669	2			0.242528	1360	0.01	0.5	0.113699	0.118773	2	0.03	0.15	0.09	0.0848528						0.969186	1360	0	38	21.2037	8.08848	2	22	22	22	0
HGF_rs5745777		1		3	683	675	0.372256		2		2	716	642	1		2		2	689	669	1						4	0.01	0.07	0.0325	0.0262996	1358	0.01	0.5	0.113903	0.118797	0.0603419						4	2	37	14.5	15.4164	1358	0
HIF1A_rs1957756	683	1	671	7			0.0377721	713	5	641	3			0.728994	687	4	667	4			1	1354	0.01	0.5	0.113671	0.118728	8	0.01	0.29	0.1125	0.123837						0.793845	1354	0	38	21.2267	8.09001	8	11	26	17.5	5.97614
IGF1_rs5742623	676	8	673	5			0.579247	711	7	638	6			1	684	7	665	6			1	1349	0.01	0.5	0.113625	0.118671	13	0.03	0.44	0.117692	0.127747						0.64187	1349	0	38	21.1935	8.08901	13	11	36	22.3846	7.58879
IGF1_rs5742637		4		3	680	675	1		2		5	716	639	0.265634		4		3	687	668	1						7	0.01	0.33	0.0871429	0.111761	1355	0.01	0.5	0.113801	0.118769	0.602647						7	12	36	23.5714	8.16205	1355	0
INSR_rs10404318	677	7	670	8			0.801751	711	7	636	8			0.796069	683	8	664	7			1	1347	0.01	0.5	0.114491	0.119036	15	0.01	0.18	0.0393333	0.0411386						0.00197169	1347	0	38	21.2301	8.08502	15	5	29	18.9333	7.78705
LARP5_rs2275677	676	8	671	7			1	708	10	639	5			0.309913	681	10	666	5			0.29985	1347	0.01	0.5	0.113593	0.118785	15	0.01	0.34	0.12	0.115573						0.818242	1347	0	38	21.1693	8.06564	15	6	37	24.4	9.23348
LDLR_rs17242739		1		0	683	678	1		0		1	718	643	0.472834		0		1	691	670	0.492658						1	0.15	0.15	0.15		1361	0.01	0.5	0.113637	0.118751	0.438381						1	28	28	28		1361	0
LEPR_rs9436744	674	10	668	9			1	710	7	632	12			0.173944	681	9	661	10			0.820436	1342	0.01	0.5	0.113085	0.118354	19	0.03	0.36	0.137368	0.124179						0.339551	1342	0	38	21.1669	8.08985	19	9	35	23.3684	7.31217
NDUFA10_rs3792084	672	12	668	10			0.830474	704	14	636	8			0.39036	680	11	660	11			1	1340	0.01	0.5	0.113985	0.119262	22	0.01	0.27	0.0940909	0.0774387						0.783392	1340	0	38	21.1761	8.08933	22	10	36	22.9545	7.63125
NFKB1_rs4648007		1		2	683	676	0.623076		3		0	715	644	0.251665		0		3	691	668	0.119302						3	0.03	0.09	0.07	0.034641	1359	0.01	0.5	0.11376	0.118817	0.95088						3	20	28	24.6667	4.16333	1359	0
NFKB1_rs4648062	682	2	678	0			0.499642	717	1	643	1			1	690	1	670	1			1	1360	0.01	0.5	0.113485	0.118681	2	0.17	0.3	0.235	0.0919239						0.109933	1360	0	38	21.2007	8.08637	2	20	28	24	5.65685
NFKB1_rs4648074	684	0	677	1			0.497797	717	1	644	0			1	690	1	671	0			1	1361	0.01	0.5	0.113718	0.118738	1	0.04	0.04	0.04							0.878062	1361	0	38	21.2116	8.08171	1	12	12	12
NFKB1_rs4648143		11		11	673	667	1		16		6	702	638	0.0830447		10		12	681	659	0.671329						22	0.03	0.48	0.0972727	0.120995	1340	0.01	0.5	0.113933	0.1187	0.757758						22	0	33	18.9545	7.93712	1340	0
NFKB1_rs4648144		4		5	680	673	0.752106		4		5	714	639	0.742765		3		6	688	665	0.335461						9	0.01	0.41	0.121111	0.140485	1353	0.01	0.5	0.113614	0.118613	0.996532						9	13	36	23.5556	8.11035	1353	0
NPY1R_rs5578	673	11	666	12			0.83681	705	13	634	10			0.834096	679	12	660	11			1	1339	0.01	0.5	0.114488	0.119307	23	0.01	0.22	0.0656522	0.0604398						0.146974	1339	0	38	21.227	8.07703	23	5	35	19.913	8.48482
PARP1_rs3219149		0		1	684	677	0.497797		0		1	718	643	0.472834		0		1	691	670	0.492658						1	0.03	0.03	0.03		1361	0.01	0.5	0.113725	0.118733	0.406799						1	25	25	25		1361	0
PARP1_rs3219150		2		0	682	678	0.499642		2		0	716	644	0.50111		1		1	690	670	1						2	0.03	0.3	0.165	0.190919	1360	0.01	0.5	0.113588	0.118669	0.701328						2	32	35	33.5	2.12132	1360	0
PON1_rs3917596		8		6	676	672	0.789472		8		6	710	638	0.793793		6		8	685	663	0.60055						14	0.02	0.35	0.110714	0.110207	1348	0.01	0.5	0.113694	0.118834	0.663008						14	12	33	23.6429	6.68646	1348	0
PPARG_rs4135260		11		9	673	669	0.82253		10		10	708	634	0.825392		13		7	678	664	0.260674						20	0.01	0.43	0.147	0.140454	1342	0.01	0.5	0.113167	0.118348	0.310478						20	0	37	21.25	8.97291	1342	0
PPARG_rs4135277		0		1	684	677	0.497797		1		0	717	644	1		1		0	690	671	1						1	0.17	0.17	0.17		1361	0.01	0.5	0.113622	0.118745	0.374514						1	16	16	16		1361	0
PPARG_rs4135285	1	3	0	8	680	670	0.142776	1	5	0	6	712	638	0.876	1	6	0	5	684	666	1	1	0.15	0.15	0.15		11	0.02	0.3	0.113636	0.0911343	1350	0.01	0.5	0.113637	0.118975	0.616872	1	34	34	34		11	13	35	20.4545	6.2668	1350	0
PTGS2_rs20428	683	1	678	0			1	718	0	643	1			0.472834	690	1	671	0			1	1361	0.01	0.5	0.113681	0.118753	1	0.09	0.09	0.09							0.717755	1361	0	38	21.2065	8.08534	1	19	19	19
PTGS2_rs3918304	682	2	676	2			1	716	2	642	2			1	689	2	669	2			1	1358	0.01	0.5	0.113505	0.118724	4	0.03	0.31	0.1675	0.116154						0.256085	1358	0	38	21.1944	8.08789	4	20	31	24.75	5.61991
PTK2_rs4273891	674	10	673	5			0.299124	708	10	639	5			0.309913	682	9	665	6			0.605806	1347	0.01	0.5	0.113512	0.11898	15	0.03	0.39	0.127333	0.0935389						0.129472	1347	0	38	21.1856	8.06491	15	5	36	22.9333	9.70616
SDHD_rs693441		3		3	681	675	1		3		3	715	641	1		2		4	689	667	0.445606						6	0.03	0.39	0.156667	0.141798	1356	0.01	0.5	0.113473	0.118627	0.350121						6	13	30	21.6667	5.75036	1356	0
SOD2_rs5746088		13		8	671	670	0.379674		10		11	708	633	0.665518		10		11	681	660	0.828414						21	0.01	0.45	0.144286	0.138476	1341	0.01	0.5	0.113184	0.118372	0.32029						21	9	35	24.1429	8.53397	1341	0
TGFB1_rs4803454	1	2	0	2	681	676	1	0	2	1	2	716	641	0.803161	0	3	1	1	688	669	0.494227	1	0.09	0.09	0.09		4	0.01	0.08	0.045	0.0288675	1357	0.01	0.5	0.113884	0.118861	0.694665	1	35	35	35		4	15	32	21.5	7.85281	1357	0
TGFBR1_rs7041311	680	4	673	5			0.752106	712	6	641	3			0.51219	688	3	665	6			0.335461	1353	0.01	0.5	0.113829	0.119007	9	0.03	0.19	0.0888889	0.0573246						0.799606	1353	0	38	21.2151	8.10044	9	13	26	19.6667	4.69042
TGFBR2_rs6550008	683	1	671	7			0.0377721	715	3	639	5			0.487499	685	6	669	2			0.28804	1354	0.01	0.5	0.114099	0.118911	8	0.01	0.09	0.04	0.0261861						0.063391	1354	0	38	21.2253	8.07532	8	8	33	17.75	9.14565
TIMP2_rs8077028	682	2	673	5			0.285829	713	5	642	2			0.456771	687	4	668	3			1	1355	0.01	0.5	0.113683	0.118895	7	0.03	0.23	0.11	0.080829						0.707802	1355	0	38	21.2066	8.09901	7	16	26	20.8571	4.01782
TNF_rs3093668	675	9	664	14			0.301418	702	16	637	7			0.139414	675	16	664	7			0.0911983	1339	0.01	0.5	0.11416	0.118785	23	0.01	0.47	0.0847826	0.113051						0.290023	1339	0	38	21.2584	8.10233	23	8	36	18.087	6.20786
UCP3_rs826082		10		14	674	664	0.418374		9		15	709	629	0.151358		8		16	683	655	0.100499						24	0.01	0.31	0.0720833	0.0737787	1338	0.01	0.5	0.11441	0.119248	0.202138						24	4	36	21.9167	8.12894	1338	0
VDR_rs7979360	682	2	676	2			1	716	2	642	2			1	689	2	669	2			1	1358	0.01	0.5	0.113807	0.118844	4	0.03	0.11	0.065	0.0369685						0.925849	1358	0	38	21.201	8.09378	4	20	24	22.5	1.73205
[truncated: 196 more columns]
