# Supplementary material for: Multiple Superoxide Dismutase 1/Splicing Factor Serine Alanine 15 Variants Are Associated With the Development and Progression of Diabetic Nephropathy
Source: Oxford University Press journal article supplement (doi:10.2337/db07-1059), 2007-10-04
Supplement: db071059ola12.xls [file db071059ola12.xls]

## Sheet: lmaf_fcmacro_outcomes
	Persistent Microalbuminuria					Severe Nephropathy					>3-step progression					Severe retinopathy					Clinically significant macular edema
Locus	ProbChisq_cnsaer30	StdEst_cnsaer30	Riskratio_cnsaer30	RRLowerCL_cnsaer30	RRUpperCL_cnsaer30	ProbChisq_sevren3	StdEst_sevren3	Riskratio_sevren3	RRLowerCL_sevren3	RRUpperCL_sevren3	ProbChisq_any3step	StdEst_any3step	Riskratio_any3step	RRLowerCL_any3step	RRUpperCL_any3step	ProbChisq_anysvret	StdEst_anysvret	Riskratio_anysvret	RRLowerCL_anysvret	RRUpperCL_anysvret	ProbChisq_anycsme	StdEst_anycsme	Riskratio_anycsme	RRLowerCL_anycsme	RRUpperCL_anycsme
ABCA1_rs12684473	0.100611	0.0809328	2.81033	0.785978	6.95757	0.23602	0.0939363	3.18808	0.362081	11.6187	0.532338	-0.0228295	0.754443	0.252815	1.68829	0.608133	0.0366289	1.57134	0.179322	5.64809	0.0808036	0.0899577	3.03531	0.849041	7.51209
ADIPOQ_rs9877202	0.175146	0.0533998	3.8977	0.443906	14.0927	0.0957037	0.0673851	5.81112	0.660588	21.1255
ADPRTL2_rs3093927	0.600626	0.0350669	1.49296	0.417225	13.0618						0.849078	-0.00649	0.926797	0.465992	2.2451	0.74429	-0.0183568	0.806586	0.284932	3.85012	0.611084	0.0332962	1.47701	0.412788	12.9222
ADRB2_rs1800888	0.025467	-0.1082	0.432748	0.238981	0.891987	0.23268	-0.0814742	0.531353	0.231231	1.60848	0.694303	-0.0147361	0.89193	0.533265	1.65042	0.879985	0.00832134	1.06669	0.504866	2.83747	0.192055	-0.067572	0.591891	0.307367	1.34653
AGTR1_rs17230701	0.300511	-0.0388112	0.372189	0.102761	3.26994	0.140389	-0.0579139	0.220496	0.0601545	1.94522	0.0310478	-0.0675871	0.17129	0.0603503	0.818522	0.0147243	-0.0794892	0.125638	0.0438606	0.602797	0.000143044	-0.149864	0.0199947	0.006636	0.0981016
AGTR1_rs17231175	0.0844525	-0.0722493	0.158724	0.043642	1.3965						0.00840448	-0.0878864	0.100744	0.035476	0.481531						0.0223452	-0.103027	0.067843	0.0181033	0.603206
AGTR1_rs17231189	0.0393974	0.0913564	10.2507	1.16211	37.5525	0.00619733	0.13409	33.1749	3.68157	129.271	0.661278	0.0145949	1.46396	0.167505	5.22269	0.0579894	0.0796959	8.00853	0.910397	29.1099	0.0590297	0.0792172	7.91508	0.900185	28.7318
AGTR1_rs17231210	0.26203	0.050093	2.24351	0.469903	6.35508						0.218153	0.0390303	1.90668	0.637943	4.27893	0.886839	0.00719333	1.12625	0.12871	4.03179	0.0340783	0.0848009	4.06404	1.13488	10.0923
AGTR1_rs17236869	0.35032	-0.0543681	0.416028	0.115345	3.65004						0.687243	0.0148255	1.2778	0.454299	6.08178						0.225622	-0.0719921	0.304105	0.0834984	2.67718
APOB_rs17240611	0.153973	-0.114847	0.374805	0.0428458	1.34064	0.974163	0.00305595	1.02712	0.116979	3.71346	0.583963	-0.0189364	0.847198	0.430718	1.47653	0.697276	-0.02717	0.788333	0.165311	2.22713	0.532971	0.0355922	1.36571	0.455746	3.07985
APOB_rs17240910
APOB_rs17246814
APOC1_rs10408994	0.0146997	-0.0818358	0.0524851	0.0141551	0.464908	0.00276435	-0.108717	0.0180666	0.00450415	0.164405	0.0752499	-0.0517784	0.147844	0.0410249	1.29669	0.00708343	-0.0921942	0.0332914	0.00892732	0.295506	0.0107307	-0.085123	0.0431685	0.0116435	0.382393
APOC1_rs10424339	0.0390073	-0.0915893	0.0969769	0.0264957	0.85514	0.00485643	-0.13993	0.0258799	0.00661885	0.23347	0.471429	-0.0250101	0.520408	0.145646	4.55075	0.0162449	-0.110494	0.0558815	0.0150979	0.494723	0.0284949	-0.0968998	0.0796148	0.0217268	0.702341
APOC4_rs12721108	0.9956	0.000353715	1.00263	0.444897	3.00338	0.705542	-0.0330899	0.777704	0.272388	3.72587	0.792657	-0.00897743	0.934066	0.586188	1.61449	0.208396	-0.0715239	0.580871	0.289898	1.41336	0.163771	-0.0799156	0.544884	0.271785	1.32625
ATP1A1_rs1407717											0.844426	0.00647527	1.11301	0.312773	2.72922	0.877908	0.00778025	1.13723	0.129921	4.07513	0.756643	0.0160363	1.30364	0.148901	4.6742
ATPAF1_rs604264	0.37377	0.064903	1.91804	0.535841	16.7829						0.334851	-0.0306662	0.729498	0.41849	1.43505	0.446819	-0.0427003	0.644676	0.261015	2.30236	0.164678	-0.0720104	0.476819	0.211227	1.42964
C10orf110_rs10508207	0.669094	0.0312817	1.29728	0.459325	6.18569						0.54103	0.0232808	1.21355	0.678894	2.48032	0.98407	0.00152501	1.01275	0.358436	4.82994	0.7024	-0.0256147	0.808198	0.327265	2.88618
C20orf44_rs6120916	0.0634424	-0.0562072	0.132094	0.0362469	1.163	0.0246296	-0.0713517	0.0717747	0.0189204	0.640857	0.08304	-0.0500439	0.157621	0.0438536	1.38116
CASP3_rs4647620											0.00266337	-0.108507	0.0182071	0.00492403	0.161133	0.0219673	-0.0730324	0.0675233	0.0183075	0.597001
COL4A1_rs3742205											0.0961685	-0.04891	0.278791	0.0988285	1.32864	0.158582	-0.054623	0.240276	0.0666563	2.10754	0.272293	-0.0404747	0.347495	0.0963644	3.04844
COL4A1_rs666338	0.0146997	0.0818358	19.053	2.15096	70.6459	0.00276435	0.108717	55.3508	6.08254	222.018	0.0752499	0.0517784	6.76388	0.771196	24.3754	0.00708343	0.0921942	30.0377	3.38403	112.016	0.0107307	0.085123	23.165	2.61511	85.8849
COX5B_rs1800648											0.173996	0.0482474	1.6134	0.789914	2.88113	0.435684	0.0546725	1.71919	0.358828	4.90867	0.648005	0.030861	1.35794	0.28375	3.86734
COX5B_rs2071038	0.847741	0.0100179	1.17539	0.134265	4.21321						0.564674	0.0172575	1.33023	0.445631	2.97836	0.98958	0.000648421	1.01078	0.115551	3.61504	0.87712	0.007824	1.13811	0.130101	4.07107
EDNRA_rs9308220
FLT1_rs7981680	0.741005	-0.0200836	0.864143	0.409221	2.29797	0.673216	-0.0378916	0.754061	0.263426	3.61677	0.730914	0.0120758	1.09413	0.676679	1.92985	0.809599	0.0170658	1.13552	0.460127	4.05364	0.390859	-0.0528561	0.674513	0.319332	1.79399
HGF_rs2057935											0.35352	0.0364901	1.96272	0.551211	17.1425	0.499345	-0.0329761	0.543803	0.151725	4.76045	0.312494	-0.051874	0.383422	0.106666	3.35986
HGF_rs5745663											0.518233	-0.0227888	0.615019	0.0703983	2.19152
HGF_rs5745747											0.626784	0.0163145	1.53121	0.175146	5.46731	0.0440478	0.0864338	9.54871	1.08329	34.9128	0.0214206	0.103784	15.0343	1.7015	55.3432
HGF_rs5745777	0.565038	-0.0283758	0.599563	0.167005	5.25155						0.801163	-0.00887568	0.848724	0.30203	4.03792	0.311548	-0.038957	0.486921	0.172015	2.32402	0.011847	-0.0939161	0.176303	0.0711385	0.630702
HIF1A_rs1957756	0.240692	0.0552608	2.02493	0.565906	5.02087	0.452488	0.0525574	1.98932	0.226169	7.22847	0.176841	0.0489533	1.89767	0.715659	3.9872	0.10251	0.0785353	2.79372	0.780687	6.92806	0.125659	0.072902	2.59615	0.72536	6.44041
IGF1_rs5742623
IGF1_rs5742637	0.980653	0.0014512	1.02	0.28525	8.92177						0.156273	0.0559539	2.18695	0.779502	10.3974	0.848793	-0.0114658	0.851897	0.238271	7.4511	0.325122	-0.0498271	0.498164	0.176412	2.37516
INSR_rs10404318	0.71876	0.020703	1.22174	0.342161	3.01642	0.966372	0.0036382	1.03548	0.117985	3.73871	0.244253	0.0382909	1.44325	0.758278	2.46031	0.73187	-0.0219656	0.810265	0.169946	2.28796	0.789274	0.015383	1.15881	0.324542	2.86098
LARP5_rs2275677	0.415316	0.0442508	1.51243	0.504545	3.41279	0.377046	0.0648884	1.86218	0.38832	5.3281	0.548564	-0.0209286	0.818294	0.382446	1.50698	0.197668	0.0711309	1.97648	0.65869	4.46792	0.183415	0.0737808	2.0278	0.675023	4.59353
LDLR_rs17242739
LEPR_rs9436744	0.841929	0.0124378	1.11547	0.312515	2.75203	0.930482	-0.00831716	0.931565	0.106169	3.36144	0.315595	-0.038447	0.720584	0.337074	1.32524	0.914109	0.00687982	1.06037	0.297102	2.61566	0.194723	-0.1062	0.404475	0.0462476	1.44586
NDUFA10_rs3792084	0.517921	-0.0474897	0.680268	0.142698	1.92039	0.385009	0.0768812	1.84018	0.384115	5.2536	0.428613	-0.0298153	0.789377	0.4016	1.37435	0.181306	-0.117144	0.394982	0.045162	1.41192	0.959103	-0.00346524	0.972886	0.272558	2.40041
NFKB1_rs4648007
NFKB1_rs4648062											0.102064	0.0478788	3.49161	0.732961	9.84017
NFKB1_rs4648074	0.0773108	0.0526792	6.66708	0.757877	24.2364						0.43589	0.0193215	2.04077	0.233203	7.30744	0.293847	0.0271703	2.72571	0.310926	9.80957
NFKB1_rs4648143	0.0670967	-0.0960289	0.467397	0.243062	1.06237	0.597258	-0.0450288	0.699637	0.245153	3.3512	0.0783355	-0.0614275	0.614297	0.385441	1.06192	0.0270951	-0.11882	0.389766	0.202467	0.886534	0.681268	-0.0254332	0.817299	0.36271	2.44806
NFKB1_rs4648144	0.60865	-0.0285815	0.708804	0.250482	3.38263						0.43571	0.0281664	1.41573	0.632837	4.22415						0.804598	0.0159006	1.21684	0.339771	10.6493
NPY1R_rs5578	0.282444	0.0592179	1.58157	0.649963	3.16936	0.0943036	0.11851	2.5087	0.831271	5.73268	0.845146	0.00673264	1.05364	0.597446	1.70332	0.458827	0.0398126	1.3619	0.559775	2.7284	0.179123	0.0696646	1.71716	0.755563	3.30144
PARP1_rs3219149	0.00185051	-0.118032	0.0142527	0.00367588	0.128261											0.0182068	-0.0762149	0.0600407	0.0162564	0.531107	0.000210157	-0.1538	0.00341993	0.000735844	0.0326772
PARP1_rs3219150	0.0437061	-0.0887017	0.10438	0.0286798	0.918614						0.363742	-0.0324624	0.428374	0.119704	3.74795	0.0148199	-0.112698	0.0527577	0.0142348	0.46727	0.0323304	-0.0938308	0.0862584	0.0236122	0.760126
PON1_rs3917596	0.476419	-0.0422714	0.664364	0.269154	2.37193	0.18103	-0.0999976	0.37105	0.129881	1.77813	0.0516395	-0.0644377	0.527892	0.309542	1.00503	0.34551	-0.0558556	0.574891	0.232961	2.05224	0.0762546	-0.0985507	0.37641	0.166679	1.12883
PPARG_rs4135260	0.164717	-0.0748372	0.544912	0.270964	1.3288	0.0123586	-0.158545	0.267652	0.124181	0.720215	0.607316	-0.0173985	0.865331	0.526564	1.56129	0.477898	-0.0430305	0.699348	0.309658	2.09739	0.0153202	-0.117515	0.376451	0.202304	0.810828
PPARG_rs4135277	0.00355924	-0.106732	0.0214116	0.00552339	0.192581	0.0402643	-0.0627192	0.0987149	0.026802	0.872335	0.0143564	-0.0800582	0.0520445	0.0142745	0.45832	0.0889604	-0.0489298	0.164348	0.0453769	1.44394	0.180573	-0.0362916	0.261886	0.0724368	2.29943
PPARG_rs4135285	0.0920709	-0.078116	0.470205	0.247366	1.15815	0.941966	-0.0057635	0.946345	0.313147	7.58236	0.940259	0.00269116	1.02608	0.5662	2.23963	0.885145	-0.00773955	0.928644	0.408053	3.15971	0.762248	0.0178637	1.18641	0.473025	5.28443
PTGS2_rs20428											0.450839	0.0186185	1.98848	0.227372	7.10727
PTGS2_rs3918304											0.681909	-0.0134992	0.779219	0.163677	2.19289	0.810873	0.0109845	1.22497	0.139802	4.40243
PTK2_rs4273891	0.318006	-0.0772032	0.485874	0.0555315	1.73889	0.769432	0.0261924	1.28527	0.14636	4.64838	0.56392	-0.0201405	0.824497	0.385481	1.51757	0.561178	0.0344327	1.3907	0.389405	3.43482	0.593291	0.0315009	1.35234	0.378644	3.34042
SDHD_rs693441	0.666714	-0.0254232	0.687625	0.192308	6.01449						0.453969	-0.0249282	0.68632	0.306421	2.04915	0.377819	-0.0543688	0.440141	0.122563	3.85563	0.0656785	-0.0958817	0.235088	0.0827002	1.12419
SOD2_rs5746088	0.00639271	-0.141559	0.325894	0.174883	0.702591	0.47162	-0.0612719	0.608173	0.212786	2.91507	0.721419	0.0128532	1.10995	0.651018	2.11281	0.635343	-0.0288716	0.79117	0.350841	2.37081	0.0841278	-0.0950582	0.462314	0.230389	1.12591
TGFB1_rs4803454											0.567796	0.019937	1.29767	0.595068	4.27402						0.23113	-0.0611966	0.449412	0.185385	1.94082
TGFBR1_rs7041311	0.483538	0.0399686	1.61817	0.338789	4.5881						0.740772	0.0117652	1.15629	0.436715	2.42321	0.601436	0.028488	1.42118	0.297824	4.02096	0.920612	-0.00653375	0.922522	0.105371	3.30758
TGFBR2_rs6550008	0.812948	0.0121125	1.16724	0.244273	3.31272						0.859209	-0.00574211	0.92761	0.350296	1.94444	0.905695	-0.00569895	0.928159	0.194396	2.62941	0.0692654	0.076923	2.73642	0.910991	6.19799
TIMP2_rs8077028	0.380055	0.0450343	1.8486	0.387503	5.22684	0.474457	0.0465172	1.91657	0.218229	6.93377	0.863792	-0.00647554	0.91342	0.256776	2.23822	0.342127	0.0479482	1.95483	0.409873	5.52406	0.180593	0.0584649	2.26511	0.633516	5.60743
TNF_rs3093668	0.643595	-0.0269005	0.808108	0.269458	1.82508						0.50814	-0.0227858	0.837912	0.46448	1.37668	0.950097	0.00322292	1.02532	0.42115	2.0564	0.608953	-0.0302286	0.790881	0.2638	1.78509
UCP3_rs826082	0.0862556	-0.0934375	0.492777	0.25605	1.12064	0.223682	-0.0971354	0.477935	0.1909	1.71844	0.422557	-0.0289812	0.802301	0.496312	1.41487	0.161043	-0.08055	0.542265	0.270205	1.32069	0.0234605	-0.119092	0.404477	0.216989	0.872163
VDR_rs7979360
