# Supplementary material for: Multiple Superoxide Dismutase 1/Splicing Factor Serine Alanine 15 Variants Are Associated With the Development and Progression of Diabetic Nephropathy
Source: Oxford University Press journal article supplement (doi:10.2337/db07-1059), 2007-10-04
Supplement: db071059ola13.xls [file db071059ola13.xls]

## Sheet: taqman_marker_description
locus	gene_id	marker_id	new_rs	marker_id_link	Allele_1	Allele_2	_1_Freq	_2_Freq	_1_std	_2_std	_11_Freq	_12_Freq	_22_Freq	_11_std	_12_std	_22_std	NIndiv	NAllele	PIC	Het	Div	ChiSq	ProbChiSq	ProbExact	count_11	count_12	count_22	chromosome	chromosome_location
SFRS15_rs204732	SFRS15	rs204732		http://www.ncbi.nlm.nih.gov/SNP/snp_ref.cgi?rs=204732	C	T	0.845194	0.154806	0.0070309	0.0070309	0.718269	0.253852	0.0278797	0.00373066	0.00373066	0.00373066	1363	2	0.227443	0.253852	0.261682	1.22026	0.269309	0.2613	979	346	38	21	32014714
SOD1_rs9974610	SOD1	rs9974610		http://www.ncbi.nlm.nih.gov/SNP/snp_ref.cgi?rs=9974610	A	G	0.823855	0.176145	0.00735739	0.00735739	0.680207	0.287297	0.0324963	0.00400087	0.00400087	0.00400087	1354	2	0.248117	0.287297	0.290236	0.138809	0.709468	0.6978	921	389	44	21	31940240
SOD1_rs17878806	SOD1	rs17878806	rs9967983	http://www.ncbi.nlm.nih.gov/SNP/snp_ref.cgi?rs9967983	A	T	0.54467	0.45533	0.00971902	0.00971902	0.3003	0.488739	0.210961	0.00679616	0.00679616	0.00679616	1332	2	0.372997	0.488739	0.496009	0.286189	0.592673	0.6218	400	651	281	21	31959353
SOD1_rs17880135	SOD1	rs17880135		http://www.ncbi.nlm.nih.gov/SNP/snp_ref.cgi?rs=17880135	A	C	0.944568	0.0554324	0.00451652	0.00451652	0.895048	0.0990392	0.00591279	0.00191827	0.00191827	0.00191827	1353	2	0.0992362	0.0990392	0.104719	3.98064	0.046026	0.0553	1211	134	8	21	31963874
SOD1_rs17880753	SOD1	rs17880753	rs2234694	http://www.ncbi.nlm.nih.gov/SNP/snp_ref.cgi?rs2234694	G	T	0.0377566	0.962243	0.00357705	0.00357705		0.0755132	0.924487		0.000270114	0.000270114	1364	2	0.0700222	0.0755132	0.0726621	2.10005	0.147294	0.2641	0	103	1261	21	31960736
SOD1_rs17881180	SOD1	rs17881180		http://www.ncbi.nlm.nih.gov/SNP/snp_ref.cgi?rs=17881180	A	G	0.0524101	0.94759	0.0044718	0.0044718	0.00535578	0.0941086	0.900536	0.00186588	0.00186588	0.00186588	1307	2	0.0943937	0.0941086	0.0993266	3.60694	0.0575389	0.0845	7	123	1177	21	31954158
SOD1_rs17881203	SOD1	rs17881203		http://www.ncbi.nlm.nih.gov/SNP/snp_ref.cgi?rs=17881203	A	G	0.984226	0.015774	0.00242345	0.00242345	0.969186	0.0300807	0.000733676	0.000714355	0.000714355	0.000714355	1363	2	0.0305684	0.0300807	0.0310504	1.32937	0.248917	0.2903	1321	41	1	21	31964004
SOD1_rs202446	SOD1	rs202446		http://www.ncbi.nlm.nih.gov/SNP/snp_ref.cgi?rs=202446	A	C	0.143235	0.856765	0.00680721	0.00680721	0.0204082	0.245654	0.733938	0.00336772	0.00336772	0.00336772	1323	2	0.215318	0.245654	0.245438	0.001027	0.974435	1	27	325	971	21	31950512
