# Supplementary material for: Multiple Superoxide Dismutase 1/Splicing Factor Serine Alanine 15 Variants Are Associated With the Development and Progression of Diabetic Nephropathy
Source: Oxford University Press journal article supplement (doi:10.2337/db07-1059), 2007-10-04
Supplement: db071059ola15.xls [file db071059ola15.xls]

## Sheet: taqman_outcomes
univariate or multivariate	Univariate Cox PH model																																			Mulitvariate Cox PH model
outcome	Persistent Microalbuminuria							Severe Nephropathy							>3-step progression							Severe retinopathy							Clinically significant macular edema							Persistent Microalbuminuria												Severe Nephropathy
Locus	Estimate_uv_cnsaer30	StdErr_uv_cnsaer30	ChiSq_uv_cnsaer30	ProbChiSq_uv_cnsaer30	HazardRatio_uv_cnsaer30	HRLowerCL_uv_cnsaer30	HRUpperCL_uv_cnsaer30	Estimate_uv_sevren3	StdErr_uv_sevren3	ChiSq_uv_sevren3	ProbChiSq_uv_sevren3	HazardRatio_uv_sevren3	HRLowerCL_uv_sevren3	HRUpperCL_uv_sevren3	Estimate_uv_any3step	StdErr_uv_any3step	ChiSq_uv_any3step	ProbChiSq_uv_any3step	HazardRatio_uv_any3step	HRLowerCL_uv_any3step	HRUpperCL_uv_any3step	Estimate_uv_anysvret	StdErr_uv_anysvret	ChiSq_uv_anysvret	ProbChiSq_uv_anysvret	HazardRatio_uv_anysvret	HRLowerCL_uv_anysvret	HRUpperCL_uv_anysvret	Estimate_uv_anycsme	StdErr_uv_anycsme	ChiSq_uv_anycsme	ProbChiSq_uv_anycsme	HazardRatio_uv_anycsme	HRLowerCL_uv_anycsme	HRUpperCL_uv_anycsme	size_cnsaer30	Lcov_mv_cnsaer30	Lcov_gene_mv_cnsaer30	LRT_mv_cnsaer30	pvalue_mv_cnsaer30	Estimate_mv_cnsaer30	StdErr_mv_cnsaer30	ChiSq_mv_cnsaer30	ProbChiSq_mv_cnsaer30	HazardRatio_mv_cnsaer30	HRLowerCL_mv_cnsaer30	HRUpperCL_mv_cnsaer30	size_sevren3	Lcov_mv_sevren3
SFRS15_rs204732	-0.445282	0.111635	15.9099	6.64293e-05	0.640644	0.514745	0.797334	-0.370784	0.160024	5.36874	0.0205008	0.690193	0.50438	0.944459	-0.0447837	0.0690516	0.420621	0.516627	0.956204	0.835168	1.09478	-0.225769	0.116245	3.77209	0.0521144	0.797903	0.635334	1.00207	-0.0540317	0.121245	0.198597	0.655856	0.947402	0.747017	1.20154	1297	1803.9	1788.67	15.2281	9.52771e-05	-0.468398	0.115374	16.4823	4.91076e-05	0.626004	0.499311	0.784844	1363	754.775
SOD1_rs9974610	-0.425525	0.110309	14.8809	0.000114516	0.653427	0.526383	0.811133	-0.252361	0.16318	2.39173	0.121978	0.776964	0.56429	1.06979	-0.021226	0.0672503	0.0996203	0.752286	0.978998	0.8581	1.11693	-0.0179749	0.118383	0.0230544	0.879316	0.982186	0.7788	1.23869	-0.0411418	0.117647	0.122294	0.72656	0.959693	0.762063	1.20857	1288	1794.84	1779.45	15.3908	8.74144e-05	-0.45858	0.112999	16.4696	4.94357e-05	0.63218	0.50659	0.788907	1354	746.166
SOD1_rs17878806	0.0143772	0.0935525	0.0236178	0.877861	1.01448	0.844524	1.21864	0.0887357	0.134525	0.4351	0.509497	1.09279	0.839517	1.42248	-0.0126532	0.0521627	0.0588409	0.808337	0.987427	0.891464	1.09372	-0.00723789	0.0930483	0.00605072	0.937998	0.992788	0.827282	1.19141	-0.0879681	0.0907588	0.939448	0.33242	0.91579	0.766553	1.09408	1267	1746.54	1746.04	0.503194	0.4781	0.0692445	0.097687	0.502455	0.478424	1.0717	0.884955	1.29785	1332	730.449
SOD1_rs17880135	-0.43662	0.172372	6.41618	0.0113085	0.646217	0.460952	0.905944	-0.690962	0.208384	10.9946	0.000913772	0.501094	0.333075	0.753869	-0.0272311	0.108883	0.0625479	0.802513	0.973136	0.786127	1.20463	-0.13507	0.187305	0.520019	0.470834	0.873655	0.605209	1.26117	-0.0775455	0.184749	0.176177	0.67468	0.925385	0.644264	1.32917	1287	1788.84	1779.88	8.9613	0.00275759	-0.580376	0.180098	10.3849	0.0012705	0.559688	0.39323	0.796609	1353	747.177
SOD1_rs17880753	0.301062	0.219587	1.87975	0.170362	1.35129	0.878693	2.07808	-0.231056	0.394147	0.343652	0.557728	0.793695	0.366568	1.71851	-0.135491	0.144605	0.877917	0.348773	0.873287	0.657763	1.15943	-0.304505	0.263886	1.33154	0.248531	0.737489	0.439678	1.23702	0.0383778	0.237218	0.0261737	0.871477	1.03912	0.65275	1.6542	1298	1812.68	1811.92	0.760068	0.383307	0.201946	0.226418	0.795522	0.372436	1.22378	0.785195	1.90735	1364	754.909
SOD1_rs17881180	0.547351	0.172124	10.1123	0.00147282	1.72867	1.23367	2.42227	0.813939	0.203716	15.9636	6.45706e-05	2.25678	1.51386	3.36429	0.105297	0.110907	0.901388	0.34241	1.11104	0.893975	1.38081	0.183445	0.18943	0.93781	0.332842	1.20135	0.828755	1.74145	0.0124545	0.197436	0.00397926	0.949702	1.01253	0.687624	1.49096	1245	1714.84	1702.05	12.7877	0.000348914	0.713205	0.183045	15.1815	9.76564e-05	2.04052	1.42539	2.92112	1307	714.883
SOD1_rs17881203	-0.291146	0.329048	0.782893	0.376258	0.747407	0.392166	1.42444	-0.623021	0.371876	2.80678	0.0938665	0.536322	0.258752	1.11165	-0.351634	0.193609	3.2986	0.069339	0.703538	0.481379	1.02822	-0.368513	0.315882	1.36099	0.243366	0.691762	0.372458	1.2848	-0.357076	0.302097	1.3971	0.23721	0.699719	0.38706	1.26494	1298	1812.09	1810.6	1.48837	0.222469	-0.44474	0.341364	1.69737	0.192632	0.640991	0.328309	1.25147	1363	754.724
SOD1_rs202446	0.461638	0.116618	15.67	7.54111e-05	1.58667	1.26247	1.99413	0.447251	0.166429	7.22176	0.0072025	1.56401	1.12869	2.16722	0.00549876	0.0747399	0.00541283	0.941351	1.00551	0.868499	1.16414	0.109779	0.128324	0.731849	0.392285	1.11603	0.867854	1.43518	0.00369307	0.131866	0.000784346	0.977657	1.0037	0.775102	1.29972	1260	1773.11	1757.36	15.749	7.23244e-05	0.500612	0.120877	17.1521	3.45021e-05	1.64973	1.30174	2.09076	1323	732.374
[truncated: 46 more columns]
