# Supplementary material for: Multiple Superoxide Dismutase 1/Splicing Factor Serine Alanine 15 Variants Are Associated With the Development and Progression of Diabetic Nephropathy
Source: Oxford University Press journal article supplement (doi:10.2337/db07-1059), 2007-10-04
Supplement: db071059ola16.xls [file db071059ola16.xls]

## Sheet: modelselection
Outcome: Persistent Microalbuminuria (n=1156 in the Full Model and Model Selection)			Single Marker Analyse				Single Marker Analyse(complete data)				M1:Full Model with all the Markers				M2:Backward Selection on 11 Main effects				M3:Forward Selection on 11 Main effects				M2.1: Backward selection on 55 Two-way interaction for the model with 11 SOD1 SNPs +55 Two-way interaction+17 Covariates				M3.1:Forward selection on 55 Two-way interaction for the model with 11 SOD1 SNPs +55 Two-way interaction+17 Covariates				M2.2: Backward selection of main effects that don' t appear in interaction terms for the model with 11 SOD1 SNPs +5 Two-way interaction+17 Covariates (Based on Backward results X--AA)				M3.2: Backward selection of main effects that don' t appear in interaction terms for the model with 11 SOD1 SNPs +3 Two-way interaction+17 Covariates (Based on Forward results AB--AE)
main effects	illumina/Taqman	SampleSize	ProbChiSq	HazardRatio	HRLowerCL	HRUpperCL	ProbChiSq	HazardRatio	HRLowerCL	HRUpperCL	ProbChiSq	HazardRatio	HRLowerCL	HRUpperCL	ProbChiSq	HazardRatio	HRLowerCL	HRUpperCL	ProbChiSq	HazardRatio	HRLowerCL	HRUpperCL	ProbChiSq	HazardRatio	HRLowerCL	HRUpperCL	ProbChiSq	HazardRatio	HRLowerCL	HRUpperCL	ProbChiSq	HazardRatio	HRLowerCL	HRUpperCL	ProbChiSq	HazardRatio	HRLowerCL	HRUpperCL
SOD1_rs17880135	Both	1301	0.000712233	1.81349	1.28477	2.55981	0.00186819	1.87907	1.26277	2.79615	0.333056	0.434636	0.080427	2.34882									0.00729912	2818.04	8.50366	933875	0.200918	12.9521	0.255676	656.132	0.00185862	4167.74	21.8783	793941	0.0259111	54.5769	1.61679	1842.31
SOD1_rs17880196	I	1296	0.194015	1.13922	0.935801	1.38685	0.367918	1.10028	0.893632	1.35471	0.642041	0.889104	0.541649	1.45944									0.0123615	0.252604	0.0859551	0.74235	0.00581215	0.225452	0.0782233	0.649788	0.0155374	0.301505	0.114158	0.796314	0.00472748	0.249753	0.0953927	0.653895
SOD1_rs17880753	T	1298	0.372436	1.22378	0.785195	1.90735	0.21847	1.33827	0.841395	2.12856	0.224457	2.87305	0.523393	15.7709									0.00014882	1562.02	34.9479	69815.8	0.01314	45.1385	2.2229	916.591	0.000177412	1386.23	31.5773	60854.9	0.00949795	53.3989	2.64268	1079
SOD1_rs17880998	I	1296	0.33868	0.869767	0.653537	1.15754	0.28797	0.850194	0.630249	1.14689	0.353339	0.751443	0.410981	1.37395									0.398753	0.669995	0.264301	1.69842	0.360496	0.753306	0.410461	1.38252	0.506949	0.75924	0.336568	1.71271
SOD1_rs17881180	T	1245	9.76564e-05	2.04052	1.42539	2.92112	0.000543808	2.00953	1.35305	2.98453	0.185278	3.10465	0.58082	16.5952									0.209548	2.98698	0.540675	16.5017	0.190349	3.13628	0.566818	17.3535
SOD1_rs17881203	T	1298	0.192632	0.640991	0.328309	1.25147	0.0521537	0.498127	0.246524	1.00652	0.761356	0.880225	0.386388	2.00523									0.891255	1.06924	0.409488	2.79197	0.872648	1.08142	0.415274	2.81615	0.992849	1.00439	0.385682	2.6156	0.987722	1.00751	0.388593	2.61217
SOD1_rs17884536	I	1295	0.545729	0.869887	0.553449	1.36725	0.348996	0.797526	0.496728	1.28047	0.341739	2.37311	0.399569	14.0943									0.496686	0.565483	0.109274	2.92632	0.404989	0.422046	0.0554115	3.21455					0.281717	0.342178	0.0485567	2.41132
SOD1_rs17878806	T	1267	0.478424	1.0717	0.884955	1.29785	0.823364	1.02303	0.83764	1.24946	0.906024	1.0288	0.642129	1.64831									0.709734	1.09717	0.673297	1.78788	0.893222	1.03307	0.642421	1.66126
SOD1_rs202446	T	1260	3.45021e-05	1.64973	1.30174	2.09076	0.000132247	1.65095	1.27669	2.13492	0.472992	1.29267	0.641202	2.60602					0.000132247	1.65095	1.27669	2.13492	0.135571	0.380023	0.106662	1.35398	0.48055	1.29086	0.635046	2.62395	0.245193	0.49775	0.153462	1.61444
SFRS15_rs204732	T	1297	4.91076e-05	0.626004	0.499311	0.784844	0.000163764	0.617568	0.480664	0.793464	0.294391	0.737263	0.41704	1.30337	0.000163764	0.617568	0.480664	0.793464					0.223664	0.698485	0.39187	1.24501	0.272274	0.724624	0.407731	1.28781
SOD1_rs9974610	T	1288	4.94357e-05	0.63218	0.50659	0.788907	0.00238623	0.689913	0.542965	0.87663	0.819999	1.06051	0.639373	1.75903									0.394266	0.310272	0.021009	4.58226	0.016401	0.133535	0.0257913	0.691383	0.348175	0.277924	0.01915	4.03351	0.00489015	0.1011	0.0204927	0.498771
interactions
rs17880135_rs17880753																							0.00177025	7234.58	27.5318	1.90104e+06	0.0546728	32.7268	0.932501	1148.57	0.00216242	3738.69	19.4783	717607	0.0403034	40.1801	1.17738	1371.22
rs17880196_rs17880753																							0.0147084	0.286807	0.105148	0.782314					0.022229	0.314806	0.116885	0.847867
rs17880196_rs17884536																											0.00451009	4.16788	1.55635	11.1615					0.00496263	4.1134	1.53361	11.0328
rs17880753_rs9974610																							0.0415937	10.5636	1.09393	102.008					0.0492383	9.58828	1.00757	91.2445
rs17880998_rs202446																							0.0271277	4.56173	1.1871	17.5296					0.025516	4.5205	1.20293	16.9876
rs17880998_rs9974610																							0.00410602	5.75549	1.74178	19.0183					0.00491706	5.33247	1.66087	17.1208
rs17881203_rs9974610																							0.00941014	8.84952	1.70693	45.8799	0.0100774	8.45305	1.66308	42.965	0.00829434	9.05041	1.76354	46.4462	0.0122381	7.78836	1.56321	38.8039
-2Log L											1573.3				1582.62				1582.25				1545.44				1557.06				1548.84				1564.41
AIC											1629.3				1618.62				1618.25				1613.44				1619.06				1608.84				1616.41
Degrees of freedom											28				18				18				34				31				30				26
LRT:		d.f.	P-value
	M2 vs. M2.1	18	0.00495875
	M2 vs. M3.1	13	0.0194359
	M3 vs. M2.1	18	0.00222793
	M3 vs. M3.1	13	0.0217651
	M2.1 vs. M2.2	4	0.492314
	M3.1 vs. M3.2	5	0.19575
Outcome: Severe Nephropathy (n=1214 in the Full Model and Model Selection)			Single Marker Analyse				Single Marker Analyse(complete data)				M1: Full Model with all the Markers				M2:Backward Selection on 11 Main effects				M3:Forward Selection on 11 Main effects				M2.1: Backward selection on 55 Two-way interaction for the model with 11 SOD1 SNPs +55 Two-way interaction+17 Covariates				M3.1: Forward selection on 55 Two-way interaction for the model with 11 SOD1 SNPs +55 Two-way interaction+17 Covariates				M2.2: Backward selection of main effects that don' t appear in interaction terms for the model with 11 SOD1 SNPs +2 Two-way interaction+17 Covariates (Based on Backward results X--AA)				M3.2: Backward selection of main effects that don' t appear in interaction terms for the model with 11 SOD1 SNPs +1 Two-way interaction+17 Covariates (Based on Forward results AB--AE)
main effects	illumina/Taqman	SampleSize	ProbChiSq	HazardRatio	HRLowerCL	HRUpperCL	ProbChiSq	HazardRatio	HRLowerCL	HRUpperCL	ProbChiSq	HazardRatio	HRLowerCL	HRUpperCL	ProbChiSq	HazardRatio	HRLowerCL	HRUpperCL	ProbChiSq	HazardRatio	HRLowerCL	HRUpperCL	ProbChiSq	HazardRatio	HRLowerCL	HRUpperCL	ProbChiSq	HazardRatio	HRLowerCL	HRUpperCL	ProbChiSq	HazardRatio	HRLowerCL	HRUpperCL	ProbChiSq	HazardRatio	HRLowerCL	HRUpperCL
SOD1_rs17880135	Both	1367	5.26257e-05	2.62832	1.64535	4.19852	0.000181	2.77976	1.62773	4.74715	0.562499	0.399632	0.017929	8.90765									0.513616	0.28084	0.00621693	12.6866	0.510859	0.362341	0.0175744	7.47062
SOD1_rs17880196	I	1362	0.233935	1.20496	0.886423	1.63796	0.439729	1.13872	0.819046	1.58315	0.697609	1.15997	0.548735	2.45205									0.737218	1.18247	0.444231	3.14753	0.826218	1.08734	0.514894	2.29624	0.787089	1.11311	0.511493	2.42233
SOD1_rs17880753	T	1364	0.486721	0.749542	0.332644	1.68893	0.183212	0.523843	0.202157	1.35742	0.36702	3.76906	0.210974	67.3343									0.364351	3.82213	0.210925	69.2601	0.379313	3.54214	0.211232	59.398
SOD1_rs17880998	I	1362	0.745507	0.925342	0.579178	1.4784	0.629461	1.13587	0.676967	1.90587	0.748173	0.85873	0.33889	2.17597									0.69509	0.830139	0.327242	2.10588	0.207679	2.98952	0.54422	16.4221					0.199401	2.82937	0.577843	13.8538
SOD1_rs17881180	T	1307	5.82259e-06	3.03002	1.87615	4.89356	7.14098e-05	2.95363	1.73075	5.04056	0.230899	6.57838	0.301789	143.395	7.14098e-05	2.95363	1.73075	5.04056	7.14098e-05	2.95363	1.73075	5.04056	0.242082	9.5489	0.217806	418.636	0.211836	6.79659	0.335544	137.668	0.0036293	2.82674	1.40345	5.69342	0.0085664	2.46563	1.25813	4.83201
SOD1_rs17881203	T	1363	0.0397919	0.420593	0.184195	0.96039	0.0092964	0.307308	0.126308	0.747679	0.861098	0.900678	0.279055	2.90703									0.816162	0.869049	0.266168	2.83748	0.917426	0.939892	0.291158	3.03409
SOD1_rs17884536	I	1361	0.335237	1.5	0.657548	3.42182	0.104864	2.23312	0.845719	5.89655	0.153705	8.74779	0.444447	172.178									0.153607	8.84414	0.442948	176.587	0.113457	10.553	0.570395	195.245					0.0463952	3.17859	1.01864	9.91852
SOD1_rs17878806	T	1332	0.336531	1.15205	0.863187	1.53759	0.282934	1.18546	0.868999	1.61715	0.865189	0.941149	0.467258	1.89566									0.910001	0.960368	0.476343	1.93622	0.984249	0.992975	0.493161	1.99935
SOD1_rs202446	T	1323	0.00570221	1.65074	1.15703	2.35511	0.00999694	1.651	1.12738	2.41784	0.051894	2.92028	0.991245	8.60335									0.661422	1.34388	0.358023	5.04438	0.675353	0.663153	0.097006	4.53344	0.754708	0.828211	0.25388	2.7018	0.105283	0.253454	0.0481502	1.33414
SFRS15_rs204732	T	1363	0.0572375	0.717809	0.510023	1.01025	0.0606799	0.699909	0.482095	1.01613	0.601268	1.28828	0.498204	3.3313									0.474854	0.700143	0.263376	1.86122	0.634464	1.2606	0.485256	3.27478	0.702574	0.824938	0.307204	2.21522
SOD1_rs9974610	T	1354	0.156732	0.780761	0.554323	1.0997	0.156063	0.766533	0.530857	1.10684	0.100775	2.29162	0.851192	6.16959									0.158914	2.01509	0.760206	5.34141	0.0974707	2.30144	0.858766	6.1677	0.0176713	4.8267	1.3148	17.7191
interactions
rs17880196_rs202446																							0.035972	3.95217	1.09413	14.2759
rs17880196_rs204732																							0.0207142	3.89414	1.23069	12.3218
rs17880998_rs202446																											0.056492	5.15883	0.955641	27.8488	0.00970408	4.65172	1.45097	14.9131	0.0562802	5.20164	0.956813	28.2783
-2Log L											636.045				644.611				644.611				631.195				631.418				637.384				636.819
AIC											692.045				680.611				680.611				691.195				689.418				683.384				680.819
Degrees of freedom											28				18				18				30				29				23				22
LRT:		d.f.	P-value
	M2 vs. M2.1	12	0.339543
	M2 vs. M3.1	11	0.280898
	M2 vs. M2.2	5	0.204298
	M2 vs. M3.2	4	0.0995016
	M2.1 vs. M2.2	7	0.517863
	M3.1 vs. M3.2	7	0.61115

## Sheet: Global
outcome	variable	Criterion	Lcov	Lcov_gene	LRT	df	pvalue
cnsaer30		-2 LOG L	1595.74	1573.3	22.4395	11	0.0211809
sevren3		-2 LOG L	658.021	636.045	21.9763	11	0.0245579
ey10_any3step		-2 LOG L	4569.62	4556.38	13.2407	11	0.277884
ey10_anysvret		-2 LOG L	1503.71	1480.56	23.1527	11	0.0168187
ey10_anycsme		-2 LOG L	1725.37	1719.98	5.38545	11	0.911074
