# Supplementary material for: Multiple Superoxide Dismutase 1/Splicing Factor Serine Alanine 15 Variants Are Associated With the Development and Progression of Diabetic Nephropathy
Source: Oxford University Press journal article supplement (doi:10.2337/db07-1059), 2007-10-04
Supplement: db071059ola17.xls [file db071059ola17.xls]

## Sheet: Sheet1
OLA Table 17. Sequences of primers and probes used for SNP genotyping on Taqman platform
SNP	Primer	Probe	ABI Assay #
rs17880135	Forward 5'-GGAGAGGAAAAGCTAAATTGGAAGACA-3'	VIC CACTTACTGTGAACCTACTGT	C__61101393_10
	Reverse 5'-GCAACAAACTACATTAGGGAAATGTGT-3'	FAM-CTTACTGTGAACATACTGT
rs17881180	Forward 5'-GCCGCCCTGGTCCAG-3'	VIC- ACCGGGCGGCACG	C__61101320_10
	Reverse 5'-CCCGGTGACTCAGCACTTG-3’	FAM- ACCGGGCAGCACG
rs202446	forward 5’-GTGGTTAAAAGGTGGGCAAA-3’		C___3272738_10
	reverse 6-FAM 5’-TGAGGTTGGAGAATTGCCTAA-3’
rs9974610	Forward 5’- CTTCCAAAGTGCTGGGAGTACAG	VIC-CGGCCTGTGTATCT	NA
	Reverse 5’- GAGGGAAACTCAGTTGGAAACTTCT	FAM-CGGCCTGTATATCT
rs17878806	Forward 5'-AAACTGAAGATGGAATGCAGAGGAT	VIC-AATATGCTTAAAAAAATTTTT	NA
	Reverse 5'-CAGTTTCTCTGAACCTACTCTGGTT	FAM-ATGCTTAAAAAAAATTTT
rs17880753	Forward 5'-GGATGAAGAGAGGTAACAAGATGCT	VIC-TCCAGAAAGCTATCGCCAT	NA
	Reverse 5'-GGGAAACACGGAATTATCTTAGCACATATTTA	FAM-CAGAAAGCTAGCGCCAT
rs17881203	Forward 5'-CCTAATGTAGTTTGTTGCCTATGTGGAA	VIC-TTTCAAAAGGCGTAAGTG	C__61101394_10
	Reverse 5'-CCTATATGCACATGTAAAAACTGGTAGTGT	FAM-TTCAAAAGGCATAAGTG
rs204732	Forward-5’-TTTGAAGAGCCCATCTGAGTCTAGTC	VIC-AGTTTTTGAGTAGTGAGTCC	NA
	Reverse-5’-GACGTATAAAAGCTGTTCACTGAGTCTTC	6FAM-AAGTTTTTGAGCAGTGAGT
