# Supplementary material for: Multiple Superoxide Dismutase 1/Splicing Factor Serine Alanine 15 Variants Are Associated With the Development and Progression of Diabetic Nephropathy
Source: Oxford University Press journal article supplement (doi:10.2337/db07-1059), 2007-10-04
Supplement: db071059ola18.xls [file db071059ola18.xls]

## Sheet: SOD1_SFRS15_sequencing_primers
Forward primer	Reverse primer	Annealing temperature
SOD1
SOD1-2000 5’-TAGCTACTCTGGTGGGGAGGT-3’	SOD1-2000 5’-GCATCTGAAGTGCCTGAAGAA-3’	60 oC
SOD1-2700 5’-CAAGAACGTTGAATAGGCTGTG-3’	SOD1-2700 5’-GCTTAGGCAATTCTCCAACCT-3’	60 oC
SOD1-2420 5’-GATAACCATTGAGGGTTTCTTATGAC-3’	SOD1-2420 5’-ATGAAATCCTGTCTCAACAATAATCA-3’	60 oC
SOD1-2578-1 5’-ATATACCTTCATAAAGACCTGGAAGG-3’	SOD1-2578-1 5’-GTAGGATGTTCAGTAGAATCCCTAGC-3’	59 oC
SOD1-2578-2 5’-ATTTAAGGCATCTATTCCTCCTCAC-3’	SOD1-2578-2 5’-GACTGTCCCTTGTTGAGTACACTG-3’	59 oC
SOD14010 5’-GTGACAGAGTGAGACTCCATATCAA-3’	SOD1-4010 5’-TGAAACAACAATAGAAGCTATTCCA-3’	59 oC
SOD1-5250 5’-CCCTTGGCAAGTTTACAATGA-3’	SOD1-5250 5’-GATGCCTCCATACAACAGGAA-3’	62 oC
SOD1-6100 5’-CCGGACAAAAGTAGTTTGCAC-3’	SOD1-6100 5’-ACGCTGCAGGAGACTACGAC-3’	60 oC
SOD1-6800 5’-CGGAGGTCTGGCCTATAAAGT-3’	SOD1-6800 5’-CAAACGGTCTCTGTTGCGTAT-3’	60 oC
SOD1-1 5’-GTCTTCGCTTTTGTACAGCTCTAAG-3’	SOD1-1 5’-ACACAGACTAACTGTTCCTGTCCTC-3’	59 oC
SOD1-2 5’-CAGAACCTTAGTGAAGTTACCAACTG-3’	SOD1-2 5’-CAATGTATTATCTCTGCATATCTGGAA-3’	59 oC
SOD1-3 5’-AGCTTGCATAGTTCCTTCTTTTAAGC-3’	SOD1-3 5’-AGGTAATGGTGACAGGTAATGGTG-3’	59 oC
SOD1-4 5’-GAGACACTGACATGTTGTATGACG-3’	SOD1-4 5’-CCTTTTTAACCCAAAAGGTGTATG-3’	59 oC
SOD1-5 5’-TATGATGGACACTTAAAAACACTCACT-3’	SOD1-5 5’-GCTGTATTATCTCCAAACTCATGAAC-3’	59 oC
SOD1-6 5’-TTTCTTAAAGGAAAGTAATGGACCAG-3’	SOD1-6 5’-TTCTACAATGATGCTGTAAGACAAAAC-3’	59 oC
SOD1-7 5’-TTGTCTTAAGATTTGGTGTAGTGTGTC-3’	SOD1-7 5’-CTCATAAACTTCTGTTAACTTGCTTCC-3’	59 oC
SOD1-8 5’-CAAAGTATGATACAAACTGAAGATGGA-3’	SOD1-8 5’-GACACTTGTAAAGTTAACACCCTTCTC-3’	59 oC
SOD1-9 5’-AGTAAAGGGCACAGATAGAACTGC-3’	SOD1-9 5’-GCTATCGCCATTATTACAAGAGTTAAG-3’	61 oC
SOD1-10 5’-CTTCTTATAAATAGGCTGT-ACCAGTGC-3’	SOD1-10 5’-ATAATGAAAAAGCATCAGATGGATTAG-3’	63 oC
SOD1-11 5’-TACTTGTTTGCAAATTTGTGTCTACTC-3’	SOD1-11 5’-CCCACAAGTTAAACAAGTCATGATAA-3’	65 oC
SOD1-12 5’-AGTTTTAAAATGGCCAGATTTTCTT-3’	SOD1-12 5’-ATAACTTTGGGCTGTCAAGTAATCA-3’	63 oC
SOD1-13 5’-CCTAATGTTTAAAGGTAATGTCTTTGC-3’	SOD1-13 5’-CCTATTTGTCTAAGCAGAGTTGTGTT-3’	60 oC
SOD1—733 5’-ACAGCTTCAGTGGAACAGATTTAGT-3’	SOD1—733- 5’-TCCACATAGGCAACAAACTACATTA-3’	60 oC
SOD1-88 5’-AGGAGAGATCATTTAGGAGAGGAAA-3’	SOD1-88- 5’-TGCTTAAAGTTGGTGGGTTAAATAG-3’	61 oC
SOD1+504 5’-TTAACTGCTCAGCATACTGAAACC-3’	SOD1+504 5’-CATTAAGGTGGAAAAGGATTGTTC-3’	60 oC
SOD1+1145 5’-ACCTTATGACTGAGCACTAAAAATCA-3’	SOD1+1145 5’-AGAGAGTCTCGTAGAGAGAAGGAAGA-3’	60 oC
SOD1+1827 5’-GTTCTGAAGCAGTGTCTACATTTCC-3’	SOD1+1827- 5’-AGGCACCATCTACTGGTCTTCTT-3’	60 oC
SOD1-2433 5’-CTTTCATTCCATGAGGTGGAG-3’	SOD1-2433 5’-CTTCACATTTGTGTATGGATCTTTG-3’	60 oC
SOD1-3147 5’-GAAGATCTCTTTGACTCCATGCTAC-3’	SOD1-3147 5’-AAATATTTCCCAAATGATGTGAAGA-3’	60 oC
SFRS15
SFRS15-Fex-5’-AAGTTAGAGGAACAGGCACAGACTT-3’	SFRS15-Fex-5’-ACCAAACGGACATGTTGAAGAC-3’	61 oC
SFRS15-1 5’- CCACCTCTCCGCCTCTG -3’	SFRS15-1 5’- TTTCAATTTTGAACACTCCATTTTT-3’	62 oC
SFRS15-2 5’-TGGAACTGATAAAGATGTTTTTGG-3’	SFRS15-2 5’-GGTATCCTCTTTCTTTGATTCTTCC-3’	60 oC
SFRS15-3 5’-ACTCCTACACAACCATCTGAACAA-3’	SFRS15-3 5’-GATGCTGACCTAGATCTTGACTTTC-3’	60 oC
SFRS15-4 5’-CAGCCTTTCCAAGCTTCTTTT-3’	SFRS15-4 5’-CTGCTTATAATCTGCCTTTATTCCTT-3’	60 oC
SFRS15-5 5’-GGTTGTGCCTATATTGTTATGGTTC-3’	SFRS15-5 5’-GGATACTGGTGGAGTTATAGGAGGT-3’	60 oC
SFRS15-6 5’-AGGCTTTGGTCCTGGTGTTC-3’	SFRS15-6 5’-AAGGGACCTTTCATTCCATGAG-3’	58 oC
SFRS15-7 5’-CTTACAGCGGTTCCCTTTGAT-3’	SFRS15-7 5’-GCTTCTTCCTTCTCTCTACGAGACT-3’	60 oC
SFRS15-8 5’-CCAAGAAAGGTTTGGAAGAAGAT-3’	SFRS15-8- 5’-TTTTAAATAGAAGGGAAGCAATCAA-3’	58oC
SFRS15-9 5’-CTTACAGCGGTTCCCTTTGAT-3’	SFRS15-9- 5’-GCTTCTTCCTTCTCTCTACGAGACT-3’
