# Supplementary material for: Multiple Superoxide Dismutase 1/Splicing Factor Serine Alanine 15 Variants Are Associated With the Development and Progression of Diabetic Nephropathy
Source: Oxford University Press journal article supplement (doi:10.2337/db07-1059), 2007-10-04
Supplement: db071059ola20.xls [file db071059ola20.xls]

## Sheet: freqs
			SOD1 rs17881180		SOD1 rs17880998		SOD1 rs17880196		SOD1 rs17880135
		N	C	T	G	A	C	T	T	G
1	Biaka Pygmy	69	1	0	0.397059	0.602941	1	0	1	0
2	Mbuti Pygmy	39	1	0	0.368421	0.631579	0.986486	0.0135135	1	0
3	Yoruba	78	1	0	0.525641	0.474359	0.948718	0.0512821	1	0
4	Ibo	48	1	0	0.572917	0.427083	0.947917	0.0520833	1	0
5	Hausa	39	1	0	0.628205	0.371795	0.907895	0.0921053	1	0
6	Chagga	45	1	0	0.577778	0.422222	0.933333	0.0666667	1	0
7	Masai	20	1	0	0.6	0.4	0.925	0.075	1	0
8	Sandawe	40	1	0	0.6625	0.3375	0.7375	0.2625	1	0
9	Ethiopian Jews	32	1	0	0.90625	0.09375	0.625	0.375	1	0
10	African Amer	91	0.989011	0.010989	0.653846	0.346154	0.884615	0.115385	0.983333	0.0166667
11	Yemenite Jews	43	0.94186	0.0581395	0.872093	0.127907	0.674419	0.325581	0.94186	0.0581395
12	Druze	101	0.980198	0.019802	0.975248	0.0247525	0.426316	0.573684	0.980198	0.019802
13	Samaritans	40	1	0	0.961538	0.0384615	0.777778	0.222222	1	0
14	Adygei	54	0.962963	0.037037	0.915094	0.0849057	0.611111	0.388889	0.953704	0.0462963
15	Chuvash	42	0.928571	0.0714286	0.841463	0.158537	0.682927	0.317073	0.926829	0.0731707
16	Russians, Arch.	33	0.953125	0.046875	0.734375	0.265625	0.78125	0.21875	0.954545	0.0454545
17	Russians, Vologda	47	0.893617	0.106383	0.880435	0.119565	0.744444	0.255556	0.920455	0.0795455
18	Ashkenazi Jews	81	0.969136	0.0308642	0.882716	0.117284	0.6	0.4	0.969136	0.0308642
19	Finns	36	0.985714	0.0142857	0.814286	0.185714	0.828571	0.171429	0.986111	0.0138889
20	Hungarians	89	0.931818	0.0681818	0.882022	0.117978	0.730337	0.269663	0.91573	0.0842697
21	Danes	51	0.921569	0.0784314	0.88	0.12	0.72	0.28	0.872549	0.127451
22	Irish	115	0.93913	0.0608696	0.878261	0.121739	0.70614	0.29386	0.938596	0.0614035
23	EuroAmer	91	0.967033	0.032967	0.912088	0.0879121	0.655556	0.344444	0.961538	0.0384615
24	Komi Zyriane	47	0.819149	0.180851	0.946809	0.0531915	0.648936	0.351064	0.819149	0.180851
25	Khanty	50	0.96	0.04	0.9	0.1	0.53	0.47	0.96	0.04
26	Keralite, S. India	30	0.965517	0.0344828	0.810345	0.189655	0.683333	0.316667	0.948276	0.0517241
27	Chinese, S.F.	58	1	0	0.396552	0.603448	0.663793	0.336207	1	0
28	Chinese, Taiwan	50	1	0	0.55	0.45	0.6	0.4	1	0
29	Hakka	41	1	0	0.512195	0.487805	0.65	0.35	1	0
30	Koreans	54	1	0	0.490566	0.509434	0.611111	0.388889	1	0
31	Japanese	51	1	0	0.47	0.53	0.627451	0.372549	1	0
32	Ami	40	1	0	0.425	0.575	0.85	0.15	1	0
33	Atayal	42	1	0	0.5	0.5	0.55	0.45	1	0
34	Cambodians	24	1	0	0.5	0.5	0.75	0.25	1	0
35	Laotians	119	1	0	0.487395	0.512605	0.781513	0.218487	0.995798	0.00420168
36	Nasioi	23	1	0	0.695652	0.304348	0.695652	0.304348	1	0
37	Micronesians	37	1	0	0.432432	0.567568	0.675676	0.324324	0.986111	0.0138889
38	Yakut	51	0.980392	0.0196078	0.715686	0.284314	0.568627	0.431373	0.979592	0.0204082
39	Cheyenne	56	1	0	0.339286	0.660714	0.848214	0.151786	1	0
40	Pima, Arizona	51	1	0	0.352941	0.647059	0.852941	0.147059	1	0
41	Pima, Mexico	53	1	0	0.396226	0.603774	0.622642	0.377358	1	0
42	Maya	51	0.990196	0.00980392	0.588235	0.411765	0.617647	0.382353	0.99	0.01
43	Quechua	23	1	0	0.608696	0.391304	0.826087	0.173913	1	0
44	Ticuna	65	1	0	0.492308	0.507692	0.876923	0.123077	1	0
45	Rondonian Surui	46	1	0	0.711111	0.288889	0.688889	0.311111	1	0
46	Karitiana	55	1	0	0.601852	0.398148	1	0	1	0
