# Supplementary material for: Multiple Superoxide Dismutase 1/Splicing Factor Serine Alanine 15 Variants Are Associated With the Development and Progression of Diabetic Nephropathy
Source: Oxford University Press journal article supplement (doi:10.2337/db07-1059), 2007-10-04
Supplement: db071059ola25.xls [file db071059ola25.xls]

## Sheet: Sheet1
Martingale residuals for persistent microalbuminuria
Marker	Option	Allele	afreq	fam#	Z	P	Offset
SOD1_rs17880135	additive (fbat -o)	1	0.932	167	-1.027	0.304524	0.010834
SOD1_rs17880135	additive (fbat -o)	2	0.068	167	1.027	0.304524	0.010834
SOD1_rs17881180	additive (fbat -o)	1	0.067	155	1.199	0.230495	0.021396
SOD1_rs17881180	additive (fbat -o)	2	0.933	155	-1.199	0.230495	0.021396
SOD1_rs202446	additive (fbat -o)	1	0.163	343	2.099	0.035827	0.010053
SOD1_rs202446	additive (fbat -o)	2	0.837	343	-2.099	0.035827	0.010053
Martingale residuals for severe nephropathy
Marker	Option	Allele	afreq	fam#	Z	P	Offset
SOD1_rs17880135	additive (fbat -o)	1	0.932	163	0.464	0.642305	0.012467
SOD1_rs17880135	additive (fbat -o)	2	0.068	163	-0.464	0.642305	0.012467
SOD1_rs17881180	additive (fbat -o)	1	0.067	152	0.102	0.918368	0.019309
SOD1_rs17881180	additive (fbat -o)	2	0.933	152	-0.102	0.918368	0.019309
SOD1_rs202446	additive (fbat -o)	1	0.163	332	0.608	0.542958	0.009253
SOD1_rs202446	additive (fbat -o)	2	0.837	332	-0.608	0.542958	0.009253
