# Supplementary material for: Multiple Superoxide Dismutase 1/Splicing Factor Serine Alanine 15 Variants Are Associated With the Development and Progression of Diabetic Nephropathy
Source: Oxford University Press journal article supplement (doi:10.2337/db07-1059), 2007-10-04
Supplement: db071059ola26.xls [file db071059ola26.xls]

## Sheet: Sheet1
Online Appendix Table . Family structures of probands & relatives with available genotype used in family based analyses.
This includes only relatives with genotypes available for at least one of the SOD1 markers
1368 nuclear families with at least one SOD1 SNP genotype data
number of families with no probands with genotype data	2
number of families with no probands and with two parents	1
number of families with no probands and with two parents and >1 sibilings	1
number of families with no parents with genotype data	502
number of families with no parents and no sibilings	357
number of families with no parents and with 1 sibiling	78
number of families with no parents and with >1 sibilings	67
number of families with one parent with genotype data	362
number of families with one parent and no sibilings	69
number of families with one parent and with 1 sibiling	111
number of families with one parent and with >1 sibilings	182
number of families with two parents with genotype data	502
number of families with two parents and no sibilings	89
number of families with two parents and with 1 sibiling	278
number of families with two parents and with >1 sibilings	135
